# Supplementary material for: Distinct H3K27me3 and H3K27ac Modifications in Neural Tube Defects Induced by Benzo[a]pyrene
Source: MDPI journal article supplement (doi:10.3390/brainsci13020334), 2023-02-15
Supplement: s1 [file s1]

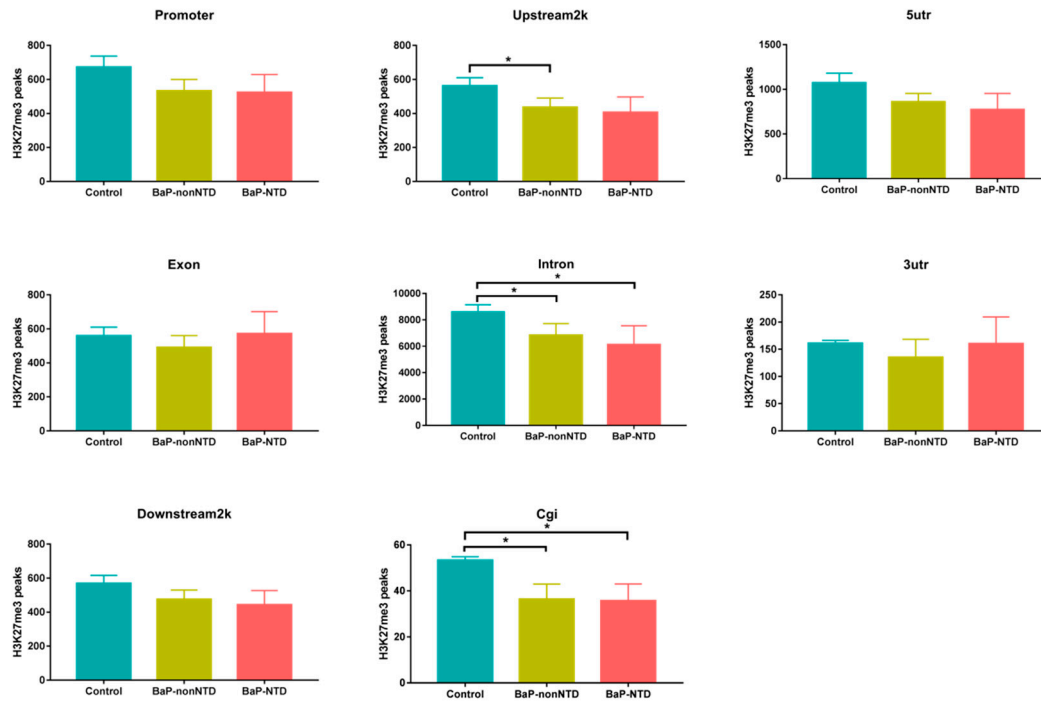

**Supplementary figure S1** Genome-wide peak distribution of H3K27me3 in E9.5 embryos with and without neural tube defects. \*,  $p$ -value  $< 0.05$ , compared to control group.

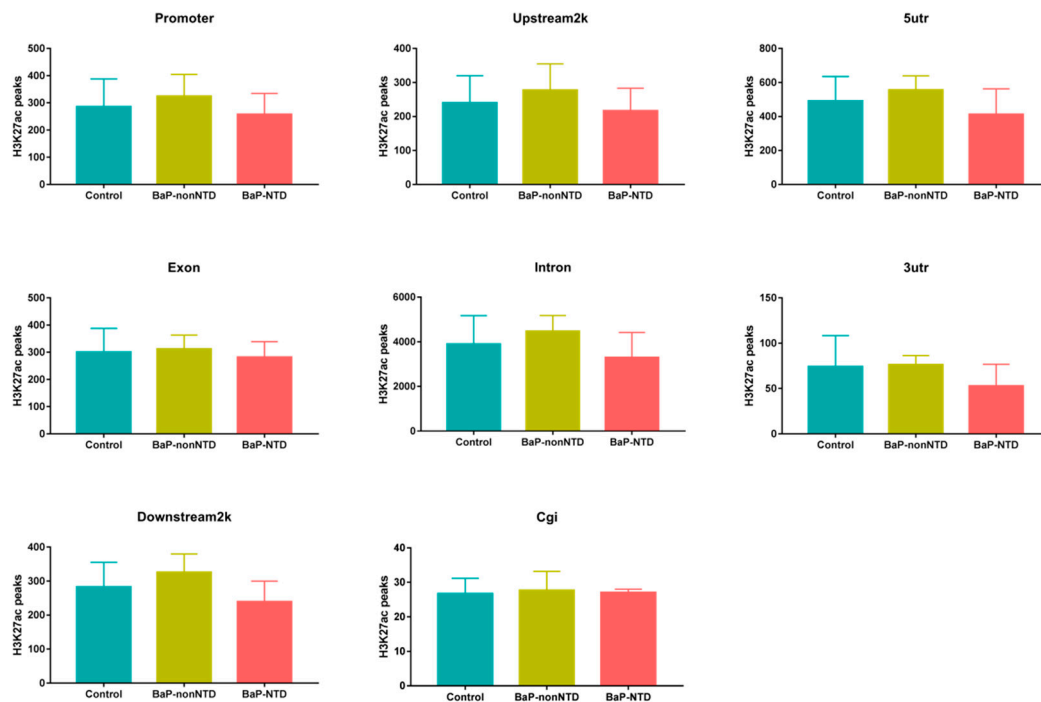

**Supplementary figure S2** Genome-wide peak distribution of H3K27ac in E9.5 embryos with and without neural tube defects. \*,  $p$ -value  $< 0.05$ , compared to control group.

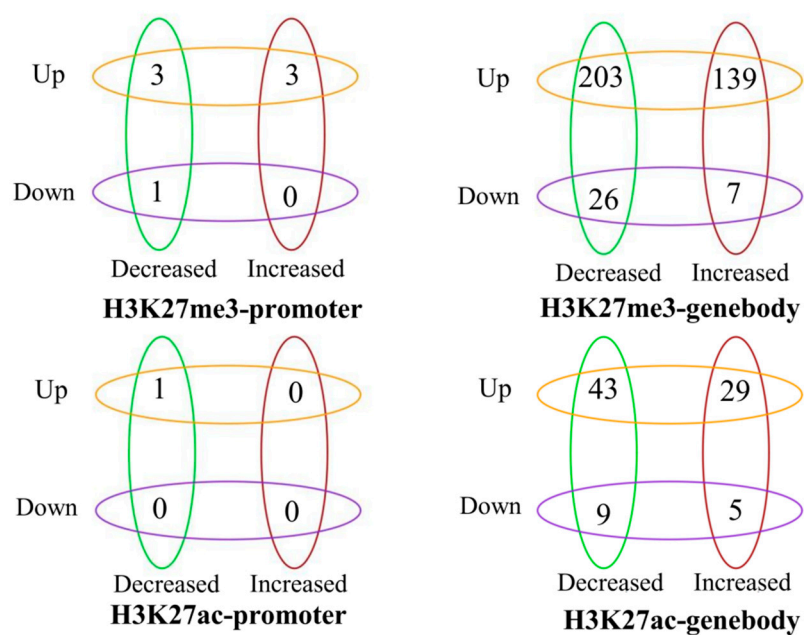

**Supplementary figure S3** The relationships between fold change of CUT&Tag signals for H3K27me3/H3K27ac and fold change of gene expressions in BaP-NTD-vs-control comparison.

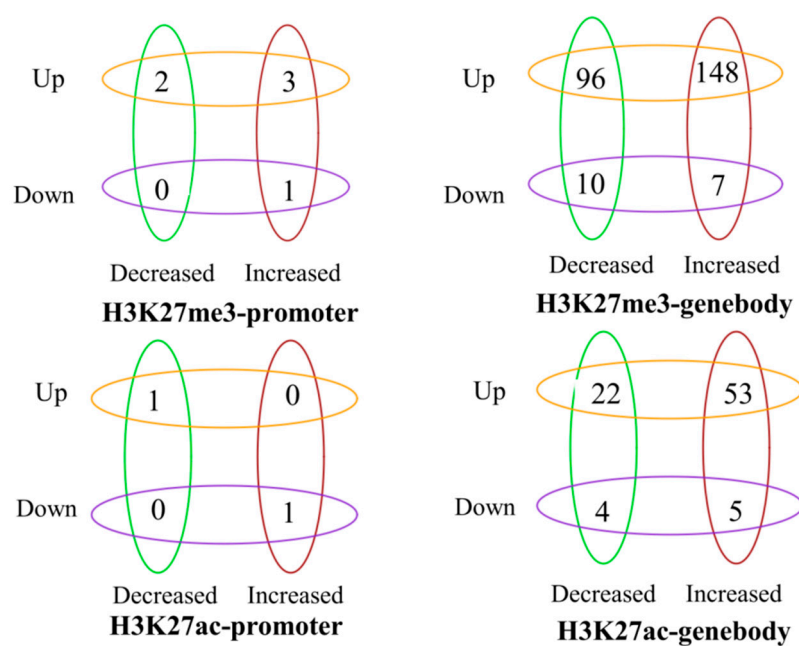

**Supplementary figure S4** The relationships between fold change of CUT&Tag signals for H3K27me3/H3K27ac and fold change of gene expressions in BaP-nonNTD-vs-control comparison.

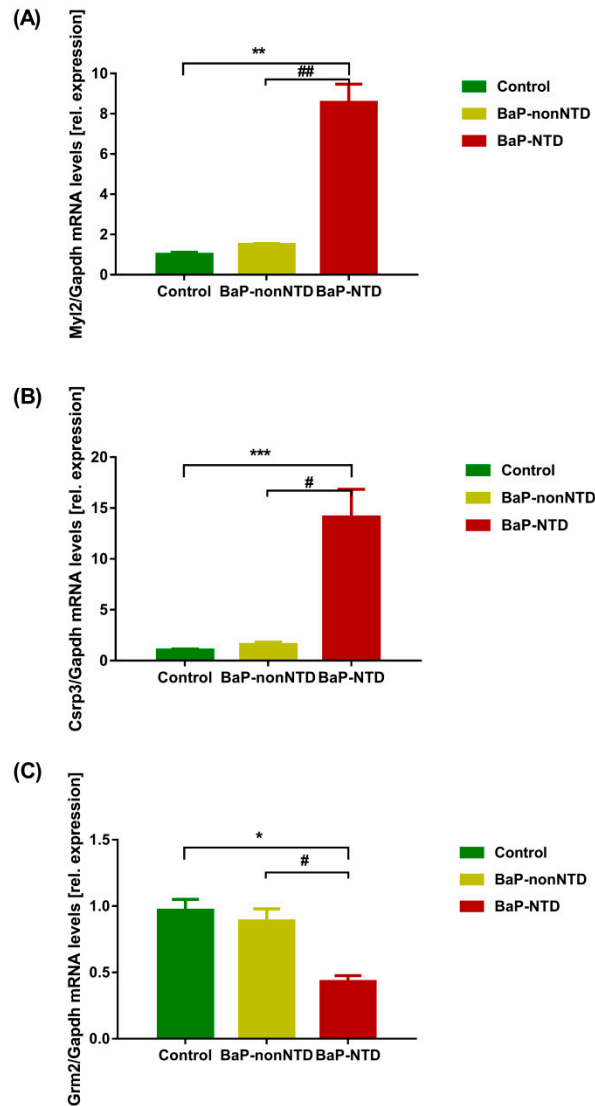

**Supplementary figure S5** Relative expression of mRNA of E9.5 embryos E9.5 embryos with and without neural tube defects by real-time PCR. Data for Myl2, Csrp3 and Grm2 were normalized by Gapdh for each sample (mean  $\pm$  SE; n = 3). \*,  $p < 0.05$  or \*\*,  $p < 0.01$  or \*\*\*,  $p < 0.001$  vs control; #,  $p < 0.05$  or ##,  $p < 0.01$  or ###,  $p < 0.001$  vs BaP-nonNTD.
