# Supplementary material for: Distinct H3K27me3 and H3K27ac Modifications in Neural Tube Defects Induced by Benzo[a]pyrene
Source: MDPI journal article supplement (doi:10.3390/brainsci13020334), 2023-02-15
Supplement: s1 [file s1]

**Supplementary Table S1** Embryotoxicity of BaP in ICR mice.

| Group         | Litters, n | Embryos, n | Death, n(%) | Resorption, n(%) | Grwoth retardation, n(%) | Cephalic NTDs, n(%) | Other malformations, n(%) |
|---------------|------------|------------|-------------|------------------|--------------------------|---------------------|---------------------------|
| Corn oil      | 15         | 180        | 2 (1.1)     | 3 (1.7)          | 3 (1.7)                  | 4 (2.2)             | 3 (1.7)                   |
| BaP-treatment | 35         | 475        | 22 (4.6)    | 62 (13.1)        | 77 (16.2)                | 78 (16.4)           | 172 (36.2)                |

**Supplementary Table S2** Sequences of primers for real-time PCR.

| Primer | Forward sequence       | Reverse sequence      |
|--------|------------------------|-----------------------|
| MyI2   | CAGATGTTTCGCAGCCTTTCC  | TACAGTGGATGAGGGCAACTC |
| Csrp3  | GGACAAGAGTCCCCTTACTCAG | CCGTCTTTTCACAGGCTCCA  |
| Grm2   | TCAATGCCGTGTATGCCATG   | TGTAGCGGCCAATACCATCT  |
| Gapdh  | CAGTGAGAAAGTCGGAGTCA   | GACACCCATCACAAACATGG  |

**Supplementary Table S3** Descriptive summary of data generated by CUT&Tag for H3K27me3.

| Sample ID   | Raw Reads | Clean Reads | Clean Ratio (%) | Mapped Reads | Mapping Ratio (%) |
|-------------|-----------|-------------|-----------------|--------------|-------------------|
| Control1    | 26817910  | 25725480    | 95.93%          | 24808959     | 89.88%            |
| Control2    | 22774371  | 21504001    | 94.42%          | 20857323     | 89.84%            |
| Control3    | 27730821  | 26572550    | 95.82%          | 25375810     | 91.96%            |
| BaP-nonNTD1 | 34304441  | 32913865    | 95.95%          | 32808250     | 88.98%            |
| BaP-nonNTD2 | 23047714  | 22060373    | 95.72%          | 21523050     | 88.22%            |
| BaP-nonNTD3 | 20219027  | 19650216    | 97.19%          | 19296121     | 90.31%            |
| BaP-NTD1    | 29402338  | 28268280    | 96.14%          | 28148111     | 89.17%            |
| BaP-NTD2    | 26186193  | 25141059    | 96.01%          | 25004387     | 87.99%            |
| BaP-NTD3    | 23213007  | 22079696    | 95.12%          | 21208952     | 86.87%            |

**Supplementary Table S4** Descriptive summary of data generated by CUT&Tag for H3K27ac.

| Sample ID   | Raw Reads | Clean Reads | Clean Ratio (%) | Mapped Reads | Mapping Ratio (%) |
|-------------|-----------|-------------|-----------------|--------------|-------------------|
| Control1    | 26162957  | 25612134    | 97.89%          | 25406736     | 89.88%            |
| Control2    | 23957159  | 23051848    | 96.22%          | 22985619     | 89.84%            |
| Control3    | 24860346  | 24031492    | 96.67%          | 23787717     | 91.96%            |
| BaP-nonNTD1 | 21024432  | 20232213    | 96.23%          | 19896430     | 88.98%            |
| BaP-nonNTD2 | 21594953  | 20793733    | 96.29%          | 20424862     | 88.22%            |
| BaP-nonNTD3 | 25151970  | 24605502    | 97.83%          | 24395161     | 90.31%            |
| BaP-NTD1    | 24443131  | 23863840    | 97.63%          | 23742604     | 89.17%            |
| BaP-NTD2    | 23937398  | 22557980    | 94.24%          | 22499179     | 87.99%            |
| BaP-NTD3    | 22866977  | 22075139    | 96.54%          | 21889674     | 86.87%            |

**Supplementary Table S5** Peak widths of H3K27me3 and H3K27ac in E9.5 mouse embryos with and without neural tube defects.

|               | Control             | BaP-nonNTD          | BaP-NTD             |
|---------------|---------------------|---------------------|---------------------|
| H3K27me3      |                     |                     |                     |
| Mean $\pm$ SD | 289.76 $\pm$ 175.75 | 298.56 $\pm$ 208.33 | 344.44 $\pm$ 265.29 |
| P-value       |                     | <0.001*             | 0<0.001*            |

H3K27ac

|               |                     |                     |                     |
|---------------|---------------------|---------------------|---------------------|
| Mean $\pm$ SD | 378.90 $\pm$ 322.39 | 300.52 $\pm$ 254.52 | 444.30 $\pm$ 369.59 |
| P-value       |                     | <0.001*             | 0<0.001*            |

NTD, neural tube defects; SD, standard deviation; \*, compared with control group.

**Supplementary Table S18** Descriptive summary of data generated by RNA-seq.

| Sample ID   | Raw Reads | Clean Reads | Clean Ratio (%) | Mapped Reads | Mapping Ratio (%) |
|-------------|-----------|-------------|-----------------|--------------|-------------------|
| Control1    | 22720614  | 22247446    | 97.92%          | 19996004     | 89.88%            |
| Control2    | 27926555  | 27342431    | 97.91%          | 24564440     | 89.84%            |
| Control3    | 23647287  | 23136116    | 97.84%          | 21275972     | 91.96%            |
| BaP-nonNTD1 | 23610109  | 23129880    | 97.97%          | 20580967     | 88.98%            |
| BaP-nonNTD2 | 20002335  | 19590948    | 97.94%          | 17283134     | 88.22%            |
| BaP-nonNTD3 | 24149312  | 23611317    | 97.77%          | 21323380     | 90.31%            |
| BaP-NTD1    | 20854309  | 20393130    | 97.79%          | 18184554     | 89.17%            |
| BaP-NTD2    | 25403525  | 24887109    | 97.97%          | 21898167     | 87.99%            |
| BaP-NTD3    | 23062798  | 22547272    | 97.76%          | 19586815     | 86.87%            |
