# Supplementary material for: Distinct H3K27me3 and H3K27ac Modifications in Neural Tube Defects Induced by Benzo[a]pyrene
Source: Brain Sci. 2023 Feb 15;13(2):334. doi: 10.3390/brainsci13020334 (PMC9954656; doi:10.3390/brainsci13020334)
Supplement: Supplementary file 1 [file brainsci-13-00334-s001.zip]

Archive with 4 entries (4 files):
- Additional file S1.pdf
- Additional file S2.xlsx
- Additional file S3.xlsx
- Additional file S4.pdf
