# Supplementary material for: Distinct H3K27me3 and H3K27ac Modifications in Neural Tube Defects Induced by Benzo[a]pyrene
Source: Brain Sci. 2023 Feb 15;13(2):334. doi: 10.3390/brainsci13020334 (PMC9954656; doi:10.3390/brainsci13020334)
Supplement: Supplementary file 1 [file brainsci-13-00334-s001.zip › Additional file S2.xlsx]

## Sheet: Table S6
Supplementary Table S6 Gene Ontology enrichment analysis of 397 mutual H3K27me3 peak binding genes for BaP-NTD and BaP-nonNTD.
Term	Ontology	ID	Description	Gene ratio	Bg ratio	P-value	Adjusted P-value	Q-value	Gene ID	Count
GO:0050808	BP	GO:0050808	synapse organization	105/1811	486/23355	2.44485e-22	1.36056e-18	1.09298e-18	210933/319387/11735/239027/54126/11418/11941/12217/12286/12298/12300/12558/12565/107932/244682/12386/18163/13048/69601/217480/64451/244667/103967/13631/13640/270190/13844/13869/111173/238988/223254/14183/70598/333605/14360/14402/14658/23888/268566/14804/14811/14812/108071/56637/26556/16001/230868/16180/331461/60367/16443/545156/67703/242384/110648/16917/70530/241568/66725/243499/50791/17762/32077…	105
GO:0007409	BP	GO:0007409	axonogenesis	98/1811	483/23355	6.60679e-19	1.83834e-15	1.47679e-15	226251/110532/11658/11735/11787/50769/319974/12286/12552/12558/12561/213084/12661/269784/244682/53870/12808/77018/12386/13131/13176/239667/244667/330938/13430/67299/12934/13508/114873/13518/13640/13840/270190/13844/14026/14183/108655/320027/14633/56637/16001/545156/16572/16772/16774/231876/110648/16971/14725/241568/17756/71751/17760/17762/17181/269878/17919/17967/319504/211323/80883/18212/18213/1…	98
GO:0007626	BP	GO:0007626	locomotory behavior	67/1811	263/23355	1.3631e-18	2.52856e-15	2.03127e-15	76192/319387/11548/11682/382543/319924/11784/11804/11899/11941/20238/100568459/224671/12286/12288/12290/12298/22295/12614/12661/13131/13508/14167/14169/103199/14658/14681/14708/14811/14816/108071/15932/545156/16531/93688/16847/110648/16917/66725/268890/26414/17762/171166/78286/17978/17993/320840/18143/27386/211323/18203/18216/170719/11994/18754/53901/19699/20273/56747/94229/109205/214585/80297/21…	67
GO:0016358	BP	GO:0016358	dendrite development	72/1811	309/23355	1.43467e-17	1.99598e-14	1.60343e-14	11308/210933/11682/239985/13196/12286/227541/213084/12808/382056/239420/12386/18163/13048/13131/69601/110197/64451/244667/103967/13508/13631/270190/13844/223254/270120/14260/320027/14360/242443/74053/56637/94253/16180/331461/29875/232227/16443/545156/93688/66725/17756/17760/17181/17919/83814/192167/211323/18212/74143/218194/327814/243725/277360/19091/19266/76089/56508/19699/68703/19876/330222/203…	72
GO:0098742	BP	GO:0098742	cell-cell adhesion via plasma-membrane adhesion molecules	56/1811	209/23355	8.00878e-17	8.91377e-14	7.16069e-14	319387/11658/12552/215654/12554/320865/227485/12558/104010/22295/381409/12561/12563/12565/12614/244682/53870/170788/13131/13508/114873/13640/270120/23888/14804/545370/230868/16180/331461/16579/67703/241568/50791/23938/320772/192167/319504/18189/80883/72333/11994/12936/12939/18613/19266/19274/19281/19876/268902/330222/13602/23963/23964/23965/23966/210801	56
GO:0034329	BP	GO:0034329	cell junction assembly	85/1811	432/23355	9.80692e-16	9.09592e-13	7.30702e-13	60595/210933/319387/11856/11418/192197/12217/12286/12552/215654/320865/227485/12558/104010/12563/12565/70737/76707/56173/74987/244682/235431/18163/13048/50768/13383/103967/13518/13631/13640/13823/270190/13844/13869/223254/14260/14402/23888/14804/56637/16180/331461/60367/29875/16398/83964/67703/16774/77569/242384/16971/243499/50791/17762/320772/83814/320840/192167/211323/100042150/18189/18190/1819…	85
GO:0043087	BP	GO:0043087	regulation of GTPase activity	69/1811	318/23355	3.28388e-15	2.61068e-12	2.09724e-12	109934/69710/212285/76117/239027/231532/11856/54126/13196/230837/192197/12053/69993/69601/227801/320127/67299/105445/13640/14681/14683/14697/67839/56637/29875/544963/232227/545156/66725/18003/56349/18212/18213/18613/227937/18845/243743/54712/277360/19091/19276/29809/241694/380711/229877/107746/76089/192786/19417/240168/50779/24012/20163/319934/217692/244668/74206/66616/14270/223754/381085/210789/…	69
GO:0042391	BP	GO:0042391	regulation of membrane potential	85/1811	451/23355	1.31748e-14	9.16475e-12	7.36231e-12	11549/238161/432442/100986/109676/11735/101772/11418/20238/12286/12288/12289/12298/12300/12491/12638/382056/216033/13048/320127/13383/13405/13483/14167/14169/108655/14402/14407/14657/14658/14675/14682/14799/14804/14805/14807/14811/14812/56637/15165/16510/170738/70357/72258/217826/16526/16531/140492/16535/66725/17002/17762/71960/338370/17993/83814/192167/319504/18189/18212/18213/18216/98496/667742…	85
GO:0050890	BP	GO:0050890	cognition	69/1811	345/23355	2.22484e-13	1.37569e-10	1.10513e-10	20927/104111/210933/11548/14266/11980/20238/224671/12288/12290/12661/66797/382056/94109/18163/13048/320127/13411/27103/13844/13853/14402/14652/14683/14799/14811/14812/108071/108073/71828/15932/16002/241226/545156/16497/16867/110648/16917/17762/17536/17967/17993/18189/18190/18203/18212/18216/242202/218461/18795/19085/19088/18750/18762/19165/53901/19699/20317/210274/20418/208431/26570/109205/66673/…	69
GO:0031346	BP	GO:0031346	positive regulation of cell projection organization	80/1811	436/23355	3.5094e-13	1.95298e-10	1.56889e-10	11682/69710/11881/50769/319974/192197/227541/12561/213084/12808/382056/13048/69601/13176/244667/330938/13405/13430/103967/13508/13631/13640/103199/14348/14360/74053/56637/208727/16001/16180/331461/29875/16398/16438/545156/16971/242274/17096/50791/71751/17760/17762/232944/269878/667663/329421/17919/320840/192167/211323/18212/18213/18261/74143/74055/18845/243743/54712/243725/71461/19266/235442/1077…	80
GO:0099173	BP	GO:0099173	postsynapse organization	49/1811	203/23355	5.17127e-13	2.61619e-10	2.10166e-10	239027/54126/12558/18163/13048/217480/64451/103967/13631/270190/13844/223254/333605/14360/14658/268566/14804/14811/14812/26556/16001/16180/331461/545156/70530/66725/243499/50791/17919/192167/319504/18189/18190/18213/74143/327814/243725/19266/56508/19699/210274/380702/217692/26570/20411/29819/66860/21844/81907	49
GO:0050807	BP	GO:0050807	regulation of synapse organization	57/1811	261/23355	6.26276e-13	2.90436e-10	2.33315e-10	210933/319387/239027/11418/12558/12386/13048/69601/217480/244667/103967/13631/13640/270190/13844/223254/333605/14360/23888/14804/14812/56637/26556/16180/331461/60367/16443/545156/242384/70530/66725/243499/50791/320772/17919/320840/192167/319504/100042150/18189/18212/18213/74143/327814/243725/18750/19266/19277/56508/19699/210274/217692/26570/13602/29819/66860/21844	57
GO:0035418	BP	GO:0035418	protein localization to synapse	33/1811	103/23355	7.6173e-13	3.26079e-10	2.61949e-10	77531/11418/12217/12300/54377/76380/13383/23859/224997/23888/268566/14811/74053/56637/26556/545156/16572/242274/50791/26414/17762/192167/54631/18189/18190/18762/80718/56508/19699/380702/29819/20908/665113	33
GO:0007411	BP	GO:0007411	axon guidance	55/1811	250/23355	1.16176e-12	4.56559e-10	3.66767e-10	226251/11658/11735/11787/12561/12661/269784/244682/53870/13176/12934/13508/114873/13640/13840/270190/13844/14026/108655/14633/16572/16772/16774/231876/110648/16971/14725/17181/269878/17967/319504/18261/18845/243743/54712/19206/19274/19277/19699/19876/268902/20346/108151/20356/20357/214968/20563/20564/17128/319757/23964/22253/210801/22422/67263	55
GO:0050803	BP	GO:0050803	regulation of synapse structure or activity	58/1811	273/23355	1.33815e-12	4.56559e-10	3.66767e-10	210933/319387/239027/11418/12558/12386/13048/69601/217480/244667/13430/103967/13631/13640/270190/13844/223254/333605/14360/23888/14804/14812/56637/26556/16180/331461/60367/16443/545156/242384/70530/66725/243499/50791/320772/17919/320840/192167/319504/100042150/18189/18212/18213/74143/327814/243725/18750/19266/19277/56508/19699/210274/217692/26570/13602/29819/66860/21844	58
GO:0097485	BP	GO:0097485	neuron projection guidance	55/1811	251/23355	1.37749e-12	4.56559e-10	3.66767e-10	226251/11658/11735/11787/12561/12661/269784/244682/53870/13176/12934/13508/114873/13640/13840/270190/13844/14026/108655/14633/16572/16772/16774/231876/110648/16971/14725/17181/269878/17967/319504/18261/18845/243743/54712/19206/19274/19277/19699/19876/268902/20346/108151/20356/20357/214968/20563/20564/17128/319757/23964/22253/210801/22422/67263	55
GO:0031589	BP	GO:0031589	cell-substrate adhesion	69/1811	358/23355	1.3947e-12	4.56559e-10	3.66767e-10	60595/239337/230959/11600/69538/11856/226255/14595/12927/192197/12053/12491/12554/12571/76707/140709/235431/13132/244667/50768/13405/13430/330662/68813/13607/13612/13640/268780/270190/14158/14260/72007/56637/29875/319480/16398/241226/16420/223272/83964/77569/16971/230316/18003/56349/18073/18074/80883/246190/18552/244895/18613/208177/83436/277360/18754/18762/74030/20163/78473/64074/208777/20411/20…	69
GO:1902414	BP	GO:1902414	protein localization to cell junction	38/1811	136/23355	1.75033e-12	5.41142e-10	4.34715e-10	18671/60595/77531/11418/12217/12300/54377/76380/68178/13383/23859/224997/23888/268566/14811/74053/56637/26556/83964/545156/16572/242274/50791/26414/17762/192167/54631/18189/18190/18613/18762/80718/56508/19699/380702/29819/20908/665113	38
GO:1904062	BP	GO:1904062	regulation of cation transmembrane transport	70/1811	370/23355	2.39917e-12	7.02705e-10	5.64503e-10	20927/238161/432442/100986/109676/11735/11418/381290/12286/12288/12289/12298/12300/54377/215748/69635/13367/13383/13405/13430/269109/13483/13844/14167/14169/14360/14697/14811/269994/15165/94253/26556/16497/70357/80334/16535/16867/17096/83814/192167/18125/70729/319239/18189/18216/108737/233571/18578/238871/59020/18704/18795/234779/19017/18754/19091/19165/545622/19417/19699/24012/19739/20191/210274…	70
GO:0007264	BP	GO:0007264	small GTPase mediated signal transduction	78/1811	439/23355	3.77667e-12	1.05086e-09	8.44184e-10	109934/11549/11548/99371/215821/73910/231532/71302/330914/72754/71704/381112/54126/319974/12053/12554/12558/12614/68178/54366/13131/69601/227801/320127/50768/13430/330662/94176/208869/238130/68813/67299/105445/140580/13844/223254/23881/232227/16443/545156/16706/333050/75104/56349/211323/380698/18613/74055/277360/234353/241694/380711/107746/76089/56508/217944/19417/240168/19699/69288/19876/66922/2…	78
GO:0032412	BP	GO:0032412	regulation of ion transmembrane transporter activity	56/1811	265/23355	4.08383e-12	1.07979e-09	8.67427e-10	18671/20927/238161/432442/100986/109676/11735/11418/12286/12289/12298/12300/54377/12638/215748/69635/13383/13405/13430/13844/14167/14169/14697/14811/108071/269994/15165/94253/26556/16497/16535/83814/192167/70729/18189/18216/108737/233571/18578/238871/59020/18795/234779/19017/18750/19091/545622/19417/19699/19739/20191/210274/380702/20840/20866/116873	56
GO:0007416	BP	GO:0007416	synapse assembly	46/1811	193/23355	4.26871e-12	1.07979e-09	8.67427e-10	210933/319387/11418/12217/12286/12558/12565/244682/13048/103967/13631/13640/270190/13844/13869/223254/14402/23888/14804/56637/16180/331461/60367/67703/242384/243499/50791/17762/320772/320840/192167/211323/100042150/18189/18190/18191/18212/18213/243725/18750/19266/19699/330222/210274/217692/29819	46
GO:0007611	BP	GO:0007611	learning or memory	61/1811	308/23355	8.43641e-12	2.04124e-09	1.63979e-09	20927/104111/210933/11548/14266/11980/20238/224671/12288/12290/66797/382056/94109/18163/13048/320127/13411/27103/13844/13853/14402/14652/14799/14811/14812/108071/108073/15932/16002/241226/545156/16497/110648/16917/17762/17536/17967/18189/18190/18203/18212/18216/242202/218461/18795/19085/19088/18750/18762/19165/53901/19699/20317/210274/20418/26570/66673/104015/21336/66860/21960	61
GO:0032409	BP	GO:0032409	regulation of transporter activity	58/1811	287/23355	1.16687e-11	2.70569e-09	2.17356e-09	18671/20927/238161/432442/100986/109676/11735/11418/12286/12289/12298/12300/54377/12638/215748/69635/13383/13405/13430/13844/14167/14169/14697/14811/108071/269994/15165/94253/26556/16497/16535/76273/83814/192167/70729/18189/18216/108737/233571/18578/238871/59020/18795/234779/18979/19017/18750/19091/545622/19417/19699/19739/20191/210274/380702/20840/20866/116873	58
GO:0099003	BP	GO:0099003	vesicle-mediated transport in synapse	54/1811	257/23355	1.24311e-11	2.76716e-09	2.22294e-09	11549/319924/11784/12217/224671/12286/12298/27062/320405/12558/227801/320127/13430/103967/111173/238988/14169/242443/74053/108073/14823/269994/56637/232227/16443/16510/66725/50791/26414/17919/192167/18189/18191/18805/327814/19085/18750/18751/18754/80718/56508/116837/116838/108800/20908/78808/207227/27204/64009/104015/20980/60510/208898/69727	54
GO:0030534	BP	GO:0030534	adult behavior	44/1811	187/23355	1.96818e-11	4.21266e-09	3.38415e-09	76192/11548/11682/20238/100568459/224671/12286/12288/12298/22295/12661/66797/13131/14167/14169/14658/14805/108073/26556/15932/545156/16531/93688/17762/17993/18125/18189/18190/18203/18216/170719/11994/19013/20273/330222/56747/210274/26570/80297/21916/22095/209012/69727/50518	44
GO:0022898	BP	GO:0022898	regulation of transmembrane transporter activity	56/1811	276/23355	2.23462e-11	4.60579e-09	3.69997e-09	18671/20927/238161/432442/100986/109676/11735/11418/12286/12289/12298/12300/54377/12638/215748/69635/13383/13405/13430/13844/14167/14169/14697/14811/108071/269994/15165/94253/26556/16497/16535/83814/192167/70729/18189/18216/108737/233571/18578/238871/59020/18795/234779/19017/18750/19091/545622/19417/19699/19739/20191/210274/380702/20840/20866/116873	56
GO:2001257	BP	GO:2001257	regulation of cation channel activity	42/1811	179/23355	6.16638e-11	1.22557e-08	9.84535e-09	20927/238161/432442/109676/11735/11418/12286/12298/12300/54377/69635/13383/13405/13844/14167/14169/14697/14811/269994/15165/26556/16497/16535/83814/192167/70729/18189/18216/233571/18578/238871/234779/19017/19091/19417/19699/19739/210274/380702/20840/20866/116873	42
GO:0051056	BP	GO:0051056	regulation of small GTPase mediated signal transduction	54/1811	273/23355	1.38098e-10	2.65005e-08	2.12886e-08	109934/11549/11548/99371/215821/73910/231532/71302/72754/71704/381112/54126/319974/12053/12558/68178/69601/227801/320127/50768/13430/94176/13844/223254/232227/16443/545156/75104/56349/211323/380698/74055/277360/234353/241694/380711/107746/19417/19699/19876/217692/244668/74206/20563/20662/20663/219140/243362/21844/24001/21858/223435/22325/57257	54
GO:0007156	BP	GO:0007156	homophilic cell adhesion via plasma membrane adhesion molecules	31/1811	110/23355	1.50085e-10	2.78408e-08	2.23653e-08	12552/215654/12554/12558/104010/22295/381409/12561/12563/12565/12614/244682/53870/13508/114873/270120/545370/230868/67703/319504/72333/11994/12936/12939/18613/19274/19281/19876/268902/330222/23965	31
GO:0043547	BP	GO:0043547	positive regulation of GTPase activity	48/1811	228/23355	1.57973e-10	2.83588e-08	2.27814e-08	109934/69710/212285/239027/231532/11856/54126/13196/230837/192197/227801/67299/105445/14681/14683/14697/56637/232227/545156/18003/56349/18213/227937/277360/29809/241694/380711/229877/107746/76089/192786/19417/50779/24012/20163/217692/244668/74206/66616/14270/223754/381085/210789/72238/71310/21844/24001/98910	48
GO:0048813	BP	GO:0048813	dendrite morphogenesis	42/1811	185/23355	1.86821e-10	3.24894e-08	2.60997e-08	11308/210933/12286/213084/12386/18163/13048/64451/103967/13508/13631/270190/13844/223254/14260/14360/56637/94253/331461/545156/66725/17760/17919/83814/192167/74143/218194/327814/243725/19266/76089/19699/68703/19876/20346/210274/217692/29819/64009/21844/665113/67095	42
GO:0050770	BP	GO:0050770	regulation of axonogenesis	42/1811	186/23355	2.23467e-10	3.76847e-08	3.02732e-08	12286/12558/12561/213084/13131/239667/244667/330938/13508/13640/13844/320027/56637/16971/241568/17756/71751/17760/17762/269878/17919/211323/18212/18213/18261/18845/243743/54712/19876/268902/20346/108151/20356/20357/214968/217692/20563/21844/24001/21960/67095/338362	42
GO:0001508	BP	GO:0001508	action potential	35/1811	138/23355	2.48745e-10	4.07137e-08	3.27065e-08	11549/109676/11735/12288/12289/12298/12491/216033/13383/13405/13483/14167/108655/14675/14682/14799/14811/14812/15165/70357/16531/140492/16535/71960/83814/319504/18212/18213/18216/545622/56508/20191/110880/20273/21336	35
GO:0099504	BP	GO:0099504	synaptic vesicle cycle	47/1811	228/23355	5.13214e-10	8.1601e-08	6.55525e-08	11549/319924/11784/12217/224671/12286/12298/27062/320405/12558/227801/320127/13430/103967/111173/238988/14169/242443/108073/14823/56637/16443/16510/66725/50791/192167/18189/18191/18805/327814/19085/18750/18751/18754/80718/56508/116837/116838/108800/20908/78808/207227/27204/104015/20980/60510/208898	47
GO:0019932	BP	GO:0019932	second-messenger-mediated signaling	58/1811	318/23355	7.83293e-10	1.15959e-07	9.31532e-08	210044/238161/109676/381290/12289/100072/67252/12491/12554/76469/13405/20336/14200/14652/14677/14683/14816/108071/56637/234889/208727/16438/16706/333050/16867/66725/17762/52589/17967/17993/18018/18019/18125/211323/18212/23984/54611/18576/238871/242202/29863/18585/243725/105787/19085/19088/19091/76089/56508/53901/116838/20191/319229/24052/20495/20541/23964/21943	58
GO:0007269	BP	GO:0007269	neurotransmitter secretion	41/1811	186/23355	7.91813e-10	1.15959e-07	9.31532e-08	11549/319924/11784/12286/12298/27062/320405/320127/111173/238988/242443/108073/14823/56637/15893/16510/108030/66725/78771/192167/18189/18190/18191/18212/327814/243725/18750/18751/18754/19276/116837/116838/67847/20908/78808/207227/27204/104015/20980/60510/208898	41
GO:0099643	BP	GO:0099643	signal release from synapse	41/1811	186/23355	7.91813e-10	1.15959e-07	9.31532e-08	11549/319924/11784/12286/12298/27062/320405/320127/111173/238988/242443/108073/14823/56637/15893/16510/108030/66725/78771/192167/18189/18190/18191/18212/327814/243725/18750/18751/18754/19276/116837/116838/67847/20908/78808/207227/27204/104015/20980/60510/208898	41
GO:0050773	BP	GO:0050773	regulation of dendrite development	33/1811	133/23355	1.47591e-09	2.10601e-07	1.69182e-07	210933/11682/227541/213084/12808/382056/239420/13048/69601/110197/13631/270120/56637/94253/16180/331461/29875/545156/17919/83814/18212/74143/277360/19266/76089/56508/19699/19876/217692/29819/64009/21844/665113	33
GO:0032414	BP	GO:0032414	positive regulation of ion transmembrane transporter activity	31/1811	120/23355	1.59509e-09	2.21917e-07	1.78272e-07	18671/20927/238161/432442/100986/109676/11735/11418/12298/12300/54377/12638/215748/13405/13430/13844/14169/15165/83814/18216/233571/59020/18795/234779/19091/19699/19739/20191/20840/20866/116873	31
GO:0032411	BP	GO:0032411	positive regulation of transporter activity	32/1811	128/23355	2.12655e-09	2.88641e-07	2.31873e-07	18671/20927/238161/432442/100986/109676/11735/11418/12298/12300/54377/12638/215748/13405/13430/13844/14169/15165/83814/18216/233571/59020/18795/234779/18979/19091/19699/19739/20191/20840/20866/116873	32
GO:0048638	BP	GO:0048638	regulation of developmental growth	67/1811	403/23355	2.23629e-09	2.96309e-07	2.38033e-07	100705/238161/50769/12288/12561/213084/12818/239667/244667/13383/13430/12934/13508/13640/223650/13869/14183/108655/320027/26383/14683/56637/16001/16002/16468/16526/16971/17756/71751/17762/109241/269878/17919/17967/83814/211323/18213/18261/18795/102502/243743/19013/19206/19664/116837/116838/20346/108151/20356/20357/214968/73094/20563/319757/70834/80297/56274/20980/21388/24087/74493/21960/106628/22…	67
GO:0097120	BP	GO:0097120	receptor localization to synapse	23/1811	72/23355	2.37068e-09	3.0681e-07	2.46469e-07	77531/12300/54377/76380/13383/23859/23888/268566/74053/56637/545156/16572/242274/50791/26414/192167/18189/18762/56508/19699/380702/20908/665113	23
GO:0006836	BP	GO:0006836	neurotransmitter transport	47/1811	242/23355	3.95258e-09	4.85965e-07	3.9039e-07	11549/319924/11784/12286/12298/27062/320405/320127/111173/238988/242443/108073/14823/56637/15893/16510/108030/66725/78771/192167/18125/18189/18190/18191/18212/327814/243725/18750/18751/18754/19276/116837/116838/20518/20519/229706/104245/67847/20908/78808/207227/64176/27204/104015/20980/60510/208898	47
GO:0035249	BP	GO:0035249	synaptic transmission, glutamatergic	29/1811	111/23355	4.01696e-09	4.85965e-07	3.9039e-07	12286/12298/12300/54377/12558/320127/244667/14802/14803/14804/14805/14807/110637/14816/108071/108073/14823/26556/545156/66725/192167/18189/18212/19699/26564/210274/20418/21960/208898	29
GO:0099175	BP	GO:0099175	regulation of postsynapse organization	29/1811	111/23355	4.01696e-09	4.85965e-07	3.9039e-07	239027/12558/13048/217480/103967/13631/14360/14804/14812/26556/16180/331461/545156/70530/66725/192167/319504/18189/18213/74143/327814/243725/19266/56508/19699/217692/29819/66860/21844	29
GO:1904064	BP	GO:1904064	positive regulation of cation transmembrane transport	37/1811	168/23355	5.36031e-09	6.34683e-07	5.0986e-07	20927/238161/432442/100986/109676/11735/11418/12288/12289/12298/12300/54377/215748/13405/13430/13483/13844/14169/15165/16535/16867/83814/18125/319239/18216/233571/59020/18795/234779/19091/19699/24012/19739/20191/20840/20866/116873	37
GO:0048588	BP	GO:0048588	developmental cell growth	50/1811	269/23355	5.94085e-09	6.88767e-07	5.53307e-07	11549/11548/238161/319974/12561/213084/12808/12818/239667/244667/13430/12934/13508/13640/27103/108655/320027/56637/29875/16971/17756/71751/17762/269878/17919/83814/211323/18213/18261/243743/19013/18762/19091/116837/116838/20346/108151/20356/20357/214968/20563/20564/319757/70834/214585/20980/21844/81907/21960/106628	50
GO:0051648	BP	GO:0051648	vesicle localization	38/1811	178/23355	8.32535e-09	9.26983e-07	7.44673e-07	60595/12558/76707/13430/103967/12934/13426/20336/210998/14183/17281/16553/16572/108030/66725/50791/17756/338367/71602/17919/208943/17922/245049/192167/18189/327814/18762/80718/19349/89867/110380/214585/27204/104015/67095/109181/77573/50518	38
GO:1901888	BP	GO:1901888	regulation of cell junction assembly	43/1811	216/23355	8.32869e-09	9.26983e-07	7.44673e-07	210933/319387/11856/11418/192197/76707/13048/50768/13631/13640/270190/13844/223254/14260/23888/14804/56637/16180/331461/60367/29875/77569/242384/16971/243499/320772/83814/320840/192167/100042150/18189/18212/18213/244895/208177/243725/18750/18755/19266/107746/76089/217692/29819	43
GO:0006887	BP	GO:0006887	exocytosis	64/1811	391/23355	9.49646e-09	1.03623e-06	8.32435e-07	109934/11549/319924/11784/99371/12286/12288/12298/27062/320405/12638/76707/27278/320127/67753/111173/238988/20336/320051/14158/14389/242443/108073/14823/56637/331461/16443/16510/108030/66725/17096/194401/17919/17967/192167/18189/18191/18704/327814/18750/18751/18754/52055/80718/67295/19349/235442/56508/116837/116838/107767/212986/20908/78808/207227/104015/238266/20980/60510/83672/208898/77573/2236…	64
GO:1990778	BP	GO:1990778	protein localization to cell periphery	61/1811	367/23355	1.17099e-08	1.25318e-06	1.00672e-06	11733/109676/11735/12306/68146/381290/100503572/74741/12300/54377/12558/13132/13383/23859/269109/13483/13823/13844/13853/23880/14677/23888/268566/241263/14811/74053/56637/545156/80334/16553/108030/16971/50791/26414/17919/18189/107975/59020/98496/102502/18762/19206/67295/19349/235442/76089/56508/192786/380702/78473/20411/80297/20840/20908/55943/665113/70423/56224/225049/104718/213081	61
GO:0010720	BP	GO:0010720	positive regulation of cell development	61/1811	368/23355	1.29964e-08	1.36462e-06	1.09624e-06	18671/20238/12561/213084/12638/13048/13132/244667/330938/13430/330662/68813/13508/13631/13640/13844/108071/56637/331461/76527/545156/16971/14725/17096/71751/17760/17762/269878/17919/18003/56349/211323/18212/18213/18261/74143/54611/242202/18845/243743/54712/277360/18755/19266/19699/19726/19876/268902/12394/20356/20317/66993/319757/29819/104015/23966/21844/24001/21943/67095/22062	61
GO:0008344	BP	GO:0008344	adult locomotory behavior	28/1811	110/23355	1.38185e-08	1.42407e-06	1.144e-06	76192/20238/100568459/224671/12286/12288/12298/22295/12661/13131/14167/14169/14658/15932/545156/16531/93688/17762/17993/18203/18216/170719/11994/20273/56747/80297/21916/22095	28
GO:0010976	BP	GO:0010976	positive regulation of neuron projection development	43/1811	220/23355	1.47209e-08	1.48948e-06	1.19655e-06	11682/11881/50769/227541/12808/382056/13048/69601/13176/244667/13405/13631/103199/14348/14360/16001/16180/29875/16438/545156/16971/242274/17096/50791/17762/320840/18212/18213/18261/74143/243725/71461/107746/76089/19699/26563/26564/106298/20317/29819/20257/23965/21844	43
GO:0007612	BP	GO:0007612	learning	38/1811	182/23355	1.57744e-08	1.56758e-06	1.25928e-06	20927/104111/210933/11548/11980/20238/12288/12290/66797/94109/18163/320127/27103/13844/13853/14402/14652/14811/14812/108071/108073/15932/545156/17536/18189/18190/18212/18216/218461/19088/19699/210274/26570/66673/104015/21336/66860/21960	38
GO:0060560	BP	GO:0060560	developmental growth involved in morphogenesis	50/1811	277/23355	1.61511e-08	1.57685e-06	1.26673e-06	319974/12561/213084/12808/239667/244667/13430/12934/13508/13640/27103/13982/14183/14260/320027/56637/29875/269152/16971/17756/71751/17762/269878/17919/83814/211323/18213/18261/243743/235542/18762/71461/116837/116838/19876/20346/108151/20356/20357/214968/20563/20564/319757/70834/214585/20980/21844/81907/21960/22422	50
GO:0010810	BP	GO:0010810	regulation of cell-substrate adhesion	43/1811	221/23355	1.69267e-08	1.62408e-06	1.30467e-06	60595/230959/11856/12927/192197/12053/12491/12554/12571/76707/140709/235431/13132/244667/50768/13405/13430/330662/68813/13612/13640/268780/14260/56637/29875/77569/16971/18003/56349/18073/18552/244895/208177/83436/277360/18754/18762/74030/20163/78473/64074/20745/22288	43
GO:0035637	BP	GO:0035637	multicellular organismal signaling	33/1811	147/23355	2.15618e-08	2.03376e-06	1.63377e-06	109676/11735/12286/12288/12289/12290/12298/12300/54377/216033/13483/14167/14799/108073/16398/83964/16531/140492/16535/71960/319504/18212/18213/246190/238871/56508/20191/110880/20273/20541/80297/435766/21960	33
GO:0001764	BP	GO:0001764	neuron migration	39/1811	192/23355	2.27901e-08	2.11378e-06	1.69806e-06	319387/11787/11899/56079/319974/12614/12661/12386/13131/69601/13176/244667/13869/270120/14360/56637/67703/16917/17762/17181/320772/211323/18183/80883/18212/18213/218194/19091/76089/19699/76816/20346/59009/20745/14270/209012/210801/328365/67263	39
GO:0007215	BP	GO:0007215	glutamate receptor signaling pathway	17/1811	46/23355	2.44745e-08	2.23279e-06	1.79367e-06	269060/14360/14682/14805/14807/14811/14812/242443/14816/108071/108073/14823/26556/545156/18795/21844/17364	17
GO:0051963	BP	GO:0051963	regulation of synapse assembly	29/1811	121/23355	3.2888e-08	2.93392e-06	2.3569e-06	210933/319387/11418/13048/13631/13640/270190/13844/223254/23888/14804/56637/16180/331461/60367/242384/243499/320772/320840/192167/100042150/18189/18212/18213/243725/18750/19266/217692/29819	29
GO:0007160	BP	GO:0007160	cell-matrix adhesion	42/1811	218/23355	3.32142e-08	2.93392e-06	2.3569e-06	239337/230959/11856/14595/192197/12053/12491/12554/12571/76707/235431/244667/50768/13405/13607/13640/14260/56637/29875/319480/16398/241226/16420/223272/83964/77569/16971/18073/18074/246190/18552/244895/18613/208177/83436/18762/74030/78473/208777/20411/21844/22288	42
GO:0007265	BP	GO:0007265	Ras protein signal transduction	58/1811	352/23355	3.65387e-08	3.12828e-06	2.51304e-06	109934/11549/11548/99371/215821/231532/330914/72754/71704/381112/54126/319974/12053/12554/12558/12614/54366/69601/227801/320127/50768/13430/94176/140580/13844/223254/232227/16443/545156/16706/333050/75104/56349/211323/380698/18613/74055/277360/234353/241694/107746/76089/19417/240168/19876/66922/20163/20662/20663/219140/117600/243362/21844/24001/21858/223435/22325/57257	58
GO:0051962	BP	GO:0051962	positive regulation of nervous system development	58/1811	352/23355	3.65387e-08	3.12828e-06	2.51304e-06	210933/319387/11418/20238/12561/213084/13048/244667/330938/13508/13631/13640/270190/13844/14804/108071/56637/16180/331461/76527/545156/242384/16971/14725/243499/17096/71751/17760/17762/269878/17919/192167/211323/18189/18212/18213/18261/74143/18845/243743/54712/18750/18755/19266/19699/19876/268902/20356/20317/66993/319757/29819/104015/23966/21844/24001/67095/22062	58
GO:0030900	BP	GO:0030900	forebrain development	63/1811	397/23355	4.07808e-08	3.43856e-06	2.7623e-06	11682/11804/68146/12558/66797/72832/13131/69601/70762/244667/330938/50768/67299/110350/13844/13869/14183/14360/14633/14682/56637/320191/30841/67703/110648/14725/66725/14013/17967/20602/211323/18183/18212/218194/18795/243743/19091/19165/76089/218772/19664/19699/19876/268902/20346/20356/94229/26570/20563/319757/14270/230676/320165/57752/81907/21960/76510/22062/73668/209012/22422/328365/67263	63
GO:0106027	BP	GO:0106027	neuron projection organization	27/1811	109/23355	4.63268e-08	3.84789e-06	3.09112e-06	18163/13048/64451/103967/13631/270190/13844/14360/14811/14812/56637/26556/16001/545156/66725/17919/192167/74143/102502/327814/243725/19699/210274/217692/29819/66860/21844	27
GO:0016079	BP	GO:0016079	synaptic vesicle exocytosis	31/1811	138/23355	5.61758e-08	4.59733e-06	3.69317e-06	11549/319924/11784/12286/12298/27062/320405/320127/111173/238988/242443/108073/14823/56637/16510/66725/192167/18191/327814/18750/18751/18754/116837/116838/20908/78808/207227/104015/20980/60510/208898	31
GO:0001505	BP	GO:0001505	regulation of neurotransmitter levels	46/1811	255/23355	6.09435e-08	4.91522e-06	3.94854e-06	11549/319924/11784/12286/12298/27062/320405/269060/320127/111173/238988/242443/108073/14823/56637/15893/16510/108030/66725/78771/192167/18125/18189/18190/18191/18212/327814/243725/18750/18751/18754/19276/116837/116838/20518/20519/104245/67847/20908/78808/207227/27204/104015/20980/60510/208898	46
GO:0032970	BP	GO:0032970	regulation of actin filament-based process	64/1811	411/23355	6.56618e-08	5.22011e-06	4.19347e-06	242894/238161/109676/69710/73910/11856/72754/230837/66898/192197/12288/12345/12614/68178/76707/235431/12386/216033/330938/50768/13383/13640/14026/14158/225288/14260/319710/29875/544963/83964/57748/77569/16971/667663/329421/18125/50490/54631/18213/18484/93742/18578/238871/18613/208177/213556/320472/243725/277360/18754/69288/20191/20356/110380/20563/17128/66616/74392/29819/118449/21336/23963/21916/…	64
GO:1990138	BP	GO:1990138	neuron projection extension	39/1811	200/23355	7.24969e-08	5.68233e-06	4.56478e-06	319974/12561/213084/239667/244667/13430/12934/13508/27103/56637/29875/16971/17756/71751/17762/269878/17919/83814/211323/18213/18261/243743/18762/116837/116838/20346/108151/20356/20357/214968/20563/20564/319757/70834/214585/20980/21844/81907/21960	39
GO:0051966	BP	GO:0051966	regulation of synaptic transmission, glutamatergic	22/1811	79/23355	8.57404e-08	6.571e-06	5.27867e-06	12300/54377/12558/320127/244667/14802/14805/14807/14816/108071/108073/14823/26556/545156/66725/192167/18189/18212/19699/26564/210274/21960	22
GO:0006816	BP	GO:0006816	calcium ion transport	65/1811	423/23355	8.61963e-08	6.571e-06	5.27867e-06	11549/238161/109676/11941/381290/24115/320508/12286/12288/12289/12290/12294/12298/12300/54377/76856/22295/13367/13405/13853/270028/14169/14360/14652/14681/14697/14811/14812/242443/26556/16438/16439/16867/17096/216001/107589/338370/18018/18125/70729/319239/18216/74143/233571/18578/238871/171395/234779/381925/18751/18754/19165/19739/20190/20191/20192/94249/20541/20840/20866/116873/13409/22066/26946…	65
GO:0046578	BP	GO:0046578	regulation of Ras protein signal transduction	44/1811	242/23355	9.26491e-08	6.96746e-06	5.59716e-06	109934/11549/11548/99371/215821/231532/72754/71704/381112/54126/319974/12053/12558/69601/227801/320127/50768/13430/94176/13844/223254/232227/16443/545156/75104/56349/211323/380698/74055/277360/234353/107746/19417/19876/20662/20663/219140/243362/21844/24001/21858/223435/22325/57257	44
GO:0032535	BP	GO:0032535	regulation of cellular component size	64/1811	417/23355	1.13166e-07	8.3969e-06	6.74547e-06	242894/23797/73910/11941/66898/12345/12561/213084/12386/239667/244667/13383/13430/12934/13508/13640/14026/14158/225288/14260/320027/56637/544963/57748/16531/16971/17756/71751/17762/269878/667663/329421/17919/54631/211323/18213/18261/18613/213556/102502/243743/243725/277360/18754/380711/217835/74370/319229/20346/108151/20356/20357/214968/110380/20495/20563/66616/74392/23963/21916/21960/22062/24588…	64
GO:0021954	BP	GO:0021954	central nervous system neuron development	25/1811	100/23355	1.18907e-07	8.70683e-06	6.99445e-06	110532/78933/12552/13176/70762/244667/270190/13844/14183/14633/14682/16917/17756/18212/243743/18750/76089/19876/268902/20346/94229/20563/80297/230676/328365	25
GO:0007015	BP	GO:0007015	actin filament organization	67/1811	445/23355	1.20495e-07	8.70854e-06	6.99582e-06	11308/60595/242894/69710/73910/11856/72754/230837/66898/12927/12345/68178/76707/12808/235431/12386/13367/56419/50768/13383/140580/14026/14158/225288/14260/544963/57748/77569/194401/338367/71602/17919/208943/17922/74103/18003/50490/54631/18175/677884/11994/18613/218194/208177/213556/102502/170826/320472/243725/277360/18754/19201/69288/20356/110380/27428/208431/20563/66616/20411/74392/118449/21336/…	67
GO:0097061	BP	GO:0097061	dendritic spine organization	25/1811	101/23355	1.46483e-07	1.0451e-05	8.39557e-06	18163/13048/64451/103967/13631/270190/13844/14360/14811/14812/26556/16001/545156/66725/17919/192167/74143/327814/243725/19699/210274/217692/29819/66860/21844	25
GO:0051650	BP	GO:0051650	establishment of vesicle localization	33/1811	159/23355	1.57727e-07	1.11108e-05	8.92561e-06	60595/76707/13430/103967/12934/13426/20336/210998/14183/17281/16553/16572/108030/66725/17756/338367/71602/17919/208943/17922/245049/192167/327814/18762/80718/19349/89867/110380/214585/104015/67095/109181/50518	33
GO:0070588	BP	GO:0070588	calcium ion transmembrane transport	49/1811	289/23355	1.68552e-07	1.15283e-05	9.26098e-06	238161/109676/11941/381290/12286/12288/12289/12290/12294/12298/54377/13367/13405/270028/14169/14360/14652/14697/14811/14812/16438/16439/16867/17096/216001/338370/70729/319239/18216/74143/233571/18578/238871/171395/234779/18754/19165/19739/20190/20191/20192/94249/20541/20840/20866/116873/13409/22066/26946	49
GO:0034764	BP	GO:0034764	positive regulation of transmembrane transport	44/1811	247/23355	1.69868e-07	1.15283e-05	9.26098e-06	18671/20927/14081/238161/432442/100986/109676/11735/11418/74741/12288/12289/12298/12300/54377/12638/215748/13405/13430/13483/13844/13869/14169/15165/16535/16867/83814/18125/319239/18216/237542/233571/59020/18795/234779/19091/19699/24012/19739/20191/20411/20840/20866/116873	44
GO:0034767	BP	GO:0034767	positive regulation of ion transmembrane transport	44/1811	247/23355	1.69868e-07	1.15283e-05	9.26098e-06	18671/20927/14081/238161/432442/100986/109676/11735/11418/74741/12288/12289/12298/12300/54377/12638/215748/13405/13430/13483/13844/13869/14169/15165/16535/16867/83814/18125/319239/18216/237542/233571/59020/18795/234779/19091/19699/24012/19739/20191/20411/20840/20866/116873	44
GO:2001259	BP	GO:2001259	positive regulation of cation channel activity	22/1811	82/23355	1.76907e-07	1.18613e-05	9.52853e-06	20927/238161/432442/109676/11735/11418/12298/12300/54377/13844/14169/15165/83814/18216/233571/234779/19091/19699/19739/20840/20866/116873	22
GO:0050772	BP	GO:0050772	positive regulation of axonogenesis	25/1811	102/23355	1.79875e-07	1.19167e-05	9.57304e-06	12561/244667/330938/13508/13640/56637/16971/71751/17760/17762/269878/17919/211323/18212/18213/18261/18845/243743/54712/19876/268902/20356/21844/24001/67095	25
GO:0019226	BP	GO:0019226	transmission of nerve impulse	23/1811	89/23355	1.97151e-07	1.29076e-05	1.03691e-05	11735/12286/12290/12298/12300/54377/13483/14167/14799/108073/16398/83964/16531/71960/319504/18212/18213/246190/56508/110880/20273/80297/21960	23
GO:0007613	BP	GO:0007613	memory	32/1811	154/23355	2.34971e-07	1.52048e-05	1.22144e-05	20927/20238/224671/382056/94109/13048/27103/14402/14652/14799/14811/14812/108073/15932/16002/241226/545156/110648/16917/17762/18203/18212/242202/18795/18762/19165/53901/19699/20317/210274/66673/21336	32
GO:0071805	BP	GO:0071805	potassium ion transmembrane transport	38/1811	201/23355	2.44224e-07	1.56219e-05	1.25495e-05	20927/238161/432442/100986/109676/11735/12289/13383/13430/269109/13483/15165/16497/240444/16510/170738/70357/80334/16519/16522/72258/217826/16526/16531/140492/16535/226922/240776/16532/338370/83814/108737/19091/24012/20495/94249/226999/236727	38
GO:0062237	BP	GO:0062237	protein localization to postsynapse	19/1811	65/23355	2.79878e-07	1.76991e-05	1.42182e-05	12300/54377/13383/23859/23888/268566/14811/74053/56637/545156/16572/50791/26414/18762/56508/380702/29819/20908/665113	19
GO:0007018	BP	GO:0007018	microtubule-based movement	60/1811	394/23355	3.66675e-07	2.29275e-05	1.84183e-05	271639/104111/78933/71435/213402/381290/12217/12290/76856/226356/100048534/74453/380654/23859/56087/13411/110083/240960/330355/227058/100101919/13417/237806/13518/13426/110350/67068/226265/17281/244653/106633/245866/16348/16553/16558/16564/75050/16572/319991/16579/17756/17760/17762/56273/18762/80718/19726/66722/74362/320277/214585/29819/21336/81907/67095/73668/320244/209012/213081/269701	60
GO:0060996	BP	GO:0060996	dendritic spine development	28/1811	128/23355	4.34502e-07	2.68667e-05	2.15828e-05	239985/13196/18163/13048/64451/244667/103967/13631/270190/13844/320027/232227/16443/545156/66725/17919/192167/211323/74143/327814/243725/19699/330222/210274/217692/14270/29819/21844	28
GO:0090659	BP	GO:0090659	walking behavior	16/1811	49/23355	4.55478e-07	2.78542e-05	2.23761e-05	76192/12286/12288/12298/13131/14658/15932/16531/93688/17762/17993/170719/11994/20273/214585/80297	16
GO:0021953	BP	GO:0021953	central nervous system neuron differentiation	42/1811	239/23355	4.69416e-07	2.83946e-05	2.28102e-05	110532/78933/11941/12286/12552/13176/70762/244667/110350/270190/13844/13869/14183/14633/14682/14804/110648/16917/17756/18189/18212/18509/243743/18750/19206/76089/19876/268902/19883/20346/94229/20563/319757/20678/20745/80297/24069/230676/73668/210801/328365/67263	42
GO:0051965	BP	GO:0051965	positive regulation of synapse assembly	21/1811	80/23355	4.98943e-07	2.98561e-05	2.39843e-05	210933/319387/11418/13048/13631/13640/270190/13844/14804/56637/16180/331461/242384/243499/192167/18189/18212/18213/18750/19266/29819	21
GO:0030048	BP	GO:0030048	actin filament-based movement	28/1811	129/23355	5.1435e-07	3.04506e-05	2.44618e-05	60595/238161/109676/11787/12288/12289/216033/13383/14026/319710/140492/16535/77569/71960/338367/71602/17919/208943/17922/245049/83814/18125/93742/18578/238871/20191/24052/330319	28
GO:0006813	BP	GO:0006813	potassium ion transport	42/1811	241/23355	5.91178e-07	3.46306e-05	2.78198e-05	20927/238161/432442/100986/109676/11735/12289/13383/13430/269109/13483/14682/15165/16497/240444/16510/170738/70357/80334/16519/16522/72258/217826/16526/16531/140492/16535/226922/240776/16532/338370/83814/18125/108737/18798/19091/24012/110880/20495/94249/226999/236727	42
GO:0046928	BP	GO:0046928	regulation of neurotransmitter secretion	27/1811	123/23355	6.44924e-07	3.73855e-05	3.00328e-05	11549/319924/11784/12286/12298/320127/242443/108073/14823/56637/15893/16510/66725/78771/192167/18191/18212/327814/243725/18750/18751/18754/116837/116838/67847/78808/207227	27
GO:0099633	BP	GO:0099633	protein localization to postsynaptic specialization membrane	13/1811	34/23355	6.91939e-07	3.92922e-05	3.15646e-05	12300/54377/13383/23859/23888/268566/56637/545156/50791/18762/56508/380702/665113	13
GO:0099645	BP	GO:0099645	neurotransmitter receptor localization to postsynaptic specialization membrane	13/1811	34/23355	6.91939e-07	3.92922e-05	3.15646e-05	12300/54377/13383/23859/23888/268566/56637/545156/50791/18762/56508/380702/665113	13
GO:0048675	BP	GO:0048675	axon extension	29/1811	139/23355	7.77514e-07	4.37057e-05	3.511e-05	319974/12561/213084/239667/244667/13430/12934/13508/56637/16971/17756/71751/17762/269878/17919/211323/18213/18261/243743/20346/108151/20356/20357/214968/20563/20564/319757/214585/21960	29
GO:0010811	BP	GO:0010811	positive regulation of cell-substrate adhesion	28/1811	133/23355	9.89181e-07	5.47462e-05	4.39792e-05	12491/12554/12571/140709/13132/244667/13405/13430/330662/68813/13612/268780/14260/56637/29875/18003/56349/18073/18552/83436/277360/18754/18762/74030/20163/78473/64074/22288	28
GO:0050767	BP	GO:0050767	regulation of neurogenesis	64/1811	443/23355	1.00598e-06	5.47462e-05	4.39792e-05	20927/20238/12561/213084/13048/13131/239667/244667/330938/67299/13508/13631/13640/13844/320027/108071/56637/320191/331461/76527/545156/16971/14725/17096/17756/71751/17760/17762/269878/17919/18125/211323/18212/18213/18261/74143/18845/243743/54712/18755/19266/76089/19699/19876/268902/20346/108151/20356/20357/214968/20317/20563/66993/319757/20660/29819/104015/23966/21844/24001/21960/67095/22062/22422	64
GO:0016339	BP	GO:0016339	calcium-dependent cell-cell adhesion via plasma membrane cell adhesion molecules	13/1811	35/23355	1.02273e-06	5.47462e-05	4.39792e-05	12552/215654/12554/320865/227485/12558/104010/22295/12563/12565/16579/192167/18189	13
GO:0099068	BP	GO:0099068	postsynapse assembly	13/1811	35/23355	1.02273e-06	5.47462e-05	4.39792e-05	12558/13844/14804/16180/50791/192167/18189/18190/18213/19266/19699/210274/217692	13
GO:0051668	BP	GO:0051668	localization within membrane	23/1811	97/23355	1.03295e-06	5.47462e-05	4.39792e-05	12286/12300/54377/12554/12558/13383/23859/94176/14658/268566/14812/242274/243499/50791/192167/18189/18190/19699/76438/380702/26570/20411/213081	23
GO:0099072	BP	GO:0099072	regulation of postsynaptic membrane neurotransmitter receptor levels	23/1811	97/23355	1.03295e-06	5.47462e-05	4.39792e-05	12300/54377/13383/23859/13430/103967/23888/268566/74053/269994/56637/232227/545156/50791/26414/18762/56508/380702/20908/64009/104015/665113/69727	23
GO:2000300	BP	GO:2000300	regulation of synaptic vesicle exocytosis	21/1811	84/23355	1.19597e-06	6.27887e-05	5.044e-05	11549/319924/11784/12298/320127/242443/108073/14823/56637/16510/66725/192167/18191/327814/18750/18751/18754/116837/116838/78808/207227	21
GO:0050769	BP	GO:0050769	positive regulation of neurogenesis	47/1811	291/23355	1.25109e-06	6.44911e-05	5.18076e-05	20238/12561/213084/13048/244667/330938/13508/13631/13640/13844/108071/56637/331461/76527/545156/16971/14725/17096/71751/17760/17762/269878/17919/211323/18212/18213/18261/74143/18845/243743/54712/18755/19266/19699/19876/268902/20356/20317/66993/319757/29819/104015/23966/21844/24001/67095/22062	47
GO:0140029	BP	GO:0140029	exocytic process	23/1811	98/23355	1.25158e-06	6.44911e-05	5.18076e-05	27062/320405/12638/111173/238988/20336/17096/17967/192167/18189/67295/235442/116837/116838/212986/20908/78808/104015/20980/60510/208898/77573/22365	23
GO:0016311	BP	GO:0016311	dephosphorylation	57/1811	381/23355	1.27172e-06	6.49275e-05	5.21582e-05	215821/100072/76469/50768/23859/240672/13853/14048/14049/223254/67769/433899/234515/212111/29875/16398/76429/14245/50791/107895/74302/338367/98432/19012/381925/272031/170826/320472/319468/242083/228852/72930/269643/235542/26932/243819/71474/19248/19250/545622/19258/19263/19266/19270/19274/19275/19276/19277/19279/19281/19273/235534/24018/241919/68188/104015/243274	57
GO:0017157	BP	GO:0017157	regulation of exocytosis	41/1811	240/23355	1.36487e-06	6.90498e-05	5.54697e-05	109934/11549/319924/11784/12286/12298/27062/320405/12638/76707/320127/320051/14158/14389/242443/108073/14823/56637/331461/16510/66725/17096/17919/192167/18191/327814/18750/18751/18754/80718/67295/19349/235442/56508/116837/116838/78808/207227/20980/60510/26950	41
GO:0007628	BP	GO:0007628	adult walking behavior	15/1811	47/23355	1.44579e-06	7.2485e-05	5.82293e-05	76192/12286/12288/12298/13131/14658/15932/16531/93688/17762/17993/170719/11994/20273/80297	15
GO:1903539	BP	GO:1903539	protein localization to postsynaptic membrane	17/1811	59/23355	1.4695e-06	7.3016e-05	5.86559e-05	12300/54377/13383/23859/23888/268566/14811/74053/56637/545156/50791/26414/18762/56508/380702/20908/665113	17
GO:0030336	BP	GO:0030336	negative regulation of cell migration	46/1811	284/23355	1.49145e-06	7.34505e-05	5.90049e-05	20927/66082/109934/110532/381290/76707/69601/50768/223650/13869/170942/14026/56637/15378/52662/77569/16971/50791/23938/78771/17342/260315/211323/18183/237542/208177/18795/19017/19091/19270/19274/19279/19281/19273/19664/217835/19876/20346/214968/20317/20563/117600/14270/243362/240725/21388	46
GO:0090630	BP	GO:0090630	activation of GTPase activity	23/1811	99/23355	1.51183e-06	7.3801e-05	5.92865e-05	109934/239027/231532/192197/67299/18003/18213/29809/241694/380711/107746/19417/217692/244668/74206/223754/381085/210789/72238/71310/21844/24001/98910	23
GO:0003012	BP	GO:0003012	muscle system process	60/1811	412/23355	1.66613e-06	8.0626e-05	6.47692e-05	20927/11549/11548/238161/109676/381290/50769/12288/12289/76469/12818/216033/13383/13405/238130/68813/108655/56637/57080/208727/26556/16398/16468/16531/140492/16535/26399/71960/107589/242702/17993/83814/18018/18125/18578/238871/242202/18585/19013/18750/19091/19165/229877/20190/20191/20192/110880/24052/20541/17128/17129/20840/240725/21336/21676/21844/21916/435766/21955/106628	60
GO:0030516	BP	GO:0030516	regulation of axon extension	25/1811	114/23355	1.68661e-06	8.09138e-05	6.50004e-05	12561/213084/239667/244667/13430/12934/13508/56637/16971/17756/71751/17762/269878/17919/211323/18213/18261/243743/20346/108151/20356/20357/214968/20563/21960	25
GO:0061387	BP	GO:0061387	regulation of extent of cell growth	27/1811	129/23355	1.72814e-06	8.21973e-05	6.60314e-05	12561/213084/239667/244667/13430/12934/13508/13640/320027/56637/16971/17756/71751/17762/269878/17919/211323/18213/18261/243743/20346/108151/20356/20357/214968/20563/21960	27
GO:0031345	BP	GO:0031345	negative regulation of cell projection organization	37/1811	209/23355	1.84247e-06	8.68926e-05	6.98034e-05	231532/12345/213084/13131/13132/239667/13430/103967/13844/14026/270120/320027/14360/14812/56637/14964/16169/16971/66725/17756/192167/18189/235106/19270/380711/76089/19664/20346/108151/20356/20357/214968/20563/20745/20257/21960/233781	37
GO:0060078	BP	GO:0060078	regulation of postsynaptic membrane potential	25/1811	115/23355	1.99809e-06	9.344e-05	7.50631e-05	20238/13048/320127/14169/14402/14407/14799/14804/14805/14811/14812/56637/66725/192167/18189/18216/243725/18762/19699/24012/116837/116838/210274/64009/81907	25
GO:0040013	BP	GO:0040013	negative regulation of locomotion	51/1811	332/23355	2.0765e-06	9.62975e-05	7.73586e-05	20927/66082/109934/110532/381290/76707/69601/50768/223650/13869/170942/14026/108071/56637/15378/52662/77569/16971/50791/23938/78771/17342/260315/211323/18183/237542/208177/18795/19017/19091/19270/19274/19279/19281/19273/19664/217835/19876/268902/20346/108151/20356/20357/214968/20317/20563/117600/14270/243362/240725/21388	51
GO:0051271	BP	GO:0051271	negative regulation of cellular component movement	48/1811	306/23355	2.26238e-06	0.000104051	8.35871e-05	20927/66082/109934/60595/110532/381290/76707/69601/50768/223650/13869/170942/14026/56637/15378/52662/77569/16971/50791/23938/78771/17342/260315/18125/211323/18183/237542/208177/18795/19017/19091/19270/19274/19279/19281/19273/19664/217835/19876/20346/214968/20317/20563/117600/14270/243362/240725/21388	48
GO:0099560	BP	GO:0099560	synaptic membrane adhesion	12/1811	32/23355	2.37329e-06	0.000108257	8.6966e-05	12565/13640/23888/16180/241568/50791/320772/192167/18189/80883/19266/13602	12
GO:0060997	BP	GO:0060997	dendritic spine morphogenesis	19/1811	74/23355	2.4775e-06	0.000111936	8.99211e-05	18163/13048/64451/103967/13631/270190/13844/545156/66725/17919/192167/74143/327814/243725/19699/210274/217692/29819/21844	19
GO:0046777	BP	GO:0046777	protein autophosphorylation	40/1811	237/23355	2.49416e-06	0.000111936	8.99211e-05	269774/11682/57261/69635/13548/13631/15467/27103/18605/270190/13869/14158/14183/14254/14360/14773/56637/16001/29875/231876/66725/17096/71751/338372/17279/667663/329421/18099/18212/380698/108737/244895/26932/18750/19886/330177/665113/71943/69922/22612	40
GO:0007157	BP	GO:0007157	heterophilic cell-cell adhesion via plasma membrane cell adhesion molecules	15/1811	49/23355	2.61332e-06	0.000116345	9.34635e-05	11658/12558/12561/170788/14804/545370/230868/331461/192167/18189/19266/23963/23964/23965/23966	15
GO:0021537	BP	GO:0021537	telencephalon development	42/1811	255/23355	2.70493e-06	0.000119468	9.59721e-05	11682/68146/12558/72832/13131/69601/70762/244667/330938/13844/13869/56637/30841/67703/110648/66725/20602/211323/18183/18212/218194/18795/243743/218772/19699/19876/268902/20346/26570/20563/319757/14270/230676/320165/57752/81907/21960/76510/22062/209012/328365/67263	42
GO:0051588	BP	GO:0051588	regulation of neurotransmitter transport	28/1811	140/23355	2.88245e-06	0.000126306	0.000101465	11549/319924/11784/12286/12298/320127/242443/108073/14823/56637/15893/16510/66725/78771/192167/18125/18191/18212/327814/243725/18750/18751/18754/116837/116838/67847/78808/207227	28
GO:0071322	BP	GO:0071322	cellular response to carbohydrate stimulus	30/1811	156/23355	3.02257e-06	0.000131411	0.000105566	101772/11814/12289/12290/12638/13640/16001/16847/16971/16973/50490/18189/18504/18575/18576/218461/18795/105787/108079/18750/18751/18754/19275/19276/52055/20112/17128/21844/26950/56490	30
GO:0032956	BP	GO:0032956	regulation of actin cytoskeleton organization	54/1811	364/23355	3.09981e-06	0.000133724	0.000107425	242894/69710/73910/11856/72754/230837/66898/192197/12345/12614/68178/76707/235431/12386/330938/50768/13383/13640/14026/14158/225288/14260/29875/544963/83964/57748/77569/16971/667663/329421/50490/54631/18213/18484/18613/208177/213556/320472/243725/277360/18754/69288/20356/110380/20563/17128/66616/74392/29819/118449/21336/23963/21916/245880	54
GO:0007266	BP	GO:0007266	Rho protein signal transduction	33/1811	181/23355	3.37408e-06	0.000144437	0.00011603	109934/11549/11548/330914/72754/71704/381112/54126/12053/12554/12558/12614/54366/50768/223254/16443/545156/56349/380698/18613/277360/19417/19876/20662/20663/219140/117600/243362/21844/24001/223435/22325/57257	33
GO:0050905	BP	GO:0050905	neuromuscular process	28/1811	143/23355	4.43708e-06	0.000188491	0.000151421	109934/110532/382543/11804/11941/50769/12286/100072/22295/94109/12386/14167/14169/14658/14804/14811/14812/242443/16510/16531/27386/211323/18189/11994/218461/268859/20273/21960	28
GO:0006941	BP	GO:0006941	striated muscle contraction	31/1811	167/23355	4.49542e-06	0.000189523	0.000152249	11549/11548/238161/109676/50769/12288/12289/216033/13383/13405/208727/26556/140492/16535/26399/71960/83814/18125/18578/238871/242202/19165/20191/20192/110880/24052/20541/17129/20840/435766/21955	31
GO:0048639	BP	GO:0048639	positive regulation of developmental growth	37/1811	218/23355	5.1172e-06	0.000214114	0.000172004	100705/238161/50769/12561/244667/13383/13508/13640/13869/14183/56637/16001/16002/16971/71751/17762/269878/17919/17967/83814/211323/18213/18261/18795/102502/19664/116837/116838/20356/73094/319757/80297/20980/21388/106628/22095/22762	37
GO:2000146	BP	GO:2000146	negative regulation of cell motility	46/1811	297/23355	5.15824e-06	0.000214221	0.00017209	20927/66082/109934/110532/381290/76707/69601/50768/223650/13869/170942/14026/56637/15378/52662/77569/16971/50791/23938/78771/17342/260315/211323/18183/237542/208177/18795/19017/19091/19270/19274/19279/19281/19273/19664/217835/19876/20346/214968/20317/20563/117600/14270/243362/240725/21388	46
GO:0090257	BP	GO:0090257	regulation of muscle system process	40/1811	244/23355	5.20314e-06	0.000214485	0.000172302	20927/11549/11548/238161/109676/381290/12288/76469/216033/13383/13405/238130/68813/108655/56637/57080/208727/16398/16468/16531/16535/17993/18018/18578/238871/242202/18585/19013/18750/19091/20190/20191/110880/20541/17128/21336/21676/435766/21955/106628	40
GO:0019722	BP	GO:0019722	calcium-mediated signaling	34/1811	193/23355	5.29895e-06	0.000216828	0.000174184	238161/109676/381290/12289/100072/12554/76469/13405/20336/14200/14816/108071/56637/208727/16438/333050/16867/66725/17762/52589/17967/18018/18019/211323/18212/243725/105787/53901/20191/24052/20495/20541/23964/21943	34
GO:0043113	BP	GO:0043113	receptor clustering	18/1811	71/23355	5.5006e-06	0.000223437	0.000179493	12286/12558/13383/23859/14658/268566/14812/242274/243499/50791/192167/18189/18190/19699/380702/26570/20411/213081	18
GO:0072001	BP	GO:0072001	renal system development	50/1811	336/23355	6.49231e-06	0.000261809	0.000210319	108154/11600/11746/11764/83675/12359/12505/12829/13383/110350/13869/14048/14118/14183/14260/231470/14633/381157/16348/241226/269152/67703/14725/66725/14013/71602/18004/18027/18073/103468/18504/18514/18552/241035/74055/19206/71461/19277/218772/19876/268902/30953/20495/20563/17128/17129/319757/240725/329795/22422	50
GO:0035023	BP	GO:0035023	regulation of Rho protein signal transduction	27/1811	138/23355	6.62661e-06	0.000265303	0.000213126	109934/11549/11548/72754/71704/381112/54126/12053/12558/50768/223254/16443/545156/56349/380698/277360/19417/19876/20662/20663/219140/243362/21844/24001/223435/22325/57257	27
GO:0009187	BP	GO:0009187	cyclic nucleotide metabolic process	12/1811	35/23355	7.04471e-06	0.000280027	0.000224954	271639/210044/104111/11513/11515/11941/12298/18573/238871/242202/18585/19883	12
GO:0001952	BP	GO:0001952	regulation of cell-matrix adhesion	25/1811	123/23355	7.14238e-06	0.000281896	0.000226455	230959/11856/192197/12053/12491/12554/12571/76707/244667/50768/13405/13640/14260/56637/29875/77569/16971/18552/244895/208177/83436/18762/74030/78473/22288	25
GO:0031503	BP	GO:0031503	protein-containing complex localization	41/1811	257/23355	7.92915e-06	0.000310744	0.00024963	238161/77531/12300/54377/76380/13383/23859/13430/103967/110350/23888/268566/74053/269994/56637/106633/245866/232227/545156/16572/242274/50791/26414/17919/192167/18189/103468/18762/241694/56508/19699/24052/380702/29819/20908/64009/104015/665113/73668/69727/213081	41
GO:0001822	BP	GO:0001822	kidney development	48/1811	321/23355	8.63068e-06	0.000335872	0.000269816	108154/11600/11746/11764/83675/12359/12505/12829/13383/110350/13869/14048/14118/14183/14260/231470/14633/381157/16348/241226/269152/67703/14725/66725/71602/18004/18073/103468/18504/18514/18552/241035/74055/19206/71461/19277/218772/19876/268902/30953/20495/20563/17128/17129/319757/240725/329795/22422	48
GO:0007216	BP	GO:0007216	G protein-coupled glutamate receptor signaling pathway	8/1811	16/23355	9.40622e-06	0.000363511	0.000292019	269060/14807/14816/108071/108073/14823/26556/17364	8
GO:0001964	BP	GO:0001964	startle response	12/1811	36/23355	9.82342e-06	0.000374434	0.000300794	94109/12386/14658/14804/14811/14812/242443/16510/27386/211323/18189/11994	12
GO:0097106	BP	GO:0097106	postsynaptic density organization	12/1811	36/23355	9.82342e-06	0.000374434	0.000300794	12558/14804/16180/192167/18189/18190/18213/19266/19699/210274/217692/81907	12
GO:2001222	BP	GO:2001222	regulation of neuron migration	15/1811	54/23355	9.91538e-06	0.000375368	0.000301544	12386/69601/13869/56637/211323/18183/80883/218194/76089/19699/20346/14270/209012/210801/67263	15
GO:0001655	BP	GO:0001655	urogenital system development	54/1811	379/23355	1.03053e-05	0.000387494	0.000311285	108154/11600/11746/11764/83675/12359/12505/12829/13383/110350/13844/13869/13982/14048/14118/14183/14260/231470/14633/381157/16001/16348/241226/269152/67703/14725/66725/14013/71602/18004/18027/18073/103468/18504/18514/18552/241035/74055/19206/71461/19277/218772/19876/268902/30953/20317/20495/20563/17128/17129/319757/240725/329795/22422	54
GO:0072659	BP	GO:0072659	protein localization to plasma membrane	45/1811	296/23355	1.06053e-05	0.000395557	0.000317763	11733/109676/11735/12306/381290/74741/12558/13132/13383/269109/13483/13823/13844/13853/23880/241263/74053/545156/80334/16553/16971/17919/18189/107975/59020/98496/102502/18762/19206/67295/19349/235442/76089/192786/78473/20411/80297/20840/20908/55943/665113/70423/56224/225049/104718	45
GO:0071900	BP	GO:0071900	regulation of protein serine/threonine kinase activity	59/1811	427/23355	1.06619e-05	0.000395557	0.000317763	14081/108909/238161/11682/381290/12449/214444/13132/69601/240672/13844/14254/404194/14816/108071/56637/16001/76527/29875/16706/16973/66725/17002/17096/99470/23938/26399/71751/26407/338372/26390/50490/18189/18213/242202/74055/108099/19085/19088/18750/76089/19876/26564/74370/70097/20541/20660/70834/118449/330177/21676/23963/83383/21844/21943/665113/22062/78610/22422	59
GO:0051656	BP	GO:0051656	establishment of organelle localization	56/1811	399/23355	1.11727e-05	0.000411761	0.00033078	60595/78933/71435/12190/214444/76707/27278/13383/13430/103967/67299/12934/13426/78798/20336/14048/210998/14158/14183/17281/14389/320191/16553/16572/108030/66725/17096/17120/17756/17760/17762/338367/71602/17919/208943/17922/245049/192167/93742/72823/56273/241035/327814/18762/80718/19349/89867/110380/214585/64009/104015/320165/57752/67095/109181/50518	56
GO:0090596	BP	GO:0090596	sensory organ morphogenesis	47/1811	315/23355	1.13003e-05	0.000413723	0.000332356	109934/11941/50769/22295/12614/170788/13508/270190/13844/14048/270120/14183/14254/14633/15165/380614/241226/30841/320398/16973/214058/667663/329421/18212/21906/18504/11994/102502/235542/71461/19274/218772/26564/77945/330222/110380/109205/29819/100121/23965/21834/17364/22095/72747/22157/213081/21417	47
GO:0060537	BP	GO:0060537	muscle tissue development	64/1811	477/23355	1.19523e-05	0.000434735	0.000349235	11549/11548/238161/225638/11600/12818/12823/13007/13383/13405/227325/270190/13869/14048/14049/14183/14200/225288/14236/108655/56637/208727/79221/16656/26556/16002/241226/16468/16526/380664/14725/71960/107589/17967/74103/50490/54631/18175/211323/18509/22634/19013/19017/105787/19091/218772/268859/19664/20190/20191/30953/24052/244431/20541/17128/319757/20679/21388/23966/24087/106628/22062/241431/227…	64
GO:0099601	BP	GO:0099601	regulation of neurotransmitter receptor activity	17/1811	68/23355	1.21776e-05	0.000440055	0.000353509	12300/54377/69635/224997/244310/13844/14811/269994/26556/192167/18189/19017/19417/19699/19739/210274/380702	17
GO:0042692	BP	GO:0042692	muscle cell differentiation	57/1811	410/23355	1.24468e-05	0.000446882	0.000358993	210933/11549/11548/238161/225638/109676/12298/73647/12345/12558/12818/13007/13405/227325/14183/14200/225288/108655/56637/208727/79221/26556/16002/241226/74103/330721/18018/18019/50490/54631/18175/211323/19013/225518/19091/218772/19664/19883/20190/24052/20541/17128/66993/319757/69726/20679/70834/20866/64009/66860/21388/21916/21955/106628/278507/22422/21417	57
GO:0045860	BP	GO:0045860	positive regulation of protein kinase activity	60/1811	439/23355	1.26205e-05	0.000450213	0.000361669	14081/11549/238161/11682/11600/381290/13131/13132/69601/13383/14118/50754/14254/404194/14816/108071/15378/76527/29875/16706/66725/17002/99470/23938/26399/71751/26407/338372/26390/75104/18003/50490/211323/18189/18213/237542/242202/74055/243725/108099/18762/73137/76089/19699/19876/26564/74370/70097/66616/70834/56274/330177/21676/23963/21844/21943/665113/71943/22062/22422	60
GO:0002064	BP	GO:0002064	epithelial cell development	41/1811	262/23355	1.27618e-05	0.000451469	0.000362678	18671/100986/11941/14595/12558/22295/12571/12638/70737/12753/12819/12822/13405/13982/320051/14183/319710/15378/244653/71602/667663/329421/72333/93742/11994/18613/18795/102502/228852/107746/76089/218772/19726/19886/27428/74206/232156/319757/13409/21916/22422	41
GO:0060004	BP	GO:0060004	reflex	10/1811	26/23355	1.2818e-05	0.000451469	0.000362678	11549/319974/12286/22295/14658/16531/319239/11994/13409/69727	10
GO:0099111	BP	GO:0099111	microtubule-based transport	34/1811	201/23355	1.30647e-05	0.000457264	0.000367333	271639/78933/71435/12217/100048534/23859/13411/13518/13426/110350/17281/106633/245866/16348/16553/75050/16572/17756/17760/17762/56273/18762/80718/19726/66722/74362/320277/214585/29819/81907/67095/73668/209012/213081	34
GO:0035107	BP	GO:0035107	appendage morphogenesis	31/1811	176/23355	1.3575e-05	0.000469224	0.000376941	16764/12288/110350/30838/14183/14260/231470/14633/14682/14683/15932/106633/245866/380614/56873/16917/16973/14013/269878/18514/18552/18845/19165/19206/218772/26564/12393/70661/17128/21388/213081	31
GO:0035108	BP	GO:0035108	limb morphogenesis	31/1811	176/23355	1.3575e-05	0.000469224	0.000376941	16764/12288/110350/30838/14183/14260/231470/14633/14682/14683/15932/106633/245866/380614/56873/16917/16973/14013/269878/18514/18552/18845/19165/19206/218772/26564/12393/70661/17128/21388/213081	31
GO:0009100	BP	GO:0009100	glycoprotein metabolic process	49/1811	336/23355	1.39158e-05	0.000478032	0.000384017	333424/239337/66789/26877/93961/14595/71367/338337/233824/234356/66967/268780/53618/14348/231050/271786/233733/108148/108150/270049/76051/319415/50787/15932/15450/71738/17155/110173/67569/107895/83398/69352/18795/235534/170441/94229/72902/20441/20447/26938/20449/241230/240725/387314/278279/109181/80286/268880/233781	49
GO:0022604	BP	GO:0022604	regulation of cell morphogenesis	48/1811	328/23355	1.54506e-05	0.000527502	0.000423758	60595/69710/76117/73910/12927/12345/12505/213084/13048/13132/13367/50768/13383/13430/330662/68813/13631/13640/13823/14360/74053/331461/545156/71751/71960/17919/83814/18003/56349/80883/74143/677884/18845/243743/54712/277360/19266/19699/69288/116837/116838/27428/70834/29819/20980/70573/21844/245880	48
GO:0030705	BP	GO:0030705	cytoskeleton-dependent intracellular transport	33/1811	195/23355	1.72264e-05	0.000583094	0.000468416	60595/78933/71435/12217/23859/13518/13426/110350/17281/320191/106633/245866/16553/16572/17756/17760/17762/338367/71602/17919/208943/17922/245049/56273/327814/18762/80718/214585/29819/81907/67095/73668/213081	33
GO:0048814	BP	GO:0048814	regulation of dendrite morphogenesis	20/1811	91/23355	1.72885e-05	0.000583094	0.000468416	210933/213084/13048/13631/56637/94253/331461/545156/17919/83814/74143/19266/76089/19699/19876/217692/29819/64009/21844/665113	20
GO:0031644	BP	GO:0031644	regulation of nervous system process	32/1811	187/23355	1.82293e-05	0.000609283	0.000489455	54377/13048/224997/244310/14167/103199/14811/14816/56637/26556/16398/14245/66725/17967/192167/18125/211323/18189/18216/93742/18762/56508/19699/116837/116838/210274/380702/64009/23966/81907/21960/245880	32
GO:0071868	BP	GO:0071868	cellular response to monoamine stimulus	17/1811	70/23355	1.83935e-05	0.000609283	0.000489455	238161/11682/381290/13430/14675/14681/14682/14683/14697/15557/66725/18125/18197/18578/238871/19739/20191	17
GO:0071870	BP	GO:0071870	cellular response to catecholamine stimulus	17/1811	70/23355	1.83935e-05	0.000609283	0.000489455	238161/11682/381290/13430/14675/14681/14682/14683/14697/15557/66725/18125/18197/18578/238871/19739/20191	17
GO:0099565	BP	GO:0099565	chemical synaptic transmission, postsynaptic	21/1811	99/23355	1.91089e-05	0.000629235	0.000505483	20238/13048/320127/14402/14804/14805/14811/14812/56637/66725/192167/18189/18216/243725/18762/19699/116837/116838/210274/64009/81907	21
GO:0006936	BP	GO:0006936	muscle contraction	45/1811	303/23355	1.93618e-05	0.000633814	0.000509161	11549/11548/238161/109676/381290/50769/12288/12289/216033/13383/13405/238130/68813/208727/26556/16398/16531/140492/16535/26399/71960/107589/242702/83814/18125/18578/238871/242202/18750/19091/19165/229877/20190/20191/20192/110880/24052/20541/17129/20840/240725/21336/21916/435766/21955	45
GO:0097107	BP	GO:0097107	postsynaptic density assembly	9/1811	22/23355	1.9498e-05	0.00063454	0.000509744	14804/16180/18189/18190/18213/19266/19699/210274/217692	9
GO:0010632	BP	GO:0010632	regulation of epithelial cell migration	38/1811	240/23355	1.99298e-05	0.000644823	0.000518005	23797/75723/11600/11881/381290/12927/192197/320924/76707/69601/330662/68813/223650/23871/14026/50754/14389/79221/16002/232227/16398/23938/18704/234779/18750/18754/19270/19274/19279/74030/70097/20346/20356/20317/20563/64074/243362/21336	38
GO:0051146	BP	GO:0051146	striated muscle cell differentiation	47/1811	322/23355	2.01762e-05	0.000649021	0.000521377	210933/11549/11548/238161/225638/12298/73647/12345/12558/12818/13007/13405/227325/14200/225288/108655/56637/208727/79221/26556/16002/74103/330721/18019/50490/54631/18175/211323/19013/19091/218772/19664/20190/24052/20541/17128/319757/69726/20679/70834/20866/66860/21388/21916/21955/106628/278507	47
GO:0008361	BP	GO:0008361	regulation of cell size	35/1811	214/23355	2.07009e-05	0.000662072	0.000531862	23797/11941/12561/213084/239667/244667/13430/12934/13508/13640/320027/56637/16531/16971/17756/71751/17762/269878/17919/211323/18213/18261/243743/380711/74370/319229/20346/108151/20356/20357/214968/20495/20563/21960/22062	35
GO:0019933	BP	GO:0019933	cAMP-mediated signaling	18/1811	78/23355	2.23271e-05	0.000705916	0.000567083	210044/67252/14652/14677/14683/16706/17993/23984/54611/18576/238871/29863/19085/19088/76089/56508/116838/319229	18
GO:0071867	BP	GO:0071867	response to monoamine	17/1811	71/23355	2.24523e-05	0.000705916	0.000567083	238161/11682/381290/13430/14675/14681/14682/14683/14697/15557/66725/18125/18197/18578/238871/19739/20191	17
GO:0071869	BP	GO:0071869	response to catecholamine	17/1811	71/23355	2.24523e-05	0.000705916	0.000567083	238161/11682/381290/13430/14675/14681/14682/14683/14697/15557/66725/18125/18197/18578/238871/19739/20191	17
GO:0008038	BP	GO:0008038	neuron recognition	14/1811	51/23355	2.26109e-05	0.000706907	0.000567879	244682/53870/66797/72832/13508/114873/13844/269878/17967/319504/19876/268902/20346/20356	14
GO:0016055	BP	GO:0016055	Wnt signaling pathway	59/1811	438/23355	2.29456e-05	0.000713366	0.000573068	225638/75723/83675/12505/12558/18647/12614/18163/13132/69601/244667/330938/13607/13853/30838/14183/14682/103978/14773/56637/16348/16646/110648/16971/16973/71268/233328/66725/17342/18099/18230/235542/105787/108079/71461/19277/19273/107746/207181/19664/66743/26563/26564/56505/20356/380702/56274/240725/21415/21844/665113/74493/73668/68889/17847/24117/22419/22422/80707	59
GO:0010977	BP	GO:0010977	negative regulation of neuron projection development	29/1811	164/23355	2.35278e-05	0.000727403	0.000584344	213084/13131/13132/239667/103967/13844/270120/320027/56637/14964/16169/16971/66725/17756/192167/235106/19270/380711/19664/20346/108151/20356/20357/214968/20563/20745/20257/21960/233781	29
GO:0030010	BP	GO:0030010	establishment of cell polarity	27/1811	148/23355	2.5027e-05	0.000765248	0.000614746	225638/75723/192197/214444/76707/170788/94176/67299/270190/20336/14048/209630/232288/56637/16001/83964/269152/16772/17756/93742/72823/241035/18762/71461/76816/74206/338362	27
GO:0071326	BP	GO:0071326	cellular response to monosaccharide stimulus	27/1811	148/23355	2.5027e-05	0.000765248	0.000614746	101772/11814/12289/12290/12638/13640/16001/16847/16971/16973/50490/18189/18504/18575/18576/218461/18795/105787/108079/18754/19275/19276/52055/17128/21844/26950/56490	27
GO:0099172	BP	GO:0099172	presynapse organization	15/1811	58/23355	2.53683e-05	0.000771446	0.000619725	54126/12217/107932/244682/223254/23888/14804/16180/331461/60367/320772/192167/18189/18213/19266	15
GO:0198738	BP	GO:0198738	cell-cell signaling by wnt	59/1811	440/23355	2.62547e-05	0.00079076	0.000635241	225638/75723/83675/12505/12558/18647/12614/18163/13132/69601/244667/330938/13607/13853/30838/14183/14682/103978/14773/56637/16348/16646/110648/16971/16973/71268/233328/66725/17342/18099/18230/235542/105787/108079/71461/19277/19273/107746/207181/19664/66743/26563/26564/56505/20356/380702/56274/240725/21415/21844/665113/74493/73668/68889/17847/24117/22419/22422/80707	59
GO:0018209	BP	GO:0018209	peptidyl-serine modification	51/1811	363/23355	2.62876e-05	0.00079076	0.000635241	100986/23797/11600/381290/227541/12505/215748/70762/13405/67299/13548/268780/13853/271786/108148/56637/56489/231876/66725/71738/71751/328329/667663/329421/18099/18125/18189/18212/18213/238871/227120/224860/105787/18750/18751/18754/18755/18762/20112/74370/170755/69726/72902/80297/20817/64293/57740/56480/23963/228012/69922	51
GO:0043266	BP	GO:0043266	regulation of potassium ion transport	22/1811	109/23355	2.7779e-05	0.00083113	0.000667671	20927/238161/432442/100986/109676/11735/12289/13383/13430/269109/13483/14682/16497/70357/80334/16535/83814/18125/108737/18798/19091/24012	22
GO:0043112	BP	GO:0043112	receptor metabolic process	32/1811	191/23355	2.81928e-05	0.000838999	0.000673992	11600/12306/69710/99371/12300/54377/12491/13132/13405/13430/103967/14272/53618/14799/269994/232227/16558/68421/231876/50791/211323/93742/234779/19165/217835/102141/20660/64009/104015/72238/69727/78610	32
GO:0042472	BP	GO:0042472	inner ear morphogenesis	23/1811	117/23355	2.8738e-05	0.000850676	0.000683373	109934/11941/50769/22295/12614/13844/14048/14183/14633/241226/320398/667663/329421/21906/18504/11994/102502/71461/26564/109205/22095/72747/21417	23
GO:1901379	BP	GO:1901379	regulation of potassium ion transmembrane transport	19/1811	87/23355	3.05804e-05	0.000900422	0.000723336	20927/238161/432442/100986/109676/11735/12289/13383/13430/269109/13483/16497/70357/80334/16535/83814/108737/19091/24012	19
GO:0048839	BP	GO:0048839	inner ear development	35/1811	218/23355	3.09098e-05	0.000905332	0.00072728	109934/110789/11941/50769/22295/12614/13844/14048/14183/14402/14633/433899/241226/16531/16535/108030/320398/171166/667663/329421/21906/18504/11994/102502/71461/19664/26563/26564/109205/13409/109181/22095/72747/22283/21417	35
GO:0006904	BP	GO:0006904	vesicle docking involved in exocytosis	13/1811	46/23355	3.14549e-05	0.000909826	0.00073089	12638/20336/17967/18189/67295/235442/116837/116838/212986/20908/208898/77573/22365	13
GO:0098900	BP	GO:0098900	regulation of action potential	15/1811	59/23355	3.15971e-05	0.000909826	0.00073089	11549/109676/11735/12288/12491/216033/13383/14167/108655/15165/70357/18216/56508/20191/21336	15
GO:0045055	BP	GO:0045055	regulated exocytosis	40/1811	263/23355	3.16791e-05	0.000909826	0.00073089	109934/11549/319924/11784/12286/12288/12298/27062/320405/27278/320127/67753/111173/238988/14158/14389/242443/108073/14823/56637/16510/66725/17096/192167/18191/327814/18750/18751/18754/52055/56508/116837/116838/20908/78808/207227/104015/20980/60510/208898	40
GO:0003015	BP	GO:0003015	heart process	37/1811	236/23355	3.17172e-05	0.000909826	0.00073089	11549/11548/238161/109676/381290/12288/12289/12290/216033/13383/13405/14360/14652/14681/208727/140492/16535/26399/83814/18125/50490/18578/238871/242202/18750/19091/19165/20112/20191/20346/24052/244431/20541/17129/80297/21834/435766	37
GO:0055001	BP	GO:0055001	muscle cell development	34/1811	210/23355	3.34124e-05	0.000953537	0.000766004	11549/11548/238161/225638/109676/12298/73647/12345/12818/13007/13405/227325/14200/225288/108655/56637/208727/79221/26556/74103/18019/18175/19013/19091/20190/24052/20541/17128/319757/69726/21916/21955/106628/278507	34
GO:0046058	BP	GO:0046058	cAMP metabolic process	7/1811	14/23355	3.51244e-05	0.000997283	0.000801146	271639/210044/104111/11513/11515/12298/238871	7
GO:0071902	BP	GO:0071902	positive regulation of protein serine/threonine kinase activity	41/1811	274/23355	3.72889e-05	0.00105337	0.000846199	14081/238161/11682/381290/13132/69601/14254/404194/14816/108071/76527/29875/16706/66725/17002/99470/23938/26399/71751/26407/338372/26390/50490/18189/18213/242202/74055/76089/19876/26564/74370/70097/70834/330177/21676/23963/21844/21943/665113/22062/22422	41
GO:0098698	BP	GO:0098698	postsynaptic specialization assembly	10/1811	29/23355	3.89588e-05	0.00108948	0.000875208	14804/16180/192167/18189/18190/18213/19266/19699/210274/217692	10
GO:1904861	BP	GO:1904861	excitatory synapse assembly	10/1811	29/23355	3.89588e-05	0.00108948	0.000875208	14804/16180/192167/18189/18190/18213/19266/19699/210274/217692	10
GO:0055117	BP	GO:0055117	regulation of cardiac muscle contraction	16/1811	67/23355	4.01873e-05	0.00111821	0.000898291	11549/11548/238161/109676/12288/216033/13383/13405/208727/16535/18578/238871/242202/20191/20541/435766	16
GO:0001941	BP	GO:0001941	postsynaptic membrane organization	13/1811	47/23355	4.04148e-05	0.00111895	0.000898882	12558/13844/14658/268566/243499/50791/192167/18189/18190/19699/380702/26570/20411	13
GO:0006470	BP	GO:0006470	protein dephosphorylation	37/1811	239/23355	4.18976e-05	0.00115426	0.000927248	100072/76469/50768/240672/13853/14048/14049/76429/50791/107895/74302/98432/320472/319468/242083/228852/72930/269643/235542/26932/243819/71474/19248/19250/545622/19258/19263/19266/19270/19274/19275/19276/19277/19279/19281/19273/68188	37
GO:0060079	BP	GO:0060079	excitatory postsynaptic potential	19/1811	89/23355	4.27146e-05	0.0011685	0.00093869	20238/13048/320127/14804/14805/14811/14812/56637/66725/192167/18189/243725/18762/19699/116837/116838/210274/64009/81907	19
GO:1905475	BP	GO:1905475	regulation of protein localization to membrane	32/1811	195/23355	4.2884e-05	0.0011685	0.00093869	11735/381290/74741/12300/12558/13132/13383/269109/13483/13844/13853/14360/103978/23888/56637/545156/16971/50791/17919/18189/59020/98496/102502/18762/56508/380702/26570/20411/20840/20908/55943/665113	32
GO:0021884	BP	GO:0021884	forebrain neuron development	11/1811	35/23355	4.30445e-05	0.0011685	0.00093869	70762/244667/14183/14682/76089/19876/268902/20346/94229/20563/328365	11
GO:1901890	BP	GO:1901890	positive regulation of cell junction assembly	23/1811	120/23355	4.36895e-05	0.00118025	0.000948132	210933/319387/11418/13048/13631/13640/270190/13844/14260/14804/56637/16180/331461/29875/242384/243499/192167/18189/18212/18213/18750/19266/29819	23
GO:0072578	BP	GO:0072578	neurotransmitter-gated ion channel clustering	8/1811	19/23355	4.47098e-05	0.00120198	0.000965585	14658/268566/243499/192167/18189/19699/380702/26570	8
GO:0060998	BP	GO:0060998	regulation of dendritic spine development	18/1811	82/23355	4.56355e-05	0.00122097	0.000980841	13196/13048/244667/103967/13631/320027/16443/545156/192167/211323/74143/327814/243725/19699/330222/210274/29819/21844	18
GO:0035725	BP	GO:0035725	sodium ion transmembrane transport	26/1811	145/23355	4.76247e-05	0.00126205	0.00101384	11735/11418/241118/381290/215748/13405/13430/14167/14169/15165/94253/338370/83814/18125/18795/545622/110880/20273/20495/94249/54403/229706/104245/20541/226999/236727	26
GO:0071333	BP	GO:0071333	cellular response to glucose stimulus	26/1811	145/23355	4.76247e-05	0.00126205	0.00101384	101772/11814/12289/12290/12638/13640/16001/16847/16971/16973/50490/18189/18504/18575/18576/218461/105787/108079/18754/19275/19276/52055/17128/21844/26950/56490	26
GO:0048640	BP	GO:0048640	negative regulation of developmental growth	24/1811	129/23355	4.97892e-05	0.00131316	0.0010549	213084/239667/108655/320027/14683/56637/16468/16526/17756/19013/19206/20346/108151/20356/20357/214968/20563/70834/56274/21388/24087/21960/22062/52357	24
GO:0014910	BP	GO:0014910	regulation of smooth muscle cell migration	19/1811	90/23355	5.0255e-05	0.00131919	0.00105975	238130/68813/67299/208727/29875/16398/16971/50490/233571/18552/19017/19091/56508/19664/214968/20563/319757/20660/21336	19
GO:1903169	BP	GO:1903169	regulation of calcium ion transmembrane transport	29/1811	171/23355	5.2186e-05	0.00136345	0.0010953	238161/109676/12286/12288/12289/12298/13367/13405/14169/14360/14697/16867/17096/70729/319239/18216/233571/18578/238871/234779/18754/19165/19739/20191/20541/20840/20866/116873/13409	29
GO:0021952	BP	GO:0021952	central nervous system projection neuron axonogenesis	10/1811	30/23355	5.43906e-05	0.00141441	0.00113624	110532/12552/13176/270190/13844/14633/243743/20563/80297/230676	10
GO:0019935	BP	GO:0019935	cyclic-nucleotide-mediated signaling	21/1811	106/23355	5.5846e-05	0.00144441	0.00116034	210044/67252/12491/14652/14677/14683/16706/17993/23984/54611/18576/238871/29863/18585/19085/19088/19091/76089/56508/116838/319229	21
GO:0099084	BP	GO:0099084	postsynaptic specialization organization	12/1811	42/23355	5.60633e-05	0.00144441	0.00116034	12558/14804/16180/192167/18189/18190/18213/19266/19699/210274/217692/81907	12
GO:0071331	BP	GO:0071331	cellular response to hexose stimulus	26/1811	147/23355	6.05376e-05	0.0015525	0.00124717	101772/11814/12289/12290/12638/13640/16001/16847/16971/16973/50490/18189/18504/18575/18576/218461/105787/108079/18754/19275/19276/52055/17128/21844/26950/56490	26
GO:0098917	BP	GO:0098917	retrograde trans-synaptic signaling	7/1811	15/23355	6.14419e-05	0.00156774	0.00125941	66082/269060/223254/192167/18125/18795/23964	7
GO:0001678	BP	GO:0001678	cellular glucose homeostasis	28/1811	164/23355	6.16953e-05	0.00156774	0.00125941	20927/101772/11814/12289/12290/12638/13640/17425/16001/16847/16971/16973/50490/18189/18504/18575/18576/218461/105787/108079/18754/19275/19276/52055/17128/21844/26950/56490	28
GO:0014909	BP	GO:0014909	smooth muscle cell migration	20/1811	99/23355	6.23807e-05	0.00157795	0.00126761	238130/68813/67299/208727/29875/16398/545156/16971/50490/233571/18552/19017/19091/56508/19664/214968/20563/319757/20660/21336	20
GO:1904375	BP	GO:1904375	regulation of protein localization to cell periphery	25/1811	139/23355	6.26899e-05	0.00157859	0.00126813	381290/12300/13132/13383/269109/13483/13844/13853/14677/23888/56637/545156/16971/50791/17919/18189/98496/102502/18762/56508/20411/20840/20908/55943/665113	25
GO:0048017	BP	GO:0048017	inositol lipid-mediated signaling	29/1811	173/23355	6.48202e-05	0.00162488	0.00130532	11600/12359/69601/13869/14254/14360/14389/16001/16510/244281/268857/211323/18212/18213/380698/224020/18704/18705/18795/18798/74055/227120/224860/18805/228852/19699/26563/26564/104015	29
GO:0060047	BP	GO:0060047	heart contraction	35/1811	226/23355	6.61508e-05	0.00164828	0.00132411	11549/11548/238161/109676/381290/12288/12289/12290/216033/13383/13405/14652/14681/208727/140492/16535/26399/83814/18125/18578/238871/242202/18750/19091/19165/20112/20191/20346/24052/244431/20541/17129/80297/21834/435766	35
GO:0030111	BP	GO:0030111	regulation of Wnt signaling pathway	44/1811	309/23355	6.63457e-05	0.00164828	0.00132411	225638/83675/12558/18647/18163/13132/69601/244667/330938/13607/14183/14682/103978/56637/16348/16646/110648/16971/233328/66725/18099/18230/235542/71461/19277/19273/107746/207181/19664/66743/26564/56505/20356/380702/56274/240725/21844/74493/73668/68889/17847/24117/22419/80707	44
GO:0009914	BP	GO:0009914	hormone transport	51/1811	376/23355	6.67786e-05	0.00165166	0.00132682	18671/20927/101772/54126/12288/12289/12290/12638/12753/12894/13132/13640/14652/14683/15378/15893/16443/545156/16535/16847/16971/14725/16973/17096/245049/54003/18125/18189/18575/18576/218461/18754/19275/19276/52055/235442/56508/19726/116838/74370/12394/20394/20502/50934/17128/207227/60510/21336/21844/21943/26950	51
GO:0097104	BP	GO:0097104	postsynaptic membrane assembly	6/1811	11/23355	7.08154e-05	0.00174375	0.00140081	12558/13844/50791/192167/18189/18190	6
GO:0097479	BP	GO:0097479	synaptic vesicle localization	15/1811	63/23355	7.20294e-05	0.00176583	0.00141854	12558/13430/103967/12934/14183/16572/108030/66725/50791/17756/192167/18189/214585/27204/104015	15
GO:0055074	BP	GO:0055074	calcium ion homeostasis	63/1811	496/23355	7.3567e-05	0.00179562	0.00144247	11549/11548/238161/109676/224079/11941/381290/12286/12288/12298/12308/12491/22295/13367/244667/13405/13982/270028/14360/14652/14683/14811/14812/14816/234515/16438/16439/16510/16867/16971/17096/216001/18125/319239/18216/233571/238871/241035/234779/18750/18751/18754/19091/19165/229877/20190/20191/20192/24052/76775/94249/20541/20866/116873/21336/240174/278279/21943/22045/22066/26946/17364/56491	63
GO:0060401	BP	GO:0060401	cytosolic calcium ion transport	30/1811	183/23355	7.4709e-05	0.00180823	0.00145261	11549/238161/109676/12288/13367/13405/270028/14360/14652/14811/14812/16438/16439/16867/17096/216001/319239/18216/74143/233571/238871/234779/18754/19165/19739/20190/20191/20192/20541/17364	30
GO:1902473	BP	GO:1902473	regulation of protein localization to synapse	10/1811	31/23355	7.47339e-05	0.00180823	0.00145261	13383/23888/56637/545156/50791/17762/192167/18762/56508/665113	10
GO:0048846	BP	GO:0048846	axon extension involved in axon guidance	11/1811	37/23355	7.63388e-05	0.00182328	0.0014647	13508/269878/243743/20346/108151/20356/20357/214968/20563/20564/319757	11
GO:0071709	BP	GO:0071709	membrane assembly	11/1811	37/23355	7.63388e-05	0.00182328	0.0014647	11735/12306/12558/13844/331461/50791/192167/18189/18190/19266/76438	11
GO:1902284	BP	GO:1902284	neuron projection extension involved in neuron projection guidance	11/1811	37/23355	7.63388e-05	0.00182328	0.0014647	13508/269878/243743/20346/108151/20356/20357/214968/20563/20564/319757	11
GO:0043406	BP	GO:0043406	positive regulation of MAP kinase activity	33/1811	210/23355	7.89989e-05	0.00187876	0.00150926	11682/13132/69601/14254/404194/14816/108071/76527/29875/16706/66725/99470/23938/26399/71751/26407/338372/26390/50490/18213/242202/74055/19876/26564/70097/70834/330177/23963/21844/21943/665113/22062/22422	33
GO:0030032	BP	GO:0030032	lamellipodium assembly	16/1811	71/23355	8.51818e-05	0.00201718	0.00162046	226251/54126/319974/12345/12554/13430/14158/208727/74055/19277/20563/219140/14270/22325/57257/245880	16
GO:0001667	BP	GO:0001667	ameboidal-type cell migration	57/1811	439/23355	8.77031e-05	0.00206808	0.00166135	23797/75723/11600/11881/381290/12927/192197/320924/12554/12558/76707/69601/330662/68813/223650/13869/23871/14026/50754/14158/14389/79221/16002/29875/232227/16398/380664/16973/23938/269878/55982/18613/18704/234779/18750/18754/19270/19274/19279/74030/19876/70097/30953/20346/108151/20356/20357/214968/20317/20541/20563/319757/64074/14270/243362/21336/21961	57
GO:0007254	BP	GO:0007254	JNK cascade	29/1811	176/23355	8.8968e-05	0.00208906	0.0016782	108909/13132/69601/330938/270190/14167/14169/16001/99470/71751/26409/338372/26414/26390/14013/54631/98432/18795/107746/26564/59009/70834/56274/330177/21943/665113/22062/209012/22422	29
GO:0016082	BP	GO:0016082	synaptic vesicle priming	9/1811	26/23355	9.21378e-05	0.00214404	0.00172237	27062/320405/111173/238988/116837/116838/78808/104015/208898	9
GO:0046339	BP	GO:0046339	diacylglycerol metabolic process	9/1811	26/23355	9.21378e-05	0.00214404	0.00172237	269060/217480/110197/380921/320127/68393/665270/74055/19012	9
GO:0044091	BP	GO:0044091	membrane biogenesis	12/1811	44/23355	9.24653e-05	0.00214404	0.00172237	11735/12306/12558/13844/20336/331461/50791/192167/18189/18190/19266/76438	12
GO:0010631	BP	GO:0010631	epithelial cell migration	43/1811	304/23355	9.31633e-05	0.00215126	0.00172817	23797/75723/11600/11881/381290/12927/192197/320924/12554/76707/69601/330662/68813/223650/23871/14026/50754/14389/79221/16002/232227/16398/380664/23938/55982/18613/18704/234779/18750/18754/19270/19274/19279/74030/19876/70097/20346/20356/20317/20563/64074/243362/21336	43
GO:0110053	BP	GO:0110053	regulation of actin filament organization	40/1811	276/23355	9.45488e-05	0.00217423	0.00174662	242894/69710/73910/11856/72754/230837/66898/12345/68178/76707/235431/12386/50768/13383/14026/14158/225288/14260/544963/57748/77569/50490/54631/18613/208177/213556/320472/243725/277360/18754/20356/110380/20563/66616/74392/118449/21336/23963/21916/245880	40
GO:0006638	BP	GO:0006638	neutral lipid metabolic process	25/1811	143/23355	0.000100968	0.00228311	0.00183409	381072/76192/66082/14081/11813/11814/12359/12491/264064/12894/269060/217480/110197/380921/320127/13982/15450/14245/68393/665270/74055/19012/18947/20660/21834	25
GO:0030326	BP	GO:0030326	embryonic limb morphogenesis	25/1811	143/23355	0.000100968	0.00228311	0.00183409	16764/12288/110350/30838/231470/14633/14682/14683/106633/245866/380614/56873/16917/16973/14013/269878/18514/19165/19206/218772/26564/12393/17128/21388/213081	25
GO:0035113	BP	GO:0035113	embryonic appendage morphogenesis	25/1811	143/23355	0.000100968	0.00228311	0.00183409	16764/12288/110350/30838/231470/14633/14682/14683/106633/245866/380614/56873/16917/16973/14013/269878/18514/19165/19206/218772/26564/12393/17128/21388/213081	25
GO:0043583	BP	GO:0043583	ear development	37/1811	249/23355	0.000100998	0.00228311	0.00183409	109934/110789/11941/50769/22295/12614/13844/14048/14183/14402/14633/433899/241226/16531/16535/108030/320398/171166/667663/329421/21906/18504/11994/102502/71461/19664/26563/26564/110380/109205/13409/109181/22095/72747/22283/213081/21417	37
GO:0098696	BP	GO:0098696	regulation of neurotransmitter receptor localization to postsynaptic specialization membrane	7/1811	16/23355	0.000101914	0.00228311	0.00183409	23888/56637/545156/50791/18762/56508/665113	7
GO:0090311	BP	GO:0090311	regulation of protein deacetylation	13/1811	51/23355	0.000102155	0.00228311	0.00183409	80748/12053/107392/13548/14272/320365/81703/14245/66725/17762/20602/105787/108079	13
GO:0099054	BP	GO:0099054	presynapse assembly	13/1811	51/23355	0.000102155	0.00228311	0.00183409	12217/244682/223254/23888/14804/16180/331461/60367/320772/192167/18189/18213/19266	13
GO:0031290	BP	GO:0031290	retinal ganglion cell axon guidance	8/1811	21/23355	0.000104581	0.00232796	0.00187012	13640/270190/13844/319504/18261/19274/268902/20563	8
GO:0043405	BP	GO:0043405	regulation of MAP kinase activity	41/1811	287/23355	0.000107515	0.00238376	0.00191494	108909/11682/13132/69601/240672/13844/14254/404194/14816/108071/56637/16001/76527/29875/16706/66725/17096/99470/23938/26399/71751/26407/338372/26390/50490/18213/242202/74055/18750/19876/26564/70097/20660/70834/330177/23963/21844/21943/665113/22062/22422	41
GO:0090132	BP	GO:0090132	epithelium migration	43/1811	306/23355	0.000108322	0.00239211	0.00192165	23797/75723/11600/11881/381290/12927/192197/320924/12554/76707/69601/330662/68813/223650/23871/14026/50754/14389/79221/16002/232227/16398/380664/23938/55982/18613/18704/234779/18750/18754/19270/19274/19279/74030/19876/70097/20346/20356/20317/20563/64074/243362/21336	43
GO:1903305	BP	GO:1903305	regulation of regulated secretory pathway	29/1811	178/23355	0.000109274	0.00240359	0.00193087	109934/11549/319924/11784/12286/12298/27062/320127/14158/14389/242443/108073/14823/56637/16510/66725/17096/192167/18191/327814/18750/18751/18754/116837/116838/78808/207227/20980/60510	29
GO:0014706	BP	GO:0014706	striated muscle tissue development	58/1811	453/23355	0.000112294	0.00246031	0.00197644	11549/11548/238161/225638/11600/12818/12823/13405/227325/270190/13869/14048/14049/14183/14200/225288/14236/108655/56637/208727/79221/16656/26556/16002/16468/16526/380664/14725/71960/17967/74103/50490/54631/18175/211323/18509/22634/19013/105787/19091/218772/268859/19664/20190/20191/24052/244431/20541/17128/319757/20679/21388/23966/24087/106628/22062/241431/22762	58
GO:0009743	BP	GO:0009743	response to carbohydrate	32/1811	205/23355	0.000114349	0.00247607	0.0019891	101772/11814/12289/12290/12638/13640/14652/15378/16001/16847/16971/16973/50490/18189/18504/18575/18576/218461/18795/105787/108079/18750/18751/18754/19275/19276/52055/20112/17128/21844/26950/56490	32
GO:0048736	BP	GO:0048736	appendage development	32/1811	205/23355	0.000114349	0.00247607	0.0019891	16764/12288/110350/30838/14183/14260/231470/14633/14682/14683/15932/106633/245866/380614/56873/16917/16973/14013/269878/18514/18552/18845/19165/19206/218772/26564/12393/70661/26570/17128/21388/213081	32
GO:0060173	BP	GO:0060173	limb development	32/1811	205/23355	0.000114349	0.00247607	0.0019891	16764/12288/110350/30838/14183/14260/231470/14633/14682/14683/15932/106633/245866/380614/56873/16917/16973/14013/269878/18514/18552/18845/19165/19206/218772/26564/12393/70661/26570/17128/21388/213081	32
GO:0048015	BP	GO:0048015	phosphatidylinositol-mediated signaling	28/1811	170/23355	0.000117523	0.00253495	0.0020364	11600/12359/69601/13869/14254/14360/14389/16001/16510/244281/268857/211323/18212/18213/380698/224020/18704/18705/18795/18798/74055/227120/224860/228852/19699/26563/26564/104015	28
GO:0003279	BP	GO:0003279	cardiac septum development	23/1811	128/23355	0.000122888	0.00264043	0.00212113	108154/13411/13430/14183/16971/14725/268977/18018/18552/71461/218772/19664/19876/268902/20563/20564/17128/319757/24069/21388/109181/241431/22762	23
GO:0008154	BP	GO:0008154	actin polymerization or depolymerization	33/1811	215/23355	0.000125439	0.00267978	0.00215275	11308/242894/73910/66898/12345/12808/12386/13367/56419/13383/14026/14158/225288/14260/544963/57748/194401/54631/18613/213556/243725/277360/18754/19201/20356/110380/20563/66616/74392/23963/21916/74569/245880	33
GO:0090130	BP	GO:0090130	tissue migration	43/1811	308/23355	0.000125682	0.00267978	0.00215275	23797/75723/11600/11881/381290/12927/192197/320924/12554/76707/69601/330662/68813/223650/23871/14026/50754/14389/79221/16002/232227/16398/380664/23938/55982/18613/18704/234779/18750/18754/19270/19274/19279/74030/19876/70097/20346/20356/20317/20563/64074/243362/21336	43
GO:0018105	BP	GO:0018105	peptidyl-serine phosphorylation	46/1811	337/23355	0.000127788	0.00271429	0.00218046	100986/23797/11600/381290/227541/12505/215748/70762/13405/67299/13548/13853/56637/56489/231876/66725/71751/328329/667663/329421/18099/18125/18189/18212/18213/238871/227120/224860/105787/18750/18751/18754/18755/18762/20112/74370/170755/69726/80297/20817/64293/57740/56480/23963/228012/69922	46
GO:0001954	BP	GO:0001954	positive regulation of cell-matrix adhesion	14/1811	59/23355	0.000129305	0.00272569	0.00218963	12491/12554/12571/244667/13405/14260/56637/29875/18552/83436/18762/74030/78473/22288	14
GO:0007528	BP	GO:0007528	neuromuscular junction development	14/1811	59/23355	0.000129305	0.00272569	0.00218963	12298/12300/14183/268566/56637/545156/66725/18212/55983/67533/210274/20411/208898/22288	14
GO:0060013	BP	GO:0060013	righting reflex	6/1811	12/23355	0.000132316	0.00277863	0.00223215	319974/22295/14658/319239/11994/69727	6
GO:0044782	BP	GO:0044782	cilium organization	48/1811	357/23355	0.000133369	0.00279021	0.00224146	76967/226251/68146/213402/13196/100503572/319845/71276/382090/214552/226356/100048534/74453/380654/244667/13417/13430/110350/226265/239789/244653/106633/245866/380614/75050/16579/102747/232944/18004/11994/241035/19726/77945/76816/26942/66722/74362/320277/64009/329795/74569/73668/72747/320244/239591/209012/213081/94187	48
GO:0060048	BP	GO:0060048	cardiac muscle contraction	23/1811	129/23355	0.000138749	0.0028919	0.00232315	11549/11548/238161/109676/12288/12289/216033/13383/13405/208727/140492/16535/26399/83814/18578/238871/242202/19165/20191/24052/20541/17129/435766	23
GO:0097581	BP	GO:0097581	lamellipodium organization	18/1811	89/23355	0.000140559	0.0029187	0.00234467	11308/226251/54126/319974/12345/12505/12554/13430/14158/208727/74055/19277/20563/219140/14270/22325/57257/245880	18
GO:0046879	BP	GO:0046879	hormone secretion	49/1811	368/23355	0.00014495	0.00299805	0.00240842	20927/101772/54126/12288/12289/12290/12638/12753/12894/13132/13640/14652/14683/15378/15893/16443/545156/16535/16847/16971/14725/16973/17096/245049/54003/18125/18189/18575/18576/218461/18754/19275/19276/52055/235442/56508/19726/116838/74370/12394/20394/20502/17128/207227/60510/21336/21844/21943/26950	49
GO:0014812	BP	GO:0014812	muscle cell migration	21/1811	113/23355	0.00014587	0.00299805	0.00240842	238130/68813/67299/208727/29875/16398/545156/16971/56349/50490/233571/18552/19017/19091/56508/19664/214968/20563/319757/20660/21336	21
GO:0010959	BP	GO:0010959	regulation of metal ion transport	41/1811	291/23355	0.000145997	0.00299805	0.00240842	238161/109676/11941/24115/12286/12288/12289/12298/13367/13383/13405/14169/14360/14652/14681/14697/26556/16438/16867/17096/107589/18125/70729/319239/18216/233571/18578/238871/18704/234779/381925/18754/19165/19739/20191/20541/20840/20866/116873/13409/22066	41
GO:0042471	BP	GO:0042471	ear morphogenesis	24/1811	138/23355	0.000149674	0.00306227	0.00246001	109934/11941/50769/22295/12614/13844/14048/14183/14633/241226/320398/667663/329421/21906/18504/11994/102502/71461/26564/109205/22095/72747/213081/21417	24
GO:0042593	BP	GO:0042593	glucose homeostasis	39/1811	273/23355	0.000156263	0.00318536	0.00255889	20927/11548/101772/11814/12286/12288/12289/12290/12491/12638/94109/13640/14118/17425/15378/16001/16847/16971/16973/109241/20602/50490/18189/18504/18575/18576/218461/105787/108079/18754/19206/19275/19276/52055/17128/207227/21844/26950/56490	39
GO:0006814	BP	GO:0006814	sodium ion transport	35/1811	236/23355	0.000159438	0.00323822	0.00260136	23797/11735/11418/241118/381290/76856/215748/13405/13430/14167/14169/14683/15165/94253/338370/83814/432450/269513/18125/18795/545622/110880/20273/76775/20495/114644/94249/94229/54403/229706/104245/20541/226999/236727/80297	35
GO:0001558	BP	GO:0001558	regulation of cell growth	56/1811	439/23355	0.000161017	0.0032584	0.00261757	238161/11787/12053/12505/12561/213084/68755/12818/13132/69601/239667/244667/13430/12934/13508/13640/18605/13823/13853/17425/108655/320027/56637/15378/30841/110648/16971/17756/23938/71751/17762/269878/17919/83814/211323/18213/18261/243743/19013/116837/116838/19886/74370/20346/108151/20356/20357/214968/58172/20563/20564/17128/70834/20980/21960/106628	56
GO:0043502	BP	GO:0043502	regulation of muscle adaptation	19/1811	98/23355	0.000167092	0.00336908	0.00270648	11549/238161/381290/76469/108655/56637/57080/208727/16468/17993/18018/242202/18585/19013/18750/17128/21676/21955/106628	19
GO:0007389	BP	GO:0007389	pattern specification process	60/1811	480/23355	0.000167726	0.00336966	0.00270695	11308/108909/11764/68146/83675/207165/12590/12614/74453/12808/68897/13411/110350/13869/23872/14048/14183/14633/106633/245866/380614/16348/30841/16917/14725/16973/26407/320772/269878/17536/18183/18504/18509/18514/18552/171395/18845/235542/19165/19206/19664/19699/19726/66743/19876/268902/26564/20346/27428/17128/66993/319757/24069/21388/21415/329795/73668/213081/22422/21417	60
GO:0033500	BP	GO:0033500	carbohydrate homeostasis	39/1811	274/23355	0.000168842	0.00337988	0.00271516	20927/11548/101772/11814/12286/12288/12289/12290/12491/12638/94109/13640/14118/17425/15378/16001/16847/16971/16973/109241/20602/50490/18189/18504/18575/18576/218461/105787/108079/18754/19206/19275/19276/52055/17128/207227/21844/26950/56490	39
GO:0030100	BP	GO:0030100	regulation of endocytosis	34/1811	228/23355	0.000176477	0.00349986	0.00281154	269774/60595/11600/12306/11813/71435/224671/12491/12554/13132/13430/13631/269994/232227/16398/16443/16971/14725/66725/50791/78771/83814/192167/93742/234779/18750/217835/100502698/73094/108800/64009/104015/72238/69727	34
GO:0010738	BP	GO:0010738	regulation of protein kinase A signaling	9/1811	28/23355	0.000176722	0.00349986	0.00281154	110789/238161/432442/14812/66725/18189/23984/19085/19088	9
GO:2000310	BP	GO:2000310	regulation of NMDA receptor activity	9/1811	28/23355	0.000176722	0.00349986	0.00281154	69635/13844/14811/192167/18189/19017/19417/19699/19739	9
GO:1905606	BP	GO:1905606	regulation of presynapse assembly	10/1811	34/23355	0.000178237	0.00351734	0.00282558	223254/23888/14804/16180/331461/60367/320772/192167/18189/18213	10
GO:0006942	BP	GO:0006942	regulation of striated muscle contraction	17/1811	83/23355	0.000181488	0.00355628	0.00285686	11549/11548/238161/109676/12288/216033/13383/13405/208727/16535/18578/238871/242202/20191/110880/20541/435766	17
GO:0050805	BP	GO:0050805	negative regulation of synaptic transmission	17/1811	83/23355	0.000181488	0.00355628	0.00285686	66082/320127/14677/14799/14804/14805/14807/66725/17762/243725/56508/210274/81840/66673/29819/64009/21960	17
GO:0009101	BP	GO:0009101	glycoprotein biosynthetic process	39/1811	275/23355	0.000182326	0.00356015	0.00285998	333424/66789/26877/93961/14595/71367/338337/233824/234356/53618/14348/231050/271786/233733/108148/108150/270049/319415/50787/15450/67569/107895/83398/69352/18795/235534/170441/94229/20441/20447/26938/20449/241230/387314/278279/109181/80286/268880/233781	39
GO:0006937	BP	GO:0006937	regulation of muscle contraction	26/1811	157/23355	0.000184933	0.00359844	0.00289073	11549/11548/238161/109676/12288/216033/13383/13405/238130/68813/208727/16398/16531/16535/18578/238871/242202/18750/19091/20190/20191/110880/20541/21336/435766/21955	26
GO:0097553	BP	GO:0097553	calcium ion transmembrane import into cytosol	24/1811	140/23355	0.000187906	0.00364354	0.00292696	238161/109676/12288/13367/13405/270028/14360/14652/14811/14812/16438/16439/16867/17096/319239/18216/233571/238871/234779/18754/20190/20191/20192/20541	24
GO:1901016	BP	GO:1901016	regulation of potassium ion transmembrane transporter activity	14/1811	61/23355	0.00018908	0.00365358	0.00293502	20927/238161/432442/100986/109676/11735/12289/13383/13430/16497/16535/83814/108737/19091	14
GO:0150115	BP	GO:0150115	cell-substrate junction organization	19/1811	99/23355	0.000191961	0.00369019	0.00296444	11856/192197/76707/235431/50768/13518/13640/14260/29875/232227/16398/16774/77569/16971/244895/208177/235442/20411/21961	19
GO:0045785	BP	GO:0045785	positive regulation of cell adhesion	56/1811	442/23355	0.000192301	0.00369019	0.00296444	11492/11600/11735/12053/108723/12400/12491/12505/12554/12571/140709/13132/244667/13405/13430/330662/68813/13612/268780/23871/14260/751864/56637/54167/16002/29875/16398/269152/16579/14924/18003/56349/18073/67050/18552/58205/83436/27205/277360/18750/18754/18762/19273/74030/20163/12394/230126/668101/78473/64074/20908/21943/22288/57257/11906/328365	56
GO:0061351	BP	GO:0061351	neural precursor cell proliferation	30/1811	193/23355	0.000198557	0.00378643	0.00304175	12558/269060/244667/330938/67299/68519/270190/14183/14633/320191/30841/14725/66725/17096/17279/20602/107746/218772/68703/19883/77945/20163/20502/66993/319757/20678/320165/57752/22422/94187	30
GO:0060271	BP	GO:0060271	cilium assembly	44/1811	324/23355	0.000198677	0.00378643	0.00304175	76967/226251/68146/213402/13196/100503572/319845/71276/382090/214552/226356/100048534/74453/380654/244667/13417/13430/110350/239789/244653/106633/245866/380614/75050/102747/232944/18004/11994/241035/19726/77945/76816/26942/66722/74362/320277/64009/329795/72747/320244/239591/209012/213081/94187	44
GO:0006639	BP	GO:0006639	acylglycerol metabolic process	24/1811	141/23355	0.000210082	0.00399012	0.00320538	76192/66082/14081/11813/11814/12359/12491/264064/12894/269060/217480/110197/380921/320127/13982/15450/14245/68393/665270/74055/19012/18947/20660/21834	24
GO:0010769	BP	GO:0010769	regulation of cell morphogenesis involved in differentiation	21/1811	116/23355	0.000213507	0.00404137	0.00324655	60595/12927/213084/13048/13132/13430/330662/68813/13631/13640/331461/545156/17919/18003/56349/74143/277360/19266/19699/29819/21844	21
GO:0042490	BP	GO:0042490	mechanoreceptor differentiation	18/1811	92/23355	0.000217978	0.00410342	0.00329639	110789/11941/22295/14402/433899/16531/171166/667663/329421/18212/18213/11994/102502/19664/13409/109181/22095/22283	18
GO:0034446	BP	GO:0034446	substrate adhesion-dependent cell spreading	20/1811	108/23355	0.000218259	0.00410342	0.00329639	60595/69538/226255/12927/13132/13430/330662/68813/13640/14158/72007/241226/230316/18003/56349/80883/244895/277360/14270/22283	20
GO:0060828	BP	GO:0060828	regulation of canonical Wnt signaling pathway	35/1811	240/23355	0.000222042	0.00416049	0.00334224	83675/12558/18647/18163/13132/69601/244667/13607/14183/14682/103978/56637/16348/16646/110648/233328/66725/235542/71461/19277/19273/107746/207181/19664/66743/26564/56505/20356/380702/56274/74493/73668/68889/17847/22419	35
GO:0071559	BP	GO:0071559	response to transforming growth factor beta	33/1811	222/23355	0.000231504	0.00431379	0.0034654	12683/12827/13132/13430/14118/53618/14360/16001/241226/16420/52662/380664/268977/26409/18099/19013/19017/70673/12394/170441/17128/17129/102141/20678/20679/14479/278507/80707/22612/21417/11906/230597/328365	33
GO:0045773	BP	GO:0045773	positive regulation of axon extension	13/1811	55/23355	0.00023255	0.00431379	0.0034654	12561/244667/13508/56637/16971/71751/17762/269878/17919/211323/18213/18261/20356	13
GO:0061001	BP	GO:0061001	regulation of dendritic spine morphogenesis	13/1811	55/23355	0.00023255	0.00431379	0.0034654	13048/103967/13631/545156/66725/192167/74143/327814/243725/19699/217692/29819/21844	13
GO:0045761	BP	GO:0045761	regulation of adenylate cyclase activity	9/1811	29/23355	0.000238716	0.00439886	0.00353373	110789/238161/100986/12288/12289/67252/14708/20866/21858	9
GO:0090312	BP	GO:0090312	positive regulation of protein deacetylation	9/1811	29/23355	0.000238716	0.00439886	0.00353373	80748/12053/107392/13548/14272/81703/14245/66725/20602	9
GO:0022406	BP	GO:0022406	membrane docking	17/1811	85/23355	0.00024533	0.00450581	0.00361965	12638/20336/17967/18189/19165/67295/19349/235442/116837/116838/212986/20908/55943/208898/56491/77573/22365	17
GO:0009582	BP	GO:0009582	detection of abiotic stimulus	23/1811	134/23355	0.000248503	0.00454908	0.00365441	110789/101772/11418/11941/50769/24115/12298/170788/270190/14360/14812/14823/16398/18216/21906/11994/667742/171395/76645/20356/20357/13409/22157	23
GO:0035773	BP	GO:0035773	insulin secretion involved in cellular response to glucose stimulus	18/1811	93/23355	0.000250985	0.00457946	0.00367881	101772/12289/12290/12638/13640/16847/16971/16973/18189/18575/18576/218461/18754/19275/19276/52055/21844/26950	18
GO:1990845	BP	GO:1990845	adaptive thermogenesis	26/1811	160/23355	0.000252144	0.00458555	0.00368371	66082/14081/12491/12683/67299/13592/26381/14683/16001/333050/16847/240028/14245/26399/230598/227120/224860/19017/170826/70673/19664/319229/20660/22095/94187/329003	26
GO:0030072	BP	GO:0030072	peptide hormone secretion	40/1811	289/23355	0.000254783	0.00461846	0.00371014	20927/101772/54126/12288/12289/12290/12638/12753/12894/13640/14652/15378/15893/16443/545156/16535/16847/16971/16973/245049/18125/18189/18575/18576/218461/18754/19275/19276/52055/235442/56508/19726/116838/74370/20502/207227/60510/21844/21943/26950	40
GO:0051924	BP	GO:0051924	regulation of calcium ion transport	39/1811	280/23355	0.000265389	0.0047951	0.00385205	238161/109676/11941/24115/12286/12288/12289/12298/13367/13405/14169/14360/14652/14681/14697/26556/16438/16867/17096/107589/18125/70729/319239/18216/233571/18578/238871/234779/381925/18754/19165/19739/20191/20541/20840/20866/116873/13409/22066	39
GO:0007163	BP	GO:0007163	establishment or maintenance of cell polarity	33/1811	224/23355	0.000273861	0.00493216	0.00396215	225638/75723/192197/214444/76707/170788/13383/23859/94176/67299/270190/20336/14048/209630/232288/56637/16001/83964/269152/16772/108030/242274/17756/93742/72823/241035/18762/71461/69288/76816/74206/338362/22422	33
GO:0042326	BP	GO:0042326	negative regulation of phosphorylation	52/1811	408/23355	0.000276724	0.00496764	0.00399065	110532/108909/11600/11814/20238/214444/215748/69601/13405/240672/18605/13844/13853/14682/56637/208727/15378/16001/52662/16973/233328/66725/17096/17762/18125/18213/93742/238871/18613/98496/19013/19017/320472/108099/19085/19088/18750/18762/19165/19263/19277/19281/100502698/230126/20541/20563/69726/102141/20660/70834/83383/22062	52
GO:0009581	BP	GO:0009581	detection of external stimulus	23/1811	135/23355	0.000277929	0.00497324	0.00399515	110789/101772/11418/11941/50769/24115/12298/170788/270190/14360/14812/14823/16398/18216/21906/11994/667742/171395/76645/20356/20357/13409/22157	23
GO:0060402	BP	GO:0060402	calcium ion transport into cytosol	26/1811	161/23355	0.000278923	0.00497501	0.00399657	11549/238161/109676/12288/13367/13405/270028/14360/14652/14811/14812/16438/16439/16867/17096/319239/18216/233571/238871/234779/18754/20190/20191/20192/20541/17364	26
GO:0098815	BP	GO:0098815	modulation of excitatory postsynaptic potential	13/1811	56/23355	0.000281594	0.00500662	0.00402196	13048/14811/56637/66725/192167/18189/18762/19699/116837/116838/210274/64009/81907	13
GO:0003281	BP	GO:0003281	ventricular septum development	17/1811	86/23355	0.000283996	0.00503324	0.00404335	13430/14183/14725/268977/18018/71461/19664/19876/268902/20563/20564/17128/24069/21388/109181/241431/22762	17
GO:0002028	BP	GO:0002028	regulation of sodium ion transport	18/1811	94/23355	0.000288262	0.00509264	0.00409106	23797/11735/381290/215748/13405/13430/14167/14169/14683/94253/83814/432450/269513/18125/18795/545622/20541/80297	18
GO:0030073	BP	GO:0030073	insulin secretion	34/1811	234/23355	0.000290429	0.00511468	0.00410877	20927/101772/12288/12289/12290/12638/12753/12894/13640/14652/15378/15893/16535/16847/16971/16973/245049/18125/18189/18575/18576/218461/18754/19275/19276/52055/56508/19726/116838/74370/207227/60510/21844/26950	34
GO:0006874	BP	GO:0006874	cellular calcium ion homeostasis	59/1811	480/23355	0.000295112	0.00518075	0.00416184	11549/11548/238161/109676/224079/11941/381290/12286/12288/12298/12308/12491/22295/13367/244667/13405/13982/270028/14360/14652/14811/14812/14816/234515/16438/16439/16510/16867/16971/17096/216001/18125/319239/18216/233571/238871/241035/234779/18750/18751/18754/19091/19165/229877/20190/20191/20192/76775/94249/20541/20866/116873/21336/240174/22045/22066/26946/17364/56491	59
GO:0003351	BP	GO:0003351	epithelial cilium movement involved in extracellular fluid movement	10/1811	36/23355	0.000299488	0.00520829	0.00418397	271639/100048534/13411/16348/75050/19726/66722/74362/320277/209012	10
GO:0060292	BP	GO:0060292	long-term synaptic depression	10/1811	36/23355	0.000299488	0.00520829	0.00418397	66082/320127/14799/14804/17762/243725/210274/81840/66673/29819	10
GO:0071320	BP	GO:0071320	cellular response to cAMP	10/1811	36/23355	0.000299488	0.00520829	0.00418397	238161/432442/12638/15165/16438/16439/16535/107746/76089/20541	10
GO:1902903	BP	GO:1902903	regulation of supramolecular fiber organization	49/1811	380/23355	0.000311712	0.00540398	0.00434117	242894/69710/73910/11856/72754/230837/66898/12345/214444/68178/76707/235431/12386/50768/13383/13548/78798/14026/14158/225288/14260/544963/57748/77569/17756/17762/260315/50490/54631/83679/18613/208177/213556/320472/243725/277360/18754/20356/110380/20563/17128/66616/74392/20257/118449/21336/23963/21916/245880	49
GO:0003341	BP	GO:0003341	cilium movement	29/1811	189/23355	0.000314356	0.00543289	0.0043644	271639/104111/213402/381290/12290/76856/226356/100048534/74453/380654/56087/13411/110083/330355/227058/100101919/237806/226265/244653/16348/75050/19726/66722/74362/320277/21336/320244/209012/269701	29
GO:0106106	BP	GO:0106106	cold-induced thermogenesis	24/1811	145/23355	0.000323659	0.00555914	0.00446581	66082/14081/12491/12683/67299/13592/26381/14683/16001/333050/16847/240028/14245/26399/230598/227120/224860/19017/170826/70673/19664/22095/94187/329003	24
GO:0120161	BP	GO:0120161	regulation of cold-induced thermogenesis	24/1811	145/23355	0.000323659	0.00555914	0.00446581	66082/14081/12491/12683/67299/13592/26381/14683/16001/333050/16847/240028/14245/26399/230598/227120/224860/19017/170826/70673/19664/22095/94187/329003	24
GO:0010765	BP	GO:0010765	positive regulation of sodium ion transport	11/1811	43/23355	0.000333298	0.00568958	0.0045706	23797/11735/215748/13405/13430/14167/14169/14683/83814/18125/18795	11
GO:0021955	BP	GO:0021955	central nervous system neuron axonogenesis	11/1811	43/23355	0.000333298	0.00568958	0.0045706	110532/12552/13176/270190/13844/14633/243743/18750/20563/80297/230676	11
GO:0031032	BP	GO:0031032	actomyosin structure organization	31/1811	208/23355	0.000336339	0.00572394	0.0045982	69710/11856/72754/230837/73647/217866/68178/76707/235431/13007/50768/13823/14026/225288/108655/242506/319710/77569/71960/74103/50490/18175/218194/208177/320472/243725/17128/20411/21336/21916/21955	31
GO:0060070	BP	GO:0060070	canonical Wnt signaling pathway	40/1811	293/23355	0.000339153	0.00575422	0.00462253	83675/12558/18647/18163/13132/69601/244667/330938/13607/14183/14682/103978/56637/16348/16646/110648/16973/233328/66725/17342/235542/71461/19277/19273/107746/207181/19664/66743/26564/56505/20356/380702/56274/21415/74493/73668/68889/17847/22419/22422	40
GO:0051494	BP	GO:0051494	negative regulation of cytoskeleton organization	27/1811	172/23355	0.000343885	0.00581678	0.00467279	69710/11856/12345/12449/214444/68178/76707/235431/12386/50768/13548/78798/14026/225288/17756/260315/18613/208177/213556/243725/110380/20563/17128/74392/20257/329795/21916	27
GO:0046883	BP	GO:0046883	regulation of hormone secretion	41/1811	303/23355	0.000347007	0.00585179	0.00470092	20927/101772/54126/12289/12290/12638/12753/12894/13132/13640/14652/14683/15378/15893/16443/545156/16535/16847/16971/16973/245049/54003/18125/18189/18575/18576/218461/18754/52055/235442/19726/74370/12394/20394/17128/207227/60510/21336/21844/21943/26950	41
GO:0071560	BP	GO:0071560	cellular response to transforming growth factor beta stimulus	32/1811	218/23355	0.00035887	0.00603357	0.00484694	12683/12827/13132/13430/14118/53618/14360/16001/241226/16420/52662/380664/268977/26409/18099/19013/19017/70673/12394/170441/17128/17129/102141/20678/20679/14479/278507/80707/22612/21417/230597/328365	32
GO:0030050	BP	GO:0030050	vesicle transport along actin filament	7/1811	19/23355	0.000364793	0.00607806	0.00488268	60595/338367/71602/17919/208943/17922/245049	7
GO:1904754	BP	GO:1904754	positive regulation of vascular associated smooth muscle cell migration	7/1811	19/23355	0.000364793	0.00607806	0.00488268	238130/68813/67299/29875/16971/18552/319757	7
GO:1905874	BP	GO:1905874	regulation of postsynaptic density organization	7/1811	19/23355	0.000364793	0.00607806	0.00488268	12558/14804/16180/18189/18213/19266/217692	7
GO:0140056	BP	GO:0140056	organelle localization by membrane tethering	16/1811	80/23355	0.000369405	0.00613654	0.00492966	12638/20336/17967/18189/19165/67295/235442/116837/116838/212986/20908/55943/208898/56491/77573/22365	16
GO:0006865	BP	GO:0006865	amino acid transport	26/1811	164/23355	0.000374945	0.00619311	0.00497511	319924/12286/12298/12934/13853/14805/14812/14816/108073/231549/18212/18216/19091/94279/114644/20502/20518/78830/625098/268706/229706/104245/26570/241919/50934/22066	26
GO:0099151	BP	GO:0099151	regulation of postsynaptic density assembly	6/1811	14/23355	0.000375443	0.00619311	0.00497511	14804/16180/18189/18213/19266/217692	6
GO:0034284	BP	GO:0034284	response to monosaccharide	29/1811	191/23355	0.00037615	0.00619311	0.00497511	101772/11814/12289/12290/12638/13640/14652/15378/16001/16847/16971/16973/50490/18189/18504/18575/18576/218461/18795/105787/108079/18754/19275/19276/52055/17128/21844/26950/56490	29
GO:0099637	BP	GO:0099637	neurotransmitter receptor transport	14/1811	65/23355	0.000382383	0.00627717	0.00504263	12300/54377/13430/103967/74053/269994/232227/16572/26414/17919/20908/64009/104015/69727	14
GO:0050919	BP	GO:0050919	negative chemotaxis	11/1811	44/23355	0.000413575	0.00676925	0.00543794	211323/18183/243743/19876/268902/20346/108151/214968/20563/20564/22253	11
GO:0060074	BP	GO:0060074	synapse maturation	9/1811	31/23355	0.000417113	0.0067983	0.00546127	69601/244667/13869/230868/18027/100042150/18189/19699/56747	9
GO:0044262	BP	GO:0044262	cellular carbohydrate metabolic process	40/1811	296/23355	0.000417972	0.0067983	0.00546127	100705/11548/26877/93961/14595/12491/234356/18605/13853/75578/17425/14348/69976/74185/108682/56637/208727/15378/15483/16002/234515/212111/217837/30949/16847/16867/68393/17978/83398/18216/233571/18639/19013/19017/108099/18754/19091/19883/20411/104015	40
GO:0071880	BP	GO:0071880	adenylate cyclase-activating adrenergic receptor signaling pathway	8/1811	25/23355	0.00041996	0.0067983	0.00546127	11515/11549/11548/381290/14683/18125/18578/76089	8
GO:0001933	BP	GO:0001933	negative regulation of protein phosphorylation	46/1811	355/23355	0.000420236	0.0067983	0.00546127	110532/108909/11600/214444/215748/69601/13405/240672/18605/13844/13853/14682/56637/15378/16001/52662/16973/233328/66725/17096/18125/18213/93742/238871/18613/98496/19017/320472/108099/19085/19088/18750/18762/19165/19263/19277/19281/230126/20541/20563/69726/102141/20660/70834/83383/22062	46
GO:0048278	BP	GO:0048278	vesicle docking	14/1811	66/23355	0.000451162	0.00726693	0.00583773	12638/20336/17967/18189/67295/235442/116837/116838/212986/20908/55943/208898/77573/22365	14
GO:0010876	BP	GO:0010876	lipid localization	59/1811	488/23355	0.000451816	0.00726693	0.00583773	268379/233810/381072/11304/18671/100705/14081/320091/12306/319924/11813/11814/319767/11980/50769/11981/50771/12491/12638/12683/13132/12934/67484/18605/13853/26383/14812/14816/108073/70676/56489/16867/15450/16971/231549/26399/18212/18216/74309/74486/71720/237542/100273/71795/18979/19013/19091/19206/12394/114644/210463/78830/26570/28250/108116/21763/72759/21943/219149	59
GO:0099518	BP	GO:0099518	vesicle cytoskeletal trafficking	15/1811	74/23355	0.000479496	0.00767833	0.00616823	60595/13426/17281/16553/16572/17756/338367/71602/17919/208943/17922/245049/327814/18762/67095	15
GO:0051968	BP	GO:0051968	positive regulation of synaptic transmission, glutamatergic	10/1811	38/23355	0.000482914	0.00767833	0.00616823	12300/54377/14802/192167/18189/18212/19699/26564/210274/21960	10
GO:0099174	BP	GO:0099174	regulation of presynapse organization	10/1811	38/23355	0.000482914	0.00767833	0.00616823	223254/23888/14804/16180/331461/60367/320772/192167/18189/18213	10
GO:2000463	BP	GO:2000463	positive regulation of excitatory postsynaptic potential	10/1811	38/23355	0.000482914	0.00767833	0.00616823	13048/14811/56637/192167/18189/18762/19699/116837/116838/210274	10
GO:0010770	BP	GO:0010770	positive regulation of cell morphogenesis involved in differentiation	18/1811	98/23355	0.000489666	0.00776351	0.00623665	213084/13048/13132/13430/330662/68813/13631/331461/545156/17919/18003/56349/74143/277360/19266/19699/29819/21844	18
GO:0008016	BP	GO:0008016	regulation of heart contraction	28/1811	185/23355	0.000495158	0.00782828	0.00628869	11549/11548/238161/109676/381290/12288/12289/12290/216033/13383/13405/14652/14681/208727/140492/16535/18125/18578/238871/242202/18750/19091/20191/20346/20541/80297/21834/435766	28
GO:0002791	BP	GO:0002791	regulation of peptide secretion	44/1811	338/23355	0.000501895	0.00788509	0.00633432	69865/20927/101772/225372/54126/12289/12290/12638/12753/12894/13640/320051/209630/14652/15378/15893/15932/16443/545156/16535/16847/16971/16973/102635496/245049/18125/18189/18484/18575/18576/218461/18754/52055/235442/56508/19726/74370/27414/78808/207227/60510/21844/21943/26950	44
GO:0097119	BP	GO:0097119	postsynaptic density protein 95 clustering	5/1811	10/23355	0.000504419	0.00788509	0.00633432	12558/192167/18189/18190/19699	5
GO:0099541	BP	GO:0099541	trans-synaptic signaling by lipid	5/1811	10/23355	0.000504419	0.00788509	0.00633432	66082/269060/108071/18189/18795	5
GO:0099542	BP	GO:0099542	trans-synaptic signaling by endocannabinoid	5/1811	10/23355	0.000504419	0.00788509	0.00633432	66082/269060/108071/18189/18795	5
GO:0071625	BP	GO:0071625	vocalization behavior	7/1811	20/23355	0.000523821	0.00816545	0.00655955	319974/66797/108655/71960/18189/18190/210274	7
GO:0043271	BP	GO:0043271	negative regulation of ion transport	46/1811	359/23355	0.000537398	0.00835072	0.00670838	20927/11600/11735/11813/12021/12491/18605/13844/13982/14167/209630/14681/14682/14697/108073/94253/15378/15932/545156/16497/16535/68421/66725/76273/83814/18125/18216/216440/108737/18575/18576/218461/98496/18704/18798/18750/18751/18754/19091/218699/52055/74370/27414/207227/68889/26950	46
GO:0048738	BP	GO:0048738	cardiac muscle tissue development	36/1811	261/23355	0.000538708	0.00835072	0.00670838	11549/11548/238161/225638/11600/12818/13869/14183/14200/225288/108655/56637/16468/16526/14725/17967/74103/50490/18175/211323/19013/19091/218772/19664/20191/24052/244431/20541/17128/20679/21388/23966/106628/22062/241431/22762	36
GO:0006029	BP	GO:0006029	proteoglycan metabolic process	15/1811	75/23355	0.000557036	0.00861086	0.00691735	239337/71367/234356/268780/319415/50787/15932/15450/71738/83398/235534/170441/72902/240725/233781	15
GO:0099010	BP	GO:0099010	modification of postsynaptic structure	8/1811	26/23355	0.000565659	0.00869583	0.00698561	12386/70598/56637/16443/545156/17919/21844/245880	8
GO:2000311	BP	GO:2000311	regulation of AMPA receptor activity	8/1811	26/23355	0.000565659	0.00869583	0.00698561	12300/54377/269994/192167/18189/19699/210274/380702	8
GO:0021859	BP	GO:0021859	pyramidal neuron differentiation	6/1811	15/23355	0.000584777	0.00896497	0.00720182	70762/244667/14183/94229/210801/328365	6
GO:0009749	BP	GO:0009749	response to glucose	28/1811	187/23355	0.000589764	0.00901658	0.00724328	101772/11814/12289/12290/12638/13640/14652/15378/16001/16847/16971/16973/50490/18189/18504/18575/18576/218461/105787/108079/18754/19275/19276/52055/17128/21844/26950/56490	28
GO:0046434	BP	GO:0046434	organophosphate catabolic process	24/1811	151/23355	0.000594784	0.00906842	0.00728492	76192/66082/11813/99586/18605/215446/14198/234515/212111/15450/18216/18573/238871/242202/18585/665270/18795/234779/18805/18947/241274/18979/104015/76654	24
GO:0006858	BP	GO:0006858	extracellular transport	10/1811	39/23355	0.000604768	0.00914548	0.00734683	271639/100048534/13411/16348/75050/19726/66722/74362/320277/209012	10
GO:0031279	BP	GO:0031279	regulation of cyclase activity	10/1811	39/23355	0.000604768	0.00914548	0.00734683	110789/238161/100986/12288/12289/67252/14708/18125/20866/21858	10
GO:0086065	BP	GO:0086065	cell communication involved in cardiac conduction	10/1811	39/23355	0.000604768	0.00914548	0.00734683	109676/12288/12289/216033/140492/16535/238871/20191/20541/435766	10
GO:0045807	BP	GO:0045807	positive regulation of endocytosis	21/1811	125/23355	0.000607539	0.00916248	0.00736049	60595/11600/12306/12491/13132/13430/13631/16398/16443/16971/14725/66725/50791/83814/192167/93742/234779/73094/64009/104015/72238	21
GO:0022029	BP	GO:0022029	telencephalon cell migration	14/1811	68/23355	0.000620703	0.00933571	0.00749964	68146/13131/69601/244667/330938/66725/211323/18183/19699/19876/20563/14270/21960/328365	14
GO:0048854	BP	GO:0048854	brain morphogenesis	11/1811	46/23355	0.000623181	0.00934771	0.00750929	23797/12558/12386/14088/18504/19165/210274/94229/319757/20662/320277	11
GO:0045927	BP	GO:0045927	positive regulation of growth	41/1811	312/23355	0.000633001	0.0094695	0.00760712	100705/238161/50769/12561/244667/13383/13508/13640/13869/14183/56637/16001/16002/30841/16971/23938/71751/17762/269878/17919/17967/83814/211323/18213/18261/18795/102502/19664/76438/116837/116838/74370/20356/73094/319757/80297/20980/21388/106628/22095/22762	41
GO:0055007	BP	GO:0055007	cardiac muscle cell differentiation	23/1811	143/23355	0.00064615	0.00964029	0.00774432	11549/11548/238161/225638/12818/14200/225288/108655/56637/74103/50490/18175/211323/19013/19091/218772/19664/24052/20541/17128/20679/21388/106628	23
GO:0090276	BP	GO:0090276	regulation of peptide hormone secretion	33/1811	235/23355	0.000654757	0.00974257	0.00782649	20927/101772/54126/12289/12290/12638/12753/12894/13640/14652/15378/15893/16443/545156/16535/16847/16971/16973/245049/18125/18189/18575/18576/218461/18754/235442/19726/74370/207227/60510/21844/21943/26950	33
GO:0006898	BP	GO:0006898	receptor-mediated endocytosis	34/1811	245/23355	0.000677982	0.0100613	0.0080825	269774/11600/12306/11813/12300/54377/12491/65969/13132/235567/13430/103967/14799/269994/232227/16443/241576/68421/16971/14725/50791/17533/93742/234779/18750/217835/73094/66616/20660/64009/104015/72238/81907/69727	34
GO:0055017	BP	GO:0055017	cardiac muscle tissue growth	19/1811	109/23355	0.000681173	0.0100817	0.00809895	11549/11548/238161/12818/13869/14183/108655/56637/16468/16526/17967/19013/19091/19664/21388/23966/106628/22062/22762	19
GO:0051235	BP	GO:0051235	maintenance of location	42/1811	324/23355	0.000723867	0.0106145	0.00852697	100705/238161/100986/109676/11735/71435/12021/12491/12683/13367/13405/18605/14118/26383/14652/56489/16438/16439/16867/268977/17096/319239/18216/216440/237542/233571/238871/234779/19013/18754/20190/20191/20192/20541/20660/24069/64009/209361/70573/72759/78610/230895	42
GO:1904377	BP	GO:1904377	positive regulation of protein localization to cell periphery	14/1811	69/23355	0.00072396	0.0106145	0.00852697	381290/12300/13383/269109/13483/13844/14677/16971/17919/18189/102502/20411/20840/20908	14
GO:0045216	BP	GO:0045216	cell-cell junction organization	30/1811	208/23355	0.000724071	0.0106145	0.00852697	20927/60595/12552/215654/320865/227485/12558/104010/12563/12565/70737/56173/74987/18163/13383/13823/15378/83964/83814/93742/18613/241035/227937/18750/18755/19277/71323/110380/74392/241431	30
GO:0045475	BP	GO:0045475	locomotor rhythm	7/1811	21/23355	0.000733442	0.0106145	0.00852697	382543/16531/16847/26414/17978/18143/11906	7
GO:0090036	BP	GO:0090036	regulation of protein kinase C signaling	7/1811	21/23355	0.000733442	0.0106145	0.00852697	110789/11549/12345/110197/98432/56747/209012	7
GO:0099515	BP	GO:0099515	actin filament-based transport	7/1811	21/23355	0.000733442	0.0106145	0.00852697	60595/338367/71602/17919/208943/17922/245049	7
GO:1900006	BP	GO:1900006	positive regulation of dendrite development	7/1811	21/23355	0.000733442	0.0106145	0.00852697	11682/12808/382056/69601/16180/29875/74143	7
GO:0007044	BP	GO:0007044	cell-substrate junction assembly	17/1811	93/23355	0.000734339	0.0106145	0.00852697	11856/192197/76707/235431/50768/13518/13640/14260/29875/16398/16774/77569/16971/244895/208177/20411/21961	17
GO:0043506	BP	GO:0043506	regulation of JUN kinase activity	17/1811	93/23355	0.000734339	0.0106145	0.00852697	108909/13132/69601/99470/71751/26407/338372/26390/26564/70097/70834/330177/21844/21943/665113/22062/22422	17
GO:0043507	BP	GO:0043507	positive regulation of JUN kinase activity	15/1811	77/23355	0.000744547	0.0107342	0.0086231	13132/69601/99470/71751/26407/338372/26390/26564/70097/70834/330177/21844/21943/665113/22422	15
GO:0060113	BP	GO:0060113	inner ear receptor cell differentiation	16/1811	85/23355	0.000746591	0.0107359	0.00862443	110789/11941/22295/14402/433899/16531/171166/667663/329421/11994/102502/19664/13409/109181/22095/22283	16
GO:0090103	BP	GO:0090103	cochlea morphogenesis	8/1811	27/23355	0.000749627	0.0107517	0.00863718	14048/14633/667663/329421/18504/71461/22095/21417	8
GO:0051258	BP	GO:0051258	protein polymerization	39/1811	295/23355	0.000753385	0.0107779	0.00865817	242894/73910/66898/12345/71276/214444/76707/12808/12386/13367/56419/13383/13430/103967/13548/14026/14158/225288/14260/544963/57748/17756/17762/260315/54631/74143/83679/18613/243725/277360/18754/19201/20563/66616/20257/23963/21916/74569/245880	39
GO:0009746	BP	GO:0009746	response to hexose	28/1811	190/23355	0.000761367	0.0108641	0.00872746	101772/11814/12289/12290/12638/13640/14652/15378/16001/16847/16971/16973/50490/18189/18504/18575/18576/218461/105787/108079/18754/19275/19276/52055/17128/21844/26950/56490	28
GO:0014911	BP	GO:0014911	positive regulation of smooth muscle cell migration	13/1811	62/23355	0.000800602	0.0113948	0.00915374	238130/68813/67299/208727/29875/16398/16971/50490/233571/18552/56508/214968/319757	13
GO:0060419	BP	GO:0060419	heart growth	20/1811	119/23355	0.000805804	0.0114395	0.00918972	100705/11549/11548/238161/12818/13869/14183/108655/56637/16468/16526/17967/19013/19091/19664/21388/23966/106628/22062/22762	20
GO:0050796	BP	GO:0050796	regulation of insulin secretion	28/1811	191/23355	0.000827539	0.0117182	0.00941358	20927/101772/12289/12290/12638/12753/12894/13640/14652/15378/15893/16535/16847/16971/16973/245049/18125/18189/18575/18576/218461/18754/19726/74370/207227/60510/21844/26950	28
GO:0018210	BP	GO:0018210	peptidyl-threonine modification	21/1811	128/23355	0.000835904	0.0118066	0.00948459	23797/217866/13548/231050/271786/108148/270049/56637/231876/66725/26409/667663/329421/18099/108737/93742/108099/18750/18751/74370/56480	21
GO:1901019	BP	GO:1901019	regulation of calcium ion transmembrane transporter activity	16/1811	86/23355	0.000852327	0.0119802	0.00962406	238161/109676/12286/12298/13405/14169/14697/70729/233571/18578/238871/234779/20191/20840/20866/116873	16
GO:0021549	BP	GO:0021549	cerebellum development	19/1811	111/23355	0.000856702	0.0119802	0.00962406	11941/12286/13131/330938/14402/14633/14804/16001/93688/110648/16917/78286/18189/71365/68703/19883/56747/319757/73668	19
GO:0051209	BP	GO:0051209	release of sequestered calcium ion into cytosol	19/1811	111/23355	0.000856702	0.0119802	0.00962406	238161/109676/13367/13405/14652/16438/16439/16867/17096/319239/18216/233571/238871/234779/18754/20190/20191/20192/20541	19
GO:0060976	BP	GO:0060976	coronary vasculature development	15/1811	78/23355	0.000856807	0.0119802	0.00962406	108154/11600/13430/110350/14183/16971/14725/268977/269878/18552/71461/19876/24052/24069/22762	15
GO:0050954	BP	GO:0050954	sensory perception of mechanical stimulus	40/1811	307/23355	0.000864901	0.0120042	0.00964335	110789/11418/11941/12289/67501/22295/244682/13367/225055/14360/14402/14812/108073/14823/433899/16398/16531/269629/240411/14725/171166/71960/667663/329421/17922/78286/17993/246190/628870/11994/667742/192190/26563/20273/109205/80297/21834/13409/252974/22283	40
GO:0006171	BP	GO:0006171	cAMP biosynthetic process	5/1811	11/23355	0.000865755	0.0120042	0.00964335	271639/210044/104111/11513/11515	5
GO:0007158	BP	GO:0007158	neuron cell-cell adhesion	5/1811	11/23355	0.000865755	0.0120042	0.00964335	11899/56079/192167/18189/21960	5
GO:1904950	BP	GO:1904950	negative regulation of establishment of protein localization	23/1811	146/23355	0.000867152	0.0120042	0.00964335	20927/11600/12021/12491/235431/209630/15378/15932/16535/66725/17762/76273/18125/216440/18575/18576/218461/52055/74370/27414/207227/68889/26950	23
GO:0010634	BP	GO:0010634	positive regulation of epithelial cell migration	24/1811	155/23355	0.00087058	0.0120218	0.00965745	23797/75723/11600/12927/192197/320924/76707/330662/68813/23871/14389/79221/16002/232227/16398/18704/234779/18750/18754/74030/70097/20356/64074/21336	24
GO:0035235	BP	GO:0035235	ionotropic glutamate receptor signaling pathway	6/1811	16/23355	0.000874495	0.012046	0.00967687	14805/14811/14812/242443/545156/21844	6
GO:1903522	BP	GO:1903522	regulation of blood circulation	34/1811	249/23355	0.000904787	0.0124324	0.00998734	11549/11548/238161/109676/11418/381290/12288/12289/12290/216033/13383/13405/238130/68813/240672/14652/14681/208727/140492/16535/18125/18578/238871/242202/18750/19091/20191/20346/20541/80297/21336/21391/21834/435766	34
GO:0033173	BP	GO:0033173	calcineurin-NFAT signaling cascade	11/1811	48/23355	0.000914491	0.0125348	0.0100696	238161/381290/100072/76469/14200/56637/18018/18019/211323/53901/20495	11
GO:0001659	BP	GO:0001659	temperature homeostasis	27/1811	183/23355	0.000919506	0.0125726	0.0100999	66082/14081/12491/12683/67299/13592/26381/26383/14683/16001/333050/16847/240028/14245/26399/230598/18216/227120/224860/19017/170826/70673/19664/21943/22095/94187/329003	27
GO:0010737	BP	GO:0010737	protein kinase A signaling	10/1811	41/23355	0.000924985	0.0125857	0.0101104	110789/238161/432442/14118/14812/66725/18189/23984/19085/19088	10
GO:1901021	BP	GO:1901021	positive regulation of calcium ion transmembrane transporter activity	10/1811	41/23355	0.000924985	0.0125857	0.0101104	238161/109676/12298/14169/233571/234779/20191/20840/20866/116873	10
GO:0051051	BP	GO:0051051	negative regulation of transport	58/1811	492/23355	0.000933458	0.01267	0.0101782	20927/109934/11600/11735/16790/11813/12021/12491/18605/13844/13982/14167/209630/14681/14682/14683/14697/108073/94253/15378/15932/331461/545156/16497/16535/68421/66725/17762/78771/76273/83814/18125/319239/18216/216440/108737/18575/18576/218461/98496/18704/18798/243725/18750/18751/18754/19091/218699/52055/19349/217835/74370/100502698/27414/207227/210789/68889/26950	58
GO:0051283	BP	GO:0051283	negative regulation of sequestering of calcium ion	19/1811	112/23355	0.000958133	0.0129733	0.0104218	238161/109676/13367/13405/14652/16438/16439/16867/17096/319239/18216/233571/238871/234779/18754/20190/20191/20192/20541	19
GO:0090287	BP	GO:0090287	regulation of cellular response to growth factor stimulus	38/1811	289/23355	0.000967652	0.0130202	0.0104595	239337/11600/381290/320924/12683/50766/13132/69601/13405/13430/76829/213452/14118/241226/52662/380664/14725/268977/18189/19013/70673/18751/19664/19876/12393/170441/20563/17128/64074/102141/20660/240725/21413/81907/278507/21417/94187/230597	38
GO:0021885	BP	GO:0021885	forebrain cell migration	14/1811	71/23355	0.00097443	0.0130202	0.0104595	68146/13131/69601/244667/330938/66725/211323/18183/19699/19876/20563/14270/21960/328365	14
GO:0006486	BP	GO:0006486	protein glycosylation	28/1811	193/23355	0.000975077	0.0130202	0.0104595	333424/66789/26877/93961/14595/338337/233824/53618/14348/231050/271786/233733/108148/108150/270049/67569/107895/94229/20441/20447/26938/20449/241230/387314/278279/109181/80286/268880	28
GO:0030832	BP	GO:0030832	regulation of actin filament length	28/1811	193/23355	0.000975077	0.0130202	0.0104595	242894/73910/66898/12345/12386/13383/14026/14158/225288/14260/544963/57748/667663/329421/54631/18613/213556/243725/277360/18754/20356/110380/20563/66616/74392/23963/21916/245880	28
GO:0043413	BP	GO:0043413	macromolecule glycosylation	28/1811	193/23355	0.000975077	0.0130202	0.0104595	333424/66789/26877/93961/14595/338337/233824/53618/14348/231050/271786/233733/108148/108150/270049/67569/107895/94229/20441/20447/26938/20449/241230/387314/278279/109181/80286/268880	28
GO:0050708	BP	GO:0050708	regulation of protein secretion	39/1811	299/23355	0.000975641	0.0130202	0.0104595	69865/20927/101772/225372/12289/12290/12638/12753/12894/13640/320051/209630/14652/15378/15893/15932/16535/16847/16971/16973/102635496/245049/18125/18189/18484/18575/18576/218461/18754/52055/56508/19726/74370/27414/78808/207227/60510/21844/26950	39
GO:0140058	BP	GO:0140058	neuron projection arborization	8/1811	28/23355	0.000978789	0.013031	0.0104682	74053/14725/66725/71751/192167/80883/218194/20346	8
GO:0043254	BP	GO:0043254	regulation of protein-containing complex assembly	53/1811	441/23355	0.000981368	0.0130342	0.0104707	242894/108909/73910/13196/54343/66898/12345/12491/214444/12386/69601/13383/13548/13982/14026/14158/225288/14260/56637/15893/544963/83964/57748/30949/52662/17756/26409/17762/260315/17967/268857/54631/72333/18552/83679/18613/243725/277360/18754/18762/19165/116837/78473/20563/66616/20660/224008/20257/78808/23963/21916/22045/245880	53
GO:0046620	BP	GO:0046620	regulation of organ growth	20/1811	121/23355	0.000998719	0.013233	0.0106305	100705/238161/12288/12818/13869/14183/108655/16002/16468/16526/17967/19013/19664/319757/56274/21388/106628/22062/52357/22762	20
GO:0007224	BP	GO:0007224	smoothened signaling pathway	24/1811	157/23355	0.00104592	0.0138255	0.0111065	76967/68146/68897/110350/18605/50758/14183/14633/226861/106633/245866/380614/269878/19206/26564/19883/12393/64706/319757/24069/73668/213081/22422/94187	24
GO:0007043	BP	GO:0007043	cell-cell junction assembly	23/1811	148/23355	0.00104844	0.0138259	0.0111068	60595/12552/215654/320865/227485/12558/104010/12563/12565/70737/56173/74987/18163/13383/13823/83964/83814/93742/18613/227937/18750/18755/19277	23
GO:0008306	BP	GO:0008306	associative learning	19/1811	113/23355	0.00106967	0.0140726	0.0113049	20927/104111/11548/20238/12288/12290/94109/14652/14811/14812/108073/15932/17536/218461/19699/26570/21336/66860/21960	19
GO:0090102	BP	GO:0090102	cochlea development	11/1811	49/23355	0.00109772	0.0144076	0.0115741	11941/14048/14402/14633/667663/329421/18504/71461/109205/22095/21417	11
GO:0021846	BP	GO:0021846	cell proliferation in forebrain	9/1811	35/23355	0.00110162	0.0144248	0.0115879	244667/330938/67299/14183/320191/20602/320165/57752/22422	9
GO:0031098	BP	GO:0031098	stress-activated protein kinase signaling cascade	34/1811	252/23355	0.00111611	0.0145802	0.0117127	108909/13132/69601/330938/13383/270190/14167/14169/404194/16001/17096/99470/71751/26407/26409/338372/26414/26390/14013/54631/98432/18795/107746/26564/70097/59009/70834/56274/330177/21943/665113/22062/209012/22422	34
GO:0043279	BP	GO:0043279	response to alkaloid	15/1811	80/23355	0.00112468	0.0146577	0.011775	319387/11548/54377/26556/545156/17967/18125/105787/108079/18754/20190/20191/330222/20541/224008	15
GO:0051339	BP	GO:0051339	regulation of lyase activity	10/1811	42/23355	0.00113075	0.0147024	0.0118109	110789/238161/100986/12288/12289/67252/14708/18125/20866/21858	10
GO:0014074	BP	GO:0014074	response to purine-containing compound	18/1811	105/23355	0.00113735	0.0147537	0.0118521	238161/432442/12638/15165/16438/16439/16535/17993/233571/54611/234779/105787/108079/107746/76089/20190/20191/20541	18
GO:0048511	BP	GO:0048511	rhythmic process	39/1811	302/23355	0.00117831	0.0152495	0.0122503	382543/224671/12753/382056/99586/76843/13548/239188/13982/50758/50754/14402/14811/14812/242443/56637/15378/195646/16001/16531/16847/16867/26414/17978/192167/18143/18212/18213/98432/19013/19017/105787/108079/19091/19275/19883/12394/30953/11906	39
GO:0051282	BP	GO:0051282	regulation of sequestering of calcium ion	19/1811	114/23355	0.00119211	0.0153923	0.0123651	238161/109676/13367/13405/14652/16438/16439/16867/17096/319239/18216/233571/238871/234779/18754/20190/20191/20192/20541	19
GO:0070252	BP	GO:0070252	actin-mediated cell contraction	17/1811	97/23355	0.00119853	0.0154394	0.0124029	238161/109676/12288/12289/216033/13383/319710/140492/16535/77569/83814/18125/93742/18578/238871/20191/24052	17
GO:0003205	BP	GO:0003205	cardiac chamber development	28/1811	196/23355	0.00123917	0.0158894	0.0127644	108154/13411/13430/14183/14200/381157/16971/14725/268977/18018/18552/71461/218772/19664/19876/268902/20191/20563/20564/17128/66993/319757/20662/24069/21388/109181/241431/22762	28
GO:0120032	BP	GO:0120032	regulation of plasma membrane bounded cell projection assembly	28/1811	196/23355	0.00123917	0.0158894	0.0127644	69710/231532/319974/192197/12345/12808/13430/103967/14026/14158/208727/15378/106633/232944/667663/329421/192167/18189/74055/18805/27205/243725/76816/20563/29819/64009/23963/329795	28
GO:0021700	BP	GO:0021700	developmental maturation	42/1811	333/23355	0.00124862	0.0159418	0.0128065	210933/11735/12190/12286/76856/271036/12400/12638/66797/69601/244667/23859/13869/14682/56637/230868/16531/66725/71751/18027/319504/100042150/18189/74143/18504/54611/18795/19165/19275/19664/19699/68703/19726/20112/12394/12393/20190/56747/230126/80297/208898/233781	42
GO:0002068	BP	GO:0002068	glandular epithelial cell development	8/1811	29/23355	0.00126072	0.0159418	0.0128065	12558/12571/12638/12753/15378/218772/19726/319757	8
GO:0071875	BP	GO:0071875	adrenergic receptor signaling pathway	8/1811	29/23355	0.00126072	0.0159418	0.0128065	11515/11549/11548/381290/14683/18125/18578/76089	8
GO:1904752	BP	GO:1904752	regulation of vascular associated smooth muscle cell migration	8/1811	29/23355	0.00126072	0.0159418	0.0128065	238130/68813/67299/29875/16971/18552/19091/319757	8
GO:0017014	BP	GO:0017014	protein nitrosylation	6/1811	17/23355	0.00126331	0.0159418	0.0128065	381290/69219/13405/18125/70729/170719	6
GO:1900452	BP	GO:1900452	regulation of long-term synaptic depression	6/1811	17/23355	0.00126331	0.0159418	0.0128065	320127/14804/17762/243725/66673/29819	6
GO:1904889	BP	GO:1904889	regulation of excitatory synapse assembly	6/1811	17/23355	0.00126331	0.0159418	0.0128065	14804/16180/18189/18213/19266/217692	6
GO:0050848	BP	GO:0050848	regulation of calcium-mediated signaling	15/1811	81/23355	0.00128309	0.0161547	0.0129776	238161/381290/100072/12554/76469/20336/14200/56637/16438/16867/66725/17762/17967/211323/20495	15
GO:0045926	BP	GO:0045926	negative regulation of growth	35/1811	264/23355	0.0012988	0.0163156	0.0131068	11787/12053/213084/68755/13132/69601/239667/18605/17425/108655/320027/14683/56637/15378/16468/16526/17756/19013/19206/20346/108151/20356/20357/214968/58172/20563/20564/17128/70834/56274/21388/24087/21960/22062/52357	35
GO:0021532	BP	GO:0021532	neural tube patterning	11/1811	50/23355	0.00131016	0.0163795	0.0131582	68146/14633/106633/30841/18509/19165/19206/66743/319757/24069/213081	11
GO:0048489	BP	GO:0048489	synaptic vesicle transport	11/1811	50/23355	0.00131016	0.0163795	0.0131582	13430/103967/12934/14183/16572/108030/66725/17756/192167/214585/104015	11
GO:0009612	BP	GO:0009612	response to mechanical stimulus	26/1811	178/23355	0.00131272	0.0163795	0.0131582	76192/110789/11418/11941/50769/12491/66797/13405/14360/14812/14823/56637/16398/545156/18125/18189/18190/18504/11994/667742/171395/76645/20191/20541/21336/13409	26
GO:0060348	BP	GO:0060348	bone development	32/1811	235/23355	0.00131779	0.016406	0.0131794	11308/12306/12590/234356/69190/14118/50754/14183/71375/14683/15932/16420/16973/233328/17002/26399/26409/269878/23850/23972/29809/223332/218772/12393/20190/70661/76775/17129/240725/21943/109181/233781	32
GO:0051651	BP	GO:0051651	maintenance of location in cell	30/1811	216/23355	0.00133962	0.0166303	0.0133596	238161/100986/109676/11735/71435/12021/13367/13405/14652/16438/16439/16867/17096/319239/18216/216440/233571/238871/234779/18754/20190/20191/20192/20541/20660/64009/209361/70573/78610/230895	30
GO:0055013	BP	GO:0055013	cardiac muscle cell development	17/1811	98/23355	0.00134731	0.0166303	0.0133596	11549/11548/238161/225638/12818/14200/225288/108655/56637/74103/18175/19013/19091/24052/20541/17128/106628	17
GO:0003323	BP	GO:0003323	type B pancreatic cell development	7/1811	23/23355	0.00134776	0.0166303	0.0133596	12558/12571/12638/12753/15378/19726/319757	7
GO:1902547	BP	GO:1902547	regulation of cellular response to vascular endothelial growth factor stimulus	7/1811	23/23355	0.00134776	0.0166303	0.0133596	239337/381290/320924/69601/19876/64074/21413	7
GO:0021543	BP	GO:0021543	pallium development	24/1811	160/23355	0.00136585	0.0168162	0.013509	11682/12558/13131/69601/70762/244667/330938/56637/67703/110648/18212/218194/18795/19699/19876/20563/319757/14270/320165/57752/81907/76510/22062/328365	24
GO:1901381	BP	GO:1901381	positive regulation of potassium ion transmembrane transport	10/1811	43/23355	0.0013724	0.0168597	0.0135439	20927/238161/432442/100986/109676/13430/13483/16535/19091/24012	10
GO:0030041	BP	GO:0030041	actin filament polymerization	27/1811	188/23355	0.00138441	0.016922	0.0135939	242894/73910/66898/12345/12808/12386/13367/56419/13383/14026/14158/225288/14260/544963/57748/54631/18613/243725/277360/18754/19201/20563/66616/23963/21916/74569/245880	27
GO:0010469	BP	GO:0010469	regulation of signaling receptor activity	22/1811	142/23355	0.00138707	0.016922	0.0135939	11804/12300/54377/380686/69635/224997/244310/13844/50754/14811/269994/26556/192167/18189/19013/19017/19165/19417/19699/19739/210274/380702	22
GO:0090043	BP	GO:0090043	regulation of tubulin deacetylation	5/1811	12/23355	0.00138964	0.016922	0.0135939	14272/320365/17762/105787/108079	5
GO:0098693	BP	GO:0098693	regulation of synaptic vesicle cycle	5/1811	12/23355	0.00138964	0.016922	0.0135939	12217/18189/18805/19085/56508	5
GO:0051403	BP	GO:0051403	stress-activated MAPK cascade	32/1811	236/23355	0.00141379	0.0171785	0.0138	108909/13132/69601/330938/13383/270190/14167/14169/16001/99470/71751/26407/26409/338372/26414/26390/14013/54631/98432/18795/107746/26564/70097/59009/70834/56274/330177/21943/665113/22062/209012/22422	32
GO:0006869	BP	GO:0006869	lipid transport	52/1811	438/23355	0.00142677	0.0172984	0.0138963	268379/233810/381072/11304/18671/14081/320091/12306/319924/11813/11814/319767/11980/50769/11981/50771/12491/12638/13132/12934/67484/13853/14812/14816/108073/70676/16867/15450/16971/231549/26399/18212/18216/74309/74486/71720/237542/100273/71795/18979/19091/19206/12394/114644/210463/78830/26570/28250/108116/21763/21943/219149	52
GO:0060491	BP	GO:0060491	regulation of cell projection assembly	28/1811	198/23355	0.00144784	0.0175158	0.0140709	69710/231532/319974/192197/12345/12808/13430/103967/14026/14158/208727/15378/106633/232944/667663/329421/192167/18189/74055/18805/27205/243725/76816/20563/29819/64009/23963/329795	28
GO:0045913	BP	GO:0045913	positive regulation of carbohydrate metabolic process	15/1811	82/23355	0.00145982	0.0176223	0.0141565	11548/12491/108682/15378/16002/16867/18216/233571/19013/105787/108079/18754/54403/20411/56490	15
GO:0051208	BP	GO:0051208	sequestering of calcium ion	19/1811	116/23355	0.00147312	0.0177444	0.0142546	238161/109676/13367/13405/14652/16438/16439/16867/17096/319239/18216/233571/238871/234779/18754/20190/20191/20192/20541	19
GO:0030198	BP	GO:0030198	extracellular matrix organization	39/1811	306/23355	0.00150539	0.0180939	0.0145354	239337/216725/223838/108154/77739/69538/12306/11787/11804/14595/76707/12818/12819/12822/12823/237759/77018/213945/12827/12829/94216/78892/234356/268780/23871/545291/15932/241226/380664/16917/71602/18073/80883/208177/20356/170441/64074/240725/21960	39
GO:0062013	BP	GO:0062013	positive regulation of small molecule metabolic process	23/1811	152/23355	0.00151071	0.0181188	0.0145553	11548/11813/12491/69634/12894/13132/68801/108682/15378/16002/16867/18125/18216/233571/98496/19013/19017/105787/108079/18754/54403/20411/56490	23
GO:0055002	BP	GO:0055002	striated muscle cell development	21/1811	134/23355	0.0015208	0.0182005	0.014621	12298/73647/12345/13007/13405/227325/225288/108655/208727/79221/26556/74103/18175/20190/24052/20541/17128/319757/21916/21955/278507	21
GO:0006109	BP	GO:0006109	regulation of carbohydrate metabolic process	28/1811	199/23355	0.0015631	0.0186667	0.0149955	100705/11548/12491/18605/17425/108682/208727/15378/15483/16002/30949/16847/16867/17978/18216/233571/18639/19013/19017/105787/108079/108099/18754/19091/19883/54403/20411/56490	28
GO:0043062	BP	GO:0043062	extracellular structure organization	39/1811	307/23355	0.00159859	0.0190089	0.0152704	239337/216725/223838/108154/77739/69538/12306/11787/11804/14595/76707/12818/12819/12822/12823/237759/77018/213945/12827/12829/94216/78892/234356/268780/23871/545291/15932/241226/380664/16917/71602/18073/80883/208177/20356/170441/64074/240725/21960	39
GO:0045229	BP	GO:0045229	external encapsulating structure organization	39/1811	307/23355	0.00159859	0.0190089	0.0152704	239337/216725/223838/108154/77739/69538/12306/11787/11804/14595/76707/12818/12819/12822/12823/237759/77018/213945/12827/12829/94216/78892/234356/268780/23871/545291/15932/241226/380664/16917/71602/18073/80883/208177/20356/170441/64074/240725/21960	39
GO:0051899	BP	GO:0051899	membrane depolarization	15/1811	83/23355	0.00165649	0.0196554	0.0157897	11735/12286/12288/12289/12300/14167/14805/15165/66725/83814/18216/18762/545622/110880/20273	15
GO:0042551	BP	GO:0042551	neuron maturation	12/1811	59/23355	0.00166016	0.019657	0.015791	210933/11735/66797/23859/14682/56637/66725/71751/319504/18189/74143/80297	12
GO:0007188	BP	GO:0007188	adenylate cyclase-modulating G protein-coupled receptor signaling pathway	30/1811	219/23355	0.00166678	0.0196934	0.0158203	210044/104111/11513/11515/210933/243277/13733/319387/11549/11548/381290/12289/14652/93896/14675/14677/14681/14682/14683/14773/108073/14823/15557/16867/18125/239283/18578/76089/319229/22095	30
GO:0071692	BP	GO:0071692	protein localization to extracellular region	48/1811	400/23355	0.00170636	0.0201184	0.0161617	69865/20927/101772/225372/12288/12289/12290/12638/12753/12894/13640/320051/14118/209630/14652/15378/15893/15932/16535/16847/16971/16973/268977/102635496/245049/18125/18189/18484/18575/18576/218461/18754/19275/19276/52055/67295/235442/56508/19726/116838/74370/27414/78808/207227/60510/272538/21844/26950	48
GO:0045664	BP	GO:0045664	regulation of neuron differentiation	32/1811	239/23355	0.00173911	0.0204585	0.0164349	11682/12053/240843/215378/214444/269784/13131/330938/13405/12934/27103/14048/14633/56637/110648/66725/71751/75104/192167/74143/18514/50779/20678/70834/21406/21413/21844/21858/22062/21417/11906/243937	32
GO:0035265	BP	GO:0035265	organ growth	29/1811	210/23355	0.00174256	0.0204585	0.0164349	100705/11549/11548/238161/12288/12818/13869/13982/14183/108655/56637/16002/16468/16526/16847/16917/17967/19013/19091/218772/19664/319757/56274/21388/23966/106628/22062/52357/22762	29
GO:0003002	BP	GO:0003002	regionalization	46/1811	380/23355	0.00176563	0.0205121	0.0164779	11308/108909/68146/207165/12590/12614/12808/68897/110350/23872/14183/14633/106633/245866/380614/16348/30841/16917/14725/16973/26407/269878/18504/18509/18514/18552/171395/18845/235542/19165/19206/19664/19699/66743/19876/268902/26564/20346/17128/66993/319757/24069/21415/73668/213081/22422	46
GO:0009886	BP	GO:0009886	post-embryonic animal morphogenesis	6/1811	18/23355	0.00177153	0.0205121	0.0164779	22295/170788/13508/14254/14683/433899	6
GO:0030033	BP	GO:0030033	microvillus assembly	6/1811	18/23355	0.00177153	0.0205121	0.0164779	15378/18805/27205/76089/192786/665113	6
GO:0032230	BP	GO:0032230	positive regulation of synaptic transmission, GABAergic	6/1811	18/23355	0.00177153	0.0205121	0.0164779	11549/13869/14805/192167/18754/21336	6
GO:0099150	BP	GO:0099150	regulation of postsynaptic specialization assembly	6/1811	18/23355	0.00177153	0.0205121	0.0164779	14804/16180/18189/18213/19266/217692	6
GO:0050908	BP	GO:0050908	detection of light stimulus involved in visual perception	7/1811	24/23355	0.00177661	0.0205121	0.0164779	50769/24115/12298/170788/20356/20357/22157	7
GO:0050962	BP	GO:0050962	detection of light stimulus involved in sensory perception	7/1811	24/23355	0.00177661	0.0205121	0.0164779	50769/24115/12298/170788/20356/20357/22157	7
GO:1902683	BP	GO:1902683	regulation of receptor localization to synapse	7/1811	24/23355	0.00177661	0.0205121	0.0164779	23888/56637/545156/50791/18762/56508/665113	7
GO:0007030	BP	GO:0007030	Golgi organization	20/1811	127/23355	0.00183168	0.0210285	0.0168928	100986/71435/54126/56298/192197/76707/338337/233824/13430/69190/110350/209462/66725/83679/89867/64009/109181/98910/75909/53611	20
GO:0043268	BP	GO:0043268	positive regulation of potassium ion transport	11/1811	52/23355	0.00183645	0.0210285	0.0168928	20927/238161/432442/100986/109676/13383/13430/13483/16535/19091/24012	11
GO:0051489	BP	GO:0051489	regulation of filopodium assembly	11/1811	52/23355	0.00183645	0.0210285	0.0168928	69710/192197/12345/103967/667663/329421/192167/18189/243725/29819/23963	11
GO:0097720	BP	GO:0097720	calcineurin-mediated signaling	11/1811	52/23355	0.00183645	0.0210285	0.0168928	238161/381290/100072/76469/14200/56637/18018/18019/211323/53901/20495	11
GO:0061178	BP	GO:0061178	regulation of insulin secretion involved in cellular response to glucose stimulus	15/1811	84/23355	0.00187481	0.0214236	0.0172102	101772/12289/12290/12638/13640/16847/16971/16973/18189/18575/18576/218461/18754/21844/26950	15
GO:0035315	BP	GO:0035315	hair cell differentiation	12/1811	60/23355	0.00193129	0.0219788	0.0176562	11941/22295/433899/16531/171166/667663/329421/11994/102502/19664/13409/22283	12
GO:0042446	BP	GO:0042446	hormone biosynthetic process	12/1811	60/23355	0.00193129	0.0219788	0.0176562	107626/12286/13132/13360/13370/16001/16002/16867/218461/19017/94224/21819	12
GO:0021695	BP	GO:0021695	cerebellar cortex development	13/1811	68/23355	0.00195806	0.0221965	0.0178311	11941/12286/330938/14633/14804/93688/78286/18189/68703/19883/56747/319757/73668	13
GO:0021987	BP	GO:0021987	cerebral cortex development	18/1811	110/23355	0.00195839	0.0221965	0.0178311	12558/13131/69601/244667/330938/56637/18212/218194/18795/19699/19876/20563/319757/14270/320165/57752/76510/328365	18
GO:1905954	BP	GO:1905954	positive regulation of lipid localization	20/1811	128/23355	0.00201608	0.0227144	0.0182471	100705/14081/12306/11980/50769/12491/12683/13132/12934/67484/14812/56489/16971/26399/18216/18979/19206/12394/72759/21943	20
GO:0002026	BP	GO:0002026	regulation of the force of heart contraction	8/1811	31/23355	0.00201634	0.0227144	0.0182471	11549/11548/381290/18125/242202/18750/20191/20541	8
GO:1904738	BP	GO:1904738	vascular associated smooth muscle cell migration	8/1811	31/23355	0.00201634	0.0227144	0.0182471	238130/68813/67299/29875/16971/18552/19091/319757	8
GO:0030902	BP	GO:0030902	hindbrain development	25/1811	174/23355	0.00202652	0.0227199	0.0182515	68146/11941/12286/12386/13131/330938/50768/14402/14633/14804/16001/30841/93688/110648/16917/78286/18189/71365/18845/68703/19883/56747/319757/73668/94187	25
GO:0060562	BP	GO:0060562	epithelial tube morphogenesis	47/1811	393/23355	0.00202759	0.0227199	0.0182515	239337/11600/68146/14595/12505/12614/12808/94109/50768/13383/13982/14048/14183/14254/14260/14633/381157/245866/30841/269152/16772/14725/16973/26409/269878/270685/18018/74143/18504/18514/241035/19206/71461/19664/19876/20191/20356/27428/20563/17128/319757/74392/243362/56274/24069/21676/329795	47
GO:0098657	BP	GO:0098657	import into cell	34/1811	261/23355	0.00202907	0.0227199	0.0182515	14081/12288/12300/54377/12491/65969/13383/13430/103967/270028/14360/14816/269994/232227/16519/16522/14725/18125/18216/20495/57738/20502/20518/20519/170441/104245/26570/50934/20541/226999/236727/64009/104015/69727	34
GO:0070528	BP	GO:0070528	protein kinase C signaling	9/1811	38/23355	0.00205965	0.0230159	0.0184894	110789/11549/12345/110197/98432/18755/18762/56747/209012	9
GO:0010970	BP	GO:0010970	transport along microtubule	24/1811	165/23355	0.00208606	0.0232572	0.0186832	78933/71435/12217/23859/13518/13426/110350/17281/106633/245866/16553/16572/17756/17760/17762/56273/18762/80718/214585/29819/81907/67095/73668/213081	24
GO:0042445	BP	GO:0042445	hormone metabolic process	28/1811	203/23355	0.00210674	0.0232572	0.0186832	107626/12286/53419/54381/13132/13360/13370/68897/13982/114664/15925/16001/16002/16522/16531/16867/18549/18552/218461/665270/19017/19699/20394/30953/20502/94224/21819/394432	28
GO:0021860	BP	GO:0021860	pyramidal neuron development	5/1811	13/23355	0.00211467	0.0232572	0.0186832	70762/244667/14183/94229/328365	5
GO:0045161	BP	GO:0045161	neuronal ion channel clustering	5/1811	13/23355	0.00211467	0.0232572	0.0186832	11735/66797/23859/319504/80297	5
GO:0071380	BP	GO:0071380	cellular response to prostaglandin E stimulus	5/1811	13/23355	0.00211467	0.0232572	0.0186832	14683/233571/105787/108079/18754	5
GO:0097090	BP	GO:0097090	presynaptic membrane organization	5/1811	13/23355	0.00211467	0.0232572	0.0186832	331461/243499/192167/18189/19266	5
GO:0099159	BP	GO:0099159	regulation of modification of postsynaptic structure	5/1811	13/23355	0.00211467	0.0232572	0.0186832	56637/16443/545156/17919/21844	5
GO:2001223	BP	GO:2001223	negative regulation of neuron migration	5/1811	13/23355	0.00211467	0.0232572	0.0186832	13869/56637/211323/18183/14270	5
GO:0032147	BP	GO:0032147	activation of protein kinase activity	32/1811	242/23355	0.00212722	0.0233491	0.018757	11682/11600/13132/69601/13383/14118/404194/14816/108071/15378/16706/66725/23938/26399/71751/26407/338372/26390/211323/18213/237542/74055/18762/73137/70834/56274/330177/21943/665113/71943/22062/22422	32
GO:0051896	BP	GO:0051896	regulation of protein kinase B signaling	25/1811	175/23355	0.00219421	0.0239922	0.0192736	11600/242248/13383/404194/16001/16002/234515/16443/68421/14725/50791/50490/211323/18189/18212/18213/237542/98432/241035/19013/107746/20356/74392/56274/21943	25
GO:0042063	BP	GO:0042063	gliogenesis	42/1811	343/23355	0.00219848	0.0239922	0.0192736	20927/54126/20238/12558/12571/170788/13131/69601/244667/13405/227325/13853/20336/14531/76527/16847/16971/14725/17096/17181/211323/18212/18213/93742/18504/18755/19699/26563/26564/319757/20678/20679/14270/104015/23966/21844/22062/22066/73668/209012/245880/328365	42
GO:0048747	BP	GO:0048747	muscle fiber development	14/1811	77/23355	0.00219874	0.0239922	0.0192736	12298/12345/13405/227325/208727/79221/26556/74103/18175/20190/24052/20541/319757/278507	14
GO:0051592	BP	GO:0051592	response to calcium ion	20/1811	129/23355	0.00221593	0.0241324	0.0193863	110789/74020/15165/26556/29875/16510/16531/107589/192167/18189/11994/18575/105787/108079/20191/78830/66722/20866/20980/60510	20
GO:0002067	BP	GO:0002067	glandular epithelial cell differentiation	12/1811	61/23355	0.00223765	0.0242541	0.0194841	12558/12571/12638/12753/14183/108655/74123/15378/218624/218772/19726/319757	12
GO:0046847	BP	GO:0046847	filopodium assembly	13/1811	69/23355	0.00224454	0.0242541	0.0194841	69710/192197/12345/103967/667663/329421/192167/18189/243725/219140/14270/29819/23963	13
GO:0050771	BP	GO:0050771	negative regulation of axonogenesis	13/1811	69/23355	0.00224454	0.0242541	0.0194841	213084/13131/239667/13844/320027/17756/20346/108151/20356/20357/214968/20563/21960	13
GO:0086003	BP	GO:0086003	cardiac muscle cell contraction	13/1811	69/23355	0.00224454	0.0242541	0.0194841	238161/109676/12288/12289/216033/13383/140492/16535/83814/18578/238871/20191/24052	13
GO:0008589	BP	GO:0008589	regulation of smoothened signaling pathway	16/1811	94/23355	0.00225223	0.0242901	0.0195129	110350/18605/50758/14183/14633/106633/380614/269878/19206/19883/12393/64706/319757/24069/73668/22422	16
GO:0007162	BP	GO:0007162	negative regulation of cell adhesion	37/1811	293/23355	0.00229914	0.024748	0.0198808	60595/230959/11600/11856/12927/192197/12053/12400/12505/12554/235431/13131/50768/13383/13508/114873/13640/83964/16971/17120/23938/94212/58205/18576/242202/208177/18845/243743/54712/27205/19013/19091/12394/20356/74392/20745/21960	37
GO:0048266	BP	GO:0048266	behavioral response to pain	7/1811	25/23355	0.00230419	0.0247545	0.019886	12286/12290/14805/14812/545156/12394/21336	7
GO:0003300	BP	GO:0003300	cardiac muscle hypertrophy	17/1811	103/23355	0.00234623	0.0250609	0.0201322	11549/11548/238161/381290/12818/108655/56637/16468/242202/18585/19013/18750/19091/20191/17128/21844/106628	17
GO:0009953	BP	GO:0009953	dorsal/ventral pattern formation	17/1811	103/23355	0.00234623	0.0250609	0.0201322	108909/68146/68897/110350/14633/245866/380614/16917/26407/18509/19165/19206/66743/319757/24069/73668/213081	17
GO:0033555	BP	GO:0033555	multicellular organismal response to stress	17/1811	103/23355	0.00234623	0.0250609	0.0201322	382543/241118/12286/12290/14708/14805/14812/108073/545156/17967/18125/18143/218461/19699/12394/21336/69727	17
GO:0060122	BP	GO:0060122	inner ear receptor cell stereocilium organization	10/1811	46/23355	0.00235887	0.0251477	0.0202019	110789/11941/22295/433899/667663/329421/11994/102502/109181/22095	10
GO:1904427	BP	GO:1904427	positive regulation of calcium ion transmembrane transport	15/1811	86/23355	0.00238366	0.0253634	0.0203752	238161/109676/12288/12289/12298/14169/16867/319239/18216/233571/234779/20191/20840/20866/116873	15
GO:0014051	BP	GO:0014051	gamma-aminobutyric acid secretion	6/1811	19/23355	0.0024208	0.0257094	0.0206531	319924/12286/12298/14805/18216/22066	6
GO:0007631	BP	GO:0007631	feeding behavior	20/1811	130/23355	0.00243223	0.0257816	0.0207111	11804/50769/100503572/12491/12804/12894/27103/404194/14652/14812/108073/16847/320840/319239/18212/73094/21336/73668/69727/50518	20
GO:0048592	BP	GO:0048592	eye morphogenesis	26/1811	186/23355	0.00246817	0.0261128	0.0209772	50769/170788/13508/270190/13844/270120/14254/15165/30841/16973/214058/18212/18504/235542/19274/218772/77945/330222/110380/29819/100121/23965/21834/17364/22157/21417	26
GO:0032228	BP	GO:0032228	regulation of synaptic transmission, GABAergic	9/1811	39/23355	0.00249611	0.0263584	0.0211744	11549/13869/14805/192167/227120/224860/18754/21336/69727	9
GO:0021904	BP	GO:0021904	dorsal/ventral neural tube patterning	8/1811	32/23355	0.0025082	0.0263859	0.0211966	14633/18509/19165/19206/66743/319757/24069/213081	8
GO:0051497	BP	GO:0051497	negative regulation of stress fiber assembly	8/1811	32/23355	0.0025082	0.0263859	0.0211966	69710/11856/68178/76707/235431/50768/208177/243725	8
GO:0042491	BP	GO:0042491	inner ear auditory receptor cell differentiation	11/1811	54/23355	0.00252323	0.026494	0.0212834	11941/22295/433899/16531/171166/667663/329421/11994/102502/19664/13409	11
GO:0050885	BP	GO:0050885	neuromuscular process controlling balance	13/1811	70/23355	0.00256457	0.0268772	0.0215913	109934/382543/11804/11941/12286/100072/22295/16531/18189/11994/218461/268859/21960	13
GO:0010812	BP	GO:0010812	negative regulation of cell-substrate adhesion	12/1811	62/23355	0.00258254	0.0269135	0.0216204	60595/230959/11856/12927/192197/12053/235431/50768/13640/16971/208177/20745	12
GO:0050982	BP	GO:0050982	detection of mechanical stimulus	12/1811	62/23355	0.00258254	0.0269135	0.0216204	110789/11418/11941/14360/14812/14823/16398/11994/667742/171395/76645/13409	12
GO:1903078	BP	GO:1903078	positive regulation of protein localization to plasma membrane	12/1811	62/23355	0.00258254	0.0269135	0.0216204	381290/13383/269109/13483/13844/16971/17919/18189/102502/20411/20840/20908	12
GO:0001657	BP	GO:0001657	ureteric bud development	17/1811	104/23355	0.00260644	0.0269607	0.0216583	12359/12505/13383/14048/14183/14260/381157/269152/18504/18514/19206/218772/268902/20563/17128/17129/319757	17
GO:0055006	BP	GO:0055006	cardiac cell development	17/1811	104/23355	0.00260644	0.0269607	0.0216583	11549/11548/238161/225638/12818/14200/225288/108655/56637/74103/18175/19013/19091/24052/20541/17128/106628	17
GO:0072163	BP	GO:0072163	mesonephric epithelium development	17/1811	104/23355	0.00260644	0.0269607	0.0216583	12359/12505/13383/14048/14183/14260/381157/269152/18504/18514/19206/218772/268902/20563/17128/17129/319757	17
GO:0072164	BP	GO:0072164	mesonephric tubule development	17/1811	104/23355	0.00260644	0.0269607	0.0216583	12359/12505/13383/14048/14183/14260/381157/269152/18504/18514/19206/218772/268902/20563/17128/17129/319757	17
GO:0002790	BP	GO:0002790	peptide secretion	51/1811	441/23355	0.0027349	0.0282364	0.0226831	69865/20927/101772/225372/54126/12288/12289/12290/12638/12753/12894/13640/320051/209630/14652/15378/15893/15932/16443/545156/16535/16847/16971/16973/102635496/245049/18125/18189/18484/18575/18576/218461/18754/19275/19276/52055/67295/235442/56508/19726/116838/74370/27414/20502/78808/207227/60510/272538/21844/21943/26950	51
GO:0021915	BP	GO:0021915	neural tube development	27/1811	197/23355	0.00273992	0.0282364	0.0226831	68146/12614/12808/50768/14633/106633/245866/380614/217837/30841/14725/26409/270685/74143/18504/18509/18845/19165/19206/71461/66743/27428/319757/74392/56274/24069/213081	27
GO:0007605	BP	GO:0007605	sensory perception of sound	35/1811	276/23355	0.00276831	0.0284762	0.0228758	110789/11418/11941/12289/67501/22295/244682/13367/225055/14402/108073/433899/16531/269629/240411/14725/171166/71960/667663/329421/17922/78286/17993/246190/628870/11994/192190/26563/20273/109205/80297/21834/13409/252974/22283	35
GO:0050974	BP	GO:0050974	detection of mechanical stimulus involved in sensory perception	10/1811	47/23355	0.00279173	0.0286114	0.0229843	110789/11418/11941/14360/14812/14823/16398/11994/667742/13409	10
GO:0120163	BP	GO:0120163	negative regulation of cold-induced thermogenesis	10/1811	47/23355	0.00279173	0.0286114	0.0229843	66082/12683/67299/240028/26399/230598/227120/224860/19664/94187	10
GO:0007229	BP	GO:0007229	integrin-mediated signaling pathway	16/1811	96/23355	0.00280825	0.0287278	0.0230779	12927/13132/53618/23880/14389/319480/16398/241226/104099/381924/16420/223272/16774/18552/170441/57257	16
GO:0051224	BP	GO:0051224	negative regulation of protein transport	21/1811	141/23355	0.00287569	0.0293637	0.0235887	20927/11600/12021/12491/209630/15378/15932/16535/66725/76273/18125/216440/18575/18576/218461/52055/74370/27414/207227/68889/26950	21
GO:0015800	BP	GO:0015800	acidic amino acid transport	13/1811	71/23355	0.00292097	0.0297349	0.0238869	319924/12934/13853/14812/14816/108073/231549/18212/18216/19091/114644/78830/26570	13
GO:0048016	BP	GO:0048016	inositol phosphate-mediated signaling	11/1811	55/23355	0.0029371	0.0297349	0.0238869	238161/381290/100072/76469/14200/56637/18018/18019/211323/53901/20495	11
GO:0050775	BP	GO:0050775	positive regulation of dendrite morphogenesis	11/1811	55/23355	0.0029371	0.0297349	0.0238869	213084/13048/13631/331461/545156/17919/74143/19266/19699/29819/21844	11
GO:0022037	BP	GO:0022037	metencephalon development	19/1811	123/23355	0.00293876	0.0297349	0.0238869	11941/12286/13131/330938/14402/14633/14804/16001/93688/110648/16917/78286/18189/71365/68703/19883/56747/319757/73668	19
GO:0043500	BP	GO:0043500	muscle adaptation	19/1811	123/23355	0.00293876	0.0297349	0.0238869	11549/238161/381290/76469/108655/56637/57080/208727/16468/17993/18018/242202/18585/19013/18750/17128/21676/21955/106628	19
GO:0060999	BP	GO:0060999	positive regulation of dendritic spine development	12/1811	63/23355	0.00296943	0.0299303	0.0240439	13048/13631/16443/545156/192167/211323/74143/243725/19699/210274/29819/21844	12
GO:0010639	BP	GO:0010639	negative regulation of organelle organization	43/1811	359/23355	0.00297421	0.0299303	0.0240439	72113/69710/11856/12345/12449/214444/68178/76707/235431/12386/50768/13430/13548/78798/13982/14026/14183/225288/30949/66725/17120/17756/17762/260315/74143/18613/208177/213556/19017/243725/20112/110380/20563/17128/103677/74392/20257/210789/75712/329795/21916/74493/71943	43
GO:0019216	BP	GO:0019216	regulation of lipid metabolic process	43/1811	359/23355	0.00297421	0.0299303	0.0240439	66082/100705/11682/11813/11814/233912/12491/264064/12683/12894/13132/69601/13360/68801/13982/14254/15378/16001/16002/16531/16867/14245/17096/102635496/74302/18576/218461/19013/19017/105787/108079/108099/18754/19091/19883/100502698/319229/20411/20660/21834/22325/57257/56490	43
GO:0060420	BP	GO:0060420	regulation of heart growth	15/1811	88/23355	0.00300184	0.0300008	0.0241005	100705/238161/12818/13869/14183/108655/16468/16526/17967/19013/19664/21388/106628/22062/22762	15
GO:0001881	BP	GO:0001881	receptor recycling	9/1811	40/23355	0.00300277	0.0300008	0.0241005	12306/69710/99371/13132/14799/16558/231876/19165/20660	9
GO:0007212	BP	GO:0007212	dopamine receptor signaling pathway	9/1811	40/23355	0.00300277	0.0300008	0.0241005	11682/14675/14681/14682/14683/14697/66725/18197/19739	9
GO:0099590	BP	GO:0099590	neurotransmitter receptor internalization	9/1811	40/23355	0.00300277	0.0300008	0.0241005	12300/54377/13430/103967/269994/232227/64009/104015/69727	9
GO:0072006	BP	GO:0072006	nephron development	22/1811	151/23355	0.00305996	0.0305076	0.0245076	11600/12505/12829/13383/13869/14048/14260/381157/269152/67703/71602/18073/103468/18504/18514/74055/19206/19277/17128/319757/240725/22422	22
GO:0010882	BP	GO:0010882	regulation of cardiac muscle contraction by calcium ion signaling	5/1811	14/23355	0.00308091	0.0305076	0.0245076	109676/13405/208727/20191/20541	5
GO:0045760	BP	GO:0045760	positive regulation of action potential	5/1811	14/23355	0.00308091	0.0305076	0.0245076	11549/11735/70357/56508/21336	5
GO:0046886	BP	GO:0046886	positive regulation of hormone biosynthetic process	5/1811	14/23355	0.00308091	0.0305076	0.0245076	13132/16001/16002/16867/19017	5
GO:0052695	BP	GO:0052695	cellular glucuronidation	5/1811	14/23355	0.00308091	0.0305076	0.0245076	18754/394430/394435/394432/394434	5
GO:0048841	BP	GO:0048841	regulation of axon extension involved in axon guidance	8/1811	33/23355	0.00308912	0.0305346	0.0245293	13508/269878/243743/20346/108151/20356/20357/214968	8
GO:0048562	BP	GO:0048562	embryonic organ morphogenesis	40/1811	329/23355	0.00312892	0.0308731	0.0248012	109934/68146/11941/50769/22295/12614/13383/114873/13844/14048/14183/14633/14683/106633/245866/241226/30841/320398/269878/270685/667663/329421/21906/18504/11994/102502/71461/218772/19664/26564/12393/20191/319757/109205/24069/21676/22095/72747/213081/21417	40
GO:0014855	BP	GO:0014855	striated muscle cell proliferation	14/1811	80/23355	0.00317641	0.0312309	0.0250887	11600/270190/13869/14183/108655/16468/16526/16646/17967/19664/21388/23966/22062/22762	14
GO:0055021	BP	GO:0055021	regulation of cardiac muscle tissue growth	14/1811	80/23355	0.00317641	0.0312309	0.0250887	238161/12818/13869/14183/108655/16468/16526/17967/19013/19664/21388/106628/22062/22762	14
GO:0090263	BP	GO:0090263	positive regulation of canonical Wnt signaling pathway	17/1811	106/23355	0.00319923	0.0313999	0.0252244	244667/13607/14183/103978/110648/233328/66725/235542/71461/19664/66743/26564/56505/20356/74493/73668/17847	17
GO:0048167	BP	GO:0048167	regulation of synaptic plasticity	44/1811	371/23355	0.00322807	0.0316272	0.025407	66082/11941/12308/382056/18163/320127/27103/13844/111173/238988/14169/14799/14804/14805/14811/14812/108071/56637/545156/140492/17762/192167/18125/18212/243725/18762/19165/76089/19417/19699/116837/116838/319229/210274/380702/217692/94229/81840/66673/214585/29819/20908/21960/208898	44
GO:0009306	BP	GO:0009306	protein secretion	46/1811	392/23355	0.00324505	0.0317377	0.0254958	69865/20927/101772/225372/12288/12289/12290/12638/12753/12894/13640/320051/209630/14652/15378/15893/15932/16535/16847/16971/16973/102635496/245049/18125/18189/18484/18575/18576/218461/18754/19275/19276/52055/67295/235442/56508/19726/116838/74370/27414/78808/207227/60510/272538/21844/26950	46
GO:0030517	BP	GO:0030517	negative regulation of axon extension	10/1811	48/23355	0.00328574	0.0320792	0.0257701	213084/239667/17756/20346/108151/20356/20357/214968/20563/21960	10
GO:0008064	BP	GO:0008064	regulation of actin polymerization or depolymerization	26/1811	190/23355	0.00331503	0.0323085	0.0259544	242894/73910/66898/12345/12386/13383/14026/14158/225288/14260/544963/57748/54631/18613/213556/243725/277360/18754/20356/110380/20563/66616/74392/23963/21916/245880	26
GO:0035303	BP	GO:0035303	regulation of dephosphorylation	24/1811	171/23355	0.00335527	0.0326049	0.0261925	215821/100072/76469/50768/23859/13853/223254/67769/433899/29875/16398/14245/50791/107895/74302/338367/170826/228852/72930/243819/71474/241919/68188/243274	24
GO:0046683	BP	GO:0046683	response to organophosphorus	15/1811	89/23355	0.00335716	0.0326049	0.0261925	238161/432442/12638/15165/16438/16439/16535/17993/233571/54611/234779/107746/76089/20190/20541	15
GO:0060119	BP	GO:0060119	inner ear receptor cell development	12/1811	64/23355	0.00340197	0.0329112	0.0264386	110789/11941/22295/14402/433899/667663/329421/11994/102502/13409/109181/22095	12
GO:0086001	BP	GO:0086001	cardiac muscle cell action potential	11/1811	56/23355	0.00340386	0.0329112	0.0264386	109676/11735/12288/12289/216033/13383/13405/140492/16535/83814/20191	11
GO:0035592	BP	GO:0035592	establishment of protein localization to extracellular region	46/1811	393/23355	0.00340645	0.0329112	0.0264386	69865/20927/101772/225372/12288/12289/12290/12638/12753/12894/13640/320051/209630/14652/15378/15893/15932/16535/16847/16971/16973/102635496/245049/18125/18189/18484/18575/18576/218461/18754/19275/19276/52055/67295/235442/56508/19726/116838/74370/27414/78808/207227/60510/272538/21844/26950	46
GO:0001823	BP	GO:0001823	mesonephros development	17/1811	107/23355	0.00353507	0.0339651	0.0272852	12359/12505/13383/14048/14183/14260/381157/269152/18504/18514/19206/218772/268902/20563/17128/17129/319757	17
GO:0014897	BP	GO:0014897	striated muscle hypertrophy	17/1811	107/23355	0.00353507	0.0339651	0.0272852	11549/11548/238161/381290/12818/108655/56637/16468/242202/18585/19013/18750/19091/20191/17128/21844/106628	17
GO:0062012	BP	GO:0062012	regulation of small molecule metabolic process	42/1811	352/23355	0.00353628	0.0339651	0.0272852	100705/11548/11813/381290/12286/12491/69634/12894/13132/13360/68801/18605/17425/108682/208727/15378/16002/16531/30949/16847/16867/102635496/17978/20602/18125/18216/233571/18639/98496/19013/19017/105787/108079/108099/18754/19091/19883/54403/26570/20411/21834/56490	42
GO:0051091	BP	GO:0051091	positive regulation of DNA-binding transcription factor activity	33/1811	260/23355	0.00353994	0.0339651	0.0272852	12289/227541/108723/170720/12359/12491/12753/382056/230073/13982/66930/14158/208727/16180/57748/16973/71268/17002/71751/74039/19017/170826/18751/18755/18762/19699/26563/108116/319757/56274/21941/21943/76510	33
GO:0051090	BP	GO:0051090	regulation of DNA-binding transcription factor activity	48/1811	415/23355	0.00356406	0.0341377	0.0274238	11746/107392/12289/227541/108723/170720/12359/12491/12753/382056/69601/230073/27103/18605/13982/66930/14158/208727/15378/16001/16180/57748/16973/71268/17002/23938/71751/74039/268857/18514/56273/241035/19017/170826/18751/18755/18762/19206/19699/26563/108116/319757/56274/24069/209361/21941/21943/76510	48
GO:0046461	BP	GO:0046461	neutral lipid catabolic process	9/1811	41/23355	0.00358715	0.034241	0.0275068	76192/66082/11813/11814/269060/15450/665270/18947/20660	9
GO:0046464	BP	GO:0046464	acylglycerol catabolic process	9/1811	41/23355	0.00358715	0.034241	0.0275068	76192/66082/11813/11814/269060/15450/665270/18947/20660	9
GO:1902904	BP	GO:1902904	negative regulation of supramolecular fiber organization	24/1811	172/23355	0.00361984	0.0344939	0.0277099	69710/11856/12345/68178/76707/235431/12386/50768/13548/78798/14026/225288/17756/260315/18613/208177/213556/243725/110380/20563/17128/74392/20257/21916	24
GO:0010038	BP	GO:0010038	response to metal ion	35/1811	281/23355	0.00371159	0.0349623	0.0280862	20927/11513/110789/11735/74020/23859/14402/268566/14811/56637/15165/26556/29875/16510/16531/226413/66725/17762/107589/17967/83814/192167/18189/18484/11994/18575/234779/105787/108079/20191/78830/66722/20866/20980/60510	35
GO:0030201	BP	GO:0030201	heparan sulfate proteoglycan metabolic process	7/1811	27/23355	0.00371298	0.0349623	0.0280862	319415/50787/15450/83398/235534/240725/233781	7
GO:0032528	BP	GO:0032528	microvillus organization	7/1811	27/23355	0.00371298	0.0349623	0.0280862	15378/18805/102502/27205/76089/192786/665113	7
GO:0046473	BP	GO:0046473	phosphatidic acid metabolic process	7/1811	27/23355	0.00371298	0.0349623	0.0280862	217480/110197/380921/320127/15450/14245/18805	7
GO:0050995	BP	GO:0050995	negative regulation of lipid catabolic process	7/1811	27/23355	0.00371298	0.0349623	0.0280862	100705/11682/11814/12683/18576/105787/20660	7
GO:0061003	BP	GO:0061003	positive regulation of dendritic spine morphogenesis	7/1811	27/23355	0.00371298	0.0349623	0.0280862	13048/13631/545156/74143/19699/29819/21844	7
GO:1901018	BP	GO:1901018	positive regulation of potassium ion transmembrane transporter activity	7/1811	27/23355	0.00371298	0.0349623	0.0280862	20927/238161/432442/100986/109676/13430/19091	7
GO:0021591	BP	GO:0021591	ventricular system development	8/1811	34/23355	0.00376944	0.0352553	0.0283216	244653/30841/75050/76089/214968/26570/73668/209012	8
GO:0035640	BP	GO:0035640	exploration behavior	8/1811	34/23355	0.00376944	0.0352553	0.0283216	12661/14402/66725/268890/18754/210274/94229/21960	8
GO:0048013	BP	GO:0048013	ephrin receptor signaling pathway	8/1811	34/23355	0.00376944	0.0352553	0.0283216	77531/13640/270190/13844/19664/217692/268996/21844	8
GO:0099563	BP	GO:0099563	modification of synaptic structure	8/1811	34/23355	0.00376944	0.0352553	0.0283216	12386/70598/56637/16443/545156/17919/21844/245880	8
GO:0098656	BP	GO:0098656	anion transmembrane transport	49/1811	427/23355	0.00380588	0.0355364	0.0285475	18671/14081/101772/243634/320091/24115/74741/12491/12638/68897/18605/13853/13869/13982/14402/14407/14657/14658/14816/108071/68421/14725/433926/231549/18216/237542/56273/98496/18750/18751/94279/20495/114644/27411/57738/20502/20518/78830/170441/117591/625098/268706/242773/104245/26570/50934/20411/170829/22612	49
GO:0002066	BP	GO:0002066	columnar/cuboidal epithelial cell development	10/1811	49/23355	0.00384677	0.0357981	0.0287576	12558/12571/12638/12753/15378/218772/19726/19886/27428/319757	10
GO:0042755	BP	GO:0042755	eating behavior	10/1811	49/23355	0.00384677	0.0357981	0.0287576	50769/100503572/12491/12894/404194/16847/319239/73094/21336/73668	10
GO:0008286	BP	GO:0008286	insulin receptor signaling pathway	19/1811	126/23355	0.00386433	0.0359015	0.0288407	66898/12927/74741/18605/14158/56637/16001/16002/68421/74143/237542/98496/18795/105787/18750/18751/18762/20411/20660	19
GO:1902305	BP	GO:1902305	regulation of sodium ion transmembrane transport	12/1811	65/23355	0.00388393	0.0360235	0.0289387	11735/381290/215748/13405/13430/14167/14169/94253/83814/18125/18795/545622	12
GO:0070085	BP	GO:0070085	glycosylation	28/1811	212/23355	0.003946	0.0365383	0.0293523	333424/66789/26877/93961/14595/338337/233824/53618/14348/231050/271786/233733/108148/108150/270049/67569/107895/94229/20441/20447/26938/20449/241230/387314/278279/109181/80286/268880	28
GO:0030177	BP	GO:0030177	positive regulation of Wnt signaling pathway	20/1811	136/23355	0.00413663	0.0382398	0.0307191	13132/244667/330938/13607/14183/103978/110648/233328/66725/235542/71461/19664/66743/26564/56505/20356/240725/74493/73668/17847	20
GO:0010721	BP	GO:0010721	negative regulation of cell development	27/1811	203/23355	0.00416789	0.0384649	0.0309	20927/60595/12927/213084/12638/13131/239667/13640/13844/14118/50754/320027/56637/320191/17756/18213/76089/20346/108151/20356/20357/214968/230126/20563/20660/21960/22422	27
GO:0048593	BP	GO:0048593	camera-type eye morphogenesis	22/1811	155/23355	0.00422416	0.0387311	0.0311138	50769/170788/13508/270190/13844/270120/14254/15165/30841/16973/214058/18212/18504/19274/77945/330222/110380/100121/23965/21834/17364/21417	22
GO:0014808	BP	GO:0014808	release of sequestered calcium ion into cytosol by sarcoplasmic reticulum	6/1811	21/23355	0.00423393	0.0387311	0.0311138	109676/13405/238871/20190/20191/20541	6
GO:0048791	BP	GO:0048791	calcium ion-regulated exocytosis of neurotransmitter	6/1811	21/23355	0.00423393	0.0387311	0.0311138	12286/27062/116837/116838/20980/208898	6
GO:0021879	BP	GO:0021879	forebrain neuron differentiation	13/1811	74/23355	0.00423898	0.0387311	0.0311138	70762/244667/13869/14183/14682/76089/19876/268902/20346/94229/20563/328365/67263	13
GO:0097009	BP	GO:0097009	energy homeostasis	9/1811	42/23355	0.00425708	0.0387311	0.0311138	100705/11682/12491/382056/16847/19017/105787/108079/73094	9
GO:0006476	BP	GO:0006476	protein deacetylation	16/1811	100/23355	0.00426286	0.0387311	0.0311138	80748/12053/107392/13548/14272/320365/208727/79221/81703/14245/66725/17762/116871/20602/105787/108079	16
GO:0014896	BP	GO:0014896	muscle hypertrophy	17/1811	109/23355	0.00429426	0.0387311	0.0311138	11549/11548/238161/381290/12818/108655/56637/16468/242202/18585/19013/18750/19091/20191/17128/21844/106628	17
GO:1905477	BP	GO:1905477	positive regulation of protein localization to membrane	17/1811	109/23355	0.00429426	0.0387311	0.0311138	11735/381290/74741/12300/13383/269109/13483/13844/14360/16971/17919/18189/59020/102502/20411/20840/20908	17
GO:0006063	BP	GO:0006063	uronic acid metabolic process	5/1811	15/23355	0.00432897	0.0387311	0.0311138	18754/394430/394435/394432/394434	5
GO:0006857	BP	GO:0006857	oligopeptide transport	5/1811	15/23355	0.00432897	0.0387311	0.0311138	114644/57738/19879/26570/108116	5
GO:0019585	BP	GO:0019585	glucuronate metabolic process	5/1811	15/23355	0.00432897	0.0387311	0.0311138	18754/394430/394435/394432/394434	5
GO:0042953	BP	GO:0042953	lipoprotein transport	5/1811	15/23355	0.00432897	0.0387311	0.0311138	11813/11814/12491/65969/14725	5
GO:0046835	BP	GO:0046835	carbohydrate phosphorylation	5/1811	15/23355	0.00432897	0.0387311	0.0311138	13853/75578/69976/217837/18639	5
GO:0051645	BP	GO:0051645	Golgi localization	5/1811	15/23355	0.00432897	0.0387311	0.0311138	71435/13131/320191/70573/78610	5
GO:0086014	BP	GO:0086014	atrial cardiac muscle cell action potential	5/1811	15/23355	0.00432897	0.0387311	0.0311138	109676/12288/140492/16535/20191	5
GO:0086026	BP	GO:0086026	atrial cardiac muscle cell to AV node cell signaling	5/1811	15/23355	0.00432897	0.0387311	0.0311138	109676/12288/140492/16535/20191	5
GO:0086066	BP	GO:0086066	atrial cardiac muscle cell to AV node cell communication	5/1811	15/23355	0.00432897	0.0387311	0.0311138	109676/12288/140492/16535/20191	5
GO:0090042	BP	GO:0090042	tubulin deacetylation	5/1811	15/23355	0.00432897	0.0387311	0.0311138	14272/320365/17762/105787/108079	5
GO:0099527	BP	GO:0099527	postsynapse to nucleus signaling pathway	5/1811	15/23355	0.00432897	0.0387311	0.0311138	11308/77531/382056/16646/211323	5
GO:0048041	BP	GO:0048041	focal adhesion assembly	14/1811	83/23355	0.00448379	0.0400092	0.0321405	11856/192197/76707/235431/50768/13640/14260/29875/16398/77569/16971/244895/208177/20411	14
GO:0006493	BP	GO:0006493	protein O-linked glycosylation	11/1811	58/23355	0.00451496	0.0400092	0.0321405	333424/231050/271786/233733/108148/108150/270049/241230/387314/278279/268880	11
GO:0051591	BP	GO:0051591	response to cAMP	11/1811	58/23355	0.00451496	0.0400092	0.0321405	238161/432442/12638/15165/16438/16439/16535/17993/107746/76089/20541	11
GO:0051932	BP	GO:0051932	synaptic transmission, GABAergic	11/1811	58/23355	0.00451496	0.0400092	0.0321405	11549/13869/14402/14407/14805/192167/227120/224860/18754/21336/69727	11
GO:1903350	BP	GO:1903350	response to dopamine	11/1811	58/23355	0.00451496	0.0400092	0.0321405	11682/13430/14675/14681/14682/14683/14697/15557/66725/18197/19739	11
GO:1903351	BP	GO:1903351	cellular response to dopamine	11/1811	58/23355	0.00451496	0.0400092	0.0321405	11682/13430/14675/14681/14682/14683/14697/15557/66725/18197/19739	11
GO:0001763	BP	GO:0001763	morphogenesis of a branching structure	31/1811	244/23355	0.00453079	0.0400856	0.0322019	11600/14595/12505/12614/94109/18163/13383/13982/14048/14183/14254/14531/14633/381157/16772/16973/66725/71751/18018/18504/18514/241035/19206/68703/20346/20356/20563/17128/319757/240725/329795	31
GO:1990089	BP	GO:1990089	response to nerve growth factor	8/1811	35/23355	0.0045599	0.0402153	0.0323061	78618/50791/18212/18213/107746/76089/20257/81907	8
GO:1990090	BP	GO:1990090	cellular response to nerve growth factor stimulus	8/1811	35/23355	0.0045599	0.0402153	0.0323061	78618/50791/18212/18213/107746/76089/20257/81907	8
GO:0010675	BP	GO:0010675	regulation of cellular carbohydrate metabolic process	23/1811	166/23355	0.00472913	0.0416417	0.033452	100705/11548/12491/18605/17425/108682/208727/15378/15483/16002/30949/16847/16867/17978/18216/233571/18639/19013/19017/18754/19091/19883/20411	23
GO:0032886	BP	GO:0032886	regulation of microtubule-based process	32/1811	255/23355	0.00478762	0.0420902	0.0338123	12345/12449/73420/214444/100048534/76707/13367/330938/13411/13518/13548/13640/78798/14677/56637/17756/17760/17762/232944/260315/83679/208177/241035/105787/108079/74392/20257/320165/57752/21336/329795/73668	32
GO:0003298	BP	GO:0003298	physiological muscle hypertrophy	9/1811	43/23355	0.00502067	0.0439309	0.0352909	11549/11548/238161/12818/108655/56637/19013/19091/106628	9
GO:0003301	BP	GO:0003301	physiological cardiac muscle hypertrophy	9/1811	43/23355	0.00502067	0.0439309	0.0352909	11549/11548/238161/12818/108655/56637/19013/19091/106628	9
GO:0061049	BP	GO:0061049	cell growth involved in cardiac muscle cell development	9/1811	43/23355	0.00502067	0.0439309	0.0352909	11549/11548/238161/12818/108655/56637/19013/19091/106628	9
GO:0048259	BP	GO:0048259	regulation of receptor-mediated endocytosis	18/1811	120/23355	0.00512048	0.044422	0.0356855	269774/11600/12306/11813/13132/13430/269994/232227/50791/93742/234779/18750/217835/73094/64009/104015/72238/69727	18
GO:0007588	BP	GO:0007588	excretion	11/1811	59/23355	0.00516918	0.044422	0.0356855	11549/16790/12288/53419/13132/14683/16531/54631/319239/20495/21336	11
GO:0046622	BP	GO:0046622	positive regulation of organ growth	11/1811	59/23355	0.00516918	0.044422	0.0356855	100705/238161/13869/14183/16002/17967/19664/319757/21388/106628/22762	11
GO:0022027	BP	GO:0022027	interkinetic nuclear migration	4/1811	10/23355	0.00517259	0.044422	0.0356855	67299/320191/320165/57752	4
GO:0032836	BP	GO:0032836	glomerular basement membrane development	4/1811	10/23355	0.00517259	0.044422	0.0356855	12829/71602/18073/240725	4
GO:0045762	BP	GO:0045762	positive regulation of adenylate cyclase activity	4/1811	10/23355	0.00517259	0.044422	0.0356855	12288/12289/20866/21858	4
GO:0051775	BP	GO:0051775	response to redox state	4/1811	10/23355	0.00517259	0.044422	0.0356855	12753/18143/20191/26570	4
GO:0097105	BP	GO:0097105	presynaptic membrane assembly	4/1811	10/23355	0.00517259	0.044422	0.0356855	331461/192167/18189/19266	4
GO:0098953	BP	GO:0098953	receptor diffusion trapping	4/1811	10/23355	0.00517259	0.044422	0.0356855	12300/54377/268566/380702	4
GO:0098970	BP	GO:0098970	postsynaptic neurotransmitter receptor diffusion trapping	4/1811	10/23355	0.00517259	0.044422	0.0356855	12300/54377/268566/380702	4
GO:0099628	BP	GO:0099628	neurotransmitter receptor diffusion trapping	4/1811	10/23355	0.00517259	0.044422	0.0356855	12300/54377/268566/380702	4
GO:1900454	BP	GO:1900454	positive regulation of long-term synaptic depression	4/1811	10/23355	0.00517259	0.044422	0.0356855	14804/17762/243725/29819	4
GO:0034332	BP	GO:0034332	adherens junction organization	10/1811	51/23355	0.00519451	0.0445415	0.0357815	12552/215654/320865/227485/104010/12563/12565/83964/71323/74392	10
GO:0001976	BP	GO:0001976	nervous system process involved in regulation of systemic arterial blood pressure	6/1811	22/23355	0.00544507	0.046404	0.0372777	11549/11548/11418/78286/20112/21336	6
GO:0015012	BP	GO:0015012	heparan sulfate proteoglycan biosynthetic process	6/1811	22/23355	0.00544507	0.046404	0.0372777	319415/50787/15450/83398/235534/233781	6
GO:0060088	BP	GO:0060088	auditory receptor cell stereocilium organization	6/1811	22/23355	0.00544507	0.046404	0.0372777	11941/22295/667663/329421/11994/102502	6
GO:1903514	BP	GO:1903514	release of sequestered calcium ion into cytosol by endoplasmic reticulum	6/1811	22/23355	0.00544507	0.046404	0.0372777	109676/13405/238871/20190/20191/20541	6
GO:0090075	BP	GO:0090075	relaxation of muscle	8/1811	36/23355	0.00547159	0.0465587	0.0374019	20927/238161/16531/18578/238871/242202/19091/20541	8
GO:0048168	BP	GO:0048168	regulation of neuronal synaptic plasticity	12/1811	68/23355	0.00566646	0.0480161	0.0385727	13844/14805/14811/14812/108071/56637/545156/140492/19417/116837/380702/94229	12
GO:0150116	BP	GO:0150116	regulation of cell-substrate junction organization	12/1811	68/23355	0.00566646	0.0480161	0.0385727	11856/192197/76707/50768/13640/14260/29875/232227/77569/16971/244895/208177	12
GO:0035601	BP	GO:0035601	protein deacylation	17/1811	112/23355	0.00567952	0.0480161	0.0385727	76192/80748/12053/107392/13548/14272/320365/208727/79221/81703/14245/66725/17762/116871/20602/105787/108079	17
GO:0098732	BP	GO:0098732	macromolecule deacylation	17/1811	112/23355	0.00567952	0.0480161	0.0385727	76192/80748/12053/107392/13548/14272/320365/208727/79221/81703/14245/66725/17762/116871/20602/105787/108079	17
GO:0003148	BP	GO:0003148	outflow tract septum morphogenesis	7/1811	29/23355	0.00569463	0.0480161	0.0385727	14183/14725/218772/19876/268902/17128/22762	7
GO:0045822	BP	GO:0045822	negative regulation of heart contraction	7/1811	29/23355	0.00569463	0.0480161	0.0385727	11549/18125/238871/242202/18750/19091/80297	7
GO:0014066	BP	GO:0014066	regulation of phosphatidylinositol 3-kinase signaling	16/1811	103/23355	0.00571703	0.048132	0.0386658	11600/12359/69601/13869/14254/14360/16001/268857/211323/18212/18213/380698/228852/19699/26563/26564	16
GO:0007189	BP	GO:0007189	adenylate cyclase-activating G protein-coupled receptor signaling pathway	20/1811	140/23355	0.00574937	0.0483312	0.0388259	210044/104111/11513/11515/210933/243277/13733/319387/11549/11548/381290/14652/14682/14683/14773/16867/18125/18578/76089/22095	20
GO:0032271	BP	GO:0032271	regulation of protein polymerization	29/1811	228/23355	0.0058051	0.0484919	0.0389549	242894/73910/66898/12345/214444/12386/13383/13548/14026/14158/225288/14260/544963/57748/17756/17762/260315/54631/83679/18613/243725/277360/18754/20563/66616/20257/23963/21916/245880	29
GO:0007623	BP	GO:0007623	circadian rhythm	28/1811	218/23355	0.00580938	0.0484919	0.0389549	382543/224671/12753/382056/99586/13548/50758/50754/14402/56637/15378/195646/16531/16847/26414/17978/192167/18143/18212/18213/98432/19013/19017/105787/108079/19091/19883/11906	28
GO:0043542	BP	GO:0043542	endothelial cell migration	28/1811	218/23355	0.00580938	0.0484919	0.0389549	23797/75723/11600/381290/12927/192197/320924/12554/69601/23871/50754/79221/16002/380664/23938/55982/18613/18704/18750/19274/74030/19876/70097/20356/20317/20563/64074/243362	28
GO:0045197	BP	GO:0045197	establishment or maintenance of epithelial cell apical/basal polarity	9/1811	44/23355	0.00588628	0.0484919	0.0389549	170788/13383/23859/16772/108030/242274/93742/72823/71461	9
GO:0086002	BP	GO:0086002	cardiac muscle cell action potential involved in contraction	9/1811	44/23355	0.00588628	0.0484919	0.0389549	109676/12288/12289/216033/13383/140492/16535/83814/20191	9
GO:0014733	BP	GO:0014733	regulation of skeletal muscle adaptation	5/1811	16/23355	0.00589919	0.0484919	0.0389549	76469/57080/18018/21676/21955	5
GO:0018119	BP	GO:0018119	peptidyl-cysteine S-nitrosylation	5/1811	16/23355	0.00589919	0.0484919	0.0389549	381290/13405/18125/70729/170719	5
GO:0031000	BP	GO:0031000	response to caffeine	5/1811	16/23355	0.00589919	0.0484919	0.0389549	105787/108079/20190/20191/20541	5
GO:0044872	BP	GO:0044872	lipoprotein localization	5/1811	16/23355	0.00589919	0.0484919	0.0389549	11813/11814/12491/65969/14725	5
GO:0070593	BP	GO:0070593	dendrite self-avoidance	5/1811	16/23355	0.00589919	0.0484919	0.0389549	244682/53870/13508/114873/319504	5
GO:0071379	BP	GO:0071379	cellular response to prostaglandin stimulus	5/1811	16/23355	0.00589919	0.0484919	0.0389549	14683/233571/105787/108079/18754	5
GO:0090128	BP	GO:0090128	regulation of synapse maturation	5/1811	16/23355	0.00589919	0.0484919	0.0389549	69601/244667/100042150/18189/19699	5
GO:0098885	BP	GO:0098885	modification of postsynaptic actin cytoskeleton	5/1811	16/23355	0.00589919	0.0484919	0.0389549	12386/16443/545156/21844/245880	5
GO:0098974	BP	GO:0098974	postsynaptic actin cytoskeleton organization	5/1811	16/23355	0.00589919	0.0484919	0.0389549	54126/223254/333605/243725/217692	5
GO:0099188	BP	GO:0099188	postsynaptic cytoskeleton organization	5/1811	16/23355	0.00589919	0.0484919	0.0389549	54126/223254/333605/243725/217692	5
GO:0035088	BP	GO:0035088	establishment or maintenance of apical/basal cell polarity	10/1811	52/23355	0.00599405	0.0490542	0.0394067	170788/13383/23859/14048/16772/108030/242274/93742/72823/71461	10
GO:0060043	BP	GO:0060043	regulation of cardiac muscle cell proliferation	10/1811	52/23355	0.00599405	0.0490542	0.0394067	13869/14183/108655/16468/16526/17967/19664/21388/22062/22762	10
GO:0061245	BP	GO:0061245	establishment or maintenance of bipolar cell polarity	10/1811	52/23355	0.00599405	0.0490542	0.0394067	170788/13383/23859/14048/16772/108030/242274/93742/72823/71461	10
GO:0035051	BP	GO:0035051	cardiocyte differentiation	24/1811	179/23355	0.00600625	0.0490819	0.0394289	11549/11548/238161/225638/12818/14200/225288/108655/56637/74103/50490/18175/211323/19013/19091/218772/19664/24052/20541/17128/20679/21388/23966/106628	24
GO:1903792	BP	GO:1903792	negative regulation of anion transport	31/1811	249/23355	0.00608973	0.0496911	0.0399183	20927/11600/11813/12021/12491/18605/13982/209630/108073/15378/15932/545156/16535/68421/66725/76273/18125/216440/18575/18576/218461/98496/18750/18751/19091/52055/74370/27414/207227/68889/26950	31
GO:0060411	BP	GO:0060411	cardiac septum morphogenesis	14/1811	86/23355	0.00619583	0.0503425	0.0404416	13411/14183/14725/18018/218772/19664/19876/268902/20563/20564/17128/319757/21388/22762	14
GO:0003007	BP	GO:0003007	heart morphogenesis	34/1811	280/23355	0.00620361	0.0503425	0.0404416	225638/11600/68146/50768/13411/13876/14048/14183/14200/245866/14725/269878/20602/18018/19206/218772/19664/19876/268902/20190/20191/20541/20563/20564/17128/66993/319757/20662/24069/21388/21676/241431/22762/328365	34
GO:0030038	BP	GO:0030038	contractile actin filament bundle assembly	17/1811	113/23355	0.00621479	0.0503425	0.0404416	69710/11856/72754/230837/68178/76707/235431/50768/14026/77569/50490/218194/208177/320472/243725/20411/21336	17
GO:0043149	BP	GO:0043149	stress fiber assembly	17/1811	113/23355	0.00621479	0.0503425	0.0404416	69710/11856/72754/230837/68178/76707/235431/50768/14026/77569/50490/218194/208177/320472/243725/20411/21336	17
GO:1903076	BP	GO:1903076	regulation of protein localization to plasma membrane	17/1811	113/23355	0.00621479	0.0503425	0.0404416	381290/13132/13383/269109/13483/13844/13853/545156/16971/17919/18189/98496/102502/20411/20840/20908/55943	17
GO:0009855	BP	GO:0009855	determination of bilateral symmetry	20/1811	141/23355	0.00622436	0.0503468	0.040445	108909/11764/68146/83675/74453/68897/13411/110350/106633/245866/16348/26407/269878/18552/171395/19664/19726/319757/24069/329795	20
GO:0031623	BP	GO:0031623	receptor internalization	19/1811	132/23355	0.00644399	0.0520476	0.0418113	11600/12300/54377/12491/13132/13430/103967/14799/269994/232227/68421/50791/93742/234779/217835/64009/104015/72238/69727	19
GO:0032232	BP	GO:0032232	negative regulation of actin filament bundle assembly	8/1811	37/23355	0.00651583	0.0524755	0.0421551	69710/11856/68178/76707/235431/50768/208177/243725	8
GO:0086004	BP	GO:0086004	regulation of cardiac muscle cell contraction	8/1811	37/23355	0.00651583	0.0524755	0.0421551	238161/109676/12288/216033/13383/18578/238871/20191	8
GO:0009259	BP	GO:0009259	ribonucleotide metabolic process	41/1811	354/23355	0.00653127	0.0525239	0.042194	100705/14081/117147/271639/210044/104111/11513/11515/633979/11941/12298/55936/64451/99586/101592/226265/18605/330450/17425/667451/208727/15378/66725/74143/23971/23972/18573/238871/242202/18585/98496/19013/19017/105787/108079/108099/19883/54403/20917/76654/56490	41
GO:0010676	BP	GO:0010676	positive regulation of cellular carbohydrate metabolic process	11/1811	61/23355	0.00670091	0.0536555	0.043103	11548/12491/108682/15378/16002/16867/18216/233571/19013/18754/20411	11
GO:0021575	BP	GO:0021575	hindbrain morphogenesis	11/1811	61/23355	0.00670091	0.0536555	0.043103	11941/12286/13131/50768/14633/14804/16917/18189/19883/319757/73668	11
GO:0048260	BP	GO:0048260	positive regulation of receptor-mediated endocytosis	11/1811	61/23355	0.00670091	0.0536555	0.043103	11600/12306/13132/13430/50791/93742/234779/73094/64009/104015/72238	11
GO:0009799	BP	GO:0009799	specification of symmetry	20/1811	142/23355	0.00673097	0.0538188	0.0432342	108909/11764/68146/83675/74453/68897/13411/110350/106633/245866/16348/26407/269878/18552/171395/19664/19726/319757/24069/329795	20
GO:0010594	BP	GO:0010594	regulation of endothelial cell migration	23/1811	171/23355	0.00678583	0.0541796	0.043524	23797/75723/11600/381290/12927/192197/320924/69601/23871/50754/79221/16002/23938/18704/18750/19274/74030/70097/20356/20317/20563/64074/243362	23
GO:0019228	BP	GO:0019228	neuronal action potential	9/1811	45/23355	0.00686246	0.0543963	0.0436982	11735/13483/14167/14799/16531/71960/56508/110880/20273	9
GO:0050918	BP	GO:0050918	positive chemotaxis	9/1811	45/23355	0.00686246	0.0543963	0.0436982	11600/12554/16398/16971/14725/18213/18750/20356/22422	9
GO:0071526	BP	GO:0071526	semaphorin-plexin signaling pathway	9/1811	45/23355	0.00686246	0.0543963	0.0436982	17967/18845/243743/54712/20346/108151/20356/20357/214968	9
GO:1903115	BP	GO:1903115	regulation of actin filament-based movement	9/1811	45/23355	0.00686246	0.0543963	0.0436982	238161/109676/12288/216033/13383/18125/18578/238871/20191	9
GO:1902476	BP	GO:1902476	chloride transmembrane transport	10/1811	53/23355	0.0068862	0.0543963	0.0436982	101772/243634/320091/24115/12638/14402/14407/14657/14658/20495	10
GO:0010996	BP	GO:0010996	response to auditory stimulus	6/1811	23/23355	0.00689118	0.0543963	0.0436982	76192/50769/66797/18189/18190/21336	6
GO:0015812	BP	GO:0015812	gamma-aminobutyric acid transport	6/1811	23/23355	0.00689118	0.0543963	0.0436982	319924/12286/12298/14805/18216/22066	6
GO:1902307	BP	GO:1902307	positive regulation of sodium ion transmembrane transport	6/1811	23/23355	0.00689118	0.0543963	0.0436982	11735/215748/13405/13430/18125/18795	6
GO:0051492	BP	GO:0051492	regulation of stress fiber assembly	15/1811	96/23355	0.00692609	0.0544704	0.0437577	69710/11856/72754/230837/68178/76707/235431/50768/14026/77569/50490/208177/320472/243725/21336	15
GO:0007214	BP	GO:0007214	gamma-aminobutyric acid signaling pathway	7/1811	30/23355	0.00693971	0.0544704	0.0437577	12286/12298/242425/14402/14407/227120/224860	7
GO:0021602	BP	GO:0021602	cranial nerve morphogenesis	7/1811	30/23355	0.00693971	0.0544704	0.0437577	110532/13405/270190/13844/18504/243743/20346	7
GO:0046885	BP	GO:0046885	regulation of hormone biosynthetic process	7/1811	30/23355	0.00693971	0.0544704	0.0437577	12286/13132/16001/16002/16867/218461/19017	7
GO:0003018	BP	GO:0003018	vascular process in circulatory system	28/1811	221/23355	0.00698639	0.0546825	0.0439281	18671/20927/109934/11549/11548/11600/11418/12288/12491/12638/69219/238130/68813/240672/16531/16971/18125/54611/242202/19091/19274/229877/20502/20518/20541/20563/21336/21391	28
GO:0051495	BP	GO:0051495	positive regulation of cytoskeleton organization	28/1811	221/23355	0.00698639	0.0546825	0.0439281	242894/72754/66898/192197/214444/12386/13383/14026/14158/14260/544963/57748/77569/17762/260315/50490/54631/18213/83679/320472/18754/20356/66616/20257/118449/21336/23963/245880	28
GO:0051480	BP	GO:0051480	regulation of cytosolic calcium ion concentration	43/1811	377/23355	0.00710284	0.0555159	0.0445975	11549/11548/238161/109676/11941/381290/12286/12288/12308/12491/22295/13367/13405/13982/270028/14360/14652/14811/14812/14816/16438/16439/16510/16867/16971/17096/18125/319239/18216/233571/238871/234779/18754/19091/20190/20191/20192/20541/21336/22045/22066/26946/17364	43
GO:0060541	BP	GO:0060541	respiratory system development	32/1811	262/23355	0.00712846	0.055638	0.0446956	216725/101772/20238/320924/12614/12638/13360/68897/13607/14048/50754/14183/72007/108655/74123/14633/15483/244653/16420/16772/20602/19165/71461/19664/26570/74355/320277/21388/21834/319939/22422/22762	32
GO:0010921	BP	GO:0010921	regulation of phosphatase activity	18/1811	124/23355	0.00721564	0.0562395	0.0451788	215821/76469/23859/13853/223254/67769/433899/16398/14245/50791/107895/338367/170826/72930/243819/71474/241919/243274	18
GO:1903532	BP	GO:1903532	positive regulation of secretion by cell	40/1811	346/23355	0.00736996	0.057362	0.0460806	69865/101772/225372/54126/12289/27062/320405/12638/76707/13132/12934/320051/209630/14389/14652/14812/16443/16847/16971/102635496/26399/17919/245049/54003/192167/18216/18750/18754/80718/19349/235442/56508/12394/17128/78808/207227/60510/21336/21943/26950	40
GO:0046626	BP	GO:0046626	regulation of insulin receptor signaling pathway	13/1811	79/23355	0.00746546	0.0580242	0.0466125	66898/18605/16002/68421/74143/237542/98496/105787/18750/18751/18762/20411/20660	13
GO:0070507	BP	GO:0070507	regulation of microtubule cytoskeleton organization	21/1811	153/23355	0.00749576	0.0581784	0.0467364	12345/73420/214444/76707/330938/13518/13548/13640/78798/14677/56637/17756/17760/17762/260315/83679/208177/105787/108079/74392/20257	21
GO:0009791	BP	GO:0009791	post-embryonic development	19/1811	134/23355	0.00756499	0.0586339	0.0471024	22295/170788/13360/13508/14183/14254/14682/14683/433899/16348/16438/14013/71602/30953/94229/20541/20679/230676/22062	19
GO:0051058	BP	GO:0051058	negative regulation of small GTPase mediated signal transduction	11/1811	62/23355	0.00758919	0.0586757	0.0471359	11549/11548/231532/12053/68178/69601/50768/13844/107746/20563/21858	11
GO:0009812	BP	GO:0009812	flavonoid metabolic process	4/1811	11/23355	0.00763364	0.0586757	0.0471359	394430/394435/394432/394434	4
GO:0019227	BP	GO:0019227	neuronal action potential propagation	4/1811	11/23355	0.00763364	0.0586757	0.0471359	12298/319504/18212/18213	4
GO:0051657	BP	GO:0051657	maintenance of organelle location	4/1811	11/23355	0.00763364	0.0586757	0.0471359	100986/71435/70573/78610	4
GO:0071415	BP	GO:0071415	cellular response to purine-containing compound	4/1811	11/23355	0.00763364	0.0586757	0.0471359	233571/20190/20191/20541	4
GO:0098870	BP	GO:0098870	action potential propagation	4/1811	11/23355	0.00763364	0.0586757	0.0471359	12298/319504/18212/18213	4
GO:0030178	BP	GO:0030178	negative regulation of Wnt signaling pathway	22/1811	163/23355	0.00766748	0.0588115	0.047245	225638/83675/12558/13132/69601/56637/16348/16971/18099/18230/235542/19277/19273/107746/207181/26564/380702/56274/68889/24117/22419/80707	22
GO:0048265	BP	GO:0048265	response to pain	8/1811	38/23355	0.00770414	0.0588115	0.047245	12286/12290/14805/14812/545156/19699/12394/21336	8
GO:0070884	BP	GO:0070884	regulation of calcineurin-NFAT signaling cascade	8/1811	38/23355	0.00770414	0.0588115	0.047245	238161/381290/100072/76469/14200/56637/211323/20495	8
GO:1901385	BP	GO:1901385	regulation of voltage-gated calcium channel activity	8/1811	38/23355	0.00770414	0.0588115	0.047245	12286/12298/13405/14169/14697/70729/18578/20840	8
GO:2000758	BP	GO:2000758	positive regulation of peptidyl-lysine acetylation	8/1811	38/23355	0.00770414	0.0588115	0.047245	319974/64451/239667/18125/55982/105787/108079/17128	8
GO:0006491	BP	GO:0006491	N-glycan processing	5/1811	17/23355	0.0078308	0.0591295	0.0475004	53618/76051/17155/20449/241230	5
GO:0007614	BP	GO:0007614	short-term memory	5/1811	17/23355	0.0078308	0.0591295	0.0475004	13048/108073/242202/53901/20317	5
GO:0032957	BP	GO:0032957	inositol trisphosphate metabolic process	5/1811	17/23355	0.0078308	0.0591295	0.0475004	217837/16867/233571/18795/234779	5
GO:0036035	BP	GO:0036035	osteoclast development	5/1811	17/23355	0.0078308	0.0591295	0.0475004	12306/14118/50754/233328/21943	5
GO:0051895	BP	GO:0051895	negative regulation of focal adhesion assembly	5/1811	17/23355	0.0078308	0.0591295	0.0475004	11856/192197/50768/16971/208177	5
GO:0150118	BP	GO:0150118	negative regulation of cell-substrate junction organization	5/1811	17/23355	0.0078308	0.0591295	0.0475004	11856/192197/50768/16971/208177	5
GO:2000479	BP	GO:2000479	regulation of cAMP-dependent protein kinase activity	5/1811	17/23355	0.0078308	0.0591295	0.0475004	238161/381290/19085/19088/76089	5
GO:2000651	BP	GO:2000651	positive regulation of sodium ion transmembrane transporter activity	5/1811	17/23355	0.0078308	0.0591295	0.0475004	11735/215748/13405/13430/18795	5
GO:0043393	BP	GO:0043393	regulation of protein binding	28/1811	223/23355	0.00787575	0.0591631	0.0475275	11600/12306/11804/54126/72832/13132/244667/56637/208727/15925/16971/66725/17756/107975/56273/227120/224860/19013/19165/76089/66993/20660/233744/56274/68188/21844/21943/278507	28
GO:0001662	BP	GO:0001662	behavioral fear response	10/1811	54/23355	0.00787779	0.0591631	0.0475275	382543/241118/12290/14708/14812/108073/545156/18143/218461/69727	10
GO:0009395	BP	GO:0009395	phospholipid catabolic process	10/1811	54/23355	0.00787779	0.0591631	0.0475275	76192/66082/11813/15450/665270/18795/234779/18805/18947/241274	10
GO:0031646	BP	GO:0031646	positive regulation of nervous system process	10/1811	54/23355	0.00787779	0.0591631	0.0475275	16398/211323/18216/93742/56508/116837/116838/23966/21960/245880	10
GO:1902905	BP	GO:1902905	positive regulation of supramolecular fiber organization	26/1811	203/23355	0.00793169	0.0593645	0.0476892	242894/72754/66898/214444/12386/13383/14026/14158/14260/544963/57748/77569/17762/260315/50490/54631/83679/320472/18754/20356/66616/20257/118449/21336/23963/245880	26
GO:0010518	BP	GO:0010518	positive regulation of phospholipase activity	9/1811	46/23355	0.00795793	0.0593645	0.0476892	11549/11813/11856/50768/13982/14183/14254/14682/18762	9
GO:0014904	BP	GO:0014904	myotube cell development	9/1811	46/23355	0.00795793	0.0593645	0.0476892	13405/227325/208727/79221/26556/18019/20190/319757/69726	9
GO:0051898	BP	GO:0051898	negative regulation of protein kinase B signaling	9/1811	46/23355	0.00795793	0.0593645	0.0476892	242248/13383/16001/68421/50791/98432/241035/19013/107746	9
GO:0060421	BP	GO:0060421	positive regulation of heart growth	9/1811	46/23355	0.00795793	0.0593645	0.0476892	100705/238161/13869/14183/17967/19664/21388/106628/22762	9
GO:0010611	BP	GO:0010611	regulation of cardiac muscle hypertrophy	12/1811	71/23355	0.00804345	0.0599221	0.0481372	11549/238161/381290/108655/56637/16468/242202/18585/19013/18750/17128/106628	12
GO:0014065	BP	GO:0014065	phosphatidylinositol 3-kinase signaling	19/1811	135/23355	0.00818194	0.0607911	0.0488352	11600/12359/69601/13869/14254/14360/16001/244281/268857/211323/18212/18213/380698/18704/18705/228852/19699/26563/26564	19
GO:0034766	BP	GO:0034766	negative regulation of ion transmembrane transport	19/1811	135/23355	0.00818194	0.0607911	0.0488352	11735/18605/13844/13982/14167/14697/94253/16497/16535/68421/83814/18125/18216/108737/98496/18704/18750/18751/18754	19
GO:0031532	BP	GO:0031532	actin cytoskeleton reorganization	16/1811	107/23355	0.00825477	0.0612504	0.0492042	69538/319974/66898/12927/192197/14158/544963/14245/18003/18213/218194/71461/217692/330267/210417/665113	16
GO:0018200	BP	GO:0018200	peptidyl-glutamic acid modification	7/1811	31/23355	0.0083757	0.0619824	0.0497923	244071/78933/102747/74410/320244/70892/239591	7
GO:1903523	BP	GO:1903523	negative regulation of blood circulation	7/1811	31/23355	0.0083757	0.0619824	0.0497923	11549/18125/238871/242202/18750/19091/80297	7
GO:0098984	CC	GO:0098984	neuron to neuron synapse	113/1836	433/23177	9.86234e-31	6.27245e-28	4.32905e-28	11308/226251/109934/432442/100986/109676/77531/99371/330914/11941/12217/12288/12300/54377/67252/12345/12380/12558/12565/382056/12386/18163/13131/269060/13176/320127/244667/13383/23859/224997/13430/103967/13518/13631/13823/13869/111173/238988/20336/333605/14360/268566/14799/14802/14803/14804/14805/110637/14811/14812/242443/74053/14816/108071/108073/269994/56637/26556/331461/269180/232227/241226/16…	113
GO:0032279	CC	GO:0032279	asymmetric synapse	104/1836	405/23177	9.7211e-28	3.09131e-25	2.13353e-25	11308/226251/109934/100986/109676/77531/99371/330914/11941/12217/12288/12300/54377/67252/12345/12380/12558/382056/12386/18163/13131/269060/13176/320127/244667/13383/23859/224997/13430/103967/13518/13631/13823/13869/111173/238988/20336/333605/14360/268566/14799/14802/14803/14804/14805/14811/14812/242443/74053/14816/108071/108073/269994/56637/26556/331461/269180/232227/241226/16438/545156/16646/705…	104
GO:0014069	CC	GO:0014069	postsynaptic density	102/1836	400/23177	5.80729e-27	1.23115e-24	8.49699e-25	11308/226251/109934/100986/109676/77531/330914/11941/12217/12288/12300/54377/67252/12345/12380/12558/382056/12386/18163/13131/269060/13176/320127/244667/13383/23859/224997/13430/103967/13518/13631/13823/13869/111173/238988/20336/333605/14360/268566/14799/14802/14803/14804/14805/14811/14812/242443/74053/14816/108071/269994/56637/26556/331461/269180/232227/241226/16438/545156/16646/70530/241568/242…	102
GO:0097060	CC	GO:0097060	synaptic membrane	112/1836	471/23177	1.0942e-26	1.73977e-24	1.20074e-24	66082/23792/11549/100986/11733/109676/11735/319924/11941/381290/12217/12286/12288/12289/12290/12300/54377/320405/12308/12558/12565/244682/53870/66797/12386/269060/13176/217480/320127/13383/23859/224997/13405/13430/103967/13844/13869/238988/223254/242425/14402/14407/14657/14658/268566/14799/14802/14803/14804/14805/14807/110637/14811/14812/242443/74053/14816/108071/108073/14823/269994/230868/331461…	112
GO:0099572	CC	GO:0099572	postsynaptic specialization	106/1836	439/23177	6.92063e-26	8.80304e-24	6.07558e-24	11308/226251/109934/100986/109676/77531/330914/11941/12217/12288/12300/54377/67252/12345/12380/12558/382056/12386/18163/13131/269060/13176/320127/244667/13383/23859/224997/244310/13430/103967/13518/13631/13823/13869/111173/238988/20336/333605/14360/14402/14657/268566/14799/14802/14803/14804/14805/14811/14812/242443/74053/14816/108071/269994/56637/26556/331461/269180/232227/241226/16438/545156/166…	106
GO:0045211	CC	GO:0045211	postsynaptic membrane	82/1836	331/23177	4.83095e-21	5.1208e-19	3.53422e-19	66082/11549/100986/11733/109676/11735/11941/12288/12290/12300/54377/320405/12558/12565/12386/269060/13176/217480/320127/13383/23859/224997/13405/13430/103967/13844/13869/223254/242425/14402/14407/14657/14658/268566/14799/14802/14803/14804/14805/14807/110637/14811/14812/242443/74053/14816/108071/108073/269994/230868/331461/16510/16531/383348/243043/108030/70530/241568/242274/243499/50791/26422/179…	82
GO:0099240	CC	GO:0099240	intrinsic component of synaptic membrane	62/1836	245/23177	1.03221e-16	9.37838e-15	6.47266e-15	66082/23792/11549/11941/381290/12286/12288/12289/12290/12300/54377/12558/12565/244682/53870/269060/13176/23859/13844/13869/242425/14402/14407/14657/268566/14799/14802/14803/14804/14805/110637/14811/14812/242443/14816/108071/108073/14823/269994/331461/16510/16519/16522/16531/70530/241568/242274/243499/17967/192167/319504/18189/80883/18213/19165/19266/19277/20273/380702/104245/20541/66673	62
GO:0034702	CC	GO:0034702	ion channel complex	69/1836	297/23177	2.38379e-16	1.88923e-14	1.30389e-14	20927/76192/66082/238161/101772/243634/24115/320508/12286/12288/12289/12290/12294/12298/12300/54377/76856/271036/12638/66797/13383/23859/269109/13483/14402/14407/14657/14658/14799/14802/14804/14805/14807/110637/14811/14812/242443/15165/16497/240444/16510/70357/80334/16519/16526/16531/16535/226922/242274/433926/231549/243499/216001/192167/70729/18578/238871/171395/20190/20191/20192/110880/20273/21…	69
GO:1990351	CC	GO:1990351	transporter complex	73/1836	326/23177	2.67344e-16	1.88923e-14	1.30389e-14	20927/76192/66082/238161/101772/243634/319767/11980/24115/320508/12286/12288/12289/12290/12294/12298/12300/54377/76856/271036/12638/30952/66797/13383/23859/269109/13483/14402/14407/14657/14658/14799/14802/14804/14805/14807/110637/14811/14812/242443/15165/16497/240444/16510/70357/80334/16519/16526/16531/16535/226922/242274/433926/231549/243499/216001/192167/70729/18578/238871/56273/171395/20190/20…	73
GO:1902495	CC	GO:1902495	transmembrane transporter complex	70/1836	313/23177	1.179e-15	7.49843e-14	5.17518e-14	20927/76192/66082/238161/101772/243634/24115/320508/12286/12288/12289/12290/12294/12298/12300/54377/76856/271036/12638/30952/66797/13383/23859/269109/13483/14402/14407/14657/14658/14799/14802/14804/14805/14807/110637/14811/14812/242443/15165/16497/240444/16510/70357/80334/16519/16526/16531/16535/226922/242274/433926/231549/243499/216001/192167/70729/18578/238871/171395/20190/20191/20192/110880/20…	70
GO:0099699	CC	GO:0099699	integral component of synaptic membrane	57/1836	226/23177	2.08479e-15	1.20539e-13	8.31923e-14	66082/23792/11549/11941/381290/12286/12288/12289/12290/12300/54377/12558/12565/269060/13176/13844/13869/242425/14402/14407/14657/14799/14802/14803/14804/14805/110637/14811/14812/242443/14816/108071/108073/14823/269994/331461/16510/16519/16522/16531/70530/241568/242274/243499/17967/192167/319504/18189/18213/19165/19266/19277/20273/380702/104245/20541/66673	57
GO:0042734	CC	GO:0042734	presynaptic membrane	51/1836	198/23177	2.51181e-14	1.33126e-12	9.18793e-13	23792/11549/319924/11941/381290/12286/12288/12289/12290/320405/12558/12565/244682/53870/12386/320127/13383/13844/13869/238988/242425/14799/14805/14807/110637/14811/14812/14816/108073/14823/230868/16443/16510/16519/16522/16531/383348/17967/18189/18190/18191/80883/19165/19266/116837/116838/20273/104245/20908/78808/208898	51
GO:0034703	CC	GO:0034703	cation channel complex	54/1836	223/23177	7.00286e-14	3.42602e-12	2.36453e-12	20927/76192/66082/238161/320508/12286/12288/12289/12290/12294/12298/12300/54377/76856/271036/66797/23859/269109/13483/14799/14802/14805/14807/110637/14811/14812/242443/15165/16497/240444/16510/70357/80334/16519/16526/16531/16535/226922/243499/216001/192167/70729/18578/238871/171395/20190/20191/20192/110880/20273/380702/22066/26946/329178	54
GO:0150034	CC	GO:0150034	distal axon	76/1836	385/23177	8.27732e-14	3.76027e-12	2.59522e-12	269774/271639/54126/319974/12308/12808/72832/13176/320127/244667/330938/13430/12934/13508/238988/13982/20336/14402/14802/14805/14807/110637/14811/14812/108073/56637/15165/29875/16398/16443/16526/16531/16572/231876/16971/14725/66725/17756/17762/71960/17967/18125/18189/18212/18216/72333/93742/211712/243725/277360/18750/18751/19165/19206/19275/19276/56508/19417/26563/210274/239606/94229/20541/319757…	76
GO:0015629	CC	GO:0015629	actin cytoskeleton	90/1836	500/23177	1.26756e-13	5.37445e-12	3.70928e-12	226251/60595/242894/12306/225372/71435/330914/11856/13196/319974/66898/12927/12308/12345/217866/12558/70737/68178/12808/53419/235431/13007/12386/69635/68511/67665/230073/380921/50768/13518/13548/14158/225288/70598/14254/14260/23880/14360/14701/208727/29875/16443/83964/77113/77569/210126/242274/17756/110265/71960/107589/244281/338367/71602/667663/329421/17919/208943/17922/245049/50490/18261/72333/…	90
GO:0098839	CC	GO:0098839	postsynaptic density membrane	32/1836	97/23177	1.21497e-12	4.8295e-11	3.33317e-11	100986/11941/12300/54377/269060/13176/320127/13383/23859/13869/14799/14802/14803/14804/14811/14812/242443/14816/108071/269994/331461/70530/241568/242274/243499/319504/19277/19739/20273/380702/66673/21844	32
GO:0060076	CC	GO:0060076	excitatory synapse	28/1836	78/23177	2.9588e-12	1.10694e-10	7.63975e-11	11941/12217/320405/12308/53870/66797/12386/320127/14183/14799/14804/14811/14812/26556/16510/16519/16522/192167/235106/18212/72333/18578/18798/56508/20273/380702/104015/208898	28
GO:0043235	CC	GO:0043235	receptor complex	76/1836	414/23177	3.81422e-12	1.34769e-10	9.30134e-11	76192/66082/110789/11658/11682/11864/12300/54377/12503/12491/12505/12804/65969/13383/23859/13840/270190/13844/13869/14183/14254/242425/14402/14407/14585/404194/14799/14802/14804/14805/14807/110637/14811/14812/242443/14816/108073/16001/218624/319480/16398/241226/104099/381924/16420/223272/16439/383348/243043/16847/16867/231876/16971/94217/14725/16973/242274/243499/17096/192167/18212/18213/18845/24…	76
GO:0019897	CC	GO:0019897	extrinsic component of plasma membrane	46/1836	190/23177	4.94628e-12	1.6557e-10	1.14271e-10	100986/12306/12552/215654/12554/320865/227485/12558/104010/22295/381409/12561/12563/12565/12386/320127/13527/223254/14158/14360/14675/14677/14681/14682/14683/14696/14697/14701/14702/14708/268566/29875/16497/70357/17096/50791/19041/20190/20191/66616/20840/78808/83672/23964/21844/22612	46
GO:0031252	CC	GO:0031252	cell leading edge	73/1836	396/23177	8.27234e-12	2.63061e-10	1.81556e-10	269774/11308/226251/78618/75723/11733/69538/12306/73910/54126/230837/12927/192197/74741/12289/12345/12505/12558/12571/66797/12808/12386/216033/269060/230073/13367/50768/13430/13823/14026/20336/14158/232288/14407/14683/14799/15165/29875/544963/241226/16443/57748/16510/16826/17756/17762/107589/338367/211323/72333/18613/208177/74055/18805/213556/243725/18762/234353/19274/19876/268902/59009/380702/71…	73
GO:0044309	CC	GO:0044309	neuron spine	48/1836	210/23177	1.56764e-11	4.74771e-10	3.27672e-10	319924/11784/99371/13196/11418/12345/66797/269060/320127/64451/244310/13430/103967/13631/333605/14799/14802/14804/14811/14812/14816/108071/56637/26556/241226/16443/140492/242274/19070/17919/17978/192167/18212/18216/18578/327814/243725/19088/19277/56508/210274/380702/217692/20541/14270/64009/23964/21844	48
GO:0043197	CC	GO:0043197	dendritic spine	47/1836	205/23177	2.27384e-11	6.57345e-10	4.53679e-10	319924/11784/99371/13196/11418/12345/269060/320127/64451/244310/13430/103967/13631/333605/14799/14802/14804/14811/14812/14816/108071/56637/26556/241226/16443/140492/242274/19070/17919/17978/192167/18212/18216/18578/327814/243725/19088/19277/56508/210274/380702/217692/20541/14270/64009/23964/21844	47
GO:0030018	CC	GO:0030018	Z disc	35/1836	127/23177	3.62274e-11	1.00177e-09	6.91388e-10	60595/11549/100041194/11733/109676/11735/381290/12288/12289/12345/13007/13405/13518/14200/14812/208727/26556/57339/140492/74103/18125/70729/18175/380698/72333/18578/329251/19165/20190/20191/20192/20273/20541/118449/241431	35
GO:0005938	CC	GO:0005938	cell cortex	60/1836	306/23177	4.56219e-11	1.20898e-09	8.344e-10	60595/11733/12306/330914/12217/74741/12308/12345/66205/12558/76707/12808/12386/68511/50768/111173/238988/20336/14183/666060/320365/14677/67839/108073/71683/545370/665700/29875/16439/17279/71602/17919/245049/18261/237542/93742/72823/83679/208177/213556/102502/243725/18751/18762/19165/69288/116837/116838/20190/110380/27428/208431/66616/80297/20866/21916/22066/208898/22288/56544	60
GO:0099055	CC	GO:0099055	integral component of postsynaptic membrane	41/1836	169/23177	6.55834e-11	1.63328e-09	1.12724e-09	66082/11549/11941/12288/12290/12300/54377/12558/12565/269060/13176/13844/13869/242425/14402/14657/14799/14802/14803/14804/110637/14811/14812/242443/14816/108071/269994/331461/70530/241568/242274/243499/17967/192167/319504/18213/19277/20273/380702/20541/66673	41
GO:0099634	CC	GO:0099634	postsynaptic specialization membrane	36/1836	136/23177	6.7456e-11	1.63328e-09	1.12724e-09	100986/11941/12300/54377/12558/269060/13176/320127/13383/23859/13869/14402/14657/14799/14802/14803/14804/14811/14812/242443/14816/108071/269994/331461/70530/241568/242274/243499/192167/319504/19277/19739/20273/380702/66673/21844	36
GO:0098982	CC	GO:0098982	GABA-ergic synapse	31/1836	105/23177	6.93376e-11	1.63328e-09	1.12724e-09	66082/11549/54126/11941/12217/12290/12554/244682/13640/13869/111173/238988/242425/14402/14407/14658/268566/108073/14823/16438/50791/320772/211323/100042150/18189/18191/18795/19277/116837/116838/229706	31
GO:0098936	CC	GO:0098936	intrinsic component of postsynaptic membrane	42/1836	178/23177	9.92041e-11	2.25335e-09	1.55519e-09	66082/11549/11941/12288/12290/12300/54377/12558/12565/269060/13176/23859/13844/13869/242425/14402/14657/14799/14802/14803/14804/110637/14811/14812/242443/14816/108071/269994/331461/70530/241568/242274/243499/17967/192167/319504/18213/19277/20273/380702/20541/66673	42
GO:0042383	CC	GO:0042383	sarcolemma	40/1836	166/23177	1.39356e-10	3.05621e-09	2.1093e-09	20927/11549/11548/238161/432442/11733/109676/11735/12306/381290/12288/12289/54377/12491/12558/13383/13405/13518/13527/13982/14683/16001/16519/140492/16535/18125/70729/380698/18585/18754/19091/20190/20191/20192/24052/244431/20541/16651/20840/22288	40
GO:0030427	CC	GO:0030427	site of polarized growth	47/1836	216/23177	1.53146e-10	3.2467e-09	2.24077e-09	271639/54126/319974/12808/72832/13176/244667/13430/12934/13508/238988/20336/320365/56637/29875/16572/231876/16971/14725/66725/17756/17762/71960/17967/18189/18212/72333/93742/211712/243725/277360/19165/19206/56508/19417/210274/239606/319757/20866/20257/20908/21844/21858/67095/17364/22253/22288	47
GO:0098858	CC	GO:0098858	actin-based cell projection	48/1836	224/23177	1.71222e-10	3.51281e-09	2.42443e-09	11308/110789/11600/69538/11973/12308/66205/12505/22295/12638/170788/13383/13405/238130/270190/20336/433899/544963/83964/15450/240411/242274/66725/17756/666339/338367/71602/667663/329421/17922/192167/18261/72333/11994/59020/192190/102502/27205/243725/50934/219140/13409/252974/22253/22283/22288/80707/67263	48
GO:0045177	CC	GO:0045177	apical part of cell	77/1836	460/23177	2.76096e-10	5.48741e-09	3.78724e-09	18671/271639/432442/75723/101772/11746/11941/11973/12289/12491/12505/12558/22295/214552/12638/12661/12804/170788/65969/13131/13132/213452/110350/13607/26556/15483/241226/217837/16526/16531/16971/14725/666339/17919/17922/245049/50490/246190/233571/23850/93742/72823/68070/59020/241035/18805/27205/105787/108079/18750/18762/19165/19206/19277/80718/76089/56508/192786/210274/110380/27428/208431/74206/2…	77
GO:0099061	CC	GO:0099061	integral component of postsynaptic density membrane	24/1836	71/23177	4.41673e-10	8.51224e-09	5.87488e-09	11941/12300/54377/13176/13869/14799/14802/14803/14804/14811/14812/242443/14816/269994/331461/70530/241568/242274/243499/319504/19277/20273/380702/66673	24
GO:0099146	CC	GO:0099146	intrinsic component of postsynaptic density membrane	25/1836	77/23177	5.10278e-10	9.48059e-09	6.54321e-09	11941/12300/54377/13176/23859/13869/14799/14802/14803/14804/14811/14812/242443/14816/269994/331461/70530/241568/242274/243499/319504/19277/20273/380702/66673	25
GO:0098685	CC	GO:0098685	Schaffer collateral - CA1 synapse	31/1836	113/23177	5.32544e-10	9.48059e-09	6.54321e-09	109934/77531/319924/11784/12217/12300/12345/12552/13176/217480/320127/14360/14816/108071/269994/56637/232227/16438/70530/241568/17919/17967/18189/80883/19085/18762/19266/20908/78808/104015/21960	31
GO:0030426	CC	GO:0030426	growth cone	45/1836	209/23177	5.36637e-10	9.48059e-09	6.54321e-09	271639/54126/319974/12808/72832/13176/244667/13430/12934/13508/238988/20336/56637/29875/16572/231876/16971/14725/66725/17756/17762/71960/17967/18189/18212/72333/93742/211712/243725/277360/19165/19206/56508/19417/210274/239606/319757/20866/20257/20908/21844/21858/67095/22253/22288	45
GO:0031674	CC	GO:0031674	I band	35/1836	140/23177	6.72193e-10	1.15544e-08	7.97452e-09	60595/11549/100041194/11733/109676/11735/381290/12288/12289/12345/13007/13405/13518/14200/14812/208727/26556/57339/140492/74103/18125/70729/18175/380698/72333/18578/329251/19165/20190/20191/20192/20273/20541/118449/241431	35
GO:0098889	CC	GO:0098889	intrinsic component of presynaptic membrane	33/1836	128/23177	8.73292e-10	1.46162e-08	1.00876e-08	23792/11549/11941/381290/12286/12288/12289/12290/12558/12565/244682/53870/13844/13869/242425/14799/14805/110637/14811/14812/108073/14823/16510/16519/16522/16531/17967/18189/80883/19165/19266/20273/104245	33
GO:0030017	CC	GO:0030017	sarcomere	42/1836	191/23177	1.01775e-09	1.65972e-08	1.14549e-08	60595/11549/100041194/11733/109676/11735/381290/12288/12289/12345/13007/13405/13518/14200/225288/14812/208727/26556/57339/140492/242702/74103/18125/70729/18175/380698/72333/18578/329251/19165/20190/20191/20192/20273/319719/20541/66106/64009/118449/21916/21955/241431	42
GO:0030863	CC	GO:0030863	cortical cytoskeleton	32/1836	123/23177	1.22282e-09	1.94429e-08	1.34189e-08	60595/11733/12217/12308/12345/12558/76707/12808/68511/50768/111173/238988/71683/29875/71602/245049/18261/83679/213556/102502/243725/18751/116837/116838/110380/27428/208431/66616/80297/21916/22066/22288	32
GO:0008328	CC	GO:0008328	ionotropic glutamate receptor complex	20/1836	54/23177	1.98928e-09	3.08581e-08	2.12973e-08	76192/66082/12300/54377/13383/23859/14799/14802/14804/14805/14807/110637/14811/14812/242443/242274/243499/192167/210274/380702	20
GO:0048786	CC	GO:0048786	presynaptic active zone	27/1836	95/23177	2.92691e-09	4.43218e-08	3.05895e-08	319924/11941/381290/12217/12286/12289/12558/12386/320127/111173/238988/108073/14823/16531/17978/18189/80883/18212/327814/68507/67533/116837/116838/20273/210274/20908/208898	27
GO:0019898	CC	GO:0019898	extrinsic component of membrane	58/1836	323/23177	3.1672e-09	4.6845e-08	3.2331e-08	100986/12306/329015/12217/27062/12552/215654/12554/320865/227485/12558/104010/22295/381409/12561/12563/12565/12386/320127/13527/223254/14158/14360/14585/14675/14677/14681/14682/14683/14696/14697/14701/14702/14708/268566/29875/16497/70357/17096/50791/74302/74143/18704/18705/19041/19349/50779/20190/20191/66616/20840/78808/27204/83672/23964/21844/230895/22612	58
GO:0034704	CC	GO:0034704	calcium channel complex	21/1836	61/23177	3.69546e-09	5.34163e-08	3.68662e-08	238161/320508/12286/12288/12289/12290/12294/12298/12300/54377/76856/271036/216001/70729/18578/238871/171395/20190/20191/20192/22066	21
GO:0098878	CC	GO:0098878	neurotransmitter receptor complex	20/1836	56/23177	4.1673e-09	5.88979e-08	4.06495e-08	76192/66082/12300/54377/13383/23859/14799/14802/14804/14805/14807/110637/14811/14812/242443/242274/243499/192167/210274/380702	20
GO:0030016	CC	GO:0030016	myofibril	44/1836	215/23177	4.39645e-09	6.07856e-08	4.19524e-08	60595/11549/100041194/11733/109676/11735/381290/12288/12289/12345/76469/13007/13405/13518/14200/225288/14812/208727/26556/57339/140492/242702/74103/18125/70729/18175/380698/72333/18578/83679/329251/19165/20190/20191/20192/20273/319719/20541/66106/64009/118449/21916/21955/241431	44
GO:0099056	CC	GO:0099056	integral component of presynaptic membrane	30/1836	116/23177	4.64471e-09	6.28518e-08	4.33783e-08	23792/11549/11941/381290/12286/12288/12289/12290/12558/12565/13844/13869/242425/14799/14805/110637/14811/14812/108073/14823/16510/16519/16522/16531/17967/18189/19165/19266/20273/104245	30
GO:0098948	CC	GO:0098948	intrinsic component of postsynaptic specialization membrane	29/1836	111/23177	6.49753e-09	8.60923e-08	5.94182e-08	11941/12300/54377/12558/13176/23859/13869/14402/14657/14799/14802/14803/14804/14811/14812/242443/14816/269994/331461/70530/241568/242274/243499/192167/319504/19277/20273/380702/66673	29
GO:0099060	CC	GO:0099060	integral component of postsynaptic specialization membrane	28/1836	105/23177	7.20055e-09	9.34603e-08	6.45034e-08	11941/12300/54377/12558/13176/13869/14402/14657/14799/14802/14803/14804/14811/14812/242443/14816/269994/331461/70530/241568/242274/243499/192167/319504/19277/20273/380702/66673	28
GO:0098688	CC	GO:0098688	parallel fiber to Purkinje cell synapse	15/1836	33/23177	7.55321e-09	9.60768e-08	6.63092e-08	11941/320405/12308/53870/12386/14804/14811/14812/16510/16519/16522/18798/20273/104015/208898	15
GO:0030315	CC	GO:0030315	T-tubule	22/1836	70/23177	1.09273e-08	1.3462e-07	9.29108e-08	11549/11548/238161/432442/109676/11735/381290/12288/12289/54377/12558/13383/13982/16001/16519/140492/18125/70729/18754/20190/20541/20840	22
GO:0043292	CC	GO:0043292	contractile fiber	45/1836	229/23177	1.10067e-08	1.3462e-07	9.29108e-08	60595/11549/100041194/11733/109676/11735/381290/12288/12289/12345/76469/13007/13405/13518/14200/225288/14812/208727/26556/57339/140492/242702/74103/18125/70729/18175/380698/72333/18578/83679/18613/329251/19165/20190/20191/20192/20273/319719/20541/66106/64009/118449/21916/21955/241431	45
GO:0005912	CC	GO:0005912	adherens junction	33/1836	143/23177	1.75652e-08	2.10783e-07	1.45476e-07	230959/12552/215654/320865/227485/12558/104010/12563/12565/170788/12386/216033/18163/13383/13640/209630/232288/545370/230868/16774/108030/17096/14924/71602/93742/72823/227937/19274/110380/27428/208431/20411/80297	33
GO:0005604	CC	GO:0005604	basement membrane	29/1836	116/23177	1.90996e-08	2.2495e-07	1.55254e-07	12306/226255/12819/12822/213945/12827/12829/94216/13383/13640/268780/14118/231470/545370/665700/16772/16774/17181/230316/18073/18074/54631/80883/210530/12394/20317/64074/21858/22283	29
GO:0045121	CC	GO:0045121	membrane raft	62/1836	381/23177	4.38838e-08	5.07457e-07	3.50231e-07	210044/104111/238161/11600/101772/12306/11941/12288/108723/12491/12554/12558/13176/50768/13383/13405/13629/270190/13869/14360/14677/14682/14683/74053/56637/14964/16001/29875/16438/16531/16535/14725/66725/17096/17762/338367/74039/18125/70729/54631/18216/94212/59020/18613/19012/19088/18750/18762/19165/19206/76438/24012/78473/268706/319757/20411/20866/229277/240725/21960/22066/22095	62
GO:0098857	CC	GO:0098857	membrane microdomain	62/1836	382/23177	4.84196e-08	5.49043e-07	3.78932e-07	210044/104111/238161/11600/101772/12306/11941/12288/108723/12491/12554/12558/13176/50768/13383/13405/13629/270190/13869/14360/14677/14682/14683/74053/56637/14964/16001/29875/16438/16531/16535/14725/66725/17096/17762/338367/74039/18125/70729/54631/18216/94212/59020/18613/19012/19088/18750/18762/19165/19206/76438/24012/78473/268706/319757/20411/20866/229277/240725/21960/22066/22095	62
GO:0098862	CC	GO:0098862	cluster of actin-based cell projections	40/1836	201/23177	4.92066e-08	5.49043e-07	3.78932e-07	18671/110789/16790/14595/12308/12345/12491/22295/70737/65969/13131/13367/238130/433899/226413/240411/14725/71960/338367/71602/667663/329421/17919/17922/18261/11994/59020/192190/665270/102502/18751/56508/210274/26570/226999/21844/13409/252974/22283/67263	40
GO:0009898	CC	GO:0009898	cytoplasmic side of plasma membrane	36/1836	172/23177	5.9812e-08	6.55869e-07	4.5266e-07	230959/11733/13383/13518/13527/223254/14158/14360/14675/14677/14681/14682/14683/14696/14697/14701/14702/14708/268566/29875/16497/70357/56722/17096/17762/18216/227937/545622/19258/20190/20191/208431/66616/20840/21844/22612	36
GO:0030055	CC	GO:0030055	cell-substrate junction	37/1836	180/23177	6.45782e-08	6.96132e-07	4.80448e-07	231532/54126/233912/230837/12927/76707/235431/74106/67665/50768/13405/13518/223650/14026/230393/29875/319480/16398/16420/223272/16774/210126/50490/54631/18175/72333/244895/208177/20163/208431/66106/20411/118449/70549/21961/319939/241431	37
GO:0098562	CC	GO:0098562	cytoplasmic side of membrane	38/1836	189/23177	7.95673e-08	8.43413e-07	5.82098e-07	230959/11733/13383/13518/13527/13853/223254/14158/14360/14675/14677/14681/14682/14683/14696/14697/14701/14702/14708/268566/29875/16497/70357/56722/66725/17096/17762/18216/227937/545622/19258/20190/20191/208431/66616/20840/21844/22612	38
GO:0016324	CC	GO:0016324	apical plasma membrane	58/1836	354/23177	9.3173e-08	9.71444e-07	6.7046e-07	18671/271639/432442/75723/101772/11746/11941/11973/12289/12505/12558/12638/12804/65969/13132/213452/217837/16526/16531/14725/666339/245049/50490/246190/233571/23850/93742/72823/59020/241035/18805/27205/105787/108079/18762/19165/19277/80718/76089/56508/192786/210274/110380/27428/208431/20495/57738/20502/20518/19879/117591/94229/232156/50934/108116/20908/665113/22283	58
GO:0098802	CC	GO:0098802	plasma membrane signaling receptor complex	37/1836	187/23177	1.79797e-07	1.84437e-06	1.27293e-06	76192/66082/11658/12300/54377/12503/12804/13383/23859/242425/14799/14802/14804/14805/14807/110637/14811/14812/242443/14816/16001/319480/16398/241226/104099/381924/16420/223272/242274/243499/17096/192167/210274/380702/78473/20411/78808	37
GO:0099568	CC	GO:0099568	cytoplasmic region	42/1836	229/23177	2.50095e-07	2.52477e-06	1.74252e-06	76192/99371/68146/12217/73420/382090/100048534/76707/12386/56087/13411/110083/330355/227058/100101919/13417/237806/13426/110350/111173/238988/14633/14677/14807/244653/106633/16497/16579/66725/17756/17762/17919/208177/18762/116837/116838/77945/66722/74362/329795/239591/208898	42
GO:0044306	CC	GO:0044306	neuron projection terminus	40/1836	215/23177	3.2458e-07	3.22551e-06	2.22615e-06	269774/12217/12308/320127/330938/13405/12934/238988/13982/14402/14802/14805/14807/110637/14811/14812/108073/15165/16398/16443/16526/16531/66725/18125/18212/18216/18750/18751/19275/19276/56508/26563/94229/20541/20908/66860/22157/208898/22283/53611	40
GO:0016342	CC	GO:0016342	catenin complex	13/1836	32/23177	3.84103e-07	3.7583e-06	2.59386e-06	12552/215654/12554/320865/227485/12558/104010/22295/381409/12561/12563/12565/12386	13
GO:0043679	CC	GO:0043679	axon terminus	37/1836	193/23177	4.10902e-07	3.9596e-06	2.73279e-06	269774/12308/320127/330938/12934/238988/13982/14402/14802/14805/14807/110637/14811/14812/108073/15165/16398/16443/16526/16531/66725/18125/18212/18216/18750/18751/19275/19276/56508/26563/94229/20541/20908/66860/22157/208898/22283	37
GO:0031253	CC	GO:0031253	cell projection membrane	50/1836	301/23177	4.59151e-07	4.35851e-06	3.00811e-06	18671/11733/16790/69538/68146/13196/14595/74741/12289/12491/12505/66797/65969/269060/230073/13367/50768/13383/13405/13430/13823/14407/14799/15165/241226/16510/14725/17756/17762/338367/211323/59020/665270/27205/18751/234353/19876/268902/210274/380702/26570/50934/319757/71096/219140/21844/329795/252974/22283/22288	50
GO:0031234	CC	GO:0031234	extrinsic component of cytoplasmic side of plasma membrane	25/1836	105/23177	4.8736e-07	4.55825e-06	3.14596e-06	13527/223254/14158/14360/14675/14677/14681/14682/14683/14696/14697/14701/14702/14708/268566/29875/16497/70357/17096/20190/20191/66616/20840/21844/22612	25
GO:0044304	CC	GO:0044304	main axon	22/1836	85/23177	5.0504e-07	4.65515e-06	3.21284e-06	11733/11735/66797/269060/13383/23859/13823/16497/16510/242274/17756/17762/338367/319504/211323/93742/19876/268902/20273/20745/80297/21844	22
GO:0098686	CC	GO:0098686	hippocampal mossy fiber to CA3 synapse	16/1836	49/23177	6.07066e-07	5.51563e-06	3.80672e-06	432442/77531/12217/12300/12345/12565/12386/110637/14812/19085/19266/56508/210274/78808/60510/21960	16
GO:0005874	CC	GO:0005874	microtubule	63/1836	420/23177	6.77913e-07	6.07257e-06	4.1911e-06	99371/73910/192197/71276/73420/214444/382090/103268/76707/68511/244667/13383/110083/13417/13430/103967/12934/13518/13426/110350/67068/13548/68519/78798/56637/76478/320191/16348/29875/544963/16553/16558/16564/269152/75050/16572/319991/16579/102747/17756/17760/17762/77521/260315/210356/17978/83679/28193/26564/319229/110380/27428/20541/74362/29819/20866/104015/21844/106628/74410/320244/70892/239591	63
GO:0042641	CC	GO:0042641	actomyosin	23/1836	95/23177	1.00927e-06	8.91525e-06	6.15303e-06	226251/60595/12306/217866/235431/67665/50768/13518/208727/77113/77569/210126/71960/107589/50490/72333/18762/26563/208431/74206/20411/118449/241431	23
GO:0005891	CC	GO:0005891	voltage-gated calcium channel complex	14/1836	40/23177	1.18024e-06	1.02826e-05	7.09675e-06	320508/12286/12288/12289/12290/12294/12298/12300/54377/76856/271036/70729/18578/238871	14
GO:0062023	CC	GO:0062023	collagen-containing extracellular matrix	58/1836	386/23177	1.75326e-06	1.50686e-05	1.03998e-05	11492/216725/77739/11600/12306/11746/226255/12816/12818/12819/12822/237759/77018/213945/12827/12829/94216/13383/13640/268780/140703/74145/14118/14183/231470/103978/23888/545370/665700/16002/209378/16772/16774/268977/71738/17181/230316/78286/18073/18074/54631/80883/210530/67448/18845/116847/19699/12394/214968/20317/20563/64074/13602/233744/21858/21960/22283/22371	58
GO:0005925	CC	GO:0005925	focal adhesion	32/1836	167/23177	2.45428e-06	2.08123e-05	1.4364e-05	231532/54126/233912/230837/12927/76707/235431/74106/67665/50768/13518/14026/230393/29875/319480/16398/16420/223272/210126/50490/54631/72333/244895/208177/20163/208431/20411/118449/70549/21961/319939/241431	32
GO:0001725	CC	GO:0001725	stress fiber	21/1836	86/23177	2.53959e-06	2.09763e-05	1.44772e-05	226251/60595/12306/235431/67665/50768/13518/77113/77569/210126/71960/107589/50490/72333/18762/26563/208431/74206/20411/118449/241431	21
GO:0097517	CC	GO:0097517	contractile actin filament bundle	21/1836	86/23177	2.53959e-06	2.09763e-05	1.44772e-05	226251/60595/12306/235431/67665/50768/13518/77113/77569/210126/71960/107589/50490/72333/18762/26563/208431/74206/20411/118449/241431	21
GO:0099091	CC	GO:0099091	postsynaptic specialization, intracellular component	13/1836	37/23177	2.70441e-06	2.20513e-05	1.52191e-05	109934/77531/12386/13383/224997/13430/14360/268566/232227/17096/18125/66860/22612	13
GO:0032432	CC	GO:0032432	actin filament bundle	22/1836	95/23177	3.80077e-06	3.05986e-05	2.11182e-05	226251/60595/12306/235431/67665/50768/13518/77113/77569/210126/71960/107589/50490/72333/102502/18762/26563/208431/74206/20411/118449/241431	22
GO:0045178	CC	GO:0045178	basal part of cell	46/1836	288/23177	3.90282e-06	3.10275e-05	2.14142e-05	271639/230959/225638/11735/12306/381290/14595/24115/12505/12558/12638/76707/94219/12386/13383/23859/213452/223650/13869/15165/15925/16398/104099/16535/108030/16971/242274/338367/233571/208177/56508/19417/208431/114644/20518/210463/19879/117591/94229/54403/50934/20541/28250/108116/22066/22095	46
GO:0030659	CC	GO:0030659	cytoplasmic vesicle membrane	52/1836	342/23177	4.17016e-06	3.27435e-05	2.25986e-05	20927/100041194/11980/74741/27062/12638/65969/13132/227801/13383/23859/67753/14799/14964/15893/16438/16439/16535/240028/78771/245049/18197/18431/18484/18947/19276/80718/67295/19349/107746/20190/20191/20192/107767/89867/73094/229706/319757/66616/20908/78808/64176/27204/20980/60510/210789/72238/72160/329795/109181/208898/53611	52
GO:0031256	CC	GO:0031256	leading edge membrane	29/1836	150/23177	5.94944e-06	4.61444e-05	3.18474e-05	11733/69538/74741/12289/12505/66797/269060/230073/13367/50768/13430/13823/14407/14799/15165/241226/16510/17756/17762/338367/211323/234353/19876/268902/380702/71096/219140/21844/22283	29
GO:0008021	CC	GO:0008021	synaptic vesicle	40/1836	241/23177	6.3627e-06	4.87551e-05	3.36493e-05	20927/319924/11784/11980/12217/320127/244667/13383/23859/111173/20336/14799/14811/14812/15893/67703/66725/78771/18578/19165/19276/80718/67295/19349/235442/107767/229706/108800/20908/78808/64176/68666/27204/20980/60510/72160/208898/22365/53611/104082	40
GO:0034705	CC	GO:0034705	potassium channel complex	21/1836	91/23177	6.64527e-06	4.97222e-05	3.43167e-05	20927/66797/23859/269109/13483/14802/14805/14807/110637/15165/16497/240444/16510/70357/80334/16519/16526/16531/16535/226922/70729	21
GO:0043195	CC	GO:0043195	terminal bouton	21/1836	91/23177	6.64527e-06	4.97222e-05	3.43167e-05	269774/12308/12934/238988/13982/14402/14802/14805/14807/110637/14811/14812/108073/16531/66725/18212/18216/19276/20908/208898/22283	21
GO:0097440	CC	GO:0097440	apical dendrite	11/1836	29/23177	6.77387e-06	5.00952e-05	3.45741e-05	18605/14812/15165/16443/16572/17756/338367/74309/19017/19417/94229	11
GO:0032420	CC	GO:0032420	stereocilium	16/1836	58/23177	7.31561e-06	5.34796e-05	3.691e-05	110789/12308/22295/238130/433899/240411/667663/329421/18261/11994/192190/102502/13409/252974/22283/67263	16
GO:0048787	CC	GO:0048787	presynaptic active zone membrane	14/1836	46/23177	7.75845e-06	5.60725e-05	3.86995e-05	319924/11941/381290/12286/12289/12558/320127/108073/14823/16531/18189/80883/20273/20908	14
GO:0012506	CC	GO:0012506	vesicle membrane	54/1836	368/23177	7.97793e-06	5.70108e-05	3.93471e-05	20927/100041194/11746/11980/74741/27062/12638/65969/13132/227801/13383/23859/67753/14799/14964/15893/16438/16439/16535/240028/78771/245049/18125/18197/18431/18484/18947/19276/80718/67295/19349/107746/20190/20191/20192/107767/89867/73094/229706/319757/66616/20908/78808/64176/27204/20980/60510/210789/72238/72160/329795/109181/208898/53611	54
GO:0044291	CC	GO:0044291	cell-cell contact zone	20/1836	86/23177	9.66455e-06	6.82962e-05	4.71359e-05	11548/230959/238161/109676/11735/12345/12558/216033/13518/83964/18175/380698/211712/18613/227937/18750/20541/80297/21844/70549	20
GO:0070382	CC	GO:0070382	exocytic vesicle	42/1836	263/23177	1.01266e-05	7.07747e-05	4.88465e-05	20927/432442/319924/11784/11980/12217/320127/244667/13383/23859/111173/20336/14799/14811/14812/15893/67703/66725/78771/18578/19165/19276/80718/67295/19349/235442/107767/229706/108800/20908/78808/64176/68666/27204/20980/60510/83672/72160/208898/22365/53611/104082	42
GO:0098945	CC	GO:0098945	intrinsic component of presynaptic active zone membrane	11/1836	31/23177	1.42932e-05	9.88093e-05	6.81951e-05	11941/381290/12286/12289/12558/108073/14823/16531/18189/80883/20273	11
GO:0030673	CC	GO:0030673	axolemma	9/1836	21/23177	1.47143e-05	0.000100627	6.94496e-05	11733/66797/13823/16510/17762/338367/211323/19876/268902	9
GO:0099059	CC	GO:0099059	integral component of presynaptic active zone membrane	10/1836	26/23177	1.54702e-05	0.000104671	7.22406e-05	11941/381290/12286/12289/12558/108073/14823/16531/18189/20273	10
GO:0097730	CC	GO:0097730	non-motile cilium	30/1836	167/23177	1.87882e-05	0.000125782	8.6811e-05	11304/110789/243634/68146/22295/30952/14697/433899/106633/245866/16579/329421/245049/231042/11994/171395/241035/18750/56508/19739/77945/76816/210274/319757/21844/320244/70892/22157/22283/213081	30
GO:0032421	CC	GO:0032421	stereocilium bundle	17/1836	69/23177	1.9789e-05	0.000128427	8.86362e-05	110789/12308/22295/238130/433899/240411/667663/329421/18261/11994/192190/102502/21844/13409/252974/22283/67263	17
GO:0032589	CC	GO:0032589	neuron projection membrane	17/1836	69/23177	1.9789e-05	0.000128427	8.86362e-05	11733/12289/66797/269060/13823/14407/14799/15165/241226/16510/17762/338367/211323/19876/268902/380702/22283	17
GO:0043198	CC	GO:0043198	dendritic shaft	17/1836	69/23177	1.9789e-05	0.000128427	8.86362e-05	12288/20336/14799/108071/108073/56637/15165/26556/67703/17756/192167/18216/277360/19088/19165/20541/29819	17
GO:0032838	CC	GO:0032838	plasma membrane bounded cell projection cytoplasm	31/1836	177/23177	2.3092e-05	0.000148349	0.000102386	76192/99371/68146/12217/73420/382090/100048534/56087/13411/110083/330355/227058/100101919/13417/237806/13426/110350/14633/14807/244653/106633/16497/16579/66725/17756/17762/77945/66722/74362/329795/239591	31
GO:0009925	CC	GO:0009925	basal plasma membrane	41/1836	265/23177	2.7578e-05	0.000175396	0.000121053	230959/225638/11735/12306/381290/14595/24115/12505/12558/12638/94219/12386/13383/23859/213452/13869/15165/15925/104099/16535/108030/16971/242274/338367/233571/56508/19417/208431/114644/20518/210463/19879/117591/94229/54403/50934/20541/28250/108116/22066/22095	41
GO:0030027	CC	GO:0030027	lamellipodium	30/1836	172/23177	3.36626e-05	0.000211974	0.000146298	11308/226251/75723/69538/54126/12927/12345/12505/12558/12386/216033/13430/14026/14158/544963/16443/107589/72333/74055/18805/213556/243725/19274/59009/219140/14270/20257/20908/22253/245880	30
GO:0016323	CC	GO:0016323	basolateral plasma membrane	37/1836	232/23177	3.42298e-05	0.000213433	0.000147305	230959/225638/11735/12306/381290/14595/24115/12505/12558/12638/94219/12386/13383/23859/213452/13869/15165/15925/16535/108030/16971/242274/338367/233571/56508/19417/114644/20518/210463/19879/117591/94229/54403/50934/20541/22066/22095	37
GO:0030864	CC	GO:0030864	cortical actin cytoskeleton	19/1836	87/23177	4.09783e-05	0.000253031	0.000174634	12308/12558/12808/68511/50768/29875/71602/245049/18261/213556/102502/243725/18751/110380/27428/208431/66616/80297/22288	19
GO:0033017	CC	GO:0033017	sarcoplasmic reticulum membrane	9/1836	24/23177	5.26071e-05	0.000321712	0.000222036	238161/16439/57339/18125/70729/20190/20191/20192/20866	9
GO:0097731	CC	GO:0097731	9+0 non-motile cilium	24/1836	130/23177	7.91459e-05	0.000479398	0.000330866	11304/110789/30952/14697/106633/245866/16579/329421/245049/231042/11994/241035/18750/56508/19739/77945/76816/210274/319757/320244/70892/22157/22283/213081	24
GO:0016010	CC	GO:0016010	dystrophin-associated glycoprotein complex	8/1836	20/23177	8.08682e-05	0.000480674	0.000331746	13405/13527/24052/244431/20649/71096/16651/22288	8
GO:0090665	CC	GO:0090665	glycoprotein complex	8/1836	20/23177	8.08682e-05	0.000480674	0.000331746	13405/13527/24052/244431/20649/71096/16651/22288	8
GO:0005769	CC	GO:0005769	early endosome	42/1836	288/23177	8.93494e-05	0.000522119	0.00036035	12306/11981/12638/66797/269060/235567/227325/270190/67753/14799/16510/16535/16558/52662/15450/56722/231876/16971/17002/233280/18197/18212/231440/19165/52055/29809/107746/217835/320119/100502698/81840/20660/55943/81907/72160/67095/78610/77573/209018/69368/218441/230597	42
GO:0099092	CC	GO:0099092	postsynaptic density, intracellular component	10/1836	31/23177	8.94826e-05	0.000522119	0.00036035	109934/77531/12386/13383/224997/13430/14360/232227/18125/66860	10
GO:0005930	CC	GO:0005930	axoneme	24/1836	133/23177	0.000114756	0.0006635	0.000457927	99371/68146/73420/382090/100048534/56087/13411/110083/330355/227058/100101919/13417/237806/110350/14633/244653/106633/16579/17762/77945/66722/74362/329795/239591	24
GO:0098890	CC	GO:0098890	extrinsic component of postsynaptic membrane	7/1836	16/23177	0.000116726	0.000668807	0.00046159	100986/12386/320127/223254/50791/23964/21844	7
GO:0030286	CC	GO:0030286	dynein complex	14/1836	58/23177	0.000133181	0.000756277	0.000521959	67665/244667/56087/13411/110083/240960/330355/227058/100101919/13417/237806/13426/110350/67068	14
GO:0097014	CC	GO:0097014	ciliary plasm	24/1836	135/23177	0.000145813	0.00082068	0.000566408	99371/68146/73420/382090/100048534/56087/13411/110083/330355/227058/100101919/13417/237806/110350/14633/244653/106633/16579/17762/77945/66722/74362/329795/239591	24
GO:0030133	CC	GO:0030133	transport vesicle	47/1836	342/23177	0.000151829	0.000847043	0.000584603	20927/432442/319924/11784/11980/12217/78892/320127/244667/13383/23859/111173/20336/14683/14799/14811/14812/15893/67703/66725/78771/18578/19165/19276/80718/67295/19349/235442/107767/89867/229706/16651/108800/20908/78808/64176/68666/27204/20980/60510/83672/72160/208898/22365/53611/104082/230584	47
GO:0016529	CC	GO:0016529	sarcoplasmic reticulum	16/1836	75/23177	0.000216269	0.00119606	0.000825483	238161/432442/11733/11735/76469/16438/16439/57339/18125/70729/210530/20190/20191/20192/24052/20866	16
GO:0099243	CC	GO:0099243	extrinsic component of synaptic membrane	8/1836	23/23177	0.000253802	0.00139154	0.000960395	100986/12386/320127/223254/50791/78808/23964/21844	8
GO:0005903	CC	GO:0005903	brush border	24/1836	140/23177	0.000258287	0.00140402	0.000969012	18671/16790/14595/12345/12491/70737/65969/13131/13367/226413/14725/71960/338367/71602/17919/17922/59020/665270/102502/18751/56508/210274/26570/226999	24
GO:0016528	CC	GO:0016528	sarcoplasm	17/1836	84/23177	0.000272029	0.00146498	0.00101108	238161/432442/11733/11735/76469/16438/16439/57339/18125/70729/210530/20190/20191/20192/24052/20745/20866	17
GO:0005834	CC	GO:0005834	heterotrimeric G-protein complex	10/1836	35/23177	0.000276411	0.00146498	0.00101108	14675/14677/14681/14682/14683/14696/14697/14701/14702/14708	10
GO:1905360	CC	GO:1905360	GTPase complex	10/1836	35/23177	0.000276411	0.00146498	0.00101108	14675/14677/14681/14682/14683/14696/14697/14701/14702/14708	10
GO:0043296	CC	GO:0043296	apical junction complex	26/1836	158/23177	0.000286558	0.0015062	0.00103953	75723/11735/70737/68178/56173/74987/230073/13383/223650/209630/232288/319710/72058/83964/108030/14924/50791/99470/93742/72823/18762/76089/110380/27428/208431/68188	26
GO:0014704	CC	GO:0014704	intercalated disc	14/1836	63/23177	0.000337727	0.00176061	0.00121512	11548/238161/109676/11735/12345/12558/216033/13518/18175/380698/18750/20541/80297/70549	14
GO:0008076	CC	GO:0008076	voltage-gated potassium channel complex	16/1836	78/23177	0.000347056	0.00179453	0.00123853	66797/23859/269109/13483/15165/16497/240444/16510/70357/80334/16519/16526/16531/16535/226922/70729	16
GO:0060077	CC	GO:0060077	inhibitory synapse	8/1836	24/23177	0.0003544	0.00181773	0.00125454	12217/76380/14402/268566/230868/18189/116837/116838	8
GO:0005902	CC	GO:0005902	microvillus	19/1836	102/23177	0.000375335	0.0019097	0.00131802	11600/11973/12505/12638/170788/13383/20336/544963/83964/15450/66725/666339/338367/71602/17922/59020/27205/50934/80707	19
GO:0005875	CC	GO:0005875	microtubule associated complex	25/1836	154/23177	0.000458131	0.00231247	0.001596	67665/244667/56087/13411/110083/240960/330355/227058/100101919/13417/237806/13426/110350/67068/14272/76478/16553/16558/16564/269152/75050/16572/319991/16579/17756	25
GO:0005923	CC	GO:0005923	bicellular tight junction	23/1836	137/23177	0.000467498	0.00234117	0.0016158	75723/11735/70737/68178/56173/74987/230073/13383/223650/209630/232288/72058/83964/108030/14924/50791/99470/93742/72823/18762/76089/110380/68188	23
GO:0070160	CC	GO:0070160	tight junction	24/1836	146/23177	0.000489134	0.00243039	0.00167738	75723/11735/70737/68178/56173/74987/230073/13383/223650/209630/232288/72058/83964/108030/14924/50791/99470/93742/72823/18762/76089/110380/74206/68188	24
GO:0031672	CC	GO:0031672	A band	10/1836	38/23177	0.000571885	0.00281953	0.00194595	11733/109676/13518/14200/208727/242702/380698/329251/20191/66106	10
GO:0098831	CC	GO:0098831	presynaptic active zone cytoplasmic component	7/1836	20/23177	0.000596299	0.00291728	0.00201341	12217/12386/111173/238988/116837/116838/208898	7
GO:0001917	CC	GO:0001917	photoreceptor inner segment	13/1836	60/23177	0.000704154	0.00341864	0.00235944	22295/170788/13430/103967/14697/667663/329421/18125/56508/19739/210274/22157/22283	13
GO:0099738	CC	GO:0099738	cell cortex region	12/1836	53/23177	0.000737322	0.00355255	0.00245186	12217/76707/12386/111173/238988/14677/17919/208177/18762/116837/116838/208898	12
GO:0044295	CC	GO:0044295	axonal growth cone	11/1836	46/23177	0.000745293	0.00356396	0.00245973	12808/16971/14725/17762/18189/72333/93742/19206/319757/21844/67095	11
GO:0043204	CC	GO:0043204	perikaryon	23/1836	142/23177	0.000782808	0.00371542	0.00256426	12286/12290/18163/239667/13853/13982/14807/110637/241226/16497/16572/66725/26414/54003/18212/18216/18484/18549/18552/23984/18585/52897/19699	23
GO:0097733	CC	GO:0097733	photoreceptor cell cilium	20/1836	117/23177	0.000842847	0.00397075	0.00274049	11304/110789/30952/14697/106633/245866/16579/329421/245049/231042/11994/18750/56508/19739/77945/76816/210274/22157/22283/213081	20
GO:0099569	CC	GO:0099569	presynaptic cytoskeleton	5/1836	11/23177	0.000954925	0.00446568	0.00308207	12217/111173/238988/116837/116838	5
GO:0000242	CC	GO:0000242	pericentriolar material	7/1836	22/23177	0.00113972	0.00529095	0.00365165	100986/319845/214444/320191/18004/21844/74493	7
GO:0032281	CC	GO:0032281	AMPA glutamate receptor complex	8/1836	29/23177	0.00144771	0.00667204	0.00460483	76192/66082/12300/54377/14799/14802/243499/380702	8
GO:0044853	CC	GO:0044853	plasma membrane raft	21/1836	131/23177	0.0014803	0.00677317	0.00467463	238161/12288/12491/12554/12558/50768/13869/14682/16001/16531/66725/338367/18125/70729/19012/19206/78473/319757/20411/20866/22066	21
GO:0005901	CC	GO:0005901	caveola	17/1836	97/23177	0.00151097	0.00685512	0.00473119	238161/12288/12491/12554/50768/13869/14682/16001/16531/66725/18125/70729/19012/19206/319757/20411/22066	17
GO:0001726	CC	GO:0001726	ruffle	23/1836	149/23177	0.00152435	0.00685512	0.00473119	78618/12306/73910/230837/12927/74741/12571/12808/230073/13367/50768/13430/232288/14683/29875/17756/72333/18613/234353/71096/219140/21844/70549	23
GO:0036156	CC	GO:0036156	inner dynein arm	5/1836	12/23177	0.00153055	0.00685512	0.00473119	56087/110083/330355/227058/100101919	5
GO:0005795	CC	GO:0005795	Golgi stack	16/1836	89/23177	0.00155975	0.00693705	0.00478774	100986/14595/234356/53618/108148/14964/15893/18197/18552/18805/80718/208449/76775/20660/233781/230584	16
GO:0005581	CC	GO:0005581	collagen trimer	15/1836	81/23177	0.00158727	0.00701044	0.00483838	320924/12816/12818/12819/12822/12823/237759/77018/140709/213945/12827/12829/94216/13607/140703	15
GO:0031594	CC	GO:0031594	neuromuscular junction	17/1836	98/23177	0.00169583	0.00743827	0.00513366	11735/69090/13383/23859/14799/208727/211323/55983/243725/18754/19165/20745/78808/207227/20980/208898/22288	17
GO:0030667	CC	GO:0030667	secretory granule membrane	16/1836	90/23177	0.00176019	0.00766769	0.005292	27062/67753/15893/16438/16439/16535/245049/18484/18947/19276/80718/107767/20908/78808/60510/109181	16
GO:0010008	CC	GO:0010008	endosome membrane	32/1836	236/23177	0.00198503	0.00858073	0.00592215	66082/78618/12306/269060/235567/270190/103199/14799/16510/16553/52662/56722/17533/17919/17972/18197/18431/268451/80718/19349/107767/268706/236727/81840/55943/72238/81907/72160/22365/53611/218441/230597	32
GO:0030136	CC	GO:0030136	clathrin-coated vesicle	18/1836	108/23177	0.00200666	0.00858073	0.00592215	74438/215890/13132/227801/13430/68421/16971/71602/18704/80718/235442/107767/73094/66616/108800/72238/53611/22371	18
GO:0099523	CC	GO:0099523	presynaptic cytosol	7/1836	24/23177	0.00201026	0.00858073	0.00592215	77531/66725/327814/18750/18751/18754/78808	7
GO:0030672	CC	GO:0030672	synaptic vesicle membrane	19/1836	118/23177	0.00230458	0.00970671	0.00669927	20927/11980/13383/23859/14799/15893/78771/19276/80718/67295/19349/107767/229706/64176/27204/20980/60510/72160/208898	19
GO:0099501	CC	GO:0099501	exocytic vesicle membrane	19/1836	118/23177	0.00230458	0.00970671	0.00669927	20927/11980/13383/23859/14799/15893/78771/19276/80718/67295/19349/107767/229706/64176/27204/20980/60510/72160/208898	19
GO:0031430	CC	GO:0031430	M band	6/1836	19/23177	0.00269881	0.0111457	0.00769243	11733/109676/14200/242702/380698/66106	6
GO:0033268	CC	GO:0033268	node of Ranvier	6/1836	19/23177	0.00269881	0.0111457	0.00769243	11735/13383/319504/20273/20745/80297	6
GO:0043034	CC	GO:0043034	costamere	6/1836	19/23177	0.00269881	0.0111457	0.00769243	100041194/109676/76469/13405/26556/66106	6
GO:0098636	CC	GO:0098636	protein complex involved in cell adhesion	9/1836	39/23177	0.00288645	0.0118437	0.00817419	319480/16398/241226/104099/381924/16420/223272/83964/17096	9
GO:0016459	CC	GO:0016459	myosin complex	11/1836	54/23177	0.00298036	0.0121507	0.00838604	70737/68178/77569/71960/244281/338367/71602/667663/329421/17919/17922	11
GO:0030175	CC	GO:0030175	filopodium	16/1836	95/23177	0.00311434	0.0126161	0.00870722	11308/69538/66205/13405/270190/544963/242274/17756/667663/329421/192167/72333/243725/219140/22253/22288	16
GO:0005858	CC	GO:0005858	axonemal dynein complex	7/1836	26/23177	0.00332206	0.0133723	0.00922917	56087/110083/330355/227058/100101919/13417/237806	7
GO:0032045	CC	GO:0032045	guanyl-nucleotide exchange factor complex	5/1836	14/23177	0.00338354	0.0134496	0.00928247	320127/330662/140580/18576/240168	5
GO:0042589	CC	GO:0042589	zymogen granule membrane	5/1836	14/23177	0.00338354	0.0134496	0.00928247	16535/18947/80718/107767/20908	5
GO:0043194	CC	GO:0043194	axon initial segment	6/1836	20/23177	0.00359988	0.0141329	0.00975406	11735/242274/17756/319504/20273/80297	6
GO:0044292	CC	GO:0044292	dendrite terminus	6/1836	20/23177	0.00359988	0.0141329	0.00975406	12808/245866/17756/19206/24012/319757	6
GO:0005802	CC	GO:0005802	trans-Golgi network	31/1836	237/23177	0.00400778	0.0156377	0.0107927	11764/69710/99371/11980/11981/50771/12217/140904/74438/215890/13430/210998/14348/14683/16553/80877/66725/26422/18197/18484/18552/18704/268859/107767/76775/236727/66616/20660/55943/76510/230584	31
GO:0031985	CC	GO:0031985	Golgi cisterna	12/1836	64/23177	0.00404492	0.0156864	0.0108263	14595/234356/53618/14964/18197/18552/18805/208449/76775/20660/233781/230584	12
GO:0008305	CC	GO:0008305	integrin complex	8/1836	34/23177	0.00429596	0.016559	0.0114285	319480/16398/241226/104099/381924/16420/223272/17096	8
GO:0030139	CC	GO:0030139	endocytic vesicle	27/1836	201/23177	0.00483732	0.0185333	0.0127911	65969/69601/13430/14026/14964/16443/16558/68421/14725/71602/18189/18805/268451/52055/19349/235442/107746/76089/192786/217835/73094/319757/14270/56324/55943/72238/78610	27
GO:0005635	CC	GO:0005635	nuclear envelope	48/1836	415/23177	0.00531954	0.0202589	0.013982	11549/11548/633979/238161/11746/237911/13360/13518/67030/14773/15483/269180/16438/16443/16510/380664/74071/14245/17120/260315/338352/18125/70729/18189/103468/231042/71720/237542/101187/228829/98432/18705/18762/19165/223332/380711/24012/20191/212531/117591/20660/29819/64009/209361/52837/74493/231861/69922	48
GO:0044224	CC	GO:0044224	juxtaparanode region of axon	4/1836	10/23177	0.00558691	0.0211504	0.0145974	66797/23859/13823/16497	4
GO:0005790	CC	GO:0005790	smooth endoplasmic reticulum	8/1836	36/23177	0.00621727	0.0233975	0.0161483	16438/140492/17756/338367/18798/20190/20191/20192	8
GO:0030658	CC	GO:0030658	transport vesicle membrane	21/1836	149/23177	0.00702596	0.0262854	0.0181413	20927/11980/13383/23859/14799/15893/78771/19276/80718/67295/19349/107767/89867/229706/64176/27204/20980/60510/72160/208898/53611	21
GO:1990454	CC	GO:1990454	L-type voltage-gated calcium channel complex	4/1836	11/23177	0.00823376	0.0306238	0.0211356	12288/12289/54377/70729	4
GO:0005614	CC	GO:0005614	interstitial matrix	5/1836	17/23177	0.00856338	0.0314816	0.0217276	12818/268780/71738/78286/64074	5
GO:0033270	CC	GO:0033270	paranode region of axon	5/1836	17/23177	0.00856338	0.0314816	0.0217276	11735/66797/13383/13823/80297	5
GO:0031965	CC	GO:0031965	nuclear membrane	30/1836	241/23177	0.00919413	0.0336061	0.0231939	11549/11548/633979/238161/11746/237911/13360/14773/15483/269180/16438/16510/380664/14245/18125/70729/18189/103468/71720/237542/228829/98432/19165/380711/212531/29819/64009/209361/52837/231861	30
GO:0098791	CC	GO:0098791	Golgi apparatus subcompartment	53/1836	482/23177	0.00955234	0.0347159	0.0239599	66190/100986/11764/69710/99371/11980/11981/50771/26877/14595/80748/12217/140904/74438/215890/234356/13430/67458/210998/53618/14348/108148/14683/67839/14964/209462/15893/16553/52662/80877/66725/17155/26422/18197/18484/18552/18704/18805/18754/80718/268859/107767/208449/74442/76775/236727/66616/20660/55943/76510/22365/233781/230584	53
GO:0055037	CC	GO:0055037	recycling endosome	21/1836	154/23177	0.0101422	0.03665	0.0252947	99371/11981/12638/13426/103199/14683/14799/74053/231876/17002/78771/17919/268451/52055/107767/236727/81840/20660/55943/665113/224705	21
GO:0032433	CC	GO:0032433	filopodium tip	5/1836	18/23177	0.0110963	0.0398385	0.0274953	11308/270190/667663/329421/192167	5
GO:0031901	CC	GO:0031901	early endosome membrane	11/1836	64/23177	0.0112124	0.0398385	0.0274953	269060/235567/270190/14799/16510/52662/56722/81840/72160/218441/230597	11
GO:0098563	CC	GO:0098563	intrinsic component of synaptic vesicle membrane	11/1836	64/23177	0.0112124	0.0398385	0.0274953	11980/19276/80718/67295/19349/107767/229706/64176/20980/60510/72160	11
GO:0017146	CC	GO:0017146	NMDA selective glutamate receptor complex	4/1836	12/23177	0.0115854	0.0404851	0.0279416	14811/14812/242443/192167	4
GO:0032591	CC	GO:0032591	dendritic spine membrane	4/1836	12/23177	0.0115854	0.0404851	0.0279416	269060/14799/241226/380702	4
GO:0044294	CC	GO:0044294	dendritic growth cone	4/1836	12/23177	0.0115854	0.0404851	0.0279416	12808/17756/19206/319757	4
GO:0099522	CC	GO:0099522	region of cytosol	8/1836	40/23177	0.0119279	0.0414542	0.0286104	77531/26556/66725/327814/18750/18751/18754/78808	8
GO:0099144	CC	GO:0099144	anchored component of synaptic membrane	5/1836	19/23177	0.0140954	0.0487209	0.0336256	244682/53870/23859/268566/80883	5
GO:0001750	CC	GO:0001750	photoreceptor outer segment	13/1836	84/23177	0.0145898	0.0501573	0.034617	11304/30952/14697/106633/329421/245049/231042/11994/18750/56508/19739/210274/22157	13
GO:0031225	CC	GO:0031225	anchored component of membrane	25/1836	199/23177	0.0146796	0.0501947	0.0346428	12554/12804/18488/269784/244682/53870/23859/67484/13640/14585/103978/23888/268566/230868/268890/320772/17967/17968/320840/235106/80883/246190/80718/67295/19349	25
GO:0031045	CC	GO:0031045	dense core granule	7/1836	34/23177	0.0155968	0.0528343	0.0364646	27062/245049/104245/78808/207227/20980/60510	7
GO:0005916	CC	GO:0005916	fascia adherens	4/1836	13/23177	0.0157008	0.0528343	0.0364646	12558/216033/18175/70549	4
GO:0032437	CC	GO:0032437	cuticular plate	4/1836	13/23177	0.0157008	0.0528343	0.0364646	12308/71602/18261/66616	4
GO:0034706	CC	GO:0034706	sodium channel complex	6/1836	27/23177	0.0170728	0.057149	0.0394424	14802/14805/14807/110637/110880/20273	6
GO:0031514	CC	GO:0031514	motile cilium	27/1836	223/23177	0.0180984	0.0602648	0.0415929	271639/100986/68146/381290/12345/76856/214552/100048534/68511/13411/13417/237806/110350/226265/320118/14633/380614/69032/69310/56523/66722/74362/320277/21336/211484/213081/269701	27
GO:0030135	CC	GO:0030135	coated vesicle	24/1836	194/23177	0.0196146	0.0649735	0.0448427	74438/215890/65969/13132/227801/13430/67458/14683/15932/68421/16971/71602/107975/18704/80718/235442/107767/89867/73094/66616/108800/72238/53611/22371	24
GO:0005871	CC	GO:0005871	kinesin complex	9/1836	52/23177	0.0198833	0.0655222	0.0452214	244667/16553/16558/16564/269152/75050/16572/319991/16579	9
GO:0098690	CC	GO:0098690	glycinergic synapse	4/1836	14/23177	0.0206276	0.0672779	0.0464331	14657/14658/268566/104245	4
GO:0098871	CC	GO:0098871	postsynaptic actin cytoskeleton	4/1836	14/23177	0.0206276	0.0672779	0.0464331	70598/16443/17919/243725	4
GO:0005905	CC	GO:0005905	clathrin-coated pit	11/1836	70/23177	0.0211883	0.068405	0.047211	269774/65969/13132/13430/14269/16443/16971/14725/73094/104015/72238	11
GO:0099023	CC	GO:0099023	vesicle tethering complex	11/1836	70/23177	0.0211883	0.068405	0.047211	338337/233824/20336/320191/245049/71169/118449/76510/77573/224705/209018	11
GO:0032426	CC	GO:0032426	stereocilium tip	5/1836	21/23177	0.0216212	0.0694499	0.0479321	22295/667663/329421/192190/13409	5
GO:0030695	MF	GO:0030695	GTPase regulator activity	95/1802	422/22682	6.37052e-21	6.38326e-18	5.1903e-18	109934/78618/210933/347722/69710/212285/99371/215821/78514/76117/73910/244867/71435/239027/231532/71302/330914/11856/72754/71704/381112/54126/13196/230837/69993/69601/227801/320127/50768/330662/94176/208869/238130/68813/67299/105445/140580/223254/14682/14697/67839/29875/544963/232227/16443/545156/66725/56349/380698/18795/74055/277360/234353/29809/241694/223332/380711/107746/76089/56508/217944/192…	95
GO:0060589	MF	GO:0060589	nucleoside-triphosphatase regulator activity	96/1802	463/22682	1.61109e-18	8.07155e-16	6.56306e-16	109934/78618/210933/347722/69710/212285/99371/215821/78514/76117/73910/244867/71435/239027/231532/71302/330914/11856/72754/71704/381112/54126/13196/230837/69993/69601/227801/320127/50768/330662/94176/208869/238130/68813/67299/105445/140580/223254/14682/14697/67839/66245/29875/544963/232227/16443/545156/66725/56349/380698/18795/74055/277360/234353/29809/241694/223332/380711/107746/76089/56508/2179…	96
GO:0005096	MF	GO:0005096	GTPase activator activity	59/1802	238/22682	1.76775e-15	5.19329e-13	4.22272e-13	109934/78618/210933/347722/69710/212285/78514/76117/73910/244867/71435/239027/231532/71302/330914/11856/72754/13196/230837/69993/69601/50768/330662/94176/238130/68813/14682/14697/29875/544963/66725/18795/29809/241694/223332/380711/76089/240168/56533/50779/24012/19739/74030/217835/217692/244668/74206/117600/14270/243362/78808/207227/223754/381085/210789/72238/71310/24001/98910	59
GO:0050839	MF	GO:0050839	cell adhesion molecule binding	66/1802	287/22682	2.07317e-15	5.19329e-13	4.22272e-13	11735/14595/12552/215654/12554/320865/227485/12558/104010/22295/381409/12561/12563/12565/244682/53870/12386/216033/54366/18163/13132/13508/114873/13612/14118/14158/14585/14811/14812/56637/16002/319480/16398/16420/223272/83964/67703/16774/241568/17096/192167/54631/319504/18189/18190/80883/380698/227937/18750/71461/19263/19266/19274/19277/19281/27411/23963/23964/23965/23966/21858/70549/21960/22066/…	66
GO:0005216	MF	GO:0005216	ion channel activity	82/1802	418/22682	1.42526e-14	2.85623e-12	2.32243e-12	20927/101772/102566/243634/320091/12306/11418/241118/24115/320508/12286/12288/12289/12290/12294/12298/12300/54377/76856/12638/229927/30952/111173/270028/14402/14407/14657/14658/14799/14802/14803/14804/14805/14807/110637/14811/14812/242443/108073/15165/16438/16439/16497/240444/16510/170738/70357/80334/16519/16522/72258/217826/16526/16531/140492/16535/226922/240776/16532/433926/231549/171166/338370…	82
GO:0005261	MF	GO:0005261	cation channel activity	68/1802	323/22682	7.85445e-14	1.31169e-11	1.06655e-11	20927/101772/102566/12306/11418/241118/320508/12286/12288/12289/12290/12294/12298/12300/54377/76856/30952/111173/270028/14799/14802/14805/14807/110637/14811/14812/242443/108073/15165/16438/16439/16497/240444/16510/170738/70357/80334/16519/16522/72258/217826/16526/16531/140492/16535/226922/240776/16532/171166/338370/21906/667742/171395/76645/20190/20191/20192/110880/20273/94249/20866/116873/13409/…	68
GO:0004674	MF	GO:0004674	protein serine/threonine kinase activity	80/1802	440/22682	1.97666e-12	2.82945e-10	2.30066e-10	269774/72113/23797/71481/225638/57261/227541/217866/18647/271697/237459/12571/264064/213084/69635/13143/70762/213452/13548/13631/15467/27103/14773/56637/26559/56489/545156/16706/333050/231876/233328/66725/23938/26399/71751/26407/26409/338372/225028/399510/26414/225724/232944/328329/17279/107589/667663/329421/18004/208583/330721/59125/18099/380698/108737/105787/108079/108099/18750/18751/18754/1875…	80
GO:0015267	MF	GO:0015267	channel activity	82/1802	464/22682	4.86032e-12	5.41115e-10	4.39987e-10	20927/101772/102566/243634/320091/12306/11418/241118/24115/320508/12286/12288/12289/12290/12294/12298/12300/54377/76856/12638/229927/30952/111173/270028/14402/14407/14657/14658/14799/14802/14803/14804/14805/14807/110637/14811/14812/242443/108073/15165/16438/16439/16497/240444/16510/170738/70357/80334/16519/16522/72258/217826/16526/16531/140492/16535/226922/240776/16532/433926/231549/171166/338370…	82
GO:0022803	MF	GO:0022803	passive transmembrane transporter activity	82/1802	464/22682	4.86032e-12	5.41115e-10	4.39987e-10	20927/101772/102566/243634/320091/12306/11418/241118/24115/320508/12286/12288/12289/12290/12294/12298/12300/54377/76856/12638/229927/30952/111173/270028/14402/14407/14657/14658/14799/14802/14803/14804/14805/14807/110637/14811/14812/242443/108073/15165/16438/16439/16497/240444/16510/170738/70357/80334/16519/16522/72258/217826/16526/16531/140492/16535/226922/240776/16532/433926/231549/171166/338370…	82
GO:0046873	MF	GO:0046873	metal ion transmembrane transporter activity	77/1802	426/22682	6.9651e-12	6.5605e-10	5.33441e-10	20927/12306/11418/241118/224079/11941/381290/320508/12286/12288/12289/12290/12294/12298/12300/54377/76856/94219/111173/270028/14805/14807/110637/14811/14812/242443/108073/15165/16438/16439/16497/240444/16510/170738/70357/80334/16519/16522/72258/217826/16526/16531/140492/16535/226922/240776/16532/171166/338370/233280/171395/76645/20190/20191/20192/110880/20273/20495/114644/20519/94249/69806/94229/…	77
GO:0022836	MF	GO:0022836	gated channel activity	64/1802	323/22682	7.20214e-12	6.5605e-10	5.33441e-10	101772/102566/243634/11418/241118/320508/12286/12288/12289/12290/12294/12298/12300/54377/76856/12638/229927/30952/111173/270028/14402/14407/14657/14658/14799/14802/14803/14804/14805/14807/110637/14811/14812/242443/108073/15165/16438/16439/16497/240444/16510/170738/70357/80334/16519/16522/217826/16526/16531/140492/16535/226922/240776/16532/171166/338370/667742/20190/20191/20192/110880/20273/13409/…	64
GO:0045296	MF	GO:0045296	cadherin binding	25/1802	69/22682	3.61145e-11	3.01556e-09	2.45199e-09	11735/12552/215654/12554/320865/227485/12558/104010/22295/381409/12561/12563/12565/12386/216033/54366/18163/14158/380698/227937/19263/19274/19277/19281/22066	25
GO:0015085	MF	GO:0015085	calcium ion transmembrane transporter activity	36/1802	134/22682	4.59823e-11	3.54417e-09	2.88181e-09	12306/224079/11941/381290/320508/12286/12288/12289/12290/12294/12298/12300/54377/76856/111173/270028/14811/14812/242443/108073/16438/16439/171166/171395/76645/20190/20191/20192/94249/20541/20866/116873/13409/22066/26946/17364	36
GO:0003779	MF	GO:0003779	actin binding	76/1802	437/22682	6.48689e-11	4.64276e-09	3.77507e-09	226251/60595/242894/69538/66898/67252/12345/12808/235431/12386/216033/54366/13367/56419/330938/13405/13518/13548/13629/13823/14026/14158/225288/14260/29875/544963/57748/16531/93688/77113/77569/66725/17756/194401/71960/107589/244281/338367/71602/667663/329421/17919/208943/17922/242702/245049/52589/74103/18175/69310/72333/218194/215789/213556/102502/243725/18754/19201/218699/110380/27428/208431/217…	76
GO:0005262	MF	GO:0005262	calcium channel activity	32/1802	116/22682	2.58416e-10	1.72622e-08	1.40361e-08	12306/320508/12286/12288/12289/12290/12294/12298/12300/54377/76856/111173/270028/14811/14812/242443/108073/16438/16439/171166/171395/76645/20190/20191/20192/94249/20866/116873/13409/22066/26946/17364	32
GO:0042578	MF	GO:0042578	phosphoric ester hydrolase activity	64/1802	356/22682	5.21308e-10	3.26469e-08	2.65456e-08	66408/240672/18605/13853/14048/14049/103199/233537/14682/14683/269180/234515/212111/76429/14245/74249/66725/17330/74302/23984/18573/18575/54611/18576/18578/238871/242202/29863/218461/18585/18639/98432/18795/18798/74055/234779/227120/224860/18805/19012/381925/272031/18979/74776/320472/319468/242083/19248/19250/545622/19258/19263/19266/19270/19274/19275/19276/19277/19279/19281/19273/235534/24018/10…	64
GO:0035091	MF	GO:0035091	phosphatidylinositol binding	52/1802	264/22682	8.22216e-10	4.84624e-08	3.94053e-08	78618/108909/12306/319924/69710/212285/330914/13196/329015/27062/74438/215890/13132/69601/26377/227801/333605/14389/15165/29875/544963/16438/16439/16510/16535/16558/71602/17972/380698/237542/93742/72823/18704/18705/71795/18795/18805/218699/320119/100502698/319934/170755/69226/102141/74478/66616/60510/22157/69368/142682/218441/230597	52
GO:0005085	MF	GO:0005085	guanyl-nucleotide exchange factor activity	43/1802	197/22682	8.9667e-10	4.99146e-08	4.05861e-08	109934/99371/215821/72754/71704/381112/54126/227801/330662/94176/208869/238130/68813/67299/105445/140580/223254/232227/16443/545156/56349/380698/74055/277360/234353/107746/76089/56508/217944/192786/19417/240168/217835/319934/27414/20662/20663/219140/21844/24001/223435/22325/57257	43
GO:0017124	MF	GO:0017124	SH3 domain binding	33/1802	129/22682	1.16395e-09	6.13832e-08	4.99113e-08	11308/11489/11492/106877/11856/12927/69601/227801/13430/330662/208869/238130/140580/14026/14260/53618/170771/13992/14725/17096/225028/17762/18754/19248/116837/73094/212531/210274/20662/104015/71943/78610/330319	33
GO:0008066	MF	GO:0008066	glutamate receptor activity	14/1802	26/22682	1.47188e-09	7.3741e-08	5.99596e-08	14799/14802/14803/14804/14805/14807/110637/14811/14812/242443/14816/108071/108073/14823	14
GO:0005543	MF	GO:0005543	phospholipid binding	73/1802	450/22682	3.66017e-09	1.74642e-07	1.42004e-07	78618/347722/108909/26359/12306/11746/319924/11814/69710/212285/71302/330914/13196/329015/74741/27062/74438/215890/74020/13131/13132/69601/26377/227801/333605/14389/15165/29875/544963/16438/16439/16510/16535/16558/71602/17972/380698/74143/74486/237542/93742/72823/18704/18705/71795/18795/18805/18979/277360/218699/76089/192786/320119/100502698/319934/73094/170755/69226/102141/74478/66616/329324/238…	73
GO:0005516	MF	GO:0005516	calmodulin binding	41/1802	192/22682	4.33563e-09	1.97468e-07	1.60564e-07	104111/11941/381290/12286/12288/227541/214444/226356/69635/13143/13631/26381/108073/16348/29875/544963/16510/140492/16535/226922/17756/17760/71960/107589/338367/71602/667663/17919/18125/380698/18573/18575/18795/20190/20191/20192/20541/20649/74717/69116/208898	41
GO:0008047	MF	GO:0008047	enzyme activator activity	75/1802	470/22682	4.68256e-09	2.03997e-07	1.65872e-07	11308/109934/78618/210933/347722/11813/69710/212285/78514/76117/73910/244867/71435/239027/231532/71302/330914/11856/72754/13196/230837/192197/69993/624855/69601/50768/330662/94176/238130/68813/14682/14683/14697/16002/29875/544963/16443/66725/17002/17972/211323/18795/26932/108099/18754/29809/241694/223332/380711/76089/240168/56533/50779/24012/19739/74030/217835/74370/217692/244668/74206/117600/142…	75
GO:0044325	MF	GO:0044325	ion channel binding	33/1802	143/22682	1.8784e-08	7.84231e-07	6.37667e-07	20927/60595/238161/11733/109676/11735/12288/66797/13367/13383/269109/14167/14360/26556/16438/16439/16497/16510/70357/16535/66725/17096/83814/18125/107975/18578/238871/243725/116837/116838/20541/20840/22612	33
GO:0003774	MF	GO:0003774	motor activity	30/1802	126/22682	3.86915e-08	1.55076e-06	1.26094e-06	70737/68178/56087/13411/110083/240960/330355/227058/100101919/13417/237806/13426/110350/67068/16553/16558/16564/269152/75050/16572/319991/71960/244281/338367/71602/667663/329421/17919/208943/17922	30
GO:0030165	MF	GO:0030165	PDZ domain binding	28/1802	115/22682	6.53069e-08	2.51683e-06	2.04646e-06	319924/11941/381290/12289/12638/50766/13383/23859/238130/13527/111173/238988/20336/14701/14799/14804/108073/72058/67703/14725/17978/192167/70729/59020/83436/76089/380702/20649	28
GO:0031267	MF	GO:0031267	small GTPase binding	48/1802	270/22682	1.05059e-07	3.89887e-06	3.17021e-06	78618/12306/54126/217866/227801/320127/13367/56419/238130/67299/105445/111173/20336/320051/223254/14158/14799/209462/230673/29875/544963/16558/66725/194401/17919/245049/56349/74055/243819/18755/268451/52055/19349/29809/56508/192786/19417/240168/116837/116838/217835/20660/117600/14270/83672/238799/109181/98910	48
GO:0015631	MF	GO:0015631	tubulin binding	60/1802	373/22682	1.20389e-07	4.3082e-06	3.50305e-06	244071/78933/14595/192197/12190/12345/73420/214444/103268/70737/76707/70762/239667/330938/13430/103967/12934/13518/13426/13548/68519/78798/14260/14272/14360/14683/76478/320191/16553/16558/16564/269152/75050/16572/319991/66725/17096/17756/17760/17762/232944/77521/260315/52589/74143/69310/18578/56273/19017/52055/28193/73094/20866/20257/21844/74410/320244/70892/22253/56491	60
GO:0098918	MF	GO:0098918	structural constituent of synapse	13/1802	30/22682	1.59157e-07	5.49916e-06	4.47142e-06	12217/13383/23859/224997/103967/111173/238988/26556/50791/327814/116837/116838/210274	13
GO:0005244	MF	GO:0005244	voltage-gated ion channel activity	37/1802	188/22682	2.21759e-07	7.16784e-06	5.82825e-06	101772/320508/12286/12288/12289/12290/12294/12298/12300/54377/76856/111173/14811/14812/242443/108073/15165/16497/240444/16510/170738/70357/80334/16519/16522/217826/16526/16531/16535/226922/240776/16532/338370/20190/110880/20273/13409	37
GO:0022832	MF	GO:0022832	voltage-gated channel activity	37/1802	188/22682	2.21759e-07	7.16784e-06	5.82825e-06	101772/320508/12286/12288/12289/12290/12294/12298/12300/54377/76856/111173/14811/14812/242443/108073/15165/16497/240444/16510/170738/70357/80334/16519/16522/217826/16526/16531/16535/226922/240776/16532/338370/20190/110880/20273/13409	37
GO:0004970	MF	GO:0004970	ionotropic glutamate receptor activity	10/1802	18/22682	2.36211e-07	7.39635e-06	6.01405e-06	14799/14802/14803/14804/14805/14807/110637/14811/14812/242443	10
GO:0071889	MF	GO:0071889	14-3-3 protein binding	13/1802	31/22682	2.54153e-07	7.717e-06	6.27478e-06	69601/17425/16510/16706/18004/18754/18762/74370/20817/118449/223754/381085/319880	13
GO:0008081	MF	GO:0008081	phosphoric diester hydrolase activity	22/1802	83/22682	3.38326e-07	9.97067e-06	8.10726e-06	18605/233537/14682/14683/23984/18573/18575/54611/18576/18578/238871/242202/29863/218461/18585/18795/18798/74055/234779/227120/224860/18805	22
GO:0015276	MF	GO:0015276	ligand-gated ion channel activity	29/1802	132/22682	4.08428e-07	1.16927e-05	9.50748e-06	11418/241118/12638/30952/14402/14407/14657/14658/14799/14802/14803/14804/14805/14807/110637/14811/14812/242443/15165/16438/16439/170738/16519/16522/16531/171166/20190/20191/20192	29
GO:0022834	MF	GO:0022834	ligand-gated channel activity	29/1802	135/22682	6.71832e-07	1.85299e-05	1.50669e-05	11418/241118/12638/30952/14402/14407/14657/14658/14799/14802/14803/14804/14805/14807/110637/14811/14812/242443/15165/16438/16439/170738/16519/16522/16531/171166/20190/20191/20192	29
GO:0051018	MF	GO:0051018	protein kinase A binding	17/1802	55/22682	6.84238e-07	1.85299e-05	1.50669e-05	238161/432442/100986/99371/14799/56637/16535/80877/66725/245049/26422/677884/19085/19088/73137/20191/245880	17
GO:0004114	MF	GO:0004114	3',5'-cyclic-nucleotide phosphodiesterase activity	11/1802	24/22682	7.29177e-07	1.90253e-05	1.54696e-05	23984/18573/18575/54611/18576/18578/238871/242202/29863/218461/18585	11
GO:0016247	MF	GO:0016247	channel regulator activity	30/1802	143/22682	7.40504e-07	1.90253e-05	1.54696e-05	100986/109676/381290/12300/54377/12638/13383/269109/13483/14167/14169/108073/16438/16497/70357/80334/16526/83814/18125/18189/18190/18191/18751/18762/19091/545622/170755/20866/116873/55943	30
GO:0008569	MF	GO:0008569	ATP-dependent microtubule motor activity, minus-end-directed	10/1802	20/22682	8.59872e-07	2.15398e-05	1.75142e-05	56087/13411/110083/240960/330355/227058/100101919/13417/237806/110350	10
GO:0051020	MF	GO:0051020	GTPase binding	50/1802	307/22682	9.11084e-07	2.2266e-05	1.81047e-05	78618/12306/54126/217866/227801/320127/13367/56419/238130/67299/105445/111173/20336/320051/223254/14158/14799/209462/230673/29875/544963/16558/66725/194401/17919/245049/56349/74055/243725/243819/18755/19275/268451/52055/19349/29809/56508/192786/19417/240168/116837/116838/217835/20660/117600/14270/83672/238799/109181/98910	50
GO:0022843	MF	GO:0022843	voltage-gated cation channel activity	29/1802	138/22682	1.08539e-06	2.58944e-05	2.1055e-05	320508/12286/12288/12289/12290/12294/12298/12300/54377/76856/111173/14811/14812/242443/108073/15165/16497/240444/16510/170738/16519/16522/16526/16531/16535/226922/240776/20190/13409	29
GO:0004653	MF	GO:0004653	polypeptide N-acetylgalactosaminyltransferase activity	9/1802	17/22682	1.66965e-06	3.89068e-05	3.16355e-05	231050/271786/71685/233733/108148/241391/207839/108150/270049	9
GO:0004112	MF	GO:0004112	cyclic-nucleotide phosphodiesterase activity	11/1802	26/22682	1.94415e-06	4.42736e-05	3.59993e-05	23984/18573/18575/54611/18576/18578/238871/242202/29863/218461/18585	11
GO:0099106	MF	GO:0099106	ion channel regulator activity	24/1802	110/22682	4.50532e-06	9.92228e-05	8.06791e-05	100986/109676/54377/12638/13383/269109/13483/108073/16438/16497/70357/80334/16526/83814/18189/18190/18191/18751/18762/19091/170755/20866/116873/55943	24
GO:0051015	MF	GO:0051015	actin filament binding	37/1802	212/22682	4.55514e-06	9.92228e-05	8.06791e-05	226251/60595/242894/69538/12345/235431/12386/216033/54366/13629/225288/29875/544963/71960/244281/338367/71602/667663/17919/208943/17922/242702/74103/18175/102502/243725/19201/110380/27428/208431/217692/64009/70549/21916/22157/22288/241431	37
GO:0003777	MF	GO:0003777	microtubule motor activity	18/1802	70/22682	6.20004e-06	0.000132179	0.000107477	56087/13411/110083/240960/330355/227058/100101919/13417/237806/13426/110350/16553/16558/16564/269152/75050/16572/319991	18
GO:0045505	MF	GO:0045505	dynein intermediate chain binding	12/1802	35/22682	9.02942e-06	0.000188489	0.000153263	56087/13411/110083/240960/330355/227058/100101919/13417/237806/110350/67068/320191	12
GO:0005245	MF	GO:0005245	voltage-gated calcium channel activity	14/1802	47/22682	1.0587e-05	0.000216493	0.000176033	320508/12286/12288/12289/12290/12294/12298/12300/54377/76856/111173/108073/20190/13409	14
GO:1901981	MF	GO:1901981	phosphatidylinositol phosphate binding	32/1802	180/22682	1.32786e-05	0.000265493	0.000215875	78618/12306/319924/69710/212285/13196/329015/27062/74438/215890/13132/69601/26377/227801/333605/14389/15165/29875/544963/16510/16535/16558/17972/380698/237542/93742/18795/100502698/69226/60510/22157/218441	32
GO:0035254	MF	GO:0035254	glutamate receptor binding	17/1802	67/22682	1.35131e-05	0.000265493	0.000215875	11941/12300/54377/13383/103967/13982/14360/14683/14799/14811/14812/56637/26556/17919/19417/210274/380702	17
GO:0051959	MF	GO:0051959	dynein light intermediate chain binding	11/1802	31/22682	1.46848e-05	0.000282965	0.000230082	56087/13411/110083/240960/330355/227058/100101919/13417/237806/110350/320191	11
GO:1990939	MF	GO:1990939	ATP-dependent microtubule motor activity	12/1802	37/22682	1.72606e-05	0.000326323	0.000265336	56087/13411/110083/240960/330355/227058/100101919/13417/237806/110350/16558/16572	12
GO:0016791	MF	GO:0016791	phosphatase activity	42/1802	271/22682	2.26818e-05	0.000420874	0.000342217	66408/240672/13853/14048/14049/103199/269180/234515/212111/76429/14245/74249/66725/17330/74302/18639/98432/19012/381925/272031/18979/74776/320472/319468/242083/19248/19250/545622/19258/19263/19266/19270/19274/19275/19276/19277/19279/19281/19273/235534/24018/104015	42
GO:0004713	MF	GO:0004713	protein tyrosine kinase activity	25/1802	130/22682	2.92724e-05	0.00053329	0.000433624	11682/213452/13548/13840/270190/13844/13869/14158/14183/14254/14360/16001/17096/23938/26399/17279/18004/100042150/18212/18213/244895/26563/26564/19886/22612	25
GO:0099094	MF	GO:0099094	ligand-gated cation channel activity	21/1802	100/22682	3.21061e-05	0.00057447	0.000467107	11418/241118/30952/14799/14802/14805/14807/110637/14811/14812/242443/15165/16438/16439/170738/16519/16522/171166/20190/20191/20192	21
GO:0008046	MF	GO:0008046	axon guidance receptor activity	6/1802	10/22682	3.95808e-05	0.000695788	0.000565753	270190/13844/72333/19876/268902/20356	6
GO:0019902	MF	GO:0019902	phosphatase binding	36/1802	225/22682	4.28872e-05	0.000740913	0.000602444	238161/11733/381290/104248/12288/12558/69601/13383/23859/14158/14389/242443/29875/16438/16535/16579/50791/17762/74302/244281/17967/18019/93742/18613/218194/19013/228852/243725/243819/71474/19281/19886/319934/78473/80297/56480	36
GO:0005201	MF	GO:0005201	extracellular matrix structural constituent	27/1802	150/22682	4.86502e-05	0.000826229	0.000671816	12816/12818/12819/12822/12823/237759/77018/213945/12827/12829/94216/140703/14118/231470/545370/665700/16772/16774/268977/17181/18073/18074/116847/19699/20563/233744/22371	27
GO:0098631	MF	GO:0098631	cell adhesion mediator activity	12/1802	41/22682	5.45968e-05	0.000911767	0.000741367	14595/12565/244682/53870/13508/114873/319480/16398/83964/241568/319504/80883	12
GO:0060090	MF	GO:0060090	molecular adaptor activity	48/1802	337/22682	5.72958e-05	0.000941155	0.000765263	11308/238161/100986/11733/109676/11735/338349/13132/69601/244667/13383/224997/244310/13823/50754/209630/14389/268566/74053/26556/29875/16443/16706/333050/66725/14924/50791/99470/17972/83679/59020/93834/235542/108079/74370/70097/59009/210274/20411/70834/74646/108800/20908/55943/64009/118449/53611/52357	48
GO:0005547	MF	GO:0005547	phosphatidylinositol-3,4,5-trisphosphate binding	12/1802	42/22682	7.09451e-05	0.00114656	0.000932284	69710/212285/13196/26377/14389/15165/29875/544963/16558/380698/93742/218441	12
GO:0016887	MF	GO:0016887	ATPase activity	60/1802	456/22682	7.76773e-05	0.00123544	0.00100455	268379/233810/381072/11304/56199/18671/244562/20927/14081/117147/54343/319767/224079/11941/11980/50769/11981/50771/207165/237911/12638/107932/109151/67848/230073/56087/13411/110083/240960/330355/227058/100101919/13417/237806/110350/78455/15925/16553/16558/16564/75050/16572/319991/83456/17686/71960/338367/71602/667663/17919/208943/17922/78286/19363/19691/56505/54380/74355/21355/219189	60
GO:0008013	MF	GO:0008013	beta-catenin binding	19/1802	92/22682	9.5164e-05	0.00148991	0.00121146	230959/12558/381409/12386/216033/18163/13982/14812/56637/329650/19281/19273/19883/110380/74392/24069/21413/21415/22066	19
GO:0022824	MF	GO:0022824	transmitter-gated ion channel activity	14/1802	57/22682	0.000112253	0.0017042	0.00138571	14402/14407/14657/14658/14799/14802/14803/14804/14805/14807/110637/14811/14812/242443	14
GO:0022835	MF	GO:0022835	transmitter-gated channel activity	14/1802	57/22682	0.000112253	0.0017042	0.00138571	14402/14407/14657/14658/14799/14802/14803/14804/14805/14807/110637/14811/14812/242443	14
GO:0008376	MF	GO:0008376	acetylgalactosaminyltransferase activity	12/1802	45/22682	0.000147582	0.00220712	0.00179463	26877/93961/234356/231050/271786/71685/233733/108148/241391/207839/108150/270049	12
GO:0004115	MF	GO:0004115	3',5'-cyclic-AMP phosphodiesterase activity	6/1802	12/22682	0.000151462	0.00223184	0.00181473	54611/18576/18578/238871/29863/218461	6
GO:1904315	MF	GO:1904315	transmitter-gated ion channel activity involved in regulation of postsynaptic membrane potential	13/1802	52/22682	0.000161417	0.00234405	0.00190598	14402/14407/14658/14799/14802/14803/14804/14805/14807/110637/14811/14812/242443	13
GO:0019903	MF	GO:0019903	protein phosphatase binding	29/1802	178/22682	0.000165616	0.00235601	0.0019157	238161/11733/381290/104248/12288/12558/69601/23859/14158/14389/242443/29875/16438/16535/16579/17762/74302/244281/93742/18613/218194/228852/243725/243819/71474/19281/19886/78473/56480	29
GO:0004714	MF	GO:0004714	transmembrane receptor protein tyrosine kinase activity	14/1802	59/22682	0.000166943	0.00235601	0.0019157	11682/13840/270190/13844/13869/14183/14254/16001/100042150/18212/18213/26563/26564/19886	14
GO:0005267	MF	GO:0005267	potassium channel activity	22/1802	120/22682	0.000178373	0.00248235	0.00201843	20927/14805/14807/110637/15165/16497/240444/16510/170738/70357/80334/16519/16522/72258/217826/16526/16531/140492/16535/226922/240776/16532	22
GO:1990782	MF	GO:1990782	protein tyrosine kinase binding	20/1802	105/22682	0.000202713	0.00278244	0.00226243	11600/242248/12503/238130/13508/14272/14389/404194/108071/16180/26409/18003/50490/211323/18212/19250/19417/20418/271849/21844	20
GO:0005217	MF	GO:0005217	intracellular ligand-gated ion channel activity	9/1802	28/22682	0.000212415	0.00287622	0.00233868	12638/30952/15165/16438/16439/171166/20190/20191/20192	9
GO:0017022	MF	GO:0017022	myosin binding	16/1802	75/22682	0.000223394	0.00298455	0.00242677	110789/99371/13405/14799/77569/231876/245049/54631/80718/67295/270192/208431/78808/207227/67095/22283	16
GO:0004725	MF	GO:0004725	protein tyrosine phosphatase activity	19/1802	98/22682	0.00022803	0.00300639	0.00244453	240672/13853/14048/14049/74302/19248/19250/545622/19258/19263/19266/19270/19274/19276/19277/19279/19281/19273/24018	19
GO:0015079	MF	GO:0015079	potassium ion transmembrane transporter activity	26/1802	156/22682	0.000243481	0.00316841	0.00257627	20927/14805/14807/110637/15165/16497/240444/16510/170738/70357/80334/16519/16522/72258/217826/16526/16531/140492/16535/226922/240776/16532/20495/94249/226999/236727	26
GO:0098960	MF	GO:0098960	postsynaptic neurotransmitter receptor activity	15/1802	69/22682	0.000279644	0.00359235	0.00292098	14402/14407/14658/14799/14802/14803/14804/14805/14807/110637/14811/14812/242443/14816/108071	15
GO:0045499	MF	GO:0045499	chemorepellent activity	9/1802	29/22682	0.000286422	0.00363285	0.00295391	13640/211323/18183/20346/108151/20356/20357/214968/20563	9
GO:0099529	MF	GO:0099529	neurotransmitter receptor activity involved in regulation of postsynaptic membrane potential	13/1802	55/22682	0.00029484	0.00369287	0.00300271	14402/14407/14658/14799/14802/14803/14804/14805/14807/110637/14811/14812/242443	13
GO:0015459	MF	GO:0015459	potassium channel regulator activity	12/1802	49/22682	0.000351748	0.00435126	0.00353805	100986/109676/13383/269109/13483/16497/70357/80334/16526/83814/18762/170755	12
GO:0030551	MF	GO:0030551	cyclic nucleotide binding	10/1802	36/22682	0.000364055	0.00444857	0.00361718	30952/15165/23984/18575/18578/242202/19085/19088/19091/56508	10
GO:0004721	MF	GO:0004721	phosphoprotein phosphatase activity	27/1802	171/22682	0.000456247	0.00550795	0.00447857	240672/13853/14048/14049/76429/74249/66725/74302/98432/74776/320472/319468/242083/19248/19250/545622/19258/19263/19266/19270/19274/19276/19277/19279/19281/19273/24018	27
GO:0099604	MF	GO:0099604	ligand-gated calcium channel activity	8/1802	25/22682	0.000494683	0.00587889	0.00478019	14811/14812/16438/16439/171166/20190/20191/20192	8
GO:0098632	MF	GO:0098632	cell-cell adhesion mediator activity	9/1802	31/22682	0.000498709	0.00587889	0.00478019	12565/244682/53870/13508/114873/83964/241568/319504/80883	9
GO:0035591	MF	GO:0035591	signaling adaptor activity	13/1802	58/22682	0.000512642	0.00597288	0.00485661	11308/69601/14389/74053/29875/16706/333050/66725/50791/59009/210274/20411/70834	13
GO:0098879	MF	GO:0098879	structural constituent of postsynaptic specialization	5/1802	10/22682	0.000564697	0.00650375	0.00528827	13383/23859/224997/50791/210274	5
GO:0030020	MF	GO:0030020	extracellular matrix structural constituent conferring tensile strength	10/1802	38/22682	0.000584946	0.00666041	0.00541565	12816/12818/12819/12822/237759/77018/213945/12827/12829/94216	10
GO:0099186	MF	GO:0099186	structural constituent of postsynapse	7/1802	20/22682	0.000606756	0.00676349	0.00549946	13383/23859/224997/103967/26556/50791/210274	7
GO:0008017	MF	GO:0008017	microtubule binding	37/1802	266/22682	0.000607499	0.00676349	0.00549946	73420/214444/103268/70737/76707/70762/13430/103967/12934/13518/13426/68519/78798/14260/14272/76478/320191/16553/16558/16564/269152/75050/16572/319991/17756/17760/17762/232944/77521/260315/74143/56273/28193/73094/20866/21844/56491	37
GO:0030674	MF	GO:0030674	protein-macromolecule adaptor activity	34/1802	239/22682	0.000661935	0.00716642	0.00582709	11308/238161/11733/109676/11735/338349/13132/69601/13823/50754/209630/14389/74053/29875/16706/333050/66725/50791/59020/93834/235542/108079/74370/59009/210274/20411/70834/74646/108800/20908/55943/64009/118449/53611	34
GO:0000146	MF	GO:0000146	microfilament motor activity	8/1802	26/22682	0.000665146	0.00716642	0.00582709	71960/338367/71602/667663/329421/17919/208943/17922	8
GO:0034237	MF	GO:0034237	protein kinase A regulatory subunit binding	8/1802	26/22682	0.000665146	0.00716642	0.00582709	238161/432442/100986/99371/16535/73137/20191/245880	8
GO:0030552	MF	GO:0030552	cAMP binding	7/1802	21/22682	0.000848106	0.00904045	0.00735088	15165/23984/18575/18578/19085/19088/56508	7
GO:0005230	MF	GO:0005230	extracellular ligand-gated ion channel activity	14/1802	69/22682	0.000917926	0.0096817	0.0078723	14402/14407/14657/14658/14799/14802/14803/14804/14805/14807/110637/14811/14812/242443	14
GO:0015278	MF	GO:0015278	calcium-release channel activity	6/1802	16/22682	0.000994256	0.0103775	0.00843809	16438/16439/171166/20190/20191/20192	6
GO:0001965	MF	GO:0001965	G-protein alpha-subunit binding	10/1802	41/22682	0.0011145	0.0113952	0.00926559	110789/14683/67839/14799/16001/16522/76645/626596/24012/70097	10
GO:0005246	MF	GO:0005246	calcium channel regulator activity	10/1802	41/22682	0.0011145	0.0113952	0.00926559	54377/108073/16438/18189/18190/18191/18751/19091/20866/116873	10
GO:0043014	MF	GO:0043014	alpha-tubulin binding	10/1802	42/22682	0.00136004	0.0137652	0.0111927	14595/239667/78798/14272/14360/14683/52589/69310/19017/70892	10
GO:0051393	MF	GO:0051393	alpha-actinin binding	8/1802	29/22682	0.00147477	0.0147772	0.0120155	12288/12289/14924/54631/18175/19281/118449/241431	8
GO:0016757	MF	GO:0016757	transferase activity, transferring glycosyl groups	36/1802	270/22682	0.00153639	0.0149639	0.0121673	333424/26877/93961/381694/14595/234356/53618/14348/231050/271786/71685/233733/108148/241391/207839/108150/270049/74185/67569/107895/101187/20441/20447/26938/20449/241230/387314/278279/74493/394430/394435/394432/394434/76654/268880/233781	36
GO:0004016	MF	GO:0004016	adenylate cyclase activity	5/1802	12/22682	0.00155057	0.0149639	0.0121673	271639/210044/104111/11513/11515	5
GO:0005078	MF	GO:0005078	MAP-kinase scaffold activity	5/1802	12/22682	0.00155057	0.0149639	0.0121673	29875/16706/333050/59009/70834	5
GO:0030898	MF	GO:0030898	actin-dependent ATPase activity	7/1802	23/22682	0.00155314	0.0149639	0.0121673	71960/338367/71602/667663/17919/208943/17922	7
GO:0008194	MF	GO:0008194	UDP-glycosyltransferase activity	23/1802	149/22682	0.00158181	0.015095	0.0122739	333424/26877/93961/381694/14595/234356/231050/271786/71685/233733/108148/241391/207839/108150/270049/67569/107895/394430/394435/394432/394434/268880/233781	23
GO:0043015	MF	GO:0043015	gamma-tubulin binding	8/1802	30/22682	0.00187268	0.0177021	0.0143938	12190/214444/103268/330938/17096/232944/18578/52055	8
GO:0004435	MF	GO:0004435	phosphatidylinositol phospholipase C activity	6/1802	18/22682	0.00200739	0.0186241	0.0151434	18795/18798/74055/234779/227120/224860	6
GO:0004629	MF	GO:0004629	phospholipase C activity	6/1802	18/22682	0.00200739	0.0186241	0.0151434	18795/18798/74055/234779/227120/224860	6
GO:0017166	MF	GO:0017166	vinculin binding	5/1802	13/22682	0.0023557	0.021265	0.0172908	235431/50768/13405/18175/22288	5
GO:0099511	MF	GO:0099511	voltage-gated calcium channel activity involved in regulation of cytosolic calcium levels	5/1802	13/22682	0.0023557	0.021265	0.0172908	12286/12289/12290/12298/111173	5
GO:0099626	MF	GO:0099626	voltage-gated calcium channel activity involved in regulation of presynaptic cytosolic calcium levels	5/1802	13/22682	0.0023557	0.021265	0.0172908	12286/12289/12290/12298/111173	5
GO:0019199	MF	GO:0019199	transmembrane receptor protein kinase activity	14/1802	77/22682	0.00274831	0.0245876	0.0199924	11682/13840/270190/13844/13869/14183/14254/16001/100042150/18212/18213/26563/26564/19886	14
GO:0035255	MF	GO:0035255	ionotropic glutamate receptor binding	9/1802	39/22682	0.00294308	0.026097	0.0212198	12300/54377/13383/14683/14812/56637/17919/210274/380702	9
GO:0019208	MF	GO:0019208	phosphatase regulator activity	15/1802	87/22682	0.00337156	0.0292171	0.0237567	104248/231876/107895/218194/329251/76142/228852/72930/269643/235542/26932/243819/71474/53901/319934	15
GO:0008191	MF	GO:0008191	metalloendopeptidase inhibitor activity	5/1802	14/22682	0.00342647	0.0292171	0.0237567	59083/20745/72902/21858/278507	5
GO:0016594	MF	GO:0016594	glycine binding	5/1802	14/22682	0.00342647	0.0292171	0.0237567	230967/14657/14658/14812/242443	5
GO:0016595	MF	GO:0016595	glutamate binding	5/1802	14/22682	0.00342647	0.0292171	0.0237567	230967/14805/14811/14812/108073	5
GO:1902936	MF	GO:1902936	phosphatidylinositol bisphosphate binding	18/1802	113/22682	0.00344073	0.0292171	0.0237567	78618/12306/319924/13196/27062/74438/215890/13132/333605/15165/16510/16535/16558/380698/93742/18795/60510/22157	18
GO:0042805	MF	GO:0042805	actinin binding	9/1802	40/22682	0.00353438	0.02976	0.0241982	12288/12289/13007/14924/54631/18175/19281/118449/241431	9
GO:0035259	MF	GO:0035259	glucocorticoid receptor binding	6/1802	20/22682	0.00365212	0.0304952	0.024796	23872/74053/230673/17978/20602/320165	6
GO:0001540	MF	GO:0001540	amyloid-beta binding	12/1802	64/22682	0.00413927	0.0342772	0.0278712	319924/11784/11787/225372/12491/77018/13844/14799/15925/16398/241576/20660	12
GO:0140326	MF	GO:0140326	ATPase-coupled intramembrane lipid transporter activity	7/1802	27/22682	0.00424992	0.0349051	0.0283817	11304/18671/319767/11980/50769/11981/50771	7
GO:0016758	MF	GO:0016758	transferase activity, transferring hexosyl groups	27/1802	199/22682	0.0043827	0.035703	0.0290305	333424/26877/93961/381694/14595/234356/53618/14348/231050/271786/71685/233733/108148/241391/207839/108150/270049/74185/67569/107895/387314/278279/394430/394435/394432/394434/233781	27
GO:0030971	MF	GO:0030971	receptor tyrosine kinase binding	13/1802	73/22682	0.00461059	0.0364873	0.0296682	11600/238130/14272/14389/404194/26409/211323/18212/19250/19417/20418/271849/21844	13
GO:0097110	MF	GO:0097110	scaffold protein binding	13/1802	73/22682	0.00461059	0.0364873	0.0296682	381290/14799/14804/14811/14812/26556/16439/16535/16572/26409/192167/18125/20191	13
GO:0043395	MF	GO:0043395	heparan sulfate proteoglycan binding	6/1802	21/22682	0.00477373	0.0364873	0.0296682	70370/545291/15450/243499/20356/20563	6
GO:0003951	MF	GO:0003951	NAD+ kinase activity	5/1802	15/22682	0.00480671	0.0364873	0.0296682	217480/110197/380921/320127/68646	5
GO:0004697	MF	GO:0004697	protein kinase C activity	5/1802	15/22682	0.00480671	0.0364873	0.0296682	18750/18751/18754/18755/18762	5
GO:0034236	MF	GO:0034236	protein kinase A catalytic subunit binding	5/1802	15/22682	0.00480671	0.0364873	0.0296682	56637/16535/19085/19088/20191	5
GO:0034483	MF	GO:0034483	heparan sulfate sulfotransferase activity	5/1802	15/22682	0.00480671	0.0364873	0.0296682	195646/628779/319415/50787/83398	5
GO:0047555	MF	GO:0047555	3',5'-cyclic-GMP phosphodiesterase activity	5/1802	15/22682	0.00480671	0.0364873	0.0296682	23984/18573/18575/242202/18585	5
GO:0070679	MF	GO:0070679	inositol 1,4,5 trisphosphate binding	5/1802	15/22682	0.00480671	0.0364873	0.0296682	16438/16439/224860/22066/26946	5
GO:0019888	MF	GO:0019888	protein phosphatase regulator activity	13/1802	74/22682	0.00519573	0.0391438	0.0318282	104248/231876/107895/218194/76142/228852/72930/269643/235542/26932/243819/71474/53901	13
GO:0030374	MF	GO:0030374	nuclear receptor coactivator activity	10/1802	50/22682	0.00531511	0.0397443	0.0323165	60595/74106/17978/19017/170826/18751/66993/268996/320165/328365	10
GO:0008331	MF	GO:0008331	high voltage-gated calcium channel activity	4/1802	10/22682	0.00564525	0.0415922	0.033819	12286/12288/12289/12298	4
GO:0045159	MF	GO:0045159	myosin II binding	4/1802	10/22682	0.00564525	0.0415922	0.033819	77569/208431/78808/207227	4
GO:0005272	MF	GO:0005272	sodium channel activity	9/1802	43/22682	0.00587923	0.0429999	0.0349637	11418/241118/14805/14807/110637/15165/338370/110880/20273	9
GO:0030594	MF	GO:0030594	neurotransmitter receptor activity	17/1802	110/22682	0.0059966	0.0435405	0.0354033	14402/14407/14657/14658/14799/14802/14803/14804/14805/14807/110637/14811/14812/242443/14816/108071/15557	17
GO:0050998	MF	GO:0050998	nitric-oxide synthase binding	6/1802	22/22682	0.00612916	0.0441829	0.0359256	381290/12558/13405/13430/103967/70729	6
GO:0015081	MF	GO:0015081	sodium ion transmembrane transporter activity	21/1802	148/22682	0.00671656	0.0480714	0.0390874	11418/241118/14805/14807/110637/15165/338370/110880/20273/20495/114644/20519/94249/94229/54403/232156/229706/104245/20541/226999/236727	21
GO:0005319	MF	GO:0005319	lipid transporter activity	23/1802	167/22682	0.00677647	0.0481562	0.0391563	268379/233810/381072/11304/18671/320091/319767/11980/50769/11981/50771/12491/14805/74309/74486/71720/237542/100273/71795/76775/114644/78830/28250	23
GO:0008237	MF	GO:0008237	metallopeptidase activity	25/1802	187/22682	0.0071707	0.0505989	0.0411425	11489/11492/23792/353188/11499/239337/216725/223838/108154/77739/244071/78933/16790/338403/329093/54381/15925/240028/230598/18491/23850/18624/73078/24087/237553	25
GO:0004143	MF	GO:0004143	diacylglycerol kinase activity	4/1802	11/22682	0.00831818	0.0578807	0.0470634	217480/110197/380921/320127	4
GO:0035612	MF	GO:0035612	AP-2 adaptor complex binding	4/1802	11/22682	0.00831818	0.0578807	0.0470634	269774/13132/14402/72238	4
GO:0140327	MF	GO:0140327	flippase activity	5/1802	17/22682	0.00866704	0.0598923	0.048699	11304/18671/319767/11980/50769	5
GO:0140303	MF	GO:0140303	intramembrane lipid transporter activity	8/1802	38/22682	0.00887524	0.0609109	0.0495273	11304/18671/320091/319767/11980/50769/11981/50771	8

## Sheet: Table S7
Supplementary Table S7 Gene Ontology enrichment analysis of 226 mutual H3K27ac peak binding genes for BaP-NTD and BaP-nonNTD.
Term	Ontology	ID	Description	Gene ratio	Bg ratio	P-value	Adjusted P-value	A-value	Gene ID	Count
GO:0050808	BP	GO:0050808	synapse organization	74/1145	486/23355	2.97e-18	1.44e-14	1.23e-14	210933/319387/11418/11941/12286/64085/244682/18163/30785/217480/244667/103967/13640/270190/13844/13869/238988/223254/70598/396184/14360/14402/14658/23888/268566/14804/14811/108071/230868/16180/331461/545156/67703/242384/70530/241568/66725/50791/320772/77579/17919/320840/18027/192167/211323/100042150/18189/18191/18212/74143/68507/67533/243725/18750/56508/19699/242662/330222/237979/56747/210274/380…	74
GO:0007626	BP	GO:0007626	locomotory behavior	48/1145	263/23355	2.45e-15	5.92e-12	5.08e-12	76192/319387/67269/11682/382543/11784/11941/20238/100568459/224671/12286/12288/12290/12614/12661/13131/13508/15572/14167/14169/14658/14708/14811/108071/15932/545156/16508/16847/66725/268890/26414/171166/78286/17978/320840/27386/211323/18203/11994/18754/19699/20273/56747/94229/214585/21916/21960/11906	48
GO:0034329	BP	GO:0034329	cell junction assembly	61/1145	432/23355	9.56e-14	1.25e-10	1.08e-10	210933/319387/11418/12286/215654/104010/12563/58187/56173/74987/64085/244682/235431/18163/13383/103967/13518/13640/13823/270190/13844/13869/223254/396184/14402/23888/14804/16180/331461/29875/83964/67703/16774/77569/242384/50791/26921/320772/83814/320840/192167/211323/100042150/18189/18191/18212/93742/18613/227937/243725/18750/107746/19699/330222/237979/210274/217692/20411/29819/77057/21872	61
GO:0098742	BP	GO:0098742	cell-cell adhesion via plasma-membrane adhesion molecules	40/1145	209/23355	1.04e-13	1.25e-10	1.08e-10	319387/215654/12554/12555/104010/12561/12563/12614/64085/244682/53870/170788/13131/13508/114873/13640/270120/23888/14804/230868/16180/331461/67703/241568/50791/23938/320772/192167/18189/11994/18613/19274/19281/268902/330222/237979/13602/23963/23964/23966	40
GO:0007264	BP	GO:0007264	small GTPase mediated signal transduction	61/1145	439/23355	1.97e-13	1.91e-10	1.64e-10	109934/99371/215821/73910/231532/71302/268970/545481/71544/234094/72754/110596/381112/319974/12053/12554/12614/13131/320127/13430/330662/94176/208869/238130/68813/105445/140580/13844/223254/20403/545156/16706/333050/26921/56349/18053/211323/18613/74055/241694/107746/56508/217944/19699/19731/69288/104215/66922/20163/217692/244668/74206/20662/20663/219140/117600/21844/24001/21858/223435/22084	61
GO:0007416	BP	GO:0007416	synapse assembly	37/1145	193/23355	8.25e-13	4.99e-10	4.28e-10	210933/319387/11418/12286/64085/244682/103967/13640/270190/13844/13869/223254/396184/14402/23888/14804/16180/331461/67703/242384/50791/320772/320840/192167/211323/100042150/18189/18191/18212/243725/18750/19699/330222/237979/210274/217692/29819	37
GO:0050803	BP	GO:0050803	regulation of synapse structure or activity	45/1145	273/23355	7.95e-13	4.99e-10	4.28e-10	210933/319387/11418/64085/30785/217480/244667/13430/103967/13640/270190/13844/223254/396184/14360/23888/14804/16180/331461/545156/242384/70530/66725/50791/320772/77579/17919/320840/192167/100042150/18189/18212/74143/243725/18750/56508/19699/242662/210274/217692/13602/29819/66860/21844/22084	45
GO:0050807	BP	GO:0050807	regulation of synapse organization	44/1145	261/23355	6.43e-13	4.99e-10	4.28e-10	210933/319387/11418/64085/30785/217480/244667/103967/13640/270190/13844/223254/396184/14360/23888/14804/16180/331461/545156/242384/70530/66725/50791/320772/77579/17919/320840/192167/100042150/18189/18212/74143/243725/18750/56508/19699/242662/210274/217692/13602/29819/66860/21844/22084	44
GO:0007409	BP	GO:0007409	axonogenesis	60/1145	483/23355	3.7e-11	1.99e-08	1.71e-08	110532/110596/50769/319974/12286/12561/213084/12661/269784/244682/53870/12808/13131/13176/13175/239667/244667/13430/12934/13508/114873/13518/13640/13840/270190/13844/545156/16772/16773/16774/231876/14725/241568/77579/17919/18053/211323/18212/18261/18845/243743/54712/18750/19274/19699/268902/217692/20564/319757/214585/78808/230676/23964/21844/24001/21960/22084/76260/338362/67263	60
GO:0016358	BP	GO:0016358	dendrite development	45/1145	309/23355	6.09e-11	2.95e-08	2.53e-08	210933/11682/239985/12286/227541/213084/12808/18163/13131/13175/110197/244667/103967/13508/15572/270190/13844/223254/270120/396184/14360/74053/16180/331461/29875/545156/66725/17919/83814/18053/192167/211323/18212/74143/218194/243725/56508/19699/330222/210274/217692/29819/21844/665113/22084	45
GO:0051056	BP	GO:0051056	regulation of small GTPase mediated signal transduction	41/1145	273/23355	1.65e-10	7.27e-08	6.25e-08	109934/99371/215821/73910/231532/71302/268970/545481/71544/234094/72754/110596/381112/319974/12053/320127/13430/94176/13844/223254/20403/545156/26921/56349/18053/211323/74055/241694/107746/19699/217692/244668/74206/20662/20663/219140/21844/24001/21858/223435/22084	41
GO:0032412	BP	GO:0032412	regulation of ion transmembrane transporter activity	40/1145	265/23355	2.36e-10	9.53e-08	8.18e-08	18671/238161/100986/109676/11418/12286/12289/12638/69635/13383/13405/13430/26903/13844/14167/14169/14811/108071/269994/14873/15165/15275/16497/16535/83814/192167/70729/18189/233571/18578/238871/59020/18795/234779/19017/18750/19699/20191/210274/380702	40
GO:0099173	BP	GO:0099173	postsynapse organization	34/1145	203/23355	3.21e-10	1.19e-07	1.03e-07	18163/217480/103967/270190/13844/223254/14360/14658/268566/14804/14811/16180/331461/545156/70530/66725/50791/77579/17919/192167/18189/74143/243725/56508/19699/210274/380702/217692/20411/29819/66860/21844/81907/22084	34
GO:0031346	BP	GO:0031346	positive regulation of cell projection organization	54/1145	436/23355	3.98e-10	1.37e-07	1.18e-07	11682/11881/50769/319974/227541/12561/213084/12805/12808/13176/244667/13405/13430/103967/22240/13508/13640/15572/14348/14360/74053/16180/331461/29875/545156/50791/667663/329421/17919/320840/18053/192167/211323/18212/18261/74143/74055/75769/18845/243743/54712/243725/235442/107746/19699/104215/268902/26564/20317/29819/23963/21844/24001/22084	54
GO:0022898	BP	GO:0022898	regulation of transmembrane transporter activity	40/1145	276/23355	8.14e-10	2.46e-07	2.11e-07	18671/238161/100986/109676/11418/12286/12289/12638/69635/13383/13405/13430/26903/13844/14167/14169/14811/108071/269994/14873/15165/15275/16497/16535/83814/192167/70729/18189/233571/18578/238871/59020/18795/234779/19017/18750/19699/20191/210274/380702	40
GO:0032409	BP	GO:0032409	regulation of transporter activity	41/1145	287/23355	7.79e-10	2.46e-07	2.11e-07	18671/238161/100986/109676/11418/12286/12289/12638/69635/13383/13405/13430/26903/13844/14167/14169/14811/108071/269994/14873/15165/15275/16497/16535/76273/83814/192167/70729/18189/233571/18578/238871/59020/18795/234779/19017/18750/19699/20191/210274/380702	41
GO:0042391	BP	GO:0042391	regulation of membrane potential	54/1145	451/23355	1.37e-09	3.89e-07	3.34e-07	238161/100986/109676/101772/11418/20238/12286/12288/12289/12638/216033/320127/13383/13405/13483/14167/14169/14402/14405/14407/14658/14675/14799/14804/14805/14807/14811/15165/16508/16510/170738/70357/16535/66725/71960/338370/83814/18053/192167/110784/18189/18212/667742/74776/243725/18754/56508/19699/242662/20191/20273/210274/20541/81907	54
GO:0007015	BP	GO:0007015	actin filament organization	53/1145	445/23355	2.34e-09	6.29e-07	5.4e-07	242894/73910/268970/545481/234094/72754/230837/66898/12808/235431/13367/13383/22240/140580/14158/225288/14457/544963/57748/77569/215999/194401/77579/71602/231646/17919/17922/677884/11994/18613/218194/213556/102502/320472/243725/18754/69288/110380/27428/19261/66616/20411/74392/225115/118449/23963/21872/21916/110253/74569/76260/22138/245880	53
GO:0035249	BP	GO:0035249	synaptic transmission, glutamatergic	23/1145	111/23355	3.58e-09	9.12e-07	7.84e-07	12286/320127/244667/14802/14803/14804/14805/14807/110637/108071/14823/545156/66725/18053/192167/18189/18212/19699/26564/210274/20418/21960/208898	23
GO:0051963	BP	GO:0051963	regulation of synapse assembly	24/1145	121/23355	4.14e-09	1e-06	8.61e-07	210933/319387/11418/64085/13640/270190/13844/223254/396184/23888/14804/16180/331461/242384/320772/320840/192167/100042150/18189/18212/243725/18750/217692/29819	24
GO:0043087	BP	GO:0043087	regulation of GTPase activity	42/1145	318/23355	5.35e-09	1.23e-06	1.06e-06	109934/76117/231532/71544/234094/230837/12053/69993/320127/105445/13640/14683/29875/544963/545156/66725/26921/56349/18212/18613/227937/18845/243743/54712/19276/29809/241694/229877/107746/50779/20163/319934/217692/244668/74206/66616/57915/223754/21844/24001/22084/76260	42
GO:0050890	BP	GO:0050890	cognition	44/1145	345/23355	6.86e-09	1.51e-06	1.3e-06	210933/14266/11980/20238/224671/12288/12290/12661/66797/94109/18163/13123/320127/13411/15572/13844/13853/14402/14683/14799/14811/108071/71828/15932/241226/545156/16497/16867/17536/18189/18203/18212/242202/18795/18750/19165/19699/20317/210274/20418/66673/66860/21960/80286	44
GO:0031589	BP	GO:0031589	cell-substrate adhesion	45/1145	358/23355	7.28e-09	1.53e-06	1.32e-06	230379/239337/69538/226255/12053/56838/12554/12571/235431/13132/244667/13405/13430/330662/68813/13607/13640/270190/14158/72007/29875/319480/241226/16420/223272/83964/77569/26921/56349/246190/18613/83436/18754/74030/20163/19261/78473/20411/20745/77057/21844/110253/22283/22288/22371	45
GO:1902414	BP	GO:1902414	protein localization to cell junction	25/1145	136/23355	1.01e-08	2.04e-06	1.75e-06	18671/77531/11418/76380/13383/23859/224997/23888/268566/14811/74053/83964/545156/50791/26414/192167/18189/18613/56508/19699/380702/29819/20908/21872/665113	25
GO:2001257	BP	GO:2001257	regulation of cation channel activity	29/1145	179/23355	1.38e-08	2.67e-06	2.29e-06	238161/109676/11418/12286/69635/13383/13405/26903/13844/14167/14169/14811/269994/14873/15165/16497/16535/83814/192167/70729/18189/233571/18578/238871/234779/19017/19699/210274/380702	29
GO:0007156	BP	GO:0007156	homophilic cell adhesion via plasma membrane adhesion molecules	22/1145	110/23355	1.55e-08	2.89e-06	2.48e-06	215654/12554/12555/104010/12561/12563/12614/64085/244682/53870/13508/114873/270120/230868/67703/11994/18613/19274/19281/268902/330222/237979	22
GO:1904062	BP	GO:1904062	regulation of cation transmembrane transport	45/1145	370/23355	2.01e-08	3.59e-06	3.08e-06	238161/100986/109676/11418/12286/12288/12289/69635/13367/13383/13405/13430/13483/26903/13844/14167/14169/14360/14811/269994/14873/15165/16497/70357/80334/16535/16867/83814/192167/70729/18189/233571/18578/238871/59020/18795/234779/19017/18754/19165/19699/20191/210274/380702/20541	45
GO:0035418	BP	GO:0035418	protein localization to synapse	21/1145	103/23355	2.3e-08	3.97e-06	3.41e-06	77531/11418/76380/13383/23859/224997/23888/268566/14811/74053/545156/50791/26414/192167/18189/56508/19699/380702/29819/20908/665113	21
GO:0022604	BP	GO:0022604	regulation of cell morphogenesis	41/1145	328/23355	3.95e-08	6.58e-06	5.65e-06	76117/73910/12505/213084/13132/13367/13383/13430/330662/68813/13640/13823/71409/14360/14457/74053/331461/20403/545156/77579/71960/17919/83814/56349/74143/677884/18845/243743/54712/19090/19699/69288/104215/27428/70834/29819/20980/70573/21844/110253/245880	41
GO:0099003	BP	GO:0099003	vesicle-mediated transport in synapse	35/1145	257/23355	4.59e-08	7.4e-06	6.36e-06	11784/100503185/224671/12286/27062/320405/320127/13430/103967/238988/14169/74053/14823/269994/20403/16510/66725/50791/26414/17919/192167/110784/18189/18191/18750/18751/18754/56508/242662/77057/20908/78808/207227/20980/208898	35
GO:0097120	BP	GO:0097120	receptor localization to synapse	17/1145	72/23355	5.1e-08	7.96e-06	6.84e-06	77531/76380/13383/23859/23888/268566/74053/545156/50791/26414/192167/18189/56508/19699/380702/20908/665113	17
GO:0007611	BP	GO:0007611	learning or memory	39/1145	308/23355	5.95e-08	8.99e-06	7.72e-06	210933/14266/11980/20238/224671/12288/12290/66797/94109/18163/13123/320127/13411/15572/13844/13853/14402/14799/14811/108071/15932/241226/545156/16497/17536/18189/18203/18212/242202/18795/18750/19165/19699/20317/210274/20418/66673/66860/21960	39
GO:0032970	BP	GO:0032970	regulation of actin filament-based process	47/1145	411/23355	6.6e-08	9.67e-06	8.3e-06	242894/238161/109676/73910/268970/545481/234094/72754/230837/66898/12288/12614/235431/216033/13383/13640/14158/225288/319710/29875/544963/83964/57748/77569/667663/329421/93742/18578/238871/18613/213556/320472/243725/18754/69288/20191/110380/66616/74392/29819/225115/118449/23963/21872/21916/76260/245880	47
GO:0030048	BP	GO:0030048	actin filament-based movement	23/1145	129/23355	7.04e-08	1e-05	8.6e-06	238161/109676/12288/12289/216033/13383/319710/16535/77569/77579/71960/71602/231646/17919/17922/245049/83814/93742/18578/238871/20191/24052/330319	23
GO:0010976	BP	GO:0010976	positive regulation of neuron projection development	31/1145	220/23355	1.22e-07	1.69e-05	1.45e-05	11682/11881/50769/227541/12805/12808/13176/244667/13405/22240/15572/14348/14360/16180/29875/545156/50791/320840/18053/18212/18261/74143/75769/243725/107746/19699/26564/20317/29819/21844/22084	31
GO:0051966	BP	GO:0051966	regulation of synaptic transmission, glutamatergic	17/1145	79/23355	2.17e-07	2.92e-05	2.51e-05	320127/244667/14802/14805/14807/108071/14823/545156/66725/18053/192167/18189/18212/19699/26564/210274/21960	17
GO:0007265	BP	GO:0007265	Ras protein signal transduction	41/1145	352/23355	2.76e-07	3.33e-05	2.86e-05	109934/99371/215821/231532/71544/234094/72754/110596/381112/319974/12053/12554/12614/320127/13430/94176/140580/13844/223254/20403/545156/16706/333050/26921/56349/18053/211323/18613/74055/241694/107746/66922/20163/20662/20663/219140/117600/21844/24001/21858/223435	41
GO:0051965	BP	GO:0051965	positive regulation of synapse assembly	17/1145	80/23355	2.64e-07	3.33e-05	2.86e-05	210933/319387/11418/64085/13640/270190/13844/396184/14804/16180/331461/242384/192167/18189/18212/18750/29819	17
GO:0099504	BP	GO:0099504	synaptic vesicle cycle	31/1145	228/23355	2.76e-07	3.33e-05	2.86e-05	11784/100503185/224671/12286/27062/320405/320127/13430/103967/238988/14169/14823/20403/16510/66725/50791/192167/110784/18189/18191/18750/18751/18754/56508/242662/77057/20908/78808/207227/20980/208898	31
GO:1901888	BP	GO:1901888	regulation of cell junction assembly	30/1145	216/23355	2.68e-07	3.33e-05	2.86e-05	210933/319387/11418/64085/13640/270190/13844/223254/396184/23888/14804/16180/331461/29875/77569/242384/26921/320772/83814/320840/192167/100042150/18189/18212/243725/18750/107746/217692/29819/21872	30
GO:1990778	BP	GO:1990778	protein localization to cell periphery	42/1145	367/23355	3.21e-07	3.78e-05	3.25e-05	11733/109676/68146/100503572/74741/13132/13383/23859/13483/13823/13844/13853/23880/14677/23888/268566/14811/74053/545156/80334/50791/26414/17919/18189/107975/59020/102502/19092/235442/56508/104215/380702/78473/20411/20908/55943/665113/22084/70423/104718/76260/213081	42
GO:0048813	BP	GO:0048813	dendrite morphogenesis	27/1145	185/23355	3.86e-07	4.44e-05	3.81e-05	210933/12286/213084/18163/13175/103967/13508/15572/270190/13844/223254/14360/331461/545156/66725/17919/83814/192167/74143/218194/243725/19699/210274/217692/29819/21844/665113	27
GO:0030900	BP	GO:0030900	forebrain development	44/1145	397/23355	4.16e-07	4.57e-05	3.92e-05	67269/11682/68146/66797/13131/13175/70762/244667/110350/15572/13844/13869/14360/15364/320191/15496/67703/14725/66725/14013/77579/20602/211323/18183/18212/218194/18795/243743/19165/218772/19699/71137/268902/94229/319757/230676/57752/21416/81907/21960/73668/76260/209012/67263	44
GO:0099175	BP	GO:0099175	regulation of postsynapse organization	20/1145	111/23355	4.15e-07	4.57e-05	3.92e-05	217480/103967/14360/14804/16180/331461/545156/70530/66725/192167/18189/74143/243725/56508/19699/217692/29819/66860/21844/22084	20
GO:0050905	BP	GO:0050905	neuromuscular process	23/1145	143/23355	4.85e-07	5.21e-05	4.48e-05	109934/110532/67269/382543/11941/50769/12286/100072/94109/14167/14169/14658/14804/14811/16510/77579/27386/211323/18189/11994/268859/20273/21960	23
GO:0050773	BP	GO:0050773	regulation of dendrite development	22/1145	133/23355	5.21e-07	5.48e-05	4.71e-05	210933/11682/227541/213084/12808/110197/15572/270120/16180/331461/29875/545156/17919/83814/18212/74143/56508/19699/217692/29819/21844/665113	22
GO:0007411	BP	GO:0007411	axon guidance	32/1145	250/23355	7.05e-07	7.25e-05	6.23e-05	12561/12661/269784/244682/53870/13176/12934/13508/114873/13640/13840/270190/13844/16772/16773/16774/231876/14725/77579/18053/18261/18845/243743/54712/19274/19699/268902/20564/319757/23964/76260/67263	32
GO:0051962	BP	GO:0051962	positive regulation of nervous system development	40/1145	352/23355	7.3e-07	7.36e-05	6.32e-05	210933/319387/11418/20238/12561/213084/64085/244667/13508/13640/270190/13844/396184/14804/108071/16180/331461/76527/545156/242384/14725/17919/192167/211323/18189/18212/18261/74143/18845/243743/54712/18750/19699/268902/20317/319757/29819/23966/21844/24001	40
GO:0097485	BP	GO:0097485	neuron projection guidance	32/1145	251/23355	7.71e-07	7.61e-05	6.53e-05	12561/12661/269784/244682/53870/13176/12934/13508/114873/13640/13840/270190/13844/16772/16773/16774/231876/14725/77579/18053/18261/18845/243743/54712/19274/19699/268902/20564/319757/23964/76260/67263	32
GO:0010720	BP	GO:0010720	positive regulation of cell development	41/1145	368/23355	8.93e-07	8.64e-05	7.42e-05	18671/20238/12561/213084/12638/13132/244667/13430/330662/68813/13508/13640/13844/108071/331461/76527/545156/14725/17919/56349/211323/18212/18261/74143/54611/242202/18845/243743/54712/19090/19699/19726/268902/12394/20317/319757/29819/23966/21844/24001/110253	41
GO:0007160	BP	GO:0007160	cell-matrix adhesion	29/1145	218/23355	1.05e-06	9.73e-05	8.36e-05	230379/239337/12053/56838/12554/12571/235431/244667/13405/13607/13640/29875/319480/241226/16420/223272/83964/77569/26921/246190/18613/83436/74030/19261/78473/20411/77057/21844/22288	29
GO:0046578	BP	GO:0046578	regulation of Ras protein signal transduction	31/1145	242/23355	1.03e-06	9.73e-05	8.36e-05	109934/99371/215821/231532/71544/234094/72754/110596/381112/319974/12053/320127/13430/94176/13844/223254/20403/545156/26921/56349/18053/211323/74055/107746/20662/20663/219140/21844/24001/21858/223435	31
GO:0060996	BP	GO:0060996	dendritic spine development	21/1145	128/23355	1.08e-06	9.85e-05	8.46e-05	239985/18163/244667/103967/270190/13844/545156/66725/17919/18053/192167/211323/74143/243725/19699/330222/210274/217692/29819/21844/22084	21
GO:0106027	BP	GO:0106027	neuron projection organization	19/1145	109/23355	1.36e-06	0.000121537	0.000104389	18163/103967/270190/13844/14360/14811/545156/66725/17919/192167/74143/102502/243725/19699/210274/217692/29819/66860/21844	19
GO:0007269	BP	GO:0007269	neurotransmitter secretion	26/1145	186/23355	1.46e-06	0.000125716	0.000107979	11784/12286/27062/320405/320127/238988/14823/16510/66725/78771/192167/110784/18189/18191/18212/243725/18750/18751/18754/19276/242662/20908/78808/207227/20980/208898	26
GO:0099643	BP	GO:0099643	signal release from synapse	26/1145	186/23355	1.46e-06	0.000125716	0.000107979	11784/12286/27062/320405/320127/238988/14823/16510/66725/78771/192167/110784/18189/18191/18212/243725/18750/18751/18754/19276/242662/20908/78808/207227/20980/208898	26
GO:0008344	BP	GO:0008344	adult locomotory behavior	19/1145	110/23355	1.57e-06	0.000132862	0.000114117	76192/67269/20238/100568459/224671/12286/12288/12661/13131/14167/14169/14658/15932/545156/18203/11994/20273/56747/21916	19
GO:0030534	BP	GO:0030534	adult behavior	26/1145	187/23355	1.61e-06	0.000134522	0.000115542	76192/67269/11682/20238/100568459/224671/12286/12288/12661/66797/13131/14167/14169/14658/14805/15932/545156/18189/18203/11994/20273/330222/56747/210274/21916/209012	26
GO:0097061	BP	GO:0097061	dendritic spine organization	18/1145	101/23355	1.84e-06	0.000150482	0.00012925	18163/103967/270190/13844/14360/14811/545156/66725/17919/192167/74143/243725/19699/210274/217692/29819/66860/21844	18
GO:0021953	BP	GO:0021953	central nervous system neuron differentiation	30/1145	239/23355	2.34e-06	0.000188354	0.000161779	110532/78933/67269/110596/11941/12286/13176/13175/70762/244667/110350/15572/270190/13844/13869/14804/18189/18212/243743/18750/268902/19883/94229/319757/20678/20745/24069/230676/73668/67263	30
GO:0060997	BP	GO:0060997	dendritic spine morphogenesis	15/1145	74/23355	2.48e-06	0.000195139	0.000167607	18163/103967/270190/13844/545156/66725/17919/192167/74143/243725/19699/210274/217692/29819/21844	15
GO:0062237	BP	GO:0062237	protein localization to postsynapse	14/1145	65/23355	2.5e-06	0.000195139	0.000167607	13383/23859/23888/268566/14811/74053/545156/50791/26414/56508/380702/29819/20908/665113	14
GO:0035637	BP	GO:0035637	multicellular organismal signaling	22/1145	147/23355	2.95e-06	0.000226411	0.000194466	109676/12286/12288/12289/12290/216033/13483/14167/14799/83964/16508/16535/71960/18212/246190/238871/56508/20191/20273/20541/435766/21960	22
GO:0007612	BP	GO:0007612	learning	25/1145	182/23355	3.18e-06	0.000232762	0.000199922	210933/11980/20238/12288/12290/66797/94109/18163/320127/15572/13844/13853/14402/14811/108071/15932/545156/17536/18189/18212/19699/210274/66673/66860/21960	25
GO:0021537	BP	GO:0021537	telencephalon development	31/1145	255/23355	3.14e-06	0.000232762	0.000199922	67269/11682/68146/13131/70762/244667/13844/13869/15496/67703/66725/77579/20602/211323/18183/18212/218194/18795/243743/218772/19699/71137/268902/319757/230676/57752/81907/21960/76260/209012/67263	31
GO:0060078	BP	GO:0060078	regulation of postsynaptic membrane potential	19/1145	115/23355	3.12e-06	0.000232762	0.000199922	20238/320127/14169/14402/14405/14407/14799/14804/14805/14811/66725/18053/192167/110784/18189/243725/19699/210274/81907	19
GO:0001508	BP	GO:0001508	action potential	21/1145	138/23355	3.76e-06	0.000267095	0.00022941	109676/12288/12289/216033/13383/13405/13483/14167/14675/14799/14811/15165/16508/70357/16535/71960/83814/18212/56508/20191/20273	21
GO:0016079	BP	GO:0016079	synaptic vesicle exocytosis	21/1145	138/23355	3.76e-06	0.000267095	0.00022941	11784/12286/27062/320405/320127/238988/14823/16510/66725/192167/110784/18191/18750/18751/18754/242662/20908/78808/207227/20980/208898	21
GO:1903539	BP	GO:1903539	protein localization to postsynaptic membrane	13/1145	59/23355	4.35e-06	0.000305014	0.000261979	13383/23859/23888/268566/14811/74053/545156/50791/26414/56508/380702/20908/665113	13
GO:0034764	BP	GO:0034764	positive regulation of transmembrane transport	30/1145	247/23355	4.59e-06	0.000312818	0.000268682	18671/14081/238161/100986/109676/11418/74741/12288/12289/12638/13405/13430/13483/13844/13869/14169/14873/15165/16535/16867/83814/237542/233571/59020/18795/234779/19699/104215/20191/20411	30
GO:0034767	BP	GO:0034767	positive regulation of ion transmembrane transport	30/1145	247/23355	4.59e-06	0.000312818	0.000268682	18671/14081/238161/100986/109676/11418/74741/12288/12289/12638/13405/13430/13483/13844/13869/14169/14873/15165/16535/16867/83814/237542/233571/59020/18795/234779/19699/104215/20191/20411	30
GO:0032414	BP	GO:0032414	positive regulation of ion transmembrane transporter activity	19/1145	120/23355	5.95e-06	0.000392802	0.000337382	18671/238161/100986/109676/11418/12638/13405/13430/13844/14169/14873/15165/83814/233571/59020/18795/234779/19699/20191	19
GO:0070588	BP	GO:0070588	calcium ion transmembrane transport	33/1145	289/23355	6.01e-06	0.000392802	0.000337382	238161/109676/11941/12286/12288/12289/12290/12294/13367/13405/26903/270028/14169/14360/14811/14873/16439/16867/215999/338370/70729/74143/233571/18578/238871/171395/234779/18754/19165/20191/94249/20541/26946	33
GO:1901890	BP	GO:1901890	positive regulation of cell junction assembly	19/1145	120/23355	5.95e-06	0.000392802	0.000337382	210933/319387/11418/64085/13640/270190/13844/396184/14804/16180/331461/29875/242384/26921/192167/18189/18212/18750/29819	19
GO:0045761	BP	GO:0045761	regulation of adenylate cyclase activity	9/1145	29/23355	6.52e-06	0.000420339	0.000361033	110789/238161/100986/12288/12289/67252/14708/104443/21858	9
GO:0019932	BP	GO:0019932	second-messenger-mediated signaling	35/1145	318/23355	7.22e-06	0.000459461	0.000394635	238161/109676/12289/100072/67252/12554/76469/13405/14677/14683/108071/16706/333050/16867/66725/215999/52589/18018/18019/211323/18212/23984/54611/18576/238871/242202/29863/18585/18604/243725/56508/20191/24052/20541/23964	35
GO:0032535	BP	GO:0032535	regulation of cellular component size	42/1145	417/23355	8.71e-06	0.000546935	0.000469767	242894/23797/73910/268970/545481/11941/66898/12561/213084/239667/244667/13383/13430/12934/13508/13640/14158/225288/544963/57748/667663/329421/17919/211323/18261/18613/213556/102502/243743/243725/18754/19092/74370/110380/66616/74392/225115/23963/21916/21960/22084/245880	42
GO:0032956	BP	GO:0032956	regulation of actin cytoskeleton organization	38/1145	364/23355	1.02e-05	0.00063491	0.00054533	242894/73910/268970/545481/234094/72754/230837/66898/12614/235431/13383/13640/14158/225288/29875/544963/83964/57748/77569/667663/329421/18613/213556/320472/243725/18754/69288/110380/66616/74392/29819/225115/118449/23963/21872/21916/76260/245880	38
GO:0050805	BP	GO:0050805	negative regulation of synaptic transmission	15/1145	83/23355	1.1e-05	0.000670712	0.00057608	66082/320127/14677/14799/14804/14805/14807/66725/243725/56508/210274/81840/66673/29819/21960	15
GO:0050770	BP	GO:0050770	regulation of axonogenesis	24/1145	186/23355	1.46e-05	0.000883305	0.000758679	12286/12561/213084/13131/239667/244667/13508/13640/13844/241568/17919/211323/18212/18261/18845/243743/54712/268902/217692/21844/24001/21960/22084/338362	24
GO:0032411	BP	GO:0032411	positive regulation of transporter activity	19/1145	128/23355	1.54e-05	0.000922211	0.000792095	18671/238161/100986/109676/11418/12638/13405/13430/13844/14169/14873/15165/83814/233571/59020/18795/234779/19699/20191	19
GO:0099560	BP	GO:0099560	synaptic membrane adhesion	9/1145	32/23355	1.6e-05	0.000942625	0.000809629	13640/23888/16180/241568/50791/320772/192167/18189/13602	9
GO:1990138	BP	GO:1990138	neuron projection extension	25/1145	200/23355	1.7e-05	0.00099103	0.000851204	319974/12561/213084/13175/239667/244667/13430/12934/13508/396184/29875/20403/17919/83814/211323/18261/243743/20564/319757/70834/214585/20980/21844/81907/21960	25
GO:0060048	BP	GO:0060048	cardiac muscle contraction	19/1145	129/23355	1.73e-05	0.000995671	0.000855191	238161/109676/12288/12289/216033/13383/13405/16535/26399/83814/18578/238871/242202/19165/20191/24052/20541/435766/22138	19
GO:0055117	BP	GO:0055117	regulation of cardiac muscle contraction	13/1145	67/23355	1.9e-05	0.00107839	0.000926239	238161/109676/12288/216033/13383/13405/16535/18578/238871/242202/20191/20541/435766	13
GO:0008154	BP	GO:0008154	actin polymerization or depolymerization	26/1145	215/23355	2.09e-05	0.00117773	0.00101157	242894/73910/268970/545481/66898/12808/13367/13383/14158/225288/14457/544963/57748/194401/18613/213556/243725/18754/110380/66616/74392/225115/23963/21916/74569/245880	26
GO:0006836	BP	GO:0006836	neurotransmitter transport	28/1145	242/23355	2.33e-05	0.00129729	0.00111425	11784/12286/27062/320405/320127/238988/14823/16510/66725/78771/192167/110784/18189/18191/18212/243725/18750/18751/18754/19276/242662/229706/20908/78808/207227/64176/20980/208898	28
GO:0001764	BP	GO:0001764	neuron migration	24/1145	192/23355	2.49e-05	0.0013676	0.00117464	319387/319974/12614/12661/13131/13176/13175/244667/13869/270120/14360/67703/320772/77579/215690/211323/18183/18212/218194/19699/59009/20745/209012/67263	24
GO:1904064	BP	GO:1904064	positive regulation of cation transmembrane transport	22/1145	168/23355	2.6e-05	0.00141144	0.0012123	238161/100986/109676/11418/12288/12289/13405/13430/13483/13844/14169/14873/15165/16535/16867/83814/233571/59020/18795/234779/19699/20191	22
GO:0010811	BP	GO:0010811	positive regulation of cell-substrate adhesion	19/1145	133/23355	2.68e-05	0.00142248	0.00122178	56838/12554/12571/13132/244667/13405/13430/330662/68813/29875/26921/56349/83436/18754/74030/20163/78473/110253/22288	19
GO:0031503	BP	GO:0031503	protein-containing complex localization	29/1145	257/23355	2.69e-05	0.00142248	0.00122178	238161/77531/76380/13383/23859/13430/103967/110350/23888/268566/74053/269994/245866/545156/50791/26414/17919/192167/18189/241694/56508/19699/24052/380702/29819/20908/665113/73668/213081	29
GO:0099633	BP	GO:0099633	protein localization to postsynaptic specialization membrane	9/1145	34/23355	2.74e-05	0.00142248	0.00122178	13383/23859/23888/268566/545156/50791/56508/380702/665113	9
GO:0099645	BP	GO:0099645	neurotransmitter receptor localization to postsynaptic specialization membrane	9/1145	34/23355	2.74e-05	0.00142248	0.00122178	13383/23859/23888/268566/545156/50791/56508/380702/665113	9
GO:0021954	BP	GO:0021954	central nervous system neuron development	16/1145	100/23355	2.78e-05	0.00142774	0.0012263	110532/78933/67269/110596/13176/13175/70762/244667/270190/13844/18212/243743/18750/268902/94229/230676	16
GO:0046928	BP	GO:0046928	regulation of neurotransmitter secretion	18/1145	123/23355	3.12e-05	0.00158792	0.00136388	11784/12286/320127/14823/16510/66725/78771/192167/110784/18191/18212/243725/18750/18751/18754/242662/78808/207227	18
GO:0051489	BP	GO:0051489	regulation of filopodium assembly	11/1145	52/23355	3.55e-05	0.00176885	0.00151928	103967/22240/667663/329421/192167/18189/75769/243725/104215/29819/23963	11
GO:0099068	BP	GO:0099068	postsynapse assembly	9/1145	35/23355	3.52e-05	0.00176885	0.00151928	13844/14804/16180/50791/192167/18189/19699/210274/217692	9
GO:0002064	BP	GO:0002064	epithelial cell development	29/1145	262/23355	3.85e-05	0.00189876	0.00163086	18671/100986/11941/107993/12571/12638/12822/13405/13982/319710/244653/71602/667663/329421/93742/11994/18613/18795/102502/107746/218772/19726/19886/27428/74206/319757/21872/21916/110253	29
GO:0110053	BP	GO:0110053	regulation of actin filament organization	30/1145	276/23355	4.02e-05	0.00196154	0.00168479	242894/73910/268970/545481/234094/72754/230837/66898/235431/13383/14158/225288/544963/57748/77569/18613/213556/320472/243725/18754/110380/66616/74392/225115/118449/23963/21872/21916/76260/245880	30
GO:0060998	BP	GO:0060998	regulation of dendritic spine development	14/1145	82/23355	4.15e-05	0.00200566	0.00172268	244667/103967/545156/18053/192167/211323/74143/243725/19699/330222/210274/29819/21844/22084	14
GO:0001964	BP	GO:0001964	startle response	9/1145	36/23355	4.49e-05	0.0021101	0.00181238	94109/14658/14804/14811/16510/27386/211323/18189/11994	9
GO:0035773	BP	GO:0035773	insulin secretion involved in cellular response to glucose stimulus	15/1145	93/23355	4.45e-05	0.0021101	0.00181238	101772/12289/12290/12638/13640/16847/26921/18189/18575/18576/18754/19275/19276/21416/21844	15
GO:0060292	BP	GO:0060292	long-term synaptic depression	9/1145	36/23355	4.49e-05	0.0021101	0.00181238	66082/320127/14799/14804/243725/210274/81840/66673/29819	9
GO:0006887	BP	GO:0006887	exocytosis	38/1145	391/23355	5.01e-05	0.002331	0.00200211	109934/11784/99371/12286/12288/27062/320405/12638/27278/320127/238988/14158/14823/331461/16510/66725/194401/77579/17919/192167/110784/18189/18191/18750/18751/18754/235442/56508/242662/20908/78808/207227/238266/20980/83672/208898/77573/22365	38
GO:2000300	BP	GO:2000300	regulation of synaptic vesicle exocytosis	14/1145	84/23355	5.47e-05	0.00251703	0.0021619	11784/320127/14823/16510/66725/192167/110784/18191/18750/18751/18754/242662/78808/207227	14
GO:0043547	BP	GO:0043547	positive regulation of GTPase activity	26/1145	228/23355	5.76e-05	0.00262859	0.00225772	109934/231532/71544/234094/230837/105445/14683/545156/26921/56349/227937/29809/241694/229877/107746/50779/20163/217692/244668/74206/66616/57915/223754/21844/24001/22084	26
GO:0048588	BP	GO:0048588	developmental cell growth	29/1145	269/23355	6.22e-05	0.00280101	0.00240581	238161/319974/12561/213084/12808/13175/239667/244667/13430/12934/13508/13640/396184/29875/20403/17919/83814/211323/18261/243743/20564/319757/70834/214585/20980/21844/81907/21960/106628	29
GO:0060122	BP	GO:0060122	inner ear receptor cell stereocilium organization	10/1145	46/23355	6.26e-05	0.00280101	0.00240581	110789/11941/433899/667663/329421/11994/102502/110253/109181/76260	10
GO:0006941	BP	GO:0006941	striated muscle contraction	21/1145	167/23355	7.16e-05	0.00314175	0.00269848	238161/109676/50769/12288/12289/216033/13383/13405/16535/26399/71960/83814/18578/238871/242202/19165/20191/24052/20541/435766/22138	21
GO:0051668	BP	GO:0051668	localization within membrane	15/1145	97/23355	7.34e-05	0.00314175	0.00269848	12286/12554/13383/23859/94176/14658/268566/50791/192167/18189/19699/380702/20411/22084/213081	15
GO:0051968	BP	GO:0051968	positive regulation of synaptic transmission, glutamatergic	9/1145	38/23355	7.12e-05	0.00314175	0.00269848	14802/18053/192167/18189/18212/19699/26564/210274/21960	9
GO:0070252	BP	GO:0070252	actin-mediated cell contraction	15/1145	97/23355	7.34e-05	0.00314175	0.00269848	238161/109676/12288/12289/216033/13383/319710/16535/77569/83814/93742/18578/238871/20191/24052	15
GO:0099072	BP	GO:0099072	regulation of postsynaptic membrane neurotransmitter receptor levels	15/1145	97/23355	7.34e-05	0.00314175	0.00269848	13383/23859/13430/103967/23888/268566/74053/269994/545156/50791/26414/56508/380702/20908/665113	15
GO:0019722	BP	GO:0019722	calcium-mediated signaling	23/1145	193/23355	7.7e-05	0.00323975	0.00278265	238161/109676/12289/100072/12554/76469/13405/108071/333050/16867/66725/215999/52589/18018/18019/211323/18212/18604/243725/20191/24052/20541/23964	23
GO:0030832	BP	GO:0030832	regulation of actin filament length	23/1145	193/23355	7.7e-05	0.00323975	0.00278265	242894/73910/268970/545481/66898/13383/14158/225288/544963/57748/667663/329421/18613/213556/243725/18754/110380/66616/74392/225115/23963/21916/245880	23
GO:0007266	BP	GO:0007266	Rho protein signal transduction	22/1145	181/23355	8.15e-05	0.00339609	0.00291693	109934/71544/234094/72754/110596/381112/12053/12554/12614/223254/20403/545156/56349/18053/18613/20662/20663/219140/117600/21844/24001/223435	22
GO:0010770	BP	GO:0010770	positive regulation of cell morphogenesis involved in differentiation	15/1145	98/23355	8.28e-05	0.00342267	0.00293976	213084/13132/13430/330662/68813/331461/545156/17919/56349/74143/19090/19699/29819/21844/110253	15
GO:0090596	BP	GO:0090596	sensory organ morphogenesis	32/1145	315/23355	8.4e-05	0.00344086	0.00295539	109934/67269/11941/50769/12614/170788/13508/270190/13844/270120/14254/15165/380614/241226/320398/667663/329421/18212/11994/102502/19274/218772/26564/330222/237979/110380/29819/110253/72747/76260/213081/21417	32
GO:0031279	BP	GO:0031279	regulation of cyclase activity	9/1145	39/23355	8.86e-05	0.00357085	0.00306704	110789/238161/100986/12288/12289/67252/14708/104443/21858	9
GO:0086065	BP	GO:0086065	cell communication involved in cardiac conduction	9/1145	39/23355	8.86e-05	0.00357085	0.00306704	109676/12288/12289/216033/16535/238871/20191/20541/435766	9
GO:0010810	BP	GO:0010810	regulation of cell-substrate adhesion	25/1145	221/23355	9.04e-05	0.00361177	0.00310218	230379/12053/56838/12554/12571/235431/13132/244667/13405/13430/330662/68813/13640/29875/77569/26921/56349/83436/18754/74030/20163/78473/20745/110253/22288	25
GO:0060074	BP	GO:0060074	synapse maturation	8/1145	31/23355	9.35e-05	0.00370805	0.00318488	244667/13869/230868/18027/100042150/18189/19699/56747	8
GO:0048638	BP	GO:0048638	regulation of developmental growth	38/1145	403/23355	9.51e-05	0.003739	0.00321146	100705/238161/50769/12288/12561/213084/239667/244667/13383/13430/12934/13508/13640/223650/13869/14683/15364/20403/16468/109241/17919/83814/211323/18261/18795/102502/243743/19090/319757/70834/56274/20980/21388/21416/21960/106628/52357/56449	38
GO:1903169	BP	GO:1903169	regulation of calcium ion transmembrane transport	21/1145	171/23355	0.000101009	0.00393934	0.00338354	238161/109676/12286/12288/12289/13367/13405/26903/14169/14360/14873/16867/70729/233571/18578/238871/234779/18754/19165/20191/20541	21
GO:0006814	BP	GO:0006814	sodium ion transport	26/1145	236/23355	0.000102406	0.00395941	0.00340078	23797/11418/241118/76856/12805/13405/13430/14167/14169/333669/14683/15165/100503085/338370/83814/269513/18795/20273/76775/114644/94249/94229/229706/20541/226999/331004	26
GO:0021695	BP	GO:0021695	cerebellar cortex development	12/1145	68/23355	0.000104042	0.00395941	0.00340078	67269/11941/12286/14804/77579/78286/18189/71137/19883/56747/319757/73668	12
GO:0060560	BP	GO:0060560	developmental growth involved in morphogenesis	29/1145	277/23355	0.000104798	0.00395941	0.00340078	319974/12561/213084/12808/13175/239667/244667/13430/12934/13508/13640/13982/396184/29875/20403/269152/17919/83814/211323/18261/243743/20564/319757/70834/214585/20980/21844/81907/21960	29
GO:0099601	BP	GO:0099601	regulation of neurotransmitter receptor activity	12/1145	68/23355	0.000104042	0.00395941	0.00340078	69635/224997/244310/13844/14811/269994/192167/18189/19017/19699/210274/380702	12
GO:0007157	BP	GO:0007157	heterophilic cell-cell adhesion via plasma membrane cell adhesion molecules	10/1145	49/23355	0.000110337	0.00410455	0.00352544	12561/170788/14804/230868/331461/192167/18189/23963/23964/23966	10
GO:0090659	BP	GO:0090659	walking behavior	10/1145	49/23355	0.000110337	0.00410455	0.00352544	76192/67269/12286/12288/13131/14658/15932/11994/20273/214585	10
GO:0018209	BP	GO:0018209	peptidyl-serine modification	35/1145	363/23355	0.000114326	0.00422045	0.00362498	100986/23797/227541/12505/13175/70762/13405/13548/13853/15275/72612/231876/66725/71738/328329/667663/329421/18189/18212/238871/18604/227120/224860/18750/18751/18754/19090/19092/20112/74370/170755/69726/72902/56480/23963	35
GO:0001954	BP	GO:0001954	positive regulation of cell-matrix adhesion	11/1145	59/23355	0.000120083	0.004345	0.00373196	56838/12554/12571/244667/13405/29875/26921/83436/74030/78473/22288	11
GO:0046847	BP	GO:0046847	filopodium assembly	12/1145	69/23355	0.000120395	0.004345	0.00373196	103967/22240/667663/329421/192167/18189/75769/243725/104215/219140/29819/23963	12
GO:0086003	BP	GO:0086003	cardiac muscle cell contraction	12/1145	69/23355	0.000120395	0.004345	0.00373196	238161/109676/12288/12289/216033/13383/16535/83814/18578/238871/20191/24052	12
GO:0006816	BP	GO:0006816	calcium ion transport	39/1145	423/23355	0.000124527	0.00446084	0.00383145	238161/109676/11941/24115/12286/12288/12289/12290/12294/76856/13367/13405/26903/13853/270028/14169/14360/14811/14873/16439/16867/215999/107589/338370/18018/70729/74143/233571/18578/238871/171395/234779/18751/18754/19165/20191/94249/20541/26946	39
GO:1902903	BP	GO:1902903	regulation of supramolecular fiber organization	36/1145	380/23355	0.000130813	0.00465155	0.00399525	242894/73910/268970/545481/234094/72754/230837/66898/214444/235431/13383/13548/26903/78798/14158/225288/544963/57748/77569/260315/18613/109054/213556/320472/243725/18754/110380/66616/74392/225115/118449/23963/21872/21916/76260/245880	36
GO:0030041	BP	GO:0030041	actin filament polymerization	22/1145	188/23355	0.000142803	0.00500373	0.00429775	242894/73910/268970/545481/66898/12808/13367/13383/14158/225288/14457/544963/57748/18613/243725/18754/66616/225115/23963/21916/74569/245880	22
GO:0035023	BP	GO:0035023	regulation of Rho protein signal transduction	18/1145	138/23355	0.000143821	0.00500373	0.00429775	109934/71544/234094/72754/110596/381112/12053/223254/20403/545156/56349/18053/20662/20663/219140/21844/24001/223435	18
GO:0071805	BP	GO:0071805	potassium ion transmembrane transport	23/1145	201/23355	0.000143017	0.00500373	0.00429775	238161/100986/109676/12289/13383/13430/13483/15165/16497/16508/16510/170738/70357/80334/16522/16535/226922/16532/338370/83814/94249/226999/331004	23
GO:0001505	BP	GO:0001505	regulation of neurotransmitter levels	27/1145	255/23355	0.000148259	0.00512129	0.00439872	67269/11784/12286/27062/320405/320127/238988/14823/16510/66725/78771/192167/110784/18189/18191/18212/243725/18750/18751/18754/19276/242662/20908/78808/207227/20980/208898	27
GO:0042490	BP	GO:0042490	mechanoreceptor differentiation	14/1145	92/23355	0.000150744	0.00513835	0.00441338	110789/11941/14402/433899/171166/667663/329421/18212/11994/102502/110253/109181/76260/22283	14
GO:0051491	BP	GO:0051491	positive regulation of filopodium assembly	8/1145	33/23355	0.000150878	0.00513835	0.00441338	103967/22240/667663/329421/192167/75769/104215/23963	8
GO:0007254	BP	GO:0007254	JNK cascade	21/1145	176/23355	0.00015242	0.00515455	0.00442729	108909/13132/270190/14167/14169/26408/26409/26921/26414/14013/18795/107746/26564/59009/237353/19261/70834/56274/330177/665113/209012	21
GO:1904375	BP	GO:1904375	regulation of protein localization to cell periphery	18/1145	139/23355	0.000157783	0.00529888	0.00455126	13132/13383/13483/13844/13853/14677/23888/545156/50791/17919/18189/102502/56508/104215/20411/20908/55943/665113	18
GO:0043113	BP	GO:0043113	receptor clustering	12/1145	71/23355	0.000159793	0.00532936	0.00457744	12286/13383/23859/14658/268566/50791/192167/18189/19699/380702/20411/213081	12
GO:0051339	BP	GO:0051339	regulation of lyase activity	9/1145	42/23355	0.000163332	0.00541008	0.00464676	110789/238161/100986/12288/12289/67252/14708/104443/21858	9
GO:0010769	BP	GO:0010769	regulation of cell morphogenesis involved in differentiation	16/1145	116/23355	0.000172044	0.00565022	0.00485302	213084/13132/13430/330662/68813/13640/331461/545156/17919/56349/74143/19090/19699/29819/21844/110253	16
GO:0051588	BP	GO:0051588	regulation of neurotransmitter transport	18/1145	140/23355	0.000172918	0.00565022	0.00485302	11784/12286/320127/14823/16510/66725/78771/192167/110784/18191/18212/243725/18750/18751/18754/242662/78808/207227	18
GO:0035640	BP	GO:0035640	exploration behavior	8/1145	34/23355	0.000188885	0.00608965	0.00523046	12661/14402/66725/268890/18754/210274/94229/21960	8
GO:1905606	BP	GO:1905606	regulation of presynapse assembly	8/1145	34/23355	0.000188885	0.00608965	0.00523046	223254/23888/14804/16180/331461/320772/192167/18189	8
GO:0006942	BP	GO:0006942	regulation of striated muscle contraction	13/1145	83/23355	0.000191264	0.0061255	0.00526125	238161/109676/12288/216033/13383/13405/16535/18578/238871/242202/20191/20541/435766	13
GO:0099010	BP	GO:0099010	modification of postsynaptic structure	7/1145	26/23355	0.00019327	0.00614902	0.00528145	30785/70598/545156/77579/17919/21844/245880	7
GO:0007613	BP	GO:0007613	memory	19/1145	154/23355	0.0001997	0.00619069	0.00531724	20238/224671/94109/13123/14402/14799/14811/15932/241226/545156/18203/18212/242202/18795/19165/19699/20317/210274/66673	19
GO:0008360	BP	GO:0008360	regulation of cell shape	19/1145	154/23355	0.0001997	0.00619069	0.00531724	76117/73910/13367/13383/13823/71409/14360/14457/77579/71960/677884/18845/243743/54712/69288/104215/27428/70573/245880	19
GO:0010765	BP	GO:0010765	positive regulation of sodium ion transport	9/1145	43/23355	0.000197663	0.00619069	0.00531724	23797/12805/13405/13430/14167/14169/14683/83814/18795	9
GO:0021955	BP	GO:0021955	central nervous system neuron axonogenesis	9/1145	43/23355	0.000197663	0.00619069	0.00531724	110532/110596/13176/13175/270190/13844/243743/18750/230676	9
GO:0006936	BP	GO:0006936	muscle contraction	30/1145	303/23355	0.000216573	0.00654593	0.00562236	238161/109676/71544/50769/12288/12289/216033/13383/13405/238130/68813/16535/26399/71960/107589/242702/83814/18578/238871/242202/18750/19165/229877/20191/24052/20541/240725/21916/435766/22138	30
GO:0010880	BP	GO:0010880	regulation of release of sequestered calcium ion into cytosol by sarcoplasmic reticulum	6/1145	19/23355	0.000214191	0.00654593	0.00562236	109676/13405/14873/238871/20191/20541	6
GO:0061178	BP	GO:0061178	regulation of insulin secretion involved in cellular response to glucose stimulus	13/1145	84/23355	0.000216277	0.00654593	0.00562236	101772/12289/12290/12638/13640/16847/26921/18189/18575/18576/18754/21416/21844	13
GO:0072578	BP	GO:0072578	neurotransmitter-gated ion channel clustering	6/1145	19/23355	0.000214191	0.00654593	0.00562236	14658/268566/192167/18189/19699/380702	6
GO:0006638	BP	GO:0006638	neutral lipid metabolic process	18/1145	143/23355	0.000226209	0.00679469	0.00583602	381072/76192/66082/14081/11813/12359/264064/217480/110197/320127/13982/15450/14245/64898/74055/18947/20660/21416	18
GO:0071322	BP	GO:0071322	cellular response to carbohydrate stimulus	19/1145	156/23355	0.000236336	0.00705508	0.00605967	101772/12289/12290/12638/13640/16847/26921/18189/18575/18576/18795/18750/18751/18754/19275/19276/20112/21416/21844	19
GO:0051017	BP	GO:0051017	actin filament bundle assembly	20/1145	169/23355	0.000241918	0.00713483	0.00612817	268970/234094/72754/230837/66898/235431/22240/14457/77569/77579/11994/218194/102502/320472/243725/20411/118449/21872/110253/76260	20
GO:1905475	BP	GO:1905475	regulation of protein localization to membrane	22/1145	195/23355	0.000241959	0.00713483	0.00612817	74741/13132/13383/13483/13844/13853/14360/103978/23888/545156/50791/17919/18189/59020/102502/56508/104215/380702/20411/20908/55943/665113	22
GO:0060113	BP	GO:0060113	inner ear receptor cell differentiation	13/1145	85/23355	0.00024404	0.0071526	0.00614344	110789/11941/14402/433899/171166/667663/329421/11994/102502/110253/109181/76260/22283	13
GO:0030201	BP	GO:0030201	heparan sulfate proteoglycan metabolic process	7/1145	27/23355	0.000249939	0.00728135	0.00625402	23908/50787/15450/83398/235534/240725/21416	7
GO:0060119	BP	GO:0060119	inner ear receptor cell development	11/1145	64/23355	0.000255082	0.00738668	0.00634449	110789/11941/14402/433899/667663/329421/11994/102502/110253/109181/76260	11
GO:0010359	BP	GO:0010359	regulation of anion channel activity	5/1145	13/23355	0.000259657	0.00743019	0.00638186	18671/12638/108071/15275/18750	5
GO:0099159	BP	GO:0099159	regulation of modification of postsynaptic structure	5/1145	13/23355	0.000259657	0.00743019	0.00638186	30785/545156/77579/17919/21844	5
GO:0006029	BP	GO:0006029	proteoglycan metabolic process	12/1145	75/23355	0.000272348	0.00774751	0.0066544	239337/23908/50787/15932/15450/71738/83398/235534/170441/72902/240725/21416	12
GO:1901019	BP	GO:1901019	regulation of calcium ion transmembrane transporter activity	13/1145	86/23355	0.000274795	0.00777139	0.00667492	238161/109676/12286/13405/26903/14169/14873/70729/233571/18578/238871/234779/20191	13
GO:0003351	BP	GO:0003351	epithelial cilium movement involved in extracellular fluid movement	8/1145	36/23355	0.000288546	0.00804865	0.00691305	100048534/13411/16348/75050/19726/66722/74362/209012	8
GO:0018105	BP	GO:0018105	peptidyl-serine phosphorylation	32/1145	337/23355	0.000289591	0.00804865	0.00691305	100986/23797/227541/12505/13175/70762/13405/13548/13853/15275/231876/66725/328329/667663/329421/18189/18212/238871/18604/227120/224860/18750/18751/18754/19090/19092/20112/74370/170755/69726/56480/23963	32
GO:0097106	BP	GO:0097106	postsynaptic density organization	8/1145	36/23355	0.000288546	0.00804865	0.00691305	14804/16180/192167/18189/19699/210274/217692/81907	8
GO:0061001	BP	GO:0061001	regulation of dendritic spine morphogenesis	10/1145	55/23355	0.000300811	0.00831271	0.00713986	103967/545156/66725/192167/74143/243725/19699/217692/29819/21844	10
GO:0003012	BP	GO:0003012	muscle system process	37/1145	412/23355	0.000307479	0.00833277	0.00715709	238161/109676/71544/50769/12288/12289/76469/216033/13383/13405/238130/68813/57080/16468/16535/26399/71960/107589/242702/83814/18018/18578/238871/242202/18585/18750/19165/229877/20191/24052/20541/240725/21844/21916/435766/106628/22138	37
GO:0045785	BP	GO:0045785	positive regulation of cell adhesion	39/1145	442/23355	0.000305922	0.00833277	0.00715709	12053/108723/12400/56838/12505/12554/12571/13132/244667/13405/13430/330662/68813/26903/14347/751864/54167/29875/269152/26921/56349/67050/58205/83436/27205/18750/18754/19273/74030/20163/12394/19261/78473/20908/21872/110253/22084/22288/11906	39
GO:0051258	BP	GO:0051258	protein polymerization	29/1145	295/23355	0.00030843	0.00833277	0.00715709	242894/73910/268970/545481/66898/71276/214444/12808/13367/13383/13430/103967/13548/14158/225288/14457/544963/57748/260315/74143/18613/243725/18754/66616/225115/23963/21916/74569/245880	29
GO:0061572	BP	GO:0061572	actin filament bundle organization	20/1145	172/23355	0.000305893	0.00833277	0.00715709	268970/234094/72754/230837/66898/235431/22240/14457/77569/77579/11994/218194/102502/320472/243725/20411/118449/21872/110253/76260	20
GO:2000310	BP	GO:2000310	regulation of NMDA receptor activity	7/1145	28/23355	0.000319245	0.00857705	0.0073669	69635/13844/14811/192167/18189/19017/19699	7
GO:0017157	BP	GO:0017157	regulation of exocytosis	25/1145	240/23355	0.000329108	0.00869559	0.00746872	109934/11784/12286/27062/320405/12638/320127/14158/14823/331461/16510/66725/17919/192167/110784/18191/18750/18751/18754/235442/56508/242662/78808/207227/20980	25
GO:0072659	BP	GO:0072659	protein localization to plasma membrane	29/1145	296/23355	0.000326314	0.00869559	0.00746872	11733/109676/74741/13132/13383/13483/13823/13844/13853/23880/74053/545156/80334/17919/18189/107975/59020/102502/19092/235442/104215/78473/20411/20908/55943/665113/70423/104718/76260	29
GO:0090630	BP	GO:0090630	activation of GTPase activity	14/1145	99/23355	0.00033085	0.00869559	0.00746872	109934/231532/71544/234094/29809/241694/107746/217692/244668/74206/57915/223754/21844/24001	14
GO:0099565	BP	GO:0099565	chemical synaptic transmission, postsynaptic	14/1145	99/23355	0.00033085	0.00869559	0.00746872	20238/320127/14402/14804/14805/14811/66725/18053/192167/18189/243725/19699/210274/81907	14
GO:0007215	BP	GO:0007215	glutamate receptor signaling pathway	9/1145	46/23355	0.000338409	0.00879864	0.00755723	14360/14805/14807/14811/108071/14823/545156/18795/21844	9
GO:0021696	BP	GO:0021696	cerebellar cortex morphogenesis	9/1145	46/23355	0.000338409	0.00879864	0.00755723	67269/11941/12286/14804/18189/71137/19883/319757/73668	9
GO:0021549	BP	GO:0021549	cerebellum development	15/1145	111/23355	0.000340519	0.00880614	0.00756368	67269/11941/12286/12805/13131/14402/14804/77579/78286/18189/71137/19883/56747/319757/73668	15
GO:0086001	BP	GO:0086001	cardiac muscle cell action potential	10/1145	56/23355	0.000350317	0.00901135	0.00773993	109676/12288/12289/216033/13383/13405/16508/16535/83814/20191	10
GO:0086004	BP	GO:0086004	regulation of cardiac muscle cell contraction	8/1145	37/23355	0.000352471	0.00901878	0.00774631	238161/109676/12288/216033/13383/18578/238871/20191	8
GO:0099111	BP	GO:0099111	microtubule-based transport	22/1145	201/23355	0.000370786	0.00943747	0.00810593	78933/67269/71435/67774/100048534/23859/13411/13518/110350/245866/16348/75050/56273/19726/66722/74362/214585/29819/81907/73668/209012/213081	22
GO:0014808	BP	GO:0014808	release of sequestered calcium ion into cytosol by sarcoplasmic reticulum	6/1145	21/23355	0.000393733	0.00971477	0.0083441	109676/13405/14873/238871/20191/20541	6
GO:0019226	BP	GO:0019226	transmission of nerve impulse	13/1145	89/23355	0.000387657	0.00971477	0.0083441	12286/12290/13483/14167/14799/83964/16508/71960/18212/246190/56508/20273/21960	13
GO:0031290	BP	GO:0031290	retinal ganglion cell axon guidance	6/1145	21/23355	0.000393733	0.00971477	0.0083441	13640/270190/13844/18261/19274/268902	6
GO:0045475	BP	GO:0045475	locomotor rhythm	6/1145	21/23355	0.000393733	0.00971477	0.0083441	382543/16508/16847/26414/17978/11906	6
GO:0060079	BP	GO:0060079	excitatory postsynaptic potential	13/1145	89/23355	0.000387657	0.00971477	0.0083441	20238/320127/14804/14805/14811/66725/18053/192167/18189/243725/19699/210274/81907	13
GO:1900006	BP	GO:1900006	positive regulation of dendrite development	6/1145	21/23355	0.000393733	0.00971477	0.0083441	11682/12808/15572/16180/29875/74143	6
GO:0001941	BP	GO:0001941	postsynaptic membrane organization	9/1145	47/23355	0.000400559	0.00974816	0.00837278	13844/14658/268566/50791/192167/18189/19699/380702/20411	9
GO:0007628	BP	GO:0007628	adult walking behavior	9/1145	47/23355	0.000400559	0.00974816	0.00837278	76192/67269/12286/12288/13131/14658/15932/11994/20273	9
GO:0098698	BP	GO:0098698	postsynaptic specialization assembly	7/1145	29/23355	0.00040315	0.00974816	0.00837278	14804/16180/192167/18189/19699/210274/217692	7
GO:1904861	BP	GO:1904861	excitatory synapse assembly	7/1145	29/23355	0.00040315	0.00974816	0.00837278	14804/16180/192167/18189/19699/210274/217692	7
GO:0021587	BP	GO:0021587	cerebellum morphogenesis	10/1145	57/23355	0.000406429	0.00977856	0.0083989	67269/11941/12286/13131/14804/18189/71137/19883/319757/73668	10
GO:0099174	BP	GO:0099174	regulation of presynapse organization	8/1145	38/23355	0.000427467	0.0102338	0.00878991	223254/23888/14804/16180/331461/320772/192167/18189	8
GO:0008064	BP	GO:0008064	regulation of actin polymerization or depolymerization	21/1145	190/23355	0.000437611	0.0104251	0.00895419	242894/73910/268970/545481/66898/13383/14158/225288/544963/57748/18613/213556/243725/18754/110380/66616/74392/225115/23963/21916/245880	21
GO:0050772	BP	GO:0050772	positive regulation of axonogenesis	14/1145	102/23355	0.000451833	0.0107111	0.00919985	12561/244667/13508/13640/17919/211323/18212/18261/18845/243743/54712/268902/21844/24001	14
GO:0009914	BP	GO:0009914	hormone transport	34/1145	376/23355	0.000467587	0.010911	0.00937152	18671/101772/12163/12288/12289/12290/12638/13132/13640/14683/15364/545156/16535/16847/14725/26921/215999/245049/54003/18189/18575/18576/18754/19275/19276/235442/56508/19726/74370/12394/20502/207227/21416/21844	34
GO:0048639	BP	GO:0048639	positive regulation of developmental growth	23/1145	218/23355	0.000467301	0.010911	0.00937152	100705/238161/50769/12561/244667/13383/13508/13640/13869/15364/20403/17919/83814/211323/18261/18795/102502/19090/319757/20980/21388/106628/56449	23
GO:0048675	BP	GO:0048675	axon extension	17/1145	139/23355	0.000469288	0.010911	0.00937152	319974/12561/213084/13175/239667/244667/13430/12934/13508/17919/211323/18261/243743/20564/319757/214585/21960	17
GO:0048839	BP	GO:0048839	inner ear development	23/1145	218/23355	0.000467301	0.010911	0.00937152	109934/110789/11941/50769/12614/13844/14402/433899/241226/16535/320398/171166/667663/329421/11994/102502/26564/110253/109181/72747/76260/22283/21417	23
GO:0051648	BP	GO:0051648	vesicle localization	20/1145	178/23355	0.00047936	0.0110392	0.0094817	67774/100503185/13430/103967/12934/210998/66725/50791/71602/231646/17919/17922/245049/192167/18189/110380/214585/21416/109181/77573	20
GO:1901653	BP	GO:1901653	cellular response to peptide	29/1145	303/23355	0.000479371	0.0110392	0.0094817	23797/101772/66898/74741/12286/14158/14347/14360/108071/79221/16867/68421/14245/64898/109241/18053/74143/237542/18576/18604/18795/18750/18751/19090/235442/104215/20411/20660/22084	29
GO:0032869	BP	GO:0032869	cellular response to insulin stimulus	22/1145	205/23355	0.000486915	0.0111598	0.00958528	23797/66898/74741/14158/14347/79221/68421/14245/64898/74143/237542/18576/18604/18795/18750/18751/19090/235442/104215/20411/20660/22084	22
GO:0030072	BP	GO:0030072	peptide hormone secretion	28/1145	289/23355	0.00049015	0.011181	0.00960343	101772/12163/12288/12289/12290/12638/13640/15364/545156/16535/16847/26921/215999/245049/18189/18575/18576/18754/19275/19276/235442/56508/19726/74370/20502/207227/21416/21844	28
GO:0007214	BP	GO:0007214	gamma-aminobutyric acid signaling pathway	7/1145	30/23355	0.000503781	0.0113845	0.00977826	12286/242425/14402/14405/14407/227120/224860	7
GO:0021952	BP	GO:0021952	central nervous system projection neuron axonogenesis	7/1145	30/23355	0.000503781	0.0113845	0.00977826	110532/13176/13175/270190/13844/243743/230676	7
GO:0006858	BP	GO:0006858	extracellular transport	8/1145	39/23355	0.000514915	0.0114099	0.00980007	100048534/13411/16348/75050/19726/66722/74362/209012	8
GO:0015012	BP	GO:0015012	heparan sulfate proteoglycan biosynthetic process	6/1145	22/23355	0.000519061	0.0114099	0.00980007	23908/50787/15450/83398/235534/21416	6
GO:0060088	BP	GO:0060088	auditory receptor cell stereocilium organization	6/1145	22/23355	0.000519061	0.0114099	0.00980007	11941/667663/329421/11994/102502/110253	6
GO:0097107	BP	GO:0097107	postsynaptic density assembly	6/1145	22/23355	0.000519061	0.0114099	0.00980007	14804/16180/18189/19699/210274/217692	6
GO:0097553	BP	GO:0097553	calcium ion transmembrane import into cytosol	17/1145	140/23355	0.00051025	0.0114099	0.00980007	238161/109676/12288/13367/13405/270028/14360/14811/14873/16439/16867/233571/238871/234779/18754/20191/20541	17
GO:1903514	BP	GO:1903514	release of sequestered calcium ion into cytosol by endoplasmic reticulum	6/1145	22/23355	0.000519061	0.0114099	0.00980007	109676/13405/14873/238871/20191/20541	6
GO:0018210	BP	GO:0018210	peptidyl-threonine modification	16/1145	128/23355	0.000534069	0.0116867	0.0100378	23797/13548/270049/15275/231876/66725/26409/667663/329421/93742/108099/18750/18751/19090/74370/56480	16
GO:0001655	BP	GO:0001655	urogenital system development	34/1145	379/23355	0.000538967	0.0116881	0.010039	108154/11764/83675/12359/12505/12829/13123/13383/110350/13844/13869/13982/14118/231470/23908/16348/241226/269152/67703/100503085/14725/66725/14013/71602/18027/18514/241035/74055/218772/268902/20317/319757/240725/76260	34
GO:0030073	BP	GO:0030073	insulin secretion	24/1145	234/23355	0.000536978	0.0116881	0.010039	101772/12163/12288/12289/12290/12638/13640/16535/16847/26921/215999/245049/18189/18575/18576/18754/19275/19276/56508/19726/74370/207227/21416/21844	24
GO:0050769	BP	GO:0050769	positive regulation of neurogenesis	28/1145	291/23355	0.000546817	0.0118054	0.0101398	20238/12561/213084/244667/13508/13640/13844/108071/331461/76527/545156/14725/17919/211323/18212/18261/74143/18845/243743/54712/19699/268902/20317/319757/29819/23966/21844/24001	28
GO:0006639	BP	GO:0006639	acylglycerol metabolic process	17/1145	141/23355	0.00055425	0.0118367	0.0101667	76192/66082/14081/11813/12359/264064/217480/110197/320127/13982/15450/14245/64898/74055/18947/20660/21416	17
GO:0051645	BP	GO:0051645	Golgi localization	5/1145	15/23355	0.000558059	0.0118367	0.0101667	71435/13131/320191/70573/78610	5
GO:0055119	BP	GO:0055119	relaxation of cardiac muscle	5/1145	15/23355	0.000558059	0.0118367	0.0101667	238161/18578/238871/242202/22138	5
GO:0098917	BP	GO:0098917	retrograde trans-synaptic signaling	5/1145	15/23355	0.000558059	0.0118367	0.0101667	66082/223254/192167/18795/23964	5
GO:0045055	BP	GO:0045055	regulated exocytosis	26/1145	263/23355	0.000565999	0.0119527	0.0102663	109934/11784/12286/12288/27062/320405/27278/320127/238988/14158/14823/16510/66725/192167/110784/18191/18750/18751/18754/56508/242662/20908/78808/207227/20980/208898	26
GO:0043583	BP	GO:0043583	ear development	25/1145	249/23355	0.000570577	0.011997	0.0103043	109934/110789/11941/50769/12614/13844/14402/433899/241226/16535/320398/171166/667663/329421/11994/102502/26564/110380/110253/109181/72747/76260/22283/213081/21417	25
GO:0003015	BP	GO:0003015	heart process	24/1145	236/23355	0.000606746	0.0124861	0.0107244	238161/109676/12288/12289/12290/216033/13383/13405/14360/16535/26399/83814/18578/238871/242202/18750/19165/20112/20191/24052/244431/20541/435766/22138	24
GO:0042472	BP	GO:0042472	inner ear morphogenesis	15/1145	117/23355	0.000601985	0.0124861	0.0107244	109934/11941/50769/12614/13844/241226/320398/667663/329421/11994/102502/26564/110253/72747/21417	15
GO:0071559	BP	GO:0071559	response to transforming growth factor beta	23/1145	222/23355	0.000603189	0.0124861	0.0107244	12163/235505/12827/13132/13430/14118/53618/14360/241226/16420/52662/26409/19017/70673/12394/170441/102141/20678/72789/278507/80707/21417/11906	23
GO:0071900	BP	GO:0071900	regulation of protein serine/threonine kinase activity	37/1145	427/23355	0.000606016	0.0124861	0.0107244	14081/108909/238161/11682/12449/214444/13132/13844/14254/404194/108071/76527/29875/16706/66725/23938/26399/26408/104443/18189/242202/74055/108099/18750/26564/74370/20541/20660/70834/118449/330177/23963/83383/21844/665113/22084/78610	37
GO:0098656	BP	GO:0098656	anion transmembrane transport	37/1145	427/23355	0.000606016	0.0124861	0.0107244	18671/14081/101772/243634/24115/74741/12638/68897/13853/13869/13982/14402/14405/14407/14658/108071/15275/68421/14725/433926/231549/237542/56273/18750/18751/104215/94279/114644/27411/20502/217593/170441/268706/242773/74087/20411/22084	37
GO:0021533	BP	GO:0021533	cell differentiation in hindbrain	7/1145	31/23355	0.000623434	0.0127212	0.0109264	67269/11941/12286/14804/18189/19883/73668	7
GO:1902473	BP	GO:1902473	regulation of protein localization to synapse	7/1145	31/23355	0.000623434	0.0127212	0.0109264	13383/23888/545156/50791/192167/56508/665113	7
GO:0002791	BP	GO:0002791	regulation of peptide secretion	31/1145	338/23355	0.00064375	0.0130806	0.011235	101772/225372/12163/12289/12290/12638/13640/209630/15364/15932/545156/16535/16847/102635496/26921/215999/77579/245049/18189/18575/18576/18754/235442/56508/19726/74370/78808/207227/21416/21844/22138	31
GO:0046879	BP	GO:0046879	hormone secretion	33/1145	368/23355	0.00065004	0.0131531	0.0112973	101772/12163/12288/12289/12290/12638/13132/13640/14683/15364/545156/16535/16847/14725/26921/215999/245049/54003/18189/18575/18576/18754/19275/19276/235442/56508/19726/74370/12394/20502/207227/21416/21844	33
GO:0060401	BP	GO:0060401	cytosolic calcium ion transport	20/1145	183/23355	0.000683698	0.0137765	0.0118328	238161/109676/12288/13367/13405/270028/14360/14811/14873/16439/16867/215999/74143/233571/238871/234779/18754/19165/20191/20541	20
GO:0021575	BP	GO:0021575	hindbrain morphogenesis	10/1145	61/23355	0.000710972	0.0142667	0.0122538	67269/11941/12286/13131/14804/18189/71137/19883/319757/73668	10
GO:0018107	BP	GO:0018107	peptidyl-threonine phosphorylation	15/1145	119/23355	0.000720569	0.0143995	0.0123678	23797/13548/15275/231876/66725/26409/667663/329421/93742/108099/18750/18751/19090/74370/56480	15
GO:0099054	BP	GO:0099054	presynapse assembly	9/1145	51/23355	0.000750309	0.0149321	0.0128253	244682/223254/23888/14804/16180/331461/320772/192167/18189	9
GO:0060047	BP	GO:0060047	heart contraction	23/1145	226/23355	0.000772255	0.0153058	0.0131463	238161/109676/12288/12289/12290/216033/13383/13405/16535/26399/83814/18578/238871/242202/18750/19165/20112/20191/24052/244431/20541/435766/22138	23
GO:0098696	BP	GO:0098696	regulation of neurotransmitter receptor localization to postsynaptic specialization membrane	5/1145	16/23355	0.000779101	0.015316	0.013155	23888/545156/50791/56508/665113	5
GO:0098885	BP	GO:0098885	modification of postsynaptic actin cytoskeleton	5/1145	16/23355	0.000779101	0.015316	0.013155	30785/545156/77579/21844/245880	5
GO:0006813	BP	GO:0006813	potassium ion transport	24/1145	241/23355	0.000816749	0.0159266	0.0136795	238161/100986/109676/12289/13383/13430/13483/15165/16497/16508/16510/170738/70357/80334/16522/16535/226922/16532/338370/83814/18798/94249/226999/331004	24
GO:0030336	BP	GO:0030336	negative regulation of cell migration	27/1145	284/23355	0.000816733	0.0159266	0.0136795	66082/109934/110532/56838/22240/223650/13869/170942/52662/77569/50791/23938/78771/260315/211323/18183/237542/18795/19017/19270/19274/19281/19273/20317/117600/240725/21388	27
GO:0050708	BP	GO:0050708	regulation of protein secretion	28/1145	299/23355	0.000835118	0.0162194	0.013931	101772/225372/12163/12289/12290/12638/13640/209630/15932/16535/16847/102635496/26921/215999/77579/245049/18189/18575/18576/18754/56508/19726/74370/78808/207227/21416/21844/22138	28
GO:0010842	BP	GO:0010842	retina layer formation	6/1145	24/23355	0.000860834	0.016652	0.0143025	50769/170788/270120/19274/330222/237979	6
GO:0099084	BP	GO:0099084	postsynaptic specialization organization	8/1145	42/23355	0.00086727	0.0167096	0.0143521	14804/16180/192167/18189/19699/210274/217692/81907	8
GO:0009582	BP	GO:0009582	detection of abiotic stimulus	16/1145	134/23355	0.00088498	0.0169832	0.014587	110789/101772/11418/11941/50769/24115/170788/270190/14151/14360/14823/18053/11994/667742/171395/22138	16
GO:0060999	BP	GO:0060999	positive regulation of dendritic spine development	10/1145	63/23355	0.000922376	0.0175615	0.0150837	545156/192167/211323/74143/243725/19699/210274/29819/21844/22084	10
GO:0097479	BP	GO:0097479	synaptic vesicle localization	10/1145	63/23355	0.000922376	0.0175615	0.0150837	67774/100503185/13430/103967/12934/66725/50791/192167/18189/214585	10
GO:0021697	BP	GO:0021697	cerebellar cortex formation	7/1145	33/23355	0.000929786	0.0176331	0.0151453	67269/11941/12286/14804/18189/19883/73668	7
GO:0099541	BP	GO:0099541	trans-synaptic signaling by lipid	4/1145	10/23355	0.000951252	0.0178304	0.0153147	66082/108071/18189/18795	4
GO:0099542	BP	GO:0099542	trans-synaptic signaling by endocannabinoid	4/1145	10/23355	0.000951252	0.0178304	0.0153147	66082/108071/18189/18795	4
GO:2001225	BP	GO:2001225	regulation of chloride transport	4/1145	10/23355	0.000951252	0.0178304	0.0153147	18671/12638/108071/19092	4
GO:0009581	BP	GO:0009581	detection of external stimulus	16/1145	135/23355	0.00095927	0.0179113	0.0153842	110789/101772/11418/11941/50769/24115/170788/270190/14151/14360/14823/18053/11994/667742/171395/22138	16
GO:0090257	BP	GO:0090257	regulation of muscle system process	24/1145	244/23355	0.000970911	0.0180589	0.015511	238161/109676/71544/12288/76469/216033/13383/13405/238130/68813/57080/16468/16535/18018/18578/238871/242202/18585/18750/20191/20541/435766/106628/22138	24
GO:0042593	BP	GO:0042593	glucose homeostasis	26/1145	273/23355	0.000984537	0.0181599	0.0155977	101772/12286/12288/12289/12290/12638/94109/13640/14118/15275/16847/26921/109241/215999/20602/18053/18189/18575/18576/18604/18754/19275/19276/207227/21416/21844	26
GO:0051651	BP	GO:0051651	maintenance of location in cell	22/1145	216/23355	0.000983378	0.0181599	0.0155977	238161/100986/109676/71435/12021/13367/13405/14873/15275/16439/16867/233571/238871/234779/18754/20191/22785/20541/20660/209361/70573/78610	22
GO:0140029	BP	GO:0140029	exocytic process	13/1145	98/23355	0.000987605	0.0181599	0.0155977	27062/320405/12638/238988/192167/18189/235442/20908/78808/20980/208898/77573/22365	13
GO:0001952	BP	GO:0001952	regulation of cell-matrix adhesion	15/1145	123/23355	0.00101798	0.0185772	0.0159561	230379/12053/56838/12554/12571/244667/13405/13640/29875/77569/26921/83436/74030/78473/22288	15
GO:0022037	BP	GO:0022037	metencephalon development	15/1145	123/23355	0.00101798	0.0185772	0.0159561	67269/11941/12286/12805/13131/14402/14804/77579/78286/18189/71137/19883/56747/319757/73668	15
GO:0033500	BP	GO:0033500	carbohydrate homeostasis	26/1145	274/23355	0.00103837	0.0188779	0.0162144	101772/12286/12288/12289/12290/12638/94109/13640/14118/15275/16847/26921/109241/215999/20602/18053/18189/18575/18576/18604/18754/19275/19276/207227/21416/21844	26
GO:1900452	BP	GO:1900452	regulation of long-term synaptic depression	5/1145	17/23355	0.00105943	0.0191887	0.0164814	320127/14804/243725/66673/29819	5
GO:1901379	BP	GO:1901379	regulation of potassium ion transmembrane transport	12/1145	87/23355	0.00107942	0.0194779	0.0167297	238161/100986/109676/12289/13383/13430/13483/16497/70357/80334/16535/83814	12
GO:0071560	BP	GO:0071560	cellular response to transforming growth factor beta stimulus	22/1145	218/23355	0.00110976	0.019951	0.0171361	12163/235505/12827/13132/13430/14118/53618/14360/241226/16420/52662/26409/19017/70673/12394/170441/102141/20678/72789/278507/80707/21417	22
GO:0099563	BP	GO:0099563	modification of synaptic structure	7/1145	34/23355	0.00112187	0.020094	0.0172589	30785/70598/545156/77579/17919/21844/245880	7
GO:0050796	BP	GO:0050796	regulation of insulin secretion	20/1145	191/23355	0.00116655	0.0208171	0.01788	101772/12163/12289/12290/12638/13640/16535/16847/26921/215999/245049/18189/18575/18576/18754/19726/74370/207227/21416/21844	20
GO:0016311	BP	GO:0016311	dephosphorylation	33/1145	381/23355	0.00117159	0.0208302	0.0178913	215821/100072/76469/23859/13853/223254/70567/433899/234515/212111/29875/14245/50791/74302/272031/75769/320472/319468/72930/26932/243819/19250/19263/19270/19274/19275/19276/19281/19273/235534/241919/68188/243274	33
GO:0009100	BP	GO:0009100	glycoprotein metabolic process	30/1145	336/23355	0.00119659	0.0210427	0.0180737	230379/239337/102580/66967/14347/53618/14348/108150/270049/23908/50787/15932/15450/71738/67569/83398/69352/18795/235534/170441/94229/72902/20447/20449/240725/21416/278279/109181/80286/268880	30
GO:0072001	BP	GO:0072001	renal system development	30/1145	336/23355	0.00119659	0.0210427	0.0180737	108154/11764/83675/12359/12505/12829/13383/110350/13869/14118/231470/23908/16348/241226/269152/67703/100503085/14725/66725/14013/71602/18027/18514/241035/74055/218772/268902/319757/240725/76260	30
GO:0086002	BP	GO:0086002	cardiac muscle cell action potential involved in contraction	8/1145	44/23355	0.00119422	0.0210427	0.0180737	109676/12288/12289/216033/13383/16535/83814/20191	8
GO:0046434	BP	GO:0046434	organophosphate catabolic process	17/1145	151/23355	0.00120544	0.0211214	0.0181414	76192/66082/11813/232449/99586/14198/234515/212111/15450/18573/238871/242202/18585/18795/234779/18947/76654	17
GO:0042471	BP	GO:0042471	ear morphogenesis	16/1145	138/23355	0.00121464	0.0212058	0.0182138	109934/11941/50769/12614/13844/241226/320398/667663/329421/11994/102502/26564/110253/72747/213081/21417	16
GO:1903305	BP	GO:1903305	regulation of regulated secretory pathway	19/1145	178/23355	0.00121996	0.0212221	0.0182278	109934/11784/12286/27062/320127/14158/14823/16510/66725/192167/110784/18191/18750/18751/18754/242662/78808/207227/20980	19
GO:0050954	BP	GO:0050954	sensory perception of mechanical stimulus	28/1145	307/23355	0.00124807	0.0216331	0.0185809	110789/11418/11941/12289/244682/13367/225055/14360/14402/14823/433899/269629/14725/171166/71960/667663/329421/17922/78286/246190/628870/11994/667742/192190/20273/21872/110253/22283	28
GO:0048747	BP	GO:0048747	muscle fiber development	11/1145	77/23355	0.001284	0.0221765	0.0190476	13405/227325/26903/79221/74376/226101/24052/20541/319757/22138/278507	11
GO:0007162	BP	GO:0007162	negative regulation of cell adhesion	27/1145	293/23355	0.00129909	0.0223573	0.0192029	230379/12053/12400/56838/12505/12554/235431/13131/13383/13508/114873/13640/83964/17120/23938/94212/58205/18576/242202/18845/243743/54712/27205/12394/74392/20745/21960	27
GO:0008286	BP	GO:0008286	insulin receptor signaling pathway	15/1145	126/23355	0.00130381	0.0223589	0.0192043	66898/74741/14158/14347/68421/74143/237542/18604/18795/18750/18751/104215/20411/20660/22084	15
GO:0090276	BP	GO:0090276	regulation of peptide hormone secretion	23/1145	235/23355	0.0013089	0.022367	0.0192112	101772/12163/12289/12290/12638/13640/15364/545156/16535/16847/26921/215999/245049/18189/18575/18576/18754/235442/19726/74370/207227/21416/21844	23
GO:0009187	BP	GO:0009187	cyclic nucleotide metabolic process	7/1145	35/23355	0.00134374	0.0228814	0.019653	11513/11941/18573/238871/242202/18585/19883	7
GO:0002093	BP	GO:0002093	auditory receptor cell morphogenesis	6/1145	26/23355	0.00135397	0.0228944	0.0196642	11941/667663/329421/11994/102502/110253	6
GO:2000311	BP	GO:2000311	regulation of AMPA receptor activity	6/1145	26/23355	0.00135397	0.0228944	0.0196642	269994/192167/18189/19699/210274/380702	6
GO:0071692	BP	GO:0071692	protein localization to extracellular region	34/1145	400/23355	0.0013691	0.0230696	0.0198147	101772/225372/12163/12288/12289/12290/12638/13640/14118/209630/15932/16535/16847/17101/102635496/26921/215999/77579/245049/18189/18575/18576/18754/19275/19276/235442/56508/19726/74370/78808/207227/21416/21844/22138	34
GO:0009886	BP	GO:0009886	post-embryonic animal morphogenesis	5/1145	18/23355	0.0014081	0.0233205	0.0200302	170788/13508/14254/14683/433899	5
GO:0021702	BP	GO:0021702	cerebellar Purkinje cell differentiation	5/1145	18/23355	0.0014081	0.0233205	0.0200302	67269/11941/12286/19883/73668	5
GO:0035641	BP	GO:0035641	locomotory exploration behavior	5/1145	18/23355	0.0014081	0.0233205	0.0200302	66725/268890/18754/94229/21960	5
GO:1903115	BP	GO:1903115	regulation of actin filament-based movement	8/1145	45/23355	0.00139093	0.0233205	0.0200302	238161/109676/12288/216033/13383/18578/238871/20191	8
GO:1905244	BP	GO:1905244	regulation of modification of synaptic structure	5/1145	18/23355	0.0014081	0.0233205	0.0200302	30785/545156/77579/17919/21844	5
GO:0031032	BP	GO:0031032	actomyosin structure organization	21/1145	208/23355	0.00141443	0.0233453	0.0200515	268970/234094/72754/230837/73647/235431/13823/13824/225288/319710/77569/77579/71960/218194/320472/243725/20411/21872/21916/76260/22138	21
GO:0051657	BP	GO:0051657	maintenance of organelle location	4/1145	11/23355	0.00143699	0.0235568	0.0202332	100986/71435/70573/78610	4
GO:0097104	BP	GO:0097104	postsynaptic membrane assembly	4/1145	11/23355	0.00143699	0.0235568	0.0202332	13844/50791/192167/18189	4
GO:0046777	BP	GO:0046777	protein autophosphorylation	23/1145	237/23355	0.00146428	0.0239232	0.0205479	11682/69635/13548/270190/13869/14158/14254/14360/14773/15275/29875/231876/66725/17279/667663/329421/18212/26932/18750/19092/19886/330177/665113	23
GO:0055074	BP	GO:0055074	calcium ion homeostasis	40/1145	496/23355	0.00147946	0.0240899	0.020691	72244/238161/109676/224079/11941/12286/12288/12308/56838/13367/244667/13405/13982/270028/14360/14683/14811/14873/234515/16439/16510/16867/215999/233571/238871/241035/234779/18750/18751/18754/19165/229877/20191/24052/76775/94249/20541/240174/278279/26946	40
GO:0030705	BP	GO:0030705	cytoskeleton-dependent intracellular transport	20/1145	195/23355	0.00150168	0.0241267	0.0207226	78933/67269/71435/67774/23859/13518/110350/320191/245866/71602/231646/17919/17922/245049/56273/214585/29819/81907/73668/213081	20
GO:0031345	BP	GO:0031345	negative regulation of cell projection organization	21/1145	209/23355	0.00150165	0.0241267	0.0207226	231532/213084/13131/13132/239667/13430/103967/22240/13844/270120/14360/66725/26921/18053/192167/18189/235106/19270/20745/21960/22084	21
GO:0035176	BP	GO:0035176	social behavior	9/1145	56/23355	0.00150116	0.0241267	0.0207226	20238/66797/14402/14803/545156/18189/210274/22084/209012	9
GO:0061025	BP	GO:0061025	membrane fusion	17/1145	154/23355	0.00149681	0.0241267	0.0207226	74741/13430/103967/26903/209462/73456/226101/74143/235442/214585/100226/20908/55943/20980/78610/209018/53611	17
GO:2000146	BP	GO:2000146	negative regulation of cell motility	27/1145	297/23355	0.00158251	0.0253411	0.0217657	66082/109934/110532/56838/22240/223650/13869/170942/52662/77569/50791/23938/78771/260315/211323/18183/237542/18795/19017/19270/19274/19281/19273/20317/117600/240725/21388	27
GO:0055001	BP	GO:0055001	muscle cell development	21/1145	210/23355	0.00159342	0.0254278	0.0218402	238161/225638/109676/73647/13405/227325/26903/225288/79221/77579/74376/226101/18019/24052/20541/319757/69726/21916/106628/22138/278507	21
GO:0071320	BP	GO:0071320	cellular response to cAMP	7/1145	36/23355	0.00159844	0.0254278	0.0218402	238161/12638/15165/16439/16535/107746/20541	7
GO:0048814	BP	GO:0048814	regulation of dendrite morphogenesis	12/1145	91/23355	0.00160566	0.025459	0.0218669	210933/213084/331461/545156/17919/83814/74143/19699/217692/29819/21844/665113	12
GO:0045664	BP	GO:0045664	regulation of neuron differentiation	23/1145	239/23355	0.0016352	0.0258426	0.0221964	11682/12053/240843/214444/269784/13131/13405/12934/66725/17977/18053/192167/74143/18514/50779/20678/70834/21413/21844/21858/21417/11906/243937	23
GO:0030050	BP	GO:0030050	vesicle transport along actin filament	5/1145	19/23355	0.0018345	0.028804	0.02474	71602/231646/17919/17922/245049	5
GO:0046068	BP	GO:0046068	cGMP metabolic process	5/1145	19/23355	0.0018345	0.028804	0.02474	11941/18573/242202/18585/19883	5
GO:0006937	BP	GO:0006937	regulation of muscle contraction	17/1145	157/23355	0.00184547	0.0288825	0.0248075	238161/109676/71544/12288/216033/13383/13405/238130/68813/16535/18578/238871/242202/18750/20191/20541/435766	17
GO:0009306	BP	GO:0009306	protein secretion	33/1145	392/23355	0.00186736	0.0291307	0.0250206	101772/225372/12163/12288/12289/12290/12638/13640/209630/15932/16535/16847/17101/102635496/26921/215999/77579/245049/18189/18575/18576/18754/19275/19276/235442/56508/19726/74370/78808/207227/21416/21844/22138	33
GO:0051932	BP	GO:0051932	synaptic transmission, GABAergic	9/1145	58/23355	0.00193355	0.02997	0.0257415	13869/14402/14405/14407/14805/192167/227120/224860/18754	9
GO:0099172	BP	GO:0099172	presynapse organization	9/1145	58/23355	0.00193355	0.02997	0.0257415	244682/223254/23888/14804/16180/331461/320772/192167/18189	9
GO:0035592	BP	GO:0035592	establishment of protein localization to extracellular region	33/1145	393/23355	0.00194546	0.0300441	0.0258051	101772/225372/12163/12288/12289/12290/12638/13640/209630/15932/16535/16847/17101/102635496/26921/215999/77579/245049/18189/18575/18576/18754/19275/19276/235442/56508/19726/74370/78808/207227/21416/21844/22138	33
GO:0051279	BP	GO:0051279	regulation of release of sequestered calcium ion into cytosol	11/1145	81/23355	0.00195075	0.0300441	0.0258051	238161/109676/13367/13405/14873/16867/233571/238871/18754/20191/20541	11
GO:0071375	BP	GO:0071375	cellular response to peptide hormone stimulus	24/1145	257/23355	0.00196497	0.0301669	0.0259107	23797/66898/74741/14158/14347/79221/16867/68421/14245/64898/109241/74143/237542/18576/18604/18795/18750/18751/19090/235442/104215/20411/20660/22084	24
GO:0040013	BP	GO:0040013	negative regulation of locomotion	29/1145	332/23355	0.00198922	0.0304426	0.0261474	66082/109934/110532/56838/22240/223650/13869/170942/108071/52662/77569/50791/23938/78771/260315/211323/18183/237542/18795/19017/19270/19274/19281/19273/268902/20317/117600/240725/21388	29
GO:0002790	BP	GO:0002790	peptide secretion	36/1145	441/23355	0.00202466	0.03079	0.0264458	101772/225372/12163/12288/12289/12290/12638/13640/209630/15364/15932/545156/16535/16847/17101/102635496/26921/215999/77579/245049/18189/18575/18576/18754/19275/19276/235442/56508/19726/74370/20502/78808/207227/21416/21844/22138	36
GO:0030833	BP	GO:0030833	regulation of actin filament polymerization	18/1145	172/23355	0.00202015	0.03079	0.0264458	242894/73910/268970/545481/66898/13383/14158/225288/544963/57748/18613/243725/18754/66616/225115/23963/21916/245880	18
GO:0035725	BP	GO:0035725	sodium ion transmembrane transport	16/1145	145/23355	0.00204068	0.0308398	0.0264886	11418/241118/13405/13430/14167/14169/15165/338370/83814/18795/20273/94249/229706/20541/226999/331004	16
GO:0086005	BP	GO:0086005	ventricular cardiac muscle cell action potential	6/1145	28/23355	0.00203763	0.0308398	0.0264886	12288/216033/13383/16535/83814/20191	6
GO:0098911	BP	GO:0098911	regulation of ventricular cardiac muscle cell action potential	4/1145	12/23355	0.00207223	0.031219	0.0268142	12288/216033/13383/20191	4
GO:0046883	BP	GO:0046883	regulation of hormone secretion	27/1145	303/23355	0.00210688	0.0315445	0.0270939	101772/12163/12289/12290/12638/13132/13640/14683/15364/545156/16535/16847/26921/215999/245049/54003/18189/18575/18576/18754/235442/19726/74370/12394/207227/21416/21844	27
GO:0050885	BP	GO:0050885	neuromuscular process controlling balance	10/1145	70/23355	0.0021026	0.0315445	0.0270939	109934/382543/11941/12286/100072/77579/18189/11994/268859/21960	10
GO:2001259	BP	GO:2001259	positive regulation of cation channel activity	11/1145	82/23355	0.00215526	0.0321692	0.0276304	238161/109676/11418/13844/14169/14873/15165/83814/233571/234779/19699	11
GO:0007528	BP	GO:0007528	neuromuscular junction development	9/1145	59/23355	0.00218418	0.0322033	0.0276597	268566/545156/66725/18212/67533/210274/20411/208898/22288	9
GO:0031644	BP	GO:0031644	regulation of nervous system process	19/1145	187/23355	0.00216653	0.0322033	0.0276597	224997/244310/14167/14811/14245/66725/18053/192167/211323/18189/93742/56508/19699/210274/380702/23966/81907/21960/245880	19
GO:0051703	BP	GO:0051703	biological process involved in intraspecies interaction between organisms	9/1145	59/23355	0.00218418	0.0322033	0.0276597	20238/66797/14402/14803/545156/18189/210274/22084/209012	9
GO:0098900	BP	GO:0098900	regulation of action potential	9/1145	59/23355	0.00218418	0.0322033	0.0276597	109676/12288/216033/13383/14167/15165/70357/56508/20191	9
GO:0021680	BP	GO:0021680	cerebellar Purkinje cell layer development	7/1145	38/23355	0.00221922	0.0324642	0.0278838	67269/11941/12286/77579/19883/56747/73668	7
GO:0031532	BP	GO:0031532	actin cytoskeleton reorganization	13/1145	107/23355	0.00222201	0.0324642	0.0278838	69538/319974/66898/14158/544963/14245/215999/218194/217692/330267/210417/21872/665113	13
GO:0090287	BP	GO:0090287	regulation of cellular response to growth factor stimulus	26/1145	289/23355	0.00220945	0.0324642	0.0278838	239337/235505/50766/13132/13405/13430/76829/14118/241226/52662/14725/226101/18053/18189/70673/18751/170441/102141/20660/240725/21413/21416/81907/72789/278507/21417	26
GO:1990845	BP	GO:1990845	adaptive thermogenesis	17/1145	160/23355	0.00225992	0.0329186	0.0282741	66082/14081/12163/13592/26381/14683/333050/16847/14245/26399/227120/224860/19017/70673/20660/22229/329003	17
GO:0021694	BP	GO:0021694	cerebellar Purkinje cell layer formation	5/1145	20/23355	0.00234822	0.0338984	0.0291157	67269/11941/12286/19883/73668	5
GO:0071625	BP	GO:0071625	vocalization behavior	5/1145	20/23355	0.00234822	0.0338984	0.0291157	319974/66797/71960/18189/210274	5
GO:2000773	BP	GO:2000773	negative regulation of cellular senescence	5/1145	20/23355	0.00234822	0.0338984	0.0291157	23797/12053/12571/15364/19090	5
GO:0007605	BP	GO:0007605	sensory perception of sound	25/1145	276/23355	0.00242555	0.0344998	0.0296322	110789/11418/11941/12289/244682/13367/225055/14402/433899/269629/14725/171166/71960/667663/329421/17922/78286/246190/628870/11994/192190/20273/21872/110253/22283	25
GO:0034446	BP	GO:0034446	substrate adhesion-dependent cell spreading	13/1145	108/23355	0.00241534	0.0344998	0.0296322	69538/226255/13132/13430/330662/68813/13640/14158/72007/241226/56349/110253/22283	13
GO:0051271	BP	GO:0051271	negative regulation of cellular component movement	27/1145	306/23355	0.00242062	0.0344998	0.0296322	66082/109934/110532/56838/22240/223650/13869/170942/52662/77569/50791/23938/78771/260315/211323/18183/237542/18795/19017/19270/19274/19281/19273/20317/117600/240725/21388	27
GO:0055002	BP	GO:0055002	striated muscle cell development	15/1145	134/23355	0.0024116	0.0344998	0.0296322	73647/13405/227325/26903/225288/79221/77579/74376/226101/24052/20541/319757/21916/22138/278507	15
GO:0060402	BP	GO:0060402	calcium ion transport into cytosol	17/1145	161/23355	0.00241427	0.0344998	0.0296322	238161/109676/12288/13367/13405/270028/14360/14811/14873/16439/16867/233571/238871/234779/18754/20191/20541	17
GO:0035315	BP	GO:0035315	hair cell differentiation	9/1145	60/23355	0.00245998	0.0347405	0.029839	11941/433899/171166/667663/329421/11994/102502/110253/22283	9
GO:0070296	BP	GO:0070296	sarcoplasmic reticulum calcium ion transport	6/1145	29/23355	0.00246402	0.0347405	0.029839	109676/13405/14873/238871/20191/20541	6
GO:0090312	BP	GO:0090312	positive regulation of protein deacetylation	6/1145	29/23355	0.00246402	0.0347405	0.029839	80748/12053/13548/14245/66725/20602	6
GO:0007043	BP	GO:0007043	cell-cell junction assembly	16/1145	148/23355	0.00251645	0.0351721	0.0302096	215654/104010/12563/58187/56173/74987/18163/13383/13823/83964/83814/93742/18613/227937/18750/21872	16
GO:0030010	BP	GO:0030010	establishment of cell polarity	16/1145	148/23355	0.00251645	0.0351721	0.0302096	225638/214444/170788/94176/270190/209630/232288/83964/269152/16772/93742/241035/74206/22084/76260/338362	16
GO:0071326	BP	GO:0071326	cellular response to monosaccharide stimulus	16/1145	148/23355	0.00251645	0.0351721	0.0302096	101772/12289/12290/12638/13640/16847/26921/18189/18575/18576/18795/18754/19275/19276/21416/21844	16
GO:0002691	BP	GO:0002691	regulation of cellular extravasation	7/1145	39/23355	0.00259204	0.0361242	0.0310274	109934/56838/14347/14348/83964/18613/18795	7
GO:0043266	BP	GO:0043266	regulation of potassium ion transport	13/1145	109/23355	0.00262223	0.03644	0.0312986	238161/100986/109676/12289/13383/13430/13483/16497/70357/80334/16535/83814/18798	13
GO:1901016	BP	GO:1901016	regulation of potassium ion transmembrane transporter activity	9/1145	61/23355	0.00276269	0.0382818	0.0328806	238161/100986/109676/12289/13383/13430/16497/16535/83814	9
GO:0048489	BP	GO:0048489	synaptic vesicle transport	8/1145	50/23355	0.00279181	0.0385748	0.0331322	67774/100503185/13430/103967/12934/66725/192167/214585	8
GO:0048167	BP	GO:0048167	regulation of synaptic plasticity	31/1145	371/23355	0.00282022	0.0388563	0.033374	66082/11941/12308/18163/320127/13844/238988/14169/14799/14804/14805/14811/108071/545156/192167/18212/243725/19165/19699/242662/210274/380702/217692/94229/81840/66673/214585/29819/20908/21960/208898	31
GO:0018410	BP	GO:0018410	C-terminal protein amino acid modification	4/1145	13/23355	0.00287781	0.0393138	0.033767	244071/78933/67269/30949	4
GO:0099532	BP	GO:0099532	synaptic vesicle endosomal processing	4/1145	13/23355	0.00287781	0.0393138	0.033767	100503185/20403/100226/53611	4
GO:1901841	BP	GO:1901841	regulation of high voltage-gated calcium channel activity	4/1145	13/23355	0.00287781	0.0393138	0.033767	26903/14169/70729/18578	4
GO:0001678	BP	GO:0001678	cellular glucose homeostasis	17/1145	164/23355	0.002931	0.0398156	0.0341979	101772/12289/12290/12638/13640/15275/16847/26921/18053/18189/18575/18576/18754/19275/19276/21416/21844	17
GO:0010977	BP	GO:0010977	negative regulation of neuron projection development	17/1145	164/23355	0.002931	0.0398156	0.0341979	213084/13131/13132/239667/103967/22240/13844/270120/66725/26921/18053/192167/235106/19270/20745/21960/22084	17
GO:0048791	BP	GO:0048791	calcium ion-regulated exocytosis of neurotransmitter	5/1145	21/23355	0.00295899	0.0399712	0.0343316	12286/27062/242662/20980/208898	5
GO:0099515	BP	GO:0099515	actin filament-based transport	5/1145	21/23355	0.00295899	0.0399712	0.0343316	71602/231646/17919/17922/245049	5
GO:0044782	BP	GO:0044782	cilium organization	30/1145	357/23355	0.00300551	0.0404865	0.0347742	239273/68146/100503572/71276/382090/100048534/244667/13417/13430/110350/226265/244653/245866/380614/75050/102747/11994/241035/19726/71137/26942/66722/74362/74569/73668/72747/76260/239591/209012/213081	30
GO:0051403	BP	GO:0051403	stress-activated MAPK cascade	22/1145	236/23355	0.00302254	0.0406028	0.0348741	108909/13132/13383/270190/14167/14169/26408/26409/26921/26414/14013/18795/107746/26564/59009/237353/19261/70834/56274/330177/665113/209012	22
GO:0031641	BP	GO:0031641	regulation of myelination	9/1145	62/23355	0.0030941	0.0412206	0.0354047	13383/14245/18053/211323/93742/218772/21416/23966/245880	9
GO:0050982	BP	GO:0050982	detection of mechanical stimulus	9/1145	62/23355	0.0030941	0.0412206	0.0354047	110789/11418/11941/14360/14823/11994/667742/171395/22138	9
GO:0051209	BP	GO:0051209	release of sequestered calcium ion into cytosol	13/1145	111/23355	0.00307956	0.0412206	0.0354047	238161/109676/13367/13405/14873/16439/16867/233571/238871/234779/18754/20191/20541	13
GO:0031098	BP	GO:0031098	stress-activated protein kinase signaling cascade	23/1145	252/23355	0.00321644	0.0427326	0.0367035	108909/13132/13383/270190/14167/14169/404194/26408/26409/26921/26414/14013/18795/107746/26564/59009/237353/19261/70834/56274/330177/665113/209012	23
GO:0090101	BP	GO:0090101	negative regulation of transmembrane receptor protein serine/threonine kinase signaling pathway	14/1145	125/23355	0.00329575	0.0436664	0.0375055	235505/50766/13430/14118/52662/14725/50791/70673/170441/102141/20660/21416/72789/278507	14
GO:0051283	BP	GO:0051283	negative regulation of sequestering of calcium ion	13/1145	112/23355	0.00333146	0.0440189	0.0378083	238161/109676/13367/13405/14873/16439/16867/233571/238871/234779/18754/20191/20541	13
GO:0045860	BP	GO:0045860	positive regulation of protein kinase activity	35/1145	439/23355	0.00339522	0.0447392	0.0384269	14081/238161/11682/13131/13132/13383/14118/14254/404194/108071/76527/29875/16706/66725/23938/26399/26408/26921/211323/18189/237542/242202/74055/243725/108099/19699/26564/74370/66616/70834/56274/330177/23963/21844/665113	35
GO:0048512	BP	GO:0048512	circadian behavior	9/1145	63/23355	0.00345606	0.0454171	0.0390091	382543/224671/14402/16508/16847/26414/17978/192167/11906	9
GO:0010737	BP	GO:0010737	protein kinase A signaling	7/1145	41/23355	0.00348013	0.0454862	0.0390685	110789/238161/14118/66725/18189/23984/22138	7
GO:1901021	BP	GO:1901021	positive regulation of calcium ion transmembrane transporter activity	7/1145	41/23355	0.00348013	0.0454862	0.0390685	238161/109676/14169/14873/233571/234779/20191	7
GO:0018200	BP	GO:0018200	peptidyl-glutamic acid modification	6/1145	31/23355	0.00351344	0.0457978	0.0393361	244071/78933/67269/102747/74410/239591	6
GO:0045123	BP	GO:0045123	cellular extravasation	10/1145	75/23355	0.00352668	0.0458468	0.0393783	109934/56838/14158/14347/14348/83964/18613/18795/19261/381485	10
GO:0043406	BP	GO:0043406	positive regulation of MAP kinase activity	20/1145	210/23355	0.00357887	0.0464006	0.0398539	11682/13132/14254/404194/108071/76527/29875/16706/66725/23938/26399/26408/242202/74055/26564/70834/330177/23963/21844/665113	20
GO:1903076	BP	GO:1903076	regulation of protein localization to plasma membrane	13/1145	113/23355	0.00359984	0.0465476	0.0399802	13132/13383/13483/13844/13853/545156/17919/18189/102502/104215/20411/20908/55943	13
GO:0098901	BP	GO:0098901	regulation of cardiac muscle cell action potential	5/1145	22/23355	0.00367662	0.0474137	0.040724	109676/12288/216033/13383/20191	5
GO:0007018	BP	GO:0007018	microtubule-based movement	32/1145	394/23355	0.00375525	0.0482989	0.0414843	78933/67269/71435/67774/12290/76856/100048534/23859/13411/110083/240960/330355/13417/237806/13518/110350/67068/226265/244653/245866/16348/75050/56273/19726/66722/74362/214585/29819/81907/73668/209012/213081	32
GO:0010882	BP	GO:0010882	regulation of cardiac muscle contraction by calcium ion signaling	4/1145	14/23355	0.00387388	0.0492742	0.0423221	109676/13405/20191/20541	4
GO:0032868	BP	GO:0032868	response to insulin	22/1145	241/23355	0.00389222	0.0492742	0.0423221	23797/66898/74741/14158/14347/79221/68421/14245/64898/74143/237542/18576/18604/18795/18750/18751/19090/235442/104215/20411/20660/22084	22
GO:0045176	BP	GO:0045176	apical protein localization	4/1145	14/23355	0.00387388	0.0492742	0.0423221	12614/15165/83964/110380	4
GO:0051282	BP	GO:0051282	regulation of sequestering of calcium ion	13/1145	114/23355	0.00388548	0.0492742	0.0423221	238161/109676/13367/13405/14873/16439/16867/233571/238871/234779/18754/20191/20541	13
GO:0061337	BP	GO:0061337	cardiac conduction	9/1145	64/23355	0.00385044	0.0492742	0.0423221	109676/12288/12289/216033/16535/238871/20191/20541/435766	9
GO:0099151	BP	GO:0099151	regulation of postsynaptic density assembly	4/1145	14/23355	0.00387388	0.0492742	0.0423221	14804/16180/18189/217692	4
GO:0050767	BP	GO:0050767	regulation of neurogenesis	35/1145	443/23355	0.00391914	0.0494855	0.0425036	20238/12561/213084/13131/239667/244667/13508/13640/13844/108071/15364/320191/331461/76527/545156/14725/17919/211323/18212/18261/74143/18845/243743/54712/19699/268902/20317/319757/20660/29819/23966/21844/24001/21960/22084	35
GO:0048511	BP	GO:0048511	rhythmic process	26/1145	302/23355	0.00399899	0.0503623	0.0432566	382543/272322/224671/13123/99586/76843/13548/13982/50758/14402/14811/16508/16847/16867/26414/17978/18053/192167/18212/19017/19090/19092/19275/19883/12394/11906	26
GO:0043405	BP	GO:0043405	regulation of MAP kinase activity	25/1145	287/23355	0.00404989	0.0507488	0.0435886	108909/11682/13132/13844/14254/404194/108071/76527/29875/16706/66725/23938/26399/26408/242202/74055/18750/26564/20660/70834/330177/23963/21844/665113/22084	25
GO:1902476	BP	GO:1902476	chloride transmembrane transport	8/1145	53/23355	0.00405067	0.0507488	0.0435886	101772/243634/24115/12638/14402/14405/14407/14658	8
GO:0003279	BP	GO:0003279	cardiac septum development	14/1145	128/23355	0.00408877	0.0510938	0.0438849	108154/13411/13430/14725/77579/18018/218772/268902/20564/319757/24069/21388/109181/22761	14
GO:0060117	BP	GO:0060117	auditory receptor cell development	6/1145	32/23355	0.00414779	0.0516977	0.0444036	11941/667663/329421/11994/102502/110253	6
GO:0048015	BP	GO:0048015	phosphatidylinositol-mediated signaling	17/1145	170/23355	0.00424148	0.0527295	0.0452899	12359/13869/14254/14360/16510/244281/211323/18212/18705/18795/18798/74055/227120/224860/19699/26564/22084	17
GO:0007622	BP	GO:0007622	rhythmic behavior	9/1145	65/23355	0.00427917	0.052791	0.0453427	382543/224671/14402/16508/16847/26414/17978/192167/11906	9
GO:0032271	BP	GO:0032271	regulation of protein polymerization	21/1145	228/23355	0.00426328	0.052791	0.0453427	242894/73910/268970/545481/66898/214444/13383/13548/14158/225288/544963/57748/260315/18613/243725/18754/66616/225115/23963/21916/245880	21
GO:0051057	BP	GO:0051057	positive regulation of small GTPase mediated signal transduction	10/1145	77/23355	0.00427515	0.052791	0.0453427	319974/320127/94176/26921/56349/18053/211323/19699/20662/20663	10
GO:0021511	BP	GO:0021511	spinal cord patterning	5/1145	23/23355	0.00451087	0.054821	0.0470863	380614/19699/71137/319757/24069	5
GO:0030326	BP	GO:0030326	embryonic limb morphogenesis	15/1145	143/23355	0.00449131	0.054821	0.0470863	16764/12288/110350/30838/231470/14683/245866/380614/14013/18514/19165/218772/26564/21388/213081	15
GO:0035113	BP	GO:0035113	embryonic appendage morphogenesis	15/1145	143/23355	0.00449131	0.054821	0.0470863	16764/12288/110350/30838/231470/14683/245866/380614/14013/18514/19165/218772/26564/21388/213081	15
GO:0042552	BP	GO:0042552	myelination	17/1145	171/23355	0.00450069	0.054821	0.0470863	66190/234094/13383/13823/14360/83964/14245/18053/211323/18212/93742/218772/218442/21416/23966/209012/245880	17
GO:0051208	BP	GO:0051208	sequestering of calcium ion	13/1145	116/23355	0.00451174	0.054821	0.0470863	238161/109676/13367/13405/14873/16439/16867/233571/238871/234779/18754/20191/20541	13
GO:0071902	BP	GO:0071902	positive regulation of protein serine/threonine kinase activity	24/1145	274/23355	0.00447521	0.054821	0.0470863	14081/238161/11682/13132/14254/404194/108071/76527/29875/16706/66725/23938/26399/26408/18189/242202/74055/26564/74370/70834/330177/23963/21844/665113	24
GO:0051656	BP	GO:0051656	establishment of organelle localization	32/1145	399/23355	0.00452877	0.0548901	0.0471456	78933/67269/71435/67774/100503185/214444/27278/13383/13430/103967/12934/78798/210998/14158/320191/66725/17120/17350/77579/71602/231646/17919/17922/245049/192167/93742/56273/241035/110380/214585/57752/109181	32
GO:0009953	BP	GO:0009953	dorsal/ventral pattern formation	12/1145	103/23355	0.00455954	0.0549873	0.0472291	108909/68146/68897/110350/245866/380614/19165/71137/319757/24069/73668/213081	12
GO:0042491	BP	GO:0042491	inner ear auditory receptor cell differentiation	8/1145	54/23355	0.00455512	0.0549873	0.0472291	11941/433899/171166/667663/329421/11994/102502/110253	8
GO:0006874	BP	GO:0006874	cellular calcium ion homeostasis	37/1145	480/23355	0.0046008	0.055073	0.0473027	72244/238161/109676/224079/11941/12286/12288/12308/56838/13367/244667/13405/13982/270028/14360/14811/14873/234515/16439/16510/16867/215999/233571/238871/241035/234779/18750/18751/18754/19165/229877/20191/76775/94249/20541/240174/26946	37
GO:0007389	BP	GO:0007389	pattern specification process	37/1145	480/23355	0.0046008	0.055073	0.0473027	108909/11764/68146/83675/207165/12614/12808/68897/13411/110350/13869/245866/380614/16348/14725/320772/17536/18183/18514/171395/18845/19090/19165/19699/19726/71137/268902/26564/27428/319757/24069/21388/73668/76260/22138/213081/21417	37
GO:0097484	BP	GO:0097484	dendrite extension	7/1145	43/23355	0.00458261	0.055073	0.0473027	319974/213084/20403/83814/70834/20980/81907	7
GO:0001822	BP	GO:0001822	kidney development	27/1145	321/23355	0.0046535	0.0555573	0.0477186	108154/11764/83675/12359/12505/12829/13383/110350/13869/14118/231470/23908/16348/241226/269152/67703/100503085/14725/66725/71602/18514/241035/74055/218772/268902/319757/240725	27
GO:0009101	BP	GO:0009101	glycoprotein biosynthetic process	24/1145	275/23355	0.00468221	0.0555573	0.0477186	230379/102580/14347/53618/14348/108150/270049/23908/50787/15450/67569/83398/69352/18795/235534/170441/94229/20447/20449/21416/278279/109181/80286/268880	24
GO:0019933	BP	GO:0019933	cAMP-mediated signaling	10/1145	78/23355	0.00469358	0.0555573	0.0477186	67252/14677/14683/16706/23984/54611/18576/238871/29863/56508	10
GO:0048592	BP	GO:0048592	eye morphogenesis	18/1145	186/23355	0.0046882	0.0555573	0.0477186	67269/50769/170788/13508/270190/13844/270120/14254/15165/18212/19274/218772/330222/237979/110380/29819/76260/21417	18
GO:1903959	BP	GO:1903959	regulation of anion transmembrane transport	14/1145	130/23355	0.0046987	0.0555573	0.0477186	18671/14081/74741/12638/13869/13982/108071/15275/68421/237542/18750/18751/104215/20411	14
GO:0048278	BP	GO:0048278	vesicle docking	9/1145	66/23355	0.00474424	0.0559589	0.0480636	12638/18189/235442/100226/20908/55943/208898/77573/22365	9
GO:0051494	BP	GO:0051494	negative regulation of cytoskeleton organization	17/1145	172/23355	0.00477275	0.0561582	0.0482348	268970/12449/214444/235431/13548/26903/78798/225288/260315/18613/213556/243725/110380/74392/225115/21872/21916	17
GO:0010959	BP	GO:0010959	regulation of metal ion transport	25/1145	291/23355	0.00483185	0.0567156	0.0487135	238161/109676/11941/24115/12286/12288/12289/13367/13383/13405/26903/14169/14360/14873/16867/107589/70729/233571/18578/238871/234779/18754/19165/20191/20541	25
GO:0006821	BP	GO:0006821	chloride transport	12/1145	104/23355	0.00493033	0.0577314	0.049586	18671/101772/243634/24115/12638/14402/14405/14407/14658/108071/233571/19092	12
GO:0032279	CC	GO:0032279	asymmetric synapse	72/1156	405/23177	2.87e-21	8e-19	5.45e-19	109934/100986/109676/77531/99371/11941/12288/67252/64085/18163/13131/13176/13175/320127/244667/13383/23859/224997/13430/103967/14000/13518/13823/13869/238988/14360/268566/14799/14802/14803/14804/14805/14811/74053/108071/269994/331461/269180/241226/545156/16508/16646/70530/241568/50791/26409/26414/17978/18053/192167/110784/18212/18578/68070/227937/18798/243725/56508/320119/20273/210274/380702/2176…	72
GO:0098984	CC	GO:0098984	neuron to neuron synapse	75/1156	433/23177	2.08e-21	8e-19	5.45e-19	109934/100986/109676/77531/99371/11941/12288/67252/64085/18163/13131/13176/13175/320127/244667/13383/23859/224997/13430/103967/14000/13518/13823/13869/238988/14360/268566/14799/14802/14803/14804/14805/110637/14811/74053/108071/269994/331461/269180/241226/545156/16508/16646/70530/241568/50791/26409/26414/17978/18053/192167/110784/18212/18578/68070/227937/18798/243725/56508/320119/20273/210274/3807…	75
GO:0014069	CC	GO:0014069	postsynaptic density	71/1156	400/23177	6e-21	1.11e-18	7.58e-19	109934/100986/109676/77531/11941/12288/67252/64085/18163/13131/13176/13175/320127/244667/13383/23859/224997/13430/103967/14000/13518/13823/13869/238988/14360/268566/14799/14802/14803/14804/14805/14811/74053/108071/269994/331461/269180/241226/545156/16508/16646/70530/241568/50791/26409/26414/17978/18053/192167/110784/18212/18578/68070/227937/18798/243725/56508/320119/20273/210274/380702/217692/205…	71
GO:0097060	CC	GO:0097060	synaptic membrane	77/1156	471/23177	2.19e-20	3.05e-18	2.07e-18	66082/100986/11733/109676/11941/12286/12288/12289/12290/320405/12308/64085/12805/244682/53870/66797/13176/217480/320127/13383/23859/224997/13405/13430/103967/13844/13869/238988/223254/242425/14402/14405/14407/14658/268566/14799/14802/14803/14804/14805/14807/110637/14811/74053/108071/14823/269994/230868/331461/241226/20403/16508/16510/16522/383348/70530/241568/50791/26422/192167/18189/18191/18212/…	77
GO:0099572	CC	GO:0099572	postsynaptic specialization	73/1156	439/23177	8.13e-20	9.05e-18	6.16e-18	109934/100986/109676/77531/11941/12288/67252/64085/18163/13131/13176/13175/320127/244667/13383/23859/224997/244310/13430/103967/14000/13518/13823/13869/238988/14360/14402/268566/14799/14802/14803/14804/14805/14811/74053/108071/269994/331461/269180/241226/545156/16508/16646/70530/241568/50791/26409/26414/17978/18053/192167/110784/18212/18578/68070/227937/18798/243725/56508/320119/20273/210274/3807…	73
GO:0045211	CC	GO:0045211	postsynaptic membrane	59/1156	331/23177	1.06e-17	9.86e-16	6.71e-16	66082/100986/11733/109676/11941/12288/12290/320405/64085/12805/13176/217480/320127/13383/23859/224997/13405/13430/103967/13844/13869/223254/242425/14402/14405/14407/14658/268566/14799/14802/14803/14804/14805/14807/110637/14811/74053/108071/269994/230868/331461/16508/16510/383348/70530/241568/50791/26422/192167/18212/20273/210274/380702/20541/81840/66673/16651/23964/21844	59
GO:0034702	CC	GO:0034702	ion channel complex	51/1156	297/23177	8.5e-15	6.76e-13	4.6e-13	76192/66082/238161/101772/243634/24115/12286/12288/12289/12290/12294/76856/12638/66797/13383/23859/13483/14402/14405/14407/14658/14799/14802/14804/14805/14807/110637/14811/15165/16497/16508/16510/70357/80334/16535/226922/433926/231549/215999/192167/70729/18578/238871/171395/20191/20273/210274/380702/78808/26946/329178	51
GO:1990351	CC	GO:1990351	transporter complex	53/1156	326/23177	2.59e-14	1.8e-12	1.23e-12	76192/66082/238161/101772/243634/11980/24115/12286/12288/12289/12290/12294/76856/12638/66797/13383/23859/13483/14402/14405/14407/14658/14799/14802/14804/14805/14807/110637/14811/15165/16497/16508/16510/70357/80334/16535/226922/433926/231549/215999/192167/70729/18578/238871/56273/171395/20191/20273/210274/380702/78808/26946/329178	53
GO:1902495	CC	GO:1902495	transmembrane transporter complex	51/1156	313/23177	7.31e-14	4.52e-12	3.08e-12	76192/66082/238161/101772/243634/24115/12286/12288/12289/12290/12294/76856/12638/66797/13383/23859/13483/14402/14405/14407/14658/14799/14802/14804/14805/14807/110637/14811/15165/16497/16508/16510/70357/80334/16535/226922/433926/231549/215999/192167/70729/18578/238871/171395/20191/20273/210274/380702/78808/26946/329178	51
GO:0043235	CC	GO:0043235	receptor complex	58/1156	414/23177	1.11e-12	6.19e-11	4.21e-11	76192/66082/110789/11682/272322/12505/12804/65969/13383/23859/13840/270190/13844/13869/14254/242425/14402/14405/14407/14585/404194/71862/14799/14802/14804/14805/14807/110637/14811/218624/319480/241226/104099/381924/16420/223272/16439/383348/16847/16867/231876/94217/14725/192167/110784/18212/18845/243743/54712/19263/19276/26564/19886/210274/380702/78473/20411/78808	58
GO:0099240	CC	GO:0099240	intrinsic component of synaptic membrane	41/1156	245/23177	8.6e-12	4.36e-10	2.96e-10	66082/11941/12286/12288/12289/12290/64085/12805/244682/53870/13176/23859/13844/13869/242425/14402/14407/268566/14799/14802/14803/14804/14805/110637/14811/108071/14823/269994/331461/16508/16510/16522/70530/241568/192167/18189/19165/20273/380702/20541/66673	41
GO:0015629	CC	GO:0015629	actin cytoskeleton	63/1156	500/23177	1.32e-11	6.14e-10	4.18e-10	242894/225372/71435/319974/66898/12308/12808/53419/235431/30785/69635/68511/22240/13518/13548/216565/14158/225288/70598/14254/23880/14360/14457/29875/83964/77113/77569/210126/110265/77579/71960/107589/244281/74376/71602/231646/667663/329421/17919/17922/245049/104443/18261/213556/102502/243725/18751/104215/110380/27428/217692/74206/66616/20411/74392/225115/118449/21916/110253/74569/22138/22288/330…	63
GO:0034703	CC	GO:0034703	cation channel complex	37/1156	223/23177	1.15e-10	4.92e-09	3.35e-09	76192/66082/238161/12286/12288/12289/12290/12294/76856/66797/23859/13483/14799/14802/14805/14807/110637/14811/15165/16497/16508/16510/70357/80334/16535/226922/215999/192167/70729/18578/238871/171395/20191/20273/380702/26946/329178	37
GO:0042734	CC	GO:0042734	presynaptic membrane	34/1156	198/23177	2.52e-10	1e-08	6.83e-09	11941/12286/12288/12289/12290/320405/12805/244682/53870/320127/13383/13844/13869/238988/242425/14799/14805/14807/110637/14811/14823/230868/20403/16510/16522/383348/18189/18191/19165/242662/20273/20908/78808/208898	34
GO:0098982	CC	GO:0098982	GABA-ergic synapse	24/1156	105/23177	2.76e-10	1.02e-08	6.97e-09	66082/11941/12290/12554/244682/13640/13869/238988/242425/14402/14407/14658/268566/14823/16508/50791/320772/110784/211323/100042150/18189/18191/18795/229706	24
GO:0099699	CC	GO:0099699	integral component of synaptic membrane	36/1156	226/23177	6.53e-10	2.27e-08	1.55e-08	66082/11941/12286/12288/12289/12290/64085/13176/13844/13869/242425/14402/14407/14799/14802/14803/14804/14805/110637/14811/108071/14823/269994/331461/16508/16510/16522/70530/241568/192167/18189/19165/20273/380702/20541/66673	36
GO:0060076	CC	GO:0060076	excitatory synapse	20/1156	78/23177	9.64e-10	3.16e-08	2.15e-08	11941/320405/12308/53870/66797/320127/14799/14804/14811/16510/16522/192167/235106/18212/18578/18798/56508/20273/380702/208898	20
GO:0031252	CC	GO:0031252	cell leading edge	50/1156	396/23177	1.63e-09	5.03e-08	3.42e-08	78618/11733/69538/73910/230837/74741/12289/12505/12571/66797/12808/216033/13367/13430/224897/22240/26903/13823/14158/232288/14405/14407/14457/14683/14799/15165/29875/544963/241226/57748/16510/77579/107589/18053/211323/18613/74055/213556/243725/19274/268902/59009/380702/71096/219140/77057/20908/21844/22283/245880	50
GO:0098839	CC	GO:0098839	postsynaptic density membrane	22/1156	97/23177	1.78e-09	5.21e-08	3.54e-08	100986/11941/64085/13176/320127/13383/23859/13869/14799/14802/14803/14804/14811/108071/269994/331461/70530/241568/20273/380702/66673/21844	22
GO:0098858	CC	GO:0098858	actin-based cell projection	35/1156	224/23177	1.91e-09	5.31e-08	3.61e-08	110789/69538/12308/12505/12638/170788/13383/13405/238130/270190/433899/544963/83964/15450/66725/666339/71602/231646/667663/329421/17922/192167/18261/11994/59020/192190/102502/27205/243725/219140/110253/22283/22288/80707/67263	35
GO:0150034	CC	GO:0150034	distal axon	48/1156	385/23177	5.21e-09	1.38e-07	9.41e-08	319974/12308/12808/13176/320127/244667/13430/12934/22240/13508/15572/238988/13982/14402/14802/14805/14807/110637/14811/15165/29875/231876/14725/66725/77579/71960/18189/18212/93742/243725/18750/18751/19165/19275/19276/56508/210274/94229/20541/319757/20908/66860/21844/21858/22084/208898/22283/22288	48
GO:0099634	CC	GO:0099634	postsynaptic specialization membrane	25/1156	136/23177	1.42e-08	3.6e-07	2.45e-07	100986/11941/64085/13176/320127/13383/23859/13869/14402/14799/14802/14803/14804/14811/108071/269994/331461/16508/70530/241568/192167/20273/380702/66673/21844	25
GO:0098936	CC	GO:0098936	intrinsic component of postsynaptic membrane	29/1156	178/23177	1.76e-08	4.27e-07	2.91e-07	66082/11941/12288/12290/64085/12805/13176/23859/13844/13869/242425/14402/14799/14802/14803/14804/110637/14811/108071/269994/331461/16508/70530/241568/192167/20273/380702/20541/66673	29
GO:0098862	CC	GO:0098862	cluster of actin-based cell projections	30/1156	201/23177	7.73e-08	1.79e-06	1.22e-06	18671/110789/16790/12308/65969/13131/13367/238130/433899/14725/77579/71960/71602/667663/329421/17919/17922/18261/11994/59020/192190/102502/18751/56508/210274/226999/21844/110253/22283/67263	30
GO:0099055	CC	GO:0099055	integral component of postsynaptic membrane	27/1156	169/23177	8.25e-08	1.84e-06	1.25e-06	66082/11941/12288/12290/64085/13176/13844/13869/242425/14402/14799/14802/14803/14804/110637/14811/108071/269994/331461/16508/70530/241568/192167/20273/380702/20541/66673	27
[truncated: 253 more rows]

## Sheet: Table S8
Supplementary Table S8 Gene Ontology enrichment analysis of 895 unique H3K27me3 peak binding genes for BaP-NTD.
[truncated: 25 more rows]

[truncated: 7 more sheets: Table S9, Table S10, Table S11, Table S12, Table S13, Table S14, Table S15]
