# Supplementary material for: Distinct H3K27me3 and H3K27ac Modifications in Neural Tube Defects Induced by Benzo[a]pyrene
Source: Brain Sci. 2023 Feb 15;13(2):334. doi: 10.3390/brainsci13020334 (PMC9954656; doi:10.3390/brainsci13020334)
Supplement: Supplementary file 1 [file brainsci-13-00334-s001.zip › Additional file S3.xlsx]

## Sheet: Table S16
Supplementary Table S16 Gene Ontology enrichment analysis of differentially H3K27me3 peak binding genes for BaP-NTD compared with BaP-nonNTD.
Term	Category	Observed	Expected	Fold change	P-value	Adjusted P-value	Term name	Gene list
GO:0005737	6448	999	301.791	3.31024	1.16887e-176	9.16977e-173	cellular_component:cytoplasm	Sorbs3;Capzb;Bbs9;Ap5s1;Syt2;Herc3;Actn4;Mettl22;Ntrk2;Steap3;Nek6;Tlr9;Neil1;Vash2;Asb14;Necab2;Dnah17;Cdk6;Nol4l;Sh3rf1;Mad1l1;Camk4;D430042O09Rik;Pla2g4e;Kit;Batf;Rbbp6;Nln;Sh3d19;Gp1ba;Dock3;Dock6;Magi1;Cmtr2;Rab11fip3;Kcnip4;Cryl1;Hlcs;Nlrp2;Dab2ip;Tns3;Gatsl2;Fas;Jakmip1;Dst;Slc31a1;Plxna1;Mtus2;Ttc7b;Gtse1;Runx2;Rcc2;Begain;Prss36;Capn9;Zfhx3;Ykt6;Pnpla3;Fancl;Exosc10;Pola2;Gars;Gm4858;Nel…
GO:0016020	6889	1016	322.432	3.15106	5.97357e-167	2.34313e-163	cellular_component:membrane	Scn5a;Pcdhgb1;Capzb;Bbs9;Ap5s1;Syt2;Bscl2;Serinc2;Ntrk2;Steap3;Grm4;Tlr9;Kcnh1;Gpr31b;Pitpnm3;Immp2l;Cd22;Slc47a1;Pla2g4e;Sorl1;Lect1;Kit;Atp7b;F2rl3;Mst1r;Gbf1;Tmcc1;Vcan;Pcdhga2;Xxylt1;Gp1ba;Gnaq;Cacng4;Magi1;Cmtr2;Ptprs;Rab11fip3;Pcdhgb6;Kcnip4;Tnfrsf26;Pcdhga11;Lamc2;Hs3st2;Dab2ip;Ptpru;Fas;Jakmip1;Arfgef3;Dst;Tecpr1;Slc31a1;Cadm1;Slc45a1;Plxna1;Ttc7b;Grik3;Fam173b;Sdk1;Vsir;Gtse1;Rcc2;Sdf4;T…
GO:0005515	4471	712	209.26	3.40247	1.22024e-136	3.19093e-133	molecular_function:protein binding	Sorbs3;Scn5a;Pcdhgb1;Capzb;Bbs9;Syt2;Actn4;Ntrk2;Steap3;Tlr9;Lgi3;Cd22;Dnah17;Cdk6;Sh3rf1;Camk4;Sorl1;Emsy;Zbtb16;Kit;Batf;Gbf1;Vgll4;Nid2;Sh3d19;Ehmt1;Gnaq;Dock3;Magi1;Ctbp2;Ptprs;Rab11fip3;Eed;Chrdl2;Lamc2;Dab2ip;Fas;Dst;Slc31a1;Tshz2;Cadm1;Plxna1;Grik3;Crtac1;Vsir;Runx2;Dlgap4;Fancl;Cacna1b;Pola2;Nr2c2;Gars;Phf10;Crip2;Smad4;Elmo1;Atrnl1;Ppargc1b;Tlr5;Eif4g3;Musk;Smyd3;Erg;Rptor;Syne1;Nfatc2;T…
GO:0005886	3628	607	169.804	3.5747	1.9409e-126	3.80658e-123	cellular_component:plasma membrane	Scn5a;Lingo1;C2cd4c;Scrib;Bbs9;Syt2;Slc36a2;Ppp5c;Mettl22;Ntrk2;Steap3;Grm4;Tlr9;Kcnh1;Gpr31b;Slc39a8;Cd22;Slc47a1;Gm8909;Cdon;Glrb;D430042O09Rik;Grid1;Fgd5;Zbtb16;Kit;9230019H11Rik;Atp7b;F2rl3;Mst1r;Nln;Sh3d19;Cystm1;Gp1ba;Gnaq;Cacng4;Atp6v0a4;Magi1;Dpp6;Fpr1;Kcnip4;Plce1;Cryl1;Klra9;Erbb2;Pi4ka;Rtn4rl2;Gpam;Dab2ip;Rgs12;Ptpru;Fas;Rab40b;Ctnna2;Arvcf;Pik3r5;Dst;Racgap1;Ggt1;Slc31a1;Gria1;Cnih3;C…
GO:0005634	5759	708	269.543	2.62667	5.83232e-91	9.15092e-88	cellular_component:nucleus	Sorbs3;Wdr33;Ap5s1;Herc3;Actn4;Mettl22;Nek6;Kcnh1;Neil1;Asb14;Pithd1;Mlip;Cdk6;Mad1l1;Ctdspl;Camk4;D430042O09Rik;Emsy;Zbtb16;Tfcp2;Batf;Rbbp6;Vgll4;Ehmt1;Gnaq;Magi1;Ctbp2;Cmtr2;Btbd7;Eed;Cryl1;Fas;Rfc4;Dst;Ankrd49;Tshz2;Plxna1;Mtus2;Zfp326;Zfp521;Ss18;Runx2;Rcc2;Zfhx3;Fancl;Exosc10;Pola2;Nr2c2;Phf10;Nab2;Gm4858;Nelfa;Smc6;Tfeb;Zfp64;Zfp821;Gpc6;Smad4;Mipol1;Csrnp3;Strip1;Ppargc1b;Camta1;Rnf43;Smy…
GO:0046872	2921	456	136.714	3.33543	5.43473e-89	7.10591e-86	molecular_function:metal ion binding	Syt2;Zfyve26;Actn4;Ppp5c;Myrip;Acp7;Cpz;Steap3;Nek6;Spon1;Gss;Pitpnm3;Zfp423;Cyp2d11;Necab2;Sh3rf1;Ctdspl;Naip1;Cbfa2t3;Pla2g4e;Fgd5;Kit;Itpk1;Zcchc24;Atp7b;Nt5dc1;Rbbp6;Nln;Ehmt1;C1s1;Gnaq;Rab11fip3;Kcnip4;Drosha;Atmin;Zeb2;Mta1;Klf12;Pdlim2;Dst;Man2b1;Racgap1;Tshz2;Map2k5;Zfp326;Mark2;Zfp521;Mep1a;Zfp385b;Sdf4;Capn9;Zfhx3;Adcy7;Fancl;Zfand4;Cacna1b;Kdm2b;Nr2c2;Phf10;Mob3b;Asxl2;Tll1;Trim41;Crip…
GO:0000166	1853	309	86.7275	3.56288	9.0685e-68	1.01632e-64	molecular_function:nucleotide binding	Tyk2;Hspa12a;Srpk2;Rab27a;Pde10a;Ntrk2;Rab3c;Ctps;Nek6;Trpm6;Camk2b;Gss;Akt1;Dph6;Ulk1;Insr;Nt5c2;Arf1;Stk3;Stk40;Dnah17;Camk1d;Cdk6;Camk4;Nmnat3;Ncbp3;Naip1;Kit;Atp2b1;Itpk1;Atp7b;Mst1r;Rab12;Map3k5;Eftud2;Atp9a;Clcn5;Gnaq;Magi1;Nuggc;Cdk20;Ulk4;Myo1d;Safb;Clcn7;Ksr2;Hk2;Fes;Erbb2;Pi4ka;Hlcs;Myo9b;Ror1;Agap3;Rfc4;Rab40b;Kif3c;Prkar1b;Agap1;Rbm19;Helq;Map2k5;Rab10;Abca3;Mark2;Prkar1a;Lars2;Map2k2…
GO:0016021	5354	587	250.588	2.34249	4.26688e-62	4.18421e-59	cellular_component:integral component of membrane	Scn5a;Syt2;Bscl2;Serinc2;Ntrk2;Steap3;Grm4;Tlr9;Kcnh1;Gpr31b;Immp2l;Cd22;Slc47a1;Sorl1;Lect1;Kit;Atp7b;F2rl3;Mst1r;Tmcc1;Xxylt1;Gp1ba;Cacng4;Olfr374;Cmtr2;Ptprs;Tnfrsf26;Hs3st2;Ptpru;Fas;Arfgef3;Dst;Tecpr1;Slc31a1;Cadm1;Slc45a1;Plxna1;Grik3;Fam173b;Sdk1;Vsir;Tmem255b;Ykt6;Pnpla3;Cacna1b;Alg1;Cacng2;Tmem192;Slc24a3;Atrnl1;Far2;Tlr5;Kcnq1;Cacna2d3;Musk;Rnf43;Alg8;Syne1;Boc;Itgb2;Ece1;Ints1;Slc28a3;…
GO:0005856	1093	217	51.1566	4.24188	1.43683e-59	1.25243e-56	cellular_component:cytoskeleton	Sorbs3;Fmn1;Spire2;Tyk2;Capzb;Bbs9;Bcas3;Zfyve26;Nek6;Cdc14a;Camk2b;Neil1;Med28;Synpo;Clic5;Ist1;Baiap2;Klhl2;Dnah17;Invs;Cdk6;Mad1l1;D430042O09Rik;Fgd5;Sgcd;Ccdc13;Map9;Mtcl1;Ppp2r2b;Rbbp6;Sipa1l1;Fam110b;Klc3;Rab11fip3;Bsn;Pard3;Fes;Myo9b;Lrrc48;Ttc8;Mta1;Flnb;Pdlim2;Ctnna2;Jakmip1;Tns4;Dst;Racgap1;Kif3c;Mtus2;Cobl;Mark2;Twf2;Diaph1;Gtse1;Rcc2;Haus4;Arhgap24;Cc2d2a;Epb41l4a;Wdpcp;Tbcel;Dync2h1;…
GO:0005524	1363	243	63.7936	3.80916	9.50034e-59	7.45301e-56	molecular_function:ATP binding	Cnnm2;Tyk2;Hspa12a;Srpk2;Ppp5c;Ntrk2;Ctps;P2rx3;Nek6;Trpm6;Camk2b;Gss;Akt1;Dph6;Ulk1;Insr;Stk3;Stk40;Dnah17;Camk1d;Cdk6;Camk4;Nmnat3;Naip1;Kit;Atp2b1;Itpk1;Atp7b;Mst1r;Map3k5;Atp9a;Clcn5;Magi1;Cdk20;Ulk4;Myo1d;Clcn7;Ksr2;Hk2;Fes;Erbb2;Pi4ka;Hlcs;Myo9b;Ror1;Rfc4;Kif3c;Helq;Map2k5;Abca3;Mark2;Twf2;Lars2;Map2k2;Runx2;Adcy7;Matk;Glud1;Cacna1b;Ripk1;Gars;Smc6;Pip5k1b;Dync2h1;Limk2;Aatk;Spg7;Myo18a;Ent…
GO:0070062	2579	351	120.707	2.90787	1.99574e-57	1.42333e-54	cellular_component:extracellular exosome	Scrib;Capzb;Edf1;Slc36a2;Actn4;Serinc2;Cpz;Ugt1a10;Tom1l2;Gss;Cd22;Lypla1;Mbd5;Ctdspl;Camk4;Sorl1;Grid1;Nid2;C1s1;Gp1ba;Gnaq;Atp6v0a4;Dpp6;Gbe1;Ptprs;Ptprg;Cryl1;Pi4ka;Rtn4rl2;Dab2ip;Pdlim2;Col6a1;Fas;Man2b1;Racgap1;Ggt1;Cadm1;Plxna1;Glb1;Sdk1;Crtac1;Fbn1;Fxyd3;Mep1a;Sdf4;Ykt6;Rasal3;Fgf9;Gars;Tmem192;Tex14;Anxa13;Lrrc15;Strip1;Tinagl1;Ptpro;Gna11;Sirpa;Opcml;Gpx4;Psma8;Col5a3;Itgb2;Ubxn6;Ece1;An…
GO:0006810	1796	278	84.0597	3.30717	8.59719e-56	5.62041e-53	biological_process:transport	Scn5a;Cnnm2;Mcu;Spire2;Vps26a;Bbs9;Kcnq5;Ap5s1;Ttpal;Actn4;Rab11fip1;Kpna1;Rab3c;Steap3;P2rx3;Tom1l2;Kcnh1;Trpm6;Akt1;Pitpnm3;Slc6a5;Clic5;Arf1;Slc39a8;Stau2;Slc47a1;Ncbp3;Cog5;Glrb;Sorl1;Grid1;Itpr1;Gulp1;Atp2b1;Atp7b;Pitpnm1;Rab12;Cacna1d;Slc23a3;Catsper2;Pltp;Kcnh5;Slc12a7;Clcn5;Cacng4;Dopey2;Atp6v0a4;Gle1;Rab11fip3;Scp2;Kcnip4;Ap2a2;Clcn7;Ttc8;Oaz1;Slco1a6;Cyb561a3;Mvb12b;Slc38a3;Jakmip1;Racg…
GO:0016740	1436	240	67.2103	3.57088	9.93069e-54	5.99279e-51	molecular_function:transferase activity	Mettl13;Tyk2;Srpk2;Mettl22;Ntrk2;Nek6;Trpm6;Setd3;Camk2b;Akt1;Ulk1;Gal3st3;Insr;Stk3;Stk40;Chrac1;Camk1d;Cdk6;Camk4;Nmnat3;Papd5;Trmt61a;Kit;Itpk1;Mst1r;Wbscr17;Map3k5;Ehmt1;Xxylt1;Gbe1;Cmtr2;Cdk20;Ulk4;Scp2;Ksr2;Hk2;Fes;Erbb2;Pi4ka;Gpam;B4galt1;Hs3st2;Tpmt;Tpst1;Ggt1;Map2k5;Mark2;Map2k2;Ykt6;Mocos;Extl3;Matk;Pnpla3;Ripk1;Suv39h2;Pip5k1b;Alg1;Limk2;Aatk;Glt1d1;Adrbk2;Sgk3;Ugt1a6a;Mettl16;Galnt18;…
GO:0030054	704	163	32.9499	4.9469	5.45134e-53	3.0547e-50	cellular_component:cell junction	Ptprj;Sorbs3;Ica1;Pxn;Dlgap2;Fmn1;Scrib;Syt2;Actn4;Otof;Sv2b;Lgi3;Cnih2;Sdk2;Synpo;Ccdc85c;Plekha7;Fat2;Grik4;Arf1;Epb41l3;Ptprr;Gjb6;Lrrtm4;Glrb;Kctd8;Nbea;Syngr1;Grid1;Focad;Kcnb1;Atp2b1;Lpp;Cldn15;Sipa1l1;Disc1;Sh3pxd2a;Park2;Ncs1;Magi1;Ctbp2;Camk2a;Hmcn2;Ldlrad3;Bsn;Atad1;Pacsin1;Pard3;Fes;Neurl1a;Rimbp2;Atp2b2;Tns3;Rgs12;Ptpru;Ctnna2;Srgap2;Clmp;Arhgap26;Tns4;Dst;Baiap2l2;Gria1;Scamp1;Cnih3;…
GO:0006351	1827	264	85.5106	3.08734	2.28021e-48	1.19255e-45	biological_process:transcription, DNA-templated	Gtf3c5;Cbx7;Foxp1;Elf5;Bcas3;Sin3a;Eya1;Twist2;Edf1;Casz1;Hdac9;Setd3;Hnf1b;Med28;Ssbp3;Zfp423;Zfp148;Mkl2;Med13l;Tbx15;Cbfa2t3;Col4a2;Emsy;Klf9;Zbtb20;Tfcp2;Commd2;Hdgfrp2;Batf;Vgll4;Kctd1;Ctbp2;Pax7;Eed;Atmin;Tfap2b;Safb;Mesp2;Zeb2;Erbb2;Litaf;Mta1;Klf12;Adnp2;Polr3e;Tada1;Ncoa6;Irak1bp1;Tshz2;Zfp326;Gtf2a1l;Zfp521;Ss18;Foxk1;Runx2;Figla;Zfhx3;Bcl11b;Nr1h2;Sap130;Kdm2b;Suv39h2;Supt5;Nr2c2;Phf10…
GO:0042995	694	154	32.4819	4.74111	2.9808e-48	1.46152e-45	cellular_component:cell projection	Ptprj;Ndrg2;Kif18a;Scrib;Bbs9;Mapt;Ngef;Arhgef15;Ksr1;Cnih2;Synpo;Ttc21b;Baiap2;Adam22;Tekt4;Klhl2;Dnah17;Cdk6;Agbl4;Dnah12;Sh3rf1;Hydin;Wdr34;Glrb;D430042O09Rik;Fgd5;Dnah8;Kcnb1;Ccdc13;Catsper2;Sh3pxd2a;Park2;Tenm4;Magi1;Myo10;Rsph1;Arl2bp;Cdk20;Cyld;Bglap3;Ttll5;Pacsin1;Neurl1a;B4galt1;Ptpn13;Lrrc48;Ttc8;Dab2ip;Robo1;Rgs12;Tctn2;Ctnna2;Srgap2;Slc6a11;Dst;Myo6;Gria1;Itga3;Homer2;Smn1;Gnas;Rab10;…
GO:0006355	2031	276	95.0586	2.90347	5.13509e-46	2.36969e-43	biological_process:regulation of transcription, DNA-templated	Cbx7;Foxp1;Elf5;Bcas3;Myrfl;Sin3a;Eya1;Twist2;Edf1;Casz1;Hdac9;Setd3;Hnf1b;Med28;Ssbp3;Zfp423;Zfp148;Mkl2;Insr;Med13l;Tbx15;Cbfa2t3;Emsy;Zbtb16;Klf9;Zbtb20;Tfcp2;Commd2;Batf;Vgll4;Kctd1;Ctbp2;Pax7;Eed;Atmin;Tfap2b;Safb;Mesp2;Zeb2;Zfp189;Erbb2;Litaf;Mta1;Klf12;Adnp2;Tada1;Ncoa6;Irak1bp1;Tshz2;Mta3;Pknox2;Zfp326;Gtf2a1l;Zfp521;Nup35;Ss18;Foxk1;Runx2;Figla;Nup133;Zfhx3;Bcl11b;Nr1h2;Sap130;Kdm2b;Suv3…
GO:0005654	1646	237	77.0391	3.07636	1.43339e-43	6.2472e-41	cellular_component:nucleoplasm	Cbx7;Scrib;Sin3a;Srpk2;Dgki;Ppp5c;Wdr4;Kpna1;Dnpep;Casz1;Sugp2;Tab1;Nek6;Cdc14a;Bop1;Hnf1b;Zfp148;Hadh;Stk40;Cdk6;Nol4l;Camk4;Cog5;D430042O09Rik;Emsy;Klf9;Zbtb20;Anks1;Rbbp6;Sh3d19;Mre11a;Ehmt1;Eftud2;Magi1;Rab11fip3;Scp2;Safb;Litaf;Mta1;Klf12;Tada1;Racgap1;Scamp1;Prpf6;Rbm19;Smn1;Helq;Zfp326;Rgs3;Nup35;Runx2;Cabin1;Zfhx3;Rnps1;Pola2;Sap130;Supt5;Nr2c2;Fank1;Gars;Stam2;Nelfa;Acot7;Atxn1;Smc6;Asxl…
GO:0007155	470	119	21.9978	5.40963	1.23628e-42	5.10452e-40	biological_process:cell adhesion	Sorbs3;Prkce;Pxn;Fat3;Dscam;Spg7;Prkca;Cntnap2;Muc4;Adgrg1;Celsr1;Dgcr2;Klra7;Col19a1;Pcdh10;Spon1;Farp2;Sorbs2;Sdk2;Epha2;Thbs3;Lama4;Cntnap1;Cd6;Stab2;Fat2;Atp4b;Itga9;Cd22;Ackr3;Tinagl1;Cdon;Tenm3;Ctnnd2;Ptprf;Tnr;Cdh22;Negr1;Itgb5;Klra1;Lpp;Lsamp;Cntn6;Boc;Itgb2;Cntn1;Vcan;Thbs4;Nid2;Lama5;Ctnna1;Gp1ba;Col6a2;Col13a1;Chl1;Cdh4;Col6a6;Clstn3;Col5a1;Cdh23;Ptprs;Azgp1;Lama1;Celsr3;Col7a1;Tenm2;N…
GO:0016301	613	133	28.6908	4.63564	3.90767e-41	1.53279e-38	molecular_function:kinase activity	Prkce;Tssk2;Sbk1;Tnni3k;Map4k4;Tyk2;Srpk2;Ntrk2;Dclk1;Nek6;Papss1;Trpm6;Camk2b;Akt1;Nek10;Nek5;Ulk1;Pip4k2a;Map4k1;Insr;Dgkg;Stk3;Stk40;Camk1d;Cdk6;Camk4;Fgfr4;Kit;Tbk1;Itpk1;Pdgfra;Mst1r;Epha6;Map3k5;Alpk3;Alk;Map3k13;Brsk2;Rps6kl1;Hkdc1;Camk2a;Map2k3;Cdk20;Ulk4;Dgkz;Fgfr1;Ksr2;Hk2;Fes;Trio;Erbb2;Hipk2;Pi4ka;Sgms1;Ip6k1;Map2k5;Mark2;Camkk1;Map2k2;Fer;Matk;Ripk1;Ptk7;Stk25;Pip5k1b;Zak;Bmpr1b;Ntrk…
GO:0045202	489	118	22.8871	5.15575	1.4627e-40	5.46422e-38	cellular_component:synapse	Gabrp;Ica1;Dlgap2;Sema4f;Dscam;Syt2;Shisa6;Ppfia4;Amph;Rapsn;Dgki;Dennd1a;Lrfn2;Pias3;Shank1;Prima1;Myrip;Ephb2;Adrbk2;Otof;Ptprn2;Sv2b;Slc6a17;Kcnh1;Lgi3;Cnih2;Sdk2;Synpo;Unc5c;Insr;Grik4;Dlg4;Arf1;Grid2ip;Lrrtm4;Gabbr2;Ppp1r9b;Glrb;Kctd8;Musk;Gabra5;Nbea;Syngr1;Grid1;Myo7a;Ank3;Grik5;Kcnb1;Atp2b1;Magi2;Syt7;Tanc1;Sipa1l1;Disc1;Tmem163;Faim2;Mdm2;Park2;Ncs1;Glra1;Ctbp2;Cdh23;Asic2;Camk2a;Cplx2;G…
GO:0016310	608	130	28.4567	4.56834	1.07616e-39	3.83749e-37	biological_process:phosphorylation	Prkce;Tssk2;Sbk1;Tnni3k;Map4k4;Tyk2;Srpk2;Ntrk2;Dclk1;Nek6;Papss1;Trpm6;Camk2b;Akt1;Nek10;Nek5;Ulk1;Pip4k2a;Map4k1;Insr;Dgkg;Stk3;Stk40;Camk1d;Cdk6;Camk4;Fgfr4;Kit;Tbk1;Itpk1;Pdgfra;Mst1r;Epha6;Map3k5;Alpk3;Alk;Map3k13;Brsk2;Rps6kl1;Hkdc1;Camk2a;Map2k3;Cdk20;Ulk4;Dgkz;Fgfr1;Ksr2;Hk2;Fes;Trio;Erbb2;Hipk2;Pi4ka;Sgms1;Ip6k1;Map2k5;Mark2;Camkk1;Map2k2;Fer;Matk;Ripk1;Stk25;Pip5k1b;Zak;Bmpr1b;Ntrk3;Lim…
GO:0006468	566	125	26.491	4.71859	1.79298e-39	6.11562e-37	biological_process:protein phosphorylation	Prkce;Tssk2;Sbk1;Tnni3k;Map4k4;Tyk2;Srpk2;Ntrk2;Ksr1;Dclk1;Nek6;Trpm6;Camk2b;Akt1;Nek10;Nek5;Ulk1;Map4k1;Insr;Stk3;Stk40;Camk1d;Cdk6;Camk4;Fgfr4;Kit;Tbk1;Pdgfra;Mst1r;Epha6;Map3k5;Alpk3;Alk;Map3k13;Brsk2;Rps6kl1;Camk2a;Tgfb2;Map2k3;Cdk20;Ulk4;Fgfr1;Ksr2;Fes;Trio;Erbb2;Hipk2;Ror1;Prkar1b;Map2k5;Mark2;Prkar1a;Camkk1;Map2k2;Fer;Rara;Aurkc;Matk;Ripk1;Ptk7;Stk25;Zak;Bmpr1b;Ntrk3;Limk2;Aatk;Prkca;Mapk1…
GO:0007275	1018	170	47.6463	3.56796	6.06128e-39	1.98128e-36	biological_process:multicellular organism development	Ndrg2;Ryr2;Tssk2;Fat3;Scrib;Ldb1;Eya1;Tbx20;Twist2;Edf1;Ngef;Ntrk2;Tet3;Casz1;Dclk1;Klhl40;Wnt8a;Akt1;Sema5b;Ccdc85c;Spred2;Zfp423;Mkl2;Wdr18;Invs;Wnt9a;Nrp2;Hydin;Sorl1;Lect1;Morc1;Pdgfra;Naa15;Catsper2;Disc1;Myog;Col13a1;Chl1;Trim71;Sema6a;Alpk3;Gtf2ird1;Tenm4;Plekhb1;Slit1;Dach1;Cdk20;Pax7;Btbd7;Celsr3;Tnfrsf26;Mesp2;Hhat;Adcyap1r1;Cspg5;Chrdl2;Wnt7b;Dab2ip;Robo1;Pax2;Bin1;Ctnna2;Tle3;Arvcf;Fa…
GO:0016787	1514	214	70.861	3.02	1.26464e-38	3.96843e-36	molecular_function:hydrolase activity	Eya1;Ppp5c;Acp7;Cpz;Pde10a;Dnpep;Hdac9;Cdc14a;Neil1;Nt5c2;Immp2l;Lypla1;Tmprss3;Ctdspl;Ace2;Pla2g4e;Ptpn22;Atp2b1;Itpk1;Plcg2;Atp7b;Nt5dc1;Pnpla5;Cdadc1;Nln;Mre11a;Atp9a;C1s1;Nuggc;Engase;Ptprs;Dpep2;Ptprg;Drosha;Plce1;Plcb1;Prss28;Ptpru;Man2b1;Adamts12;Ggt1;Acot11;Helq;Glb1;Tmprss5;Mep1a;Abhd3;Capn9;Smg6;Pnpla3;Exosc10;Gars;Acot7;Tll1;Spg7;Entpd2;Ntpcr;Adprhl1;Atp8a2;Ang;Ptprn2;Plcg1;Mtmr3;Ptp4a…
GO:0004672	511	116	23.9168	4.85015	9.20024e-38	2.776e-35	molecular_function:protein kinase activity	Prkce;Tssk2;Ntrk3;Limk2;Sbk1;Tnni3k;Aatk;Map4k4;Prkca;Mapk1;Tyk2;Srpk2;Tex14;Mknk1;Dapk1;Ephb2;Adrbk2;Sgk3;Ntrk2;Ksr1;Irak2;Dclk1;Cdk14;Nek6;Camk2b;Akt1;Nek10;Epha2;Nek5;Ulk1;Txk;Insrr;Map4k1;Insr;Stk3;Dapk2;Stk40;Camk1d;Cdk6;Flt1;Igf1r;Camk4;Ppp1r9b;Ick;Musk;Fgfr4;Mylk;Kit;Tbk1;Dyrk1a;Pdgfra;Mst1r;Mapk13;Ror2;Tesk2;Epha6;Map3k5;Oxsr1;Tlk2;Gtf2h2;Eif2ak2;Alk;Map3k13;Brsk2;Rps6kl1;Mast4;Camk2a;Map…
GO:0043025	520	116	24.338	4.76621	3.755e-37	1.09104e-34	cellular_component:neuronal cell body	Kcnk2;Ogt;Capzb;Dgki;Scn8a;Ppp5c;Pde10a;Ntrk2;Txnrd1;P2rx3;Kcnh1;Ulk1;Kcnc4;Baiap2;Insr;Scn3a;Stau2;Tmprss3;Naip1;Txnrd2;Sorl1;Sncg;Itpr1;Npcd;Kcnb1;Myo5b;Cacna1d;Sipa1l1;Trpm5;Dpp6;Khsrp;Myo10;Asic2;Camk2a;Tgfb2;Cplx2;Myo1d;Kcnip4;Bsn;Pard3;Lsm1;Atp2b2;Dab2ip;Robo1;Rgs12;Cacna1c;Fas;Myo6;Ass1;Kif3c;Slc31a1;Gria1;Pde1c;Homer2;Gnas;Cobl;Tmprss5;Itpr3;Begain;Rara;Ykt6;Dlgap4;Cacna1b;Ncam1;Brinp2;Cp…
GO:0045944	971	161	45.4465	3.54263	1.04857e-36	2.93787e-34	biological_process:positive regulation of transcription by RNA polymerase II	Foxp1;Ogt;Elf5;Bcas3;Sin3a;Ldb1;Eya1;Tbx20;Zbtb7c;Atad2b;Runx1;Slc11a1;Tet3;Tlr9;Setd3;Hnf1b;Akt1;Ssbp3;Zfp148;Slc9a1;Zmiz1;Mkl2;Smarca2;Cdon;Ldb2;Top2a;Glp1r;Tbk1;Klf9;Batf;Ccdc62;Pbx3;Ncoa1;Ppp1r12a;Myog;Tead4;Park2;Tet1;Ctbp2;Pax7;Fgfr1;Skap1;Tfap2b;Lif;Safb;Mesp2;Zeb2;Nfatc1;Hipk2;Tcf20;Ccnk;Klf12;Dlx6os1;Dab2ip;Pax2;Smarcb1;Myo6;Ncoa6;Zeb1;Wwp2;Mkl1;Esrrb;Prpf6;Map2k5;Ebf2;Zfp957;Gli2;Mamstr…
GO:0030154	765	138	35.8049	3.85422	4.07165e-35	1.10145e-32	biological_process:cell differentiation	Ndrg2;Tssk2;Snapc4;Scrib;Tyk2;Taf4b;Syt2;Srpk2;Twist2;Edf1;Ngef;Ptbp3;Ntrk2;Dclk1;Camk2b;Sema5b;Zfp423;Mkl2;Cdk6;Nrp2;Cbfa2t3;Lect1;Kit;Morc1;Naa15;1700112E06Rik;Batf;Catsper2;Myog;Col13a1;Chl1;Sema6a;Tenm4;Ctbp2;Slit1;Cplx2;Pard3;Adcyap1r1;Fes;Cspg5;Acer1;Chrdl2;Gna13;Robo1;Pax2;Ptpru;Flnb;Bin1;Smarcb1;Ctnna2;Tle3;Racgap1;Ankrd49;Zeb1;Cadm1;Sema4g;Mark2;Zfp521;Gli2;Syt1;Efnb3;Foxk1;Rbm38;Figla;A…
GO:0005509	585	117	27.3802	4.27315	1.20788e-33	3.15861e-31	molecular_function:calcium ion binding	Ryr2;Fat3;Egfem1;C2cd4c;Syt2;Actn4;Otof;Capn8;C1s2;Padi3;Lrp2;Tbc1d9b;Stab2;Fat2;Dgkg;Ltbp4;Necab2;Syt14;Megf6;Micu2;C2cd4b;Itpr1;Anxa11;Vcan;Thbs4;Nid2;C1s1;Cdh4;Ncs1;Fstl4;Slit1;Masp1;Cdh23;Rab11fip3;Hmcn2;Celsr3;Kcnip4;Bglap3;Lrp1b;Plcb1;Nell2;Esyt2;Padi6;Astn2;Egf;Sulf1;Dst;Phf24;Crtac1;Fbn1;Slc25a13;Cdh15;Syt1;Sdf4;Spock1;Itpr3;Capn9;Cacna1b;Bmp1;Dner;Tll1;Tgm2;Slit3;Smoc1;Nin;Matn3;Nkd2;Slc…
GO:0005794	1151	169	53.8712	3.13711	8.51895e-33	2.15584e-30	cellular_component:Golgi apparatus	Col26a1;Mettl22;Rab27a;P2rx3;Lrp2;Zfp148;Clic5;Gal3st3;Arf1;Sh3rf1;Lgr5;Cog5;Cbfa2t3;Sorl1;Fgd5;Atp7b;Pitpnm1;Rab12;Gbf1;Wbscr17;Sh3d19;Atp9a;Clcn5;Ncs1;Plce1;Cryl1;Fes;Litaf;Cspg5;B4galt1;Nlrp2;Hs3st2;Igfbp6;Tpst1;Scamp1;Glb1;Rab10;Xpr1;Map2k2;Sdf4;Ykt6;Ap4s1;Atp8b4;Arv1;Dync2h1;Myo18a;Cntnap2;Atp8a2;Ap1m1;Galnt18;Hip1;St3gal3;Syne1;Tjap1;Ece1;Map6;Ascc3;Copg2;Ctnna1;Slc30a7;Hs3st5;Exoc4;Tenm2;P…
GO:0035556	378	92	17.6918	5.20014	2.35264e-32	5.76764e-30	biological_process:intracellular signal transduction	Prkce;Tssk2;Gna12;Map4k4;Prkca;Mapk1;Tyk2;Pea15a;Srpk2;Cspg4;Mknk1;Smad4;Dapk1;Sgk3;Prex1;Rapgef5;Tgfbr3;Ksr1;Abr;Dclk1;Plcg1;Akt1;Asb14;Adcy8;Dcdc2a;Nrg3;Map4k1;Dab1;Dgkg;Stk3;Dapk2;Prex2;Spsb4;Camk4;Spsb1;Ick;Asb8;Kit;Plcg2;Adcy2;Clnk;Arhgef3;Mapk13;Tiam2;Depdc1b;Oxsr1;Tlk2;Smad2;Zp3;Rasa3;Myo9a;Brsk2;Mast4;Dgkz;Vav3;Rasal1;Plch2;Plce1;Ksr2;Plcb1;Nfatc1;Cdc42bpb;Myo9b;Gna13;Nuak1;Itsn1;Asb2;Rab…
GO:0005829	1279	178	59.8621	2.9735	6.82626e-32	1.62279e-29	cellular_component:cytosol	Vps26a;Dgki;Bak1;Ppp5c;Kpna1;Ntrk2;Rab3c;Camk2b;Gss;Akt1;Ulk1;Ist1;Baiap2;Insr;Arf1;Lypla1;Sh3rf1;Zbtb16;Npcd;Plcg2;Ppp2r2b;Nln;Map3k5;Gnaq;Ncs1;Itpkb;Rsph1;Scp2;Kcnip4;Plce1;Ksr2;Hk2;Plcb1;Hlcs;Oaz1;Rgs12;Gatsl2;Mvb12b;Baiap2l2;Gria1;Agap1;Acot11;Smn1;Ttc7b;Map2k5;Abca12;Traf2;Map2k2;Dlc1;Smg6;Acot7;Pip5k1b;Gli3;Adrbk2;Plcg1;Klc1;Dab1;Zfyve28;Ofcc1;Gna11;Gtpbp1;Ppp3ca;Gpx4;Nfatc2;Ppp1r16a;Anxa2;…
GO:0030425	438	98	20.5001	4.78047	8.05215e-32	1.85791e-29	cellular_component:dendrite	Ica1;Fat3;Dlgap2;Prkca;Nin;Dennd1a;Mapt;Pias3;Shank1;Scn8a;Rgs8;Rab27a;Ephb2;Kpna1;Ntrk2;Arhgef15;Kcnh1;Cacna1a;Crhbp;Camk2b;Sorbs2;Cnih2;Plcb4;Synpo;Kcnc4;Grik4;Dlg4;Stau2;Crmp1;Lrp8;Ppp1r9b;Gabra5;Txnrd2;Pex5l;Negr1;Rptor;Itpr1;Ank3;Npcd;Grik5;Kcnb1;Magi2;Adcy2;Dpysl5;Tanc1;Cacna1d;Gnao1;Chl1;Gnaq;Ncs1;Trpm5;Vmn2r1;Khsrp;Camk2a;Cplx2;Grip1;Kcnip4;Pde2a;Bsn;Bglap3;Nell2;Lsm1;Atp2b2;Brd1;Rgs12;Ki…
GO:0006811	575	111	26.9122	4.12452	7.00527e-31	1.57018e-28	biological_process:ion transport	Ryr2;Scn5a;Kcnk2;Cnnm2;Mcu;Kcnq5;Scn8a;Slc11a1;Steap3;P2rx3;Slc23a2;Kcnh1;Trpm6;Atp6v1c1;Slc9a1;Kcnc4;Clic5;Slc4a5;Grik4;Slc39a8;Glrb;Slc10a7;Grid1;Itpr1;Kcnb1;Atp2b1;Cldn15;Atp7b;Kcnq2;Cacna1d;Trf;Catsper2;Kcnh5;Slc12a7;Clcn5;Cacng4;Atp6v0a4;Trpm5;Asic2;Kcnip4;Slc30a2;Clcn7;Atp2b2;Cacna2d4;Kcnk13;Slco1a6;Cacna1c;Cacna1s;Slc38a3;Racgap1;Tmc3;Slc31a1;Gria1;Grik3;Slco2b1;Fxyd3;Asic1;Itpr3;Cacna1b;S…
GO:0008270	981	147	45.9146	3.2016	1.17287e-29	2.55588e-27	molecular_function:zinc ion binding	Pxn;Trim29;Chd4;Cpz;Dnpep;Neil1;Zswim8;Zmiz1;Trim8;Adamts18;Adam22;Agbl4;Zmat4;Sh3rf1;Sec24a;Phf20;Morc1;Lpp;Zcchc24;Atp7b;Rbbp6;Cdadc1;Rnf220;Man2b2;Ehmt1;Nrap;Trim71;Gtf2h2;Mical3;Tet1;Adamts20;Mid1;Rnf185;March2;Trim27;Agbl1;Cyld;Ddah1;Neurl1a;Adam1a;Tcf20;Papln;Myo9b;Mta1;Pdlim2;Man2b1;Lvrn;Adamts12;Esrrb;Amz1;Mta3;Zfp326;Rnft2;Gli2;Traf2;Mep1a;Zfp385b;Rara;Zfhx3;Nr1h2;Zfand4;Kdm2b;Suv39h2;Nr…
GO:0043005	416	91	19.4704	4.67376	4.44185e-29	9.41793e-27	cellular_component:neuron projection	Ryr2;Kcnk2;Prkca;Ogt;Kif5c;Mapt;Shank1;Actn4;Ppp5c;Grm4;Sv2b;Plcg1;P2rx3;Lgi3;Klc1;Ulk1;Unc5c;Tph1;Baiap2;Dab1;Arf1;Cpne5;Gabbr2;Igf1r;Tenm3;Naip1;Ctnnd2;Ppp1r9b;Ptprf;Atp2b4;Ank3;Grik5;Kcnb1;Myo5b;Magi2;Ngfr;Anks1;Sipa1l1;Gnao1;Ncoa1;Nap1l1;Pdzd2;Park2;Glra1;Tenm4;Atp6v0d1;Klc3;Myo10;Asic2;Gpi1;Grip1;Exoc4;Myo1d;Bsn;Tenm2;Kcnab2;Pacsin1;Adcyap1r1;Erc2;Shank2;Ptpn13;Cyfip2;Tenm1;Itsn1;Kcnq4;Fas;N…
GO:0003677	1713	205	80.175	2.55691	1.55469e-28	3.20962e-26	molecular_function:DNA binding	Gtf3c5;Foxp1;Elf5;Myrfl;Sin3a;Ldb1;Twist2;Edf1;Casz1;Neil1;Hnf1b;Ssbp3;Zfp423;Zfp148;Tbx15;Chrac1;Mbd5;Papd5;Zbtb16;Klf9;Zbtb20;Tfcp2;Hdgfrp2;Batf;Mre11a;Pax7;Tfap2b;Safb;Mesp2;Zeb2;Mta1;Klf12;Adnp2;Rfc4;Tshz2;Mta3;Pknox2;Zfp326;Gtf2a1l;Zfp521;Foxk1;Runx2;Figla;Zfhx3;Tox;Smg6;Nr1h2;Pola2;Kdm2b;Dlx2;Nr2c2;Ahdc1;Atxn1;Asxl2;Ash2l;Nfix;Tfeb;Rbl2;Zfp64;Zfp821;Gli3;Smad4;Ebf1;Ang;Csrnp3;Zbtb42;Myt1l;C…
GO:0042803	771	124	36.0858	3.43626	8.84747e-28	1.7797e-25	molecular_function:protein homodimerization activity	Nacc2;Prdm6;Foxp1;Ldb1;Bak1;Actn4;Ntrk2;Slc11a1;Txnrd1;Ugt1a10;Camk2b;Gss;Hnf1b;Olfml2a;Zfp423;Trim8;Arf1;Tbx15;Syt14;Klhl2;Top2a;Txnrd2;Emsy;Zbtb16;Myo7a;Kit;Pdgfra;Mtcl1;Map3k5;Sftpc;Ugt1a5;Tenm4;Map3k13;Ctbp2;Masp1;Mid1;Camk2a;Rab11fip3;Tgfb2;Scp2;Drosha;Fgfr1;Tfap2b;Cryl1;Plcb1;Hlcs;Tenm1;Dab2ip;Gstz1;Srgap2;Cadm1;Homer2;Mtus2;Dmrtc1a;Nectin4;Nup35;Dgkd;Gdnf;Stk25;Acot7;Commd1;Tmem192;Tpm1;Ug…
GO:0005887	1089	150	50.9694	2.94294	7.1725e-27	1.40671e-24	cellular_component:integral component of plasma membrane	Plppr1;Ntrk2;Pcdhgc3;Steap3;Grm4;Slc22a13;P2rx3;Slc7a15;Kcnh1;Slc6a5;Slc4a5;Insr;Slc39a8;Cd22;Mpzl1;Cdon;Lgr5;Glrb;Sgcd;Atp2b1;Atp7b;Cacna1d;Kcnh5;Slc12a7;Gp1ba;Clcn5;Cdh4;Tenm4;Tnfrsf26;Slco1a6;Adra1b;Ror1;Fas;Slc38a3;Ggt1;Gpc5;Cadm1;Plxna1;Grik3;Slco2b1;Nectin4;Fxyd3;Asic1;Ykt6;Sema4d;Slc22a3;AU018091;Tspan9;Eda;Slc4a8;Gpc6;Slc24a3;Tspan14;Ugt1a1;Gabbr2;Tlr5;Kcnq1;Sirpa;Musk;Rnf43;Kcnmb2;Atp2b4…
GO:0004674	409	86	19.1428	4.49256	1.42151e-26	2.71994e-24	molecular_function:protein serine/threonine kinase activity	Prkce;Tssk2;Limk2;Sbk1;Tnni3k;Aatk;Map4k4;Prkca;Mapk1;Srpk2;Mknk1;Dapk1;Adrbk2;Sgk3;Irak2;Dclk1;Cdk14;Nek6;Trpm6;Camk2b;Akt1;Nek10;Nek5;Ulk1;Csnk2a1;Map4k1;Stk3;Dapk2;Stk40;Camk1d;Cdk6;Camk4;Ick;Mylk;Tbk1;Dyrk1a;Mapk13;Tesk2;Map3k5;Oxsr1;Tlk2;Eif2ak2;Alpk3;Map3k13;Brsk2;Rps6kl1;Mast4;Camk2a;Map2k3;Cdk20;Ulk4;Myo3b;Aurka;Ksr2;Trio;Hipk2;Cdc42bpb;Nuak1;Ttn;Tnik;Adck5;Map2k5;Lrrk2;Mark2;Camkk1;Mok;L…
GO:0032403	355	80	16.6154	4.81482	1.58778e-26	2.96574e-24	molecular_function:protein-containing complex binding	Pxn;Lrrc16a;Amph;Hadhb;Sin3a;Mapt;Muc4;Shank1;Actn4;Ugt1a6b;Otof;Ugt1a6a;Tab1;Nespas;Hnf1b;Ulk1;Lrp2;Ist1;Insr;Dlg4;Ppp1r9b;Gna11;Ptprf;Rptor;Myo7a;Itpr1;Magi2;Pdgfra;Itgb2;Ppp2r2b;Kctd5;Sipa1l1;Gnao1;Ncoa1;Disc1;Ezr;Gnaq;Park2;Ppara;Ddx39b;Atp6v0d1;Ywhaz;Fam178a;Myo1e;Exoc4;Fgfr1;Skap1;Hadha;Ap2a2;Erc2;Wrap53;Pcdh15;Mthfr;Ptch1;Dab2ip;Tceb1;Fyn;Ncoa2;Bin1;Fas;Ptk2;Thra;Ppfia2;Ephb1;Rapgef4;Rarb;…
GO:0003779	333	77	15.5857	4.94043	3.31348e-26	6.04518e-24	molecular_function:actin binding	Lsp1;Palld;Fmn1;Baiap2l1;Kif18a;Spire2;Capzb;Tpm1;Actn4;Sntg2;Myrip;Ang;Mical2;Tns1;Mprip;Med28;Synpo;Sntg1;Mkl2;Hip1;Crocc;Epb41l3;Klhl2;Myo1h;Clmn;Ppp1r9b;Ipp;Tbccd1;Tnnc2;Inf2;Myo7a;Syne1;Mylk;Myo5b;Cap2;Ezr;Nrap;Ssh1;Park2;Myo9a;Mical3;Mtss1;Myo10;Syne2;Myh7b;Myo1e;Phactr3;Klhl3;Myo1d;Plec;Myo3b;Ssh2;Myo16;Myo9b;Myh11;Flnb;Ptk2;Tns4;Dst;Myo6;Mkl1;Vcl;Homer2;Enah;Epb41l1;Cobl;Sntb1;Lrrk2;Twf2;…
GO:0007399	369	80	17.2706	4.63215	1.36252e-25	2.42931e-23	biological_process:nervous system development	Ndrg2;Ntrk3;Sema4f;Dscam;Spg7;Slit3;Plppr1;Ngef;Shank1;Ephb2;Adgrg1;Ntrk2;Dclk1;Hdac9;Camk2b;Akt1;Sema5b;Myt1l;Zfp423;Dcdc2a;Dab1;Mef2c;Crmp1;Camk1d;Mbd5;Smarca2;Fnbp1;Nrp2;Ppp1r9b;Glrb;Ptprf;Elp3;Magi2;Ngfr;Cntn6;Dpysl5;Cntn1;Disc1;Thbs4;Glis2;Chl1;Sema6a;Rbfox1;Alk;Mtss1;Brsk2;Slit1;Cplx2;Grip1;Erbb2;Ccdc64;Cspg5;Zc3h12a;Robo1;Robo2;Plxna4;Dlg2;Smarcb1;Pax5;Srgap2;Tnik;Zeb1;Smarcd3;Smn1;Enah;Se…
GO:0030424	333	75	15.5857	4.81211	5.61684e-25	9.79202e-23	cellular_component:axon	Kcnk2;Palld;Dscam;Prkca;Mapk1;Nin;Syt2;Mapt;Ephb2;Adrbk2;Ntrk2;P2rx3;Kcnh1;Synpo;Klc1;Cntnap1;Kcnab1;Kcnc4;Grik4;Scn3a;Adam22;Stau2;Nrp2;Igf1r;Lrp8;Txnrd2;Sncg;Ank3;Grik5;Kcnb1;Pdgfra;Boc;Itpr2;Katnb1;Disc1;Kif13b;Sema6a;Ncs1;Alk;Camk2a;Tgfb2;Myo1d;Pde2a;Bsn;Kcnab2;Chrna10;Lsm1;Nfasc;Dab2ip;Robo1;Kirrel3;Bin1;Ctnna2;Kcnj6;Nf1;Myo6;Kif3c;Ephb1;Cadm1;Slc6a1;Rapgef4;Shtn1;Grik3;Cobl;Lrrk2;Syt11;Ptk2…
GO:0043234	618	104	28.9248	3.59553	5.74719e-25	9.80146e-23	cellular_component:protein-containing complex	Ryr2;Sin3a;Ldb1;Eya1;Dgki;Actn4;Ppp5c;Chd4;Runx1;Ksr1;Tab1;Slc7a15;Akt1;Ssbp3;Lrp2;Stk3;Sdc1;Kidins220;Top2a;Itpr1;Myo5b;Kcnq2;Usp28;Pdgfra;Klk1b21;Sipa1l1;Col6a2;Gnaq;Park2;Ddx39b;Alk;Ywhaz;Scp2;Pard3;Rgs12;Pax2;Cacna1c;Col6a1;Smarcb1;Myo6;Gria1;Epb41l1;Prkar1a;Usp10;Traf2;Runx2;Rgs6;Cacna1b;Ripk1;Pex14;Smarca4;Iqgap1;Atxn1;Hdac4;Prkca;Mapk1;Tpm1;Muc4;Nrxn2;Ugt1a6b;Smad4;Ugt1a6a;Ctu2;Cacna1a;Sma…
GO:0007165	1216	156	56.9135	2.741	6.15664e-25	1.02764e-22	biological_process:signal transduction	Plppr1;Pde10a;Grm4;Tom1l2;Tlr9;Gpr31b;Akt1;Ulk1;Stk3;Mpzl1;Camk4;Lgr5;Plcg2;F2rl3;Gnaq;Tenm4;Fpr1;Plce1;Plcb1;Erbb2;Myo9b;Dab2ip;Rgs12;Adra1b;Agap3;Fas;Racgap1;Plxna1;Gucy2d;Rgs3;Traf2;Arhgap40;Dlc1;Cabin1;Gna14;Arhgap24;Bcl11b;Ripk1;Rasal3;Stard13;Lsp1;Ppp4r1;Wnt5b;Adrbk2;Rxfp2;Plcg1;Ackr3;Gabbr2;Tlr5;Gna11;Cap2;Tas1r3;Pde4d;Pomc;Arhgap22;Ccnd3;Tenm2;Plch2;Mllt4;Ptch1;Gas6;Rin1;Card11;Unc5d;Ptk2…
GO:0005783	1286	161	60.1897	2.67488	9.87262e-25	1.61356e-22	cellular_component:endoplasmic reticulum	Scn5a;Cyp2w1;Col26a1;Bscl2;Bak1;Ugt1a10;Tlr9;Lrp2;Cyp2d11;Mamdc2;Stau2;Tmprss3;Glrb;Sorl1;Fgd5;Itpr1;Atp7b;Pitpnm1;Tmcc1;Thbs4;Map3k5;Txndc11;Xxylt1;Usf3;Rnf185;Ubxn8;March2;Scp2;Cspg5;Tmem117;Dst;Dpm1;Gria1;Rab10;Map2k2;Ykt6;Erlec1;Extl3;Sil1;Alg1;Sema4f;Aatk;Muc4;Ugt1a6a;Rnf180;Ugt1a1;Dlg4;Far2;Pomp;Ofcc1;Kcnq1;Rnf43;Alg8;Vac14;Pdzd2;Pigl;Grip1;Tenm2;Atp11a;Zc3h12a;Cldn10;Ugt1a2;Acsbg1;Abca17;P…
GO:0005096	229	62	10.7181	5.78462	1.77355e-24	2.83949e-22	molecular_function:GTPase activator activity	Arhgap22;Grtp1;Arl2bp;Rasal1;Rabgap1l;Arhgap15;Adprhl1;Tbc1d9;Arap1;Rgs8;Plcb1;Tbc1d1;Arhgef15;Myo9b;Cdc42ep3;Abr;Dab2ip;Rgs12;Arfgap2;Agap3;Smap2;Srgap2;Tbc1d9b;Tbc1d2b;Garnl3;Rasal2;Arhgap23;Nf1;Arhgap26;Rin1;Racgap1;Arhgap1;Arhgap12;Prex2;Agap1;Arhgap20;Lrrk2;Rgs3;Usp6nl;Nprl3;Arhgap40;Dlc1;Als2cl;Arhgap24;Srgap1;Sipa1l1;Adap1;Rgs6;Smap1;Tiam2;Tbc1d22a;Depdc1b;Rasal3;Tbcd;Tbc1d16;Rasa3;Rin2;Gn…
GO:0005578	296	69	13.8539	4.98053	7.48407e-24	1.17425e-21	cellular_component:extracellular matrix	Col11a2;Tgm2;Smoc1;Slit3;Wnt5b;Ptn;Matn3;Col26a1;Otoa;Wnt7a;Col6a3;Gpc6;Cpz;Tgfbr3;Col19a1;Spon1;Thsd4;Wnt8a;Olfml2a;Lama4;Muc2;Adamts18;Mamdc2;Ltbp4;Wnt9a;Adamtsl5;Col4a2;Tnr;Lect1;Anxa2;Vcan;Thbs4;Nid2;Lama5;Col6a2;Fbln2;Zp3;Chl1;Col6a6;Fbn2;Adamts20;Col5a1;Slit1;Hmcn2;Lama1;Col7a1;Adamts2;Alpl;Papln;Wnt7b;Lama2;Lamc2;Col6a1;Col24a1;Col27a1;Adamts12;Abi3bp;Gpc5;Podn;Wnt5a;Crtac1;Fbn1;Tecta;Spoc…
GO:0000122	711	107	33.2775	3.21538	2.55757e-22	3.93414e-20	biological_process:negative regulation of transcription by RNA polymerase II	Sorbs3;Cbx7;Foxp1;Sin3a;Tbx20;Twist2;Trim29;Chd4;Zkscan17;Mxi1;Hdac9;Hnf1b;Zfp148;Mlip;Cdk6;Cbfa2t3;Zbtb16;Bach2;Zbtb20;Ehmt1;Park2;Ctbp2;Dach1;Fgfr1;Trim27;Eed;Tfap2b;Zeb2;Aebp2;Nfatc1;Hipk2;Klf12;Dab2ip;Pax2;Bcl11a;Prdm14;Zeb1;Wwp2;Map2k5;Gli2;Tbx2;Hnrnpab;Rara;Zfhx3;Nr1h2;Sap130;Kdm2b;Glis1;Suv39h2;Supt5;Dlx2;Fgf9;Smarca4;Sema4d;Atxn1;Asxl2;Nfix;Hdac4;Hmg20a;Ift172;Gli3;Smad4;Nr2c1;Zbtb42;Rreb…
GO:0045893	561	93	26.257	3.54192	3.77417e-22	5.69392e-20	biological_process:positive regulation of transcription, DNA-templated	Foxp1;Eya1;Tbx20;Runx1;Zkscan17;Cks1brt;Hnf1b;Blm;Ssbp3;Zfp423;Mkl2;Insr;Smarca2;Camk4;Zbtb16;Tfcp2;Naa15;Trf;Ncoa1;Myog;Zp3;Map2k3;Skap1;Atmin;Tfap2b;Plcb1;Nfatc1;Hipk2;Egf;Pax2;Ankrd49;Ncoa6;Mkl1;Zfp326;Pcid2;Ebf2;Gli2;Map2k2;Foxk1;Hnrnpab;Runx2;Rara;Zfhx3;Nr1h2;Glis1;Fgf9;Smarca4;Tfeb;Afap1l2;Hdac4;Hivep3;Wnt7a;Nfatc3;Btbd8;Gli3;Smad4;Ebf1;Arhgef11;Smad3;Mef2c;Ppargc1b;Igf1r;Nfatc2;Ddit3;Crebb…
GO:0014069	209	55	9.782	5.62257	1.96287e-21	2.90541e-19	cellular_component:postsynaptic density	Camk2a;Ywhaz;Sos1;Exoc4;Bsn;Mib1;Kcnab2;Dgki;Mapt;Shank1;Erc2;Neurl1a;Pkp4;Shank2;Ntrk2;Ptch1;Dclk1;Camk2b;Fyn;Bcl11a;Sorbs2;Cacna1c;Cnih2;Ncoa2;Plcb4;Dlg2;Ctnna2;Srgap2;Nf1;Baiap2;Dab1;Dlg4;Dst;Epb41l3;Gria1;Lrp8;Ctnnd2;Ppp1r9b;Epb41l1;Syt11;Itpr1;Grik5;Magi2;Ngfr;Cap2;Ptk2b;Adgrb1;Sipa1l1;Eps8;Disc1;Kalrn;Pdzd2;Park2;Cpeb1;Clstn3;
GO:0048471	547	90	25.6017	3.51539	2.61316e-21	3.79634e-19	cellular_component:perinuclear region of cytoplasm	Prkce;Ica1;Tnks2;Ptn;Dgki;Hmgcll1;Actn4;Myrip;Rab3c;Kcnh1;Rab3b;Slc9a1;Sorl1;Ptpn22;Inf2;Sncg;Itpr1;Myo5b;Atp7b;Trf;Disc1;Mre11a;Atp9a;Zp3;Park2;Golga1;Ywhaz;Fgfr1;Pacsin1;Erbb2;Myo9b;Lamc2;Fas;Rab40b;Myo6;Arhgap1;Itga3;Dync1i1;Rab10;Cobl;Twf2;Map2k2;Itpr3;Rara;Cpeb1;Aatk;Prkca;Hhatl;Tmem192;Adrbk2;Prex1;Zdhhc8;Thbs3;Dab1;Rab11fip4;Ctif;Ofcc1;Pex5l;Syne1;Magi2;Ece1;Anxa2;Map6;Ezr;Tlk2;Slc30a7;Eif…
GO:0005516	173	50	8.09706	6.17508	4.19283e-21	5.9805e-19	molecular_function:calmodulin binding	Ryr2;Scn5a;Myo10;Camk2a;Myo1e;Myo1d;Kcnn4;Edf1;Plcb1;Mknk1;Dapk1;Phkb;Grm4;Myo9b;Myh11;Atp2b2;Kcnh1;Cacna1a;Camk2b;Ryr1;Cacna1c;Fbxl2;Slc9a1;Adcy8;Scn3a;Myo6;Dapk2;Ttn;Invs;Camk1d;Pde1c;Camk4;Kcnq1;Sntb1;Camkk1;Atp2b4;Ppp3ca;Myo7a;Mylk;Phkg2;Syt1;Atp2b1;Myo5b;Kcnq2;Syt7;Map6;Kcnh5;Pla2g6;Iqgap1;Sptan1;
GO:0005622	748	107	35.0093	3.05633	7.32778e-21	1.02654e-18	cellular_component:intracellular	Scn5a;Zkscan1;Ogt;Inpp5a;Bak1;Trim29;Ttpal;Actn4;Rab27a;Capn8;Grm4;Zkscan17;Cluh;Tom1l2;Blm;Pitpnm3;Tbc1d9b;Arf1;Zmat4;Rab6b;Cbfa2t3;Ddx43;Itpk1;Pitpnm1;Arf3;Cdc23;Kcnh5;Trim71;Park2;Brsk2;Grtp1;Mid1;Trim27;Adgb;Tbc1d2b;Deptor;Kif3c;Irak1bp1;Ptdss2;Dennd2a;Ssc5d;Twf2;Zfp473;Zfp385b;Capn9;Prdm9;Bcl11b;Exosc10;Zfp661;Pex14;Ano4;Smc6;Ank1;Nfix;Trim41;Rabgap1l;Adprhl1;Ncoa7;Smad4;Tbc1d1;Rlbp1;Crhbp;D…
GO:0031410	590	93	27.6143	3.36782	7.64397e-21	1.05205e-18	cellular_component:cytoplasmic vesicle	Tssk2;Rab7;Ica1;Spire2;Syt2;Rab11fip1;Myrip;Otof;Grm4;Sv2b;Tlr9;Lgi3;Spred2;Atp6v1c1;Ist1;Rab6b;Rusc2;Rab12;Park2;Ncs1;Abhd2;March2;Myo1d;Fgfr1;3110043O21Rik;Pacsin1;Clcn7;Fes;Erbb2;Sh3tc2;Srgap2;Arfgef3;Racgap1;Myo6;Baiap2l2;Tecpr1;Gnas;Rab10;Usp6nl;Atp8a1;Syt1;Ykt6;Zdhhc17;Commd1;Amotl2;Amph;Nkd2;Dennd1a;Arap1;Sgk3;Ang;Mmp14;Ptprn2;Slc6a17;Zdhhc8;Rhbg;Ap1m1;Klc1;Rab25;Slc2a8;Hip1;Dapk2;Rab11fip…
GO:0042802	641	97	30.0013	3.2332	1.4381e-20	1.94515e-18	molecular_function:identical protein binding	Ryr2;Mcu;Bak1;Ppp5c;Tyrobp;C1s2;Kcnh1;Akt1;Trim8;Baiap2;Zbtb16;C1s1;Park2;Phykpl;Alk;Gle1;Map3k13;Mid1;Ywhaz;Ptprg;Fgfr1;Trim27;Eed;Erbb2;Nell2;Esyt2;Msi1;Dab2ip;Robo1;Gatsl2;Flnb;Bin1;Fas;Ccdc91;Ass1;Gria1;Smn1;Cd247;Prdx3;Diaph1;Traf2;Syt1;Ripk1;Zdhhc17;Atxn1;Commd1;Amotl2;Mapk1;Entpd2;Shank1;Smad4;Dapk1;Ephb2;Phc2;Smad3;Dapk2;Flt1;Fnbp1;Fhit;Igf1r;Schip1;Stim1;Grik5;Dyrk1a;Slc2a1;Sncaip;Mdm2;S…
GO:0046982	502	84	23.4955	3.57515	2.03806e-20	2.70994e-18	molecular_function:protein heterodimerization activity	Tfeb;Limk2;Btbd11;Hmg20a;Foxp1;Taf4b;Amph;Bak1;Ugt1a6b;Smad4;Ugt1a6a;Ugt1a10;Irak2;Slc7a15;Kcnh1;Hnf1b;Ugt1a1;Zfp423;Smad3;Atp4b;Mef2c;Bmp6;Tbx15;Syt14;Chrac1;Micu2;Tenm3;Top2a;Fam73a;Ppp3ca;Scube1;Kcnb1;Ddit3;Adcy2;Itgb2;Katnb1;Pknox1;Kcnh5;Ctnna1;Smad2;Ikzf4;Ugt1a5;Ppara;Tenm4;Mpp7;Mid1;Tgfb2;Sos1;Scp2;Sox5;Tenm2;Tfap2b;Nectin2;Pbx1;H2afy;Gclc;Erbb2;Prss28;Tenm1;Oaz1;Adra1b;Bin1;Dlg2;Ppard;Thra…
GO:0005925	352	68	16.475	4.12748	1.05172e-19	1.37512e-17	cellular_component:focal adhesion	Sorbs3;Ppfia1;Pxn;Palld;Tgm2;Gna12;Mapk1;Ppfibp1;Actn4;Cspg4;Mmp14;Tns1;Mprip;Epha2;Slc9a1;Arf1;Sdc1;Mpzl1;Flt1;C2cd4b;Itgb5;Ywhag;Focad;Lpp;Akap12;Ppp1r12a;Ezr;Ctnna1;Arhgap22;Syne2;Ywhaz;Ccnd3;Plec;Nectin2;Itga11;Cd9;Fes;Pi4ka;Fhl2;Gna13;Nfasc;Tns3;Flnb;Lims1;Pdlim2;Ptk2;Tns4;Tada1;Itgb3;Cdh13;Itga3;Vcl;Dpp4;Enah;Rab10;Sntb1;Map2k2;Ywhab;Dlc1;Ptk2b;Evl;Arhgap24;Map2k1;Arpc1b;Ptk7;Svil;Iqgap1;Ts…
GO:0045211	218	53	10.2032	5.19443	2.0095e-19	2.58435e-17	cellular_component:postsynaptic membrane	Gabrp;Dlgap2;Sema4f;Scrib;Grip1;Tenm2;Rapsn;Atad1;Lrfn2;Shank1;Nlgn2;Neurl1a;Erbb2;Cadps2;Shank2;Ntrk2;Cnih2;Synpo;Dlg2;Srgap2;Grik4;Arf1;Dlg4;Grid2ip;Gria1;Cnih3;Homer2;Lrrtm4;Gabbr2;Grik3;Glrb;Kctd8;Musk;Gabra5;Nbea;Grid1;Syne1;Ank3;Grik5;Kcnb1;Tanc1;Sipa1l1;Disc1;Chrm5;Faim2;Gabrg3;Glra3;Park2;Ncs1;Cpeb1;Glra1;Clstn3;Ank1;
GO:0005768	535	85	25.0401	3.39456	2.10003e-19	2.65721e-17	cellular_component:endosome	Ccdc93;Rab7;Vps26a;Ap5s1;Pacsin3;Rab11fip1;Rab27a;Ntrk2;Steap3;Tlr9;Kcnh1;Lrp2;Insr;Unc13d;Sorl1;Fgd5;Fgfr4;Ccdc53;Rab12;Trf;Clec16a;Mamdc4;Atp9a;Clcn5;Atp6v0a4;Rab11fip3;Tgfb2;March2;Trim27;3110043O21Rik;Pacsin1;Adcyap1r1;Vta1;Astn2;Cyb561a3;Fig4;Mvb12b;Scamp1;Gnas;Rab10;Usp10;Ykt6;Cptp;Stam2;Crhr1;Slc9a9;Commd1;Amotl2;Tmem192;Atp8a2;Sgk3;Fam21;Rasgef1b;Slc39a4;Mgrn1;Ptp4a3;Zfyve28;Rab11fip4;Ack…
GO:0004713	117	40	5.47605	7.30454	2.47018e-19	3.07596e-17	molecular_function:protein tyrosine kinase activity	Ttn;Ntrk3;Ephb1;Flt1;Aatk;Igf1r;Map2k5;Map2k3;Tyk2;Fgfr1;Musk;Map2k2;Fgfr4;Fer;Kit;Csk;Fes;Erbb2;Dyrk1a;Ephb2;Pdgfra;Mst1r;Ptk2b;Ntrk2;Blk;Map2k1;Egf;Matk;Tesk2;Epha6;Fyn;Epha2;Abl2;Jak3;Txk;Ptk2;Insrr;Eif2ak2;Insr;Alk;
GO:0003676	762	104	35.6645	2.91606	4.7685e-19	5.84514e-17	molecular_function:nucleic acid binding	Snd1;Prdm6;Zkscan1;Zbtb7c;Chd4;Ptbp3;Zkscan17;Sugp2;Neil1;Blm;Eri3;Zfp423;Zfp148;Hdlbp;Rbms3;Celf4;Ddx10;Zmat4;Zbtb8a;Tbk1;Klf9;Zcchc24;Zbtb20;Rbbp6;Ddx39b;Khsrp;Safb;Zeb2;Aebp2;Msi1;Klf12;Bcl11a;Dhx33;Prdm14;Zeb1;Cpsf1;Rbm19;Helq;Zfp521;Gli2;Zfp473;Zfp385b;Celf2;Hnrnpab;Rbm38;Aen;Zfhx3;Rnps1;Prdm9;Bcl11b;Exosc10;Zfp661;Aars2;Glis1;Pole;Rpa1;Cpeb1;Eif4h;Hivep3;Pprc1;Zfp64;Zfp821;Gli3;Ang;Prdm10;E…
GO:0009986	593	89	27.7547	3.20667	7.78897e-19	9.40068e-17	cellular_component:cell surface	Ptprj;Scn5a;Kcnk2;Cd74;Cyp2w1;Ptn;Otoa;Tyrobp;Ntrk2;Slc11a1;Tgfbr3;Kcnh1;Slc9a1;Sdc1;Mpzl1;Cdon;Ace2;Kit;Kcnq2;Pdgfra;Mst1r;Trf;Vcan;Nid2;Kcnh5;Gp1ba;Dpp6;Tgfb2;Bsn;Rtn4rl1;Adcyap1r1;Rtn4rl2;B4galt1;Wnt7b;Sulf1;Robo1;Fas;Clmp;Defb25;Ptprt;Gria1;Itga3;Asic1;Tspear;Ncam1;Wnt5b;Cntnap2;Entpd2;Lrfn2;Wnt7a;Cspg4;Ramp1;Tspan14;Epha2;Ackr3;Tnr;Itgb5;Scube1;Ank3;Ngfr;Hfe2;Boc;Itgb2;Ece1;Anxa2;Clstn3;Scnn…
GO:0046777	177	47	8.28428	5.6734	1.06108e-18	1.26124e-16	biological_process:protein autophosphorylation	Map3k13;Tssk2;Ntrk3;Camk2a;Aatk;Prkca;Fgfr1;Myo3b;Fes;Erbb2;Mknk1;Dapk1;Ntrk2;Irak2;Nek6;Camk2b;Fyn;Ulk1;Txk;Csnk2a1;Ptk2;Insrr;Map4k1;Insr;Tnik;Ephb1;Flt1;Igf1r;Camk4;Musk;Lrrk2;Mark2;Fgfr4;Fer;Kit;Wnk2;Csk;Dyrk1a;Lmtk2;Smg1;Pdgfra;Ripk1;Acvr1b;Jak3;Stk25;Eif2ak2;Alk;
GO:0019901	429	73	20.0788	3.63567	2.44591e-18	2.8639e-16	molecular_function:protein kinase binding	Ptprj;Ryr2;Prkce;Scn5a;Pxn;Hdac4;Mapk1;Mapt;Tex14;Gcn1l1;Cspg4;Plcg1;Nek6;Tom1l2;Kcnh1;Camk2b;Cks1brt;Akt1;Spred2;Ulk1;Cd6;Insr;Dlg4;Smad3;Kidins220;Ptprr;Cacnb2;Musk;Nbea;Rptor;Itgb2;Sipa1l1;Ppp1r12a;Map3k5;Slc12a7;Kif13b;Park2;Ncs1;Brsk2;Ywhaz;Ccnd3;Map2k3;Skap1;Cyld;Mag;Aurka;Ap2a2;H2afy;Gstp1;B4galt1;Ccnk;Ptpn1;Dab2ip;Bcl11a;Lims1;Spdye4b;Ptk2;Racgap1;Ttn;Gria1;Trp73;Prdx3;Traf2;Brsk1;Fer;Rcc…
GO:0003674	7650	549	358.049	1.53331	1.03363e-17	1.19248e-15	molecular_function:molecular_function	Wdr63;Mettl13;Ap5s1;1700001L05Rik;4930467E23Rik;Mettl22;Ldlrad1;Vash2;1700024B05Rik;Pithd1;BC030867;Nol4l;D430042O09Rik;9530057J20Rik;Tmcc1;C1qtnf7;Pcdhga2;Xxylt1;Dock6;A230087F16Rik;Pcdhgb6;Btbd7;Pcdhga11;Hs3st2;Tns3;Gm5065;Ankrd49;Defb25;Vmn2r2;Ttc22;Ttc7b;Fam173b;Sdk1;Gm9125;Tmem255b;Spocd1;Begain;Mab21l3;G430095P16Rik;Luzp2;Fam222a;Cfap46;Sipa1l3;Ppp4r1;Gm9222;Lrriq3;Dnah7a;Tanc2;Mipol1;Morn1…
GO:0005576	1640	167	76.7583	2.17566	1.79782e-17	2.04404e-15	cellular_component:extracellular region	Fam19a5;Col26a1;Acp7;Cpz;Dnpep;Ifna12;Spon1;Vash2;Lgi3;Nrg3;Mamdc2;Ltbp4;Col4a2;Ace2;Sorl1;Lect1;Vcan;Thbs4;Nid2;C1qtnf7;Pltp;C1s1;Azgp1;Oit1;Hmcn2;Fcna;B4galt1;Prss28;Chrdl2;Lamc2;Igfbp6;Col6a1;Fas;Adamts12;Defb25;Gpc5;Crtac1;Fbn1;Rspo1;Luzp2;Fgf9;Gdnf;Eda;Tll1;Slit3;Wnt5b;Muc4;Gpc6;Glt1d1;Ang;Enox1;Col19a1;Crhbp;Thbs3;Muc2;Rnase4;Tinagl1;Lrp8;Anxa2;Pomc;Lama5;Pdzd2;Col6a6;Fbn2;Col5a1;Lama1;Adam…
GO:0015629	194	47	9.07994	5.17624	2.27528e-17	2.54994e-15	cellular_component:actin cytoskeleton	Crk;Mtss1;Rab22a;Palld;Baiap2l1;Rai14;3110043O21Rik;Coro6;Actn4;Myrip;Dapk1;Fhl2;Cdc42ep3;Mprip;Pdlim2;Synpo;Abl2;Ctnna2;Notch3;Clic5;Baiap2;Dst;Crocc;Baiap2l2;Klhl2;Vcl;Dennd2a;Mad1l1;Pknox2;Enah;Ppp1r9b;Msra;Fer;Ccdc53;Nfatc2;Ell;Rara;Arpc1b;Ppp1r12a;Cttnbp2;Ezr;Mylk3;Ctnna1;Cgnl1;Bmf;Svil;Iqgap1;
GO:0043231	741	98	34.6816	2.8257	3.70947e-17	4.0987e-15	cellular_component:intracellular membrane-bounded organelle	Rab7;Casp7;Vps26a;Syt2;Ppp5c;Rab11fip1;Mettl22;Runx1;Casz1;Nek6;Cyp2d11;Zmiz1;Slc37a4;Trim8;Insr;Smarca2;Col4a2;Itpr1;Ccdc53;Atp2b1;Vcan;Ncs1;Ptgs1;Rps6kl1;Rab11fip3;Golga1;Acox2;Scp2;Litaf;Nlrp2;Mta1;Myo6;Dpm1;Scamp1;Mta3;Glb1;Zfp326;Nup35;Atp8a1;Zfhx3;Pex14;Zdhhc17;Muc5b;Stam2;Atxn1;Tmem192;Ugt1a6b;Prex1;Fam21;Ugt1a6a;Ugt1a1;Dab1;Hip1;Mef2c;Ackr3;Sun1;Pomp;Igf1r;Abca15;Ptprf;Atp2b4;Gtf2f1;Rptor…
GO:0045892	479	74	22.419	3.30077	1.45825e-16	1.58889e-14	biological_process:negative regulation of transcription, DNA-templated	Nacc2;Prdm6;Hdac4;Foxp1;Sin3a;Ldb1;Tbx20;Tceal7;Twist2;Gli3;Smad4;Nr2c1;Runx1;Dkk3;Hdac9;Rreb1;Zfp423;Zfp148;Smarca2;Ppargc1b;Cbfa2t3;Zbtb16;Ddit3;Zbtb20;Whsc1l1;Ehmt1;Glis2;Smad2;Zp3;Mdm2;Ikzf4;Gatad2a;Kctd1;Dnmt1;Ctbp2;Capn3;Dach1;Sox5;Tfap2b;Gclc;Plcb1;Fhl2;Ptch1;Dab2ip;Nipbl;Ctbp1;Pax2;Lims1;Nfic;Ncoa2;Pax5;Gas6;Cux2;Thra;Foxp2;Dmbx1;Zeb1;Wwp2;Mta3;Wnt5a;Ywhab;Tbx2;Foxk1;Runx2;Rara;Rps6ka5;Nr…
GO:0044822	1067	121	49.9397	2.42292	3.12976e-16	3.36343e-14	molecular_function:RNA binding	Wdr33;Srpk2;Edf1;Actn4;Sugp2;Bop1;Arf1;Mrps9;Stau2;Ncbp3;Papd5;Zcchc24;Mtcl1;Rbbp6;Eif3c;Eftud2;Crkl;Gigyf2;Drosha;Safb;Flnb;Prpf6;Rbm19;Zfp326;Mark2;Twf2;Diaph1;Rcc2;Rnps1;Exosc10;Supt5;Cdc40;Myo18a;Ntpcr;Tns1;Mettl16;Sorbs2;Eif4g3;Gtpbp1;Ywhag;Syne1;Oasl1;Anxa2;Ascc3;Ctnna1;Igf2bp3;Ccdc108;Raly;Dido1;A430105I19Rik;Plec;Sltm;Rbm4b;Pcdhga9;Ndufv3;Hnrnpf;Smg1;Ubc;Pphln1;Eif4enif1;Kmt2c;Zc3h7b;Snd1…
GO:0005615	1353	142	63.3256	2.24238	3.73725e-16	3.96199e-14	cellular_component:extracellular space	Actn4;Cpz;Ifna12;Spon1;Lrp2;Nrg3;Ltbp4;D430042O09Rik;Ace2;Gm13275;Sorl1;Kit;Mtcl1;Vcan;Thbs4;C1qtnf7;Pltp;Gle1;Azgp1;Ptprg;B4galt1;Prss28;Ces2g;Chrdl2;Lamc2;Igfbp6;Fas;Man2b1;Ggt1;Glb1;Abca3;Fbn1;Rspo1;Sil1;Fgf9;Sema4d;Gdnf;Sipa1l3;Sema4f;Slit3;Wnt5b;Muc4;Ang;Ramp1;Crhbp;Anxa13;Rab11fip4;Tinagl1;Lrp8;Hfe2;Anxa2;Pomc;Lama5;Fam178a;Lama1;Alpl;Ssh2;Pdgfd;Gas6;Podn;Gcnt1;Pnliprp2;Col23a1;Ubc;Vwf;Col2…
GO:0004984	1113	5	52.0927	0.095983	7.45955e-16	7.80269e-14	molecular_function:olfactory receptor activity	Olfr374;Olfr1337;Olfr457;Olfr56;Olfr668;
GO:0006915	556	79	26.0229	3.03578	9.11403e-16	9.40783e-14	biological_process:apoptotic process	Cradd;Bre;Casp7;Ogt;Chia1;Mapt;Bak1;Steap3;Nek6;Akt1;Stk3;Epb41l3;Sh3rf1;Naip1;Itpr1;Gulp1;Ppp2r2b;Map3k5;Sema6a;Brsk2;Bcl7c;Dnase1l3;Litaf;Hipk2;Shf;Dab2ip;Sulf1;Sgms1;Fas;Tns4;Cadm1;Traf2;Zfp385b;Dlc1;Aen;Ripk1;Ncf1;Lsp1;Aatk;Prkca;Mapk1;Card14;Pea15a;Dapk1;Rad21;Csrnp3;Elmo1;Epha2;Muc2;Unc5c;Hip1;Mef2c;Dapk2;Mfn2;Fhit;Sp110;Ddit3;Ngfr;Ece1;Faim2;Dido1;Cyfip2;Sltm;Zc3h12a;Fam162a;Naip5;Ppard;Ww…
GO:0007507	231	48	10.8117	4.43964	1.82338e-15	1.85772e-13	biological_process:heart development	Ptprj;Ntrk3;Dync2h1;Foxp1;Tgfb2;Dnah11;Casp7;Mapk1;Pde2a;Mib1;Ift172;Nfatc3;Erbb2;Nfatc1;Gli3;Hdac9;Robo1;Nipbl;Cacna1c;Lrp2;Nf1;Mkl2;Mef2c;Ncoa6;Ttn;Nrp2;Map2k5;Gna11;Fbn1;Prkar1a;Txnrd2;Gli2;Map2k2;Ccm2;Map2k1;Ece1;Vcan;Ptk7;Cc2d2a;Smarca4;Smad2;Mdm2;Mthfd1;Pbrm1;Gnaq;Alpk3;Asxl2;Crkl;
GO:0015031	578	80	27.0526	2.9572	2.18259e-15	2.19519e-13	biological_process:protein transport	Ccdc93;Rab7;Kif18a;Spire2;Vps26a;Bbs9;Ap5s1;Atg16l2;Actn4;Rab11fip1;Kpna1;Rab3c;Tomm20;Tom1l2;Rab3b;Vps13b;Ist1;Arf1;Sec24a;Rab6b;Cog5;Ccdc53;Myo5b;Pitpnm1;Rab12;Arf3;Nup98;Dopey2;Gle1;Sys1;Ap2a2;Vta1;Ttc8;Mvb12b;Ccdc91;Jakmip1;Myo6;Scamp1;Agap1;Dennd2a;Rab10;Nup133;Ykt6;Ap4s1;Sil1;Pex14;Stam2;Nup160;Commd1;Lrsam1;Stxbp3;Dennd1a;Fam21;Ramp1;Ap1m1;Rab25;Timm9;Atg10;Apba2;Copg2;Xpo4;Uso1;Rab22a;Gri…
GO:0016477	188	43	8.79912	4.88685	2.81311e-15	2.79352e-13	biological_process:cell migration	Palld;Col5a1;Tgfb2;Scrib;Myo18a;Tyk2;Vav3;Lrrc16a;Gpc6;Adgrg1;Ang;Mmp14;Cdc42bpb;Plcg1;Tns3;Elmo1;Sorbs2;Epha2;Abl2;Adamts12;Sdc1;Itgb3;Flt1;Wnt5a;Ppp1r9b;Ptprf;Sirpa;Vav2;Sorl1;Erg;BC067074;Fgfr4;Csk;Nfatc2;Pdgfra;Srgap1;Matk;Ptk7;Depdc1b;Lama5;Rasgef1a;Jak3;Wwc1;
GO:0043066	480	71	22.4658	3.16035	4.02719e-15	3.94916e-13	biological_process:negative regulation of apoptotic process	Prkce;Cd74;Map4k4;Myo18a;Card14;Sin3a;Wnt7a;Twist2;Muc4;Gli3;Dapk1;Apbb2;Rxfp2;Hnf1b;Akt1;Tert;Slc9a1;Smad3;Stk40;Camk1d;Sh3rf1;Igf1r;Naip1;Glp1r;Ngfr;Naa15;Mre11a;Ctnna1;Mdm2;Gnaq;Eif2ak2;Cbs;Ints1;Adamts20;Pias1;Asic2;Capn3;Tgfb2;Tfap2b;Aurka;Gclc;Erbb2;Fhl2;Gstp1;Blk;Aipl1;Pax2;Lims1;Atg7;Fas;Gas6;Ppard;Ptk2;Ahi1;Rarb;Chst11;Wnt5a;Pcid2;Prdx3;Gli2;Traf2;Aven;Kcnj1;Rara;Ptk2b;Pdxk;Bcl11b;Smarca…
GO:0003700	852	101	39.8769	2.5328	6.32096e-15	6.12196e-13	molecular_function:DNA-binding transcription factor activity	Foxp1;Zkscan1;Elf5;Myrfl;Taf4b;Sin3a;Tbx20;Twist2;Runx1;Zkscan17;Foxn3;Hnf1b;Zfp148;Mkl2;Tbx15;Cbfa2t3;Zbtb16;Bach2;Tfcp2;Batf;Pbx3;Myog;Tead4;Gtf2ird1;Dach1;Pax7;Tfap2b;Mesp2;Zfp189;Nfatc1;Tcf20;Mta1;Klf12;Zfp7;Pax2;Zeb1;Mkl1;Esrrb;Mta3;Dmrtc1a;Zfp957;Elmsan1;Gli2;Tbx2;Foxk1;Hnrnpab;Runx2;Zfp970;Rara;Nr1h2;Zfp661;Nr2c2;Nfix;Tfeb;Hivep3;Nfatc3;Btbd8;Zfp821;Gli3;Smad4;Nr2c1;Ebf1;Csrnp3;Rreb1;Myt1l…
GO:0043235	134	36	6.27171	5.74006	7.64284e-15	7.31196e-13	cellular_component:receptor complex	Ntrk3;Fgfr1;Lrp1b;Adcyap1r1;Gpr160;Erbb2;Itgb6;Ntrk2;Tgfbr3;Ptprn2;Egf;P2rx3;Ramp1;Ror1;Lrp2;Notch3;Insrr;Insr;Smad3;Itgb3;Itga3;Flt1;Igf1r;Lrp8;Kctd8;Musk;Gabra5;Pex5l;Itgb5;Itpr3;Itpr2;Itgb2;Acvr1b;Ripk1;Gdnf;Tshr;
GO:0005085	151	38	7.06738	5.37682	8.30426e-15	7.84902e-13	molecular_function:guanyl-nucleotide exchange factor activity	Dennd2c;Sos1;Vav3;Iqsec1;Plce1;Dennd1a;St5;Ngef;Trio;Prex1;Rapgef5;Arhgef15;Abr;Itsn1;Elmo1;Dock9;Farp2;Arhgef10l;Rasgef1b;Arfgef3;Ralgps1;Prex2;Dennd2a;Eif2b3;Rapgef4;Arhgef40;Dock8;Vav2;Fgd5;Arhgef3;Ric1;Farp1;Tiam2;Kalrn;Fgd3;Mcf2l;Dock3;Dock6;
GO:0005874	308	54	14.4156	3.74595	1.72934e-14	1.60391e-12	cellular_component:microtubule	Dync2h1;Kif18a;Nin;Mapt;Dync2li1;Crhbp;Eml5;Klc1;Stau2;Tekt4;Dnah17;Invs;Dnah12;Eml2;Kifc3;Ttll8;Stim1;Dnah8;Map9;Katnb1;Map6;Disc1;Tbcd;Spag4;Klc3;Mid1;Eml1;Cyld;Kcnab2;Clip2;Aurka;Lrrc49;Ttll5;Nckap5l;Incenp;Mta1;Tubgcp2;Ncoa2;Cspp1;Jakmip1;Dst;Kif3c;Mtus2;Shtn1;Dync1i1;Map2k2;Gtse1;Rcc2;Haus4;Tbca;Map2k1;Kif9;Iqgap1;Kif26b;
GO:0005102	405	63	18.9556	3.32356	1.73783e-14	1.60391e-12	molecular_function:signaling receptor binding	Prkce;Slit3;Wnt5b;Tyk2;Wnt7a;Ephb2;Tyrobp;Ang;Wnt8a;Lama4;Nrg3;Dlg4;Wnt9a;Gm8909;Eml2;Itgb5;Syne1;Fgf12;Hfe2;Ptpa;Pomc;Lama5;Mtss1;Slit1;Capn3;Acox2;Tgfb2;Grip1;Lama1;Scp2;Tenm2;Nectin2;Lif;Mag;Fes;Blk;Wnt7b;Lama2;Fyn;Cd276;Ncoa2;Ptprd;Gas6;Ptk2;Cadm1;Smarcd3;Fgf17;Dpp4;Wnt5a;Epb41l1;Abca12;Nectin4;Rspo1;Traf2;Fer;Csk;Rara;Ptk2b;Matk;Fgf9;Pex14;Sema4d;Jak3;
GO:0006816	139	36	6.50573	5.53358	1.96324e-14	1.79088e-12	biological_process:calcium ion transport	Ryr2;Cdh23;Camk2a;Mcu;Cacng2;Kcnn4;Nfatc1;Slc24a3;Atp2b2;Plcg1;Ramp1;Cacna1a;Cacna2d4;Trpm6;Camk2b;Ryr1;Cacna1c;Tpcn1;Cacna1s;Cacnb2;Cacna2d3;Atp2b4;Ppp3ca;Stim1;Itpr1;Atp2b1;Asic1;Itpr3;Itpr2;Cacna1d;Cacna1b;Catsper2;Slc24a2;Cacng1;Cacng4;Cacna2d2;
GO:0055085	344	57	16.1005	3.54026	2.79788e-14	2.52292e-12	biological_process:transmembrane transport	Ryr2;Scn5a;Slc9a9;Kcnq5;Scn8a;Slc24a3;Slc22a13;Sv2b;Slc23a2;Kcnh1;Cacna1a;Trpm6;Slc39a4;Kcnab1;Slc9a1;Slc25a26;Kcnc4;Slc37a4;Slc2a8;Slc39a8;Slc47a1;Slc9a8;Slc39a14;Kcnq1;Itpr1;Kcnb1;Kcnq2;Slc2a10;Itpr2;Cacna1d;Slc23a3;Catsper2;Slc2a1;Kcnh5;Slc12a7;Clcn5;Slc30a7;Trpm5;Slc30a2;Clcn7;Slc12a8;Kcnq4;Ryr1;Slc9a7;Cacna1c;Tpcn1;Cacna1s;Oca2;Slc45a1;Slc25a13;Slc2a13;Itpr3;Slc12a9;Cacna1b;Sfxn5;Slc22a3;Slc…
GO:0034765	133	35	6.22491	5.62257	2.9913e-14	2.66668e-12	biological_process:regulation of ion transmembrane transport	Scn5a;Asic2;Kcnq5;Kcnip4;Kcnab2;Clic6;Cacng2;Scn8a;Kcnh1;Cacna1a;Cacna2d4;Kcnk13;Kcnq4;Cacna1c;Tpcn1;Cacna1s;Kcnj6;Kcnab1;Clic5;Kcnc4;Wwp2;Cacnb2;Kcnq1;Cacna2d3;Kcnb1;Kcnj1;Kcnq2;Cacna1d;Cacna1b;Catsper2;Kcnh5;Cacng1;Cacng4;Cacna2d2;Trpm5;
GO:0007411	134	35	6.27171	5.58061	3.60807e-14	3.18037e-12	biological_process:axon guidance	Slit1;Sema4f;Slit3;Tgfb2;Gli3;Smad4;Ephb2;Apbb2;Lama2;Nfasc;Ttc8;Robo1;Robo2;Plxna4;Unc5c;Crmp1;Ephb1;Unc5d;Ptpro;Enah;Nrp2;Wnt5a;Gli2;Ank3;Efnb3;Lmtk2;Ngfr;Dpysl5;Boc;Evl;Chl1;Cdh4;Sema6a;Kif26b;Efna5;
GO:0003682	448	66	20.9681	3.14764	4.13782e-14	3.6068e-12	molecular_function:chromatin binding	Camta2;Hdac4;Cbx7;Foxp1;Bcas3;Sin3a;Ldb1;Atad2b;Twist2;Nfatc3;Gli3;Smad4;Rad21;Smad3;Mef2c;Prdm11;Mbd5;Smarca2;Cbfa2t3;Top2a;Erg;Nfatc2;Crebbp;Setd7;Hdgfrp2;Exo1;Ncoa1;Smad2;Pbrm1;Dnmt1;Ctbp2;Eed;Trrap;Tfap2b;Ppargc1a;Safb;H2afy;Tnrc18;Nfatc1;Zc3h12a;Mta1;Nipbl;Auts2;Ncoa2;Ncoa6;Tshz2;Zeb1;Smarcd3;Mta3;Setdb1;Trp73;Ebf2;Gli2;Runx2;Phf21b;Orc1;Eya3;Suv39h2;Supt5;Dlx2;Smarca4;Kat2b;Pole;Rpa1;Nelfa;…
GO:0003723	728	89	34.0732	2.61202	6.39982e-14	5.51721e-12	molecular_function:RNA binding	Cbx7;Larp1;Sin3a;Eya1;Eif4e3;Ppp5c;Ptbp3;Sugp2;Hdlbp;Rbms3;Celf4;Stau2;Nudt16l1;Ddx10;Zmat4;Ncbp3;Nup98;Snrpn;Eif3c;Trim71;Rpusd2;Ddx39b;Khsrp;Drosha;Safb;Wrap53;Lsm1;Msi1;Mrpl39;Prdm14;Jakmip1;Cpsf1;Prpf6;Rbm19;Smn1;Larp4b;Zfp385b;Celf2;Hnrnpab;Rbm38;Rnps1;Adat1;Gemin5;Exosc10;Aars2;Mov10l1;Kdm2b;Cpeb1;Atxn1;Eif4h;Rae1;Pprc1;Ang;Tert;Dazap1;Rbm27;Ythdc2;Henmt1;Ctif;Ppargc1b;Eif4g3;Trub1;Oasl1;Ig…
GO:0007608	1139	8	53.3096	0.150067	8.13781e-14	6.93925e-12	biological_process:sensory perception of smell	Olfr374;Olfr1337;Ttc8;Mkks;Pde1c;Olfr457;Olfr56;Olfr668;
GO:0016569	264	48	12.3562	3.88469	1.4274e-13	1.20408e-11	biological_process:covalent chromatin modification	Prdm6;Hdac4;Bre;Cbx7;Hmg20a;Ogt;Eya1;Rbl2;Chd4;Chd7;Tet3;Hdac9;Setd3;Padi4;Rbl1;Phf20;Chd9;Smyd3;Eya4;Emsy;Whsc1l1;Hdac8;Setd7;Tlk2;Ehmt1;Pbrm1;Dnmt1;Tet1;Eed;Trrap;H2afy;Aebp2;Kansl1;Smarcb1;Fam175a;Smarcd3;Setdb1;Kdm4b;Prdm9;Vprbp;Dpf3;Kdm2b;Eya3;Suv39h2;Smarca4;Kmt2c;Baz2a;Ash2l;
GO:0070588	87	28	4.07193	6.87634	1.76032e-13	1.46912e-11	biological_process:calcium ion transmembrane transport	Ryr2;Mcu;Cacnb2;Cacna2d3;Cacng2;Atp2b4;Itpr1;Atp2b1;Asic1;Itpr3;Slc24a3;Itpr2;Cacna1d;Atp2b2;Cacna1b;Cacna1a;Cacna2d4;Trpm6;Catsper2;Slc24a2;Ryr1;Cacna1c;Tpcn1;Cacng1;Cacna1s;Gas6;Cacng4;Cacna2d2;
GO:0008289	251	46	11.7478	3.91564	3.50144e-13	2.89145e-11	molecular_function:lipid binding	Paqr5;Myo1e;Ogt;Scp2;Inpp4b;Iqsec1;Osbpl6;Dennd1a;Ap2a2;Zfyve26;Pacsin1;Pard3;Pacsin3;Fes;Osbpl10;Cadps2;Esyt2;Pitpnb;Bpifa3;Serpina6;Pitpnm3;Osbp2;Mvb12b;Ppard;Nf1;Osbpl2;Racgap1;Baiap2l2;Tecpr1;Acot11;Fnbp1;Osbpl9;Mark2;Traf2;Fer;Dlc1;Fabp12;Cptp;Pitpnc1;Pitpnm2;Pltp;Mcf2l;Ppara;Ncf1;Stard13;Ptgs1;
GO:0005913	314	52	14.6964	3.53828	3.61424e-13	2.95351e-11	cellular_component:cell-cell adherens junction	Snd1;Larp1;Baiap2l1;Scrib;Capzb;Ppfibp1;Trim29;Gcn1l1;Mprip;Epha2;Ist1;Hdlbp;Baiap2;Mkl2;Fat2;Anxa2;Mre11a;Ezr;Ctnna1;Crkl;Mpp7;Uso1;Gigyf2;Ywhaz;Plec;Pard3;Mllt4;Pi4ka;Esyt2;Ptpn1;Dab2ip;Dock9;Flnb;Ctnna2;Notch3;Myo6;Arhgap1;Cadm1;Vcl;Shtn1;Rab10;Epb41l1;Nectin4;Mark2;Twf2;Ywhab;Erc1;Ykt6;Ppl;Iqgap1;Eif4h;Sptan1;
GO:0010976	131	33	6.1313	5.38222	4.42545e-13	3.57914e-11	biological_process:positive regulation of neuron projection development	Fgfr1;Ptn;Lif;Fes;Atp8a2;Ntrk2;Acsl6;Dab2ip;Camk2b;Fyn;Fig4;Abl2;Kif3c;Ahi1;Kidins220;Mob2;Camk1d;Itga3;Tenm3;Wnt5a;Mark2;Twf2;Negr1;Fam150a;Magi2;Ngfr;Ptk2b;Katnb1;Cntn1;Ptk7;Disc1;Kat2b;Cpeb1;
GO:0019899	372	57	17.411	3.27379	4.92487e-13	3.94241e-11	molecular_function:enzyme binding	Ryr2;Prkce;Scn5a;Pde4dip;Prkca;Tnks2;Cntnap2;Ldb1;Mapt;Pias3;Prima1;Akt1;Tspan14;Ugt1a1;Smad3;Ldb2;Top2a;Ppp3ca;Syne1;Mylk;Mst1r;Ncoa1;Mdm2;Park2;Mcm2;Cbs;Crk;Pias1;Capn3;Plce1;H2afy;Trio;Plcb1;Hlcs;Ptpn1;Cyb5a;Oaz1;Fyn;Ryr1;Cacna1c;Rfc4;Notch3;Wwox;Itgb3;Ttn;Cpsf1;Wdr70;Traf2;Ywhab;Casc3;Rara;Ptk2b;Zfhx3;Glud1;Supt5;Kalrn;Ank1;
GO:0005216	167	37	7.81624	4.73373	5.14131e-13	4.0741e-11	molecular_function:ion channel activity	Ryr2;Scn5a;Asic2;Kcnq5;Clcn7;Scn8a;P2rx3;Kcnh1;Cacna1a;Trpm6;Ryr1;Kcnq4;Cacna1c;Tpcn1;Cacna1s;Kcnc4;Grik4;Gria1;Grik3;Kcnk3;Kcnq1;Gabra5;Fxyd3;Grid1;Itpr1;Grik5;Kcnb1;Asic1;Itpr3;Kcnq2;Itpr2;Cacna1d;Cacna1b;Catsper2;Kcnh5;Clcn5;Trpm5;
GO:0005244	132	33	6.17811	5.34144	5.29124e-13	4.15098e-11	molecular_function:voltage-gated ion channel activity	Scn5a;Kcnq5;Kcnip4;Kcnab2;Clic6;Cacng2;Scn8a;Kcnh1;Cacna1a;Cacna2d4;Kcnk13;Kcnq4;Cacna1c;Tpcn1;Cacna1s;Kcnj6;Kcnab1;Clic5;Kcnc4;Cacnb2;Kcnq1;Cacna2d3;Kcnb1;Kcnj1;Kcnq2;Cacna1d;Cacna1b;Catsper2;Kcnh5;Cacng1;Cacng4;Cacna2d2;Trpm5;
GO:0016874	362	56	16.943	3.3052	5.54004e-13	4.30313e-11	molecular_function:ligase activity	Trim41;Lrsam1;Pias3;Ctps;Rnf180;Fars2;Gss;Dph6;Dtx2;Mgrn1;Trim8;March4;Sh3rf1;Rnf43;Ttll8;Atg10;Rnf149;Ube2cbp;Sh3rf2;Rbbp6;Rnf220;Pdzrn3;Mdm2;Trim71;Mthfd1;Park2;Pias1;Trim32;Mid1;Rnf185;March2;Trim27;Mib1;Ttll5;Gclc;Neurl1a;Acsf3;Acacb;Hlcs;Wars;Acsl6;Ass1;Wwp2;Acsbg1;Aars;Sars2;Lars2;Kcmf1;Traf2;Rnf130;Slc27a1;Fancl;Aars2;Arih2;Gars;Hace1;
GO:0008285	363	56	16.9898	3.2961	6.11245e-13	4.7012e-11	biological_process:negative regulation of cell proliferation	Ptprj;Nacc2;Hdac4;Slit3;Prkca;Erdr1;Bak1;Twist2;Gli3;Smad4;Adgrg1;Runx1;Rxfp2;Muc2;Smad3;Stk3;Smarca2;Wnt9a;Gjb6;Cbfa2t3;Clmn;Ptprf;Zbtb16;Magi2;Ror2;Myog;Smad2;Pbrm1;Eif2ak2;Tgfb2;Tfap2b;Lif;Cd9;Neurl1a;B4galt1;Ptch1;Dab2ip;Robo1;Ptpru;Smarcb1;Nf1;Cdh13;Zeb1;Rarb;Podn;Wnk2;Dlc1;Csk;Rara;Ptk2b;Map2k1;Bcl11b;Dfna5;Kat2b;Raf1;Cpeb1;
GO:0098641	277	48	12.9647	3.70237	6.62937e-13	5.04926e-11	molecular_function:cadherin binding involved in cell-cell adhesion	Snd1;Larp1;Baiap2l1;Scrib;Capzb;Ppfibp1;Trim29;Gcn1l1;Mprip;Epha2;Ist1;Hdlbp;Baiap2;Mkl2;Anxa2;Mre11a;Ezr;Ctnna1;Crkl;Mpp7;Uso1;Gigyf2;Ywhaz;Plec;Mllt4;Pi4ka;Esyt2;Ptpn1;Dab2ip;Dock9;Flnb;Ctnna2;Notch3;Myo6;Arhgap1;Vcl;Shtn1;Rab10;Epb41l1;Mark2;Twf2;Ywhab;Erc1;Ykt6;Ppl;Iqgap1;Eif4h;Sptan1;
GO:0008152	439	62	20.5469	3.01749	1.17558e-12	8.86774e-11	biological_process:metabolic process	Mettl13;Lpgat1;Hadhb;Chia1;Aldh7a1;Pde10a;Ugt1a6a;Papss1;Neil1;Ugt1a1;Tph1;Nt5c2;Camk1d;Pla2g4e;Chil3;Myo5b;Pnpla5;Nceh1;Man2b2;Hoga1;Aldh9a1;Mthfd1;Alkbh8;Acad10;Dnmt1;Ctbp2;Bcat2;Tkt;Engase;Acox2;Pde5a;Scp2;Pde2a;Alpl;Hadha;Hk2;Mthfr;Gpam;Acsf3;Acacb;Gstp1;Hlcs;Zc3h12a;Acsl6;Sulf1;Ctbp1;Gstz1;Man2b1;Ugt1a2;Gns;Acsbg1;Hyal3;Glb1;Bckdhb;Ugt1a7c;Aco2;Slc27a1;Enpp6;Ugt1a9;Pnpla3;Aldh1l1;Pla2g6;
GO:0017137	122	31	5.71007	5.42901	1.82019e-12	1.35994e-10	molecular_function:Rab GTPase binding	Rab11fip4;Grtp1;Rab11fip3;Unc13d;Rusc2;Rabgap1l;Pex5l;Usp6nl;Dennd1a;Adprhl1;3110043O21Rik;Tbc1d9;Fer;Myo5b;Rab11fip1;Als2cl;Myrip;Ccdc64;Ngfr;Erc1;Tbc1d1;Ric1;Anxa2;Tbc1d22a;Ulk1;Tbc1d16;Tbc1d9b;Tbc1d2b;Hace1;Evi5l;Mical3;
GO:0008134	330	52	15.4453	3.36673	1.92277e-12	1.42303e-10	molecular_function:transcription factor binding	Camta2;Sorbs3;Med12l;Hdac4;Mapk1;Ogt;Bcas3;Sin3a;Pprc1;Ift172;Nfatc3;Chd4;Apbb2;Hdac9;Smad3;Ppargc1b;Rbl1;Gtf2f1;Nfatc2;Ddit3;Crebbp;Hdac8;Ncoa1;Smad2;Kctd1;Ppara;Pias1;Ywhaz;Ppargc1a;Nfatc1;Fhl2;Ctbp1;Pax2;Atg7;Ncoa2;Ppard;Thra;Zeb1;Wwp2;Smarcd3;Esrrb;Hnrnpf;Trp73;Lcor;Elmsan1;Runx2;Figla;Rara;Smarca4;Kat2b;Nab2;Rora;
GO:0008150	7257	490	339.655	1.44264	2.02436e-12	1.48422e-10	biological_process:biological_process	Wdr63;Mettl13;1700001L05Rik;4930467E23Rik;Mettl22;Acp7;Ldlrad1;Pitpnm3;1700024B05Rik;Asb14;Pithd1;Dnah17;BC030867;Nol4l;D430042O09Rik;9530057J20Rik;Tmcc1;Vgll4;Xxylt1;Dock6;A230087F16Rik;Pcdhgb6;Pcdhga11;Gm5065;Vmn2r2;Ttc22;Fam173b;Gm9125;Tmem255b;Begain;Mab21l3;Dlgap4;G430095P16Rik;Luzp2;Fam222a;Ppp4r1;Gm9222;Lrriq3;Dnah7a;Tmem192;Mipol1;Morn1;4933416M07Rik;Anxa13;Heatr3;Igf1os;Dytn;Hmgxb3;Zfp23…
GO:0006974	411	59	19.2364	3.06711	2.19869e-12	1.59711e-10	biological_process:cellular response to DNA damage stimulus	Bre;Wdr76;Mapk1;Ap5s1;Eya1;Zfyve26;Rad21;Neil1;Akt1;Dclre1c;Blm;Immp2l;Top2a;Eya4;Emsy;Nfatc2;Ccdc13;Usp28;Setd7;Batf;Rbbp6;Fto;Exo1;Mre11a;Tlk2;Ascc3;Gtf2h2;Alkbh8;Ddx39b;Npas2;Nuggc;Fam178a;Vav3;Atmin;Hipk2;Ccnk;Zc3h12a;Nuak1;Nipbl;Fanci;Fancd2;Fam175a;Ncoa6;Macrod2;Rad51b;Trp73;Usp10;Brsk1;Aen;Smg1;Parpbp;Fancl;Nek4;Eya3;Pole;Rpa1;Smc6;Ap5z1;Ash2l;
GO:0019904	289	48	13.5263	3.54864	2.52646e-12	1.81835e-10	molecular_function:protein domain specific binding	Scn5a;Ica1;Tgm2;Dlgap2;Ogt;Mapt;Twist2;Rab27a;Cntrob;Sorbs2;Ist1;Insr;Cacnb2;Zbtb16;Myo7a;Ywhag;Npcd;Stambp;Ezr;Ppara;Dnmt1;Mpp7;Crk;Pias1;Ywhaz;Myo1d;Nfasc;Ctbp1;Cacna1c;Thra;Gria1;Scamp1;Itga3;Homer2;Gnas;Wnt5a;Nphs1;Zfp521;Ywhab;Rcc2;Runx2;Cabin1;Rara;Ppp1cc;Dlgap4;Rgs6;Tacc2;Iqgap1;
GO:0051015	124	31	5.80368	5.34144	2.60691e-12	1.8592e-10	molecular_function:actin filament binding	Mtss1;Ttn;Myo10;Syne2;Vcl;Pknox2;Shtn1;Myo1e;Myo18a;Capzb;Ppp1r9b;Cacnb2;Myo1d;Tnnc2;Tulp1;Myo7a;Antxr1;Tpm1;Syne1;Coro6;Actn4;Myo9b;Sipa1l1;Ctnna3;Arpc1b;Ezr;Bin1;Ctnna1;Ctnna2;Svil;Myo6;
GO:0007156	93	27	4.35276	6.20296	3.52029e-12	2.48799e-10	biological_process:homophilic cell adhesion via plasma membrane adhesion molecules	Ptprt;Cdh13;Fat3;Cdh23;Cadm1;Tenm3;Celsr3;Ptprf;Nectin4;Nectin2;Cdh22;Pcdhga4;Cdh15;Pcdh15;Celsr1;Pcdhgc3;Robo1;Pcdh10;Robo2;Kirrel3;Dscaml1;Sdk2;Chl1;Cdh4;Cdhr5;Fat2;Clstn3;
GO:0008201	144	33	6.73975	4.89632	4.03902e-12	2.82912e-10	molecular_function:heparin binding	Slit1;Col5a1;Col25a1;Slit3;Serpinc1;Fgfr1;Ptn;Nell2;Adgrg1;Serpind1;Ang;Tgfbr3;Ptch1;Mpo;Lamc2;Thbs3;Lrpap1;Abi3bp;Ltbp2;Adamtsl5;Nrp2;Ptprf;Rspo1;Fgfr4;Fgf12;Col5a3;Col23a1;Thbs4;Ncam1;Fgf9;Pcsk6;Col13a1;Aamp;
GO:0030335	191	38	8.93953	4.25078	4.29596e-12	2.98246e-10	biological_process:positive regulation of cell migration	Syne2;Ntrk3;Trim32;Sema4f;Tgfb2;Prkca;Wnt5b;Lrrc16a;Actn4;Mmp14;Sema5b;Has2;Pdgfd;Ptk2;Insr;Smad3;Lrrc15;Itgb3;Cdh13;Flt1;Igf1r;Elp3;Sema4g;Pik3cd;Diaph1;Sema7a;Atp8a1;Fer;Kit;Mylk;Pdgfra;Ptk2b;Ror2;Map2k1;Sema4d;Ikbkap;Hgf;Cpeb1;
GO:0005667	262	45	12.2626	3.66969	4.35641e-12	2.9979e-10	cellular_component:transcription factor complex	Tfeb;Taf4b;Sin3a;Ldb1;Rbl2;Twist2;Smad4;Hdac9;Hnf1b;Ascc2;Smad3;Ldb2;Rbl1;Nfatc2;Crebbp;Tfcp2;Naa15;Pknox1;Pbx3;Ascc3;Gfi1b;Glis2;Tead4;Smad2;Npas2;Dach1;Pax7;Trrap;Pbx1;Nfatc1;Ctbp1;Pax2;Pax5;Ncoa6;Dmbx1;Zeb1;Trp73;Elmsan1;Tbx2;Runx2;Figla;Nrf1;Zfhx3;Eya3;Arnt2;
GO:0005802	155	34	7.2546	4.68668	5.49588e-12	3.74914e-10	cellular_component:trans-Golgi network	Golga1;Tgfb2;Myo18a;Ap3b2;Bsn;Rab31;Amph;Sys1;Pacsin1;Arap1;Pacsin3;Atp8a2;Smpd4;Syt17;Ap1m1;Slc9a7;Arf1;March4;Scamp1;Fnbp1;Rab10;Lrrk2;Sorl1;Nbea;Gcnt1;Atp8a1;Tjap1;Atp7b;Ap4s1;Gbf1;Azin2;Atp9a;Rbfox1;Crhr1;
GO:0005739	1679	150	78.5836	1.90879	6.36889e-12	4.30724e-10	cellular_component:mitochondrion	Mcu;Mrps22;Bak1;Tomm20l;Aldh7a1;Akt1;Mrps9;Immp2l;Hadh;Lypla1;Nmnat3;Tmem65;Txnrd2;Ppp2r2b;Gbf1;Nln;Fam110b;Rnf185;Opa3;Acox2;Scp2;Tnfrsf26;Ndufaf2;Hk2;Gpam;Hlcs;Slc25a13;Lars2;Sardh;Map2k2;Aco2;Zfhx3;Ykt6;Glud1;Ripk1;Gars;Stard13;Spg7;Slit3;Cecr5;Fars2;Slc25a38;Fam73a;Ppp3ca;Gpx4;Timm9;Pold3;Fam72a;Mthfd1;Me1;Mrps18a;Acsf3;Acacb;Fyn;Fam162a;Thra;Grpel2;Slc25a21;Adck5;Ndufv3;Me3;Txnl1;Slc27a1;Map…
GO:0001701	288	47	13.4795	3.48678	7.22242e-12	4.84272e-10	biological_process:in utero embryonic development	Meg3;Gna12;Foxp1;Sin3a;Tpm1;Gli3;Smad4;Chd7;Tanc2;Runx1;Tgfbr3;Tab1;Plcg1;Zmiz1;Mkl2;Smad3;Kidins220;Ccm2;Ell;Pdgfra;Rbbp6;Sec24d;Apba2;Tead4;Smad2;Gatad2a;Tctn1;Mtss1;Myo1e;Gpi1;Fgfr1;Sox5;Mib1;Lrp1b;Pitpnb;Ccnk;Wnt7b;Ptch1;Gna13;Ttn;Esrrb;Rad51b;Gli2;Acvr1b;Smarca4;Arnt2;Rpa1;
GO:0005730	698	81	32.6691	2.47941	7.42162e-12	4.93412e-10	cellular_component:nucleolus	Wdr33;Bcas3;Taf4b;Srpk2;Edf1;Mxi1;Bop1;Blm;Dph6;Npm3;Mrps9;Mob2;Camk4;Top2a;C2cd4b;Zbtb16;Itpr1;Nol4;Usp28;Myo10;Eed;Cryl1;Pax2;Ip6k1;Dhx33;Smarcb1;Fancd2;Homer2;Rbm19;Smn1;Helq;Larp4b;Sp140;Aen;Itpr3;Zfhx3;Tbca;Smg6;Cptp;Exosc10;Oxr1;Tacc2;Pex14;Smarca4;Ikbkap;Trim41;Rae1;Nin;Rbl2;Nfatc3;Fam21;Cdca7l;Rreb1;Urb2;Tert;Dab1;Sun1;Tmx1;Elp3;Sp110;Setd7;Oasl1;Ezr;Mdm2;Bcl9l;Uso1;H2afy;Abtb1;Endov;Nuak…
GO:0031234	67	23	3.13586	7.33452	8.19228e-12	5.40071e-10	cellular_component:extrinsic component of cytoplasmic side of plasma membrane	Ryr2;Tyk2;Cyld;Kcnab2;Fer;Csk;Fes;Rgs8;Ptk2b;Blk;Esyt2;Matk;Farp1;Fyn;Ryr1;Abl2;Jak3;Iqgap1;Kcnab1;Txk;Ptk2;Dlg4;Racgap1;
GO:0010628	368	54	17.2238	3.13519	8.47676e-12	5.54168e-10	biological_process:positive regulation of gene expression	Ntrk3;Ogt;Srpk2;Wnt7a;Pias3;Rab27a;Ntrk2;Slc11a1;Tlr9;Hnf1b;Smad3;Mef2c;Cdk6;Musk;Ppp3ca;Ptpn22;Fgfr4;Ank3;Kit;Nfatc2;Crebbp;Cntn1;Ezr;Smad2;Mdm2;Park2;Dnmt1;Tgfb2;Drosha;Pde2a;Lif;Erbb2;Nfatc1;Wnt7b;Zc3h12a;Sgms1;Rbm4b;Bcl11a;Lims1;Gas6;Ppard;Cux2;Ahi1;Itgb3;Itga3;Pik3cd;Lmna;Runx2;Rara;Map2k1;Nr1h2;Acvr1b;Fgf9;Eda;
GO:0007169	99	27	4.63358	5.82703	1.18758e-11	7.69963e-10	biological_process:transmembrane receptor protein tyrosine kinase signaling pathway	Ahi1;Ptprt;Ntrk3;Flt1;Igf1r;Tyk2;Kit;Csk;Cspg4;Erbb2;Ephb2;Clnk;Pdgfra;Ntrk2;Blk;Ror2;Matk;Ror1;Epha6;Fyn;Epha2;Gdnf;Jak3;Txk;Insrr;Insr;Alk;
GO:0045121	240	42	11.2329	3.73901	1.28868e-11	8.28662e-10	cellular_component:membrane raft	Prkca;Grip1;Pde2a;Gpm6b;Rtn4rl1;Kcnn4;Erbb2;Adam1a;Rtn4rl2;Atp2b2;P2rx3;Sulf1;Fyn;Fas;Lrp2;Slc9a1;Slc6a2;Card11;Ephb1;Gnas;Kcnq1;Nphs1;Lrrk2;Tnr;Traf2;Itpr1;Atp2b1;Csk;Dlc1;Ngfr;Adcy2;Ptk2b;Itgb2;Cntn1;Anxa2;Ripk1;Slc2a1;Ezr;Faim2;Iqgap1;Park2;Tshr;
GO:0005911	193	37	9.03314	4.09603	2.07092e-11	1.32084e-09	cellular_component:cell-cell junction	Ptprj;Myo1e;Scrib;Lama1;Skap1;Nectin2;Pard3;Actn4;Mllt4;Pkp4;Pcdhgc3;Plcg1;Ptpru;Lims1;Akt1;Ahi1;Epb41l3;Cadm1;Vcl;Rab10;Nectin4;Vsir;Map2k2;Fgfr4;Kit;Mylk;Csk;Ngfr;Anxa2;Ptk7;Slc2a1;Ncam1;Pcdhga12;Ctnna1;Col13a1;Iqgap1;Pdzd2;
GO:0035023	71	23	3.32307	6.92131	2.15794e-11	1.36525e-09	biological_process:regulation of Rho protein signal transduction	Prex2;Sos1;Vav3;Arhgef40;Vav2;Fgd5;Ngef;Dlc1;Trio;Als2cl;Arhgef3;Prex1;Arhgef15;Myo9b;Abr;Itsn1;Farp1;Tiam2;Farp2;Arhgef10l;Kalrn;Fgd3;Mcf2l;
GO:0008021	119	29	5.56966	5.20678	2.1809e-11	1.36873e-09	cellular_component:synaptic vesicle	Kif3c;Scamp5;Atp6v0d1;Gria1;Scamp1;Cadm1;Syt2;Amph;Lrrk2;Dgki;Syngr1;Syt11;Brsk1;Syt1;Cadps2;Syt7;Rab3c;Sv2b;Slc6a17;Apba2;Disc1;Cttnbp2;Lgi3;Bin1;Rab3b;Kcnc4;Park2;Dlg4;Slc2a8;
GO:0006470	137	31	6.41213	4.83459	2.32216e-11	1.44582e-09	biological_process:protein dephosphorylation	Ptprj;Ptprs;Ptprg;Eya1;Ssh2;Ppp5c;Ptpn21;Ptpn13;Ptpn1;Ptprn2;Tab1;Cdc14a;Mtmr3;Ptpru;Ptprd;Ptp4a3;Ptprt;Ptprr;Phlpp1;Ptpro;Ptprf;Lhpp;Ppp3ca;Ptpn22;Ppp1cc;Nceh1;Eya3;Ppp1r12a;Ssh1;Dupd1;Ptpre;
GO:0008284	453	60	21.2021	2.8299	2.73347e-11	1.68851e-09	biological_process:positive regulation of cell proliferation	Ntrk3;Hdac4;Ptn;Srpk2;Crip2;Wnt7a;Ntrk2;Tgfbr3;Cdca7l;Ssbp3;Rab25;Csnk2a1;Insr;Glp1r;Fgfr4;Kit;Pdgfra;Crkl;Tet1;Tgfb2;Ccnd3;Fgfr1;Tfap2b;Lif;Pbx1;Nlgn2;Erbb2;Vwce;Hipk2;Wnt7b;Egf;Tns3;Pax2;Has2;Pdgfd;Ppard;Ptk2;Fgf17;Dpp4;Mta3;Rarb;Rad51b;Gnas;Wnt5a;Prdx3;Gli2;Il34;Fer;Tbx2;Runx2;Rara;Ptk2b;Fgf9;Smarca4;Rpa1;Arnt2;Gdnf;Hgf;Tshr;Ash2l;
GO:0043565	604	72	28.2695	2.54691	3.90361e-11	2.39249e-09	molecular_function:sequence-specific DNA binding	Snapc4;Foxp1;Zkscan1;Elf5;Edf1;Foxn3;Hnf1b;Zfp423;Zfp148;Top2a;Bach2;Tfcp2;Batf;Pbx3;Myog;Tead4;Pax7;Tfap2b;Safb;Nfatc1;Mta1;Bcl11a;Zeb1;Esrrb;Mta3;Pknox2;Gli2;Tbx2;Foxk1;Hnrnpab;Figla;Rara;Zfhx3;Prdm9;Bcl11b;Nr1h2;Dlx2;Nr2c2;Camta2;Hdac4;Hivep3;Nfatc3;Gli3;Smad4;Nr2c1;Csrnp3;Rreb1;Smad3;Mef2c;Camta1;Erg;Nfatc2;Ddit3;Pknox1;Nkx6-3;Ikzf4;Ppara;Elf1;Ppargc1a;Pbx1;Creb5;Ppard;Cux2;Thra;Foxp2;Dmbx1;R…
GO:0004714	53	20	2.4806	8.06256	4.61329e-11	2.80552e-09	molecular_function:transmembrane receptor protein tyrosine kinase activity	Pdgfra;Mst1r;Ntrk2;Ntrk3;Ror2;Flt1;Igf1r;Ptk7;Ror1;Fgfr1;Epha6;Musk;Epha2;Fgfr4;Insrr;Kit;Insr;Erbb2;Alk;Ephb2;
GO:0005089	68	22	3.18266	6.91245	5.93533e-11	3.58174e-09	molecular_function:Rho guanyl-nucleotide exchange factor activity	Prex2;Sos1;Vav3;Arhgef40;Vav2;Fgd5;Ngef;Trio;Als2cl;Arhgef3;Prex1;Arhgef15;Abr;Itsn1;Farp1;Tiam2;Dock9;Farp2;Arhgef10l;Kalrn;Fgd3;Mcf2l;
GO:0007264	222	39	10.3905	3.75345	6.04597e-11	3.62066e-09	biological_process:small GTPase mediated signal transduction	Rab22a;Rab7;Gna12;Sos1;Vav3;Rab31;Plce1;Rab44;Rab27a;Rhoj;Rapgef5;Rab3c;Gna13;Arl13a;Itsn1;Agap3;Dock9;Rasgef1b;Rab25;Rab40b;Rab3b;Ralgps1;Dab1;Arf1;Arhgap1;Agap1;Rapgef4;Rab6b;Rab10;Dock8;Vav2;Lrrk2;Lrrk1;Rab12;Arf3;Rap2a;Rheb;Dock3;Dock6;
GO:0030036	136	30	6.36532	4.71304	8.22203e-11	4.8865e-09	biological_process:actin cytoskeleton organization	Mtss1;Palld;Spire2;Capzb;Iqsec1;Ssh2;Coro6;Rhoj;Cdc42bpb;Abr;Elmo1;Flnb;Abl2;Nf1;Mkl2;Arhgap26;Grid2ip;Mob2;Mkl1;Nisch;Enah;Ppp1r9b;Diaph1;Inf2;Dlc1;Tesk2;Cttnbp2;Nrap;Ablim3;Ssh1;
GO:0016324	279	44	13.0583	3.36951	8.60185e-11	5.0738e-09	cellular_component:apical plasma membrane	Kcnk2;Amotl2;Stxbp3;Otoa;Muc4;Myrip;Rab27a;Slc22a13;Tlr9;Slc23a2;Trpm6;Slc39a4;Lrp2;Slc9a1;Fam65b;Gjb6;Ptpro;Myo7a;Atp2b1;Itpk1;Cacna1d;Trf;Slc2a1;Ezr;Atp6v0a4;Scnn1b;Atp6v0d1;Plec;Kcnn4;Cd9;Erbb2;Shank2;Atp2b2;Fas;Ptk2;Itgb3;Tnik;Muc3;Dpp4;Rapgef4;Cyp4a31;Slco2b1;Ano1;Cdhr5;
GO:0005929	237	40	11.0925	3.60604	1.00556e-10	5.88704e-09	cellular_component:cilium	Catsperd;Dync2h1;Arl2bp;Cdk20;Dzip1;Bbs9;Dnah7a;Aurka;Ttll5;Ift172;Gli3;Adrbk2;Catsperb;Dync2li1;Ttc8;Abcc4;Atp2b2;Ttc21b;Ift43;Ahi1;Tekt4;Dnah17;Pde1c;Dnah12;Rapgef4;Ick;Lrrc6;Ttll8;Mok;Gli2;Dnah8;Evc;Rp1l1;Catsper2;Cc2d2a;Wdr60;Wdpcp;Ccdc114;Spag4;Ttc21a;
GO:0004725	94	25	4.39956	5.68239	1.04957e-10	6.0992e-09	molecular_function:protein tyrosine phosphatase activity	Ptprj;Ptprt;Ptprr;Ptprs;Ptpro;Ptprg;Ptprf;Eya1;Pald1;Eya4;Ptpn22;Ssh2;Ptpn21;Ptpn13;Ptpn1;Ptprn2;Cdc14a;Eya3;Mtmr3;Ptpru;Ptprd;Ssh1;Dupd1;Ptpre;Ptp4a3;
GO:0030426	130	29	6.0845	4.76621	1.33312e-10	7.68993e-09	cellular_component:growth cone	Pcdhgb1;Dscam;Exoc4;Mapt;Erc2;Prex1;Ang;Shank2;Ntrk2;Klc1;Kif3c;Crmp1;Itga3;Rapgef4;Shtn1;Ppp1r9b;Crtac1;Ptprf;Lrrk2;Twf2;Stim1;Npcd;Ptk2b;Boc;Katnb1;Ncam1;Iqgap1;Pcdh9;Cpeb1;
GO:0043204	122	28	5.71007	4.90362	1.56467e-10	8.95973e-09	cellular_component:perikaryon	Smn1;Shtn1;Naip1;Mapk1;Grik3;Ctnnd2;Lrrk2;Bglap3;Rbfox3;Grik5;Kcnb1;Ppp5c;Neurl1a;Chrna10;Ngfr;Nell2;Pde10a;Ntrk2;Map2k1;Azin2;Brd1;Cacna1a;Crhbp;Camk2b;Naip5;Kcnab1;Grik4;Ass1;
GO:0003774	65	21	3.04225	6.90279	1.63441e-10	9.29127e-09	molecular_function:motor activity	Myo10;Dnah17;Dync2h1;Myo1h;Dnah12;Myh7b;Myo1e;Dync1i1;Myo18a;Myo1d;Myo3b;Myo7a;Dnah8;Myo16;Myo5b;Dync2li1;Myo9b;Myh11;Cgnl1;Myo9a;Myo6;
GO:0006629	452	58	21.1553	2.74162	2.22283e-10	1.25454e-08	biological_process:lipid metabolic process	Arv1;Rab7;Lpgat1;Hadhb;Bscl2;Mboat2;Osbpl10;Plcg1;Mtmr3;Mogat2;Hdlbp;Hadh;Lypla1;Far2;Dagla;Mbtps1;Pla2g4e;Sorl1;Plcg2;Sult4a1;Elovl7;Pnpla5;Nceh1;Plb1;Pltp;Ppara;Ptgs1;Abhd2;Acox2;Plch2;Plce1;Hadha;Far1;Plcb1;Serinc5;Gpam;Acsf3;Acacb;Acer1;Acsl6;Sgms1;Ddhd1;Ppard;Ptdss2;Acsbg1;Them4;Tbxas1;Abca17;Abhd3;Elovl6;Slc27a1;Pnliprp2;Enpp6;Gdpd5;Pnpla3;Fads6;Plcxd3;Pla2g6;
GO:0000978	335	48	15.6793	3.06136	2.3172e-10	1.29846e-08	molecular_function:RNA polymerase II proximal promoter sequence-specific DNA binding	Tfeb;Nacc2;Foxp1;Tbx20;Nfatc3;Chd4;Gli3;Smad4;Chd7;Nr2c1;Ebf1;Zfp148;Txk;Smad3;Mef2c;Tbx15;Nfatc2;Ddit3;Batf;Myog;Tead4;Smad2;Ppara;Elf1;Mesp2;Pbx1;Aebp2;Nfatc1;Pax2;Bcl11a;Nfic;Ncoa2;Smarcb1;Pax5;Cux2;Foxp2;Trp73;Ebf2;Gli2;Tbx2;Runx2;Figla;Nrf1;Bcl11b;Nr1h2;Smarca4;Arnt2;Zfp536;
GO:0003824	472	59	22.0914	2.67072	3.15409e-10	1.7534e-08	molecular_function:catalytic activity	Ogt;Hadhb;Hmgcll1;Pde10a;Tab1;Papss1;Neil1;Lgi3;Blm;Gmpr;Nt5c2;Camk1d;Fhit;Nmnat3;Elp3;Gtf2f1;Myo5b;Cdadc1;Exo1;Man2b2;Hoga1;Dcps;Mthfd1;Alkbh8;Phykpl;Gbe1;Dnmt1;Bcat2;Tkt;Capn3;Klhl3;Pde5a;Scp2;Alpl;Hadha;Hk2;Mthfr;Phkb;Acsf3;Acacb;Hlcs;Zc3h12a;Acsl6;Sulf1;Gstz1;Man2b1;Gadl1;Phlpp1;Gns;Acsbg1;Hyal3;Bckdhb;Apobec2;Slc27a1;Enpp6;Mocos;Azin2;Aldh1l1;Exosc10;
GO:0007010	100	25	4.68038	5.34144	3.17379e-10	1.7534e-08	biological_process:cytoskeleton organization	Lsp1;Epb41l3;Tnik;Pxn;Capzb;Sirpa;Nectin2;Tbccd1;Diaph1;Pacsin1;Ss18;Dlc1;Cap2;Blk;Padi6;Mical2;Sh3d19;Akt1;Cntnap1;Svil;Ablim3;Sipa1l3;Dst;Zak;Mical3;
GO:0007605	137	29	6.41213	4.52268	3.85823e-10	2.11663e-08	biological_process:sensory perception of sound	Col11a2;Cdh23;Asic2;Fgfr1;Otoa;Scn8a;Pcdh15;Chd7;Otof;Cntn5;Atp2b2;Nipbl;Kcnq4;Clic5;Dcdc2a;Fam65b;Myo6;Tmprss3;Homer2;Gjb6;Gabra5;Tecta;Eya4;Diaph1;Myo7a;Cacna1d;Dfna5;Tspear;Atp6v0a4;
GO:0043197	128	28	5.99089	4.67376	4.022e-10	2.19115e-08	cellular_component:dendritic spine	Asic2;Capzb;Tenm2;Dgki;Shank1;Neurl1a;Adrbk2;Shank2;Ntrk2;Lama2;P2rx3;Cnih2;Ncoa2;Synpo;Abl2;Baiap2;Dlg4;Grid2ip;Gria1;Ptpro;Rapgef4;Ppp1r9b;Syt11;Syne1;Myo5b;Asic1;Ppp1cc;Sipa1l1;
GO:0005262	85	23	3.97833	5.78133	4.30116e-10	2.32708e-08	molecular_function:calcium channel activity	Ryr2;Mcu;Cacnb2;Cacna2d3;Cacng2;Itpr1;Itpr3;Slc24a3;Itpr2;Cacna1d;Cacna1b;Cacna1a;Cacna2d4;Trpm6;Catsper2;Slc24a2;Ryr1;Cacna1c;Tpcn1;Cacng1;Cacna1s;Cacng4;Cacna2d2;
GO:0004721	138	29	6.45893	4.48991	4.46751e-10	2.40052e-08	molecular_function:phosphoprotein phosphatase activity	Ptprj;Ptprs;Ptprg;Eya1;Ssh2;Ppp5c;Ptpn21;Ptpn13;Ptpn1;Ptprn2;Cdc14a;Mtmr3;Ptpru;Ptprd;Ptp4a3;Ptprt;Ptprr;Phlpp1;Ptpro;Ctdspl;Ptprf;Eya4;Ppp3ca;Ptpn22;Eya3;Ppp1r12a;Ssh1;Dupd1;Ptpre;
GO:0005245	42	17	1.96576	8.64805	5.38888e-10	2.8759e-08	molecular_function:voltage-gated calcium channel activity	Cacna1d;Cacna1a;Cacna1b;Cacna2d4;Catsper2;Cacnb2;Cacna2d3;Ryr1;Cacna1c;Tpcn1;Cacng1;Cacna1s;Cacng2;Gas6;Cacng4;Cacna2d2;Ncs1;
GO:0006869	95	24	4.44637	5.39767	5.92353e-10	3.13987e-08	biological_process:lipid transport	Osbpl9;Ano9;Scp2;Abca15;Abca12;Abca3;Abca17;Sorl1;Osbpl6;Atp8a1;Gulp1;Osbpl10;Atp8a2;Atp11a;Slc27a1;Esyt2;Ano7;Cptp;Pitpnc1;Pltp;Ano4;Osbp2;Hdlbp;Osbpl2;
GO:0030018	105	25	4.9144	5.08709	7.55546e-10	3.97803e-08	cellular_component:Z disc	Ryr2;Ttn;Scn5a;Syne2;Vcl;Hdac4;Capn3;Capzb;Jph1;Atp2b4;Ppp3ca;Ank3;Scn8a;Actn4;Adrbk2;Fhl2;Cacna1d;Synm;Ppp1r12a;Ryr1;Cacna1c;Synpo;Bin1;Ank1;Sptan1;
GO:0030165	114	26	5.33564	4.87289	7.72719e-10	4.04132e-08	molecular_function:PDZ domain binding	Kidins220;Gria1;Cadm1;Exoc4;Sntb1;Musk;Atp2b4;Map2k2;Grik5;Erc2;Atp2b1;Sntg2;Erc1;Tgfbr3;Cacna1d;Atp2b2;Shisa9;Nkd1;Kirrel3;Ncoa2;Dlg2;Lrp2;Ushbp1;Park2;Baiap2;Dlg4;
GO:0007420	142	29	6.64614	4.36343	7.93294e-10	4.12145e-08	biological_process:brain development	Eml1;Aatk;Ak7;Fgfr1;Stxbp3;Ift172;Plcb1;Gli3;Adgrg1;Ptch1;Abr;Dclk1;Slc6a17;Nipbl;Fas;Unc5c;Nf1;Immp2l;Ncoa6;Dmbx1;Macrod2;Igf1r;Hydin;Diaph1;Col4a1;Dscaml1;Sepp1;Arnt2;Efna5;
GO:0042127	217	36	10.1564	3.54455	1.23901e-09	6.39475e-08	biological_process:regulation of cell proliferation	Dnmt1;Pias1;Tgfb2;Ccnd3;Tyk2;Fgfr1;Tnfrsf26;Wnt7a;Pbx1;Fes;Gli3;Smad4;Sgk3;B4galt1;Blk;Ptch1;Kcnh1;Fyn;Fas;Abl2;Txk;Ppard;Ptk2;Nf1;Cdk6;Lgr5;Chst11;Ppp1r9b;Tnfrsf8;Fer;Ptk2b;Matk;Fancl;Lama5;Ctnna1;Ptgs1;
GO:0005581	75	21	3.51029	5.98241	1.439e-09	7.37839e-08	cellular_component:collagen trimer	Col11a2;Col5a1;Col25a1;Wdr33;Col4a2;Col7a1;Fcna;Col26a1;Col6a3;Col23a1;Col19a1;C1qtnf7;Col4a1;Col15a1;Col6a1;Col6a2;Col13a1;Col24a1;Col6a6;Col27a1;Eda;
GO:0043065	310	44	14.5092	3.03256	1.60669e-09	8.18472e-08	biological_process:positive regulation of apoptotic process	Ntrk3;Tgm2;Aifm2;Scrib;Ptn;Bak1;Apbb2;Steap3;Csrnp3;Akt1;Muc2;Slc9a1;Unc5c;Stk3;Camk1d;Top2a;Ptprf;Sp110;Tnfrsf8;Zbtb16;Ddit3;Ngfr;Ncoa1;Ptpa;Map3k5;Fam72a;Eif2ak2;Tgfb2;Pde5a;Scp2;Neurl1a;B4galt1;Dab2ip;Fam162a;Atg7;Bin1;Fas;Nf1;Rarb;Trp73;Rnps1;Ripk1;Bmf;Zak;
GO:0007049	600	67	28.0823	2.38584	1.62169e-09	8.20785e-08	biological_process:cell cycle	Prkce;Klhl13;Bre;Zfyve26;Steap3;Nek6;Cdc14a;Foxn3;Ist1;Cdk6;Mad1l1;Papd5;Map9;Anxa11;Cdc23;Myog;Mcm2;Brsk2;Rab11fip3;Cdk20;Pard3;Cables2;Ccnk;Dab2ip;Nedd9;Smarcb1;Fancd2;Racgap1;Pdcd2l;Rcc2;Haus4;Rbm38;Suv39h2;Brinp2;Stard13;Zak;Mapk1;Rbl2;Tex14;Rad21;Cntrob;Cdk14;Anapc5;Erh;Ttc28;Crocc;Rab11fip4;Mau2;Rbl1;Ddit3;Mapk13;Katnb1;Tlk2;Ccnd3;Aurka;Incenp;Nipbl;Pard3b;Fanci;Hjurp;Trp73;Brsk1;Psme3;Mcm6…
GO:0005891	22	13	1.02968	12.6252	1.70049e-09	8.55152e-08	cellular_component:voltage-gated calcium channel complex	Cacna2d3;Cacna1c;Cacng1;Cacng2;Cacna1s;Cacna1d;Cacng4;Cacna2d2;Cacna1a;Cacna1b;Cacna2d4;Pde4d;Cacnb2;
GO:0016491	588	66	27.5207	2.3982	1.8977e-09	9.48244e-08	molecular_function:oxidoreductase activity	Sdr42e1;Cyp2w1;Aldh7a1;Tet3;Steap3;Txnrd1;Mpo;Cyp2d11;Tph1;Hadh;Txnrd2;Smox;Ptgs1;Mical3;Tet1;Ctbp2;Acox2;Hadha;Cryl1;Rdh11;Cyb561a3;Tbxas1;Bckdhb;Prdx3;Sardh;Glud1;Fads6;Kdm2b;Oxr1;Dhrs3;Rfesd;Aifm2;Vat1l;Gfod1;Noxred1;Mical2;Enox1;Aoc2;Gmpr;Kcnab1;Far2;Msra;Ndor1;Gpx4;Fto;Aldh9a1;Mthfd1;Alkbh8;Me1;Acad10;Nxn;Pyroxd2;Kcnab2;Far1;Foxred2;Mthfr;Ctbp1;Dcxr;Wwox;Cryzl1;Me3;Kdm4b;Ethe1;Aldh1l1;Vkorc1…
GO:0048812	61	19	2.85503	6.65491	1.97024e-09	9.78261e-08	biological_process:neuron projection morphogenesis	Epb41l3;Brsk2;Slit1;Nyap2;Wnt7b;Map2k1;Zswim6;Shtn1;Dab2ip;Wnt5a;Thbs4;Plxna4;Kirrel3;Lrrk2;Cntnap1;Srgap2;Pacsin1;Brsk1;Myo16;
GO:0001934	179	32	8.37789	3.81958	2.0047e-09	9.81772e-08	biological_process:positive regulation of protein phosphorylation	Fam129a;Ccnd3;Prkca;Ogt;Card14;Erbb2;Hipk2;Adrbk2;Mprip;Akt1;Gas6;Ptk2;Cd6;Insr;Tnik;Mob2;Cdon;Gnas;Wnt5a;Eif4g3;Musk;Lrrk2;Rspo1;Sema7a;Il34;Anxa2;Ripk1;Rap2a;Map3k5;Pla2g6;Sema4d;Raf1;
GO:0098609	179	32	8.37789	3.81958	2.0047e-09	9.81772e-08	biological_process:cell-cell adhesion	Mpp7;Uso1;Snd1;Gigyf2;Larp1;Ywhaz;Scrib;Capzb;Plec;Ppfibp1;Pi4ka;Esyt2;Mprip;Dock9;Flnb;Ctnna2;Hdlbp;Mkl2;Myo6;Arhgap1;Unc5d;Rab10;Epb41l1;Mark2;Twf2;Ywhab;Crebbp;Erc1;Ykt6;Mre11a;Ppl;Eif4h;
GO:0008022	200	34	9.36077	3.63218	2.01485e-09	9.81772e-08	molecular_function:protein C-terminus binding	Pias1;Tnni3k;Grip1;Amph;Clic6;Pias3;Shank1;Erbb2;Shank2;Ksr1;Vta1;Nipbl;Neil1;Dlg2;Adcy8;Sntg1;Dlg4;Sdc1;Kcnk3;Top2a;Eml2;Ppp1r9b;Prdx3;Zbtb16;Itpr1;Ywhab;Syt1;Ppp1cc;Map2k1;Cacna1b;Sclt1;Mre11a;Rbfox1;Atxn1;
GO:0001525	224	36	10.4841	3.43378	2.61172e-09	1.2583e-07	biological_process:angiogenesis	Arhgap22;Prkca;Gpi1;Vav3;Bcas3;Fgfr1;Srpk2;Wnt7a;Cspg4;Pik3r6;Ephb2;Adgrg1;Ang;Wnt7b;Zc3h12a;Wars;Gna13;Egf;Dab2ip;Ramp1;Epha2;Ptk2;Ackr3;Ephb1;Flt1;Nrp2;Col4a2;Vav2;Naa15;Ptk2b;Arhgap24;Pknox1;Anxa2;Col4a1;Fgf9;Rora;
GO:0090630	70	20	3.27627	6.1045	2.61444e-09	1.2583e-07	biological_process:activation of GTPase activity	Ntrk3;Grtp1;Scrib;Wnt5a;Bcas3;Rabgap1l;Usp6nl;Adprhl1;Tbc1d9;Rcc2;Ptk2b;Tbc1d1;Arhgap24;Sipa1l1;Tbc1d22a;Epha2;Tbc1d16;Tbc1d9b;Tbc1d2b;Evi5l;
GO:0001764	122	26	5.71007	4.55336	2.66011e-09	1.27247e-07	biological_process:neuron migration	Ntrk3;Fat3;Mkl1;Itga3;Nrp2;Celsr3;Elp3;Mark2;Tbx20;Mapt;Spock1;Apbb2;Celsr1;Ntrk2;Dclk1;Disc1;Fyn;Kirrel3;Gas6;Chl1;Sema6a;Ptk2;Dcdc2a;Mkl2;Dab1;Mef2c;
GO:0018105	132	27	6.17811	4.37027	2.8806e-09	1.36134e-07	biological_process:peptidyl-serine phosphorylation	Prkce;Brsk2;Mast4;Sbk1;Camk2a;Prkca;Mapk1;Myo3b;Mknk1;Hipk2;Sgk3;Dclk1;Nek6;Camk2b;Akt1;Ulk1;Gas6;Map4k1;Camk4;Lrrk2;Brsk1;Tbk1;Dyrk1a;Lmtk2;Smg1;Mapk13;Tlk2;
GO:0031175	132	27	6.17811	4.37027	2.8806e-09	1.36134e-07	biological_process:neuron projection development	Lingo1;Palld;Lama1;Cntnap2;Capzb;Fgfr1;Atp8a2;Ccdc64;Wnt7b;Atg7;Ulk1;Cntnap1;Mkl2;Bloc1s1;Mkl1;Igf1r;Clmn;Efhd1;Fry;Diaph1;Sema7a;Ptk2b;Gdpd5;Cntn1;Ncam1;Gdnf;Chl1;
GO:0030496	105	24	4.9144	4.8836	3.25969e-09	1.53127e-07	cellular_component:midbody	Rab11fip4;Klhl13;Rab11fip3;Arl2bp;Cyld;Zfyve26;Syne1;Tex14;Rcc2;Pkp4;Ptpn13;Anxa11;Aurkc;Incenp;Mtcl1;Ptch1;Katnb1;Anxa2;Slc2a1;Iqgap1;Erh;Ttc28;Ist1;Racgap1;
GO:0031012	283	41	13.2455	3.09539	3.30806e-09	1.54475e-07	cellular_component:extracellular matrix	Tgm2;Col26a1;Col6a3;Mmp14;Tomm20;Spon1;Thsd4;Adamts18;Ltbp4;Tinagl1;Col4a2;Col5a3;Vcan;Thbs4;Nid2;Eftud2;Lama5;Col6a2;Fbln2;Zp3;Fbn2;Adamts20;Col5a1;Tgfb2;Lama1;Adamts2;Plec;Hadha;Papln;Flnb;Col6a1;Adamts12;Ltbp2;Ssc5d;Fbn1;Lmna;Vwf;Col4a1;Col15a1;Pcsk6;Cd93;
GO:0016757	205	34	9.59479	3.54359	3.502e-09	1.62563e-07	molecular_function:transferase activity, transferring glycosyl groups	Alg1;Tnks2;Ogt;Mgat5;Galnt14;Mgat3;Glt1d1;B4galt1;Ugt1a6a;Colgalt1;Has2;Galnt18;Ugt1a1;Ugt1a2;Mfng;Galnt15;St3gal3;Alg8;Pigz;Gcnt1;Gbgt1;Gxylt2;Ugt1a7c;Mgat4a;Galnt6;Ugt1a9;Galnt2;Extl3;St6galnac3;Wbscr17;Fut7;Xxylt1;Galnt5;Gbe1;
GO:0005604	97	23	4.53997	5.06611	3.7659e-09	1.73785e-07	cellular_component:basement membrane	Col5a1;Smoc1;Tgfb2;Hmcn2;Lama1;Col4a2;Col7a1;Fbn1;Ptn;Runx1;Papln;Lama2;Lamc2;Trf;Anxa2;Thbs4;Nid2;Col4a1;Fgf9;Col15a1;Lama5;Lama4;Efna5;
GO:0043547	134	27	6.27171	4.30504	3.81335e-09	1.74946e-07	biological_process:positive regulation of GTPase activity	Dennd2c;Bcas3;Iqsec1;Dennd1a;Arap1;Rgs8;Erbb2;Mllt4;Pkp4;Prex1;Myo9b;Lims1;Rasgef1b;Bin1;Srgap2;Arhgap23;Nf1;Rapgef4;Wnt5a;Ric1;Map2k1;Rgs6;Gnao1;Kalrn;Sema4d;Tbcd;Myo9a;
GO:0006812	72	20	3.36988	5.93494	3.92584e-09	1.7906e-07	biological_process:cation transport	Slc9a9;Slc9a8;Asic2;Slc30a2;Stim1;Trpm3;Ano1;Asic1;Atp7b;Piezo2;Slc24a3;Piezo1;P2rx3;Trpm6;Slc9a7;Tmem63c;Slc30a10;Slc9a1;Slc30a7;Trpm5;
GO:0060076	36	15	1.68494	8.9024	4.0271e-09	1.82616e-07	cellular_component:excitatory synapse	Ntrk2;Gria1;Itga3;Ntm;Rapgef4;Ptprf;Bsn;Elfn1;Nlgn3;Dgki;Syt11;Shank1;Syt1;Nlgn2;Dlg4;
GO:0055114	654	70	30.6097	2.28686	4.19915e-09	1.89324e-07	biological_process:oxidation-reduction process	Sdr42e1;Cyp2w1;Aldh7a1;Tet3;Steap3;Txnrd1;Mpo;Cyp2d11;Tph1;Hadh;Txnrd2;Smox;Sh3pxd2a;Ptgs1;Mical3;Tet1;Ctbp2;Acox2;Hadha;Cryl1;Rdh11;Cyb561a3;Tbxas1;Bckdhb;Prdx3;Sardh;Glud1;Fads6;Kdm2b;Dhrs3;Rfesd;Aifm2;Vat1l;Gfod1;Noxred1;Mical2;Enox1;Aoc2;Gmpr;Kcnab1;Far2;Tmx1;Msra;Ndor1;Gpx4;Fto;Aldh9a1;Mthfd1;Alkbh8;Me1;Acad10;Nxn;Pyroxd2;Kcnab2;Far1;Foxred2;Mthfr;Cyb5a;Ctbp1;Dcxr;Wwox;Cryzl1;Ndufv3;Me3;Kdm4…
GO:0007417	81	21	3.79111	5.53927	4.59924e-09	2.06177e-07	biological_process:central nervous system development	Dmbx1;Zeb1;Elp3;Zeb2;Zbtb16;Csk;Ngfr;Gli3;Chd7;Runx1;Celsr1;Ang;Casz1;Ncan;Vcan;Szt2;Pax2;Dscaml1;Arnt2;Dab1;Stk3;
GO:0006813	126	26	5.89728	4.40881	4.76622e-09	2.12263e-07	biological_process:potassium ion transport	Kcnk2;Slc9a8;Kcnt1;Kcnk3;Kcnq5;Kcnip4;Kcnq1;Kcnab2;Kcnmb2;Kcnn4;Kcnb1;Kcnj1;Kcnq2;Slc24a3;Slc12a8;Kcnh1;Kcnk13;Kcnq4;Kcnh5;Slc9a7;Slc12a7;Kcnj6;Kcnab1;Kcnmb3;Kcnc4;Atp4b;
GO:0008076	73	20	3.41668	5.85364	4.78911e-09	2.12263e-07	cellular_component:voltage-gated potassium channel complex	Kcnk2;Kcnt1;Cntnap2;Kcnq5;Kcnip4;Kcnq1;Kcnab2;Kcnmb2;Kcnb1;Kcnq2;Kcnh1;Kcnq4;Dlg2;Cntnap1;Kcnab1;Kcnmb3;Kcnc4;Dpp10;Dlg4;Dpp6;
GO:0050808	37	15	1.73174	8.6618	5.42305e-09	2.3901e-07	biological_process:synapse organization	Pcdhgc5;Pcdhgc3;Wnt7b;Pcdhgc4;Nfasc;Atp2b2;Lrrtm4;Ctnnd2;Elfn1;Tnr;Nlgn3;Sncg;Wnt7a;Ank3;Nlgn2;
GO:0031625	278	40	13.0115	3.07421	6.02739e-09	2.64161e-07	molecular_function:ubiquitin protein ligase binding	Scn5a;Btbd11;Nkd2;H13;Smg5;Asb14;Smad3;Btbd9;Mfn2;Fhit;Ptpn22;Ngfr;Sipa1l1;Sncaip;Per3;Smad2;Mdm2;Park2;Cbs;Pias1;Mid1;Ube2v1;Ywhaz;Fam178a;Gpi1;Ppargc1a;Aurka;Abtb1;Erbb2;Vcl;Prkar1a;Syt11;Traf2;Casc3;Fancl;Ripk1;Asb18;Gm4858;Smc6;Abtb2;
GO:0042383	109	24	5.10162	4.70439	6.12798e-09	2.67078e-07	cellular_component:sarcolemma	Ryr2;Scn5a;Vcl;Gnas;Plec;Kcnq1;Sgcz;Atp2b4;Ank3;Col6a3;Sgcd;Lama2;Cacna1d;Synm;Anxa2;Ryr1;Cacna1c;Col6a1;Fas;Cacna1s;Col6a2;Slc9a1;Ptk2;Ank1;
GO:0045087	382	49	17.8791	2.74064	6.21262e-09	2.69271e-07	biological_process:innate immune response	Tyk2;Polr3g;Ang;C1s2;Ifna12;Tlr9;Cd244;Txk;Trim8;Padi4;Tlr5;Sp110;Gm13275;Tbk1;Mst1r;Oasl1;Map3k5;C1s1;Eif2ak2;Nrros;Trim32;Masp1;Trim27;Fcna;Fes;Serinc5;Trim14;Blk;Irf7;C1rb;Dab2ip;Fyn;Polr3e;Naip5;Abl2;Nlrc5;Ptk2;Defb25;Ssc5d;Pik3cd;Il34;Fer;Csk;Ptk2b;Matk;Polr3b;Jak3;Nlrp1a;Cd84;
GO:0008283	211	34	9.87561	3.44283	6.64631e-09	2.86485e-07	biological_process:cell proliferation	Cd74;Larp1;Dach1;Scrib;Polr3g;Tbx20;Bak1;Cspg4;Smad4;Hlcs;Txnrd1;Bop1;Lrp2;Dazap1;Ppard;Srrt;Map4k1;Oca2;Prkar1b;Prkar1a;Gli2;Fer;Crebbp;Usp28;Sbds;Pdxk;Map2k1;Mov10l1;Mre11a;Ascc3;Tacc2;Gdnf;Hgf;Ncf1;
GO:0008017	190	32	8.89273	3.59844	7.1325e-09	3.05762e-07	molecular_function:microtubule binding	Klc3;Mid1;Fmn1;Eml1;Kif18a;Ccser2;Mapt;Ppp5c;Fes;Chd4;Nf1;Jakmip1;Dst;Racgap1;Kif3c;Mtus2;Jakmip3;Dync1i1;Eml2;Kifc3;Rcc2;Dpysl5;Sbds;Mtcl1;Katnb1;Map6;Gas2l2;Kif9;Ezr;Pex14;Kif26b;Reep1;
GO:0008233	502	58	23.4955	2.46855	7.54064e-09	3.21502e-07	molecular_function:peptidase activity	Tll1;Tmprss2;Agtpbp1;Spg7;Casp7;Cpz;Mmp14;Dnpep;Capn8;C1s2;H13;Thsd4;Adamts18;Immp2l;Tmprss3;Agbl4;Mbtps1;Ace2;Usp28;Psma8;Stambp;Klk1b21;Ece1;Nln;C1s1;Dpp3;Adamts20;Masp1;Dpep2;Capn3;Usp4;Adamts2;Agbl1;Usp38;Cyld;Mep1b;Adam1a;Prss28;Papln;Zc3h12a;Prss50;C1rb;Cpq;Capn15;Adamts12;Lvrn;Ggt1;Amz1;Dpp4;Usp34;Corin;Usp10;Tmprss5;Mep1a;Capn9;Aph1c;Josd2;Bmp1;
GO:0006508	573	63	26.8186	2.34912	7.91351e-09	3.35576e-07	biological_process:proteolysis	Tmprss2;Casp7;Cpz;Dnpep;Capn8;C1s2;Adamts18;Immp2l;Adam22;Tmprss3;Agbl4;Ace2;Usp28;Klk1b21;Nln;C1s1;Dpp6;Adamts20;Masp1;Dpep2;Agbl1;Usp38;Cyld;Adam1a;Adgb;Prss28;Prss50;Lvrn;Adamts12;Ggt1;Amz1;Usp34;Usp10;Tmprss5;Mep1a;Prss36;Capn9;Josd2;Bmp1;Hgf;Dpp10;Tll1;Agtpbp1;Spg7;Mmp14;H13;Proz;Tinagl1;Mbtps1;Psma8;Stambp;Ece1;Dpp3;Capn3;Usp4;Adamts2;Mep1b;Zc3h12a;C1rb;Cpq;Capn15;Dpp4;Corin;
GO:0000287	182	31	8.5183	3.63923	9.60265e-09	4.05015e-07	molecular_function:magnesium ion binding	Tkt;Tssk2;Brsk2;Mast4;Srpk2;Adprhl1;Gclc;Atp8a2;Atp11a;Endov;Ppa2;Nek6;Fars2;Gss;Abl2;Arf1;Stk3;Top2a;Ick;Mark2;Brsk1;Atp8a1;Itpk1;Adcy2;Rps6ka5;Pdxk;Map3k5;Oxsr1;Atp9a;Ncs1;Zak;
GO:0015630	151	28	7.06738	3.96186	9.7592e-09	4.09417e-07	cellular_component:microtubule cytoskeleton	Mid1;Fmn1;Kif18a;Mapk1;Ccser2;Aurka;Mapt;Fes;Nuak1;Akt1;Jakmip1;Ift43;Dst;Mfn2;Pknox2;Shtn1;Ofcc1;Ttll8;Fer;Map9;Tbca;Katnb1;Tacc2;Iqgap1;Alkbh8;Mcm2;Aamp;Sptan1;
GO:0016311	103	23	4.8208	4.771	9.98374e-09	4.16609e-07	biological_process:dephosphorylation	Ptprj;Ptprt;Ptprr;Ptprs;Ptpro;Ptprg;Ptprf;Alpl;Ppp3ca;Ptpn22;Ssh2;Ptpn21;Ptpn13;Ptpn1;Ptprn2;Cdc14a;Mtmr3;Ptpru;Ptprd;Ssh1;Dupd1;Ptpre;Ptp4a3;
GO:0002376	380	48	17.7855	2.69883	1.14228e-08	4.74138e-07	biological_process:immune system process	Prkce;Tfeb;Cd74;Polr3g;Chia1;C1s2;Ctps;Tlr9;Dclre1c;Cd244;Txk;Padi4;Camk4;Tlr5;Sp110;Cd300a;Ptpn22;Tbk1;Mst1r;Oasl1;Exo1;Map3k5;C1s1;Eif2ak2;Nrros;Masp1;Skap1;Fcna;Kcnn4;Serinc5;Irf7;Zc3h12a;C1rb;Dab2ip;Fyn;Polr3e;Naip5;Nlrc5;Cadm1;Ssc5d;Pik3cd;Il34;Csk;Ptk2b;Mcm3ap;Polr3b;Jak3;Cd84;
GO:0008766	240	36	11.2329	3.20486	1.28641e-08	5.12278e-07	molecular_function:UDP-N-acetylmuramoylalanyl-D-glutamyl-2,6-diaminopimelate-D-alanyl-D-alanine ligase activity	Pias1;Trim32;Mid1;Rnf185;Trim41;March2;Lrsam1;Trim27;Mib1;Pias3;Neurl1a;Rnf180;Dtx2;Mgrn1;Trim8;March4;Wwp2;Sh3rf1;Rnf43;Ttll8;Kcmf1;Traf2;Atg10;Rnf130;Rnf149;Ube2cbp;Sh3rf2;Rbbp6;Fancl;Rnf220;Pdzrn3;Arih2;Mdm2;Trim71;Park2;Hace1;
GO:0018169	240	36	11.2329	3.20486	1.28641e-08	5.12278e-07	molecular_function:ribosomal S6-glutamic acid ligase activity	Pias1;Trim32;Mid1;Rnf185;Trim41;March2;Lrsam1;Trim27;Mib1;Pias3;Neurl1a;Rnf180;Dtx2;Mgrn1;Trim8;March4;Wwp2;Sh3rf1;Rnf43;Ttll8;Kcmf1;Traf2;Atg10;Rnf130;Rnf149;Ube2cbp;Sh3rf2;Rbbp6;Fancl;Rnf220;Pdzrn3;Arih2;Mdm2;Trim71;Park2;Hace1;
GO:0043773	240	36	11.2329	3.20486	1.28641e-08	5.12278e-07	molecular_function:coenzyme F420-0 gamma-glutamyl ligase activity	Pias1;Trim32;Mid1;Rnf185;Trim41;March2;Lrsam1;Trim27;Mib1;Pias3;Neurl1a;Rnf180;Dtx2;Mgrn1;Trim8;March4;Wwp2;Sh3rf1;Rnf43;Ttll8;Kcmf1;Traf2;Atg10;Rnf130;Rnf149;Ube2cbp;Sh3rf2;Rbbp6;Fancl;Rnf220;Pdzrn3;Arih2;Mdm2;Trim71;Park2;Hace1;
GO:0043774	240	36	11.2329	3.20486	1.28641e-08	5.12278e-07	molecular_function:coenzyme F420-2 alpha-glutamyl ligase activity	Pias1;Trim32;Mid1;Rnf185;Trim41;March2;Lrsam1;Trim27;Mib1;Pias3;Neurl1a;Rnf180;Dtx2;Mgrn1;Trim8;March4;Wwp2;Sh3rf1;Rnf43;Ttll8;Kcmf1;Traf2;Atg10;Rnf130;Rnf149;Ube2cbp;Sh3rf2;Rbbp6;Fancl;Rnf220;Pdzrn3;Arih2;Mdm2;Trim71;Park2;Hace1;
GO:0070735	240	36	11.2329	3.20486	1.28641e-08	5.12278e-07	molecular_function:protein-glycine ligase activity	Pias1;Trim32;Mid1;Rnf185;Trim41;March2;Lrsam1;Trim27;Mib1;Pias3;Neurl1a;Rnf180;Dtx2;Mgrn1;Trim8;March4;Wwp2;Sh3rf1;Rnf43;Ttll8;Kcmf1;Traf2;Atg10;Rnf130;Rnf149;Ube2cbp;Sh3rf2;Rbbp6;Fancl;Rnf220;Pdzrn3;Arih2;Mdm2;Trim71;Park2;Hace1;
GO:0070736	240	36	11.2329	3.20486	1.28641e-08	5.12278e-07	molecular_function:protein-glycine ligase activity, initiating	Pias1;Trim32;Mid1;Rnf185;Trim41;March2;Lrsam1;Trim27;Mib1;Pias3;Neurl1a;Rnf180;Dtx2;Mgrn1;Trim8;March4;Wwp2;Sh3rf1;Rnf43;Ttll8;Kcmf1;Traf2;Atg10;Rnf130;Rnf149;Ube2cbp;Sh3rf2;Rbbp6;Fancl;Rnf220;Pdzrn3;Arih2;Mdm2;Trim71;Park2;Hace1;
GO:0070737	240	36	11.2329	3.20486	1.28641e-08	5.12278e-07	molecular_function:protein-glycine ligase activity, elongating	Pias1;Trim32;Mid1;Rnf185;Trim41;March2;Lrsam1;Trim27;Mib1;Pias3;Neurl1a;Rnf180;Dtx2;Mgrn1;Trim8;March4;Wwp2;Sh3rf1;Rnf43;Ttll8;Kcmf1;Traf2;Atg10;Rnf130;Rnf149;Ube2cbp;Sh3rf2;Rbbp6;Fancl;Rnf220;Pdzrn3;Arih2;Mdm2;Trim71;Park2;Hace1;
GO:0070738	240	36	11.2329	3.20486	1.28641e-08	5.12278e-07	molecular_function:tubulin-glycine ligase activity	Pias1;Trim32;Mid1;Rnf185;Trim41;March2;Lrsam1;Trim27;Mib1;Pias3;Neurl1a;Rnf180;Dtx2;Mgrn1;Trim8;March4;Wwp2;Sh3rf1;Rnf43;Ttll8;Kcmf1;Traf2;Atg10;Rnf130;Rnf149;Ube2cbp;Sh3rf2;Rbbp6;Fancl;Rnf220;Pdzrn3;Arih2;Mdm2;Trim71;Park2;Hace1;
GO:0045177	114	24	5.33564	4.49806	1.30041e-08	5.15238e-07	cellular_component:apical part of cell	Dync2h1;Cdh23;Homer2;Prkca;Nin;Pard3;Atp2b1;Mllt4;Itpr3;Atp7b;Otof;Dync2li1;Ezr;Clcn5;Lrp2;Chl1;Atp6v1c1;Pdzd2;Sipa1l3;Atp6v0a4;Dab1;Crhr1;Myo6;Eda;
GO:0047485	115	24	5.38244	4.45894	1.50461e-08	5.9315e-07	molecular_function:protein N-terminus binding	Cdh23;Mau2;Tgfb2;Exoc4;Plec;Myo7a;Tpm1;Pias3;Kcnb1;Actn4;Pcdh15;Kcnq2;Ppp1cc;Map2k1;Dab2ip;Nipbl;Ncoa1;Vwf;Pex14;Smarca4;Gtf2h2;Csnk2a1;Adcy8;Sptan1;
GO:0070739	242	36	11.3265	3.17838	1.55442e-08	6.06689e-07	molecular_function:protein-glutamic acid ligase activity	Pias1;Trim32;Mid1;Rnf185;Trim41;March2;Lrsam1;Trim27;Mib1;Pias3;Neurl1a;Rnf180;Dtx2;Mgrn1;Trim8;March4;Wwp2;Sh3rf1;Rnf43;Ttll8;Kcmf1;Traf2;Atg10;Rnf130;Rnf149;Ube2cbp;Sh3rf2;Rbbp6;Fancl;Rnf220;Pdzrn3;Arih2;Mdm2;Trim71;Park2;Hace1;
GO:0070740	242	36	11.3265	3.17838	1.55442e-08	6.06689e-07	molecular_function:tubulin-glutamic acid ligase activity	Pias1;Trim32;Mid1;Rnf185;Trim41;March2;Lrsam1;Trim27;Mib1;Pias3;Neurl1a;Rnf180;Dtx2;Mgrn1;Trim8;March4;Wwp2;Sh3rf1;Rnf43;Ttll8;Kcmf1;Traf2;Atg10;Rnf130;Rnf149;Ube2cbp;Sh3rf2;Rbbp6;Fancl;Rnf220;Pdzrn3;Arih2;Mdm2;Trim71;Park2;Hace1;
GO:0016459	48	16	2.24658	7.12192	1.64486e-08	6.3764e-07	cellular_component:myosin complex	Myo10;Myo9b;Myo1h;Myh11;Myh7b;Myo1e;Myo18a;Myo1d;Myo3b;Cgnl1;Bmf;Myo7a;Myo16;Myo9a;Myo5b;Myo6;
GO:0005912	41	15	1.91896	7.81675	1.65811e-08	6.3764e-07	cellular_component:adherens junction	Mpp7;Ahi1;Mtss1;Vcl;Ctnna3;Synm;Myo1e;Nectin4;Tbcd;Ctnna1;Ctnna2;Pard3;Magi1;Efna5;Mllt4;
GO:0038083	41	15	1.91896	7.81675	1.65811e-08	6.3764e-07	biological_process:peptidyl-tyrosine autophosphorylation	Ptk2b;Blk;Matk;Aatk;Igf1r;Tyk2;Fyn;Abl2;Jak3;Txk;Ptk2;Fer;Csk;Insr;Fes;
GO:0016791	116	24	5.42924	4.4205	1.7383e-08	6.65217e-07	molecular_function:phosphatase activity	Ptprj;Ptprt;Ptprr;Ptprs;Ptpro;Ctdspl;Ptprg;Ptprf;Alpl;Ptpn22;Ssh2;Ptpn21;Ppp1cc;Ptpn13;Ptpn1;Ptprn2;Cdc14a;Mtmr3;Ptpru;Ptprd;Ssh1;Dupd1;Ptpre;Ptp4a3;
GO:0006886	221	34	10.3436	3.28704	1.83645e-08	6.99367e-07	biological_process:intracellular protein transport	Uso1;Rab7;Grtp1;Cd74;Vps26a;Ap3b2;Rabgap1l;Ap2a2;Adprhl1;Tbc1d9;Tomm20l;Myrip;Adrbk2;Tbc1d1;Tomm20;Tom1l2;Ramp1;Ap1m1;Klc1;Tbc1d9b;Tbc1d2b;Sec24a;Rab10;Copz1;Usp6nl;Myo7a;Ngfr;Ap4s1;Tbc1d22a;Copg2;Tbc1d16;Zp3;Stam2;Evi5l;
GO:0004872	167	29	7.81624	3.71022	1.93542e-08	7.33495e-07	molecular_function:signaling receptor activity	Nectin2;Rtn4rl1;Nlgn2;Ephb2;Rtn4rl2;Itgb6;Ramp1;Cd244;Lrp2;Notch3;Grik4;Itgb3;Gria1;Cadm1;Grik3;Tlr5;Xpr1;Nectin4;Nlgn3;Glp1r;Grid1;Itgb5;Antxr1;Grik5;Itgb2;Extl3;Antxrl;Sema4d;Ppara;
GO:0005575	6628	423	310.216	1.36357	2.056e-08	7.75449e-07	cellular_component:cellular_component	Wdr63;Mettl13;1700001L05Rik;4930467E23Rik;St5;Acp7;Ldlrad1;Pitpnm3;1700024B05Rik;BC030867;9530057J20Rik;Ppp1r37;Nt5dc1;Tmcc1;Xxylt1;A230087F16Rik;Hs3st2;Gm5065;Ankrd49;Vmn2r2;Slc45a1;Ttc22;Fam173b;Gm9125;Tmem255b;Spocd1;Mab21l3;G430095P16Rik;Luzp2;Fam222a;Ppp4r1;Gm9222;Lrriq3;Tanc2;Morn1;4933416M07Rik;Atrnl1;Eif4g3;Heatr3;Igf1os;Dytn;Hmgxb3;Zfp236;Dupd1;Iffo2;Hspa12b;Arl14epl;Pard3b;Samd3;Gm3404;…
GO:0030027	137	26	6.41213	4.05482	2.12854e-08	7.98968e-07	cellular_component:lamellipodium	Myo10;Pxn;Dgkz;Capzb;Lrrc16a;Ptpn13;Myo9b;Itsn1;Plcg1;Abl2;Ctnna2;Srgap2;Ptk2;Dpp4;Enah;Shtn1;Ppp1r9b;Twf2;Fer;Mylk;Ptk2b;Evl;Ctnna3;Ctnna1;Mcf2l;Ablim3;
GO:0016323	180	30	8.42469	3.56096	2.52536e-08	9.42154e-07	cellular_component:basolateral plasma membrane	Cnnm2;Scrib;Myo1d;Nkd2;Stxbp3;Kcnn4;Erbb2;B4galt1;Abcc4;Tlr9;Slc23a2;Rhbg;Ctnna2;Slc9a1;Ptk2;Slc38a3;Dlg4;Cadm1;Itga3;Rapgef4;Naip1;Kcnq1;Atp2b4;Ank3;Atp2b1;Atp7b;Hfe2;Anxa2;Slc2a1;Ezr;
GO:0060021	82	20	3.83792	5.21116	2.53403e-08	9.42154e-07	biological_process:roof of mouth development	Col11a2;Sos1;Wnt5a;Schip1;Nprl3;Ift172;Wnt7a;Tbx2;Gli3;Smad4;Ephb2;Chd7;Pdgfra;Tgfbr3;Wnt8a;Prdm16;Smad2;Wdpcp;Dhrs3;Mef2c;
GO:0048666	50	16	2.34019	6.83705	2.64378e-08	9.78325e-07	biological_process:neuron development	Runx1;Tenm1;Tgfb2;Pbx3;Ncam1;Trp73;Tenm2;Gabra5;Fig4;Lif;Gli2;Pacsin1;Tenm4;Atp8a2;Alk;Mef2c;
GO:0000187	74	19	3.46348	5.48581	2.78497e-08	1.02242e-06	biological_process:activation of MAPK activity	Ntrk3;Pxn;Cd74;Map2k5;Map2k3;Wnt5a;Trp73;Lrrk2;Plce1;Map2k2;Kit;Cspg4;Grm4;Egf;Map2k1;Map3k5;Hgf;Insr;Alk;
GO:0006954	308	41	14.4156	2.84415	2.78901e-08	1.02242e-06	biological_process:inflammatory response	Afap1l2;Chia1;Cspg4;Slc11a1;Irak2;Hdac9;Tlr9;Crhbp;Akt1;Epha2;Tnip1;Sdc1;Bmp6;Camk1d;Camk4;Tlr5;Tnfrsf8;Chil3;Kit;Ngfr;Ptgs1;Nrros;Map2k3;Tusc2;Tnfrsf26;Mep1b;Itgb6;Zc3h12a;Dab2ip;Sgms1;Fas;Naip5;Hyal3;Trp73;Pik3cd;Sema7a;Il34;Rps6ka5;Nlrp1a;Ncf1;Bmpr1b;
GO:0030336	101	22	4.72719	4.65393	3.02935e-08	1.10536e-06	biological_process:negative regulation of cell migration	Ptprj;Nisch;Dach1;Abhd2;Podn;Ptn;Erdr1;Tpm1;Dlc1;Magi2;Tmeff2;Srgap1;Abr;Sulf1;Robo1;Rap2a;Ptpru;Reck;Srgap2;Muc2;Ptk2;Nf1;
GO:0031532	51	16	2.387	6.70299	3.32766e-08	1.20299e-06	biological_process:actin cytoskeleton reorganization	Brsk2;Tnik;Cdc42bpb;Ptpn1;Sipa1l1;Eps8;Smap1;Ptk7;Rap2a;Farp2;Ezr;Antxr1;Insrr;Fer;Kit;Sptan1;
GO:0005903	75	19	3.51029	5.41266	3.34292e-08	1.20299e-06	cellular_component:brush border	Rapgef4;Myo1e;Myo18a;Capzb;Myo1d;Plec;Myo15b;Diaph1;Myo5b;Itpr3;Myh11;Eps8;Flnb;Ezr;Lrp2;Dcxr;Atp6v0a4;Dab1;Myo6;
GO:0030334	75	19	3.51029	5.41266	3.34292e-08	1.20299e-06	biological_process:regulation of cell migration	Itgb3;Vcl;Ldb2;Lama1;Plxnc1;Ldb1;Tbccd1;Lmna;Rcc2;Ptk2b;Lama2;Gna13;Akt1;Plxna4;Smarca4;Lama5;Lama4;Unc5c;Hace1;
GO:0004702	68	18	3.18266	5.65564	4.30607e-08	1.53551e-06	molecular_function:obsolete signal transducer, downstream of receptor, with serine/threonine kinase activity	Tnik;Adck5;Tgfb2;Map4k4;Map2k5;Map2k3;Map2k2;Adrbk2;Map2k1;Nek4;Acvr1b;Oxsr1;Alpk1;Stk25;Alpk3;Map4k1;Bmpr1b;Stk3;
GO:0050839	68	18	3.18266	5.65564	4.30607e-08	1.53551e-06	molecular_function:cell adhesion molecule binding	Itgb3;Cadm1;Tenm3;Shtn1;Fgfr1;Nectin4;Tenm2;Nectin2;Nlgn3;Fer;Nlgn2;Mllt4;Itgb2;Tenm1;Ezr;Ptprd;Cdhr5;Tenm4;
GO:0001725	60	17	2.80823	6.05363	4.39205e-08	1.55908e-06	cellular_component:stress fiber	Mst1r;Klhl2;Pxn;Palld;Vcl;Myh11;Mprip;Enah;Anxa2;Flnb;Pdlim2;Ablim3;Ptk2;Sipa1l3;Mylk;Dlc1;Actn4;
GO:0043410	104	22	4.8676	4.51968	4.75252e-08	1.67944e-06	biological_process:positive regulation of MAPK cascade	Itgb3;Sorbs3;Prkce;Flt1;Igf1r;Cdon;Fgfr1;Lif;Ksr2;Kit;Erbb2;Ngfr;Ntrk2;Ksr1;Dab2ip;Ripk1;Adra1b;Fgf9;Fas;Wwc1;Cd84;Insr;
GO:0042391	96	21	4.49317	4.67376	5.78755e-08	2.03602e-06	biological_process:regulation of membrane potential	Kcnk2;Cnih3;Wwp2;Asic2;Grik3;Glrb;Kcnq1;Lrrk2;Cacng2;Pex5l;Grik5;Ano1;Asic1;Piezo2;Piezo1;Kcnh1;Cacna1a;Kcnh5;Cnih2;Glra1;Dpp6;
GO:0019903	87	20	4.07193	4.91167	5.87153e-08	2.05635e-06	molecular_function:protein phosphatase binding	Skap1;Traf2;Kcnn4;Pard3;Itpr1;Csk;Ppp6r3;Erbb2;Ppp1cc;Ppp6r2;Vcan;Map3k5;Ppp6r1;Anapc5;Fbxl2;Dlg2;Jak3;Iqgap1;Insr;Dlg4;
GO:0008237	156	27	7.3014	3.69792	6.18052e-08	2.15494e-06	molecular_function:metallopeptidase activity	Dpp3;Adamts20;Tll1;Dpep2;Agtpbp1;Spg7;Adamts2;Agbl1;Mep1b;Adam1a;Cpz;Mmp14;Dnpep;Papln;Cpq;Adamts18;Lvrn;Adamts12;Adam22;Agbl4;Amz1;Ace2;Mep1a;Stambp;Ece1;Nln;Bmp1;
GO:0000902	79	19	3.6975	5.1386	6.7621e-08	2.34728e-06	biological_process:cell morphogenesis	Ptpro;Tgfb2;Tenm3;Capzb;Tenm2;Tbccd1;Fry;Ss18;Cap2;Ephb2;Tenm1;Atp2b2;Wnt8a;Smarca4;Gp1ba;Prdm14;Hgf;Ssh1;Tenm4;
GO:0032259	168	28	7.86304	3.56096	7.18991e-08	2.48479e-06	biological_process:methylation	Dnmt1;Cmtr2;Prdm6;Mettl13;Mettl22;Camkmt;Bhmt2;Prdm10;Mettl16;Setd3;Mtr;Prdm14;Tpmt;Henmt1;Prdm11;Setdb1;Smyd3;Trmt61a;Mettl8;Whsc1l1;Setd7;Gamt;Prdm9;Suv39h2;Ehmt1;Kmt2c;2700097O09Rik;Alkbh8;
GO:0031225	137	25	6.41213	3.89886	7.63709e-08	2.62776e-06	cellular_component:anchored component of membrane	Ly6f;Lypd6b;Dpep2;Alpl;Rtn4rl1;Otoa;Gpc6;Rtn4rl2;Cntn5;Reck;Cdh13;Gpc5;Mdga2;Tecta;Negr1;Sema7a;Lsamp;Cntn6;Hfe2;Enpp6;Raet1e;Cntn1;Ntm;Ncam1;Efna5;
GO:0005543	80	19	3.74431	5.07437	8.0146e-08	2.74561e-06	molecular_function:phospholipid binding	Syt14;Agap1;Wdfy3;Amph;Nup35;Pacsin1;Syt1;Prex1;Pitpnm1;Pitpnb;Cptp;Pitpnm2;Wdfy4;Dab1;Arhgap26;Hip1;Myof;Gle1;Baiap2l2;
GO:0030030	148	26	6.92697	3.75345	8.2663e-08	2.81953e-06	biological_process:cell projection organization	Atp6v0d1;Dync2h1;Ak7;Capzb;Bbs9;Aurka;Dync2li1;Ttc8;Akt1;Tctn2;Dcdc2a;Ift43;Crocc;Ahi1;Tekt4;Ick;Twf2;Myo7a;Ccdc13;Rp1l1;Boc;2700049A03Rik;Cc2d2a;Wdr60;Wdpcp;Tctn1;
GO:0051092	108	22	5.05481	4.35229	8.46571e-08	2.87504e-06	biological_process:positive regulation of NF-kappaB transcription factor activity	Map3k13;Card11;Trim32;Ube2v1;Camk2a;Capn3;Wnt5a;Card14;Tnfrsf8;Prdx3;Traf2;Fer;Trim14;Rps6ka5;Itgb2;Tgfbr3;Irak2;Tlr9;Ripk1;Trim8;Eif2ak2;Cd84;
GO:0003713	170	28	7.95665	3.51907	8.9414e-08	3.0235e-06	molecular_function:transcription coactivator activity	Ctbp2;Arl2bp;Trrap;Tfap2b;Ppargc1a;Edf1;Mta1;Setd3;Ncoa2;Smarcb1;Ppard;Mkl2;Tada1;Ncoa6;Mkl1;Esrrb;Prpf6;Gtf2a1l;Maml2;Crebbp;Rara;Maml3;Ncoa1;Sap130;Prdm16;Smarca4;Kat2b;Wwc1;
GO:0055037	90	20	4.21235	4.74795	9.47339e-08	3.18965e-06	cellular_component:recycling endosome	Slc31a1;Tnik;Slc9a9;Gria1;Commd1;Rab11fip3;Aatk;Grip1;Dync1i1;Rab10;Sorl1;Syt11;Lmtk2;Atp11a;Sh3tc2;Trf;Rap2a;Slc9a7;Atp9a;Fig4;
GO:0003777	64	17	2.99545	5.67528	9.6864e-08	3.24743e-06	molecular_function:microtubule motor activity	Kif3c;Klc3;Dnah17;Dync2h1;Dnah12;Kif18a;Dync1i1;Kifc3;Kif5c;Dnah8;Dnah1;Kifc1;Dnah10;Kif9;Kif13b;Klc1;Kif26b;
GO:0018108	65	17	3.04225	5.58797	1.17066e-07	3.90802e-06	biological_process:peptidyl-tyrosine phosphorylation	Pxn;Flt1;Fgfr1;Fgfr4;Fer;Kit;Fes;Dyrk1a;Ephb2;Pdgfra;Ptk2b;Egf;Fyn;Abl2;Jak3;Ptk2;Insr;
GO:0008168	162	27	7.58222	3.56096	1.2145e-07	4.0372e-06	molecular_function:methyltransferase activity	Dnmt1;Cmtr2;Prdm6;Mettl13;Mettl22;Camkmt;Bhmt2;Prdm10;Mettl16;Setd3;Mtr;Prdm14;Tpmt;Henmt1;Prdm11;Setdb1;Smyd3;Trmt61a;Mettl8;Whsc1l1;Setd7;Gamt;Prdm9;Suv39h2;Ehmt1;Kmt2c;Alkbh8;
GO:0007628	42	14	1.96576	7.12192	1.27573e-07	4.22284e-06	biological_process:adult walking behavior	Chd7;Agtpbp1;Cacna1a;Glrb;Atg7;Oxr1;Cacna1c;Mapt;Scn8a;Efnb3;Glra1;Dab1;Pcdh15;Hipk2;
GO:0043524	153	26	7.16099	3.63078	1.47006e-07	4.84563e-06	biological_process:negative regulation of neuron apoptotic process	Gpi1;Tfap2b;Ppargc1a;Gclc;Hipk2;Ntrk2;Fam134b;Itsn1;Cacna1a;Fyn;Tert;Mef2c;Aars;Trp73;Gabra5;Glp1r;Prdx3;Ngfr;Ptk2b;Stambp;Kdm2b;Oxr1;Faim2;Gdnf;Chl1;Park2;
GO:0048813	43	14	2.01256	6.9563	1.62088e-07	5.32043e-06	biological_process:dendrite morphogenesis	Kidins220;Prex2;Camk2a;Fmn1;Dscam;Dclk1;Farp1;Lrp8;Map6;Cacna1a;Fyn;Abl2;Ctnna2;Dcdc2a;
GO:0010629	257	35	12.0286	2.90973	1.66377e-07	5.41901e-06	biological_process:negative regulation of gene expression	Slit3;Rbl2;Bak1;Tgfbr3;Akt1;Tert;Zfp148;Insr;Mef2c;Rbl1;Mkks;Musk;Ppp3ca;Ptpn22;Fgfr4;Tbk1;Zbtb20;Sfmbt2;Smad2;Mdm2;Park2;Tgfb2;Fgfr1;Acacb;Mir338;Zc3h12a;Fyn;Bcl11a;Mir34a;Wwp2;Map2k2;Rara;Map2k1;Nr1h2;Acvr1b;
GO:0001077	245	34	11.4669	2.96505	1.66473e-07	5.41901e-06	molecular_function:proximal promoter DNA-binding transcription activator activity, RNA polymerase II-specific	Camta2;Tfeb;Elf1;Tfap2b;Tbx20;Mesp2;Pbx1;Nfatc3;Nfatc1;Smad4;Ebf1;Nfic;Creb5;Pax5;Txk;Mef2c;Camta1;Trp73;Ebf2;Gli2;Nfatc2;Runx2;Ddit3;Figla;Nrf1;Batf;Bcl11b;Nr1h2;Myog;Glis2;Tead4;Smad2;Arnt2;Ppara;
GO:0008344	67	17	3.13586	5.42117	1.69403e-07	5.49159e-06	biological_process:adult locomotory behavior	Dmbx1;Prex2;Btbd9;Gigyf2;Cdh23;Sncg;Scn8a;Fgf12;Pcdh15;Hipk2;Eps8;Pbx3;Chl1;Park2;Tshr;Atxn1;Adam22;
GO:0000977	211	31	9.87561	3.13905	1.86597e-07	5.99941e-06	molecular_function:RNA polymerase II regulatory region sequence-specific DNA binding	Nfix;Elf5;Tbx20;H2afy;Actn4;Gli3;Smad4;Runx1;Klf12;Hnf1b;Cux2;Smad3;Mef2c;Dmbx1;Pknox2;Rarb;Ikzf3;Foxk1;Klf9;Crebbp;Rara;Phf21b;Glis1;Suv39h2;Dlx2;Smarca4;Myog;Glis2;Kat2b;Gatad2a;Rora;
GO:0016055	211	31	9.87561	3.13905	1.86597e-07	5.99941e-06	biological_process:Wnt signaling pathway	Ndrg2;Nxn;Amotl2;Wnt5b;Tnks2;Cyld;Nkd2;Ldb1;Wnt7a;Cpz;Dkk3;Wnt7b;Cdk14;Ror1;Wnt8a;Tle3;Wwox;Tnik;Invs;Wnt9a;Wnt5a;Usp34;Rnf43;Mark2;Rspo1;Ddit3;Dact3;Ror2;Ptk7;Nkd1;Disc1;
GO:0043087	68	17	3.18266	5.34144	2.02867e-07	6.49588e-06	biological_process:regulation of GTPase activity	Crk;Arhgap1;Vav3;Vav2;Rasal1;Dgki;Ngef;Ntrk2;Adap1;Sipa1l1;Dab2ip;Rasal3;Iqgap1;Rasa3;Nf1;Efna5;Racgap1;
GO:0017124	115	22	5.38244	4.08737	2.19274e-07	6.99271e-06	molecular_function:SH3 domain binding	Prkce;Arhgap1;Afap1l2;Fmn1;Enah;Sos1;Sirpa;Dennd1a;Mapt;Ptpn22;Grik5;Shank1;Shank2;Evl;Dab2ip;Elmo1;Cttnbp2;Cntnap1;Lrp2;Dock3;Ncf1;Sh3bp1;
GO:0005765	168	27	7.86304	3.43378	2.31278e-07	7.31887e-06	cellular_component:lysosomal membrane	Atp6v0d1;Slc30a2;Zfyve26;Tmem192;Clcn7;Litaf;Atp11a;Egf;H13;Cyb561a3;Tpcn1;Col6a1;Lrp2;Atp6v1c1;Oca2;Slc2a8;Tecpr1;Dpp4;Gna11;Rptor;Myo7a;Ece1;Anxa2;Clcn5;Atp6v1b2;Gnaq;Atp6v0a4;
GO:0004842	319	40	14.9304	2.67909	2.31368e-07	7.31887e-06	molecular_function:ubiquitin-protein transferase activity	Wdsub1;Klhl13;Lrsam1;Herc3;Rnf141;Klhl40;Asb14;Mgrn1;Trim8;March4;Klhl2;Naip1;Spsb1;Rnf43;Ipp;Bach2;Rbbp6;Rnf220;Pdzrn3;Mdm2;Trim71;Gm15800;Park2;Klhl38;Trim32;March2;Klhl3;Trim27;Mib1;Neurl1a;Tceb1;Fbxl2;Naip5;Wwp2;Traf2;Rnf130;Fancl;Asb18;Arih2;Hace1;
GO:0051965	69	17	3.22946	5.26403	2.42239e-07	7.632e-06	biological_process:positive regulation of synapse assembly	Stau2;Ntrk3;Ephb1;Asic2;Lrrtm4;Prkca;Nlgn3;Wnt7a;Nlgn2;Ephb2;Ntrk2;Lingo2;Adgrb1;Adgrb2;Cux2;Clstn3;Efna5;
GO:0098779	126	23	5.89728	3.9001	2.45762e-07	7.71201e-06	biological_process:positive regulation of mitophagy in response to mitochondrial depolarization	Mbd5;D430041D05Rik;Slc6a1;Kcnk3;Gabra5;Zfp189;Mylk;Cspg5;Boc;Map2k1;Myh11;Asb2;Dpf3;Nr2c2;Slc22a3;Ulk1;Alpk1;Slc37a4;Park2;Sntg1;Ist1;Cd93;Bloc1s1;
GO:0071805	87	19	4.07193	4.66609	2.47145e-07	7.72452e-06	biological_process:potassium ion transmembrane transport	Slc9a9;Kcnk2;Slc9a8;Kcnt1;Kcnk3;Kcnq5;Kcnip4;Kcnq1;Kcnmb2;Kcnb1;Kcnq2;Kcnh1;Kcnk13;Kcnh5;Kcnq4;Slc9a7;Kcnmb3;Slc9a1;Kcnc4;
GO:0004715	45	14	2.10617	6.64713	2.57366e-07	8.01206e-06	molecular_function:non-membrane spanning protein tyrosine kinase activity	Ptk2b;Blk;Matk;Tyk2;Fyn;Abl2;Jak3;Txk;Ptk2;Fer;Eif2ak2;Csk;Fes;Dyrk1a;
GO:0007612	61	16	2.85503	5.60414	2.63966e-07	8.18503e-06	biological_process:learning	Shank2;Ntrk2;Grm4;Slc6a1;Cntnap2;Ctnnd2;Slc24a2;Amph;Ptn;Nlgn3;Atad1;Abl2;Park2;Atp8a1;Ptgs1;Ephb2;
GO:0006357	388	45	18.1599	2.47799	2.72016e-07	8.37986e-06	biological_process:regulation of transcription by RNA polymerase II	Camta2;Snapc4;Med12l;Taf4b;Rbl2;Tceal7;Twist2;Btbd8;Smad4;Rad21;Txk;Ttc21b;Smad3;Med13l;Ldb2;Elp3;Rbl1;Atp2b4;Erg;Tfcp2;Batf;Pknox1;Glis2;Tead4;Zfp667;Safb;Nfatc1;Fhl2;Mlxip;Smarcb1;Thra;Tshz2;Npas3;Mkl1;Pknox2;Gnas;Lcor;Elmsan1;Foxk1;Nrf1;Nr1h2;Glis1;Supt5;Dlx2;Ikbkap;
GO:0052697	9	8	0.421235	18.9918	2.72386e-07	8.37986e-06	biological_process:xenobiotic glucuronidation	Ugt1a6a;Ugt1a5;Ugt1a10;Ugt1a7c;Ugt1a6b;Ugt1a1;Ugt1a2;Ugt1a9;
GO:0005813	425	48	19.8916	2.41308	2.7617e-07	8.46311e-06	cellular_component:centrosome	Ndrg2;Pde4dip;Nin;Zfyve26;Chd4;Cntrob;Cdc14a;Sfi1;Nek10;Plekha7;Ttc28;Ist1;Crocc;Lrrc45;Cdk6;Kifc3;Mkks;Ccdc13;Katnb1;Pde4d;Disc1;Sclt1;Ppp1r12a;Ikzf4;Atp6v0d1;Brsk2;Cdh23;Rab11fip3;Arl2bp;Cyld;Mib1;Aurka;Ttll5;H2afy;Ccdc64;Nckap5l;Ttc8;Tubgcp2;Cspp1;Ahi1;Ttc12;Mtus2;Brsk1;Haus4;2700049A03Rik;Eya3;Tsen2;Cpeb1;
GO:0002230	117	22	5.47605	4.0175	2.84145e-07	8.67361e-06	biological_process:positive regulation of defense response to virus by host	Mtss1;Ackr3;Tnik;Mbd5;D430041D05Rik;Kcnq1;Sin3a;Gabra5;Ptpn22;Zfp189;Mylk;Cspg5;Zc3h12a;Fancl;Asb2;Dpf3;Tead4;Alpk1;Slc37a4;Sntg1;Ist1;Cd93;
GO:0006397	308	39	14.4156	2.70541	2.99352e-07	9.1024e-06	biological_process:mRNA processing	Wdr33;Srpk2;Ptbp3;Sugp2;Rbm27;Celf4;Ncbp3;Papd5;Rbbp6;Eftud2;Dcps;Raly;Rbfox1;Ddx39b;Khsrp;Cmtr2;Plcb1;Lsm1;Sugp1;Rbm4b;Tsen54;Cpsf1;Prpf6;Smn1;Zfp326;Hnrnpf;Cwc22;Rbfox3;Apobec2;Celf2;Casc3;Rbm38;Rnps1;Gemin5;Tsen2;Cdc40;Cpeb1;Celf3;Pan2;
GO:0046580	25	11	1.1701	9.40094	3.07367e-07	9.31002e-06	biological_process:negative regulation of Ras protein signal transduction	Rasal3;Rasal1;Stambp;Mfn2;Rasa3;Rasal2;Tgfb2;Dab2ip;Mapkap1;Nf1;Dgkz;
GO:0042472	71	17	3.32307	5.11575	3.42508e-07	1.03345e-05	biological_process:inner ear morphogenesis	Cdh23;Wnt5a;Fgfr1;Eya1;Myo7a;Chrna10;Atp8a2;Ephb2;Chd7;Celsr1;Ror2;Abr;Atp2b2;Pax2;Fgf9;Kcnq4;Myo6;
GO:0003007	63	16	2.94864	5.42623	3.82337e-07	1.14921e-05	biological_process:heart morphogenesis	Chd7;Ttn;Col5a1;Ptch1;Smarcd3;Tab1;Tgfb2;Sos1;Nipbl;Pbrm1;Zmiz1;Tbx2;Dlc1;Mkl2;Insr;Asxl2;
GO:0051216	72	17	3.36988	5.0447	4.05624e-07	1.21455e-05	biological_process:cartilage development	Col11a2;Bmp6;Zeb1;Gnas;Pax7;Chst11;Wnt5a;Sox5;Mkks;Lect1;Zbtb16;Wnt7a;Chrdl2;Sulf1;Dlx2;Bmp1;Bmpr1b;
GO:0030182	111	21	5.19523	4.04217	4.78767e-07	1.42811e-05	biological_process:neuron differentiation	Brsk2;Dync2h1;Wnt9a;Wnt5b;Corin;Ldb1;Brsk1;Runx2;Hipk2;Runx1;Cntn6;Ppp1cc;Ntrk2;Map2k1;Atp2b2;Adnp2;Wnt8a;Ptprd;Epha2;Gdnf;Mef2c;
GO:0019902	48	14	2.24658	6.23168	4.95612e-07	1.47276e-05	molecular_function:phosphatase binding	Sbf2;Ell;Sh3rf2;Sh2d4a;Mapk1;Sfi1;Ncam1;Ppp1r37;Cd300a;Elfn1;Smad2;Ppara;Magi2;Smad3;
GO:0001649	102	20	4.77399	4.18937	5.41901e-07	1.60423e-05	biological_process:osteoblast differentiation	Bmp6;Snd1;Alpl;Gli2;Sema7a;Twist2;Itga11;Runx2;Fhl2;Tgfbr3;Vcan;Akt1;Fgf9;Col6a1;Epha2;Erh;Nf1;Wwox;Smad3;Mef2c;
GO:0008360	133	23	6.22491	3.69483	5.67175e-07	1.67274e-05	biological_process:regulation of cell shape	Myo10;Pxn;Gna12;Ptn;Arhgap15;Arap1;Fes;Rhoj;Gna13;Cdc42ep3;Fyn;Ptk2;Baiap2;Epb41l3;Tbccd1;Diaph1;Kit;Dlc1;Cdc42se2;Ptk2b;Eps8;Ezr;Sema4d;
GO:0048013	34	12	1.59133	7.54086	6.07229e-07	1.78416e-05	biological_process:ephrin receptor signaling pathway	Anks1;Crk;Ephb1;Sipa1l1;Epha6;Epha2;Ss18;Ptk2;Ngef;Efnb3;Efna5;Ephb2;
GO:0007229	66	16	3.08905	5.17958	6.51016e-07	1.90568e-05	biological_process:integrin-mediated signaling pathway	Itgb3;Pxn;Itga3;Vav3;Sema7a;Itgb5;Itga11;Rcc2;Itgb6;Tyrobp;Ptk2b;Itgb2;Lama5;Txk;Ptk2;Itga9;
GO:0042384	124	22	5.80368	3.7907	6.75552e-07	1.97015e-05	biological_process:cilium assembly	Ahi1;Dync2h1;Cfap53;Dzip1;Celsr3;Bbs9;Mkks;Ick;Ttll8;Ift172;2700049A03Rik;Dync2li1;Ttc8;Abcc4;Cdc14a;Disc1;Sclt1;Cc2d2a;Tctn2;Lama5;Wdpcp;Ablim3;
GO:0005518	58	15	2.71462	5.52563	7.19298e-07	2.08225e-05	molecular_function:collagen binding	Abi3bp;Tll1;Itga3;Dpp4;Podn;Vwf;Thbs4;Antxr1;Itga11;Cspg4;Smad3;Itga9;Smad4;Lrrc15;Adgrg1;
GO:0050885	58	15	2.71462	5.52563	7.19298e-07	2.08225e-05	biological_process:neuromuscular process controlling balance	Gigyf2;Abr;Atp2b2;Cacna1a;Aars;Camk2b;Camta1;Tnr;Abl2;Cntnap1;Clic5;Shank1;Rbfox1;Nlgn2;Dlg4;
GO:0005769	180	27	8.42469	3.20486	7.69462e-07	2.21928e-05	cellular_component:early endosome	Atp6v0d1;Rab22a;Commd1;Mapk1;Vps26a;Cntnap2;Rab31;Rabgap1l;Ptpn1;Fam21;Mvb12b;Mgrn1;Bloc1s1;Gria1;Kcnq1;Usp10;Sorl1;Prdx3;Map2k2;Lmtk2;Map2k1;Trf;Ece1;Anxa2;Atp9a;Tbc1d16;Dner;
GO:0005635	136	23	6.36532	3.61333	7.98186e-07	2.29369e-05	cellular_component:nuclear envelope	Ryr2;Syne2;Tnks2;Rae1;Lmnb2;Chmp7;Mta1;Bin1;Rab40b;Mlip;Sun1;Wdfy3;Lmna;Gpx4;Itpr1;Syne1;Ngfr;Itpr3;Anxa11;Nup98;Fancl;Spag4;Ptgs1;
GO:0007409	105	20	4.9144	4.06967	8.0698e-07	2.3105e-05	biological_process:axonogenesis	Brsk2;Lingo1;Slit1;Smn1;Igf1r;Shtn1;Wnt5a;Rab10;Mapt;Lrfn2;Brsk1;Ank3;Atp8a2;Bcl11b;Dclk1;Rnf165;Kalrn;Ulk1;Ctnna2;Dst;
GO:0008092	59	15	2.76143	5.43198	8.64636e-07	2.46657e-05	molecular_function:cytoskeletal protein binding	Epb41l3;B4galt1;Farp1;Anxa2;Plec;Epb41l1;Farp2;Ezr;Epb41l4a;Frmd5;Pacsin1;Ank3;Fer;Pacsin3;Dst;
GO:0007268	170	26	7.95665	3.26771	8.80264e-07	2.50206e-05	biological_process:chemical synaptic transmission	Exoc4;Rapsn;Nrxn2;Grm4;Sv2b;P2rx3;Cacna1a;Cacna1c;Dlg2;Slc6a11;Myo6;Gria1;Slc6a1;Lrp8;Cacnb2;Glrb;Gabra5;Kcnmb2;Sncg;Unc13b;Grik5;Fgf12;Apba2;Slc12a7;Kcnmb3;Glra1;
GO:0010923	51	14	2.387	5.86511	9.15583e-07	2.59261e-05	biological_process:negative regulation of phosphatase activity	Spocd1;Ell;Sh3rf2;Sh2d4a;Rimbp2;Csrnp3;Farp1;Tmem132d;Sfi1;Myo1d;Ppp1r37;Elfn1;Dlg2;Arfgef3;
GO:0001666	106	20	4.96121	4.03128	9.18733e-07	2.59261e-05	biological_process:response to hypoxia	Ryr2;Flt1;Dpp4;Tgfb2;Cbfa2t3;Itpr1;Nfatc3;Smad4;Ang;Itpr2;Ece1;P2rx3;Ryr1;Arnt2;Raf1;Nf1;Ppara;Smad3;Slc2a8;Crhr1;
GO:0044212	230	31	10.7649	2.87973	9.81518e-07	2.75986e-05	molecular_function:transcription regulatory region DNA binding	Snapc4;Tfeb;Hdac4;Hivep3;Sox5;Atmin;H2afy;Zfp821;Smad4;Tcf20;Pax2;Bcl11a;Hnf1b;Rreb1;Thra;Smad3;Mef2c;Smarca2;Wnt5a;Trp73;Zfp957;Elmsan1;Gli2;Nfatc2;Runx2;Ddit3;Rara;Dhx36;Glis2;Ikzf4;Ash2l;
GO:0019898	78	17	3.6507	4.65664	1.06162e-06	2.97444e-05	cellular_component:extrinsic component of membrane	Epb41l3;Wdfy3;Scp2;Epb41l1;Bsn;Atg2a;Rgs6;Farp1;Mtmr3;Farp2;Ezr;Epb41l4a;Frmd5;Mcf2l;Wdfy4;Jakmip1;Ncf1;
GO:0007266	44	13	2.05937	6.31261	1.11384e-06	3.09893e-05	biological_process:Rho protein signal transduction	Rhoj;Celsr1;Cdh13;Arhgef11;Myo9b;Gna13;Cdc42ep3;Srgap1;Gna12;Kalrn;Mcf2l;Baiap2;Adgrg1;
GO:0031252	52	14	2.4338	5.75232	1.11396e-06	3.09893e-05	cellular_component:cell leading edge	Arhgap1;Pxn;Gbf1;Ywhaz;Shtn1;Scrib;Ldb2;Lrrc16a;Bcas3;Dock8;Ldb1;Iqgap1;Itgb5;Arf1;
GO:2000311	17	9	0.795665	11.3113	1.12545e-06	3.11985e-05	biological_process:regulation of AMPA receptor activity	Cnih2;Nlgn3;Cacng2;Cnih3;Cacng4;Shank1;Shisa9;Nlgn2;Mef2c;
GO:0005770	118	21	5.52285	3.80238	1.14459e-06	3.16174e-05	cellular_component:late endosome	Kidins220;Slc31a1;Rab7;Cd74;Mapk1;Kcnq1;Ap5s1;Rab31;Slc30a2;Tmem192;Map2k2;Magi2;Ddit3;Sdf4;Rab27a;Atp7b;Slc11a1;Map2k1;Trf;Mvb12b;Arf1;
GO:0009887	108	20	5.05481	3.95662	1.18557e-06	3.26345e-05	biological_process:animal organ morphogenesis	Prkar1b;Slit3;Igf1r;Pax7;Wnt5b;Mapk1;Wnt5a;Eya1;Prkar1a;Wnt7a;Pbx1;Ephb2;Pdgfra;Ptch1;Gamt;Lama5;Pax5;Thra;Insr;Crkl;
GO:0098792	98	19	4.58678	4.14234	1.19172e-06	3.2689e-05	biological_process:xenophagy	Mtss1;Ackr3;Tnik;Mbd5;D430041D05Rik;Kcnq1;Gabra5;Zfp189;Mylk;Cspg5;Fancl;Asb2;Dpf3;Tead4;Alpk1;Slc37a4;Sntg1;Ist1;Cd93;
GO:0001948	79	17	3.6975	4.5977	1.23605e-06	3.37869e-05	molecular_function:protein binding	Sdc1;Itga3;Azgp1;Lrp8;Fgfr1;Ace2;Lrrk2;Foxred2;Erbb2;Hfe2;Itgb2;Erlec1;Cntn1;Vwf;Fyn;Cd6;Bmpr1b;
GO:0030246	197	28	9.22036	3.03676	1.26265e-06	3.4394e-05	molecular_function:carbohydrate binding	Tkt;Galnt14;Fcna;Mag;Dgcr2;Klra7;Galnt18;Gm5065;Man2b1;Atrnl1;Cd22;Gfpt2;Galnt15;Eva1c;Chil3;Klra1;Galnt6;Galnt2;Cntn1;Clec2g;Ncan;Vcan;Wbscr17;Man2b2;Zp3;Galnt5;Cd93;Gbe1;
GO:0007224	70	16	3.27627	4.8836	1.27131e-06	3.45102e-05	biological_process:smoothened signaling pathway	Cdon;Dzip1;Gli2;Hhat;Ift172;Evc;Gli3;Hipk2;Boc;Ror2;2700049A03Rik;Ptch1;Cc2d2a;Tctn2;Wdpcp;Ttc21b;
GO:0005525	343	40	16.0537	2.49164	1.29438e-06	3.50151e-05	molecular_function:GTP binding	Rab7;Tgm2;Gna12;Nin;Rab44;Dapk1;Rab27a;Rab3c;Rab25;Rab3b;Insr;Arf1;Mfn2;Rab6b;Gna11;Gtpbp1;Rab12;Arf3;Gnao1;Rap2a;Eftud2;Gnaq;Nuggc;Rab22a;Rab31;Hhat;Rhoj;Gna13;Arl13a;Agap3;Rab40b;Gspt1;Agap1;Gnas;Rab10;Lrrk2;Lrrk1;Gna14;Glud1;Rheb;
GO:0007517	62	15	2.90184	5.16914	1.47228e-06	3.96907e-05	biological_process:muscle organ development	Mtss1;Zfhx3;Col19a1;Pax7;Zbtb42;Mov10l1;Nphs1;Jph1;Sgcz;Myog;Lama5;Scn8a;Foxk1;Sgcd;Mkl2;
GO:0005201	38	12	1.77855	6.74708	1.60243e-06	4.30516e-05	molecular_function:extracellular matrix structural constituent	Col11a2;Fbn2;Col5a1;Ncan;Vcan;Lama1;Col4a2;Col4a1;Fbn1;Tecta;Col24a1;Col27a1;
GO:0031982	132	22	6.17811	3.56096	1.69183e-06	4.52984e-05	cellular_component:vesicle	Tkt;Vps26a;Kcnn4;Gstp1;Rab3c;Akt1;Mvb12b;Klc1;Rab3b;Lrpap1;Gnas;Dync1i1;Syt11;Eps8;Ece1;Trf;Anxa2;Kif9;Slc2a1;Ezr;Slc30a7;Crhr1;
GO:0006897	177	26	8.28428	3.13848	1.71958e-06	4.58848e-05	biological_process:endocytosis	Rab22a;Myo1e;March2;Lrp1b;Dennd1a;Ap2a2;3110043O21Rik;Pacsin1;Pacsin3;Esyt2;Itsn1;Bin1;Lrp2;Stab2;Rin1;Hip1;Myo6;Scamp1;Fnbp1;Lrp8;Lrrk2;Sorl1;Lrp11;Atp9a;Clcn5;Rin2;
GO:0000165	63	15	2.94864	5.08709	1.74705e-06	4.64598e-05	biological_process:MAPK cascade	Ptk2b;Slc11a1;Map2k1;Map2k5;Map2k3;Mapk1;Map3k5;Nphs1;Lrrk2;Raf1;Map2k2;Ptk2;Nf1;Itpkb;Mef2c;
GO:0016042	102	19	4.77399	3.9799	2.00589e-06	5.30831e-05	biological_process:lipid catabolic process	Rab7;Abhd2;Dagla;Pla2g4e;Plch2;Plce1;Bscl2;Plcb1;Plcg2;Pnliprp2;Enpp6;Pnpla5;Nceh1;Plb1;Pnpla3;Plcg1;Ddhd1;Plcxd3;Pla2g6;
GO:0030155	39	12	1.82535	6.57408	2.00965e-06	5.30831e-05	biological_process:regulation of cell adhesion	Ptprj;Ptk2b;Lama2;Nuak1;Spg7;Lama1;Ppp1r12a;Lama5;Abl2;Lama4;Ptk2;Fes;
GO:0006914	134	22	6.27171	3.50781	2.10502e-06	5.54158e-05	biological_process:autophagy	Tfeb;Rab7;Rnf185;Lrsam1;Atg16l2;3110043O21Rik;Calcoco2;Fam134b;Atg7;Ulk1;Tecpr1;Mfn2;Wdfy3;Lrrk2;Usp10;Ptpn22;Atg10;Srpx;Atg2a;Rab12;Clec16a;Park2;
GO:0000123	25	10	1.1701	8.54631	2.11443e-06	5.54774e-05	cellular_component:histone acetyltransferase complex	Phf20;Trrap;Kat2b;Ikbkap;Kansl1l;Elp2;Kansl1;Ogt;Crebbp;Elp3;
GO:0006887	103	19	4.8208	3.94126	2.27595e-06	5.95161e-05	biological_process:exocytosis	Scamp5;Brsk2;Scamp1;Rapgef4;Unc13d;Cplx2;Exoc4;Nkd2;Stxbp3;Exoc3l;Unc13b;Kcnb1;Rab27a;Cadps2;Ykt6;Syt7;Syt17;Lgi3;Mical3;
GO:0042733	65	15	3.04225	4.93056	2.43821e-06	6.35473e-05	biological_process:embryonic digit morphogenesis	Gna12;Chst11;Wnt5a;Gli2;Zbtb16;Wnt7a;Tbx2;Gli3;Smad4;Ror2;Ece1;Lmbr1;Wdpcp;Gnaq;Zak;
GO:0007416	40	12	1.87215	6.40973	2.50556e-06	6.50864e-05	biological_process:synapse assembly	Shank2;Cadm1;Farp1;Cacna1a;Bsn;Kirrel3;Sdk2;Nlgn3;Nrxn2;Nlgn2;Clstn3;Myo6;
GO:0008013	84	17	3.93152	4.32402	2.56106e-06	6.63085e-05	molecular_function:beta-catenin binding	Ptprj;Ptprt;Bcl9l;Pxn;Med12l;Ctnnd2;Gli3;Dact3;Ctnna3;Ptpru;Ctnna1;Csnk2a1;Park2;Cdhr5;Rora;Smad3;Ash2l;
GO:0001501	104	19	4.8676	3.90336	2.57852e-06	6.63229e-05	biological_process:skeletal system development	Col11a2;Hdac4;Tgfb2;Gnas;Gna11;Fbn1;Gli2;Zbtb16;Runx2;Chd7;Runx1;Ror2;Ncan;Vcan;Epha2;Cacna1s;Gnaq;Smad3;Bmpr1b;
GO:0043195	104	19	4.8676	3.90336	2.57852e-06	6.63229e-05	cellular_component:terminal bouton	Scamp1;Rab7;Cplx2;Grik3;Syt2;Amph;Lrrk2;Syngr1;Pacsin1;Grik5;Syt1;Erc2;Ntrk2;Grm4;Ptprn2;Sv2b;Itsn1;P2rx3;Grik4;
GO:0006605	33	11	1.54453	7.12192	2.81308e-06	7.21197e-05	biological_process:protein targeting	Akap12;Ywhaz;Tomm20;Nbea;Sorl1;Syngr1;Ywhag;Tomm20l;Ywhab;Myo6;Rab27a;
GO:0035641	14	8	0.655254	12.209	2.92736e-06	7.4805e-05	biological_process:locomotory exploration behavior	Dpp4;Lsamp;Prkce;Lrrk2;Tnr;Nlgn2;Dlg4;Crhr1;
GO:0006909	49	13	2.29339	5.66847	3.06296e-06	7.77635e-05	biological_process:phagocytosis	Cdc42se2;Slc11a1;Syt7;Itgb2;Anxa3;Unc13d;Tusc2;Elmo1;Abl2;Gas6;Tulp1;Myo7a;Gulp1;
GO:0008081	49	13	2.29339	5.66847	3.06296e-06	7.77635e-05	molecular_function:phosphoric diester hydrolase activity	Pde10a;Enpp6;Gdpd5;Pde1c;Plcg1;Pde5a;Pde4d;Plcxd3;Pde2a;Plch2;Plce1;Plcb1;Plcg2;
GO:0048167	41	12	1.91896	6.2534	3.1063e-06	7.86093e-05	biological_process:regulation of synaptic plasticity	Rara;Gria1;Sipa1l1;Atp2b2;P2rx3;Ctnnd2;Ncam1;Ywhag;Baiap2;Crhr1;Mef2c;Myo6;
GO:0046928	20	9	0.936077	9.61459	3.19132e-06	8.05012e-05	biological_process:regulation of neurotransmitter secretion	Celsr1;Sncaip;Ntrk2;Ica1;Camk2a;Sncg;Kcnc4;Park2;Mef2c;
GO:0005930	76	16	3.55709	4.49806	3.21144e-06	8.07493e-05	cellular_component:axoneme	Dync2h1;Ak8;Wdr34;Ttll8;Gli2;Mapt;Ift172;Gli3;Rp1l1;Ccdc63;Dync2li1;Lrrc48;Cfap46;Atg7;Ccdc114;Dcdc2a;
GO:0016529	58	14	2.71462	5.15725	3.33694e-06	8.36366e-05	cellular_component:sarcoplasmic reticulum	Ryr2;Syne2;Itpr2;Camk2b;Thbs4;Ryr1;Jph1;Cacna1s;Stim1;Ank3;Itpr1;Mrvi1;Ank1;Itpr3;
GO:0007528	34	11	1.59133	6.91246	3.57178e-06	8.89543e-05	biological_process:neuromuscular junction development	Ntrk2;Pdzrn3;Cacnb2;Col4a1;Musk;Lrrk2;Cacna1s;Cacng2;Unc13b;Cacna2d2;Erbb2;
GO:0048589	34	11	1.59133	6.91246	3.57178e-06	8.89543e-05	biological_process:developmental growth	Dmbx1;Gnas;Chst11;Nipbl;Smad2;Gli2;Zmiz1;Smad3;Gli3;Eif4h;Smad4;
GO:0050770	27	10	1.2637	7.91325	3.69461e-06	9.15792e-05	biological_process:regulation of axonogenesis	Mark2;Kif13b;Slit1;Ssh1;Sipa1l1;Ssh2;Wnt7a;Slit3;Cacna1a;Ephb2;
GO:0015297	50	13	2.34019	5.5551	3.70052e-06	9.15792e-05	molecular_function:antiporter activity	Slc24a3;Slc9a9;Slc47a1;Slc9a8;Slc7a15;Slc9a7;Slc7a1;Clcn5;AU018091;Slc9a1;Clcn7;Slc38a3;Slc4a8;
GO:0007160	77	16	3.6039	4.43964	3.71713e-06	9.1701e-05	biological_process:cell-matrix adhesion	Itgb3;Pxn;Sirpa;Tecta;Otoa;Itgb5;Muc4;Itga11;Col5a3;Itgb6;Itgb2;Nid2;Lims1;Col13a1;Eda;Adamts12;
GO:0010468	284	34	13.2923	2.55787	3.75814e-06	9.24221e-05	biological_process:regulation of gene expression	Gli3;Ulk1;Slc4a5;Stab2;Mkl2;Stau2;Stk40;Cdk6;Plcg2;Ngfr;Apba2;Mdm2;Ppara;Ddx39b;Dnmt1;Asic2;Pax7;Drosha;Fgfr1;Zc3h12a;Nipbl;Fas;Prdm14;Mcph1;Nf1;Ncoa6;Tshz2;Trp73;Vav2;Rspo1;Bcl11b;Sap130;Kmt2c;Gdnf;
GO:0001974	42	12	1.96576	6.10451	3.83037e-06	9.39039e-05	biological_process:blood vessel remodeling	Chd7;Tgm2;Tgfbr3;Tgfb2;Adra1b;Lif;Mdm2;Bak1;Pbrm1;Nfatc3;Cbs;Mef2c;
GO:0002039	68	15	3.18266	4.71304	3.9361e-06	9.61954e-05	molecular_function:p53 binding	Ntrk3;Zmat4;Trp73;Usp10;Trim29;Zfp385b;Psme3;Crebbp;Setd7;Nuak1;Ehmt1;Blm;Smarca4;Smarcb1;Mdm2;
GO:0007626	108	19	5.05481	3.75879	4.18748e-06	0.000102021	biological_process:locomotory behavior	Npas3;Cdh23;Dscam;Negr1;Scn8a;Pcdh15;Chd7;Celsr1;Atp2b2;Apba2;Zdhhc8;Gnao1;Cacna1b;Adra1b;Fig4;Sepp1;Park2;Dlg4;Myo6;
GO:0005267	78	16	3.6507	4.38272	4.29301e-06	0.000104268	molecular_function:potassium channel activity	Kcnk2;Kcnt1;Kcnk3;Kcnq5;Kcnip4;Kcnq1;Kcnmb2;Kcnn4;Kcnb1;Kcnq2;Kcnh1;Kcnk13;Kcnh5;Kcnq4;Kcnc4;Trpm5;
GO:2000310	15	8	0.702058	11.3951	4.31113e-06	0.000104385	biological_process:regulation of NMDA receptor activity	Cnih2;Ptk2b;Ppargc1a;Nlgn3;Crhbp;Dlg4;Dapk1;Mef2c;
GO:0004683	21	9	0.982881	9.15675	4.37672e-06	0.000105647	molecular_function:calmodulin-dependent protein kinase activity	Mylk3;Ptk2b;Camkk1;Camk1d;Camk2a;Camk4;Camk2b;Mknk1;Dapk1;
GO:0007519	51	13	2.387	5.44618	4.45276e-06	0.000106825	biological_process:skeletal muscle tissue development	Foxp2;Meg3;Foxp1;Col19a1;Pax7;Flnb;Nphs1;Myog;Cacna1s;Svil;Nf1;Mettl8;Mef2c;
GO:0043406	51	13	2.387	5.44618	4.45276e-06	0.000106825	biological_process:positive regulation of MAP kinase activity	Mst1r;Egf;Flt1;Tab1;Pde5a;Fgfr1;Pdgfd;Iqgap1;Kit;Pik3r5;Csk;Erbb2;Pik3r6;
GO:0031338	35	11	1.63813	6.71496	4.50349e-06	0.000107713	biological_process:regulation of vesicle fusion	Tbc1d1;Grtp1;Tbc1d22a;Rabgap1l;Tbc1d16;Usp6nl;Adprhl1;Tbc1d2b;Tbc1d9b;Tbc1d9;Evi5l;
GO:0005215	176	25	8.23747	3.03491	4.55708e-06	0.000108663	molecular_function:transporter activity	Ttpal;Slc11a1;Slc22a13;Sv2b;Rlbp1;Slc23a2;Slco1a6;Slc25a38;Oca2;Slc2a8;Slco2b1;Abca3;Abca17;Slc2a13;Tmem184b;Timm9;Slc2a10;Slc12a9;Fabp12;Slc23a3;Slc2a1;Slc12a7;Slc22a3;Mup20;Slc4a8;
GO:0071277	43	12	2.01256	5.96254	4.69888e-06	0.000111705	biological_process:cellular response to calcium ion	Acer1;Scn5a;Capn3;Kcnh1;Crhbp;Cpne2;Iqgap1;Nfatc3;Mylk;Syt1;Itpkb;Mef2c;
GO:0030010	28	10	1.31051	7.63063	4.81181e-06	0.000113701	biological_process:establishment of cell polarity	Mark2;Brsk2;Lmna;Ephb1;Myo9b;Brsk1;Wnt7a;Igf1r;Exoc4;Kif26b;
GO:0050804	28	10	1.31051	7.63063	4.81181e-06	0.000113701	biological_process:modulation of chemical synaptic transmission	Tnr;Nlgn3;Gria1;Btbd9;Ppp3ca;Park2;Lrp8;Nlgn2;Ppp1r9b;Cspg5;
GO:0006821	79	16	3.6975	4.32724	4.94747e-06	0.000116555	biological_process:chloride transport	Gabrp;Ano9;Glrb;Clca3a1;Clic6;Gabra5;Fxyd3;Clcn7;Ano1;Ano7;Ano4;Clcn5;Gabrg3;Clic5;Glra3;Glra1;
GO:0042981	189	26	8.84592	2.93921	5.00231e-06	0.000117494	biological_process:regulation of apoptotic process	Cradd;Tgfb2;Card14;Pea15a;Tnfrsf26;Bak1;Actn4;Gli3;Card10;Irak2;Pax2;Fyn;Fas;Hip1;Bmp6;Card11;Phlpp1;Ikzf3;Tnfrsf8;Gls2;Traf2;Card19;Rara;Bmp1;Nlrp1a;Eif2ak2;
GO:0016605	70	15	3.27627	4.57838	5.34571e-06	0.000125185	cellular_component:PML body	Pias1;Wdfy3;Zbtb16;Crebbp;Hipk2;Nr2c1;Calcoco2;Agap3;Mre11a;Blm;Rpa1;Tert;Trim8;Smc6;Mlip;
GO:0031594	61	14	2.85503	4.90362	5.51621e-06	0.000128794	cellular_component:neuromuscular junction	Gria1;Hdac4;Pdzrn3;Thbs4;Musk;Ptn;Rapsn;Prkar1a;Syngr1;Cdh15;Unc13b;Kcnc4;Ank3;Spock1;
GO:0001568	71	15	3.32307	4.5139	6.2065e-06	0.000144481	biological_process:blood vessel development	Col5a1;Tgfb2;Mib1;Antxr1;Ccm2;Chd7;Tgfbr3;Smarca4;Epha2;Lama4;Mdm2;Gatad2a;Ptk2;Crkl;Mef2c;
GO:0000790	217	28	10.1564	2.75687	6.63743e-06	0.000154055	cellular_component:nuclear chromatin	Nacc2;Cbx7;Polr3g;Ldb1;H2afy;Chd4;Plcb1;Nfatc1;Smad4;Setd3;Smarcb1;Ttc21b;Ppard;Smad3;Smarcd3;Smarca2;Setdb1;Fer;Nfatc2;Runx2;Crebbp;Rara;Ncoa1;Mre11a;Smarca4;Smad2;Kat2b;Asxl2;
GO:0016192	205	27	9.59479	2.81403	6.85058e-06	0.000158533	biological_process:vesicle-mediated transport	Uso1;Trappc10;Rab11fip3;Spire2;Bcas3;Ap3b2;Stxbp3;Ap2a2;Ergic1;Rab27a;Arfgap2;Ap1m1;Arf1;Ahi1;Scfd2;Fnbp1;Sec24a;Rab6b;Rab10;Copz1;Tulp1;Myo5b;Ykt6;Arf3;Ap4s1;Gbf1;Copg2;
GO:0005544	45	12	2.10617	5.69754	6.96834e-06	0.000160784	molecular_function:calcium-dependent phospholipid binding	Anxa11;Syt14;Esyt2;Syt7;Anxa3;Syt17;C2cd4c;Anxa2;C2cd4b;Syt2;Anxa13;Syt1;
GO:0005547	37	11	1.73174	6.35198	7.0203e-06	0.000161036	molecular_function:phosphatidylinositol-3,4,5-trisphosphate binding	Fam21;Commd1;Adap1;Gbf1;Ogt;Akt1;Iqgap1;Pard3;Mapkap1;Arap1;Racgap1;
GO:0048701	37	11	1.73174	6.35198	7.0203e-06	0.000161036	biological_process:embryonic cranial skeleton morphogenesis	Pdgfra;Tbx15;Mmp14;Gnas;Nipbl;Dlx2;Smad2;Pax5;Twist2;Runx2;Smad3;
GO:0007283	357	39	16.709	2.33408	7.22474e-06	0.000165242	biological_process:spermatogenesis	Catsperd;Tssk2;Limk2;Dpcd;Taf4b;Smad4;Tdrd12;Phc2;Dazap1;Immp2l;Eif4g3;Gpx4;Kit;Morc1;Ccdc63;Nkd1;Catsper2;Tlk2;Dzip1;Ak7;Adamts2;Ttll5;Adcyap1r1;Ccdc33;Catsperb;Pax5;Tle3;Ankrd49;Racgap1;Ggt1;Cadm1;Rara;Gamt;Prdm9;Ggnbp1;Kdm2b;Mov10l1;Nr2c2;Celf3;
GO:0008328	11	7	0.514842	13.5964	7.39334e-06	0.000168118	cellular_component:ionotropic glutamate receptor complex	Grik5;Shank2;Shank1;Shisa9;Gria1;Dlg2;Dlg4;
GO:0060013	11	7	0.514842	13.5964	7.39334e-06	0.000168118	biological_process:righting reflex	Foxp2;Auts2;Shank1;Glra1;Cdh23;Glrb;Pcdh15;
GO:0005901	82	16	3.83792	4.16893	7.47934e-06	0.000169093	cellular_component:caveola	Cdh13;Scn5a;Kif18a;Igf1r;Lrp8;Mapk1;Lrrk2;Cdh15;Adcyap1r1;Dlc1;Slc27a1;Ptch1;Slc2a1;Gnaq;Insr;Myof;
GO:0016023	82	16	3.83792	4.16893	7.47934e-06	0.000169093	cellular_component:cytoplasmic vesicle	Corin;Slc30a2;Chil3;Ap2a2;Dgkd;Als2cl;Atp7b;Sgk3;Cadps2;Trf;Abl2;Slc39a4;Slc30a7;Cd93;Dst;Myo6;
GO:0071889	23	9	1.07649	8.36052	7.90846e-06	0.000178281	molecular_function:14-3-3 protein binding	Akt1;Prkce;Kif13b;Srpk2;Rptor;Dab2ip;Kcnh1;Ppp1r12a;Tbc1d22a;
GO:0001105	38	11	1.77855	6.18483	8.6849e-06	0.000195224	molecular_function:transcription coactivator activity	Mkl1;Smarca2;Med12l;Tfap2b;Smarca4;Tbx20;Myt1l;Wwox;Mkl2;Crebbp;Hipk2;
GO:0046328	17	8	0.795665	10.0545	8.77329e-06	0.000196647	biological_process:regulation of JNK cascade	Ephb1;Traf2;Phlpp1;Sh3rf1;Igf1r;Map4k4;Ulk4;Rap2a;
GO:0042060	65	14	3.04225	4.60186	1.03418e-05	0.000231143	biological_process:wound healing	Sdc1;Tgfb2;Scrib;Wnt5a;Tpm1;Erbb2;Pdgfra;Celsr1;B4galt1;Slc11a1;Ptk7;Ppard;Nf1;Ppara;
GO:0072661	24	9	1.12329	8.01216	1.044e-05	0.000232675	biological_process:protein localization to plasma membrane	Nkd2;Ptch1;Gas6;Nfasc;Ank3;Anxa2;Pacs2;Kcnb1;Ank1;
GO:0001726	75	15	3.51029	4.27315	1.1015e-05	0.000244796	cellular_component:ruffle	Arhgap1;Myo10;Palld;Cdk6;Kif18a;Gnas;Cobl;Frmd4b;Myo9b;Plcg1;Anxa2;Ezr;Iqgap1;Atp6v1b2;Myo6;
GO:0090090	96	17	4.49317	3.78352	1.21416e-05	0.000268991	biological_process:negative regulation of canonical Wnt signaling pathway	Invs;Ptpro;Wnt5b;Wnt5a;Mllt3;Cyld;Nkd2;Ddit3;Gli3;Dact3;Dkk3;Ror2;Dab2ip;Nkd1;Ankrd6;Park2;Stk3;
GO:0097440	18	8	0.842469	9.4959	1.21723e-05	0.000268991	cellular_component:apical dendrite	Ptk2b;Ppargc1a;Ykt6;Osbp2;Fas;Neurl1a;Rgs12;Myo1d;
GO:0052689	76	15	3.55709	4.21693	1.26427e-05	0.000277635	molecular_function:carboxylic ester hydrolase activity	Ces1b;Lypla1;Acot11;Abhd2;Fam135a;Nlgn3;Nlgn2;Abhd3;Pnliprp2;Ces2g;Ces2h;Nceh1;Ces5a;Fam135b;Acot7;
GO:0051091	107	18	5.00801	3.59424	1.26944e-05	0.000277635	biological_process:positive regulation of DNA-binding transcription factor activity	Trim32;Hdac4;Ppargc1b;Trim27;Ppargc1a;Ppp3ca;Traf2;Pprc1;Kit;Crebbp;Hipk2;Trim14;Anxa3;Akt1;Smarca4;Smarcb1;Trim8;Stk3;
GO:0018024	32	10	1.49772	6.6768	1.2705e-05	0.000277635	molecular_function:histone-lysine N-methyltransferase activity	Setd7;Prdm6;Prdm9;Setdb1;Setd3;Suv39h2;Ehmt1;Smyd3;Kmt2c;Whsc1l1;
GO:0030032	32	10	1.49772	6.6768	1.2705e-05	0.000277635	biological_process:lamellipodium assembly	Vav2;Cdh13;Pxn;Vcl;Ablim3;Ptpro;Kit;Capzb;Vav3;Lrrc16a;
GO:0044325	118	19	5.52285	3.44025	1.28299e-05	0.000279585	molecular_function:ion channel binding	Scn5a;Ppp1r9b;Kcnq1;Lrrk2;Kcnab2;Usp10;Diaph1;Bak1;Ank3;Kcnb1;Actn4;Fgf12;Pacs2;Kcnh1;Pde4d;Fyn;Kcnh5;Cacna1c;Kcnab1;
GO:0007015	77	15	3.6039	4.16216	1.44799e-05	0.000314668	biological_process:actin filament organization	Mtss1;Sorbs3;Ppargc1b;Enah;Ppp1r9b;Sirpa;Diaph1;Pacsin1;Pcdh15;Ptk2b;Trf;Sorbs2;Ctnna1;Abl2;Arf1;
GO:0043198	58	13	2.71462	4.78888	1.46827e-05	0.000318193	cellular_component:dendritic shaft	Stau2;Prex1;Gria1;Cnih3;Grm4;Cacna1b;Exoc4;Kirrel3;Cacna1c;Cnih2;Nlgn2;Asic1;Adrbk2;
GO:0004518	131	20	6.1313	3.26195	1.54122e-05	0.000332167	molecular_function:nuclease activity	Snd1;Mpped2;Drosha;Dnase1l3;Endov;Ang;Zc3h12a;Dclre1c;Eri3;Rnase4;Rida;Zc3h12d;Aen;Gdpd5;Smg6;Exo1;Exosc10;Mre11a;Tsen2;Pan2;
GO:0042787	131	20	6.1313	3.26195	1.54122e-05	0.000332167	biological_process:ubiquitin-dependent protein catabolic process	Trim32;Btbd11;Rnf185;Klhl3;Herc3;Abtb1;Tceb1;Asb2;Rnf165;Btbd9;Wwp2;Rnf43;Rbbp6;Arih2;Mdm2;Gm4858;Gm15800;Park2;Hace1;Abtb2;
GO:0021549	33	10	1.54453	6.47447	1.58886e-05	0.000340563	biological_process:cerebellum development	Nfix;Foxp2;Ptprs;Agtpbp1;Cntn1;Atp2b2;Ldb1;Nr2c2;Faim2;Sdf4;
GO:2001240	33	10	1.54453	6.47447	1.58886e-05	0.000340563	biological_process:negative regulation of extrinsic apoptotic signaling pathway in absence of ligand	Sgk3;Map2k5;Ripk1;Eya3;Fyn;Eya1;Ctnna1;Eya4;Gdnf;Tert;
GO:0000226	78	15	3.6507	4.1088	1.65497e-05	0.000353766	biological_process:microtubule cytoskeleton organization	Crmp1;Eml1;Ulk4;Mark2;Aurka;Mapt;Ss18;Pard3;Fer;Tubgcp2;Map6;Disc1;Tacc2;Tbcd;Ptk2;
GO:0032922	59	13	2.76143	4.70771	1.71826e-05	0.000366298	biological_process:circadian regulation of gene expression	Npas2;Ppp1cc;Zfhx3;Mta1;Ogt;Rbm4b;Hnf1b;Ncoa2;Ppargc1a;Per3;Ppara;Rora;Ngfr;
GO:0048741	26	9	1.2169	7.39584	1.76185e-05	0.00037251	biological_process:skeletal muscle fiber development	Ryr1;Myog;Cacna1s;Ppp3ca;Rcan1;Klhl40;Nfatc3;Fam65b;Dner;
GO:0050772	26	9	1.2169	7.39584	1.76185e-05	0.00037251	biological_process:positive regulation of axonogenesis	Sema4d;Ntrk2;Zeb2;Map2k1;Stk25;Map2k2;Robo1;Nin;Robo2;
GO:0050905	26	9	1.2169	7.39584	1.76185e-05	0.00037251	biological_process:neuromuscular process	Kcnab2;Agtpbp1;Opa3;Scn8a;Cacna1a;Glra1;Fgf12;Aars;Glrb;
GO:0030324	110	18	5.14842	3.49622	1.7664e-05	0.00037251	biological_process:lung development	Foxp2;Stk40;Itga3;Foxp1;Wnt5a;Fgfr1;Adamts2;Lif;Gli2;Fgfr4;Gli3;Pdgfra;Mmp14;Wnt7b;Tab1;Fgf9;Lama5;Smad2;
GO:0018107	42	11	1.96576	5.5958	1.92523e-05	0.000404918	biological_process:peptidyl-threonine phosphorylation	Sbk1;Prkca;Mapk1;Acvr1b;Akt1;Myo3b;Oxsr1;Lrrk2;Hipk2;Dyrk1a;Lmtk2;
GO:0071526	34	10	1.59133	6.28405	1.97343e-05	0.000413946	biological_process:semaphorin-plexin signaling pathway	Crmp1;Sema4f;Plxna1;Farp2;Plxna4;Sema5b;Plxnc1;Sema4g;Sema4d;Sema6a;
GO:0021987	51	12	2.387	5.02724	2.04718e-05	0.00042827	biological_process:cerebral cortex development	Ntrk2;Ptprs;Cdon;Atg7;Mkks;Tacc2;Ccdc85c;Pax5;Mcph1;Nf1;Plcb1;Mllt4;
GO:0019900	90	16	4.21235	3.79836	2.07178e-05	0.000432263	molecular_function:kinase binding	Jakmip3;Ppp1r9b;Nin;Chia1;Prdx3;Ptpn22;Dab2ip;Slc2a1;Nap1l1;Per3;Fas;Dlg2;Park2;Jakmip1;Wwc1;Dlg4;
GO:0012505	70	14	3.27627	4.27315	2.13711e-05	0.000444711	cellular_component:endomembrane system	Grtp1;Wdfy3;Rabgap1l;Nbea;Usp6nl;Adprhl1;Tbc1d9;Tbc1d1;Tbc1d22a;Tbc1d2b;Tbc1d9b;Wdfy4;Arf1;Evi5l;
GO:0004708	20	8	0.936077	8.54631	2.23442e-05	0.00046129	molecular_function:MAP kinase kinase activity	Lrrk2;Adck5;Map2k1;Alpk1;Map2k2;Map2k3;Alpk3;Adrbk2;
GO:0017016	20	8	0.936077	8.54631	2.23442e-05	0.00046129	molecular_function:Ras GTPase binding	Plce1;Dgki;Raf1;Map2k1;Rapgef4;Mapkap1;Rin1;Mllt4;
GO:0060324	20	8	0.936077	8.54631	2.23442e-05	0.00046129	biological_process:face development	Chd7;Mkks;Rara;Raf1;Map2k1;Map2k2;Mapk1;Wnt5a;
GO:0043548	27	9	1.2637	7.12192	2.25549e-05	0.000463202	molecular_function:phosphatidylinositol 3-kinase binding	Pdgfra;Irs3;Ptk2;Igf1r;Insrr;Dab2ip;Insr;Dab1;Fyn;
GO:0044295	27	9	1.2637	7.12192	2.25549e-05	0.000463202	cellular_component:axonal growth cone	Boc;Palld;Ptch1;Mapt;Aatk;Pard3;Shtn1;Nin;Cobl;
GO:0051301	354	37	16.5686	2.23314	2.32994e-05	0.000477243	biological_process:cell division	Prkce;Klhl13;Bre;Zfyve26;Tex14;Rad21;Cntrob;Cdk14;Nek6;Cdc14a;Anapc5;Ttc28;Ist1;Rab11fip4;Cdk6;Mau2;Mad1l1;Papd5;Map9;Anxa11;Katnb1;Cdc23;Brsk2;Rab11fip3;Ccnd3;Cdk20;Aurka;Cables2;Pard3;Ccnk;Incenp;Nedd9;Pard3b;Racgap1;Rcc2;Haus4;Nek4;
GO:0035690	52	12	2.4338	4.93056	2.41685e-05	0.000493754	biological_process:cellular response to drug	Asic2;Crhbp;Rap2a;Ppp1r12a;Pde2a;Kcnq1;Blm;Ppp3ca;Gas6;Mylk;Rnf149;Mef2c;
GO:0001958	28	9	1.31051	6.86757	2.86171e-05	0.00058161	biological_process:endochondral ossification	Bmp6;Mmp14;Col13a1;Nab2;Gnas;Runx2;Cbs;Mef2c;Alpl;
GO:0086010	28	9	1.31051	6.86757	2.86171e-05	0.00058161	biological_process:membrane depolarization during action potential	Cacna1c;Tpcn1;Scn5a;Cacna1s;Scn8a;Cacna1a;Cacna1b;Catsper2;Scn3a;
GO:0009897	303	33	14.1816	2.32696	2.96061e-05	0.000597763	cellular_component:external side of plasma membrane	Cd74;Tgfbr3;Klra7;Cd244;Stab2;Sdc1;Cd22;Glrb;Musk;Scube1;Kit;Klra1;Ngfr;Pdgfra;Ece1;Map3k5;Glra1;Scnn1b;Rtn4rl1;Cd9;Rtn4rl2;Itgb6;B4galt1;Cd276;Fas;Itgb3;Cdh13;Itga3;Vsir;Sema7a;Ano1;Vwf;Ncam1;
GO:0009813	21	8	0.982881	8.13934	2.96405e-05	0.000597763	biological_process:flavonoid biosynthetic process	Ugt1a2;Ugt1a9;Ugt1a1;Ugt1a10;Ugt1a6a;Ugt1a7c;Ugt1a5;Ugt1a6b;
GO:0052696	21	8	0.982881	8.13934	2.96405e-05	0.000597763	biological_process:flavonoid glucuronidation	Ugt1a2;Ugt1a9;Ugt1a1;Ugt1a10;Ugt1a6a;Ugt1a7c;Ugt1a5;Ugt1a6b;
GO:0043154	63	13	2.94864	4.40881	3.13023e-05	0.000629658	biological_process:negative regulation of cysteine-type endopeptidase activity involved in apoptotic process	Mkl1;Wnt9a;Sh3rf1;Map2k5;Naip1;Gpi1;Pax2;Akt1;Mdm2;Gas6;Hgf;Csnk2a1;Ints1;
GO:0030838	45	11	2.10617	5.22274	3.3221e-05	0.000666544	biological_process:positive regulation of actin filament polymerization	Prkce;Ptk2b;Evl;Cdc42ep3;Fmn1;Baiap2l1;Lrrc16a;Nphs1;Fer;Baiap2;Baiap2l2;
GO:0043209	188	24	8.79912	2.72755	3.3649e-05	0.000671475	cellular_component:myelin sheath	Tkt;Gpi1;Exoc4;Myo1d;Mag;Pacsin1;Plcb1;Erbb2;Serinc5;Nfasc;Cntnap1;Ass1;Prdx3;Ywhag;Aco2;Itpr3;Itpr2;Ubc;Cntn1;Gnao1;Ncam1;Ezr;Atp6v1b2;Sptan1;
GO:0033270	15	7	0.702058	9.97069	3.38092e-05	0.000671475	cellular_component:paranode region of axon	Epb41l3;Ank3;Kif13b;Mag;Cntnap1;Sptan1;Nfasc;
GO:0035418	15	7	0.702058	9.97069	3.38092e-05	0.000671475	biological_process:protein localization to synapse	Bsn;Nphs1;Shank1;Klc1;Nlgn2;Dlg4;Asic2;
GO:2001241	15	7	0.702058	9.97069	3.38092e-05	0.000671475	biological_process:positive regulation of extrinsic apoptotic signaling pathway in absence of ligand	Tgfb2;Nf1;Wwox;Ctnna1;Fas;Srpx;Jak3;
GO:0000987	29	9	1.35731	6.63076	3.6005e-05	0.000711484	molecular_function:proximal promoter sequence-specific DNA binding	Myog;Zfp516;Nfatc3;Smad3;Crebbp;Pax2;Smad4;Mef2c;Dmrtc1a;
GO:0032809	29	9	1.35731	6.63076	3.6005e-05	0.000711484	cellular_component:neuronal cell body membrane	Gabra5;Kcnj6;Atp2b2;Dab2ip;Kcnb1;Atp2b1;Rgs8;Ngfr;Slc4a8;
GO:0007018	64	13	2.99545	4.33992	3.61177e-05	0.000711918	biological_process:microtubule-based movement	Kif3c;Dnah17;Dync2h1;Dnah12;Kif18a;Dync1i1;Kif9;Kifc3;Kif13b;Klc1;Kif5c;Dnah8;Kif26b;
GO:0006631	152	21	7.11418	2.95185	3.62669e-05	0.000713068	biological_process:fatty acid metabolic process	Acox2;Hadhb;Hadha;Cryl1;Gpam;Acacb;Acsf3;Cyb5a;Acsl6;Hadh;Lypla1;Acot11;Acsbg1;Them4;Tbxas1;Elovl6;Slc27a1;Elovl7;Fads6;Ppara;Ptgs1;
GO:0005938	106	17	4.96121	3.42659	3.73613e-05	0.000732749	cellular_component:cell cortex	Hmcn2;Spire2;Cobl;Crip2;Fry;Traf2;Map2k2;Pard3;Ptk2b;Itpr2;Myo9b;Map2k1;Lamc2;Eps8;Anxa2;Ryr1;Vmn2r1;
GO:0043588	55	12	2.57421	4.66162	3.89529e-05	0.000762059	biological_process:skin development	Col5a1;Itga3;Bcl11b;Gnas;Nespas;Aars;Adamts2;Ryr1;Tfap2b;Atp8a2;Ngfr;Eda;
GO:0030276	46	11	2.15298	5.10921	3.94988e-05	0.000768904	molecular_function:clathrin binding	Syt14;Syt7;Syt17;Smap1;Tom1l2;Sclt1;Syt2;Lrrk2;Syt11;Syt1;Hip1;
GO:0060291	46	11	2.15298	5.10921	3.94988e-05	0.000768904	biological_process:long-term synaptic potentiation	Ptk2b;Shank2;Ntrk2;Mapk1;Slc24a2;Camk2b;Musk;Tnr;Nlgn3;Crhr1;Itpr3;
GO:0001750	65	13	3.04225	4.27315	4.15662e-05	0.000803169	cellular_component:photoreceptor outer segment	Ahi1;Rapgef4;Prkca;Myo3b;Tulp1;Myo7a;Myrip;Pcdh15;Rab27a;Rp1l1;Shank2;Ptgs1;Plekhb1;
GO:0034976	65	13	3.04225	4.27315	4.15662e-05	0.000803169	biological_process:response to endoplasmic reticulum stress	Tmem259;Scamp5;Fam129a;Tmx1;Srpx;Ddit3;Ptpn1;Erp27;Thbs4;Map3k5;Txndc11;Pla2g6;Park2;
GO:0060271	65	13	3.04225	4.27315	4.15662e-05	0.000803169	biological_process:cilium assembly	Ahi1;Dync2h1;Ulk4;Mkks;Atmin;Ift172;2700049A03Rik;Cc2d2a;Tctn2;Ttc21b;Ift43;Ttc21a;Tctn1;
GO:0044224	10	6	0.468038	12.8195	4.35856e-05	0.00084012	cellular_component:juxtaparanode region of axon	Epb41l3;Kcnab2;Dlg2;Cntnap2;Dlg4;Kcnab1;
GO:0050890	38	10	1.77855	5.62257	4.4148e-05	0.000846799	biological_process:cognition	Chd7;Dgcr2;Gnas;Nipbl;Gtf2a1l;Chl1;Cux2;Nf1;Jakmip1;Dopey2;
GO:0071560	38	10	1.77855	5.62257	4.4148e-05	0.000846799	biological_process:cellular response to transforming growth factor beta stimulus	Dnmt1;Runx1;Col4a2;Fyn;Sox5;Ppargc1a;Pdgfd;Ptk2;Wwox;Mef2c;
GO:0005764	320	34	14.9772	2.27011	4.46661e-05	0.000854648	cellular_component:lysosome	Rab7;Cd74;Ap5s1;Tmem192;Rab27a;Slc11a1;Mpo;Tlr9;Fnbp1;Unc13d;Kcnq1;Pla2g4e;Rptor;Ank3;Rab12;Syt7;Clec16a;Man2b2;March2;3110043O21Rik;Clcn7;Litaf;Cpq;Pax2;Cyb561a3;Tpcn1;Man2b1;Ass1;Tecpr1;Gns;Hyal3;Glb1;Lrrk2;Syt11;
GO:0032281	30	9	1.40412	6.40973	4.49434e-05	0.000857862	cellular_component:AMPA glutamate receptor complex	Shisa6;Cnih2;Gria1;Cnih3;Cacng2;Lrrtm4;Cacng4;Shisa9;Dlg4;
GO:0003707	56	12	2.62101	4.57838	4.53737e-05	0.000863973	molecular_function:steroid hormone receptor activity	Nr2c1;Rara;Esrrb;Nr1h2;Abhd2;Paqr5;Rarb;Nr2c2;Ppard;Thra;Ppara;Rora;
GO:0004653	16	7	0.748861	9.34753	4.67145e-05	0.00088735	molecular_function:polypeptide N-acetylgalactosaminyltransferase activity	Galnt14;Galnt2;Galnt18;Galnt15;Galnt5;Wbscr17;Galnt6;
GO:0007613	76	14	3.55709	3.9358	4.72946e-05	0.000894038	biological_process:memory	Itga3;Musk;Atad1;Glp1r;Plcb1;Asic1;Itpr3;Shank2;Slc24a2;Pla2g6;Kalrn;Rin1;Crhr1;Ptgs1;
GO:0060395	76	14	3.55709	3.9358	4.72946e-05	0.000894038	biological_process:SMAD protein signal transduction	Bmp6;Meg3;Stoml1;Btbd11;Tgfb2;Magi2;Hipk2;Smad4;Ror2;Nceh1;Trf;Smad2;Bmp1;Smad3;
GO:0001889	66	13	3.08905	4.20841	4.77164e-05	0.000899844	biological_process:liver development	Meg3;Cadm1;Cobl;Runx1;Tgfbr3;Vwf;Hnf1b;Atg7;Smarca4;Hgf;Nf1;Mkl2;Smad3;
GO:0005923	109	17	5.10162	3.33228	5.09945e-05	0.000957062	cellular_component:bicellular tight junction	Mpp7;Amotl2;Pard3;Ank3;Adcyap1r1;Tjap1;Magi2;Cldn15;Atp7b;Synpo;Ccdc85c;Tbcd;Cgnl1;Pard3b;Cldn10;Clmp;Magi1;
GO:0009791	109	17	5.10162	3.33228	5.09945e-05	0.000957062	biological_process:post-embryonic development	Foxp2;Meg3;Invs;Gigyf2;Gnas;Chst11;Trp73;Schip1;Itpr1;Kcnj1;Bcl11b;Szt2;Nespas;Atg7;Smad2;Sepp1;Gnaq;
GO:0030198	98	16	4.58678	3.48829	5.16208e-05	0.000966504	biological_process:extracellular matrix organization	Abi3bp;Adamts20;Smoc1;Tgfb2;Tnr;Apbb2;Pdgfra;Col5a3;B4galt1;Col19a1;Olfml2a;Smarca4;Reck;Ptk2;Nf1;Col27a1;
GO:0030315	57	12	2.66782	4.49806	5.26901e-05	0.000984175	cellular_component:T-tubule	Scn5a;Capn3;Igf1r;Adra1b;Ryr1;Ezr;Cacna1c;Bin1;Cacna1s;Atp2b4;Slc9a1;Ank3;
GO:0050680	67	13	3.13586	4.1456	5.46429e-05	0.00101823	biological_process:negative regulation of epithelial cell proliferation	Mtss1;Cdk6;Tgfb2;Rida;Wnt5a;Ptn;Ift172;Ptch1;Tgfbr3;Dab2ip;Lims1;Ppard;Mef2c;
GO:0000184	31	9	1.45092	6.20296	5.56845e-05	0.00103518	biological_process:nuclear-transcribed mRNA catabolic process, nonsense-mediated decay	Smg6;Smg5;Ctif;Rnps1;Dcp2;Gspt1;Exosc10;Casc3;Smg1;
GO:0001822	110	17	5.14842	3.30198	5.64271e-05	0.00104403	biological_process:kidney development	Bmp6;Invs;Fmn1;Myo1e;Tfap2b;Fbn1;Schip1;Gli2;Gli3;Smad4;Kcnj1;Sulf1;Robo2;Pax2;Hnf1b;Glis2;Wdpcp;
GO:0042826	110	17	5.14842	3.30198	5.64271e-05	0.00104403	molecular_function:histone deacetylase binding	Dnmt1;Camta2;Nacc2;Hdac4;Top2a;Ywhab;Runx2;Gli3;Nr2c1;Rara;Dhx36;Hdac9;Nipbl;Kat2b;Smg5;Park2;Mef2c;
GO:0006281	309	33	14.4624	2.28178	5.84792e-05	0.00107946	biological_process:DNA repair	Bre;Ap5s1;Eya1;Zfyve26;Rad21;Neil1;Dclre1c;Blm;Eya4;Emsy;Usp28;Exo1;Fto;Mre11a;Ascc3;Gtf2h2;Fam178a;Trrap;Endov;Smarcb1;Fanci;Fancd2;Fam175a;Rad51b;Usp10;Smg1;Parpbp;Fancl;Eya3;Pole;Rpa1;Smc6;Ap5z1;
GO:0008375	78	14	3.6507	3.83488	6.06155e-05	0.00111626	molecular_function:acetylglucosaminyltransferase activity	Galnt15;Mgat5;Galnt14;Pigz;Gcnt1;Mgat4a;Galntl6;B4galt1;Galnt2;Extl3;Wbscr17;Fut7;Galnt18;Galnt5;
GO:0007219	111	17	5.19523	3.27223	6.23638e-05	0.00114157	biological_process:Notch signaling pathway	Cdk6;Mib1;Mesp2;Ift172;Tbx2;Neurl1a;Cntn6;Cntn1;Aph1c;Maml3;Hnf1b;Sorbs2;Zfp423;Notch3;Dtx2;Dner;Ptp4a3;
GO:0030141	111	17	5.19523	3.27223	6.23638e-05	0.00114157	cellular_component:secretory granule	Fstl4;Tgfb2;Exoc3l;Ap2a2;Syt1;Rab27a;Rab12;Mpo;Ptprn2;Ece1;Crhbp;Pomc;Fas;Rab3b;Zp3;Gars;Baiap2;
GO:0019827	68	13	3.18266	4.08463	6.24262e-05	0.00114157	biological_process:stem cell population maintenance	Tet1;Padi4;Esrrb;Fgfr1;Lif;Lsm1;Nipbl;Eif4enif1;Prdm16;Smarca4;Med28;Prdm14;Trim8;
GO:0031683	24	8	1.12329	7.12192	6.43947e-05	0.00117124	molecular_function:G-protein beta/gamma-subunit complex binding	Gna14;Gna13;Gna12;Gnaq;Gnao1;Gnas;Gna11;Adcy2;
GO:0051966	24	8	1.12329	7.12192	6.43947e-05	0.00117124	biological_process:regulation of synaptic transmission, glutamatergic	Kalrn;Lrrk2;Nlgn3;Grm4;Dgki;Syt1;Disc1;Mef2c;
GO:0008331	11	6	0.514842	11.6541	6.47952e-05	0.00117124	molecular_function:high voltage-gated calcium channel activity	Cacna1c;Cacna1b;Cacna1a;Cacna1s;Cacna1d;Cacnb2;
GO:0015278	11	6	0.514842	11.6541	6.47952e-05	0.00117124	molecular_function:calcium-release channel activity	Rasa3;Ryr1;Ryr2;Itpr1;Itpr2;Itpr3;
GO:0045995	11	6	0.514842	11.6541	6.47952e-05	0.00117124	biological_process:regulation of embryonic development	Lama5;Lama1;Insr;Nipbl;Lama4;Lama2;
GO:0009725	32	9	1.49772	6.00912	6.85091e-05	0.00123269	biological_process:response to hormone	Akt1;Fhl2;Ang;Mmp14;Msi1;Me1;Gclc;Adra1b;Ncoa6;
GO:1900026	32	9	1.49772	6.00912	6.85091e-05	0.00123269	biological_process:positive regulation of substrate adhesion-dependent cell spreading	Crk;Prex1;Itgb3;Unc13d;Lrrc16a;Lims1;Rreb1;Has2;Crkl;
GO:0005546	59	12	2.76143	4.34558	7.04249e-05	0.00126426	molecular_function:phosphatidylinositol-4,5-bisphosphate binding	Syt7;Fam21;Commd1;Anxa2;Kcnq1;Twf2;Tulp1;Pard3;Mapkap1;Syt1;Plcb1;Kcnj1;
GO:0003924	186	23	8.70551	2.642	7.49026e-05	0.00134158	molecular_function:GTPase activity	Rab22a;Rab7;Gna12;Rab27a;Rhoj;Rab3c;Gna13;Agap3;Rab3b;Gspt1;Agap1;Mfn2;Gnas;Gna11;Rab10;Lrrk2;Gtpbp1;Gna14;Gnao1;Rap2a;Eftud2;Rheb;Gnaq;
GO:0002062	41	10	1.91896	5.21116	7.62742e-05	0.00135685	biological_process:chondrocyte differentiation	Col11a2;Runx1;Prkca;Fgfr1;Fgf9;Gli2;Wnt7a;Runx2;Bmpr1b;Mef2c;
GO:0007568	41	10	1.91896	5.21116	7.62742e-05	0.00135685	biological_process:aging	Gnao1;Scp2;Pde4d;Ncam1;Akt1;Msra;Sin3a;Pax5;Adra1d;Atp8a2;
GO:0019894	41	10	1.91896	5.21116	7.62742e-05	0.00135685	molecular_function:kinesin binding	Kif3c;Stau2;Klc3;Plekhm2;Nek6;Shtn1;Lrp8;Disc1;Jakmip1;Crocc;
GO:0050919	25	8	1.1701	6.83705	8.16602e-05	0.00144938	biological_process:negative chemotaxis	Itgb3;Sema4g;Sema4d;Slit1;Sema4f;Slit3;Nrp2;Wnt5a;
GO:0015459	33	9	1.54453	5.82703	8.37283e-05	0.00147939	molecular_function:potassium channel regulator activity	Sgk3;Kcnip4;Kcnab2;Kcnmb2;Kcnab1;Kcnmb3;Pias3;Dpp10;Dpp6;
GO:0019228	33	9	1.54453	5.82703	8.37283e-05	0.00147939	biological_process:neuronal action potential	Scn5a;Gria1;P2rx3;Kcnmb2;Kcnmb3;Ank3;Scn8a;Dpp6;Scn3a;
GO:0019001	18	7	0.842469	8.30891	8.46332e-05	0.00148534	molecular_function:guanyl nucleotide binding	Gna14;Gna13;Gna12;Gnaq;Gnao1;Gnas;Gna11;
GO:0051393	18	7	0.842469	8.30891	8.46332e-05	0.00148534	molecular_function:alpha-actinin binding	Pdlim2;Nphs1;Cacna1c;Ptprt;Rara;Cacna1d;Magi1;
GO:1990841	18	7	0.842469	8.30891	8.46332e-05	0.00148534	molecular_function:promoter-specific chromatin binding	Dnmt1;Chd7;Runx1;Ppargc1a;Rbl2;Setdb1;Rbl1;
GO:0004222	103	16	4.8208	3.31895	8.71634e-05	0.00152633	molecular_function:metalloendopeptidase activity	Adamts20;Tll1;Spg7;Adamts2;Mep1b;Mep1a;Adam1a;Mmp14;Papln;Ece1;Nln;Thsd4;Bmp1;Adamts18;Adamts12;Adam22;
GO:0016604	42	10	1.96576	5.08709	9.06487e-05	0.00158031	cellular_component:nuclear body	Zfhx3;Zkscan17;Gemin5;Bcl11a;Sumo3;Mdm2;Zbtb16;Ptk2;Crebbp;Hipk2;
GO:0030374	42	10	1.96576	5.08709	9.06487e-05	0.00158031	molecular_function:nuclear receptor transcription coactivator activity	Ccdc62;Ppargc1b;Ncoa1;Ncoa2;Ppargc1a;Pprc1;Ncoa7;Ss18;Actn4;Ncoa6;
GO:0070373	61	12	2.85503	4.2031	9.30783e-05	0.00160498	biological_process:negative regulation of ERK1 and ERK2 cascade	Ndrg2;Gstp1;Ptprr;Ptpn1;Dab2ip;Ace2;Ezr;Lif;Tnip1;Wnk2;Csk;Smad4;
GO:0017166	12	6	0.561646	10.6829	9.34962e-05	0.00160498	molecular_function:vinculin binding	Sorbs3;Synm;Ctnna1;Dlc1;Nrap;Pxn;
GO:0030159	12	6	0.561646	10.6829	9.34962e-05	0.00160498	molecular_function:receptor signaling complex scaffold activity	Lrrk2;Shank1;Akap12;Grip1;Pxn;Magi2;
GO:0031235	12	6	0.561646	10.6829	9.34962e-05	0.00160498	cellular_component:intrinsic component of the cytoplasmic side of the plasma membrane	Rasa3;Rasal3;Rasal2;Rasal1;Nf1;Dab2ip;
GO:0043666	12	6	0.561646	10.6829	9.34962e-05	0.00160498	biological_process:regulation of phosphoprotein phosphatase activity	Rcan1;Ppp6r1;Ppp6r2;Vcan;Ppp6r3;Ptpa;
GO:0070182	12	6	0.561646	10.6829	9.34962e-05	0.00160498	molecular_function:DNA polymerase binding	Ncoa2;Fanci;Smarca4;Smg6;Fancd2;Smg5;
GO:0071564	12	6	0.561646	10.6829	9.34962e-05	0.00160498	cellular_component:npBAF complex	Phf10;Ss18;Smarca4;Smarcb1;Smarcd3;Smarca2;
GO:0043679	82	14	3.83792	3.64781	9.73418e-05	0.00166735	cellular_component:axon terminus	Atp6v0d1;Kcnk2;Amph;Kcnab2;Dgki;Tulp1;Sncg;Pacsin1;Ntrk2;Tanc1;Cacna1b;Crhbp;Bin1;Kcnc4;
GO:0006469	93	15	4.35276	3.44609	9.85239e-05	0.00168392	biological_process:negative regulation of protein kinase activity	Dbndd2;Lrrtm4;Prkca;Podn;Trim27;Smyd3;Prkar1a;Rtn4rl1;Rtn4rl2;Akt1;Gp1ba;Gnaq;Nf1;Deptor;Lrrc15;
GO:0035264	116	17	5.42924	3.13119	0.000101079	0.00172384	biological_process:multicellular organism growth	Stk40;Meg3;Gigyf2;Sos1;Rarb;Gnas;Tnks2;Ccm2;Pcdh15;Rara;Rbbp6;Ttc8;Apba2;Nespas;Slco1a6;Pde4d;Kmt2c;
GO:2000463	26	8	1.2169	6.57408	0.000102592	0.00174585	biological_process:positive regulation of excitatory postsynaptic potential	Ptk2b;Nlgn3;Wnt7a;Cux2;Shank1;Nlgn2;Dlg4;Ngfr;
GO:0005871	52	11	2.4338	4.51968	0.000102916	0.00174756	cellular_component:kinesin complex	Kif3c;Klc3;Kifc1;Kif18a;Kif9;Disc1;Kifc3;Kif13b;Klc1;Kif5c;Kif26b;
GO:0007179	72	13	3.36988	3.85771	0.00010397	0.00176166	biological_process:transforming growth factor beta receptor signaling pathway	Ltbp4;Pxn;Tgfb2;Itgb5;Hipk2;Smad4;Tgfbr3;Tab1;Smad2;Gdnf;Ptk2;Smad3;Bmpr1b;
GO:0036064	105	16	4.9144	3.25574	0.000106504	0.0017981	cellular_component:ciliary basal body	Ahi1;Agbl4;Dzip1;Wdr34;Bbs9;Mkks;Ick;Cyld;Ift172;Evc;2700049A03Rik;Dync2li1;Ttc8;Disc1;Akt1;Ezr;
GO:0014068	62	12	2.90184	4.13531	0.000106579	0.0017981	biological_process:positive regulation of phosphatidylinositol 3-kinase signaling	Rara;Ntrk2;Flt1;Igf1r;Tgfb2;Fyn;Sema4d;Pdgfd;Hgf;Ppard;Ptk2;Erbb2;
GO:0045184	43	10	2.01256	4.96878	0.000107252	0.00180557	biological_process:establishment of protein localization	Dzip1;Rap2a;Lims1;Smyd3;Wdpcp;Mdm2;Ank3;Ist1;Rcc2;Dlg4;
GO:0005513	7	5	0.327627	15.2613	0.00010902	0.00182749	biological_process:detection of calcium ion	Stim1;Kcnmb2;Kcnmb3;Ryr2;Syt1;
GO:0007215	7	5	0.327627	15.2613	0.00010902	0.00182749	biological_process:glutamate receptor signaling pathway	Grik3;Plcb1;Gnaq;Gna11;Kcnb1;
GO:0001843	94	15	4.39956	3.40943	0.000109536	0.00183222	biological_process:neural tube closure	Enah;Scrib;Wnt5a;Cobl;Zeb2;Ift172;Dlc1;Celsr1;Rara;Ptch1;Ptk7;Pax2;Cc2d2a;Trim71;Mthfd1;
GO:0008157	19	7	0.889273	7.8716	0.000111329	0.00184647	molecular_function:protein phosphatase 1 binding	Sh3rf2;Ppp1cc;Lmna;Fer;Phactr3;Ppp1r9b;Kcnq1;
GO:0030673	19	7	0.889273	7.8716	0.000111329	0.00184647	cellular_component:axolemma	Epb41l3;Kcnh1;Robo1;Cntnap2;Robo2;Ank1;Myo1d;
GO:0031290	19	7	0.889273	7.8716	0.000111329	0.00184647	biological_process:retinal ganglion cell axon guidance	Slit1;Ephb1;Sema4f;Efna5;Robo2;Bmpr1b;Ephb2;
GO:0031489	19	7	0.889273	7.8716	0.000111329	0.00184647	molecular_function:myosin V binding	Gria1;Rab3c;Rab25;Rab3b;Rab6b;Rab10;Rab27a;
GO:0000976	53	11	2.4806	4.43441	0.000119259	0.00196966	molecular_function:transcription regulatory region sequence-specific DNA binding	Tbx15;Mkl1;Suv39h2;Sin3a;Zfp148;Park2;Thra;Nfatc2;Tnrc18;Btbd8;Ddit3;
GO:0043401	53	11	2.4806	4.43441	0.000119259	0.00196966	biological_process:steroid hormone mediated signaling pathway	Nr2c1;Rara;Esrrb;Nr1h2;Abhd2;Rarb;Nr2c2;Ppard;Thra;Ppara;Rora;
GO:0016746	167	21	7.81624	2.68671	0.000121302	0.00199918	molecular_function:transferase activity, transferring acyl groups	Tgm2;Lpgat1;Scp2;Hadhb;Tgm5;Hhat;Mboat2;Gpam;Zdhhc8;Nat6;Mogat2;Ggt1;Elp3;Ate1;Crebbp;Pnpla3;Ncoa1;Kmt2c;Kat2b;Zdhhc14;Zdhhc17;
GO:0035091	84	14	3.93152	3.56096	0.00012205	0.0020073	molecular_function:phosphatidylinositol binding	Nisch;Myo1e;Tulp1;Itpr1;Fes;Itpr3;Sbf2;Sgk3;Esyt2;Itpr2;Sh3pxd2a;Mcf2l;Ncf1;Hip1;
GO:0048008	35	9	1.63813	5.49406	0.000122759	0.00201474	biological_process:platelet-derived growth factor receptor signaling pathway	Ptprj;Pdgfra;Itgb3;Myo1e;Schip1;Abl2;Pdgfd;Iqgap1;Fer;
GO:0007166	218	25	10.2032	2.4502	0.000125988	0.00206084	biological_process:cell surface receptor signaling pathway	Adgra1;Lama1;Celsr3;Cd9;Adcyap1r1;Erbb2;Adgrg1;Celsr1;Fyn;Tspan14;Cd22;Cd247;Pik3cd;Glp1r;Ptk2b;Adgrb1;Tspan11;Acvr1b;Adgrf1;Ncam1;Adgrb2;Sema6a;Itpkb;Crhr1;Tspan9;
GO:0035176	44	10	2.05937	4.85586	0.000126356	0.00206084	biological_process:social behavior	Shank2;Cntnap2;Mkks;Kalrn;Nlgn3;Grid1;Shank1;Nrxn2;Nlgn2;Dlg4;
GO:0072686	44	10	2.05937	4.85586	0.000126356	0.00206084	cellular_component:mitotic spindle	Map9;Pkp4;Mad1l1;Kifc1;Cdc14a;Eml2;Aurka;Diaph1;Ttc28;Racgap1;
GO:0007269	27	8	1.2637	6.3306	0.000127769	0.00207526	biological_process:neurotransmitter secretion	Syt2;Dgki;Ptprn2;Brsk1;Wnt7a;Syt1;Cacna1b;Nrxn2;
GO:0035255	27	8	1.2637	6.3306	0.000127769	0.00207526	molecular_function:ionotropic glutamate receptor binding	Rapsn;Shank2;Dlg2;Cacng2;Shank1;Gnas;Myo5b;Dlg4;
GO:0060088	13	6	0.60845	9.86112	0.000131456	0.00212633	biological_process:auditory receptor cell stereocilium organization	Myo7a;Atp2b2;Clic5;Scrib;Cdh23;Pcdh15;
GO:0071625	13	6	0.60845	9.86112	0.000131456	0.00212633	biological_process:vocalization behavior	Shank2;Shank1;Nrxn2;Nlgn3;Cntnap2;Dlg4;
GO:0034613	54	11	2.52741	4.35229	0.000137761	0.00222374	biological_process:cellular protein localization	Ahi1;Padi6;Nipbl;Wnt5a;Disc1;Rap2a;Sin3a;Eya1;Lrrk2;Ctnna1;Abl2;
GO:0022008	64	12	2.99545	4.00608	0.000138681	0.00222485	biological_process:neurogenesis	Prdm6;Ephb1;Dagla;Rarb;Wnt5a;Spock1;Cntn6;Nup133;Bcl11a;Tacc2;Prdm16;Smarca4;
GO:0032436	64	12	2.99545	4.00608	0.000138681	0.00222485	biological_process:positive regulation of proteasomal ubiquitin-dependent protein catabolic process	Pias1;Cbfa2t3;Nkd2;Lrrk2;Aurka;Gclc;Rnf180;Akt1;Atg7;Arih2;Mdm2;Park2;
GO:0048146	64	12	2.99545	4.00608	0.000138681	0.00222485	biological_process:positive regulation of fibroblast proliferation	Itgb3;Cd74;Cdk6;Wnt5a;Ngfr;Pdgfra;Egf;Anxa2;Kmt2c;Pdgfd;Gas6;Zmiz1;
GO:0017048	36	9	1.68494	5.34144	0.000147361	0.00234957	molecular_function:Rho GTPase binding	Cdc42bpb;Vcl;Myo9b;Srgap1;Dock9;Lrrk2;Diaph1;Iqgap1;Inf2;
GO:0043914	36	9	1.68494	5.34144	0.000147361	0.00234957	molecular_function:NADPH:sulfur oxidoreductase activity	Mical2;Cryzl1;Aifm2;Enox1;Pyroxd2;Vat1l;Gfod1;Noxred1;Cyb561a3;
GO:0060173	36	9	1.68494	5.34144	0.000147361	0.00234957	biological_process:limb development	Chd7;Rara;Fmn1;Smoc1;Rnf165;Ift172;Wnt7a;Zak;Gli3;
GO:0015631	45	10	2.10617	4.74795	0.000148252	0.00234957	molecular_function:tubulin binding	Agbl4;Agtpbp1;Eml1;Eml2;Fyn;Agbl1;Lrrk2;Klc1;Mapt;Park2;
GO:0016298	45	10	2.10617	4.74795	0.000148252	0.00234957	molecular_function:lipase activity	Ces1b;Lypla1;Pnliprp2;Ces2g;Pnpla5;Nceh1;Ces2h;Plb1;Dagla;Ddhd1;
GO:0034707	45	10	2.10617	4.74795	0.000148252	0.00234957	cellular_component:chloride channel complex	Gabrp;Glrb;Clic6;Gabra5;Fxyd3;Gabrg3;Glra3;Clic5;Ano1;Glra1;
GO:0048661	75	13	3.51029	3.7034	0.0001491	0.00235825	biological_process:positive regulation of smooth muscle cell proliferation	Itgb3;Cdh13;Tgm2;Hdac4;Igf1r;Prkca;Ppargc1a;Abcc4;Orc1;Pdgfd;Notch3;Gnaq;Ptk2;
GO:0046983	189	23	8.84592	2.60007	0.000151135	0.00238562	molecular_function:protein dimerization activity	Npas2;Tfeb;Tfap2b;Mesp2;Twist2;Celsr1;Mlxip;Mxi1;Ano7;Ncoa2;Thra;Mef2c;Npas3;Ppp3ca;Ano1;Figla;Kif9;Ncoa1;Slc24a2;Ano4;Myog;Arnt2;Gars;
GO:0030307	86	14	4.02513	3.47815	0.000152011	0.00238984	biological_process:positive regulation of cell growth	Trim32;Tgfb2;Map2k5;Erbb2;Ptk2b;Mmp14;Hdgfrp2;Extl3;Adnp2;Kdm2b;Akt1;Slc9a1;Csnk2a1;Ptk2;
GO:0051291	86	14	4.02513	3.47815	0.000152011	0.00238984	biological_process:protein heterooligomerization	Igf1r;Glrb;Kcnab2;Stxbp3;Traf2;Ywhab;Ppp5c;Magi2;Itpr3;Map2k1;Ripk1;Lims1;Ctnna1;Glra1;
GO:0016758	28	8	1.31051	6.10451	0.000157831	0.00247142	molecular_function:transferase activity, transferring hexosyl groups	Ugt1a2;Alg8;Ugt1a9;Ugt1a1;Gbgt1;Ugt1a6a;Ugt1a7c;Mgat4a;
GO:0021522	28	8	1.31051	6.10451	0.000157831	0.00247142	biological_process:spinal cord motor neuron differentiation	Dync2h1;Gdpd5;Gigyf2;Ptch1;Gli2;Ift172;Cacna1a;Gli3;
GO:0045785	55	11	2.57421	4.27315	0.000158647	0.00247925	biological_process:positive regulation of cell adhesion	Ptprj;Prex1;Tgm2;Prkca;Vav3;Skap1;Ldb1;Tpm1;Ptk2;Erbb2;Adgrg1;
GO:0031965	158	20	7.39501	2.70453	0.000160177	0.00249818	cellular_component:nuclear membrane	Syne2;Trim27;Osbpl6;Tnrc18;Adra1b;Dtx2;Myo6;Stau2;Sun1;Phlpp1;Mrps23;Phf20;Lmna;Nup35;Syne1;Aen;Nup133;Nup98;Mcm3ap;Dgkh;
GO:0050731	98	15	4.58678	3.27027	0.000165007	0.00256841	biological_process:positive regulation of peptidyl-tyrosine phosphorylation	Itgb3;Cd74;Lrp8;Musk;Lif;Lrrk1;Cspg4;Pdgfra;Ptk2b;Egf;Cntn1;Thbs4;Sema4d;Hgf;Efna5;
GO:0008093	8	5	0.374431	13.3536	0.000170598	0.00264495	molecular_function:cytoskeletal adaptor activity	Baiap2;Baiap2l1;Ank3;Ank1;Baiap2l2;
GO:0010591	8	5	0.374431	13.3536	0.000170598	0.00264495	biological_process:regulation of lamellipodium assembly	Ssh1;Epha2;Ssh2;Capzb;Fer;
GO:0001657	46	10	2.15298	4.64473	0.000173259	0.00267037	biological_process:ureteric bud development	Rara;Rarb;Vcan;Robo2;Pax2;Fgfr1;Eya1;Smad2;Gdnf;Smad3;
GO:0016407	46	10	2.15298	4.64473	0.000173259	0.00267037	molecular_function:acetyltransferase activity	Naa15;Ykt6;Lpgat1;Pnpla3;Nat6;Kat2b;Hhat;Mogat2;Mboat2;Crebbp;
GO:0071300	46	10	2.15298	4.64473	0.000173259	0.00267037	biological_process:cellular response to retinoic acid	Rara;Ptk2b;Adnp2;Ptk7;Ogt;Pax2;Brinp2;Twf2;Abl2;Mef2c;
GO:0009966	37	9	1.73174	5.19708	0.000175941	0.00269581	biological_process:regulation of signal transduction	Runx1;Cdc42se2;Ptpn1;Afap1l2;Naip1;Acvr1b;Spred2;Naip5;Vwce;
GO:0010508	37	9	1.73174	5.19708	0.000175941	0.00269581	biological_process:positive regulation of autophagy	Tfeb;Zc3h12a;Tlr9;Atg7;Tpcn1;Trim65;Lrrk2;Ulk1;Trim8;
GO:0048487	37	9	1.73174	5.19708	0.000175941	0.00269581	molecular_function:beta-tubulin binding	Tbca;Capzb;Bcas3;Pex14;Tbcd;Syt11;Sncg;Slc6a2;Racgap1;
GO:0005249	66	12	3.08905	3.88469	0.000178716	0.0027256	molecular_function:voltage-gated potassium channel activity	Kcnk2;Kcnt1;Kcnq5;Kcnq1;Kcnab2;Kcnb1;Kcnq2;Kcnh1;Kcnh5;Kcnq4;Kcnab1;Kcnc4;
GO:0090263	66	12	3.08905	3.88469	0.000178716	0.0027256	biological_process:positive regulation of canonical Wnt signaling pathway	Lgr5;Tnks2;Usp34;Lrrk2;Rspo1;Lrrk1;Wnt7a;Ror2;Rnf220;Fgf9;Thra;Eda;
GO:0021702	14	6	0.655254	9.15675	0.000180664	0.0027256	biological_process:cerebellar Purkinje cell differentiation	Agtpbp1;Atp2b2;Ldb1;Cacna1a;Faim2;Rora;
GO:0031643	14	6	0.655254	9.15675	0.000180664	0.0027256	biological_process:positive regulation of myelination	Hgf;Trf;Pard3;Mag;Tenm4;Ngfr;
GO:0034968	14	6	0.655254	9.15675	0.000180664	0.0027256	biological_process:histone lysine methylation	Prdm9;Ehmt1;Setd7;Smyd3;Setdb1;Suv39h2;
GO:0060997	14	6	0.655254	9.15675	0.000180664	0.0027256	biological_process:dendritic spine morphogenesis	Wnt7a;Shank1;Ctnnd2;Dlg4;Ephb1;Ephb2;
GO:0061053	14	6	0.655254	9.15675	0.000180664	0.0027256	biological_process:somite development	Mthfd1;Nup133;Rad51b;Wnt5a;Ptch1;Rbbp6;
GO:0071565	14	6	0.655254	9.15675	0.000180664	0.0027256	cellular_component:nBAF complex	Smarca4;Dpf3;Smarcb1;Smarcd3;Arid1b;Smarca2;
GO:0005080	56	11	2.62101	4.19685	0.000182158	0.00274286	molecular_function:protein kinase C binding	Dact3;Ugt1a9;Ugt1a10;Hdac9;Top2a;Akt1;Pea15a;Twf2;Pard3;Ywhag;Nell2;
GO:0019226	21	7	0.982881	7.12192	0.000185191	0.00277256	biological_process:transmission of nerve impulse	Kcnq2;Chrm5;Cacng2;Otoa;Nfasc;Cacng4;Cacna1a;
GO:0032839	21	7	0.982881	7.12192	0.000185191	0.00277256	cellular_component:dendrite cytoplasm	Lrrk2;Kcnab1;Map2k1;Camk2a;Grik3;Mapk1;Dlg4;
GO:1900182	21	7	0.982881	7.12192	0.000185191	0.00277256	biological_process:positive regulation of protein localization to nucleus	Akt1;Glis2;Lif;Trim8;Tgfb2;Ogt;Fyn;
GO:0006338	77	13	3.6039	3.60721	0.000187771	0.0028005	biological_process:chromatin remodeling	Padi4;Chrac1;Smarcd3;Smarca2;Hdac4;Arid1b;Pax7;Chd7;Suv39h2;Smarca4;Kat2b;Smarcb1;Baz2a;
GO:0007030	77	13	3.6039	3.60721	0.000187771	0.0028005	biological_process:Golgi organization	Uso1;Dync2h1;Myo18a;Bcas3;Kifc3;Lrrk2;Usp6nl;Syne1;Tjap1;Plekhm2;Gbf1;Atp8b4;Hace1;
GO:0015020	29	8	1.35731	5.89401	0.000193476	0.00286922	molecular_function:glucuronosyltransferase activity	Ugt1a2;Ugt1a9;Ugt1a1;Ugt1a10;Ugt1a6a;Ugt1a7c;Ugt1a5;Ugt1a6b;
GO:0046875	29	8	1.35731	5.89401	0.000193476	0.00286922	molecular_function:ephrin receptor binding	Anks1;Crk;Ptpn1;Sipa1l1;Ngef;Efnb3;Efna5;Fyn;
GO:0090004	29	8	1.35731	5.89401	0.000193476	0.00286922	biological_process:positive regulation of protein localization to plasma membrane	Akt1;Ezr;Nkd2;Epha2;Itga3;Dpp10;Ppp1r9b;Dpp6;
GO:0005178	100	15	4.68038	3.20486	0.000200893	0.00297359	molecular_function:integrin binding	Itgb3;Pxn;Itga3;Nisch;Fbn1;Tnr;Sema7a;Itgb5;Cd9;Itgb6;Mmp14;Vwf;Thbs4;Lama5;Ptk2;
GO:0032956	47	10	2.19978	4.54591	0.000201719	0.00297459	biological_process:regulation of actin cytoskeleton organization	Stau2;Crk;Itgb3;Celsr1;Tgfb2;Gpm6b;Twf2;Dlc1;Baiap2;Efna5;
GO:0051592	47	10	2.19978	4.54591	0.000201719	0.00297459	biological_process:response to calcium ion	Ryr2;Ttn;Anxa11;Pde1c;Capn3;Slc25a13;Ppp3ca;Syt1;Pcdh15;Itpr3;
GO:0004386	124	17	5.80368	2.92918	0.000207084	0.00304228	molecular_function:helicase activity	Ddx10;Smarca2;Helq;Chd9;Chd4;Chd7;Mcm6;Dhx36;Mov10l1;Tdrd12;Blm;Ascc3;Smarca4;Dhx33;Ythdc2;Mcm2;Ddx39b;
GO:0043123	124	17	5.80368	2.92918	0.000207084	0.00304228	biological_process:positive regulation of I-kappaB kinase/NF-kappaB signaling	Prkce;Card11;Trim32;Tgm2;Ube2v1;Traf2;Ppp5c;Litaf;Nek6;Tlr9;Ripk1;Fyn;Abl2;Zdhhc17;Park2;Trim8;Eda;
GO:0045860	57	11	2.66782	4.12322	0.000208555	0.00305026	biological_process:positive regulation of protein kinase activity	Ptk2b;Pxn;Lrp8;Map2k3;Wnt5a;Camkk1;Zp3;Gas6;Iqgap1;Ptk2;Dab1;
GO:0001503	89	14	4.16554	3.36091	0.000208794	0.00305026	biological_process:ossification	Col11a2;Bmp6;Ppargc1b;Gpm6b;Ptn;Runx1;Mmp14;Chrdl2;Dhx36;Myog;Col13a1;Bmp1;Thra;Atp6v0a4;
GO:0060070	89	14	4.16554	3.36091	0.000208794	0.00305026	biological_process:canonical Wnt signaling pathway	Sdc1;Ryr2;Bcl9l;Wnt9a;Wnt5a;Rspo1;Wnt7a;Mgat3;Wnt7b;Egf;Ptk7;Disc1;Ptpru;Smad3;
GO:0060548	78	13	3.6507	3.56096	0.000210133	0.00306412	biological_process:negative regulation of cell death	Itgb3;Npas2;Ntrk3;Wnt9a;Ogt;Adcyap1r1;Ppp5c;Smad4;Cabin1;Adnp2;Ncam1;Atg7;Park2;
GO:0005694	340	33	15.9133	2.07374	0.000231618	0.00337113	cellular_component:chromosome	Tnks2;Tex14;Rad21;Neil1;Tert;Mbd5;Mad1l1;Whsc1l1;Setd7;Rbbp6;Mre11a;Ehmt1;Rsph1;Eed;H2afy;Incenp;Kansl1;Hjurp;Hmgb4;Rbm19;Dync1i1;Nol6;Setdb1;Rcc2;Ppp2r5c;Nup133;Aurkc;Smg6;Prdm9;Pphln1;Dhx36;Suv39h2;Smc6;
GO:0071363	48	10	2.24658	4.4512	0.000233999	0.00338944	biological_process:cellular response to growth factor stimulus	Mir338;Map2k5;Ripk1;Akt1;Myog;Twf2;Gas6;Insr;Erbb2;Bmpr1b;
GO:0045862	22	7	1.02968	6.7982	0.000234684	0.00338944	biological_process:positive regulation of proteolysis	Cyfip2;Trim32;Bak1;Capn3;Fgfr4;Ist1;Ogt;
GO:0051018	22	7	1.02968	6.7982	0.000234684	0.00338944	molecular_function:protein kinase A binding	Dact3;Rara;Lrrk2;Akap12;Gria1;Nbea;Myrip;
GO:0019933	30	8	1.40412	5.69754	0.000235468	0.00338944	biological_process:cAMP-mediated signaling	Ksr1;Glp1r;Adcy7;Adcy8;Rapgef4;Adcyap1r1;Pde2a;Adcy2;
GO:0045880	30	8	1.40412	5.69754	0.000235468	0.00338944	biological_process:positive regulation of smoothened signaling pathway	Fgf9;Ctnna1;Dync2h1;Wnt9a;Scube1;Ift172;Dcdc2a;Evc;
GO:0048015	30	8	1.40412	5.69754	0.000235468	0.00338944	biological_process:phosphatidylinositol-mediated signaling	Pi4ka;Ezr;Pdgfra;Pik3cd;Zp3;Igf1r;Ncs1;Ogt;
GO:0016337	102	15	4.77399	3.14202	0.000243334	0.00345829	biological_process:cell-cell adhesion	Cdon;Scrib;Ctnnd2;Nectin4;Negr1;Pard3;Pkp4;Cyfip2;Boc;Itgb2;Ctnna3;Ptpru;Lims1;Arvcf;Cd93;
GO:0045666	102	15	4.77399	3.14202	0.000243334	0.00345829	biological_process:positive regulation of neuron differentiation	Bmp6;Zeb1;Trim32;Cdon;Rarb;Fgfr1;Gli2;Ngfr;Rara;Gdpd5;Rgs6;Ncoa1;Brinp2;Dab1;Mef2c;
GO:0021680	15	6	0.702058	8.5463	0.000243337	0.00345829	biological_process:cerebellar Purkinje cell layer development	Agtpbp1;Nfix;Atg7;Cacna1a;Faim2;Aars;
GO:0034236	15	6	0.702058	8.5463	0.000243337	0.00345829	molecular_function:protein kinase A catalytic subunit binding	Ezr;Ryr2;Prkar1a;Csk;Prkar1b;Kcnq1;
GO:0035136	15	6	0.702058	8.5463	0.000243337	0.00345829	biological_process:forelimb morphogenesis	Fmn1;Wnt7a;Tfap2b;Rnf165;Nipbl;Zbtb16;
GO:1901379	15	6	0.702058	8.5463	0.000243337	0.00345829	biological_process:regulation of potassium ion transmembrane transport	Kcnab2;Dpp10;Cacna1d;Kcnip4;Dpp6;Kcnab1;
GO:2000251	15	6	0.702058	8.5463	0.000243337	0.00345829	biological_process:positive regulation of actin cytoskeleton reorganization	Baiap2l1;Ntrk3;Baiap2;Fes;Bcas3;Baiap2l2;
GO:0031623	39	9	1.82535	4.93056	0.000247027	0.00350438	biological_process:receptor internalization	Ackr3;Gria1;Itgb2;Ramp1;Ezr;Rab31;Ulk1;Cd9;Adrbk2;
GO:0051260	185	22	8.65871	2.54079	0.000248601	0.00352035	biological_process:protein homooligomerization	Nacc2;Tgm2;Entpd2;P2rx3;Fas;Kcnc4;Slc6a1;Kctd8;Scube1;Dgkd;Kcnb1;Itpr3;Kctd5;Ripk1;Vwf;Thbs4;C1qtnf7;Pex14;Sftpc;Glra3;Kctd1;Glra1;
GO:0033173	9	5	0.421235	11.8699	0.000255561	0.00359296	biological_process:calcineurin-NFAT signaling cascade	Rcan1;Nfatc3;Nfatc2;Nfatc1;Ppp3ca;
GO:0036156	9	5	0.421235	11.8699	0.000255561	0.00359296	cellular_component:inner dynein arm	Dnah7a;Dnah1;Dnah7c;Dnah10;Dnah12;
GO:0071361	9	5	0.421235	11.8699	0.000255561	0.00359296	biological_process:cellular response to ethanol	Glra3;Prkce;Glra1;Itpr2;Adcy7;
GO:1900165	9	5	0.421235	11.8699	0.000255561	0.00359296	biological_process:negative regulation of interleukin-6 secretion	Cd84;Zc3h12a;Gas6;Syt11;Ptpn22;
GO:0032869	69	12	3.22946	3.71579	0.000257046	0.00360739	biological_process:cellular response to insulin stimulus	Igf1r;Rab10;Rab31;Ywhag;Fer;Gpam;Hdac9;Akt1;Kat2b;Slc9a1;Cpeb1;Insr;
GO:0030097	80	13	3.74431	3.47194	0.000261763	0.00366702	biological_process:hemopoiesis	Cdk6;Tgfb2;Myo1e;Crip2;Txnrd2;Zbtb16;Kit;Runx1;Pknox1;Ttc7;Kirrel3;Gfi1b;Rpa1;
GO:0001755	49	10	2.29339	4.36036	0.000270496	0.00377588	biological_process:neural crest cell migration	Sema4f;Nrp2;Sema5b;Sema4g;Lama5;Sema4d;Gdnf;Zeb2;Sema7a;Sema6a;
GO:0007189	49	10	2.29339	4.36036	0.000270496	0.00377588	biological_process:adenylate cyclase-activating G protein-coupled receptor signaling pathway	Rxfp2;Adcy7;Gna13;Gnas;Glp1r;Adcy8;Gnaq;Tshr;Crhr1;Adcy2;
GO:0001540	31	8	1.45092	5.51375	0.000284636	0.00395215	molecular_function:amyloid-beta binding	Apbb2;Sorl1;Cd74;Col25a1;Tgfb2;Apba2;Ldlrad3;Ngfr;
GO:0004709	31	8	1.45092	5.51375	0.000284636	0.00395215	molecular_function:MAP kinase kinase kinase activity	Map3k13;Raf1;Adck5;Alpk1;Alpk3;Zak;Map3k5;Adrbk2;
GO:0004864	31	8	1.45092	5.51375	0.000284636	0.00395215	molecular_function:protein phosphatase inhibitor activity	Ppp1r37;Cabin1;Sh3rf2;Ppp1r14d;Elfn1;Phactr3;Ppp1r9b;Lmtk2;
GO:0005902	70	12	3.27627	3.6627	0.000288914	0.00398744	cellular_component:microvillus	Muc3;Exoc4;Lrrk2;Myo7a;Erbb2;Pdgfra;Ezr;Kif13b;Atp6v1b2;Dcxr;Wwox;Myo6;
GO:0007173	40	9	1.87215	4.8073	0.000290628	0.00398744	biological_process:epidermal growth factor receptor signaling pathway	Ptk2b;Egf;Plcg1;Sos1;Abl2;Iqgap1;Ptk2;Fer;Fes;
GO:0019722	40	9	1.87215	4.8073	0.000290628	0.00398744	biological_process:calcium-mediated signaling	Ryr2;Cacna1d;Rcan1;Mcu;Plcg1;Ppp1r9b;Lrrk2;Ppp3ca;Ksr2;
GO:0030217	40	9	1.87215	4.8073	0.000290628	0.00398744	biological_process:T cell differentiation	Chd7;Prex1;Pknox1;Bcl11a;Ptpn22;Nfatc3;Kit;Runx2;Itpkb;
GO:0030672	40	9	1.87215	4.8073	0.000290628	0.00398744	cellular_component:synaptic vesicle membrane	Otof;Scamp1;Ica1;Ptprn2;Sv2b;Syt2;Syngr1;Park2;Syt1;
GO:1902476	40	9	1.87215	4.8073	0.000290628	0.00398744	biological_process:chloride transmembrane transport	Glrb;Slc12a7;Clic6;Clcn5;Clcn7;Clic5;Glra3;Ano1;Glra1;
GO:0006306	23	7	1.07649	6.50263	0.000294293	0.00398744	biological_process:DNA methylation	Dnmt1;Ehmt1;Meg3;Gatad2a;Gnas;Nespas;Baz2a;
GO:0021772	23	7	1.07649	6.50263	0.000294293	0.00398744	biological_process:olfactory bulb development	Chd7;Dlx2;Lrrk2;Slit1;Ttc8;Agtpbp1;Crtac1;
GO:0030667	23	7	1.07649	6.50263	0.000294293	0.00398744	cellular_component:secretory granule membrane	Ica1;Itpr2;Ptprn2;Itpr1;Myrip;Itpr3;Rab27a;
GO:0031672	23	7	1.07649	6.50263	0.000294293	0.00398744	cellular_component:A band	Ryr2;Ttn;Kat2b;Hdac4;Klhl40;Ank1;Ppp1r12a;
GO:0035257	23	7	1.07649	6.50263	0.000294293	0.00398744	molecular_function:nuclear hormone receptor binding	Tacc2;Ncoa2;Smarcd3;Ncoa7;Actn4;Ncoa1;Bcas3;
GO:0035335	23	7	1.07649	6.50263	0.000294293	0.00398744	biological_process:peptidyl-tyrosine dephosphorylation	Ptprj;Eya1;Ptpn13;Ptpn1;Ptprs;Ptpro;Ptprf;
GO:0051968	23	7	1.07649	6.50263	0.000294293	0.00398744	biological_process:positive regulation of synaptic transmission, glutamatergic	Ptk2b;Shank2;Tnr;Ntrk2;Nlgn3;Nlgn2;Ngfr;
GO:0090103	23	7	1.07649	6.50263	0.000294293	0.00398744	biological_process:cochlea morphogenesis	Eya1;Zeb1;Gli2;Tshr;Wnt5a;Ptk7;Pax2;
GO:0045766	116	16	5.42924	2.947	0.000294818	0.00398766	biological_process:positive regulation of angiogenesis	Itgb3;Flt1;Prkca;Wnt5a;Ddah1;Pik3r6;Hipk2;Runx1;Ptk2b;Itgb2;Zc3h12a;Anxa3;Plcg1;Vash2;Tert;Hgf;
GO:0010971	16	6	0.748861	8.01217	0.00032191	0.00433915	biological_process:positive regulation of G2/M transition of mitotic cell cycle	Mta3;Pbx1;Sin3a;Rad51b;Rcc2;Smarcd3;
GO:0031402	16	6	0.748861	8.01217	0.00032191	0.00433915	molecular_function:sodium ion binding	Slc24a3;Pdxk;Capn3;Scn8a;Slc24a2;Scn3a;
GO:0060041	71	12	3.32307	3.61112	0.000324068	0.00436074	biological_process:retina development in camera-type eye	Ahi1;Agtpbp1;Rarb;Lama1;Lif;Tulp1;Ttll5;Chd7;Rp1l1;Ntrk2;Slc4a5;Bmpr1b;
GO:0022857	41	9	1.91896	4.69005	0.000340402	0.0045727	molecular_function:transmembrane transporter activity	Slc2a10;Slc22a13;Sv2b;Sec61a1;Slc2a1;Slc22a3;Slc2a13;Slc37a4;Slc2a8;
GO:0002244	94	14	4.39956	3.18214	0.000344047	0.00461376	biological_process:hematopoietic progenitor cell differentiation	Cdk6;Eml1;Top2a;Abca15;Sirpa;Sin3a;Kcnab2;Muc4;Tmem143;Pdgfra;Ssbp3;Col24a1;Sipa1l3;Rbm47;
GO:0001938	61	11	2.85503	3.85284	0.000348843	0.00463843	biological_process:positive regulation of endothelial cell proliferation	Itgb3;Bmp6;Cdh13;Ang;Prkca;Wnt5a;Thbs4;Akt1;Vash2;Rptor;Nf1;
GO:0030326	61	11	2.85503	3.85284	0.000348843	0.00463843	biological_process:embryonic limb morphogenesis	Fbn2;Dync2h1;Ptch1;Chst11;Wnt5a;Fgfr1;Fgf9;Zbtb16;Wnt7a;Pbx1;Gli3;
GO:0042578	61	11	2.85503	3.85284	0.000348843	0.00463843	molecular_function:phosphoric ester hydrolase activity	Gdpd5;Smg6;Zc3h12a;Exo1;Rida;Mpped2;Dclre1c;Eri3;Fig4;Zc3h12d;Aen;
GO:0071456	61	11	2.85503	3.85284	0.000348843	0.00463843	biological_process:cellular response to hypoxia	Prkce;Kcnk3;Suv39h2;Fam162a;Akt1;Tert;Slc9a1;Ppard;Cpeb1;Rora;Cbs;
GO:0072659	61	11	2.85503	3.85284	0.000348843	0.00463843	biological_process:protein localization to plasma membrane	Epb41l3;Tnik;Ramp1;Rap2a;Rab10;Kcnip4;Skap1;Abca12;Ank3;Dpp10;Dpp6;
GO:0008380	231	25	10.8117	2.31231	0.000351718	0.00466235	biological_process:RNA splicing	Khsrp;Srpk2;Ptbp3;Lsm1;Sugp2;Sugp1;Rbm4b;Celf4;Prpf6;Smn1;Zfp326;Hnrnpf;Cwc22;Rbfox3;Casc3;Rbm38;Rnps1;Gemin5;Eftud2;Dcps;Cdc40;Raly;Rbfox1;Ddx39b;Celf3;
GO:0002020	106	15	4.96121	3.02346	0.000351831	0.00466235	molecular_function:protease binding	Cradd;Itgb3;Ttn;Itga3;Dpp4;Serpinc1;Cntnap2;Stim1;Kit;Ubc;Anxa2;Vwf;Ryr1;Fas;Chl1;
GO:0007157	51	10	2.387	4.18937	0.000357858	0.00473423	biological_process:heterophilic cell-cell adhesion via plasma membrane cell adhesion molecules	Cadm1;Tenm1;Tenm3;Nectin4;Tenm2;Nectin2;Ptprd;Cdh4;Cd6;Tenm4;
GO:0006396	72	12	3.36988	3.56096	0.000362776	0.00478315	biological_process:RNA processing	Dhx35;Prpf6;Drosha;Tmtc1;Trub1;Sugp2;Adat1;Dhx36;Exosc10;Sugp1;Dhx33;Ythdc2;
GO:0045165	72	12	3.36988	3.56096	0.000362776	0.00478315	biological_process:cell fate commitment	Wnt9a;Wnt5b;Wnt5a;Sox5;Eya1;Wnt7a;Ror2;Wnt7b;Wnt8a;Smad2;Tead4;Mef2c;
GO:0014065	24	7	1.12329	6.23168	0.000365465	0.00478643	biological_process:phosphatidylinositol 3-kinase signaling	Prex2;Nyap2;Nf1;Pik3r5;Myo16;Erbb2;Pik3r6;
GO:0032728	24	7	1.12329	6.23168	0.000365465	0.00478643	biological_process:positive regulation of interferon-beta production	Irf7;Zfp64;Tlr9;Tbk1;Polr3b;Polr3g;Zbtb20;
GO:0033613	24	7	1.12329	6.23168	0.000365465	0.00478643	molecular_function:activating transcription factor binding	Prdm16;Dhx33;Zfp516;Smad2;Hdac4;Crebbp;Mef2c;
GO:0045663	24	7	1.12329	6.23168	0.000365465	0.00478643	biological_process:positive regulation of myoblast differentiation	Nr2c2;Myog;Boc;Cdon;Plcb1;Mef2c;Map3k5;
GO:0090136	10	5	0.468038	10.6829	0.000369181	0.00481901	biological_process:epithelial cell-cell adhesion	Plekha7;Ctnna1;Vcl;Itgb5;Kifc3;
GO:1990023	10	5	0.468038	10.6829	0.000369181	0.00481901	cellular_component:mitotic spindle midzone	Eml1;Map9;Kif18a;Ttc28;Rcc2;
GO:0001932	62	11	2.90184	3.7907	0.00039422	0.0051203	biological_process:regulation of protein phosphorylation	Prkar1b;Map2k1;Phlpp1;Tlr9;Celsr3;Ppp1r9b;Rptor;Map2k2;Ptk2;Fer;Itpkb;
GO:0005254	62	11	2.90184	3.7907	0.00039422	0.0051203	molecular_function:chloride channel activity	Gabrp;Glrb;Clic6;Gabra5;Fxyd3;Clcn5;Gabrg3;Glra3;Clic5;Ano1;Glra1;
GO:0008542	62	11	2.90184	3.7907	0.00039422	0.0051203	biological_process:visual learning	Pias1;Tanc1;Adra1b;Cacna1c;Nlgn3;Abl2;Dcdc2a;Nf1;Kit;Atxn1;Crhr1;
GO:0005044	42	9	1.96576	4.57838	0.000397001	0.00513093	molecular_function:scavenger receptor activity	Ackr3;Tmprss3;Tmprss2;Tinagl1;Ssc5d;Corin;Tmprss5;Cd6;Stab2;
GO:0007265	42	9	1.96576	4.57838	0.000397001	0.00513093	biological_process:Ras protein signal transduction	Dnmt1;Usp28;Ksr1;Sos1;Shtn1;Setdb1;Plce1;Ulk1;Nf1;
GO:0010506	42	9	1.96576	4.57838	0.000397001	0.00513093	biological_process:regulation of autophagy	Mtcl1;Lrrk2;Fbxl2;Usp10;Abl2;Ulk1;Mapt;Pip4k2a;Park2;
GO:0001965	33	8	1.54453	5.17958	0.000408144	0.00522558	molecular_function:G-protein alpha-subunit binding	Gria1;Igf1r;Gnas;Rgs12;Kcnj6;Ppp5c;Rgs8;Crhr1;
GO:0019216	33	8	1.54453	5.17958	0.000408144	0.00522558	biological_process:regulation of lipid metabolic process	Prkce;Acer1;Bcl11b;Opa3;Irs3;Fgfr4;H2afy;Golm1;
GO:0035116	33	8	1.54453	5.17958	0.000408144	0.00522558	biological_process:embryonic hindlimb morphogenesis	Chd7;Aff3;Rarb;Gnas;Lmbr1;Smarca4;Zbtb16;Wnt7a;
GO:0051721	33	8	1.54453	5.17958	0.000408144	0.00522558	molecular_function:protein phosphatase 2A binding	Ptpn1;Dab2ip;Cacna1b;Ptpa;Akt1;Cacna1c;Smg5;Mapt;
GO:0001942	52	10	2.4338	4.1088	0.000409654	0.00522558	biological_process:hair follicle development	Celsr1;Tgfb2;Sos1;Lgr5;Ldb2;Acvr1b;Aars;Ldb1;Lama5;Eda;
GO:0008080	52	10	2.4338	4.1088	0.000409654	0.00522558	molecular_function:N-acetyltransferase activity	Naa15;Ykt6;Lpgat1;Pnpla3;Ogt;Elp3;Nat6;Kat2b;Hhat;Mboat2;
GO:0034599	52	10	2.4338	4.1088	0.000409654	0.00522558	biological_process:cellular response to oxidative stress	Txnl1;Zc3h12a;Adnp2;Lrrk2;Ppargc1a;Vkorc1l1;Prdx3;Tmem161a;Fancd2;Ngfr;
GO:0046332	52	10	2.4338	4.1088	0.000409654	0.00522558	molecular_function:SMAD binding	Tgfbr3;Acvr1b;Prdm16;Smad2;Magi2;Smad3;Crebbp;Hipk2;Smad4;Bmpr1b;
GO:0006260	120	16	5.61646	2.84877	0.000413474	0.00526575	biological_process:DNA replication	Nfix;Fhit;Prim2;Sin3a;Mcm6;Nup98;Rbbp6;Pola2;Orc1;Pold3;Nfic;Blm;Rfc4;Pole;Rpa1;Mcm2;
GO:0004871	641	52	30.0013	1.73326	0.000417089	0.00526862	molecular_function:obsolete signal transducer activity	Ppp5c;Grm4;Nek6;Gpr31b;Lgr5;Glp1r;Plcg2;F2rl3;Zp3;Gnaq;Vmn2r1;Fpr1;Celsr3;Plce1;Adcyap1r1;Plcb1;Litaf;Gna13;Adra1b;Gnas;Mrgpra3;Gna14;Rgs6;Adgrf1;Zdhhc17;Adra1d;Tshr;Crhr1;Lsp1;Gna12;Gpr160;Cspg4;Adgrg1;Celsr1;Rxfp2;Plcg1;Ackr3;Gabbr2;Gna11;Klra1;Magi2;Tas1r3;Gnao1;Plch2;Ptk2;Olfr56;Ptk2b;Tas1r1;Plcxd3;Chrm5;Adgrb2;Irs3;
GO:0004435	17	6	0.795665	7.54086	0.000419038	0.00526862	molecular_function:phosphatidylinositol phospholipase C activity	Plcb4;Plch2;Plce1;Plcg1;Plcb1;Plcg2;
GO:0048488	17	6	0.795665	7.54086	0.000419038	0.00526862	biological_process:synaptic vesicle endocytosis	Syt2;Amph;Dennd1a;Pacsin1;Scrib;Syt1;
GO:0060292	17	6	0.795665	7.54086	0.000419038	0.00526862	biological_process:long-term synaptic depression	Grid2ip;Ptk2b;Shank2;Gria1;Arf1;Slc24a2;
GO:0090544	17	6	0.795665	7.54086	0.000419038	0.00526862	cellular_component:SWI/SNF superfamily-type complex	Smarca4;Smarcb1;Smarcd3;Arid1b;Smarca2;Pbrm1;
GO:0005623	108	15	5.05481	2.96747	0.000420122	0.00526862	cellular_component:cell	Kif3c;Sun1;Syne2;Dennd2a;Arl2bp;Rab6b;Exoc4;Amph;Syne1;Tex14;Prima1;Ccdc64;Pacs2;Spag4;Ank1;
GO:0004668	5	4	0.234019	17.0926	0.000421087	0.00526862	molecular_function:protein-arginine deiminase activity	Padi2;Padi6;Padi4;Padi3;
GO:0018101	5	4	0.234019	17.0926	0.000421087	0.00526862	biological_process:protein citrullination	Padi2;Padi6;Padi4;Padi3;
GO:0021631	5	4	0.234019	17.0926	0.000421087	0.00526862	biological_process:optic nerve morphogenesis	Ephb1;Pax2;Gli3;Ephb2;
GO:0033093	5	4	0.234019	17.0926	0.000421087	0.00526862	cellular_component:Weibel-Palade body	Ece1;Vwf;Unc13d;Rab27a;
GO:0051098	5	4	0.234019	17.0926	0.000421087	0.00526862	biological_process:regulation of binding	Smad2;Blm;Smad3;Smad4;
GO:0005791	63	11	2.94864	3.73053	0.000444444	0.00555201	cellular_component:rough endoplasmic reticulum	Ntrk2;Zc3h12a;P2rx3;H13;Sec61a1;Ncoa2;Bglap3;Lrpap1;Adcyap1r1;Ncf1;Ngfr;
GO:0008305	25	7	1.1701	5.98241	0.000449765	0.00559177	cellular_component:integrin complex	Itgb6;Itgb3;Itgb2;Itga3;Itgb5;Itga11;Itga9;
GO:0010765	25	7	1.1701	5.98241	0.000449765	0.00559177	biological_process:positive regulation of sodium ion transport	Akt1;Sgk3;Scn5a;Cntn1;Ank3;Gnas;Fgf12;
GO:0048786	25	7	1.1701	5.98241	0.000449765	0.00559177	cellular_component:presynaptic active zone	Bsn;Ncoa2;Shank2;Ntrk2;Dgki;Erc2;Erc1;
GO:0030145	43	9	2.01256	4.4719	0.000461122	0.00572389	molecular_function:manganese ion binding	B4galt1;Galnt2;Dcp2;Nek4;Slc24a2;Mre11a;Abl2;Me1;Adcy2;
GO:0030139	53	10	2.4806	4.03128	0.000467529	0.00579426	cellular_component:endocytic vesicle	Rab11fip4;Dpp4;Trf;Kifc1;Itsn1;Dab2ip;Pik3c2b;Nlgn3;Lrp2;Myo6;
GO:0016567	221	24	10.3436	2.32027	0.000474956	0.00587702	biological_process:protein ubiquitination	Wdsub1;Klhl13;Trim32;Rnf185;March2;Klhl3;Mib1;Akt1;Rnf165;Fbxl2;Ccnc;Klhl2;Wwp2;Rnf43;Ube2ql1;Kcmf1;Rbbp6;Rnf220;Vprbp;Pdzrn3;Arih2;Mdm2;Park2;Hace1;
GO:0051017	34	8	1.59133	5.02724	0.000484477	0.00598538	biological_process:actin filament bundle assembly	Eps8;Baiap2l1;Ezr;Abl2;Actn4;Baiap2;Pcdh15;Baiap2l2;
GO:0001078	122	16	5.71007	2.80207	0.000486816	0.0059954	molecular_function:proximal promoter DNA-binding transcription repressor activity, RNA polymerase II-specific	Foxp2;Tbx15;Nacc2;Tshz2;Dach1;Tbx2;Aebp2;Nfatc2;Crebbp;Zbtb20;Nr2c1;Bcl11a;Zfp148;Cux2;Ppara;Zfp536;
GO:0006814	122	16	5.71007	2.80207	0.000486816	0.0059954	biological_process:sodium ion transport	Scnn1b;Scn5a;Slc9a9;Slc9a8;Asic2;Slc10a7;Scn8a;Asic1;Slc24a3;Slc23a2;Slc9a7;Slc38a8;Slc9a1;Slc38a3;Atp4b;Slc4a8;
GO:0030317	64	11	2.99545	3.67224	0.000499911	0.00613627	biological_process:flagellated sperm motility	Catsperd;Dnah11;Dpcd;Lrrc6;Atp2b4;Ttll5;Neurl1a;Dnah1;Catsper2;Pltp;Celf3;
GO:0042281	64	11	2.99545	3.67224	0.000499911	0.00613627	molecular_function:dolichyl pyrophosphate Man9GlcNAc2 alpha-1,3-glucosyltransferase activity	Galntl6;B4galt1;Galnt2;Galnt15;Wbscr17;Fut7;Galnt14;Alg8;Pigz;Galnt18;Galnt5;
GO:0006874	98	14	4.58678	3.05225	0.000500601	0.00613627	biological_process:cellular calcium ion homeostasis	Itgb3;Ryr2;Prkca;Inpp4b;Atp2b4;Stim1;Atp2b1;Nucb2;Slc24a3;Atp2b2;Slc24a2;Ryr1;Cacna1c;Slc37a4;
GO:0005198	185	21	8.65871	2.4253	0.000502567	0.00615076	molecular_function:structural molecule activity	Iffo2;Lmnb2;Sntg2;Krt42;Ctnna2;Cldn10;Sntg1;Dlg4;Crocc;Epb41l3;Vcl;Epb41l1;Sntb1;Lmna;Cldn15;Col5a3;Cdc42se2;Synm;Col15a1;Ctnna1;Copg2;
GO:0004143	11	5	0.514842	9.71172	0.000517179	0.00630011	molecular_function:diacylglycerol kinase activity	Dgkd;Dgkh;Dgkz;Dgkg;Dgki;
GO:0035385	11	5	0.514842	9.71172	0.000517179	0.00630011	biological_process:Roundabout signaling pathway	Slit3;Robo1;Slit1;Myo9b;Robo2;
GO:0035721	11	5	0.514842	9.71172	0.000517179	0.00630011	biological_process:intraciliary retrograde transport	Ick;Ttc21b;Dync2h1;Ift43;Ttc21a;
GO:0042734	54	10	2.52741	3.95662	0.000532023	0.00645885	cellular_component:presynaptic membrane	Cadps2;Syt7;Grm4;Kcnh1;Scrib;Grik5;Syt1;Nrxn2;Erc2;Grik4;
GO:0045727	54	10	2.52741	3.95662	0.000532023	0.00645885	biological_process:positive regulation of translation	Ptk2b;Fam129a;Prr16;Mapk1;Eif4g3;Larp4b;Cpeb1;Ddx39b;Erbb2;Rbms3;
GO:0001917	44	9	2.05937	4.37027	0.000533504	0.00645885	cellular_component:photoreceptor inner segment	Shank2;Cdh23;Rdh11;Aipl1;Rapgef4;Myo3b;Tulp1;Myo7a;Crocc;
GO:0010212	44	9	2.05937	4.37027	0.000533504	0.00645885	biological_process:response to ionizing radiation	Usp28;Bre;Mta1;Rad51b;Eya3;Dclre1c;Eya1;Fam175a;Aen;
GO:0016339	18	6	0.842469	7.12192	0.000537586	0.00646835	biological_process:calcium-dependent cell-cell adhesion via plasma membrane cell adhesion molecules	Pcdhga12;Cdh13;Pcdhgc3;Cdh22;Cdh23;Arvcf;
GO:0031589	18	6	0.842469	7.12192	0.000537586	0.00646835	biological_process:cell-substrate adhesion	Itgb3;Sorbs3;Ephb1;Gas6;Ppard;Vwf;
GO:0048598	18	6	0.842469	7.12192	0.000537586	0.00646835	biological_process:embryonic morphogenesis	Hnf1b;Zeb1;Zeb2;Flt1;Cdon;Gli3;
GO:0061003	18	6	0.842469	7.12192	0.000537586	0.00646835	biological_process:positive regulation of dendritic spine morphogenesis	Stau2;Kalrn;Cux2;Lrp8;Baiap2;Camk2b;
GO:0007204	136	17	6.36532	2.67072	0.000542652	0.0065193	biological_process:positive regulation of cytosolic calcium ion concentration	Chrna10;Gna13;Cacna1a;Adra1b;Cacna1c;Abl2;Dlg4;Glp1r;Itpr1;Plcg2;Itpr3;Pdgfra;Ptk2b;Pla2g6;Jak3;Adra1d;Crhr1;
GO:0015293	111	15	5.19523	2.88727	0.000543695	0.00652184	molecular_function:symporter activity	Slc45a1;Slc6a1;Slc10a7;Slc1a7;Slc24a3;Slc36a4;Slc6a6;Slc12a8;Slc6a17;Slc23a2;Slc12a7;Slc6a5;Slc6a2;Slc38a3;Slc6a11;
GO:0030286	26	7	1.2169	5.75232	0.00054887	0.00655386	cellular_component:dynein complex	Dnah17;Dync2h1;Dync2li1;Dnah12;Dnah8;Dync1i1;Disc1;
GO:0048675	26	7	1.2169	5.75232	0.00054887	0.00655386	biological_process:axon extension	Sema5b;Nlgn3;Ulk1;Vcl;Sema7a;Mapt;Dclk1;
GO:0048843	26	7	1.2169	5.75232	0.00054887	0.00655386	biological_process:negative regulation of axon extension involved in axon guidance	Sema5b;Sema4g;Sema4d;Slit1;Sema4f;Sema6a;Wnt5a;
GO:0000030	65	11	3.04225	3.61575	0.000561042	0.00667887	molecular_function:mannosyltransferase activity	Galntl6;B4galt1;Alg1;Galnt2;Galnt15;Wbscr17;Fut7;Galnt14;Pigz;Galnt18;Galnt5;
GO:0000033	65	11	3.04225	3.61575	0.000561042	0.00667887	molecular_function:alpha-1,3-mannosyltransferase activity	Galntl6;B4galt1;Galnt2;Galnt15;Wbscr17;Fut7;Galnt14;Alg8;Pigz;Galnt18;Galnt5;
GO:0005834	35	8	1.63813	4.88361	0.000571972	0.00674754	cellular_component:heterotrimeric G-protein complex	Gna14;Gna13;Gna12;Rgs6;Gnao1;Gnas;Gna11;Gnaq;
GO:0008748	35	8	1.63813	4.88361	0.000571972	0.00674754	molecular_function:N-ethylmaleimide reductase activity	Cryzl1;Aifm2;Enox1;Pyroxd2;Vat1l;Gfod1;Noxred1;Cyb561a3;
GO:0043738	35	8	1.63813	4.88361	0.000571972	0.00674754	molecular_function:reduced coenzyme F420 dehydrogenase activity	Cryzl1;Aifm2;Enox1;Pyroxd2;Vat1l;Gfod1;Noxred1;Cyb561a3;
GO:0043826	35	8	1.63813	4.88361	0.000571972	0.00674754	molecular_function:sulfur oxygenase reductase activity	Cryzl1;Aifm2;Enox1;Pyroxd2;Vat1l;Gfod1;Noxred1;Cyb561a3;
GO:0043883	35	8	1.63813	4.88361	0.000571972	0.00674754	molecular_function:malolactic enzyme activity	Cryzl1;Aifm2;Enox1;Pyroxd2;Vat1l;Gfod1;Noxred1;Cyb561a3;
GO:0052693	35	8	1.63813	4.88361	0.000571972	0.00674754	molecular_function:epoxyqueuosine reductase activity	Cryzl1;Aifm2;Enox1;Pyroxd2;Vat1l;Gfod1;Noxred1;Cyb561a3;
GO:0001228	100	14	4.68038	2.99121	0.000599281	0.00705909	molecular_function:DNA-binding transcription activator activity, RNA polymerase II-specific	Nfix;Elf5;Ikzf3;Nfatc3;Klf9;Crebbp;Smad4;Runx1;Rad21;Pknox1;Csrnp3;Glis1;Dlx2;Myog;
GO:0032587	55	10	2.57421	3.88469	0.000603707	0.00707935	cellular_component:ruffle membrane	Ptprj;Itgb3;Eps8;Ppp1r9b;Diaph1;Pacsin1;Sntg1;Dlc1;Wwc1;Myo6;
GO:0043765	55	10	2.57421	3.88469	0.000603707	0.00707935	molecular_function:T/G mismatch-specific endonuclease activity	Gdpd5;Smg6;Zc3h12a;Exo1;Rida;Mpped2;Dclre1c;Eri3;Zc3h12d;Aen;
GO:0044824	55	10	2.57421	3.88469	0.000603707	0.00707935	molecular_function:retroviral 3' processing activity	Gdpd5;Smg6;Zc3h12a;Exo1;Rida;Mpped2;Dclre1c;Eri3;Zc3h12d;Aen;
GO:0006836	45	9	2.10617	4.27315	0.000614933	0.00720023	biological_process:neurotransmitter transport	Slc6a6;Ica1;Sv2b;Slc6a1;Slc6a17;Cplx2;Slc6a5;Slc6a2;Slc6a11;
GO:0004519	77	12	3.6039	3.32973	0.000620034	0.00723834	molecular_function:endonuclease activity	Rida;Drosha;Dnase1l3;Zc3h12d;Endov;Ang;Smg6;Zc3h12a;Exo1;Mre11a;Dclre1c;Rnase4;
GO:0030900	77	12	3.6039	3.32973	0.000620034	0.00723834	biological_process:forebrain development	Dync2h1;Mkl1;Trp73;Dlc1;Gli3;Dclk1;Kdm2b;Fyn;Smarca4;Lrp2;Notch3;Mkl2;
GO:0001570	66	11	3.08905	3.56096	0.000628279	0.007302	biological_process:vasculogenesis	Ptprj;Ackr3;Myo1e;Ccm2;Ntrk2;Tgfbr3;Smarca4;Epha2;Has2;Zmiz1;Ptk2;
GO:0006461	66	11	3.08905	3.56096	0.000628279	0.007302	biological_process:protein-containing complex assembly	Cd74;Capn3;Traf2;Shank1;Tgfbr3;Slc2a1;Pex14;Ssbp3;Mdm2;Zfp148;Dlg4;
GO:0043525	66	11	3.08905	3.56096	0.000628279	0.007302	biological_process:positive regulation of neuron apoptotic process	Hdac4;Tgfb2;Ptprf;Tfap2b;Musk;Rapsn;Srpk2;Grik5;Ddit3;Ppp2r2b;Nf1;
GO:0034260	27	7	1.2637	5.53927	0.000664572	0.00768962	biological_process:negative regulation of GTPase activity	Mkks;Lrrk2;Ptprn2;Ttc8;Dab2ip;Rcc2;Bcas3;
GO:0043113	27	7	1.2637	5.53927	0.000664572	0.00768962	biological_process:receptor clustering	Musk;Dlg2;Itgb2;Grik5;Cacna1a;Magi2;Dlg4;
GO:0045499	27	7	1.2637	5.53927	0.000664572	0.00768962	molecular_function:chemorepellent activity	Sema5b;Sema4g;Sema4d;Sema4f;Sema6a;Nrg3;Efna5;
GO:0001656	36	8	1.68494	4.74795	0.000671797	0.0076938	biological_process:metanephros development	Aph1c;Robo2;Pax2;Fbn1;Eya1;Gdnf;Nf1;Gli3;
GO:0030177	36	8	1.68494	4.74795	0.000671797	0.0076938	biological_process:positive regulation of Wnt signaling pathway	Sulf1;Disc1;Depdc1b;Smarca4;Rspo1;Zeb2;Tert;Csnk2a1;
GO:0048754	36	8	1.68494	4.74795	0.000671797	0.0076938	biological_process:branching morphogenesis of an epithelial tube	B4galt1;Mmp14;Pxn;Egf;Hnf1b;Lama5;Gli2;Gli3;
GO:0005915	6	4	0.280823	14.2438	0.000676869	0.0076938	cellular_component:zonula adherens	Ctnna1;Plekha7;Nectin2;Kifc3;
GO:0016576	6	4	0.280823	14.2438	0.000676869	0.0076938	biological_process:histone dephosphorylation	Ppp5c;Eya4;Eya3;Eya1;
GO:0016934	6	4	0.280823	14.2438	0.000676869	0.0076938	molecular_function:extracellularly glycine-gated chloride channel activity	Glra1;Chrm5;Glra3;Glrb;
GO:0030913	6	4	0.280823	14.2438	0.000676869	0.0076938	biological_process:paranodal junction assembly	Epb41l3;Cntnap1;Cd9;Nfasc;
GO:0042471	6	4	0.280823	14.2438	0.000676869	0.0076938	biological_process:ear morphogenesis	Chd7;Nipbl;Gjb6;Eya1;
GO:0043549	6	4	0.280823	14.2438	0.000676869	0.0076938	biological_process:regulation of kinase activity	Ldb2;Ldb1;Nlrc5;Mcph1;
GO:0001508	19	6	0.889273	6.74708	0.000680624	0.0076938	biological_process:action potential	Kcnmb2;Kcnmb3;Gnaq;Kcnb1;Glra1;Gna11;
GO:0005328	19	6	0.889273	6.74708	0.000680624	0.0076938	molecular_function:neurotransmitter:sodium symporter activity	Slc6a6;Slc6a5;Slc6a1;Slc6a17;Slc6a2;Slc6a11;
GO:0005605	19	6	0.889273	6.74708	0.000680624	0.0076938	cellular_component:basement membrane	Entpd2;Ang;Lama5;Lama4;Lama2;Lama1;
GO:0016581	19	6	0.889273	6.74708	0.000680624	0.0076938	cellular_component:NuRD complex	Nacc2;Mta1;Mta3;Csnk2a1;Gatad2a;Chd4;
GO:0032332	19	6	0.889273	6.74708	0.000680624	0.0076938	biological_process:positive regulation of chondrocyte differentiation	Sox5;Bmp6;Zbtb16;Runx2;Smad3;Gli3;
GO:0034704	19	6	0.889273	6.74708	0.000680624	0.0076938	cellular_component:calcium channel complex	Ryr1;Ryr2;Mcu;Micu2;Pde4d;Ptpa;
GO:1903861	19	6	0.889273	6.74708	0.000680624	0.0076938	biological_process:positive regulation of dendrite extension	Syt2;Rasal1;Cpne5;Syt17;Park2;Syt1;
GO:0042475	56	10	2.62101	3.81532	0.000683182	0.00771161	biological_process:odontogenesis of dentin-containing tooth	Pdgfra;Wnt7b;Bcl11b;Nfic;Dlx2;Lama5;Gli2;Runx2;Gli3;Eda;
GO:0008104	78	12	3.6507	3.28704	0.000686536	0.00772722	biological_process:protein localization	Grip1;Nbea;Kif5c;Als2cl;Disc1;Ulk1;Clic5;Ist1;Tns4;Kif26b;Crocc;Immp2l;
GO:0045444	78	12	3.6507	3.28704	0.000686536	0.00772722	biological_process:fat cell differentiation	Pias1;Trim32;Bbs9;Mkks;Tfap2b;Bscl2;Plcb1;Mettl8;Sdf4;Ttc8;Nipbl;Creb5;
GO:0017148	67	11	3.13586	3.50781	0.000702088	0.0078684	biological_process:negative regulation of translation	Gigyf2;Prkca;Rida;Dapk1;Rara;Ang;Malsu1;Eif4enif1;Trim71;Eif2ak2;Cpeb1;
GO:0046330	67	11	3.13586	3.50781	0.000702088	0.0078684	biological_process:positive regulation of JNK cascade	Wnt5a;Wnt7a;Plcb1;Hipk2;Ptk2b;Wnt7b;Dab2ip;Ripk1;Map3k5;Ankrd6;Stk3;
GO:0048306	67	11	3.13586	3.50781	0.000702088	0.0078684	molecular_function:calcium-dependent protein binding	Masp1;Lrp8;Cplx2;Myo1d;Tnnc2;Syt1;Anxa11;Grm4;Anxa3;Anxa2;Slc9a1;
GO:0034211	12	5	0.561646	8.9024	0.000705672	0.00787482	molecular_function:GTP-dependent protein kinase activity	Alpk1;Lrrk2;Alpk3;Adck5;Adrbk2;
GO:0044548	12	5	0.561646	8.9024	0.000705672	0.00787482	molecular_function:S100 protein binding	Ezr;Anxa2;Anxa11;Kcnk3;Iqgap1;
GO:0051764	12	5	0.561646	8.9024	0.000705672	0.00787482	biological_process:actin crosslink formation	Eps8;Baiap2l1;Baiap2;Baiap2l2;Cobl;
GO:0048511	127	16	5.94409	2.69175	0.000720594	0.00802991	biological_process:rhythmic process	Npas2;Ogt;Top2a;Sin3a;Ppargc1a;Klf9;Crebbp;Ngfr;Mta1;Enox1;Suv39h2;Ncoa2;Per3;Kat2b;Ppara;Rora;
GO:0010977	57	10	2.66782	3.74838	0.000771082	0.00856818	biological_process:negative regulation of neuron projection development	Crmp1;Ntm;Map4k4;Ptprg;Tnr;Mag;Mdm2;Cspg4;Ngfr;Spock1;
GO:0050727	57	10	2.66782	3.74838	0.000771082	0.00856818	biological_process:regulation of inflammatory response	Ggt1;Mta1;Tlr9;Drosha;Gpx4;Sema7a;Tnip1;Mcph1;Fancd2;Adamts12;
GO:0000922	68	11	3.18266	3.45623	0.000782956	0.00868782	cellular_component:spindle pole	Mad1l1;Dync1i1;Nin;Pkp4;Sbds;Mtcl1;Katnb1;Tubgcp2;Cdc14a;Nedd9;Cspp1;
GO:0050253	37	8	1.73174	4.61963	0.000785188	0.00868801	molecular_function:retinyl-palmitate esterase activity	Ces1b;Ces2g;Pnpla5;Nceh1;Ces2h;Plb1;Dagla;Ddhd1;
GO:0060976	37	8	1.73174	4.61963	0.000785188	0.00868801	biological_process:coronary vasculature development	Dync2h1;Tgfbr3;Tab1;Robo1;Ptk7;Pde2a;Smarca4;Lrp2;
GO:0003341	28	7	1.31051	5.34144	0.000798772	0.00880108	biological_process:cilium movement	Lrrc6;Ccdc63;Ccdc114;Cfap53;Dnah10;Dnah11;Hydin;
GO:0005771	28	7	1.31051	5.34144	0.000798772	0.00880108	cellular_component:multivesicular body	Steap3;Sorl1;Cd74;Zp3;Sftpc;Crhbp;Crhr1;
GO:0035249	28	7	1.31051	5.34144	0.000798772	0.00880108	biological_process:synaptic transmission, glutamatergic	Cnih2;Cnih3;Unc13b;Park2;Grik5;Cacna1a;Clstn3;
GO:0004620	47	9	2.19978	4.09132	0.000808301	0.00888112	molecular_function:phospholipase activity	Ces1b;Pnliprp2;Ces2g;Pnpla5;Nceh1;Ces2h;Dagla;Ddhd1;Pla2g4e;
GO:0021915	47	9	2.19978	4.09132	0.000808301	0.00888112	biological_process:neural tube development	Nup133;Wnt5a;Epha2;Gli2;Trim71;Ift172;Nf1;Itpk1;Gli3;
GO:0021591	20	6	0.936077	6.40973	0.000851412	0.00931566	biological_process:ventricular system development	Dpcd;Ttn;Ak8;Ttc21b;Hydin;Ulk4;
GO:0030318	20	6	0.936077	6.40973	0.000851412	0.00931566	biological_process:melanocyte differentiation	1700112E06Rik;Kit;Oca2;Gli3;Mef2c;Rab27a;
GO:0034614	20	6	0.936077	6.40973	0.000851412	0.00931566	biological_process:cellular response to reactive oxygen species	Atg7;Pdgfra;Prdx3;Ppargc1b;Fer;Agap3;
GO:0007389	58	10	2.71462	3.68375	0.000868069	0.00948468	biological_process:pattern specification process	Zeb1;Ptch1;Mfng;Mdga2;Eya1;Smad2;Gli2;Nrg3;Gli3;Crkl;
GO:0016525	69	11	3.22946	3.40614	0.000871393	0.00950776	biological_process:negative regulation of angiogenesis	Col4a2;Ptn;Lif;Lect1;Ngfr;Adgrb1;Dab2ip;Sulf1;Adgrb2;Epha2;Nf1;
GO:0005109	38	8	1.77855	4.49806	0.000913451	0.009939	molecular_function:frizzled binding	Ror2;Wnt7b;Wnt9a;Wnt5b;Wnt5a;Wnt8a;Rnf43;Wnt7a;
GO:0050714	38	8	1.77855	4.49806	0.000913451	0.009939	biological_process:positive regulation of protein secretion	Ang;Sec24a;Rapgef4;Tgfb2;Myo18a;Ezr;Kcnn4;Arf1;
GO:0035019	48	9	2.24658	4.00608	0.000922035	0.0100185	biological_process:somatic stem cell population maintenance	Bcl9l;Ldb2;Elf5;Ldb1;Prdm16;Raf1;Erdr1;Wnt7a;Kit;
GO:0004698	13	5	0.60845	8.2176	0.000941125	0.0101417	molecular_function:calcium-dependent protein kinase C activity	Alpk1;Prkca;Alpk3;Adck5;Adrbk2;
GO:0016322	13	5	0.60845	8.2176	0.000941125	0.0101417	biological_process:neuron remodeling	Farp2;Anks1;Gnaq;Abl2;Cspg4;
GO:0016514	13	5	0.60845	8.2176	0.000941125	0.0101417	cellular_component:SWI/SNF complex	Smarca4;Smarcb1;Smarcd3;Arid1b;Smarca2;
GO:0035254	13	5	0.60845	8.2176	0.000941125	0.0101417	molecular_function:glutamate receptor binding	Atp2b2;Plcg1;Dlg4;Camk2a;Homer2;
GO:0036120	13	5	0.60845	8.2176	0.000941125	0.0101417	biological_process:cellular response to platelet-derived growth factor stimulus	Itgb3;Prkce;Has2;Fyn;Iqgap1;
GO:0043194	13	5	0.60845	8.2176	0.000941125	0.0101417	cellular_component:axon initial segment	Kcnq2;Ank3;Scn8a;Bin1;Nfasc;
GO:0004712	29	7	1.35731	5.15726	0.000953482	0.0102187	molecular_function:protein serine/threonine/tyrosine kinase activity	Akt1;Aurkc;Aurka;Map2k1;Map2k2;Dyrk1a;Tesk2;
GO:0045296	29	7	1.35731	5.15726	0.000953482	0.0102187	molecular_function:cadherin binding	Ptprt;Cdh13;Ctnna1;Ctnna2;Ctnna3;Ank3;Fer;
GO:0048709	29	7	1.35731	5.15726	0.000953482	0.0102187	biological_process:oligodendrocyte differentiation	Ptprj;Sox5;Ntrk2;Nlgn3;Exoc4;Erbb2;Gli3;
GO:0051928	29	7	1.35731	5.15726	0.000953482	0.0102187	biological_process:positive regulation of calcium ion transport	Jak3;Cacna1d;Camk2a;Atp2b2;Itpr1;Mylk;Cacnb2;
GO:0005815	82	12	3.83792	3.1267	0.00101523	0.0108321	cellular_component:microtubule organizing center	Ndrg2;Rab11fip3;Pde4dip;Dzip1;Aurka;Tubgcp2;Nek6;Pax2;Pla2g6;Cspp1;Ift43;Dab1;
GO:0051028	82	12	3.83792	3.1267	0.00101523	0.0108321	biological_process:mRNA transport	Khsrp;Nup160;Ncbp3;Kif5c;Casc3;Nup133;Nup98;Mcm3ap;Igf2bp3;Cpeb1;Ddx39b;Gle1;
GO:0044297	94	13	4.39956	2.95484	0.00102202	0.0108321	cellular_component:cell body	Entpd2;Gabra5;Syt11;Mapt;Ptk2b;Ptpn13;Rlbp1;Gnao1;Disc1;Ezr;Gnaq;Acot7;Alk;
GO:0015180	7	4	0.327627	12.209	0.00102591	0.0108321	molecular_function:L-alanine transmembrane transporter activity	Slc36a3;Slc36a4;Slc36a2;Slc38a3;
GO:0021517	7	4	0.327627	12.209	0.00102591	0.0108321	biological_process:ventral spinal cord development	Dab1;Foxp1;Lrp8;Gli2;
GO:0030306	7	4	0.327627	12.209	0.00102591	0.0108321	molecular_function:ADP-ribosylation factor binding	Rab11fip3;Sorl1;Rab11fip4;Adcyap1r1;
GO:0036302	7	4	0.327627	12.209	0.00102591	0.0108321	biological_process:atrioventricular canal development	Chd7;Has2;Smad4;Tbx2;
GO:0050957	7	4	0.327627	12.209	0.00102591	0.0108321	biological_process:equilibrioception	Myo7a;Cdh23;Pcdh15;Ankfn1;
GO:0070097	7	4	0.327627	12.209	0.00102591	0.0108321	molecular_function:delta-catenin binding	Ptprj;Plekha7;Ptprt;Dact3;
GO:2000096	7	4	0.327627	12.209	0.00102591	0.0108321	biological_process:positive regulation of Wnt signaling pathway, planar cell polarity pathway	Ankrd6;Nkd1;Abl2;Mllt3;
GO:2000344	7	4	0.327627	12.209	0.00102591	0.0108321	biological_process:positive regulation of acrosome reaction	Plb1;Glra1;Plcb1;Zp3;
GO:0008023	21	6	0.982881	6.1045	0.00105339	0.011048	cellular_component:transcription elongation factor complex	Ice2;Ell;Ikbkap;Elp2;Mllt3;Elp3;
GO:0008589	21	6	0.982881	6.1045	0.00105339	0.011048	biological_process:regulation of smoothened signaling pathway	Ptch1;Gli2;Ift172;Ttc21b;Rora;Tctn1;
GO:0030325	21	6	0.982881	6.1045	0.00105339	0.011048	biological_process:adrenal gland development	Pdgfra;Pbx1;Igf1r;Nf1;Insr;Crhr1;
GO:0030506	21	6	0.982881	6.1045	0.00105339	0.011048	molecular_function:ankyrin binding	Kcnq2;Ttn;Scn5a;Cacna1d;Rhbg;Plec;
GO:0031674	21	6	0.982881	6.1045	0.00105339	0.011048	cellular_component:I band	Ryr1;Ttn;Bin1;Kat2b;Cacna1s;Klhl40;
GO:0003714	152	18	7.11418	2.53016	0.00108065	0.0113187	molecular_function:transcription corepressor activity	Ctbp2;Pias1;Hdac4;Tfap2b;Sin3a;Aebp2;Hipk2;Mta1;Hdac9;Ctbp1;Bcl11a;Cbfa2t3;Ywhab;Ddit3;Rara;Pex14;Smarca4;Kctd1;
GO:0042593	120	15	5.61646	2.67072	0.00111547	0.0116679	biological_process:glucose homeostasis	Mbd5;Mcu;Gpi1;Tfap2b;Fgfr4;Kcnb1;Ngfr;Ptch1;Adra1b;Akt1;Cacna1c;Pomc;Slc37a4;Insr;Dhps;
GO:0000186	30	7	1.40412	4.98535	0.00113082	0.01175	biological_process:activation of MAPKK activity	Map3k13;Lrrk2;Raf1;Egf;Eif2ak2;Zak;Map3k5;
GO:0008277	30	7	1.40412	4.98535	0.00113082	0.01175	biological_process:regulation of G protein-coupled receptor signaling pathway	Kctd8;Itgb3;Plce1;Homer2;Phf24;Ramp1;Plcb1;
GO:0032420	30	7	1.40412	4.98535	0.00113082	0.01175	cellular_component:stereocilium	Twf2;Cdh23;Eps8;Myo7a;Clic5;Tspear;Pcdh15;
GO:0042327	30	7	1.40412	4.98535	0.00113082	0.01175	biological_process:positive regulation of phosphorylation	Ang;Egf;Dscam;Ppargc1b;Trf;Insr;Ripk1;
GO:0045739	30	7	1.40412	4.98535	0.00113082	0.01175	biological_process:positive regulation of DNA repair	Npas2;Eya1;Eya4;Bre;Tmem161a;Eya3;Fam175a;
GO:0003151	50	9	2.34019	3.84584	0.00118843	0.0122998	biological_process:outflow tract morphogenesis	Tgfb2;Nipbl;Ryr1;Smarca4;Eya1;Tbx20;Dhrs3;Tbx2;Mef2c;
GO:0008286	50	9	2.34019	3.84584	0.00118843	0.0122998	biological_process:insulin receptor signaling pathway	Ptpn1;Baiap2l1;Akt1;Irs3;Baiap2;Insr;Plcb1;Slc2a8;Baiap2l2;
GO:0014704	50	9	2.34019	3.84584	0.00118843	0.0122998	cellular_component:intercalated disc	Scn5a;Vcl;Capzb;Adra1b;Tmem65;Ctnna1;Slc9a1;Ptk2;Ank3;
GO:0010595	40	8	1.87215	4.27316	0.00122014	0.0126001	biological_process:positive regulation of endothelial cell migration	Itgb3;Ptk2b;Zc3h12a;Anxa3;Prkca;Wnt5a;Bcas3;Wnt7a;
GO:0001933	84	12	3.93152	3.05225	0.00122316	0.0126001	biological_process:negative regulation of protein phosphorylation	Fam129a;Ntrk3;Ctdspl;Prkca;Ogt;Lrrk2;Ppargc1a;Ppp5c;Zc3h12a;Dab2ip;Park2;Insr;
GO:0005355	14	5	0.655254	7.63063	0.00123029	0.0126001	molecular_function:glucose transmembrane transporter activity	Slc2a10;Slc2a13;Slc2a8;Slc2a1;Slc45a1;
GO:0030676	14	5	0.655254	7.63063	0.00123029	0.0126001	molecular_function:Rac guanyl-nucleotide exchange factor activity	Farp2;Kalrn;Farp1;Prex2;Vav3;
GO:0045055	14	5	0.655254	7.63063	0.00123029	0.0126001	biological_process:regulated exocytosis	Rab31;Crhbp;Pex5l;Rab11fip1;Abca12;
GO:0051642	14	5	0.655254	7.63063	0.00123029	0.0126001	biological_process:centrosome localization	Sema6a;Pard3;Syne2;Aurka;Nin;
GO:0051893	14	5	0.655254	7.63063	0.00123029	0.0126001	biological_process:regulation of focal adhesion assembly	Gpm6b;Ptk2;Ldb1;Wdpcp;Efna5;
GO:2000060	14	5	0.655254	7.63063	0.00123029	0.0126001	biological_process:positive regulation of ubiquitin-dependent protein catabolic process	Sumo3;Ptk2;Ptk2b;Disc1;Egf;
GO:0001964	22	6	1.02968	5.82703	0.00129018	0.0130937	biological_process:startle response	Npas3;Park2;Kcnh1;Glra1;Glrb;Pcdh15;
GO:0003785	22	6	1.02968	5.82703	0.00129018	0.0130937	molecular_function:actin monomer binding	Mtss1;Prkce;Twf2;Mkl1;Pknox2;Cobl;
GO:0004623	22	6	1.02968	5.82703	0.00129018	0.0130937	molecular_function:phospholipase A2 activity	Pla2g6;Pla2g4e;Plb1;Pnpla3;Pla2g4b;Abhd3;
GO:0005385	22	6	1.02968	5.82703	0.00129018	0.0130937	molecular_function:zinc ion transmembrane transporter activity	Slc30a2;Slc39a4;Slc30a10;Slc30a7;Slc39a8;Slc39a14;
GO:0006928	22	6	1.02968	5.82703	0.00129018	0.0130937	biological_process:movement of cell or subcellular component	Sirpa;Pxn;Enah;Ptk2;Cd9;Elmo1;
GO:0046579	22	6	1.02968	5.82703	0.00129018	0.0130937	biological_process:positive regulation of Ras protein signal transduction	Rasgef1a;Dgki;Map2k1;Sos1;Erbb2;Itpkb;
GO:0060045	22	6	1.02968	5.82703	0.00129018	0.0130937	biological_process:positive regulation of cardiac muscle cell proliferation	Fgf9;Tbx20;Tbx2;Fgfr1;Mef2c;Ncam1;
GO:0004693	31	7	1.45092	4.82453	0.00133299	0.0132499	molecular_function:cyclin-dependent protein serine/threonine kinase activity	Ick;Ccnk;Mok;Cdk6;Cdk14;Ccnd3;Cdk20;
GO:0017112	31	7	1.45092	4.82453	0.00133299	0.0132499	molecular_function:Rab guanyl-nucleotide exchange factor activity	Sbf2;Dennd2c;Dennd1a;Ric1;Dennd2a;St5;Als2cl;
GO:0030507	31	7	1.45092	4.82453	0.00133299	0.0132499	molecular_function:spectrin binding	Nphs1;Myo10;Myo7a;Ank3;Dync1i1;Ank1;Sptan1;
GO:0032266	31	7	1.45092	4.82453	0.00133299	0.0132499	molecular_function:phosphatidylinositol-3-phosphate binding	Tecpr1;Zfyve28;Fam21;Dennd1a;Zfyve26;Pard3;Dab2ip;
GO:0051209	31	7	1.45092	4.82453	0.00133299	0.0132499	biological_process:release of sequestered calcium ion into cytosol	Ryr1;Ryr2;Prkce;Glp1r;Itpr1;Ddit3;Plcg2;
GO:0007200	51	9	2.387	3.77043	0.00134316	0.0132499	biological_process:phospholipase C-activating G protein-coupled receptor signaling pathway	Trhr2;Tgm2;Fpr1;Adra1b;Plce1;Adra1d;Gnaq;Ano1;Crhr1;
GO:0045111	51	9	2.387	3.77043	0.00134316	0.0132499	cellular_component:intermediate filament cytoskeleton	Syne2;Padi6;Smarca2;Mrps23;Bcas3;Plec;Ndor1;Nup35;Trim29;
GO:0000009	62	10	2.90184	3.44609	0.0013613	0.0132499	molecular_function:alpha-1,6-mannosyltransferase activity	Galntl6;B4galt1;Galnt2;Galnt15;Wbscr17;Fut7;Galnt14;Pigz;Galnt18;Galnt5;
GO:0000026	62	10	2.90184	3.44609	0.0013613	0.0132499	molecular_function:alpha-1,2-mannosyltransferase activity	Galntl6;B4galt1;Galnt2;Galnt15;Wbscr17;Fut7;Galnt14;Pigz;Galnt18;Galnt5;
GO:0004376	62	10	2.90184	3.44609	0.0013613	0.0132499	molecular_function:glycolipid mannosyltransferase activity	Galntl6;B4galt1;Galnt2;Galnt15;Wbscr17;Fut7;Galnt14;Pigz;Galnt18;Galnt5;
GO:0007005	62	10	2.90184	3.44609	0.0013613	0.0132499	biological_process:mitochondrion organization	Nrf1;Camkmt;Agtpbp1;Spg7;Cluh;Atg7;Lrrk2;Ppargc1a;Prdx3;Tert;
GO:0008755	62	10	2.90184	3.44609	0.0013613	0.0132499	molecular_function:O antigen polymerase activity	Galntl6;B4galt1;Galnt2;Galnt15;Wbscr17;Fut7;Galnt14;Pigz;Galnt18;Galnt5;
GO:0008921	62	10	2.90184	3.44609	0.0013613	0.0132499	molecular_function:lipopolysaccharide-1,6-galactosyltransferase activity	Galntl6;B4galt1;Galnt2;Galnt15;Wbscr17;Fut7;Galnt14;Pigz;Galnt18;Galnt5;
GO:0016759	62	10	2.90184	3.44609	0.0013613	0.0132499	molecular_function:cellulose synthase activity	Galntl6;B4galt1;Galnt2;Galnt15;Wbscr17;Fut7;Galnt14;Pigz;Galnt18;Galnt5;
GO:0018715	62	10	2.90184	3.44609	0.0013613	0.0132499	molecular_function:9-phenanthrol UDP-glucuronosyltransferase activity	Galntl6;B4galt1;Galnt2;Galnt15;Wbscr17;Fut7;Galnt14;Pigz;Galnt18;Galnt5;
GO:0018716	62	10	2.90184	3.44609	0.0013613	0.0132499	molecular_function:1-phenanthrol glycosyltransferase activity	Galntl6;B4galt1;Galnt2;Galnt15;Wbscr17;Fut7;Galnt14;Pigz;Galnt18;Galnt5;
GO:0018717	62	10	2.90184	3.44609	0.0013613	0.0132499	molecular_function:9-phenanthrol glycosyltransferase activity	Galntl6;B4galt1;Galnt2;Galnt15;Wbscr17;Fut7;Galnt14;Pigz;Galnt18;Galnt5;
GO:0018718	62	10	2.90184	3.44609	0.0013613	0.0132499	molecular_function:1,2-dihydroxy-phenanthrene glycosyltransferase activity	Galntl6;B4galt1;Galnt2;Galnt15;Wbscr17;Fut7;Galnt14;Pigz;Galnt18;Galnt5;
GO:0019112	62	10	2.90184	3.44609	0.0013613	0.0132499	molecular_function:phenanthrol glycosyltransferase activity	Galntl6;B4galt1;Galnt2;Galnt15;Wbscr17;Fut7;Galnt14;Pigz;Galnt18;Galnt5;
GO:0019187	62	10	2.90184	3.44609	0.0013613	0.0132499	molecular_function:beta-1,4-mannosyltransferase activity	Galntl6;B4galt1;Galnt2;Galnt15;Wbscr17;Fut7;Galnt14;Pigz;Galnt18;Galnt5;
GO:0031278	62	10	2.90184	3.44609	0.0013613	0.0132499	molecular_function:alpha-1,2-galactosyltransferase activity	Galntl6;B4galt1;Galnt2;Galnt15;Wbscr17;Fut7;Galnt14;Pigz;Galnt18;Galnt5;
GO:0033556	62	10	2.90184	3.44609	0.0013613	0.0132499	molecular_function:dolichyl pyrophosphate Man7GlcNAc2 alpha-1,3-glucosyltransferase activity	Galntl6;B4galt1;Galnt2;Galnt15;Wbscr17;Fut7;Galnt14;Pigz;Galnt18;Galnt5;
GO:0035496	62	10	2.90184	3.44609	0.0013613	0.0132499	molecular_function:lipopolysaccharide-1,5-galactosyltransferase activity	Galntl6;B4galt1;Galnt2;Galnt15;Wbscr17;Fut7;Galnt14;Pigz;Galnt18;Galnt5;
GO:0042283	62	10	2.90184	3.44609	0.0013613	0.0132499	molecular_function:dolichyl pyrophosphate Glc1Man9GlcNAc2 alpha-1,3-glucosyltransferase activity	Galntl6;B4galt1;Galnt2;Galnt15;Wbscr17;Fut7;Galnt14;Pigz;Galnt18;Galnt5;
GO:0045140	62	10	2.90184	3.44609	0.0013613	0.0132499	molecular_function:inositol phosphoceramide synthase activity	Galntl6;B4galt1;Galnt2;Galnt15;Wbscr17;Fut7;Galnt14;Pigz;Galnt18;Galnt5;
GO:0046920	62	10	2.90184	3.44609	0.0013613	0.0132499	molecular_function:alpha-(1->3)-fucosyltransferase activity	Galntl6;B4galt1;Galnt2;Galnt15;Wbscr17;Fut7;Galnt14;Pigz;Galnt18;Galnt5;
GO:0052638	62	10	2.90184	3.44609	0.0013613	0.0132499	molecular_function:indole-3-butyrate beta-glucosyltransferase activity	Galntl6;B4galt1;Galnt2;Galnt15;Wbscr17;Fut7;Galnt14;Pigz;Galnt18;Galnt5;
GO:0052639	62	10	2.90184	3.44609	0.0013613	0.0132499	molecular_function:salicylic acid glucosyltransferase (ester-forming) activity	Galntl6;B4galt1;Galnt2;Galnt15;Wbscr17;Fut7;Galnt14;Pigz;Galnt18;Galnt5;
GO:0052640	62	10	2.90184	3.44609	0.0013613	0.0132499	molecular_function:salicylic acid glucosyltransferase (glucoside-forming) activity	Galntl6;B4galt1;Galnt2;Galnt15;Wbscr17;Fut7;Galnt14;Pigz;Galnt18;Galnt5;
GO:0052641	62	10	2.90184	3.44609	0.0013613	0.0132499	molecular_function:benzoic acid glucosyltransferase activity	Galntl6;B4galt1;Galnt2;Galnt15;Wbscr17;Fut7;Galnt14;Pigz;Galnt18;Galnt5;
GO:0052757	62	10	2.90184	3.44609	0.0013613	0.0132499	molecular_function:chondroitin hydrolase activity	Galntl6;B4galt1;Galnt2;Galnt15;Wbscr17;Fut7;Galnt14;Pigz;Galnt18;Galnt5;
GO:0052824	62	10	2.90184	3.44609	0.0013613	0.0132499	molecular_function:dolichyl-pyrophosphate Man7GlcNAc2 alpha-1,6-mannosyltransferase activity	Galntl6;B4galt1;Galnt2;Galnt15;Wbscr17;Fut7;Galnt14;Pigz;Galnt18;Galnt5;
GO:0080062	62	10	2.90184	3.44609	0.0013613	0.0132499	molecular_function:cytokinin 9-beta-glucosyltransferase activity	Galntl6;B4galt1;Galnt2;Galnt15;Wbscr17;Fut7;Galnt14;Pigz;Galnt18;Galnt5;
GO:0004402	41	8	1.91896	4.16893	0.00140151	0.0135572	molecular_function:histone acetyltransferase activity	Sap130;Ncoa1;Elp3;Ncoa2;Kat2b;Mettl8;Tada1;Crebbp;
GO:0010811	41	8	1.91896	4.16893	0.00140151	0.0135572	biological_process:positive regulation of cell-substrate adhesion	Abi3bp;Prkce;Itga3;Smoc1;Lims1;Ptn;Fbln2;Col26a1;
GO:0031397	41	8	1.91896	4.16893	0.00140151	0.0135572	biological_process:negative regulation of protein ubiquitination	Hdac8;Prkce;Nxn;Klhl40;Ogt;Usp4;Fyn;Gclc;
GO:0046676	41	8	1.91896	4.16893	0.00140151	0.0135572	biological_process:negative regulation of insulin secretion	Pde1c;Oit1;Kcnq1;Ppp3ca;Rptor;Park2;Kcnb1;Hadh;
GO:0048365	41	8	1.91896	4.16893	0.00140151	0.0135572	molecular_function:Rac GTPase binding	Rab7;Srgap1;Eps8;Farp1;Srgap2;Iqgap1;Rcc2;Hace1;
GO:0009790	74	11	3.46348	3.17599	0.00144662	0.0139762	biological_process:embryo development	Foxp2;Foxp1;Wnt5a;Tpm1;Tgfbr3;Acvr1b;Ehmt1;Slc9a1;Gtf2ird1;Racgap1;Slc4a8;
GO:0003857	8	4	0.374431	10.6829	0.00148436	0.0140638	molecular_function:3-hydroxyacyl-CoA dehydrogenase activity	Hadha;Hadhb;Hadh;Cryl1;
GO:0008046	8	4	0.374431	10.6829	0.00148436	0.0140638	molecular_function:axon guidance receptor activity	Robo1;Ephb1;Robo2;Ephb2;
GO:0008429	8	4	0.374431	10.6829	0.00148436	0.0140638	molecular_function:phosphatidylethanolamine binding	Cd300a;Nf1;Anxa11;Esyt2;
GO:0010863	8	4	0.374431	10.6829	0.00148436	0.0140638	biological_process:positive regulation of phospholipase C activity	Flt1;Pdgfra;Abl2;Fgfr1;
GO:0010960	8	4	0.374431	10.6829	0.00148436	0.0140638	biological_process:magnesium ion homeostasis	Cnnm2;Tfap2b;Mtss1;Ank3;
GO:0030823	8	4	0.374431	10.6829	0.00148436	0.0140638	biological_process:obsolete regulation of cGMP metabolic process	Aipl1;Cbs;Pde5a;Pde2a;
GO:0032591	8	4	0.374431	10.6829	0.00148436	0.0140638	cellular_component:dendritic spine membrane	Shisa9;Gria1;Atp2b1;Ppp1r9b;
GO:0032872	8	4	0.374431	10.6829	0.00148436	0.0140638	biological_process:regulation of stress-activated MAPK cascade	Map2k2;Gstp1;Mapk1;Map2k1;
GO:0036157	8	4	0.374431	10.6829	0.00148436	0.0140638	cellular_component:outer dynein arm	Ccdc114;Dnal1;Dnah8;Dnah17;
GO:0046069	8	4	0.374431	10.6829	0.00148436	0.0140638	biological_process:cGMP catabolic process	Pde5a;Pde10a;Pde2a;Pde1c;
GO:0060012	8	4	0.374431	10.6829	0.00148436	0.0140638	biological_process:synaptic transmission, glycinergic	Glra3;Glra1;Slc6a5;Glrb;
GO:0061037	8	4	0.374431	10.6829	0.00148436	0.0140638	biological_process:negative regulation of cartilage development	Rara;Tgfb2;Rarb;Wnt9a;
GO:0071514	8	4	0.374431	10.6829	0.00148436	0.0140638	biological_process:genetic imprinting	Nespas;a;Meg3;Gnas;
GO:0090286	8	4	0.374431	10.6829	0.00148436	0.0140638	biological_process:cytoskeletal anchoring at nuclear membrane	Syne1;Sun1;Spag4;Syne2;
GO:0097264	8	4	0.374431	10.6829	0.00148436	0.0140638	biological_process:self proteolysis	Tenm2;Capn3;Tenm4;Tenm3;
GO:1900744	8	4	0.374431	10.6829	0.00148436	0.0140638	biological_process:regulation of p38MAPK cascade	Phlpp1;Hgf;Ulk4;Dab2ip;
GO:0016409	52	9	2.4338	3.69792	0.0015137	0.0142149	molecular_function:palmitoyltransferase activity	Ykt6;Lpgat1;Pnpla3;Zdhhc8;Nat6;Zdhhc14;Zdhhc17;Hhat;Mboat2;
GO:0048538	52	9	2.4338	3.69792	0.0015137	0.0142149	biological_process:thymus development	Map2k1;Bcl11b;Mad1l1;Mapk1;Raf1;Map2k2;Pbx1;Nfatc3;Crkl;
GO:0060348	52	9	2.4338	3.69792	0.0015137	0.0142149	biological_process:bone development	Rara;Mmp14;Cadm1;Rarb;Sulf1;Gnas;Setdb1;Ift172;Mcph1;
GO:0097110	52	9	2.4338	3.69792	0.0015137	0.0142149	molecular_function:scaffold protein binding	Ryr2;Scn5a;Kcnq1;Nlgn3;Mdm2;Nlrp1a;Map2k2;Shank1;Dlg4;
GO:0003980	63	10	2.94864	3.39139	0.0015148	0.0142149	molecular_function:UDP-glucose:glycoprotein glucosyltransferase activity	Galntl6;B4galt1;Galnt2;Galnt15;Wbscr17;Fut7;Galnt14;Pigz;Galnt18;Galnt5;
GO:0004583	63	10	2.94864	3.39139	0.0015148	0.0142149	molecular_function:dolichyl-phosphate-glucose-glycolipid alpha-glucosyltransferase activity	Galntl6;B4galt1;Galnt2;Galnt15;Wbscr17;Fut7;Galnt14;Pigz;Galnt18;Galnt5;
GO:0032880	63	10	2.94864	3.39139	0.0015148	0.0142149	biological_process:regulation of protein localization	Tbc1d1;Plekhm2;Ptch1;Ttc8;Wnt5a;Celsr3;Wnt8a;Akt1;Rabgap1l;Myo5b;
GO:0046921	63	10	2.94864	3.39139	0.0015148	0.0142149	molecular_function:alpha-(1->6)-fucosyltransferase activity	Galntl6;B4galt1;Galnt2;Galnt15;Wbscr17;Fut7;Galnt14;Pigz;Galnt18;Galnt5;
GO:0005251	32	7	1.49772	4.67376	0.00156232	0.0144649	molecular_function:delayed rectifier potassium channel activity	Kcnq2;Kcnq4;Kcnc4;Kcnh1;Kcnb1;Kcnq5;Kcnq1;
GO:0007254	32	7	1.49772	4.67376	0.00156232	0.0144649	biological_process:JNK cascade	Map3k13;Ror2;Wnt5a;Map3k5;Nphs1;Ptk2;Fgf12;
GO:0048663	32	7	1.49772	4.67376	0.00156232	0.0144649	biological_process:neuron fate commitment	Runx1;Zfp521;Notch3;Tgfb2;Pax7;Gli3;Smad4;
GO:0001954	23	6	1.07649	5.57368	0.00156552	0.0144649	biological_process:positive regulation of cell-matrix adhesion	Ptprj;Itgb3;Cdh13;Ptk2b;Cdk6;Disc1;
GO:0004675	23	6	1.07649	5.57368	0.00156552	0.0144649	molecular_function:transmembrane receptor protein serine/threonine kinase activity	Adck5;Alpk1;Alpk3;Acvr1b;Bmpr1b;Adrbk2;
GO:0005246	23	6	1.07649	5.57368	0.00156552	0.0144649	molecular_function:calcium channel regulator activity	Cacna2d3;Sgk3;Stim1;Nrxn2;Cacna2d4;Cacnb2;
GO:0006904	23	6	1.07649	5.57368	0.00156552	0.0144649	biological_process:vesicle docking involved in exocytosis	Scfd2;Ykt6;Stxbp3;Kcnb1;Exoc6b;Exoc4;
GO:0043542	23	6	1.07649	5.57368	0.00156552	0.0144649	biological_process:endothelial cell migration	Cdh13;Itgb2;Dpp4;Ptk2;Ptp4a3;Stard13;
GO:0048593	23	6	1.07649	5.57368	0.00156552	0.0144649	biological_process:camera-type eye morphogenesis	Ephb1;Mfn2;Tenm3;Nf1;Gli3;Ephb2;
GO:0048814	23	6	1.07649	5.57368	0.00156552	0.0144649	biological_process:regulation of dendrite morphogenesis	Tnik;Sema4d;Sipa1l1;Syne1;Robo1;Rap2a;
GO:0004012	15	5	0.702058	7.12192	0.00158017	0.0144649	molecular_function:phospholipid-translocating ATPase activity	Atp11a;Atp8b4;Atp9a;Atp8a1;Atp8a2;
GO:0004694	15	5	0.702058	7.12192	0.00158017	0.0144649	molecular_function:eukaryotic translation initiation factor 2alpha kinase activity	Alpk1;Eif2ak2;Alpk3;Adck5;Adrbk2;
GO:0007202	15	5	0.702058	7.12192	0.00158017	0.0144649	biological_process:activation of phospholipase C activity	Txk;Gnaq;Ang;Adcyap1r1;Dlc1;
GO:0008179	15	5	0.702058	7.12192	0.00158017	0.0144649	molecular_function:adenylate cyclase binding	Akap12;Gria1;Adcyap1r1;Cap2;Adcy2;
GO:0008349	15	5	0.702058	7.12192	0.00158017	0.0144649	molecular_function:MAP kinase kinase kinase kinase activity	Alpk1;Map4k1;Alpk3;Adck5;Adrbk2;
GO:0022891	15	5	0.702058	7.12192	0.00158017	0.0144649	molecular_function:transmembrane transporter activity	Slc2a10;Slc2a13;Slc2a8;Slc2a1;Slc22a13;
GO:0030955	15	5	0.702058	7.12192	0.00158017	0.0144649	molecular_function:potassium ion binding	Slc24a3;Pdxk;Slc24a2;Hdac4;Kcnj1;
GO:0033268	15	5	0.702058	7.12192	0.00158017	0.0144649	cellular_component:node of Ranvier	Kcnq2;Ank3;Scn8a;Bin1;Spock1;
GO:0035909	15	5	0.702058	7.12192	0.00158017	0.0144649	biological_process:aorta morphogenesis	Chd7;Tfap2b;Eya1;Tbx2;Nprl3;
GO:0050773	15	5	0.702058	7.12192	0.00158017	0.0144649	biological_process:regulation of dendrite development	Prex1;Rapgef4;Kalrn;Ntrk2;Camk1d;
GO:0051571	15	5	0.702058	7.12192	0.00158017	0.0144649	biological_process:positive regulation of histone H3-K4 methylation	Dnmt1;Nelfa;Auts2;Ogt;Smad4;
GO:0045665	75	11	3.51029	3.13365	0.00159249	0.0145607	biological_process:negative regulation of neuron differentiation	Hmg20a;Trp73;Mib1;Mag;Pbx1;Gli3;Casz1;Lsm1;Eif4enif1;Notch3;Zfp536;
GO:0046426	42	8	1.96576	4.06967	0.00160363	0.0145963	biological_process:negative regulation of JAK-STAT cascade	Rtn4rl2;Lrrtm4;Podn;Ptprd;Gp1ba;Rtn4rl1;Dab1;Lrrc15;
GO:0090002	42	8	1.96576	4.06967	0.00160363	0.0145963	biological_process:protein localization to plasma membrane	Ttc8;Ttc7b;Cacnb2;Ttc7;Ezr;Tspan14;Lama5;Pacsin1;
GO:0000822	3	3	0.140412	21.3657	0.00161685	0.0145963	molecular_function:inositol hexakisphosphate binding	Xpr1;Gle1;Itpr3;
GO:0005220	3	3	0.140412	21.3657	0.00161685	0.0145963	molecular_function:inositol 1,4,5-trisphosphate-sensitive calcium-release channel activity	Itpr2;Itpr1;Itpr3;
GO:0008105	3	3	0.140412	21.3657	0.00161685	0.0145963	biological_process:protein localization	Dync2h1;Wnt7a;Scrib;
GO:0034702	3	3	0.140412	21.3657	0.00161685	0.0145963	cellular_component:ion channel complex	Lrrc8a;Catsperb;Kcnq1;
GO:0035609	3	3	0.140412	21.3657	0.00161685	0.0145963	biological_process:C-terminal protein deglutamylation	Agtpbp1;Agbl1;Agbl4;
GO:0061005	3	3	0.140412	21.3657	0.00161685	0.0145963	biological_process:cell differentiation involved in kidney development	Glis2;Ptch1;Gli3;
GO:0086045	3	3	0.140412	21.3657	0.00161685	0.0145963	biological_process:membrane depolarization during AV node cell action potential	Cacna1c;Cacnb2;Scn5a;
GO:1902036	3	3	0.140412	21.3657	0.00161685	0.0145963	biological_process:regulation of hematopoietic stem cell differentiation	Eif2ak2;Cdk6;Ap2a2;
GO:1903829	3	3	0.140412	21.3657	0.00161685	0.0145963	biological_process:positive regulation of cellular protein localization	Cyld;Ppp1r9b;Iqgap1;
GO:0001664	64	10	2.99545	3.3384	0.00168205	0.0151326	molecular_function:G protein-coupled receptor binding	Gna12;Gna11;Rspo1;Arhgef11;Gna14;Gna13;Fyn;Pomc;Gnaq;Park2;
GO:0001962	64	10	2.99545	3.3384	0.00168205	0.0151326	molecular_function:alpha-1,3-galactosyltransferase activity	Galntl6;B4galt1;Galnt2;Galnt15;Wbscr17;Fut7;Galnt14;Pigz;Galnt18;Galnt5;
GO:0004576	64	10	2.99545	3.3384	0.00168205	0.0151326	molecular_function:oligosaccharyl transferase activity	Galntl6;B4galt1;Galnt2;Galnt15;Wbscr17;Fut7;Galnt14;Pigz;Galnt18;Galnt5;
GO:1901215	53	9	2.4806	3.62815	0.00170118	0.0152872	biological_process:negative regulation of neuron death	Tmem259;Lrrk2;Ppargc1a;Sorl1;Park2;Itpr1;Ppara;Ppp5c;Crhr1;
GO:0019905	76	11	3.55709	3.09241	0.00175017	0.0157094	molecular_function:syntaxin binding	Syt14;Cplx2;Syt2;Stxbp3;Syt11;Syt1;Txlnb;Syt7;Syt17;Cacna1a;Sptan1;
GO:0030501	33	7	1.54453	4.53213	0.0018212	0.0162726	biological_process:positive regulation of bone mineralization	Fbn2;Bmp6;Cd276;Gpm6b;Smad3;Bmpr1b;Mef2c;
GO:0031226	33	7	1.54453	4.53213	0.0018212	0.0162726	cellular_component:intrinsic component of plasma membrane	Pdgfra;Tgm2;Slc24a2;Xpr1;Cd6;Prima1;Crhr1;
GO:0036126	33	7	1.54453	4.53213	0.0018212	0.0162726	cellular_component:sperm flagellum	Tekt4;Ak8;Rsph1;Dnah1;Abhd2;Catsper2;Atp2b4;
GO:0048568	33	7	1.54453	4.53213	0.0018212	0.0162726	biological_process:embryonic organ development	Wnt7b;Ptch1;Rbbp6;Wdpcp;Pbx1;Mkl2;Gli3;
GO:0008543	43	8	2.01256	3.97503	0.00182811	0.0162972	biological_process:fibroblast growth factor receptor signaling pathway	Fgf17;Sos1;Fgfr1;Fgf9;Iqgap1;Trim71;Fgfr4;Fgf12;
GO:0032720	43	8	2.01256	3.97503	0.00182811	0.0162972	biological_process:negative regulation of tumor necrosis factor production	Gstp1;Rara;Zc3h12a;Trim27;Pomc;Gas6;Ptpn22;Twist2;
GO:0046527	65	10	3.04225	3.28704	0.00186392	0.0165975	molecular_function:glucosyltransferase activity	Galntl6;B4galt1;Galnt2;Galnt15;Wbscr17;Fut7;Galnt14;Pigz;Galnt18;Galnt5;
GO:0005795	24	6	1.12329	5.34144	0.00188333	0.0166946	cellular_component:Golgi stack	Uso1;Ica1;Galnt2;Gbf1;Mbtps1;March4;
GO:0009409	24	6	1.12329	5.34144	0.00188333	0.0166946	biological_process:response to cold	Slc27a1;Zfp516;Lrp11;Acot11;P2rx3;Thra;
GO:0030552	24	6	1.12329	5.34144	0.00188333	0.0166946	molecular_function:cAMP binding	Pde10a;Prkar1a;Prkar1b;Pde1c;Rapgef4;Pde2a;
GO:0031988	24	6	1.12329	5.34144	0.00188333	0.0166946	cellular_component:vesicle	Ggt1;Bmp6;Bglap3;Slc47a1;Bmp1;Ywhag;
GO:0007009	16	5	0.748861	6.67681	0.00199793	0.0175912	biological_process:plasma membrane organization	Mtss1;Baiap2l1;Ank3;Baiap2;Baiap2l2;
GO:0008307	16	5	0.748861	6.67681	0.00199793	0.0175912	molecular_function:structural constituent of muscle	Jph1;Capn3;Synm;Ttn;Myh11;
GO:0015026	16	5	0.748861	6.67681	0.00199793	0.0175912	molecular_function:coreceptor activity	Cd22;Hfe2;Ackr3;Ramp1;Tgfbr3;
GO:0050730	16	5	0.748861	6.67681	0.00199793	0.0175912	biological_process:regulation of peptidyl-tyrosine phosphorylation	Prkce;Prkca;Itgb2;Pdgfd;Egf;
GO:0072358	16	5	0.748861	6.67681	0.00199793	0.0175912	biological_process:cardiovascular system development	Wdpcp;Nxn;Foxp1;Kcnq1;Kcnj1;
GO:0097458	16	5	0.748861	6.67681	0.00199793	0.0175912	cellular_component:neuron part	Bcl11b;Pcdh9;Aatk;Rbfox3;Grik4;
GO:0008417	66	10	3.08905	3.23724	0.00206132	0.0180684	molecular_function:fucosyltransferase activity	Galntl6;B4galt1;Galnt2;Galnt15;Wbscr17;Fut7;Galnt14;Pigz;Galnt18;Galnt5;
GO:0032088	66	10	3.08905	3.23724	0.00206132	0.0180684	biological_process:negative regulation of NF-kappaB transcription factor activity	Commd1;Map2k5;Cyld;Tceal7;Zc3h12a;Irak2;Commd6;Dab2ip;Tlr9;Nlrc5;
GO:0009101	9	4	0.421235	9.49589	0.00206825	0.0180684	biological_process:glycoprotein biosynthetic process	Tnip1;B4galt1;Gcnt1;Gal3st2;
GO:0015816	9	4	0.421235	9.49589	0.00206825	0.0180684	biological_process:glycine transport	Slc36a3;Slc6a17;Slc36a2;Slc6a5;
GO:0021707	9	4	0.421235	9.49589	0.00206825	0.0180684	biological_process:cerebellar granule cell differentiation	Nfix;Atp2b2;Wnt7a;Ulk1;
GO:0071872	9	4	0.421235	9.49589	0.00206825	0.0180684	biological_process:cellular response to epinephrine stimulus	Slc9a1;Ryr2;Atp2b4;Pde4d;
GO:0090394	9	4	0.421235	9.49589	0.00206825	0.0180684	biological_process:negative regulation of excitatory postsynaptic potential	Celf4;Park2;Lrrk2;Nlgn3;
GO:0061630	191	20	8.93953	2.23725	0.00208298	0.0181769	molecular_function:ubiquitin protein ligase activity	Trim32;Ube2v1;Lrsam1;Neurl1a;Rnf180;Asb2;Rnf165;Ccnc;Mgrn1;Wwp2;Kcmf1;Rnf149;Rbbp6;Fancl;Rnf220;Pdzrn3;Arih2;Mdm2;Trim71;Park2;
GO:0000910	34	7	1.59133	4.39884	0.00211213	0.0184107	biological_process:cytokinesis	Map9;Rab11fip4;Klhl13;Incenp;Rab11fip3;Zfyve26;Ist1;
GO:0048704	55	9	2.57421	3.49622	0.00213174	0.0185611	biological_process:embryonic skeletal system morphogenesis	Tbx15;Zeb1;Wnt9a;Chst11;Dscaml1;Eya1;Asxl2;Gli3;Mef2c;
GO:0000252	25	6	1.1701	5.12778	0.00224762	0.0188583	molecular_function:C-3 sterol dehydrogenase (C-4 sterol decarboxylase) activity	Kcnab2;Kcnab1;Sdr9c7;Wwox;Sdr42e1;Ctbp1;
GO:0004112	25	6	1.1701	5.12778	0.00224762	0.0188583	molecular_function:cyclic-nucleotide phosphodiesterase activity	Pde10a;Enpp6;Pde1c;Pde5a;Pde4d;Pde2a;
GO:0004117	25	6	1.1701	5.12778	0.00224762	0.0188583	molecular_function:calmodulin-dependent cyclic-nucleotide phosphodiesterase activity	Pde10a;Enpp6;Pde1c;Pde5a;Pde4d;Pde2a;
GO:0004118	25	6	1.1701	5.12778	0.00224762	0.0188583	molecular_function:cGMP-stimulated cyclic-nucleotide phosphodiesterase activity	Pde10a;Enpp6;Pde1c;Pde5a;Pde4d;Pde2a;
GO:0004119	25	6	1.1701	5.12778	0.00224762	0.0188583	molecular_function:cGMP-inhibited cyclic-nucleotide phosphodiesterase activity	Pde10a;Enpp6;Pde1c;Pde5a;Pde4d;Pde2a;
GO:0004120	25	6	1.1701	5.12778	0.00224762	0.0188583	molecular_function:photoreceptor cyclic-nucleotide phosphodiesterase activity	Pde10a;Enpp6;Pde1c;Pde5a;Pde4d;Pde2a;
GO:0004495	25	6	1.1701	5.12778	0.00224762	0.0188583	molecular_function:mevaldate reductase activity	Kcnab2;Kcnab1;Sdr9c7;Wwox;Sdr42e1;Ctbp1;
GO:0008875	25	6	1.1701	5.12778	0.00224762	0.0188583	molecular_function:gluconate dehydrogenase activity	Kcnab2;Kcnab1;Sdr9c7;Wwox;Sdr42e1;Ctbp1;
GO:0018451	25	6	1.1701	5.12778	0.00224762	0.0188583	molecular_function:epoxide dehydrogenase activity	Kcnab2;Kcnab1;Sdr9c7;Wwox;Sdr42e1;Ctbp1;
GO:0018452	25	6	1.1701	5.12778	0.00224762	0.0188583	molecular_function:5-exo-hydroxycamphor dehydrogenase activity	Kcnab2;Kcnab1;Sdr9c7;Wwox;Sdr42e1;Ctbp1;
GO:0018453	25	6	1.1701	5.12778	0.00224762	0.0188583	molecular_function:2-hydroxytetrahydrofuran dehydrogenase activity	Kcnab2;Kcnab1;Sdr9c7;Wwox;Sdr42e1;Ctbp1;
GO:0019152	25	6	1.1701	5.12778	0.00224762	0.0188583	molecular_function:acetoin dehydrogenase activity	Kcnab2;Kcnab1;Sdr9c7;Wwox;Sdr42e1;Ctbp1;
GO:0030878	25	6	1.1701	5.12778	0.00224762	0.0188583	biological_process:thyroid gland development	Raf1;Map2k1;Map2k2;Thra;Mapk1;Smad3;
GO:0031369	25	6	1.1701	5.12778	0.00224762	0.0188583	molecular_function:translation initiation factor binding	Cacna1c;Trim32;Syt11;Larp1;Eif3c;Gle1;
GO:0032442	25	6	1.1701	5.12778	0.00224762	0.0188583	molecular_function:phenylcoumaran benzylic ether reductase activity	Kcnab2;Kcnab1;Sdr9c7;Wwox;Sdr42e1;Ctbp1;
GO:0032866	25	6	1.1701	5.12778	0.00224762	0.0188583	molecular_function:D-xylose:NADP reductase activity	Kcnab2;Kcnab1;Sdr9c7;Wwox;Sdr42e1;Ctbp1;
GO:0032867	25	6	1.1701	5.12778	0.00224762	0.0188583	molecular_function:L-arabinose:NADP reductase activity	Kcnab2;Kcnab1;Sdr9c7;Wwox;Sdr42e1;Ctbp1;
GO:0033709	25	6	1.1701	5.12778	0.00224762	0.0188583	molecular_function:D-arabinitol dehydrogenase, D-ribulose forming (NADP+) activity	Kcnab2;Kcnab1;Sdr9c7;Wwox;Sdr42e1;Ctbp1;
GO:0033764	25	6	1.1701	5.12778	0.00224762	0.0188583	molecular_function:steroid dehydrogenase activity, acting on the CH-OH group of donors, NAD or NADP as acceptor	Kcnab2;Kcnab1;Sdr9c7;Wwox;Sdr42e1;Ctbp1;
GO:0033765	25	6	1.1701	5.12778	0.00224762	0.0188583	molecular_function:steroid dehydrogenase activity, acting on the CH-CH group of donors	Kcnab2;Kcnab1;Sdr9c7;Wwox;Sdr42e1;Ctbp1;
GO:0034831	25	6	1.1701	5.12778	0.00224762	0.0188583	molecular_function:(R)-(-)-1,2,3,4-tetrahydronaphthol dehydrogenase activity	Kcnab2;Kcnab1;Sdr9c7;Wwox;Sdr42e1;Ctbp1;
GO:0034840	25	6	1.1701	5.12778	0.00224762	0.0188583	molecular_function:3-hydroxymenthone dehydrogenase activity	Kcnab2;Kcnab1;Sdr9c7;Wwox;Sdr42e1;Ctbp1;
GO:0035380	25	6	1.1701	5.12778	0.00224762	0.0188583	molecular_function:very long-chain-3-hydroxyacyl-CoA dehydrogenase activity	Kcnab2;Kcnab1;Sdr9c7;Wwox;Sdr42e1;Ctbp1;
GO:0043713	25	6	1.1701	5.12778	0.00224762	0.0188583	molecular_function:(R)-2-hydroxyisocaproate dehydrogenase activity	Kcnab2;Kcnab1;Sdr9c7;Wwox;Sdr42e1;Ctbp1;
GO:0044103	25	6	1.1701	5.12778	0.00224762	0.0188583	molecular_function:L-arabinose 1-dehydrogenase (NADP+) activity	Kcnab2;Kcnab1;Sdr9c7;Wwox;Sdr42e1;Ctbp1;
GO:0044105	25	6	1.1701	5.12778	0.00224762	0.0188583	molecular_function:L-xylulose reductase (NAD+) activity	Kcnab2;Kcnab1;Sdr9c7;Wwox;Sdr42e1;Ctbp1;
GO:0044688	25	6	1.1701	5.12778	0.00224762	0.0188583	molecular_function:7,8-dihydro-D-neopterin 2',3'-cyclic phosphate phosphodiesterase activity	Pde10a;Enpp6;Pde1c;Pde5a;Pde4d;Pde2a;
GO:0048258	25	6	1.1701	5.12778	0.00224762	0.0188583	molecular_function:3-ketoglucose-reductase activity	Kcnab2;Kcnab1;Sdr9c7;Wwox;Sdr42e1;Ctbp1;
GO:0050790	25	6	1.1701	5.12778	0.00224762	0.0188583	biological_process:regulation of catalytic activity	Ttn;Ppp4r1;Arhgef15;Fxyd3;Capn3;Rnf180;
GO:0052677	25	6	1.1701	5.12778	0.00224762	0.0188583	molecular_function:D-arabinitol dehydrogenase, D-xylulose forming (NADP+) activity	Kcnab2;Kcnab1;Sdr9c7;Wwox;Sdr42e1;Ctbp1;
GO:0052712	25	6	1.1701	5.12778	0.00224762	0.0188583	molecular_function:inositol phosphosphingolipid phospholipase activity	Pde10a;Enpp6;Pde1c;Pde5a;Pde4d;Pde2a;
GO:0052713	25	6	1.1701	5.12778	0.00224762	0.0188583	molecular_function:inositol phosphorylceramide phospholipase activity	Pde10a;Enpp6;Pde1c;Pde5a;Pde4d;Pde2a;
GO:0052714	25	6	1.1701	5.12778	0.00224762	0.0188583	molecular_function:mannosyl-inositol phosphorylceramide phospholipase activity	Pde10a;Enpp6;Pde1c;Pde5a;Pde4d;Pde2a;
GO:0052715	25	6	1.1701	5.12778	0.00224762	0.0188583	molecular_function:mannosyl-diinositol phosphorylceramide phospholipase activity	Pde10a;Enpp6;Pde1c;Pde5a;Pde4d;Pde2a;
GO:0045669	67	10	3.13586	3.18892	0.00227521	0.0190694	biological_process:positive regulation of osteoblast differentiation	Fbn2;Bmp6;Gnas;Lmna;Runx2;Gli3;Wnt7b;Cd276;Bmpr1b;Mef2c;
GO:0016049	45	8	2.10617	3.79836	0.002351	0.0196417	biological_process:cell growth	Itgb3;Tgfbr3;Tgfb2;Cacna1a;Sec61a1;Sgms1;Adra1b;Rptor;
GO:0032947	45	8	2.10617	3.79836	0.002351	0.0196417	molecular_function:protein-containing complex scaffold activity	Mpp7;Capn3;Itsn1;Disc1;Map2k2;Wwc1;Magi2;Magi1;
GO:0043473	45	8	2.10617	3.79836	0.002351	0.0196417	biological_process:pigmentation	a;Szt2;Fig4;Kit;Nf1;Oca2;Eda;Rab27a;
GO:0005881	56	9	2.62101	3.43378	0.00237732	0.0197774	cellular_component:cytoplasmic microtubule	Mid1;Mtus2;Bcas3;Cyld;Clip2;Ss18;Clmp;Gtse1;Dcxr;
GO:0042147	56	9	2.62101	3.43378	0.00237732	0.0197774	biological_process:retrograde transport, endosome to Golgi	Ykt6;Rab7;Ric1;Dennd2a;Gbf1;Rab6b;Vps26a;Trim27;Erc1;
GO:0045668	56	9	2.62101	3.43378	0.00237732	0.0197774	biological_process:negative regulation of osteoblast differentiation	Ptch1;Mir338;Hdac4;Cdk6;Fgfr1;Sema4d;Twist2;Smad3;Nfatc1;
GO:0048839	56	9	2.62101	3.43378	0.00237732	0.0197774	biological_process:inner ear development	Cdh23;Atp2b2;Lgr5;Kcnq1;Myo7a;Ccm2;Pcdh15;Gli3;Myo6;
GO:0043491	35	7	1.63813	4.27316	0.00243766	0.0202364	biological_process:protein kinase B signaling	Lingo1;Them4;Pax2;Akt1;Pik3c2b;Epha2;Gas6;
GO:0060079	35	7	1.63813	4.27316	0.00243766	0.0202364	biological_process:excitatory postsynaptic potential	Lrrk2;Nlgn3;Dgki;Ppp3ca;Grik5;Atxn1;Mef2c;
GO:0001841	17	5	0.795665	6.28405	0.00249087	0.0203976	biological_process:neural tube formation	Mib1;Ptch1;Ift172;Tctn1;Stk3;
GO:0005229	17	5	0.795665	6.28405	0.00249087	0.0203976	molecular_function:intracellular calcium activated chloride channel activity	Ano7;Clca3a1;Ano4;Ano1;Ano9;
GO:0005234	17	5	0.795665	6.28405	0.00249087	0.0203976	molecular_function:extracellularly glutamate-gated ion channel activity	Gria1;Grid1;Grik5;Grik3;Grik4;
GO:0010633	17	5	0.795665	6.28405	0.00249087	0.0203976	biological_process:negative regulation of epithelial cell migration	Ptprr;Evl;Tgfbr3;Dab2ip;Ptprg;
GO:0035137	17	5	0.795665	6.28405	0.00249087	0.0203976	biological_process:hindlimb morphogenesis	Tfap2b;Ptch1;Zbtb16;Fmn1;Wnt7a;
GO:0035640	17	5	0.795665	6.28405	0.00249087	0.0203976	biological_process:exploration behavior	Lrrk2;Shank2;Abl2;Itga3;Chl1;
GO:0042594	17	5	0.795665	6.28405	0.00249087	0.0203976	biological_process:response to starvation	Atg7;Ulk1;Lrp11;Ddit3;Bcas3;
GO:0042800	17	5	0.795665	6.28405	0.00249087	0.0203976	molecular_function:histone methyltransferase activity (H3-K4 specific)	Kmt2c;Prdm9;Setd3;Ash2l;Whsc1l1;
GO:0044291	17	5	0.795665	6.28405	0.00249087	0.0203976	cellular_component:cell-cell contact zone	Pkp4;Nectin2;Pcdh9;Scrib;Baiap2l2;
GO:0046827	17	5	0.795665	6.28405	0.00249087	0.0203976	biological_process:positive regulation of protein export from nucleus	Gas6;Mdm2;Xpo4;Camk4;Ranbp3l;
GO:0048485	17	5	0.795665	6.28405	0.00249087	0.0203976	biological_process:sympathetic nervous system development	Plxna4;Tfap2b;Nf1;Erbb2;Gdnf;
GO:1900006	17	5	0.795665	6.28405	0.00249087	0.0203976	biological_process:positive regulation of dendrite development	Pacsin1;Lrp8;Dab2ip;Iqgap1;Cobl;
GO:2000573	17	5	0.795665	6.28405	0.00249087	0.0203976	biological_process:positive regulation of DNA biosynthetic process	Hgf;Fgfr4;Ptk2b;Ddx39b;Egf;
GO:0042493	139	16	6.50573	2.45937	0.00250654	0.0204832	biological_process:response to drug	Dnmt1;Hdac4;Ywhaz;Tgfb2;Vav3;Hadha;Dgcr2;Slco1a6;Myo6;Hadh;Gnas;Kcnk3;Ss18;Nfatc2;Ncam1;Gabrg3;
GO:0005884	68	10	3.18266	3.14202	0.00250655	0.0204832	cellular_component:actin filament	Palld;Vcl;Fmn1;Capzb;Cobl;Mark2;Dlc1;Myo9b;Fyn;Ezr;
GO:0051897	80	11	3.74431	2.93779	0.00251308	0.0205152	biological_process:positive regulation of protein kinase B signaling	Ptprj;Igf1r;Ngfr;Mst1r;Rara;Itsn1;Zp3;Gas6;Ptk2;Insr;Stk3;
GO:0070374	172	18	8.05026	2.23595	0.00254349	0.0207418	biological_process:positive regulation of ERK1 and ERK2 cascade	Cd74;Prkca;St5;Abl2;Pdgfd;Gas6;Itgb3;Ackr3;Sema7a;Ptpn22;Map2k2;Fgfr4;Fam150a;Pdgfra;Rara;Ptk2b;Map2k1;Scimp;
GO:0005905	57	9	2.66782	3.37354	0.00264482	0.021247	cellular_component:clathrin-coated pit	Ackr3;Ap4s1;Fnbp1;Trf;Itsn1;Lrp2;Ap2a2;Cdhr5;Myo6;
GO:0017053	57	9	2.66782	3.37354	0.00264482	0.021247	cellular_component:transcriptional repressor complex	Ctbp2;Hdac4;Elp2;Ctbp1;Sin3a;Prdm16;Zbtb16;Ywhab;Gli3;
GO:0045732	57	9	2.66782	3.37354	0.00264482	0.021247	biological_process:positive regulation of protein catabolic process	Rab7;Trim32;Oaz1;Dab2ip;Wnt5a;Nkd1;Atg7;Sorl1;Csnk2a1;
GO:0001658	46	8	2.15298	3.71579	0.00265292	0.021247	biological_process:branching involved in ureteric bud morphogenesis	Ptch1;Pax2;Eya1;Lama5;Gdnf;Pbx1;Gli3;Smad4;
GO:0050852	46	8	2.15298	3.71579	0.00265292	0.021247	biological_process:T cell receptor signaling pathway	Plcg1;Mapk1;Cd247;Fyn;Skap1;Ptpn22;Txk;Plcg2;
GO:0004115	26	6	1.2169	4.93056	0.0026625	0.021247	molecular_function:3',5'-cyclic-AMP phosphodiesterase activity	Pde10a;Enpp6;Pde1c;Pde5a;Pde4d;Pde2a;
GO:0006829	26	6	1.2169	4.93056	0.0026625	0.021247	biological_process:zinc ion transport	Slc30a2;Slc39a4;Slc30a10;Slc30a7;Slc39a8;Slc39a14;
GO:0007163	26	6	1.2169	4.93056	0.0026625	0.021247	biological_process:establishment or maintenance of cell polarity	Lims1;Syne2;Ctnna1;Stk25;Pard3;Cap2;
GO:0017134	26	6	1.2169	4.93056	0.0026625	0.021247	molecular_function:fibroblast growth factor binding	Itgb3;Scn5a;Tgfbr3;Smn1;Fgfr4;Fgfr1;
GO:0035410	26	6	1.2169	4.93056	0.0026625	0.021247	molecular_function:dihydrotestosterone 17-beta-dehydrogenase activity	Kcnab2;Kcnab1;Sdr9c7;Wwox;Sdr42e1;Ctbp1;
GO:0045859	26	6	1.2169	4.93056	0.0026625	0.021247	biological_process:regulation of protein kinase activity	Kidins220;Ttn;Prkar1a;Plce1;Prkar1b;Spdye4b;
GO:0045921	26	6	1.2169	4.93056	0.0026625	0.021247	biological_process:positive regulation of exocytosis	Pla2g6;Cadps2;Ncs1;Prkca;Unc13d;Rab27a;
GO:0086091	26	6	1.2169	4.93056	0.0026625	0.021247	biological_process:regulation of heart rate by cardiac conduction	Cacna1c;Scn5a;Cacna1d;Ctnna3;Cacnb2;Kcnq1;
GO:0006417	119	14	5.56966	2.51362	0.00266487	0.021247	biological_process:regulation of translation	Fam129a;Ctif;Eif4g3;Larp4b;Eif4e3;Gcn1l1;Neurl1a;Casc3;Mknk1;Dapk1;Rbm4b;Akt1;Igf2bp3;Cpeb1;
GO:0005741	141	16	6.59934	2.42448	0.00267501	0.021247	cellular_component:mitochondrial outer membrane	Aifm2;Rnf185;Hadhb;Tomm20l;Cstad;Hk2;Gpam;Mlxip;Acsl6;Tomm20;Ass1;Mfn2;Lrrk2;Fam73a;Ppp1cc;Ppp2r2b;
GO:0000972	4	3	0.187215	16.0244	0.00273516	0.021247	biological_process:transcription-dependent tethering of RNA polymerase II gene DNA at nuclear periphery	Rae1;Nup133;Ldb1;
GO:0002175	4	3	0.187215	16.0244	0.00273516	0.021247	biological_process:protein localization to paranode region of axon	Epb41l3;Cntnap1;Nfasc;
GO:0007442	4	3	0.187215	16.0244	0.00273516	0.021247	biological_process:hindgut morphogenesis	Wnt5a;Gli3;Gli2;
GO:0030546	4	3	0.187215	16.0244	0.00273516	0.021247	molecular_function:receptor activator activity	Ppargc1b;Prkce;Anxa2;
GO:0032909	4	3	0.187215	16.0244	0.00273516	0.021247	biological_process:regulation of transforming growth factor beta2 production	Smad3;Tgfb2;Smad4;
GO:0043533	4	3	0.187215	16.0244	0.00273516	0.021247	molecular_function:inositol 1,3,4,5 tetrakisphosphate binding	Syt2;Astn2;Itpr3;
GO:0046813	4	3	0.187215	16.0244	0.00273516	0.021247	biological_process:receptor-mediated virion attachment to host cell	Lrrc15;Gas6;Ace2;
GO:0051668	4	3	0.187215	16.0244	0.00273516	0.021247	biological_process:localization within membrane	Cnih3;Cnih2;Cdh13;
GO:0060024	4	3	0.187215	16.0244	0.00273516	0.021247	biological_process:rhythmic synaptic transmission	Cacna2d2;Nlgn3;Cacna1a;
GO:0061589	4	3	0.187215	16.0244	0.00273516	0.021247	biological_process:calcium activated phosphatidylserine scrambling	Ano7;Ano9;Ano4;
GO:0070100	4	3	0.187215	16.0244	0.00273516	0.021247	biological_process:negative regulation of chemokine-mediated signaling pathway	Padi2;Slit3;Robo1;
GO:0071141	4	3	0.187215	16.0244	0.00273516	0.021247	cellular_component:SMAD protein complex	Smad2;Smad3;Smad4;
GO:0071205	4	3	0.187215	16.0244	0.00273516	0.021247	biological_process:protein localization to juxtaparanode region of axon	Cntnap2;Epb41l3;Nfasc;
GO:0072108	4	3	0.187215	16.0244	0.00273516	0.021247	biological_process:positive regulation of mesenchymal to epithelial transition involved in metanephros morphogenesis	Lif;Gdnf;Pax2;
GO:0090170	4	3	0.187215	16.0244	0.00273516	0.021247	biological_process:regulation of Golgi inheritance	Mapk1;Map2k2;Map2k1;
GO:1901660	4	3	0.187215	16.0244	0.00273516	0.021247	biological_process:calcium ion export	Atp2b1;Atp2b2;Atp2b4;
GO:1902474	4	3	0.187215	16.0244	0.00273516	0.021247	biological_process:positive regulation of protein localization to synapse	Nlgn2;Clstn3;Nlgn3;
GO:1903265	4	3	0.187215	16.0244	0.00273516	0.021247	biological_process:positive regulation of tumor necrosis factor-mediated signaling pathway	Trim32;Park2;Traf2;
GO:2001013	4	3	0.187215	16.0244	0.00273516	0.021247	biological_process:epithelial cell proliferation involved in renal tubule morphogenesis	Mtss1;Mef2c;Lgr5;
GO:0008378	69	10	3.22946	3.09649	0.00275634	0.021247	molecular_function:galactosyltransferase activity	Galnt15;Galnt14;Pigz;Galntl6;B4galt1;Galnt2;Wbscr17;Fut7;Galnt18;Galnt5;
GO:0043433	69	10	3.22946	3.09649	0.00275634	0.021247	biological_process:negative regulation of DNA-binding transcription factor activity	Wwp2;Hdac4;Igf1r;Ddit3;Ptch1;Irak2;Pex14;Glis2;Gas6;Thra;
GO:0000983	10	4	0.468038	8.54631	0.00279333	0.021247	molecular_function:transcription factor activity, RNA polymerase II core promoter sequence-specific DNA binding	Tfap2b;Pax7;Smad3;Mef2c;
GO:0002098	10	4	0.468038	8.54631	0.00279333	0.021247	biological_process:tRNA wobble uridine modification	Ctu2;Alkbh8;Ikbkap;Elp3;
GO:0007270	10	4	0.468038	8.54631	0.00279333	0.021247	biological_process:neuron-neuron synaptic transmission	Camk4;Cacna1a;Dlgap2;Arid1b;
GO:0008239	10	4	0.468038	8.54631	0.00279333	0.021247	molecular_function:dipeptidyl-peptidase activity	Dpp4;Dpp3;Dpp10;Dpep2;
GO:0010762	10	4	0.468038	8.54631	0.00279333	0.021247	biological_process:regulation of fibroblast migration	Gna12;Fer;Rcc2;Wdpcp;
GO:0010941	10	4	0.468038	8.54631	0.00279333	0.021247	biological_process:regulation of cell death	Ywhaz;Ulk1;Ngfr;Map3k5;
GO:0015299	10	4	0.468038	8.54631	0.00279333	0.021247	molecular_function:solute:proton antiporter activity	Slc9a7;Slc9a1;Slc9a9;Slc9a8;
GO:0015385	10	4	0.468038	8.54631	0.00279333	0.021247	molecular_function:sodium:proton antiporter activity	Slc9a7;Slc9a1;Slc9a9;Slc9a8;
GO:0015386	10	4	0.468038	8.54631	0.00279333	0.021247	molecular_function:potassium:proton antiporter activity	Slc9a7;Slc9a1;Slc9a9;Slc9a8;
GO:0016247	10	4	0.468038	8.54631	0.00279333	0.021247	molecular_function:channel regulator activity	Cnih2;Cacng4;Cacng2;Cnih3;
GO:0035253	10	4	0.468038	8.54631	0.00279333	0.021247	cellular_component:ciliary rootlet	Klc3;Klc1;Kif5c;Crocc;
GO:0045806	10	4	0.468038	8.54631	0.00279333	0.021247	biological_process:negative regulation of endocytosis	Pacsin1;Scamp5;Lrsam1;Pacsin3;
GO:0055001	10	4	0.468038	8.54631	0.00279333	0.021247	biological_process:muscle cell development	Sgcz;Nfatc3;Sgcd;Cacna1s;
GO:0060484	10	4	0.468038	8.54631	0.00279333	0.021247	biological_process:lung-associated mesenchyme development	Fgf9;Ptk7;Wnt7b;Fgfr1;
GO:0071044	10	4	0.468038	8.54631	0.00279333	0.021247	biological_process:histone mRNA catabolic process	Papd5;Dcp2;Exosc10;Lsm1;
GO:0080111	10	4	0.468038	8.54631	0.00279333	0.021247	biological_process:DNA demethylation	Tet1;Fto;Apobec2;Tet3;
GO:2000188	10	4	0.468038	8.54631	0.00279333	0.021247	biological_process:cholesterol homeostasis	Nr1h2;Fgfr4;Rora;Raly;
GO:0001654	36	7	1.68494	4.15446	0.00280043	0.021247	biological_process:eye development	Bmp6;Smoc1;Tgfb2;Fgf9;Sipa1l3;Adamts18;Bmpr1b;
GO:0010296	36	7	1.68494	4.15446	0.00280043	0.021247	molecular_function:prenylcysteine methylesterase activity	Ces1b;Ces2g;Pnpla5;Nceh1;Ces2h;Dagla;Ddhd1;
GO:0018731	36	7	1.68494	4.15446	0.00280043	0.021247	molecular_function:1-oxa-2-oxocycloheptane lactonase activity	Ces1b;Ces2g;Pnpla5;Nceh1;Ces2h;Dagla;Ddhd1;
GO:0018732	36	7	1.68494	4.15446	0.00280043	0.021247	molecular_function:sulfolactone hydrolase activity	Ces1b;Ces2g;Pnpla5;Nceh1;Ces2h;Dagla;Ddhd1;
GO:0018734	36	7	1.68494	4.15446	0.00280043	0.021247	molecular_function:butyrolactone hydrolase activity	Ces1b;Ces2g;Pnpla5;Nceh1;Ces2h;Dagla;Ddhd1;
GO:0030513	36	7	1.68494	4.15446	0.00280043	0.021247	biological_process:positive regulation of BMP signaling pathway	Tgfbr3;Sulf1;Rnf165;Smad2;Vsir;Zfp423;Smad4;
GO:0030534	36	7	1.68494	4.15446	0.00280043	0.021247	biological_process:adult behavior	Shank2;Rnf180;Cntnap2;Nlgn3;Pax5;Shank1;Nrxn2;
GO:0034892	36	7	1.68494	4.15446	0.00280043	0.021247	molecular_function:endosulfan lactone lactonase activity	Ces1b;Ces2g;Pnpla5;Nceh1;Ces2h;Dagla;Ddhd1;
GO:0035460	36	7	1.68494	4.15446	0.00280043	0.021247	molecular_function:L-ascorbate 6-phosphate lactonase activity	Ces1b;Ces2g;Pnpla5;Nceh1;Ces2h;Dagla;Ddhd1;
GO:0043905	36	7	1.68494	4.15446	0.00280043	0.021247	molecular_function:Ser-tRNA(Thr) hydrolase activity	Ces1b;Ces2g;Pnpla5;Nceh1;Ces2h;Dagla;Ddhd1;
GO:0043906	36	7	1.68494	4.15446	0.00280043	0.021247	molecular_function:Ala-tRNA(Pro) hydrolase activity	Ces1b;Ces2g;Pnpla5;Nceh1;Ces2h;Dagla;Ddhd1;
GO:0043907	36	7	1.68494	4.15446	0.00280043	0.021247	molecular_function:Cys-tRNA(Pro) hydrolase activity	Ces1b;Ces2g;Pnpla5;Nceh1;Ces2h;Dagla;Ddhd1;
GO:0043908	36	7	1.68494	4.15446	0.00280043	0.021247	molecular_function:Ser(Gly)-tRNA(Ala) hydrolase activity	Ces1b;Ces2g;Pnpla5;Nceh1;Ces2h;Dagla;Ddhd1;
GO:0047376	36	7	1.68494	4.15446	0.00280043	0.021247	molecular_function:all-trans-retinyl-palmitate hydrolase, all-trans-retinol forming activity	Ces1b;Ces2g;Pnpla5;Nceh1;Ces2h;Dagla;Ddhd1;
GO:0052767	36	7	1.68494	4.15446	0.00280043	0.021247	molecular_function:mannosyl-oligosaccharide 1,6-alpha-mannosidase activity	Ces1b;Ces2g;Pnpla5;Nceh1;Ces2h;Dagla;Ddhd1;
GO:0052768	36	7	1.68494	4.15446	0.00280043	0.021247	molecular_function:mannosyl-oligosaccharide 1,3-alpha-mannosidase activity	Ces1b;Ces2g;Pnpla5;Nceh1;Ces2h;Dagla;Ddhd1;
GO:0080030	36	7	1.68494	4.15446	0.00280043	0.021247	molecular_function:methyl indole-3-acetate esterase activity	Ces1b;Ces2g;Pnpla5;Nceh1;Ces2h;Dagla;Ddhd1;
GO:0080031	36	7	1.68494	4.15446	0.00280043	0.021247	molecular_function:methyl salicylate esterase activity	Ces1b;Ces2g;Pnpla5;Nceh1;Ces2h;Dagla;Ddhd1;
GO:0080032	36	7	1.68494	4.15446	0.00280043	0.021247	molecular_function:methyl jasmonate esterase activity	Ces1b;Ces2g;Pnpla5;Nceh1;Ces2h;Dagla;Ddhd1;
GO:0008138	58	9	2.71462	3.31538	0.00293557	0.0222293	molecular_function:protein tyrosine/serine/threonine phosphatase activity	Nt5dc1;Cdc14a;Eya3;Fig4;Lhpp;Ssh1;Ssh2;Dupd1;Ptp4a3;
GO:0019003	58	9	2.71462	3.31538	0.00293557	0.0222293	molecular_function:GDP binding	Rab12;Rab22a;Rab7;Rab10;Rab31;Rheb;Rab3b;Arf1;Rab27a;
GO:0007611	47	8	2.19978	3.63673	0.00298427	0.0225763	biological_process:learning or memory	Prkar1b;Prkca;Ncam1;Glp1r;Kcnab1;Thra;Man2b1;Mef2c;
GO:0008083	144	16	6.73975	2.37397	0.00299171	0.0226107	molecular_function:growth factor activity	Tgfb2;Gpi1;Ptn;Lif;Egf;Pdgfd;Nrg3;Bmp6;Fgf17;Il34;Fgf12;Thbs4;Fgf9;Gdnf;Bmp1;Hgf;
GO:0008376	70	10	3.27627	3.05225	0.00302562	0.0228017	molecular_function:acetylgalactosaminyltransferase activity	Galnt15;Galnt14;Pigz;Galntl6;B4galt1;Galnt2;Wbscr17;Fut7;Galnt18;Galnt5;
GO:0071944	70	10	3.27627	3.05225	0.00302562	0.0228017	cellular_component:cell periphery	Prkce;Itga3;Bcas3;Nkd2;Ppp5c;Agap3;Fyn;Ezr;Dlg4;Efna5;
GO:0001736	18	5	0.842469	5.93494	0.00306638	0.0228017	biological_process:establishment of planar polarity	Celsr1;Wdpcp;Ttc8;Wnt5a;Ptk7;
GO:0004970	18	5	0.842469	5.93494	0.00306638	0.0228017	molecular_function:ionotropic glutamate receptor activity	Gria1;Grid1;Grik5;Grik3;Grik4;
GO:0010613	18	5	0.842469	5.93494	0.00306638	0.0228017	biological_process:positive regulation of cardiac muscle hypertrophy	Ppp3ca;Slc9a1;Ece1;Prkca;Pde5a;
GO:0010842	18	5	0.842469	5.93494	0.00306638	0.0228017	biological_process:retina layer formation	Sdk2;Fat3;Megf11;Atp8a2;Hipk2;
GO:0017015	18	5	0.842469	5.93494	0.00306638	0.0228017	biological_process:regulation of transforming growth factor beta receptor signaling pathway	Zeb1;Smad2;Itga3;Smad3;Smad4;
GO:0022408	18	5	0.842469	5.93494	0.00306638	0.0228017	biological_process:negative regulation of cell-cell adhesion	Gm9573;Tnr;Abl2;Muc4;Ptk2;
GO:0032968	18	5	0.842469	5.93494	0.00306638	0.0228017	biological_process:positive regulation of transcription elongation from RNA polymerase II promoter	Ell;Gtf2f1;Map2k1;Cbx7;Tceb1;
GO:0043296	18	5	0.842469	5.93494	0.00306638	0.0228017	cellular_component:apical junction complex	Nectin2;Ccdc85c;Cgnl1;Pard3;Mllt4;
GO:0048148	18	5	0.842469	5.93494	0.00306638	0.0228017	biological_process:behavioral response to cocaine	Kalrn;Homer2;Sdk1;Adra1b;Crhr1;
GO:0048856	18	5	0.842469	5.93494	0.00306638	0.0228017	biological_process:anatomical structure development	Eya1;Gli2;Wnt9a;Eya3;Gli3;
GO:0050910	18	5	0.842469	5.93494	0.00306638	0.0228017	biological_process:detection of mechanical stimulus involved in sensory perception of sound	Mkks;Atp2b2;Kit;Chrna10;Pcdh15;
GO:0051145	18	5	0.842469	5.93494	0.00306638	0.0228017	biological_process:smooth muscle cell differentiation	Wnt7b;Mkl1;Nfatc3;Mkl2;Mef2c;
GO:0051233	18	5	0.842469	5.93494	0.00306638	0.0228017	cellular_component:spindle midzone	Pkp4;Aurkc;Aurka;Camk2b;Racgap1;
GO:0070064	18	5	0.842469	5.93494	0.00306638	0.0228017	molecular_function:proline-rich region binding	Cyld;Baiap2l1;Itsn1;Csk;Baiap2;
GO:0070208	18	5	0.842469	5.93494	0.00306638	0.0228017	biological_process:protein heterotrimerization	Col6a1;Col6a2;Gnaq;Ogt;Gna11;
GO:0004448	27	6	1.2637	4.74795	0.0031322	0.0230941	molecular_function:isocitrate dehydrogenase activity	Kcnab2;Kcnab1;Sdr9c7;Wwox;Sdr42e1;Ctbp1;
GO:0007140	27	6	1.2637	4.74795	0.0031322	0.0230941	biological_process:male meiotic nuclear division	Tdrd12;Rspo1;Kif18a;Tex14;Mov10l1;Suv39h2;
GO:0008045	27	6	1.2637	4.74795	0.0031322	0.0230941	biological_process:motor neuron axon guidance	Plxna4;Rnf165;Slit1;Kif5c;Foxp1;Erbb2;
GO:0015758	27	6	1.2637	4.74795	0.0031322	0.0230941	biological_process:glucose transmembrane transport	Akt1;Slc2a10;Stxbp3;Slc45a1;Slc2a8;Slc2a1;
GO:0045664	27	6	1.2637	4.74795	0.0031322	0.0230941	biological_process:regulation of neuron differentiation	Eya1;Bin1;Bcl11b;Ywhag;Cdon;Nf1;
GO:0050806	27	6	1.2637	4.74795	0.0031322	0.0230941	biological_process:positive regulation of synaptic transmission	Gria1;Ptk2;Ncs1;Syt1;Dlg4;Clstn3;
GO:0050840	27	6	1.2637	4.74795	0.0031322	0.0230941	molecular_function:extracellular matrix binding	Olfml2a;Itgb3;Fbln2;Ssc5d;Smoc1;Adgrg1;
GO:0051990	27	6	1.2637	4.74795	0.0031322	0.0230941	molecular_function:(R)-2-hydroxyglutarate dehydrogenase activity	Kcnab2;Kcnab1;Sdr9c7;Wwox;Sdr42e1;Ctbp1;
GO:0060999	27	6	1.2637	4.74795	0.0031322	0.0230941	biological_process:positive regulation of dendritic spine development	Kalrn;Nlgn3;Shank1;Nlgn2;Neurl1a;Arf1;
GO:0007346	37	7	1.73174	4.04217	0.00320314	0.0235067	biological_process:regulation of mitotic cell cycle	Afap1l2;Ptch1;Gbf1;Cks1brt;Trp73;Cyld;Ttc28;
GO:0009925	37	7	1.73174	4.04217	0.00320314	0.0235067	cellular_component:basal plasma membrane	Trf;Slc23a2;Plec;Slco2b1;Ank3;Erbb2;Itga9;
GO:0018733	37	7	1.73174	4.04217	0.00320314	0.0235067	molecular_function:3,4-dihydrocoumarin hydrolase activity	Ces1b;Ces2g;Pnpla5;Nceh1;Ces2h;Dagla;Ddhd1;
GO:0045787	37	7	1.73174	4.04217	0.00320314	0.0235067	biological_process:positive regulation of cell cycle	Rara;Gdpd5;Trim32;Tgfb2;Fgfr1;Srpk2;Mdm2;
GO:0071333	37	7	1.73174	4.04217	0.00320314	0.0235067	biological_process:cellular response to glucose stimulus	Igf1r;Ogt;Pax2;Sin3a;Ppp3ca;Gas6;Kcnb1;
GO:0009953	48	8	2.24658	3.56096	0.00334693	0.0244704	biological_process:dorsal/ventral pattern formation	Dync2h1;Ptch1;Tbx20;Gli2;Ift172;Wnt7a;Gli3;Bmpr1b;
GO:0043022	48	8	2.24658	3.56096	0.00334693	0.0244704	molecular_function:ribosome binding	Stau2;Naa15;Sbds;Zc3h12a;Sec61a1;Eif3c;Cpeb1;Gcn1l1;
GO:0048286	48	8	2.24658	3.56096	0.00334693	0.0244704	biological_process:lung alveolus development	Foxp2;Stk40;Meg3;Tns3;Abca12;Lif;Zfp157;Atxn1;
GO:0050766	48	8	2.24658	3.56096	0.00334693	0.0244704	biological_process:positive regulation of phagocytosis	Slc11a1;Camk1d;Abr;Sirpa;Gas6;Tulp1;Ptk2;Rab27a;
GO:0007623	72	10	3.36988	2.96747	0.00362687	0.0262083	biological_process:circadian rhythm	Npas2;Ntrk3;Ngfr;Dyrk1a;Ntrk2;Hs3st2;Rbm4b;Ncoa2;Per3;Fas;
GO:0003281	38	7	1.77855	3.9358	0.00364856	0.0262083	biological_process:ventricular septum development	Robo1;Ptk7;Pde2a;Smarca4;Lrp2;Mdm2;Nprl3;
GO:0004812	38	7	1.77855	3.9358	0.00364856	0.0262083	molecular_function:aminoacyl-tRNA ligase activity	Wars;Aars2;Aars;Fars2;Sars2;Lars2;Gars;
GO:0043507	38	7	1.77855	3.9358	0.00364856	0.0262083	biological_process:positive regulation of JUN kinase activity	Ptk2b;Tlr9;Dab2ip;Wnt5a;Map3k5;Zeb2;Traf2;
GO:0001103	28	6	1.31051	4.57838	0.00366098	0.0262083	molecular_function:RNA polymerase II repressing transcription factor binding	Mkks;Sin3a;Ttc8;Mta1;Ppara;Chd4;
GO:0010975	28	6	1.31051	4.57838	0.00366098	0.0262083	biological_process:regulation of neuron projection development	Akt1;Smn1;Ncs1;Ulk4;Disc1;Ptprf;
GO:0016229	28	6	1.31051	4.57838	0.00366098	0.0262083	molecular_function:steroid dehydrogenase activity	Kcnab2;Kcnab1;Sdr9c7;Wwox;Sdr42e1;Ctbp1;
GO:0035108	28	6	1.31051	4.57838	0.00366098	0.0262083	biological_process:limb morphogenesis	Fbn2;Ptch1;Bak1;Wnt5a;Gli3;Bmpr1b;
GO:0055038	28	6	1.31051	4.57838	0.00366098	0.0262083	cellular_component:recycling endosome membrane	Slc9a7;Scamp5;Rab11fip4;Rab12;Scamp1;Rap2a;
GO:0001527	11	4	0.514842	7.76937	0.00367484	0.0262083	cellular_component:microfibril	Fbn2;Fbn1;Adamtsl5;Thsd4;
GO:0004690	11	4	0.514842	7.76937	0.00367484	0.0262083	molecular_function:cyclic nucleotide-dependent protein kinase activity	Alpk1;Alpk3;Adck5;Adrbk2;
GO:0005088	11	4	0.514842	7.76937	0.00367484	0.0262083	molecular_function:Ras guanyl-nucleotide exchange factor activity	Rapgef4;Sos1;Rasgef1b;Rasgef1a;
GO:0007342	11	4	0.514842	7.76937	0.00367484	0.0262083	biological_process:fusion of sperm to egg plasma membrane involved in single fertilization	Cd9;Tpst2;Adam1a;Itga3;
GO:0009086	11	4	0.514842	7.76937	0.00367484	0.0262083	biological_process:methionine biosynthetic process	Mtr;Mthfr;Mthfd1;Bhmt2;
GO:0010467	11	4	0.514842	7.76937	0.00367484	0.0262083	biological_process:gene expression	Fmn1;Fas;Mkl2;Eda;
GO:0010831	11	4	0.514842	7.76937	0.00367484	0.0262083	biological_process:positive regulation of myotube differentiation	Mamstr;Myog;Mmp14;Thra;
GO:0016817	11	4	0.514842	7.76937	0.00367484	0.0262083	molecular_function:hydrolase activity, acting on acid anhydrides	Chd7;Chd9;Smarca4;Smarca2;
GO:0016909	11	4	0.514842	7.76937	0.00367484	0.0262083	molecular_function:SAP kinase activity	Alpk1;Alpk3;Adck5;Adrbk2;
GO:0017154	11	4	0.514842	7.76937	0.00367484	0.0262083	molecular_function:semaphorin receptor activity	Plxna4;Plxna1;Plxnc1;Nrp2;
GO:0019199	11	4	0.514842	7.76937	0.00367484	0.0262083	molecular_function:transmembrane receptor protein kinase activity	Alpk1;Alpk3;Adck5;Adrbk2;
GO:0030660	11	4	0.514842	7.76937	0.00367484	0.0262083	cellular_component:Golgi-associated vesicle membrane	Pi4ka;H13;Zdhhc17;Cspg5;
GO:0032897	11	4	0.514842	7.76937	0.00367484	0.0262083	biological_process:negative regulation of viral transcription	Trim27;Trim8;Trim14;Trim32;
GO:0042641	11	4	0.514842	7.76937	0.00367484	0.0262083	cellular_component:actomyosin	Cdc42bpb;Kat2b;Myo18a;Hdac4;
GO:0045334	11	4	0.514842	7.76937	0.00367484	0.0262083	cellular_component:clathrin-coated endocytic vesicle	Myo1e;Ngfr;Myo6;Cpne2;
GO:0045820	11	4	0.514842	7.76937	0.00367484	0.0262083	biological_process:negative regulation of glycolytic process	Myog;Ppargc1a;Cbfa2t3;Hdac4;
GO:0051967	11	4	0.514842	7.76937	0.00367484	0.0262083	biological_process:negative regulation of synaptic transmission, glutamatergic	Pla2g6;Park2;Atad1;Grik3;
GO:1904707	11	4	0.514842	7.76937	0.00367484	0.0262083	biological_process:positive regulation of vascular smooth muscle cell proliferation	Ddx39b;Mdm2;Tert;Map3k5;
GO:0000993	19	5	0.889273	5.62257	0.00373186	0.0264052	molecular_function:RNA polymerase II complex binding	Smyd3;Ikbkap;Elp2;Zfp326;Elp3;
GO:0001502	19	5	0.889273	5.62257	0.00373186	0.0264052	biological_process:cartilage condensation	Ror2;Wnt7a;Tgfb2;Thra;Bmpr1b;
GO:0016601	19	5	0.889273	5.62257	0.00373186	0.0264052	biological_process:Rac protein signal transduction	Farp2;Cdh13;Nisch;Eps8;Elmo1;
GO:0032148	19	5	0.889273	5.62257	0.00373186	0.0264052	biological_process:activation of protein kinase B activity	Ang;Ntrk3;Gas6;Insr;Wnt5a;
GO:0032588	19	5	0.889273	5.62257	0.00373186	0.0264052	cellular_component:trans-Golgi network membrane	Rab31;Scamp5;Lgr5;Caln1;Atp7b;
GO:0060077	19	5	0.889273	5.62257	0.00373186	0.0264052	cellular_component:inhibitory synapse	Bsn;Nlgn3;Syt11;Glra1;Nlgn2;
GO:0016328	49	8	2.29339	3.48829	0.00374284	0.0264052	cellular_component:lateral plasma membrane	Ptpro;Nkd2;Mark2;Tbcd;Iqgap1;Ank3;Cldn15;Sptan1;
GO:0021766	49	8	2.29339	3.48829	0.00374284	0.0264052	biological_process:hippocampus development	Ptprs;Lrp8;Trp73;Dlx2;Kirrel3;Mkks;Zeb2;Gli3;
GO:0030819	49	8	2.29339	3.48829	0.00374284	0.0264052	biological_process:obsolete positive regulation of cAMP biosynthetic process	Akap12;Rxfp2;Adcy7;Ece1;Ramp1;Gnas;Adcyap1r1;Crhr1;
GO:0032024	49	8	2.29339	3.48829	0.00374284	0.0264052	biological_process:positive regulation of insulin secretion	Prkce;Blk;Mcu;Glud1;Glp1r;Ppard;Nlgn2;Myrip;
GO:0045600	49	8	2.29339	3.48829	0.00374284	0.0264052	biological_process:positive regulation of fat cell differentiation	Zc3h12a;Wnt5b;Akt1;Zbtb16;Zbtb7c;Tph1;Asxl2;Stk3;
GO:1903561	49	8	2.29339	3.48829	0.00374284	0.0264052	cellular_component:extracellular vesicle	Itgb2;Vcl;Col6a2;Fbln2;Ift172;Col6a3;Cd9;Sptan1;
GO:0016485	85	11	3.97833	2.76498	0.00382223	0.026941	biological_process:protein processing	Dync2h1;Casp7;Adamts2;Corin;Ift172;Gli3;Cpz;Ptch1;Aph1c;Ece1;Pcsk6;
GO:0032496	133	15	6.22491	2.40967	0.00389308	0.0274158	biological_process:response to lipopolysaccharide	Mapk1;Tnfrsf26;Litaf;Slc11a1;Mta1;Abr;Fas;Cd6;Tnfrsf8;Prdx3;Ptpn22;Fer;Ngfr;Plcg2;Eif2ak2;
GO:0002250	134	15	6.27171	2.39169	0.00402786	0.0283395	biological_process:adaptive immune response	Tfeb;Cd74;Skap1;Ifna12;Fyn;Dclre1c;Cd244;Txk;Camk4;Gm13275;Pik3cd;Csk;Ptk2b;Jak3;Cd84;
GO:0005975	193	19	9.03314	2.10337	0.0040659	0.0285815	biological_process:carbohydrate metabolic process	Hkdc1;Gpi1;Chia1;Hk2;Phkb;B4galt1;Akt1;Dcxr;Man2b1;Gfpt2;Hyal3;Glb1;Chst11;Chil3;Gbgt1;Phkg2;Mgat4a;Man2b2;Gbe1;
GO:0000785	112	13	5.24203	2.47995	0.00411375	0.0288107	cellular_component:chromatin	Mau2;Fam178a;Trp73;Sin3a;Rbl2;H2afy;Tnrc18;Rad21;Hlcs;Parpbp;Nipbl;Suv39h2;Mcm2;
GO:0009952	112	13	5.24203	2.47995	0.00411375	0.0288107	biological_process:anterior/posterior pattern specification	Cdon;Wnt5a;Mllt3;Gli2;Zbtb16;Pbx1;Hipk2;Gli3;Smad4;Celsr1;Hnf1b;Smad2;Crkl;
GO:0043085	39	7	1.82535	3.83488	0.00413947	0.0288107	biological_process:positive regulation of catalytic activity	Aph1c;Azin2;Bcas3;Fgfr4;Slc37a4;Ywhab;Arf1;
GO:0043124	39	7	1.82535	3.83488	0.00413947	0.0288107	biological_process:negative regulation of I-kappaB kinase/NF-kappaB signaling	Gstp1;Zc3h12a;Dab2ip;Ripk1;Usp10;Tnip1;Rora;
GO:0005814	86	11	4.02513	2.73283	0.00413977	0.0288107	cellular_component:centriole	Ahi1;Tssk2;Agbl4;Dzip1;Wdr34;Top2a;Nin;2700049A03Rik;Cntrob;Sclt1;Crocc;
GO:0050829	50	8	2.34019	3.41852	0.00417394	0.0288107	biological_process:defense response to Gram-negative bacterium	Il22ra1;Slc11a1;Ssc5d;Tlr9;Tusc2;Tlr5;Drosha;Naip5;
GO:0000339	5	3	0.234019	12.8195	0.00423071	0.0288107	molecular_function:RNA cap binding	Larp1;Lsm1;Ncbp3;
GO:0001878	5	3	0.234019	12.8195	0.00423071	0.0288107	biological_process:response to yeast	Ncf1;Mpo;Ang;
GO:0003231	5	3	0.234019	12.8195	0.00423071	0.0288107	biological_process:cardiac ventricle development	Fgf9;Tmem65;Scn5a;
GO:0004791	5	3	0.234019	12.8195	0.00423071	0.0288107	molecular_function:thioredoxin-disulfide reductase activity	Txnrd2;Txnrd1;Nxn;
GO:0006555	5	3	0.234019	12.8195	0.00423071	0.0288107	biological_process:methionine metabolic process	Mtr;Mthfr;Mthfd1;
GO:0010694	5	3	0.234019	12.8195	0.00423071	0.0288107	biological_process:positive regulation of alkaline phosphatase activity	Ppargc1b;Smad3;Mef2c;
GO:0015808	5	3	0.234019	12.8195	0.00423071	0.0288107	biological_process:L-alanine transport	Slc36a4;Slc36a2;Slc38a3;
GO:0016202	5	3	0.234019	12.8195	0.00423071	0.0288107	biological_process:regulation of striated muscle tissue development	Boc;Smad3;Cdon;
GO:0018022	5	3	0.234019	12.8195	0.00423071	0.0288107	biological_process:peptidyl-lysine methylation	Camkmt;Setd3;Setd7;
GO:0018027	5	3	0.234019	12.8195	0.00423071	0.0288107	biological_process:peptidyl-lysine dimethylation	Ehmt1;Setd3;Setd7;
GO:0021891	5	3	0.234019	12.8195	0.00423071	0.0288107	biological_process:olfactory bulb interneuron development	Wnt5a;Robo2;Robo1;
GO:0035610	5	3	0.234019	12.8195	0.00423071	0.0288107	biological_process:protein side chain deglutamylation	Agtpbp1;Agbl1;Agbl4;
GO:0040023	5	3	0.234019	12.8195	0.00423071	0.0288107	biological_process:nuclear migration	Slit1;Syne1;Ptk2;
GO:0043550	5	3	0.234019	12.8195	0.00423071	0.0288107	biological_process:regulation of lipid kinase activity	Rbl2;Vac14;Rbl1;
GO:0044323	5	3	0.234019	12.8195	0.00423071	0.0288107	molecular_function:retinoic acid-responsive element binding	Rara;Zfp536;Myt1l;
GO:0046068	5	3	0.234019	12.8195	0.00423071	0.0288107	biological_process:cGMP metabolic process	Rora;Pde5a;Atp2b2;
GO:0046879	5	3	0.234019	12.8195	0.00423071	0.0288107	biological_process:hormone secretion	Ltbp4;Glp1r;Lrp2;
GO:0047391	5	3	0.234019	12.8195	0.00423071	0.0288107	molecular_function:alkylglycerophosphoethanolamine phosphodiesterase activity	Gnaq;Gna11;Gnas;
GO:0048194	5	3	0.234019	12.8195	0.00423071	0.0288107	biological_process:Golgi vesicle budding	Myo18a;Atp8a2;Atp8a1;
GO:0048592	5	3	0.234019	12.8195	0.00423071	0.0288107	biological_process:eye morphogenesis	Nipbl;Stau2;Col5a1;
GO:0048787	5	3	0.234019	12.8195	0.00423071	0.0288107	cellular_component:presynaptic active zone membrane	Grm4;Otof;Syt11;
GO:0061333	5	3	0.234019	12.8195	0.00423071	0.0288107	biological_process:renal tubule morphogenesis	Col4a1;Mtss1;Mef2c;
GO:0061588	5	3	0.234019	12.8195	0.00423071	0.0288107	biological_process:calcium activated phospholipid scrambling	Ano7;Ano9;Ano4;
GO:0061590	5	3	0.234019	12.8195	0.00423071	0.0288107	biological_process:calcium activated phosphatidylcholine scrambling	Ano7;Ano9;Ano4;
GO:0061591	5	3	0.234019	12.8195	0.00423071	0.0288107	biological_process:calcium activated galactosylceramide scrambling	Ano7;Ano9;Ano4;
GO:0072102	5	3	0.234019	12.8195	0.00423071	0.0288107	biological_process:glomerulus morphogenesis	Kirrel3;Mtss1;Mef2c;
GO:1900454	5	3	0.234019	12.8195	0.00423071	0.0288107	biological_process:positive regulation of long-term synaptic depression	Stau2;Mapt;Kcnb1;
GO:1904491	5	3	0.234019	12.8195	0.00423071	0.0288107	biological_process:protein localization to ciliary transition zone	Tctn1;Tctn2;Cc2d2a;
GO:2000324	5	3	0.234019	12.8195	0.00423071	0.0288107	biological_process:positive regulation of glucocorticoid receptor signaling pathway	Ppp5c;Ncoa2;Ntrk2;
GO:2000809	5	3	0.234019	12.8195	0.00423071	0.0288107	biological_process:positive regulation of synaptic vesicle clustering	Nlgn2;Magi2;Nlgn3;
GO:0004033	29	6	1.35731	4.42051	0.00425316	0.0288883	molecular_function:aldo-keto reductase (NADP) activity	Kcnab2;Kcnab1;Sdr9c7;Wwox;Sdr42e1;Ctbp1;
GO:0005272	29	6	1.35731	4.42051	0.00425316	0.0288883	molecular_function:sodium channel activity	Scnn1b;Scn5a;Asic2;Scn8a;Asic1;Trpm5;
GO:0031663	29	6	1.35731	4.42051	0.00425316	0.0288883	biological_process:lipopolysaccharide-mediated signaling pathway	Akt1;Prkce;Ptpn22;Irak2;Cd6;Mapk1;
GO:0005643	62	9	2.90184	3.10148	0.00435908	0.0295822	cellular_component:nuclear pore	Kpna1;Nup133;Nup98;Nup160;Mcm3ap;Mad1l1;Rae1;Xpo4;Gle1;
GO:0000307	20	5	0.936077	5.34144	0.00449467	0.0302407	cellular_component:cyclin-dependent protein kinase holoenzyme complex	Ccnk;Cdk6;Ccnc;Ccnd3;Cks1brt;
GO:0003148	20	5	0.936077	5.34144	0.00449467	0.0302407	biological_process:outflow tract septum morphogenesis	Rara;Tbx20;Tgfb2;Rarb;Tbx2;
GO:0004198	20	5	0.936077	5.34144	0.00449467	0.0302407	molecular_function:calcium-dependent cysteine-type endopeptidase activity	Adgb;Capn9;Capn15;Capn8;Capn3;
GO:0007422	20	5	0.936077	5.34144	0.00449467	0.0302407	biological_process:peripheral nervous system development	Adgrb2;Gdnf;Nfasc;Nf1;Erbb2;
GO:0017075	20	5	0.936077	5.34144	0.00449467	0.0302407	molecular_function:syntaxin-1 binding	Lrrk2;Stxbp3;Syt1;Cplx2;Dapk1;
GO:0035327	20	5	0.936077	5.34144	0.00449467	0.0302407	cellular_component:transcriptionally active chromatin	Ice2;Ell;Padi2;Exosc10;Bcas3;
GO:0043325	20	5	0.936077	5.34144	0.00449467	0.0302407	molecular_function:phosphatidylinositol-3,4-bisphosphate binding	Akt1;Fam21;Commd1;Mapkap1;Ncf1;
GO:0048066	20	5	0.936077	5.34144	0.00449467	0.0302407	biological_process:developmental pigmentation	Zeb2;Gnaq;Kit;Oca2;Gna11;
GO:0051894	20	5	0.936077	5.34144	0.00449467	0.0302407	biological_process:positive regulation of focal adhesion assembly	Ptprj;Lims1;Iqgap1;Fmn1;Smad3;
GO:0060384	20	5	0.936077	5.34144	0.00449467	0.0302407	biological_process:innervation	Chd7;Rnf165;Gabra5;Unc13b;Sulf1;
GO:0016887	178	18	8.33108	2.16058	0.00458214	0.0308028	molecular_function:ATPase activity	Dync2h1;Entpd2;Atad1;Atad2b;Myo9b;Blm;Kif3c;Dnah17;Smarca2;Dnah12;Abca3;Abca17;Dnah8;Kif9;Ptpa;Smarca4;Kif13b;Ddx39b;
GO:0004722	51	8	2.387	3.35149	0.00464226	0.0311389	molecular_function:protein serine/threonine phosphatase activity	Ppp1cc;Ppp2r2b;Ppa2;Phlpp1;Tab1;Cdc14a;Mtmr3;Ppp3ca;
GO:0051865	51	8	2.387	3.35149	0.00464226	0.0311389	biological_process:protein autoubiquitination	Wwp2;Rnf141;Rnf220;Rnf185;Lrsam1;Traf2;Trim71;Park2;
GO:0034446	40	7	1.87215	3.73901	0.00467874	0.0311389	biological_process:substrate adhesion-dependent cell spreading	Itgb3;Pxn;Akip1;Lama5;Srgap2;Antxr1;Fer;
GO:0004843	75	10	3.51029	2.84877	0.004702	0.0311389	molecular_function:thiol-dependent ubiquitin-specific protease activity	Usp4;Usp34;Usp38;Cyld;Usp10;Usp28;Stambp;Zc3h12a;Josd2;Tnip1;
GO:0007596	75	10	3.51029	2.84877	0.004702	0.0311389	biological_process:blood coagulation	Ptprj;Serpinc1;Rab27a;Serpind1;F2rl3;Vwf;Gp1ba;Pdgfd;Gas6;Proz;
GO:0050679	75	10	3.51029	2.84877	0.004702	0.0311389	biological_process:positive regulation of epithelial cell proliferation	Foxp2;Bmp6;Scn5a;Foxp1;Map2k5;Wnt5a;Eya1;Erbb2;Pax2;Fgf9;
GO:0001076	12	4	0.561646	7.12192	0.00472739	0.0311389	molecular_function:obsolete transcription factor activity, RNA polymerase II transcription factor binding	Mamstr;Twist2;Nacc2;Smad4;
GO:0004676	12	4	0.561646	7.12192	0.00472739	0.0311389	molecular_function:3-phosphoinositide-dependent protein kinase activity	Alpk1;Alpk3;Adck5;Adrbk2;
GO:0005227	12	4	0.561646	7.12192	0.00472739	0.0311389	molecular_function:calcium activated cation channel activity	Tmem63c;Ano1;Catsper2;Trpm5;
GO:0006198	12	4	0.561646	7.12192	0.00472739	0.0311389	biological_process:cAMP catabolic process	Pde10a;Pde4d;Pde1c;Pde2a;
GO:0006826	12	4	0.561646	7.12192	0.00472739	0.0311389	biological_process:iron ion transport	Trf;Slc11a1;Steap3;Slc39a14;
GO:0007252	12	4	0.561646	7.12192	0.00472739	0.0311389	biological_process:I-kappaB phosphorylation	Tlr9;Dab2ip;Ikbkap;Erc1;
GO:0019912	12	4	0.561646	7.12192	0.00472739	0.0311389	molecular_function:cyclin-dependent protein kinase activating kinase activity	Alpk1;Alpk3;Adck5;Adrbk2;
GO:0021953	12	4	0.561646	7.12192	0.00472739	0.0311389	biological_process:central nervous system neuron differentiation	Bcl11b;Sox5;Cacna1a;Spock1;
GO:0031045	12	4	0.561646	7.12192	0.00472739	0.0311389	cellular_component:dense core granule	Ncs1;Syt1;Crhbp;Myrip;
GO:0031143	12	4	0.561646	7.12192	0.00472739	0.0311389	cellular_component:pseudopodium	Actn4;Mapk1;Rab25;Raf1;
GO:0031512	12	4	0.561646	7.12192	0.00472739	0.0311389	cellular_component:motile cilium	Dnah11;Dync2h1;Dync2li1;Gli2;
GO:0031994	12	4	0.561646	7.12192	0.00472739	0.0311389	molecular_function:insulin-like growth factor I binding	Itgb3;Igf1r;Igfbp6;Insr;
GO:0044237	12	4	0.561646	7.12192	0.00472739	0.0311389	biological_process:cellular metabolic process	Mtr;Blm;Exosc10;Wnt7b;
GO:0045651	12	4	0.561646	7.12192	0.00472739	0.0311389	biological_process:positive regulation of macrophage differentiation	Prkca;Lif;Ripk1;Il34;
GO:0045945	12	4	0.561646	7.12192	0.00472739	0.0311389	biological_process:positive regulation of transcription by RNA polymerase III	Ice2;Ell;Erbb2;Rptor;
GO:0046626	12	4	0.561646	7.12192	0.00472739	0.0311389	biological_process:regulation of insulin receptor signaling pathway	Baiap2l1;Ccnd3;Ogt;Ptpn1;
GO:0048009	12	4	0.561646	7.12192	0.00472739	0.0311389	biological_process:insulin-like growth factor receptor signaling pathway	Akt1;Igf1r;Gigyf2;Plcb1;
GO:0048407	12	4	0.561646	7.12192	0.00472739	0.0311389	molecular_function:platelet-derived growth factor binding	Col4a1;Pdgfra;Col6a1;Col5a1;
GO:0000149	63	9	2.94864	3.05225	0.00478733	0.0314808	molecular_function:SNARE binding	Ykt6;Syt7;Nbas;Cplx2;Lrrk2;Exoc3l;Syt11;Kcnb1;Syt1;
GO:0004004	63	9	2.94864	3.05225	0.00478733	0.0314808	molecular_function:ATP-dependent RNA helicase activity	Ddx10;Dhx35;Dhx36;Mov10l1;Ddx43;Tdrd12;Dhx33;Ythdc2;Ddx39b;
GO:0006487	30	6	1.40412	4.27315	0.00491309	0.032173	biological_process:protein N-linked glycosylation	Fut7;Dpm1;Alg8;B4galt1;Mgat5;Mgat4a;
GO:0016597	30	6	1.40412	4.27315	0.00491309	0.032173	molecular_function:amino acid binding	Mtr;Ddah1;Tph1;Aars2;Aars;Ass1;
GO:0030162	30	6	1.40412	4.27315	0.00491309	0.032173	biological_process:regulation of proteolysis	Ltbp4;Btbd9;Btbd11;Gm4858;Abtb1;Abtb2;
GO:0032154	30	6	1.40412	4.27315	0.00491309	0.032173	cellular_component:cleavage furrow	Rab11fip4;Stambp;Rab11fip3;Mylk;Spire2;Racgap1;
GO:0032993	30	6	1.40412	4.27315	0.00491309	0.032173	cellular_component:protein-DNA complex	Myog;Eya1;Tead4;Chd4;Ddit3;Pax2;
GO:0009636	52	8	2.4338	3.28704	0.00514981	0.033695	biological_process:response to toxic substance	Gria1;Slc6a1;Trpm6;Mapk1;Fas;Arnt2;Eif2ak2;Scn8a;
GO:0000932	64	9	2.99545	3.00456	0.00524753	0.0342772	cellular_component:P-body	Zc3h12d;Lsm1;Zc3h12a;Dcp2;Eif4enif1;Dcps;Ythdf2;Trim71;Pan2;
GO:0045454	64	9	2.99545	3.00456	0.00524753	0.0342772	biological_process:cell redox homeostasis	Txnl1;Txnrd1;Nxn;Tmx1;Txndc11;Txnrd2;Prdx3;Gclc;Ddit3;
GO:0019838	41	7	1.91896	3.64782	0.00526923	0.0343617	molecular_function:growth factor binding	Ltbp4;Ltbp2;Flt1;Igfbp6;Acvr1b;Nkd2;Erbb2;
GO:0040018	41	7	1.91896	3.64782	0.00526923	0.0343617	biological_process:positive regulation of multicellular organism growth	Chd7;Gpam;Nipbl;Ezr;Mkks;Tshr;Atp8a2;
GO:0005539	21	5	0.982881	5.08709	0.00536211	0.0347364	molecular_function:glycosaminoglycan binding	Abi3bp;Ptn;Tgfbr3;Gns;Mamdc2;
GO:0009612	21	5	0.982881	5.08709	0.00536211	0.0347364	biological_process:response to mechanical stimulus	Piezo2;Kalrn;Asic2;Lrp11;P2rx3;
GO:0030215	21	5	0.982881	5.08709	0.00536211	0.0347364	molecular_function:semaphorin receptor binding	Sema5b;Sema4g;Sema4d;Sema4f;Sema6a;
GO:0043393	21	5	0.982881	5.08709	0.00536211	0.0347364	biological_process:regulation of protein binding	Cyld;Tgfbr3;Smarcd3;Hdac4;Pax7;
GO:0045778	21	5	0.982881	5.08709	0.00536211	0.0347364	biological_process:positive regulation of ossification	Lect1;Zbtb16;Nipbl;Runx2;Wnt5a;
GO:0045879	21	5	0.982881	5.08709	0.00536211	0.0347364	biological_process:negative regulation of smoothened signaling pathway	Glis2;Wnt7b;Ptch1;Runx2;Gli3;
GO:0046965	21	5	0.982881	5.08709	0.00536211	0.0347364	molecular_function:retinoid X receptor binding	Ncoa2;Nr1h2;Ppard;Rarb;Ncoa1;
GO:0048266	21	5	0.982881	5.08709	0.00536211	0.0347364	biological_process:behavioral response to pain	Runx1;P2rx3;Cacna1a;Crhr1;Thbs4;
GO:0007616	31	6	1.45092	4.13531	0.00564515	0.0364495	biological_process:long-term memory	Ntrk2;Gria1;Btbd9;Adcy8;Camk4;Shank1;
GO:0015030	31	6	1.45092	4.13531	0.00564515	0.0364495	cellular_component:Cajal body	Ice2;Ell;Eftud2;Smn1;Zfp473;Wrap53;
GO:0060612	31	6	1.45092	4.13531	0.00564515	0.0364495	biological_process:adipose tissue development	Ebf2;Ppargc1a;Zfp516;Creb5;Ppard;Fto;
GO:0071320	31	6	1.45092	4.13531	0.00564515	0.0364495	biological_process:cellular response to cAMP	Ezr;Itpr2;Itpr1;Crhbp;Kcnq1;Itpr3;
GO:0019882	53	8	2.4806	3.22502	0.00569866	0.0367346	biological_process:antigen processing and presentation	Rab3c;Raet1e;Azgp1;Cd74;Rab10;Rab3b;9230019H11Rik;Rab27a;
GO:0030178	53	8	2.4806	3.22502	0.00569866	0.0367346	biological_process:negative regulation of Wnt signaling pathway	Dact3;Dkk3;Nxn;Nkd1;Fgf9;Rnf43;Nkd2;Wwox;
GO:0005819	65	9	3.04225	2.95834	0.00574122	0.0369785	cellular_component:spindle	Map2k5;Cyld;Aurka;Pard3;Syne1;Anxa11;Incenp;Akt1;Cspp1;
GO:0030331	42	7	1.96576	3.56096	0.00591385	0.0377811	molecular_function:estrogen receptor binding	Dnmt1;Ccdc62;Ppargc1b;Ncoa1;Ncoa2;Ppargc1a;Padi2;
GO:0045429	42	7	1.96576	3.56096	0.00591385	0.0377811	biological_process:positive regulation of nitric oxide biosynthetic process	Ptk2b;Itgb2;Tlr5;Akt1;Ddah1;Insr;Ass1;
GO:0002087	13	4	0.60845	6.57408	0.00596484	0.0377811	biological_process:regulation of respiratory gaseous exchange by neurological system process	Nlgn3;Glra1;Nlgn2;Pbx3;
GO:0004677	13	4	0.60845	6.57408	0.00596484	0.0377811	molecular_function:DNA-dependent protein kinase activity	Alpk1;Alpk3;Adck5;Adrbk2;
GO:0004706	13	4	0.60845	6.57408	0.00596484	0.0377811	molecular_function:JUN kinase kinase kinase activity	Alpk1;Alpk3;Adck5;Adrbk2;
GO:0005916	13	4	0.60845	6.57408	0.00596484	0.0377811	cellular_component:fascia adherens	Ctnna3;Nrap;Vcl;Sptan1;
GO:0006400	13	4	0.60845	6.57408	0.00596484	0.0377811	biological_process:tRNA modification	Wdr4;Aars2;Aars;Trub1;
GO:0006956	13	4	0.60845	6.57408	0.00596484	0.0377811	biological_process:complement activation	C1rb;C1s1;C1s2;Masp1;
GO:0008545	13	4	0.60845	6.57408	0.00596484	0.0377811	molecular_function:JUN kinase kinase activity	Alpk1;Alpk3;Adck5;Adrbk2;
GO:0030238	13	4	0.60845	6.57408	0.00596484	0.0377811	biological_process:male sex determination	Fgf9;Insrr;Igf1r;Insr;
GO:0031616	13	4	0.60845	6.57408	0.00596484	0.0377811	cellular_component:spindle pole centrosome	Kifc1;Tbccd1;Aurkc;Aurka;
GO:0032924	13	4	0.60845	6.57408	0.00596484	0.0377811	biological_process:activin receptor signaling pathway	Hfe2;Smad2;Acvr1b;Smad3;
GO:0036038	13	4	0.60845	6.57408	0.00596484	0.0377811	cellular_component:MKS complex	Ahi1;Tctn2;Tctn1;Cc2d2a;
GO:0040037	13	4	0.60845	6.57408	0.00596484	0.0377811	biological_process:negative regulation of fibroblast growth factor receptor signaling pathway	Sulf1;Wnt5a;Prdm14;Ngfr;
GO:0043200	13	4	0.60845	6.57408	0.00596484	0.0377811	biological_process:response to amino acid	Glra3;Glra1;Aars;Glrb;
GO:0044255	13	4	0.60845	6.57408	0.00596484	0.0377811	biological_process:cellular lipid metabolic process	Nr1h2;Gpam;Fam135a;Fam135b;
GO:0045295	13	4	0.60845	6.57408	0.00596484	0.0377811	molecular_function:gamma-catenin binding	Ptprj;Ptprt;Fer;Ctnna1;
GO:0046847	13	4	0.60845	6.57408	0.00596484	0.0377811	biological_process:filopodium assembly	Ezr;Fgd3;Ppp1r9b;Srgap2;
GO:0061036	13	4	0.60845	6.57408	0.00596484	0.0377811	biological_process:positive regulation of cartilage development	Sox5;Wnt5a;Zbtb16;Bmp1;
GO:2001222	13	4	0.60845	6.57408	0.00596484	0.0377811	biological_process:regulation of neuron migration	Zswim6;Shtn1;Ulk4;Unc5d;
GO:0001835	6	3	0.280823	10.6829	0.00613552	0.0377811	biological_process:blastocyst hatching	Smarcb1;Smarca4;Prss28;
GO:0003344	6	3	0.280823	10.6829	0.00613552	0.0377811	biological_process:pericardium morphogenesis	Wnt5a;Tbx20;Sos1;
GO:0003988	6	3	0.280823	10.6829	0.00613552	0.0377811	molecular_function:acetyl-CoA C-acyltransferase activity	Scp2;Hadha;Hadhb;
GO:0010669	6	3	0.280823	10.6829	0.00613552	0.0377811	biological_process:epithelial structure maintenance	Ldb2;Ldb1;Crocc;
GO:0010882	6	3	0.280823	10.6829	0.00613552	0.0377811	biological_process:regulation of cardiac muscle contraction by calcium ion signaling	Slc9a1;Ryr2;Hdac4;
GO:0014731	6	3	0.280823	10.6829	0.00613552	0.0377811	cellular_component:spectrin-associated cytoskeleton	Rhbg;Ank3;Ank1;
GO:0014894	6	3	0.280823	10.6829	0.00613552	0.0377811	biological_process:response to denervation involved in regulation of muscle adaptation	Myog;Scn5a;Hdac4;
GO:0014904	6	3	0.280823	10.6829	0.00613552	0.0377811	biological_process:myotube cell development	Nfatc2;Nfatc3;Smyd3;
GO:0031258	6	3	0.280823	10.6829	0.00613552	0.0377811	cellular_component:lamellipodium membrane	Syne2;Antxr1;Itgb3;
GO:0033588	6	3	0.280823	10.6829	0.00613552	0.0377811	cellular_component:Elongator holoenzyme complex	Ikbkap;Elp2;Elp3;
GO:0042796	6	3	0.280823	10.6829	0.00613552	0.0377811	biological_process:snRNA transcription by RNA polymerase III	Ice2;Ell;Snapc4;
GO:0043566	6	3	0.280823	10.6829	0.00613552	0.0377811	molecular_function:DNA binding	Tet1;Endov;Top2a;
GO:0044214	6	3	0.280823	10.6829	0.00613552	0.0377811	cellular_component:spanning component of plasma membrane	Raet1e;Cd6;Cdhr5;
GO:0044354	6	3	0.280823	10.6829	0.00613552	0.0377811	cellular_component:macropinosome	Lrrc16a;Anxa2;Mmp14;
GO:0044828	6	3	0.280823	10.6829	0.00613552	0.0377811	biological_process:negative regulation by host of viral genome replication	Ccnk;Park2;Zc3h12a;
GO:0045925	6	3	0.280823	10.6829	0.00613552	0.0377811	biological_process:positive regulation of female receptivity	Thra;Ncoa1;Ncoa2;
GO:0046500	6	3	0.280823	10.6829	0.00613552	0.0377811	biological_process:S-adenosylmethionine metabolic process	Gamt;Dnmt1;Bhmt2;
GO:0046822	6	3	0.280823	10.6829	0.00613552	0.0377811	biological_process:regulation of nucleocytoplasmic transport	Ppp1r12a;Ppp1cc;Inpp4b;
GO:0048495	6	3	0.280823	10.6829	0.00613552	0.0377811	molecular_function:Roundabout binding	Slit1;Slit3;Myo9b;
GO:0050917	6	3	0.280823	10.6829	0.00613552	0.0377811	biological_process:sensory perception of umami taste	Tas1r3;Tas1r1;Itpr3;
GO:0052695	6	3	0.280823	10.6829	0.00613552	0.0377811	biological_process:cellular glucuronidation	Ugt1a5;Ugt1a1;Ugt1a2;
GO:0055012	6	3	0.280823	10.6829	0.00613552	0.0377811	biological_process:ventricular cardiac muscle cell differentiation	Rara;Rarb;Mef2c;
GO:0060294	6	3	0.280823	10.6829	0.00613552	0.0377811	biological_process:cilium movement involved in cell motility	Dnah1;Cfap46;Tekt4;
GO:0060372	6	3	0.280823	10.6829	0.00613552	0.0377811	biological_process:regulation of atrial cardiac muscle cell membrane repolarization	Cacna1d;Scn5a;Kcnq1;
GO:0060998	6	3	0.280823	10.6829	0.00613552	0.0377811	biological_process:regulation of dendritic spine development	Sdk1;Disc1;Mef2c;
GO:0070296	6	3	0.280823	10.6829	0.00613552	0.0377811	biological_process:sarcoplasmic reticulum calcium ion transport	Cacng1;Ryr1;Ryr2;
GO:0072201	6	3	0.280823	10.6829	0.00613552	0.0377811	biological_process:negative regulation of mesenchymal cell proliferation	Lmna;Wnt5a;Ptn;
GO:0090036	6	3	0.280823	10.6829	0.00613552	0.0377811	biological_process:regulation of protein kinase C signaling	Ulk4;Capzb;Akap12;
GO:0097300	6	3	0.280823	10.6829	0.00613552	0.0377811	biological_process:programmed necrotic cell death	Traf2;Nlrp1a;Map3k5;
GO:1901016	6	3	0.280823	10.6829	0.00613552	0.0377811	biological_process:regulation of potassium ion transmembrane transporter activity	Wwp2;Cacna1d;Kcnab1;
GO:1902459	6	3	0.280823	10.6829	0.00613552	0.0377811	biological_process:positive regulation of stem cell population maintenance	Tead4;Prdm14;Kdm2b;
GO:1903053	6	3	0.280823	10.6829	0.00613552	0.0377811	biological_process:regulation of extracellular matrix organization	Abl2;Itgb3;Tgfb2;
GO:1903779	6	3	0.280823	10.6829	0.00613552	0.0377811	biological_process:regulation of cardiac conduction	Tnni3k;Tmem65;Ace2;
GO:1904938	6	3	0.280823	10.6829	0.00613552	0.0377811	biological_process:planar cell polarity pathway involved in axon guidance	Wnt5a;Celsr3;Wnt7b;
GO:1990454	6	3	0.280823	10.6829	0.00613552	0.0377811	cellular_component:L-type voltage-gated calcium channel complex	Cacna1c;Cacnb2;Cacna1d;
GO:2000641	6	3	0.280823	10.6829	0.00613552	0.0377811	biological_process:regulation of early endosome to late endosome transport	Mapk1;Map2k2;Map2k1;
GO:0000979	66	9	3.08905	2.91351	0.00626994	0.0385786	molecular_function:RNA polymerase II core promoter sequence-specific DNA binding	Tfap2b;Smyd3;H2afy;Runx2;Nfatc1;Irf7;Kdm2b;Rreb1;Nlrc5;
GO:0004407	22	5	1.02968	4.85586	0.00634136	0.0388656	molecular_function:histone deacetylase activity	Hdac8;Sin3a;Nacc2;Hdac4;Hdac9;
GO:0016925	22	5	1.02968	4.85586	0.00634136	0.0388656	biological_process:protein sumoylation	Sumo3;Eya1;Pias1;Pias3;Bcl11a;
GO:0034612	22	5	1.02968	4.85586	0.00634136	0.0388656	biological_process:response to tumor necrosis factor	Aff3;Trim32;Ythdc2;Insr;Ripk1;
GO:0045638	22	5	1.02968	4.85586	0.00634136	0.0388656	biological_process:negative regulation of myeloid cell differentiation	Ptk2b;Cdk6;Zbtb16;Twist2;Itpkb;
GO:0046854	22	5	1.02968	4.85586	0.00634136	0.0388656	biological_process:phosphatidylinositol phosphorylation	Pi4ka;Ip6k1;Pik3cd;Ttc7b;Smg1;
GO:0006950	32	6	1.49772	4.00608	0.00645368	0.0394001	biological_process:response to stress	Mapk13;Rcan1;Map4k4;Glp1r;Map4k1;Smg1;
GO:0007257	32	6	1.49772	4.00608	0.00645368	0.0394001	biological_process:activation of JUN kinase activity	Ptpn1;Wnt7b;Trf;Dab2ip;Wnt5a;Zak;
GO:0016235	32	6	1.49772	4.00608	0.00645368	0.0394001	cellular_component:aggresome	Cabin1;Rnf32;Syne2;Sfmbt2;Urb2;Park2;
GO:0032147	32	6	1.49772	4.00608	0.00645368	0.0394001	biological_process:activation of protein kinase activity	Itgb3;Slc11a1;Tgfb2;Cks1brt;Camkk1;Insr;
GO:0048147	32	6	1.49772	4.00608	0.00645368	0.0394001	biological_process:negative regulation of fibroblast proliferation	Gstp1;Trim32;Dach1;Dab2ip;Cd300a;Nf1;
GO:0005777	129	14	6.0377	2.31877	0.0065315	0.0398442	cellular_component:peroxisome	Tkt;Acox2;Scp2;Atad1;Far1;Ccdc33;Acsl6;Far2;Acsbg1;Rida;Syt7;Gbf1;Szt2;Pex14;
GO:0005778	43	7	2.01256	3.47815	0.00661552	0.0402941	cellular_component:peroxisomal membrane	Pex14;Atad1;Pex5l;Ttc1;Far1;Map2k2;Arf1;
GO:0048706	43	7	2.01256	3.47815	0.00661552	0.0402941	biological_process:embryonic skeletal system development	Sulf1;Pax7;Wnt5a;Etl4;Dlx2;Fgf9;Pbx1;
GO:0042277	93	11	4.35276	2.52713	0.00699275	0.0425587	molecular_function:peptide binding	Itgb3;Dpp4;Ogt;Kcnj1;Ang;Nup98;Crhbp;Nln;Gss;Crhr1;Lvrn;
GO:0042169	33	6	1.54453	3.88468	0.00734301	0.0440471	molecular_function:SH2 domain binding	Crk;Afap1l2;Skap1;Ptk2;Dlc1;Dab1;
GO:0005160	44	7	2.05937	3.3991	0.00737715	0.0440471	molecular_function:transforming growth factor beta receptor binding	Bmp6;Tgfbr3;Tgfb2;Smad2;Gdnf;Bmp1;Smad3;
GO:0008374	44	7	2.05937	3.3991	0.00737715	0.0440471	molecular_function:O-acyltransferase activity	Gpam;Ykt6;Lpgat1;Pnpla3;Nat6;Hhat;Mboat2;
GO:0043966	44	7	2.05937	3.3991	0.00737715	0.0440471	biological_process:histone H3 acetylation	Brd1;Sap130;Elp3;Myog;Smarca4;Kat2b;Tada1;
GO:0001618	14	4	0.655254	6.1045	0.00740019	0.0440471	molecular_function:virus receptor activity	Xpr1;Dpp4;Hyal3;Ace2;
GO:0001817	14	4	0.655254	6.1045	0.00740019	0.0440471	biological_process:regulation of cytokine production	Csk;Elf1;Litaf;Iqgap1;
GO:0002064	14	4	0.655254	6.1045	0.00740019	0.0440471	biological_process:epithelial cell development	Muc2;B4galt1;Hydin;Slc4a5;
GO:0003351	14	4	0.655254	6.1045	0.00740019	0.0440471	biological_process:epithelial cilium movement	Dpcd;Dnah1;Ulk4;Ak7;
GO:0004705	14	4	0.655254	6.1045	0.00740019	0.0440471	molecular_function:JUN kinase activity	Alpk1;Alpk3;Adck5;Adrbk2;
GO:0004711	14	4	0.655254	6.1045	0.00740019	0.0440471	molecular_function:ribosomal protein S6 kinase activity	Alpk1;Alpk3;Adck5;Adrbk2;
GO:0010875	14	4	0.655254	6.1045	0.00740019	0.0440471	biological_process:positive regulation of cholesterol efflux	Pltp;Nr1h2;Ptch1;Abca12;
GO:0019789	14	4	0.655254	6.1045	0.00740019	0.0440471	molecular_function:SUMO transferase activity	Sumo3;Pias3;Pias1;Mdm2;
GO:0021819	14	4	0.655254	6.1045	0.00740019	0.0440471	biological_process:layer formation in cerebral cortex	Lrp8;Dab2ip;Gli3;Adgrg1;
GO:0022011	14	4	0.655254	6.1045	0.00740019	0.0440471	biological_process:myelination in peripheral nervous system	Sh3tc2;Pard3;Nf1;Adam22;
GO:0032793	14	4	0.655254	6.1045	0.00740019	0.0440471	biological_process:positive regulation of CREB transcription factor activity	Lrp8;Camk1d;Cacna1d;Crebbp;
GO:0043069	14	4	0.655254	6.1045	0.00740019	0.0440471	biological_process:negative regulation of programmed cell death	Kit;Dcps;Plcg2;Pax2;
GO:0043278	14	4	0.655254	6.1045	0.00740019	0.0440471	biological_process:response to morphine	Prkce;Gpi1;Ppp5c;Adra1b;
GO:0048771	14	4	0.655254	6.1045	0.00740019	0.0440471	biological_process:tissue remodeling	Chd7;Mmp14;Cspg4;Thbs4;
GO:0051279	14	4	0.655254	6.1045	0.00740019	0.0440471	biological_process:regulation of release of sequestered calcium ion into cytosol	Itgb3;Prkce;Ptk2b;Diaph1;
GO:0051895	14	4	0.655254	6.1045	0.00740019	0.0440471	biological_process:negative regulation of focal adhesion assembly	Mmp14;Dlc1;Rcc2;Bcas3;
GO:0060979	14	4	0.655254	6.1045	0.00740019	0.0440471	biological_process:vasculogenesis involved in coronary vascular morphogenesis	Fgf9;Pbrm1;Tgfbr3;Fgfr1;
GO:0098656	14	4	0.655254	6.1045	0.00740019	0.0440471	biological_process:anion transmembrane transport	Slc4a5;Oca2;Slc1a7;Slc4a8;
GO:0031526	68	9	3.18266	2.82782	0.00743881	0.0440471	cellular_component:brush border membrane	Gna12;B4galt1;Shank2;Gna13;Plb1;Trpm6;Lrp2;Cdhr5;Atp6v0a4;
GO:0050660	68	9	3.18266	2.82782	0.00743881	0.0440471	molecular_function:flavin adenine dinucleotide binding	Aifm2;Acox2;Txnrd2;Ndor1;Sardh;Foxred2;Mthfr;Txnrd1;Acad10;
GO:0003382	23	5	1.07649	4.64473	0.00743944	0.0440471	biological_process:epithelial cell morphogenesis	Flnb;Rab25;Palld;Bcl11b;Sipa1l3;
GO:0004114	23	5	1.07649	4.64473	0.00743944	0.0440471	molecular_function:3',5'-cyclic-nucleotide phosphodiesterase activity	Pde10a;Pde1c;Pde5a;Pde4d;Pde2a;
GO:0004181	23	5	1.07649	4.64473	0.00743944	0.0440471	molecular_function:metallocarboxypeptidase activity	Agbl1;Cpz;Agbl4;Agtpbp1;Ace2;
GO:0005086	23	5	1.07649	4.64473	0.00743944	0.0440471	molecular_function:ARF guanyl-nucleotide exchange factor activity	Amph;Iqsec1;Fnbp1;Gbf1;Arfgef3;
GO:0006891	23	5	1.07649	4.64473	0.00743944	0.0440471	biological_process:intra-Golgi vesicle-mediated transport	Copz1;Copg2;Trappc10;Rab6b;Cog5;
GO:0016239	23	5	1.07649	4.64473	0.00743944	0.0440471	biological_process:positive regulation of macroautophagy	Atg7;Rab12;Ulk1;Larp1;Supt5;
GO:0046488	23	5	1.07649	4.64473	0.00743944	0.0440471	biological_process:phosphatidylinositol metabolic process	Fig4;Plch2;Pip4k2a;Pitpnc1;Pip5k1b;
GO:0048041	23	5	1.07649	4.64473	0.00743944	0.0440471	biological_process:focal adhesion assembly	Ptk2b;Pxn;Dlc1;Rcc2;Tesk2;
GO:0048168	23	5	1.07649	4.64473	0.00743944	0.0440471	biological_process:regulation of neuronal synaptic plasticity	Kalrn;Camk2a;Cpeb1;Dlg4;Ephb2;
GO:0048854	23	5	1.07649	4.64473	0.00743944	0.0440471	biological_process:brain morphogenesis	Mkks;Ctnna2;Fancd2;Mllt4;Pax2;
GO:0070412	23	5	1.07649	4.64473	0.00743944	0.0440471	molecular_function:R-SMAD binding	Smad2;Zeb2;Ranbp3l;Smad3;Smad4;
GO:0070509	23	5	1.07649	4.64473	0.00743944	0.0440471	biological_process:calcium ion import	Cacna1c;Cacna1d;Cacna1a;Cacna1b;Cacnb2;
GO:0001227	56	8	2.62101	3.05225	0.00761383	0.0450117	molecular_function:DNA-binding transcription repressor activity, RNA polymerase II-specific	Dmbx1;Zeb1;Klf12;Glis1;Zeb2;Ppard;Nfatc3;Nfatc1;
GO:0043621	56	8	2.62101	3.05225	0.00761383	0.0450117	molecular_function:protein self-association	Ryr2;Ttn;Trim32;Zkscan17;Slc2a1;Ldb1;Atxn1;Dyrk1a;
GO:0006366	133	14	6.22491	2.24903	0.00768383	0.0453913	biological_process:transcription by RNA polymerase II	Hivep3;Taf4b;Tfap2b;Ldb1;Bcl11a;Thra;Smad3;Med13l;Gtf2a1l;Lcor;Ell;Zfp516;Gtf2h2;Zfp536;
GO:0009898	45	7	2.10617	3.32356	0.00820167	0.0482481	cellular_component:cytoplasmic side of plasma membrane	Pkp4;Traf2;Ptpn22;Map2k2;Npcd;Kit;Atp2b1;
GO:0034220	45	7	2.10617	3.32356	0.00820167	0.0482481	biological_process:ion transmembrane transport	Ryr2;Asic2;Kcnh1;Kcnk3;Slc24a2;Asic1;Trpm5;
GO:0006935	117	13	5.47605	2.37397	0.00829034	0.0482481	biological_process:chemotaxis	Lsp1;Ackr3;Flt1;Fpr1;Cmtm6;Pik3cd;Fer;Kit;Fes;Pdgfra;Robo1;Robo2;Pla2g6;
GO:0000062	34	6	1.59133	3.77043	0.00831745	0.0482481	molecular_function:fatty-acyl-CoA binding	Acox2;Scp2;Hadhb;Hadha;Acot7;Acad10;
GO:0001772	34	6	1.59133	3.77043	0.00831745	0.0482481	cellular_component:immunological synapse	Ptprj;Card11;Scimp;Ezr;Prkar1a;Cd6;
GO:0004180	34	6	1.59133	3.77043	0.00831745	0.0482481	molecular_function:carboxypeptidase activity	Cpz;Agbl4;Agtpbp1;Cpq;Ace2;Agbl1;
GO:0008306	34	6	1.59133	3.77043	0.00831745	0.0482481	biological_process:associative learning	Tnr;Gabra5;Glp1r;Shank1;Asic1;Rin1;
GO:0016592	34	6	1.59133	3.77043	0.00831745	0.0482481	cellular_component:mediator complex	Med12l;Ppargc1b;Med28;Ccnc;Med13l;Gli3;
GO:0048514	34	6	1.59133	3.77043	0.00831745	0.0482481	biological_process:blood vessel morphogenesis	Flt1;Sos1;Fgfr1;Col4a1;Epha2;Mkl2;
GO:0051453	34	6	1.59133	3.77043	0.00831745	0.0482481	biological_process:regulation of intracellular pH	Slc9a9;Slc9a8;Slc9a7;Slc9a1;Slc4a5;Slc4a8;
GO:0006302	57	8	2.66782	2.9987	0.00834877	0.0482481	biological_process:double-strand break repair	Rad21;Bre;Mta1;Eya3;Mre11a;Dclre1c;Eya1;Fam175a;
GO:0030175	57	8	2.66782	2.9987	0.00834877	0.0482481	cellular_component:filopodium	Myo10;Palld;Enah;Shtn1;Ppp1r9b;Ezr;Twf2;Npcd;
GO:0051607	135	14	6.31852	2.21571	0.00837992	0.0482481	biological_process:defense response to virus	Polr3g;Serinc5;Gpam;Ifna12;Tlr9;Atg7;Polr3e;Agbl4;Unc13d;Ncbp3;Tbk1;Oasl1;Polr3b;Eif2ak2;
GO:0004716	7	3	0.327627	9.15675	0.00847494	0.0482481	molecular_function:obsolete signal transducer, downstream of receptor, with protein tyrosine kinase activity	Insr;Erbb2;Kit;
GO:0005021	7	3	0.327627	9.15675	0.00847494	0.0482481	molecular_function:vascular endothelial growth factor-activated receptor activity	Flt1;Pdgfra;Nrp2;
GO:0015187	7	3	0.327627	9.15675	0.00847494	0.0482481	molecular_function:glycine transmembrane transporter activity	Slc6a5;Slc36a3;Slc36a2;
GO:0015280	7	3	0.327627	9.15675	0.00847494	0.0482481	molecular_function:ligand-gated sodium channel activity	Scnn1b;Asic1;Asic2;
GO:0015677	7	3	0.327627	9.15675	0.00847494	0.0482481	biological_process:copper ion import	Steap3;Slc31a1;Atp7b;
GO:0015824	7	3	0.327627	9.15675	0.00847494	0.0482481	biological_process:proline transport	Slc6a17;Slc36a4;Slc36a2;
GO:0019209	7	3	0.327627	9.15675	0.00847494	0.0482481	molecular_function:kinase activator activity	Tab1;Itsn1;Vac14;
GO:0021540	7	3	0.327627	9.15675	0.00847494	0.0482481	biological_process:corpus callosum morphogenesis	Szt2;Nin;Zeb2;
GO:0021955	7	3	0.327627	9.15675	0.00847494	0.0482481	biological_process:central nervous system neuron axonogenesis	Atg7;Ptk2;Prkca;
GO:0022038	7	3	0.327627	9.15675	0.00847494	0.0482481	biological_process:corpus callosum development	Ulk4;Ptprs;Ephb2;
GO:0030274	7	3	0.327627	9.15675	0.00847494	0.0482481	molecular_function:LIM domain binding	Ldb2;Mllt4;Ldb1;
GO:0031256	7	3	0.327627	9.15675	0.00847494	0.0482481	cellular_component:leading edge membrane	Epha2;Amph;Scimp;
GO:0032009	7	3	0.327627	9.15675	0.00847494	0.0482481	cellular_component:early phagosome	Syt7;Tlr9;Syt11;
GO:0032224	7	3	0.327627	9.15675	0.00847494	0.0482481	biological_process:positive regulation of synaptic transmission, cholinergic	Musk;Lama2;Ngfr;
GO:0032532	7	3	0.327627	9.15675	0.00847494	0.0482481	biological_process:regulation of microvillus length	Ezr;Twf2;Cdhr5;
GO:0034109	7	3	0.327627	9.15675	0.00847494	0.0482481	biological_process:homotypic cell-cell adhesion	Megf11;Ptpru;Ncam1;
GO:0036289	7	3	0.327627	9.15675	0.00847494	0.0482481	biological_process:peptidyl-serine autophosphorylation	Map2k2;Ripk1;Prkca;
GO:0042297	7	3	0.327627	9.15675	0.00847494	0.0482481	biological_process:vocal learning	Cntnap2;Foxp2;Nrxn2;
GO:0042490	7	3	0.327627	9.15675	0.00847494	0.0482481	biological_process:mechanoreceptor differentiation	Ntrk3;Myo7a;Ntrk2;
GO:0043931	7	3	0.327627	9.15675	0.00847494	0.0482481	biological_process:ossification involved in bone maturation	Ryr1;Thbs3;Sema4d;
GO:0044300	7	3	0.327627	9.15675	0.00847494	0.0482481	cellular_component:cerebellar mossy fiber	Dlg4;Dab2ip;Bin1;
GO:0045730	7	3	0.327627	9.15675	0.00847494	0.0482481	biological_process:respiratory burst	Slc11a1;Ncf1;Slc37a4;
GO:0048170	7	3	0.327627	9.15675	0.00847494	0.0482481	biological_process:positive regulation of long-term neuronal synaptic plasticity	Neurl1a;Kit;Ephb2;
GO:0048312	7	3	0.327627	9.15675	0.00847494	0.0482481	biological_process:intracellular distribution of mitochondria	Ogt;Cluh;Lrrk2;
GO:0048679	7	3	0.327627	9.15675	0.00847494	0.0482481	biological_process:regulation of axon regeneration	Map2k2;Ptprf;Map2k1;
GO:0048752	7	3	0.327627	9.15675	0.00847494	0.0482481	biological_process:semicircular canal morphogenesis	Zeb1;Chd7;Eya1;
GO:0048841	7	3	0.327627	9.15675	0.00847494	0.0482481	biological_process:regulation of axon extension involved in axon guidance	Plxna4;Plxna1;Plxnc1;
GO:0060290	7	3	0.327627	9.15675	0.00847494	0.0482481	biological_process:transdifferentiation	Lif;Smad3;Mef2c;
GO:0060440	7	3	0.327627	9.15675	0.00847494	0.0482481	biological_process:trachea formation	Mapk1;Map2k2;Map2k1;
GO:0060831	7	3	0.327627	9.15675	0.00847494	0.0482481	biological_process:smoothened signaling pathway involved in dorsal/ventral neural tube patterning	Ptch1;Gli3;Gli2;
GO:0071578	7	3	0.327627	9.15675	0.00847494	0.0482481	biological_process:zinc ion import across plasma membrane	Slc39a4;Slc39a8;Slc39a14;
GO:0072655	7	3	0.327627	9.15675	0.00847494	0.0482481	biological_process:establishment of protein localization to mitochondrion	Akt1;Ddit3;Hk2;
GO:0097062	7	3	0.327627	9.15675	0.00847494	0.0482481	biological_process:dendritic spine maintenance	Abl2;Tanc1;Itga3;
GO:0097105	7	3	0.327627	9.15675	0.00847494	0.0482481	biological_process:presynaptic membrane assembly	Ptprd;Nlgn2;Nlgn3;
GO:0097197	7	3	0.327627	9.15675	0.00847494	0.0482481	cellular_component:tetraspanin-enriched microdomain	Scimp;Tspan9;Tspan14;
GO:1900121	7	3	0.327627	9.15675	0.00847494	0.0482481	biological_process:negative regulation of receptor binding	Anxa2;Ptprf;Crtac1;
GO:1902894	7	3	0.327627	9.15675	0.00847494	0.0482481	biological_process:negative regulation of pri-miRNA transcription by RNA polymerase II	Ppara;Ppard;Nfatc3;
GO:0000776	118	13	5.52285	2.35386	0.00855097	0.0486457	cellular_component:kinetochore	Nup160;Mad1l1;Kif18a;Dync1i1;Sin3a;Tex14;Nup133;Nup98;Incenp;Kansl1;Ppp1r12a;Kat2b;Pbrm1;
GO:0001894	24	5	1.12329	4.4512	0.00866318	0.0490351	biological_process:tissue homeostasis	Col11a2;Trim32;Gnas;Nespas;Kcnj1;
GO:0007214	24	5	1.12329	4.4512	0.00866318	0.0490351	biological_process:gamma-aminobutyric acid signaling pathway	Gabra5;Gabrg3;Gabbr2;Phf24;Cacna1a;
GO:0017158	24	5	1.12329	4.4512	0.00866318	0.0490351	biological_process:regulation of calcium ion-dependent exocytosis	Syt2;Syt7;Syt17;Cacna1a;Syt1;
GO:0035904	24	5	1.12329	4.4512	0.00866318	0.0490351	biological_process:aorta development	Chd7;Smarca4;Lrp2;Tab1;Pde2a;
GO:0051019	24	5	1.12329	4.4512	0.00866318	0.0490351	molecular_function:mitogen-activated protein kinase binding	Ptprj;Stau2;Plcb4;Iqgap1;Tnip1;
GO:0060425	24	5	1.12329	4.4512	0.00866318	0.0490351	biological_process:lung morphogenesis	Stk40;Wnt7b;Map2k1;Map2k2;Mapk1;
GO:0071364	24	5	1.12329	4.4512	0.00866318	0.0490351	biological_process:cellular response to epidermal growth factor stimulus	Akt1;Iqgap1;Plcg1;Dab2ip;Erbb2;
GO:0000980	70	9	3.27627	2.74703	0.0087669	0.0495864	molecular_function:RNA polymerase II distal enhancer sequence-specific DNA binding	Esrrb;Zbtb16;Bach2;Chd4;Nfatc1;Pbx3;Smarca4;Smarcb1;Mef2c;
GO:0016429	83	10	3.88472	2.57419	0.00880921	0.0497898	molecular_function:tRNA (adenine-N1-)-methyltransferase activity	Prdm11;Mettl13;Trmt61a;Mettl8;Mettl22;Prdm10;Mettl16;Ehmt1;Prdm14;Alkbh8;
GO:0030308	119	13	5.56966	2.33408	0.0088361	0.0499058	biological_process:negative regulation of cell growth	Ptprj;Smarca2;Slit3;Tgfb2;Ppp1r9b;Smad4;Apbb2;Dact3;Dab2ip;Acvr1b;Smarca4;Ppard;Smad3;

## Sheet: Table S17
Supplementary Table S17 Gene Ontology enrichment analysis of differentially H3K27ac peak binding genes for BaP-NTD compared with BaP-nonNTD.
Term	Category	Observed	Expected	Fold change	P-value	Adjusted P-value	Term name	Gene list
GO:0016020	6889	539	172.313	3.12802	1.34377e-91	7.71996e-88	cellular_component:membrane	Tnfrsf13b;Scn5a;Stxbp5l;Cachd1;Cyb5r3;Serinc2;Ntrk2;Steap3;Grm4;Ano2;Kcnh1;Mst1r;Gbf1;Ndufs4;Xxylt1;Magi1;Ptprs;Myo5a;Rasa2;Eef2;Kcnip4;Mrc2;ND3;Vipr1;Ttc7b;Mboat1;Grik3;Sdk1;Kctd16;Cd200r2;Grin2b;Ext1;Coq6;Stam;Pag1;Gpc6;Stk32a;ND6;Atrnl1;Far2;Kcnq1;Cux1;Alg8;Gtpbp1;Syne1;Pcdha5;Pde4d;Chsy1;Slc39a3;Syk;Ggt7;Sctr;Arhgap21;Atp11a;Shank2;Dmpk;Robo2;Pard3b;Gtf3c1;Adcy1;Tmem56;Ano1;4932438A13Rik;Rnf1…
GO:0005737	6448	511	161.283	3.16835	2.77276e-89	7.96476e-86	cellular_component:cytoplasm	Sergef;Vps28;Stxbp5l;6330408A02Rik;Cyb5r3;Ttll11;Ntrk2;Steap3;Neil1;Utrn;Dnah17;Dnaic1;Sh3rf1;Mad1l1;l7Rn6;Sufu;Nln;Ppp1r14b;Rpp14;Ntn1;Magi1;Myo5a;Rasa2;Eef2;Kcnip4;Mdm1;Gck;Ttc7b;Rfwd2;Runx2;Serpinb6a;Stam;Reln;Cyhr1;Nsun2;Mapre3;Camta1;Kcnq1;Cux1;Gtpbp1;Rptor;Syne1;Nfatc2;Traf3ip1;Pde4d;Elmod3;Syk;Arhgap21;Shank2;Dmpk;Arhgef2;Meis2;Dnaaf3;Dtd1;Trp73;Adcy1;Ano1;Rnf130;Lima1;Eps8;Mvk;Snd1;Ankrd2…
GO:0005515	4471	381	111.832	3.40689	9.90202e-77	1.89624e-73	molecular_function:protein binding	Scn5a;Vps28;Cyb5r3;Ntrk2;Steap3;Ano2;Scn7a;Utrn;Dnah17;Sh3rf1;Sufu;Mpp2;Gbf1;Ntn1;Magi1;Baz1a;Ptprs;Myo5a;Eef2;Gck;Grik3;Rfwd2;Runx2;Cd200r2;Grin2b;Serpinb6a;Taf1b;Stam;Reln;Pag1;Cyhr1;Atrnl1;Mapre3;Rptor;Syne1;Nfatc2;Traf3ip1;Tsen34;Pde4d;Cacnb4;Syk;Sos1;Mxd1;Dmpk;Arhgef2;Trp73;Lima1;Eps8;Prdm16;Mapkbp1;Rfx4;Efna5;Snd1;Ankrd27;Lgr4;Zbtb7c;Cd244;Jmy;Sumf1;Tec;Sh3pxd2a;Xpo7;Spon2;Pcdh9;Cct8;Grin2a…
GO:0005886	3628	311	90.7465	3.42713	1.30321e-64	1.87173e-61	cellular_component:plasma membrane	Scn5a;Lingo1;Shroom2;Vps28;Gphn;Stxbp5l;Shc2;Ret;Ntrk2;Steap3;Grm4;Ano2;Kcnh1;Scn7a;Utrn;Mst1r;Flrt1;Nln;Magi1;Dpp6;Rasa2;Eef2;Kcnip4;Slc9a2;Lrba;Pi4ka;Nrg1;Vipr1;Pik3r5;Rasd1;Mdga2;Ttc7b;Grik3;Sdk1;Kctd16;Lepr;Grin2b;Pag1;Gpc6;Bfsp2;Cep89;Stk32a;Hcfc2;Atrnl1;Ptpro;Kcnq1;Nfatc2;Dgkb;Pde4d;Ppip5k1;Drd4;Slc39a3;Syk;Sos1;Paqr5;Alpl;Pttg1ip;Cdh10;Sctr;Arhgap21;Atp11a;Shank2;Dmpk;Kirrel3;Syn2;Dlg2;Kcn…
GO:0046872	2921	231	73.0624	3.16168	2.48753e-44	2.85817e-41	molecular_function:metal ion binding	Dyrk4;Gphn;Tatdn1;CYTB;Zfyve26;Adamts10;Parp1;Glo1;Steap3;Ppm1l;Ebf3;Sh3rf1;Naip1;Itpk1;Nln;Adam33;Baz1a;Rasa2;Kcnip4;Stk4;Mta1;Lmo2;Uba2;Map2k5;Rfwd2;Grin2b;Ext1;Taf1b;Reln;Zfp592;Cyhr1;Nudt5;Stk32a;Atrx;Dgkb;Pde4d;Pptc7;Chsy1;Alpl;Cdh10;Atp11a;Dmpk;Arhgef2;Acsm1;Cadps;Dtd1;Deaf1;Kcnma1;Trp73;Adcy1;Lcp1;Rnf130;Lima1;Prdm16;Abat;Fgd4;Zbtb7c;Trim29;Zfp74;Zmiz1;Adamts18;Dmrt1;Zfat;Trim44;Sumf1;Tec;…
GO:0016021	5354	334	133.919	2.49405	1.33114e-41	1.27456e-38	cellular_component:integral component of membrane	Tnfrsf13b;Scn5a;Stxbp5l;Cachd1;Serinc2;Ntrk2;Steap3;Grm4;Ano2;Kcnh1;Mst1r;Xxylt1;Ptprs;Olfr97;Mrc2;ND3;Vipr1;Mboat1;Grik3;Sdk1;Cd200r2;Grin2b;Ext1;Pag1;ND6;Atrnl1;Far2;Kcnq1;Cux1;Alg8;Syne1;Chsy1;Slc39a3;Ggt7;Sctr;Atp11a;Dmpk;Robo2;Adcy1;Tmem56;Ano1;4932438A13Rik;Rnf130;P2ry6;Col25a1;Lgr4;Sdc3;Atl1;E130311K13Rik;Pcsk5;Cd244;Syt14;Slc22a27;Slc10a7;Plb1;Grin2a;Hhat;Cacna1c;Adgrf4;Olfr970;Slc6a11;Tm…
GO:0005634	5759	350	144.049	2.42973	2.91745e-41	2.39439e-38	cellular_component:nucleus	Sergef;6330408A02Rik;Ercc6;Kcnh1;Neil1;Mlip;Mad1l1;l7Rn6;Sufu;Rpp14;Magi1;Baz1a;Eef2;Mdm1;Gck;Rfwd2;Runx2;Smc6;Taf1b;Ralyl;Suv420h1;Gpc6;Mipol1;Nsun2;Camta1;Cux1;Syne1;Nfatc2;Tsen34;Ctdspl2;Syk;Mxd1;Dmpk;Meis2;Gtf3c1;Dtd1;Trp73;Adcy1;4932438A13Rik;Rnf130;Prdm16;Rfx4;Tead3;Snd1;Rangap1;Zbtb7c;Lin54;Zfp74;Midn;Jmy;Xpo7;Mtus1;Pcgf5;Ttll5;Pax2;Cmip;Bin1;Lamb1;Arrb1;Esrrb;Gli2;Nosip;Tacc2;Hivep3;Nfatc…
GO:0005856	1093	123	27.339	4.49907	5.42474e-38	3.89564e-35	cellular_component:cytoskeleton	Tacc1;Shroom2;Fmn1;Gphn;Spire2;Bcas3;Zfyve26;Ttll11;Camk2b;Neil1;Synpo;Sept10;Clic5;Baiap2;Srcin1;Dnah17;Dnaic1;Mad1l1;Topbp1;Sipa1l1;Drc1;Ppp1r9a;Bsn;Pard3;Mta1;Frmd4a;Mdm1;Llgl1;Diaph1;Mark4;Cc2d2a;Epb41l4a;Myo18a;Osbpl10;Ank2;Kif18b;Bfsp2;Sfi1;Cep89;Nsun2;Mapre3;Alox8;Syne1;Mylk;Traf3ip1;Map6;Synj2;Pde4d;Elmod3;Cfap221;Ssh2;Cenpj;Arhgap21;Arhgef2;Ift43;Tnik;Shtn1;Herc2;Sntb1;Lcp1;Lima1;Kifc2;C…
GO:0000166	1853	164	46.3487	3.53839	8.91952e-38	5.69362e-35	molecular_function:nucleotide binding	Dyrk4;Gphn;Hspa12a;Ikbke;Ret;Ttll11;Tesk1;Ntrk2;Rab3c;Bcr;Camk2b;Akt1;Sept10;Nt5c2;Prkag2;Dnah17;Wrn;Camk1d;Naip1;Itpk1;Mst1r;Arl4d;Abcb9;Rps6kc1;Map3k5;Atp9a;Magi1;Fgfr3;Myo5a;Abcb5;Ulk4;Eef2;Myo1d;Rbm5;Oplah;Rhobtb1;Pi4ka;Stk4;Uba2;Rasd1;Gck;Agap1;Map2k5;Vars2;Riok1;Trpv4;Mark4;Speg;Atp11c;Smc6;Ralyl;Myo18a;Pgs1;Atp9b;Papss2;Kif18b;Stk32a;Entpd1;Tep1;Rps6ka4;Gtpbp1;Mylk;Atrx;Dgkb;Synj2;Ppip5k1;…
GO:0005524	1363	132	34.0925	3.87182	1.6616e-34	9.54592e-32	molecular_function:ATP binding	Dyrk4;Gphn;Hspa12a;Nav3;Ikbke;Ret;Ttll11;Tesk1;Ntrk2;Ercc6;Bcr;Camk2b;Akt1;Prkag2;Dnah17;Wrn;Camk1d;Naip1;Itpk1;Mst1r;Abcb9;Rps6kc1;Map3k5;Atp9a;Magi1;Fgfr3;Myo5a;Abcb5;Ulk4;Myo1d;Oplah;Pi4ka;Stk4;Uba2;Gck;Map2k5;Vars2;Runx2;Riok1;Nrbp2;Trpv4;Mark4;Speg;Atp11c;Smc6;Myo18a;Pgs1;Smchd1;Tbck;Atp9b;Papss2;Kif18b;Stk32a;Entpd1;Tep1;Rps6ka4;Mylk;Atrx;Dgkb;Ppip5k1;Dcakd;Syk;Mapk10;Ak7;Myo16;Atp11a;Dmpk;…
GO:0006810	1796	152	44.923	3.38357	2.62116e-33	1.36896e-30	biological_process:transport	Scn5a;Mcu;Stxbp5l;Spire2;Cachd1;Tmco3;CYTB;ATP8;Rab3c;Steap3;Ano2;Tom1l2;ND1;Kcnh1;Akt1;Clic5;Synrg;l7Rn6;Cacna1d;Abcb9;Ndufs4;Myo5a;Abcb5;Kcnip4;ATP6;ND3;Rabep1;Agap1;Grik3;Atg16l1;Ryr3;Rangrf;Nup133;Ap4s1;Sil1;Trpv4;Nup93;Ano4;Atp11c;Grin2b;Slc9a9;Scamp2;Kcng3;Stam;Dennd1a;Osbpl10;Laptm5;ND6;Stard3;Kcnq1;Cux1;COX1;ND4;Apba2;Map6;Slc39a3;Cacnb4;Atp6v0d1;Rims3;Scn10a;Exoc4;Ranbp3;Snx30;Atp11a;Atg…
GO:0030054	704	85	17.609	4.82707	6.31878e-29	3.02511e-26	cellular_component:cell junction	Arhgap44;Grid2;Shroom2;Dlgap2;Fmn1;Gphn;Bcr;Sv2b;Sdk2;Synpo;Ccdc85c;Grik4;Srcin1;Ptprr;l7Rn6;Nbea;Focad;Kcnb1;Flrt1;Tiam1;Sipa1l1;Disc1;Sh3pxd2a;Park2;Magi1;Grin2a;Hmcn2;Bsn;Pacsin1;Pard3;Gsg1l;Cacng8;Clmp;Arhgap26;Tjp2;Grik3;Sdk1;Cdk5rap2;Dmd;Trpv4;Kctd16;Sh3pxd2b;Grin2b;Specc1l;Dennd1a;Ank2;Ptprn2;Cdhr2;Unc5c;Rims4;Nrxn1;Ctnnd2;Fam129b;Grik5;Ston2;Magi2;Phactr1;Glra1;Rims3;Ssh2;Olfm1;Erc2;Arhga…
GO:0045202	489	69	12.2313	5.64128	2.23426e-27	9.8737e-25	cellular_component:synapse	Arhgap44;Grid2;Dlgap2;Sema4f;Gphn;Mgll;Ppfia4;Dgki;Dennd1a;Ush2a;Ephb2;Ank2;Bcr;Ptprn2;Sv2b;Kcnh1;Sdk2;Synpo;Unc5c;Sema4b;Grik4;Utrn;Srcin1;Rims4;Nrxn1;Pcdha4;Nbea;Grik5;Kcnb1;Ston2;Magi2;Phactr1;Adgrv1;Tiam1;Sipa1l1;Disc1;Park2;Glra1;Grin2a;Asic2;Rims3;Exoc4;Ppp1r9a;Bsn;Pacsin1;Olfm1;Erc2;Gsg1l;Cacng8;Clstn1;Shank2;Nrg1;Shisa9;Syn2;Dlg2;Cadps;Egflam;Grik3;Sdk1;Sntb1;Syt11;Ctnnb1;Eps8;Dmd;Kctd16;…
GO:0005829	1279	111	31.9914	3.46968	7.20981e-26	2.9586e-23	cellular_component:cytosol	Vps28;Plcb3;Dgki;Tha1;Ntrk2;Rab3c;Bcr;Camk2b;Akt1;Baiap2;Sh3rf1;l7Rn6;Tiam1;Nln;Map3k5;Ecscr;Myo5a;Scpep1;Ppp1r9a;Eef2;Kcnip4;Oplah;Plcb1;Uba2;Gck;Agap1;Ttc7b;Map2k5;Wdr77;Nrbp2;Smg6;Acot7;Plcg1;Ldha;Alox8;Sgta;Pde4b;Gtpbp1;Nfatc2;Traf3ip1;Phactr1;Ppip5k1;Ranbp3;Wwc2;Atg7;Pde9a;Trp73;Prkg1;Osbpl7;Wnk2;Lcp1;Mina;Mvk;Pdcd11;Fndc3a;Prkce;Pcbp3;Rangap1;Ftcd;Cryz;Hyal2;Ubash3a;Vps36;Ptpn5;Midn;Agbl4;N…
GO:0042995	694	79	17.3589	4.55098	1.44281e-25	5.52594e-23	cellular_component:cell projection	Trip10;Arhgap44;Gphn;Ccdc40;Fgd4;Ttll11;Ush2a;Palm;Atl1;Ksr1;Synpo;Baiap2;Srcin1;Dnah17;Dnaic1;Agbl4;Dnah12;Sh3rf1;Dnah8;Kcnb1;Flrt1;Ift122;Sh3pxd2a;Park2;Drc1;Cct8;Magi1;Cep104;Kcnip1;Bglap3;Ttll5;Pacsin1;Zfp385a;Arrb1;Slc6a11;Llgl1;Wipf1;Diaph1;Rp1l1;Bbs2;Trpv4;Mark4;Cc2d2a;Sh3pxd2b;Coq6;Elovl5;Osbpl3;Cntnap2;Kiz;Ephb2;Agbl2;Ppp1r16b;Plcg1;Il1rapl1;Cdhr2;Ctnnd2;Cfap52;Mylk;Traf3ip1;Synj2;Glra1;…
GO:0016740	1436	117	35.9184	3.25738	5.02233e-25	1.80333e-22	molecular_function:transferase activity	Dyrk4;Gphn;Ikbke;Ret;Parp1;Tesk1;Ntrk2;Bcr;Camk2b;Akt1;Camk1d;Itpk1;4930568D16Rik;Smyd4;Mst1r;Rps6kc1;Agpat9;Map3k5;Xxylt1;Fgfr3;Ulk4;Pi4ka;Stk4;Naa40;Gck;Mboat1;Map2k5;Riok1;Mark4;Speg;Ext1;Elovl5;Fut10;Pgs1;Csgalnact2;Suv420h1;Aprt;Setd2;Papss2;Stk32a;Nsun2;Alg8;Rps6ka4;Mylk;Dgkb;Chsy1;Ppip5k1;Sec1;Syk;Ggt7;Mogat1;Mapk10;Ak7;Fdft1;Ugp2;St8sia1;Dmpk;Lpcat1;Dpy19l3;Tnik;Prkg1;Wnk2;Rev1;Mvk;Prkce;…
GO:0043025	520	67	13.0067	5.15121	1.17302e-24	3.96411e-22	cellular_component:neuronal cell body	Shroom2;Gphn;Dgki;Ret;Ush2a;Scn8a;Ntrk2;ND1;Kcnh1;Lrp1;Ptpn5;Htr7;Baiap2;Srcin1;Naip1;Akap9;Kcnb1;Cacna1d;Tiam1;Sipa1l1;Slc6a3;Dpp6;Myo5a;Asic2;Ppp1r9a;Myo1d;Kcnip4;Bsn;Kcnip1;Pard3;Zfp385a;Cacna1c;Vti1a;Gfra1;Itpr3;Brinp2;Elovl5;Prkca;Reln;Dennd1a;Ephb2;Kcnn2;Entpd1;Nrxn1;Igf1r;Rptor;Grik5;Klhl14;Drd4;Glra1;Esr2;Sos1;Exoc4;Cacna1g;Olfm1;Erc2;Pawr;Shank2;Arhgef2;Dlg2;Rapgef4;Kcnma1;Pcsk2;Lamp1;Ka…
GO:0005794	1151	102	28.7897	3.54293	1.37982e-24	4.40392e-22	cellular_component:Golgi apparatus	Clic5;Sh3rf1;Synrg;Topbp1;4930568D16Rik;Gbf1;Atp9a;Fgfr3;Myo5a;Lrba;Dusp10;Llgl1;Man2a1;Glb1;Wdr77;Cdk5rap2;Sulf2;Ap4s1;Ext1;Coq6;Fut10;Scamp2;Myo18a;Cntnap2;Csgalnact2;Atp9b;Adam19;Tbc1d14;App;Cux1;Syne1;Spata16;Map6;Chsy1;Sec1;Exoc4;Golga4;St8sia1;Arhgap21;Mecom;Clstn1;Arhgef2;Lpcat1;Kcnj6;Pde9a;Trp73;Prkg1;Cwc22;Fndc3a;Man1c1;Trip10;Prkce;Bend5;Atl1;Ftcd;Pcsk5;Grhl1;Galnt13;Aktip;Agbl4;Akap9;N…
GO:0043005	416	60	10.4053	5.76628	1.66188e-24	5.025e-22	cellular_component:neuron projection	Ankrd27;Abat;Prkca;Sdc3;Reln;Grm4;Sv2b;Plcg1;Unc5c;Baiap2;Entpd1;Srcin1;Wrn;App;Igf1r;Naip1;Ctnnd2;Cux1;Grik5;Kcnb1;Ston2;Magi2;Anks1;Sipa1l1;Slc6a3;Gnao1;Klhl14;Pdzd2;Park2;Glra1;Atp6v0d1;Esr2;Grin2a;Myo5a;Asic2;Mapk10;Rap1gap2;Exoc4;Ppp1r9a;Myo1d;Bsn;Bptf;Pacsin1;Erc2;Pawr;Gpr1;Shank2;Slc6a11;Cdh13;Diaph1;ND5;Ctnnb1;Eps8;Mark4;Kalrn;Iqgap1;Acot7;Grin2b;Pacrg;Pgr;
GO:0014069	209	44	5.22768	8.41674	4.31282e-24	1.23886e-21	cellular_component:postsynaptic density	Grid2;Grin2a;Mapk10;Sos1;Exoc4;Ppp1r9a;Bsn;Dgki;Palm;Erc2;Cacng8;Clstn1;Shank2;ND2;Ntrk2;Arhgef2;Ank2;Bcr;Dclk1;Erbb4;Camk2b;Cacna1c;Plcb4;Syn2;Dlg2;Baiap2;Arrb1;Entpd1;Srcin1;Ctnnd2;Sorcs3;Pde4b;Syt11;Grik5;Magi2;Sipa1l1;Eps8;Disc1;Kalrn;Pdzd2;Dnm3;Park2;Grin2b;Rgs19;
GO:0070062	2579	163	64.508	2.52682	7.27747e-23	1.99091e-20	cellular_component:extracellular exosome	Shroom2;Vps28;Serinc2;Glo1;Tom1l2;Ppm1l;Utrn;l7Rn6;Dpp6;Ptprs;Myo5a;Scpep1;Eef2;Bptf;Pi4ka;Glb1;Sdk1;Col12a1;Taf6l;Crispld2;Serpinb6a;Taf1b;Scamp2;Aprt;Nudt5;Ptpro;Capn5;Opcml;Abhd6;Alpl;Pttg1ip;Robo2;BC051628;Acsm1;Kcnma1;Adcy1;Ano1;Lcp1;Eps8;Mvk;Man1c1;Trip10;Snd1;Abat;Col8a1;Acpp;Isoc1;Cryz;Arhgap23;Rars;Krt78;Spon2;Cct8;Ptgs1;Alk;Anxa8;Vps13d;Fkbp5;Col14a1;Lamb1;Dpys;Arl15;C2;Rp1l1;Dnm3;Grb2;…
GO:0016787	1514	115	37.8694	3.03675	2.09523e-22	5.47142e-20	molecular_function:hydrolase activity	Tatdn1;Plcb3;Adamts10;Fuca2;Ppm1l;Neil1;Nt5c2;Wrn;Itpk1;Nln;Atp9a;Idua;Adam33;Rpp14;Por;Ptprs;Scpep1;Oplah;Plcb1;Adamts12;Dusp10;Man2a1;Glb1;Dpp8;Sulf2;Smg6;Atp11c;Acot7;Reln;Tmprss11e;Atp9b;Adam19;Ptprn2;Plcg1;Nudt5;Entpd1;Ptpro;Capn5;Pop7;Manba;Atrx;Abhd6;Synj2;Pde4d;Pptc7;Ctdspl2;Metap1d;Ggt7;Alpl;Spaca5;Ssh2;Gzmk;Atp11a;C1rb;Pde9a;Dtd1;Ptprq;Pcsk2;Ptpre;Atl1;Acpp;Hyal2;Pcsk5;Nudt16;Ptpn5;Adam…
GO:0016310	608	67	15.2078	4.40564	2.56026e-21	6.39509e-19	biological_process:phosphorylation	Prkce;Dyrk4;Tnni3k;Tie1;Ikbke;Ret;Tesk1;Ntrk2;Bcr;Dclk1;Camk2b;Akt1;Pip4k2a;Camk1d;Itpk1;Mst1r;Rps6kc1;Tec;Map3k5;Alk;Fgfr3;Ulk4;Uck2;Pi4ka;Stk4;Gck;Map2k5;Nme7;Riok1;Nol9;Prkd1;Mark4;Speg;Prkca;Wnk1;Ephb2;Papss2;Erbb4;Stk32a;Igf1r;Rps6ka4;Map4k3;Mylk;Ak5;Pak4;Ror2;Dgkb;Tesk2;Ppip5k1;Taok1;Camkk2;Syk;Mapk10;Ak7;Dmpk;Cdc42bpb;Tnik;Prkg1;Stat3;Phkg2;Wnk2;Map2k6;Rps6ka5;Hunk;Mvk;Kalrn;Adk;
GO:0016301	613	66	15.3329	4.30448	1.49793e-20	3.58567e-18	molecular_function:kinase activity	Prkce;Dyrk4;Tnni3k;Tie1;Ikbke;Ret;Tesk1;Ntrk2;Bcr;Dclk1;Camk2b;Akt1;Pip4k2a;Camk1d;Itpk1;Mst1r;Rps6kc1;Tec;Map3k5;Alk;Fgfr3;Ulk4;Uck2;Pi4ka;Stk4;Gck;Map2k5;Nme7;Riok1;Nol9;Prkd1;Mark4;Speg;Prkca;Wnk1;Ephb2;Papss2;Erbb4;Stk32a;Igf1r;Rps6ka4;Map4k3;Mylk;Ak5;Pak4;Ror2;Dgkb;Tesk2;Ppip5k1;Taok1;Camkk2;Syk;Mapk10;Ak7;Dmpk;Cdc42bpb;Tnik;Prkg1;Phkg2;Wnk2;Map2k6;Rps6ka5;Hunk;Mvk;Kalrn;Adk;
GO:0030425	438	55	10.9556	5.02026	3.89818e-20	8.95801e-18	cellular_component:dendrite	Fat3;Dlgap2;Gphn;Prkca;Rangap1;Reln;Dennd1a;Ret;Scn8a;Ephb2;Ntrk2;Il1rapl1;ND1;Kcnh1;Camk2b;Lrp1;Plcb4;Synpo;Htr7;Grik4;Srcin1;Agtr1a;Rptor;Grik5;Kcnb1;Magi2;Cacna1d;Gnao1;Drd4;Ppp1r9a;Kcnip4;Bsn;Kcnip1;Bglap3;Cacna1g;Bptf;Nell2;Zfp385a;Nrg1;Opa1;Kirrel3;Cacna1c;Dlg2;Kcnj6;Rapgef4;Grik3;Kcnma1;Pcsk2;Itpr3;Lamp1;Htr1f;Brinp2;Ago2;Psd2;Pgr;
GO:0007275	1018	86	25.463	3.37744	6.82311e-20	1.50765e-17	biological_process:multicellular organism development	Shroom2;Fat3;Lgr4;Hoxa3;6330408A02Rik;Dcc;Ntrk2;Casz1;Dclk1;Klhl40;Grhl1;Akt1;Sema5b;Lrp1;Ebf3;Ccdc85c;Dmrt1;Boll;Sufu;Flrt1;Wipf3;Ntng1;Ift122;Gas7;Disc1;Ecscr;Dcaf7;Tcf15;Pax7;Nsd1;Hhat;Pax2;Bin1;Fancd2;Metrn;Gli2;Nosip;Bmp1;Kif26b;Lrp5;Sema4f;Slit3;Reln;Tnfrsf11a;Akirin2;Lmx1b;Ephb2;Erbb4;Eya2;Wnt2b;Prox1;Sim2;Dazap1;Unc5c;Pou6f2;Bmp5;Sema4b;Ctnnd2;Cux1;Kdm1a;Spata16;Adgrv1;Rfx6;Ror2;Spata5;Bz…
GO:0006811	575	61	14.3824	4.2413	7.31939e-19	1.5574e-16	biological_process:ion transport	Scn5a;Grid2;Mcu;Cachd1;Tmco3;Scn8a;ATP8;Cacna1e;Steap3;Ano2;Kcnh1;Clic5;Grik4;Slc10a7;Kcnb1;Cacna1d;Mcoln2;Atp6v0a2;Grin2a;Asic2;Kcnip4;Kcnip1;ATP6;Cacng8;Cacna2d4;Kcnk13;Cacna1c;Tmc3;Slc22a15;Grik3;Ryr3;Itpr3;Trpv4;Grin2b;Slc5a6;Slc9a9;Kcng3;Wnk1;Kcnh8;Kcnn2;Atp5g1;Best3;Kcnq1;Tpcn2;Grik5;Cacnb4;Glra1;Slc39a3;Atp6v0d1;Scn10a;Piezo2;Slc5a3;Ryr1;Kcnj6;Nalcn;Kcnma1;Ano1;Slc12a9;Sfxn5;Gabrg3;Slc4a11;
GO:0006355	2031	129	50.801	2.53932	9.26275e-19	1.90052e-16	biological_process:regulation of transcription, DNA-templated	Bcas3;Myrfl;Parp1;Ybx3;Casz1;Hnf1b;Ebf3;Ssbp3;Med13l;Rgs19;Baz1a;Zfp488;Pax7;Bptf;Mta1;Snapc1;Mta3;Gtf2a1l;Lef1;Runx2;Nup133;Atxn1;Taf1b;Suv420h1;Akirin2;Zfp592;Setd2;Lmx1b;Prox1;Camta1;Cux1;Rps6ka4;Nfatc2;Zfp583;Sbno2;Rfx6;Atrx;Smad2;Tnip2;Sox5;Zfp292;Mxd1;Meis2;Mnat1;Deaf1;Trp73;Ikzf3;Mina;Prdm16;Zfp516;Rfx4;Tead3;Snd1;Hoxa3;Bend5;Sertad2;Med27;Taf4b;Lin54;Mxi1;Grhl1;Foxn3;Zfp74;Zmiz1;Vps36;Dmr…
GO:0006351	1827	119	45.6984	2.60403	2.79012e-18	5.52733e-16	biological_process:transcription, DNA-templated	Bcas3;Parp1;Ybx3;Casz1;Hnf1b;Ebf3;Ssbp3;Med13l;Baz1a;Zfp488;Pax7;Bptf;Mta1;Snapc1;Gtf3c2;Gtf2a1l;Lef1;Runx2;Atxn1;Taf1b;Suv420h1;Akirin2;Zfp592;Setd2;Lmx1b;Prox1;Camta1;Cux1;Nfatc2;Zfp583;Sbno2;Rfx6;Atrx;Smad2;Tnip2;Sox5;Zfp292;Mxd1;Ablim2;Meis2;Mnat1;Gtf3c1;Deaf1;Trp73;Ikzf3;Mina;Prdm16;Zfp516;Rfx4;Tead3;Snd1;Hoxa3;Bend5;Sertad2;Med27;Taf4b;Lin54;Mxi1;Grhl1;Foxn3;Zfp74;Zmiz1;Vps36;Dmrt1;Rfx8;Zfa…
GO:0005096	229	38	5.72793	6.63415	5.68137e-18	1.08798e-15	molecular_function:GTPase activator activity	Arhgap44;Ankrd27;Elmod3;Stxbp5l;Rap1gap2;Rangap1;Rasa2;Arhgap25;Arhgap15;Tbck;Arap1;Plcb1;Dock1;Arhgap21;Tbc1d1;Bcr;Prr5;Rabep1;Ralgapb;Arhgap23;Sgsm1;Arrb1;Tbc1d14;Arhgap26;Sipa1l2;Sh3bgrl3;Llgl1;Depdc5;Arhgap27;Agap1;Ric8b;Rgs3;Tbc1d5;Srgap1;Sipa1l1;Rin2;Rgs19;Evi5l;
GO:0019901	429	51	10.7305	4.75281	6.55959e-18	1.21564e-15	molecular_function:protein kinase binding	Prkce;Scn5a;Kif14;Wnk1;Parp1;Kiz;Sash1;Cep152;ND2;Plcg1;Tom1l2;Kcnh1;Camk2b;Akt1;Ppp1r12b;Ptpn5;Tbc1d14;Utrn;Prkag2;Srcin1;Agtr1a;Ptprr;Sufu;Nbea;Rptor;Tpcn2;Sipa1l1;Rffl;Map3k5;Tnip2;Taok1;Park2;Cacnb4;Rgs19;Grin2a;Syk;Ppp1r9a;Eef2;Cenpj;Cadps;Llgl1;Trp73;Stat3;Faf1;Cdk5rap2;Map2k6;Ctnnb1;Trpv4;Cdk5rap3;Iqgap1;Grb2;
GO:0030533	28	18	0.700359	25.7011	1.50982e-17	2.71059e-15	molecular_function:triplet codon-amino acid adaptor activity	TrnM;TrnN;TrnL2;TrnI;TrnS2;TrnY;TrnT;TrnA;TrnG;TrnQ;TrnR;TrnC;TrnW;TrnK;TrnD;TrnS1;TrnE;TrnH;
GO:0004672	511	55	12.7815	4.30308	1.93035e-17	3.36057e-15	molecular_function:protein kinase activity	Prkce;Fastkd1;Dyrk4;Tnni3k;Tie1;Prkca;Wnk1;Ikbke;Ret;Tbck;Tesk1;Ephb2;Ntrk2;Ksr1;Dclk1;Erbb4;Camk2b;Akt1;Stk32a;Fastkd2;Camk1d;Igf1r;Rps6ka4;Map4k3;Mylk;Mst1r;Pak4;Ror2;Rps6kc1;Tec;Tesk2;Map3k5;Taok1;Alk;Camkk2;Fgfr3;Syk;Mapk10;Ulk4;Dmpk;Cdc42bpb;Stk4;Tnik;Map2k5;Prkg1;Phkg2;Wnk2;Map2k6;Nrbp2;Rps6ka5;Hunk;Prkd1;Mark4;Kalrn;Speg;
GO:0005654	1646	109	41.1711	2.64749	2.13799e-17	3.61257e-15	cellular_component:nucleoplasm	Zfp438;Tatdn1;Plcb3;Dgki;Parp1;Ercc6;Casz1;Ano2;Hnf1b;Utrn;Wrn;Sufu;Anks1;Dcaf7;Magi1;Rbm5;Bptf;Mta1;Uba2;Dusp10;Gck;Ttc37;Arhgap27;Rfwd2;Wdr77;Dpp8;Rgs3;Rangrf;Runx2;Pum3;Acot7;Atxn1;Smc6;Scamp2;Myo18a;Aprt;Dock1;Cyhr1;Pogz;Hcfc2;Rps6ka4;Rptor;Syne1;Nfatc2;Spidr;Ctnnbl1;Ctdspl2;Ppip5k1;Tnip2;Arid1b;Necab1;Ranbp3;Myo16;Golga4;Mecom;Bard1;Mnat1;Wbp11;Tnik;Deaf1;Trp73;Prkg1;Cwc22;Trip10;Hoxa3;Taf4b…
GO:0030424	333	44	8.32927	5.28258	3.34232e-17	5.48619e-15	cellular_component:axon	Prkca;Mgll;Sdc3;Reln;Ret;Palm;Dcc;Ephb2;Ntrk2;Kcnh1;Synpo;Ptpn5;Grik4;Srcin1;App;Igf1r;Grik5;Kcnb1;Slc6a3;Disc1;Drd4;Alk;Myo5a;Scn10a;Myo1d;Bsn;Olfm1;Pawr;Ap3d1;Nrg1;Gsto1;Kirrel3;Bin1;Kcnj6;Llgl1;Rapgef4;Shtn1;Grik3;Gfra1;Adgrl3;Syt11;Iqgap1;Dnm3;Pgr;
GO:0045944	971	78	24.2874	3.21154	4.07473e-17	6.5026e-15	biological_process:positive regulation of transcription by RNA polymerase II	Tead3;Bcas3;Zbtb7c;Parp1;Hyal2;Grhl1;Hnf1b;Akt1;Ebf3;Ssbp3;Zmiz1;Dmrt1;Ldb2;Park2;Pcgf5;Pax7;Nrg1;Lmo2;Pax2;Sgsm1;Arrb1;Esrrb;Map2k5;Lef1;Gli2;Runx2;Prkd1;Glis1;Atxn1;Pgr;Lrp5;Nfatc3;Akirin2;Lmx1b;Glis3;Igf2;Prox1;Bmp5;App;Creb3l3;Camta1;Kdm1a;Maml2;Rps6ka4;Stat5b;Nfatc2;Sbno2;Hfe2;Rfx6;Atrx;Pknox1;Tfdp1;Smad2;Tnip2;Npas2;Esr2;Sox5;Zfp292;Mecom;Arhgef2;Ablim2;Meis2;Mnat1;Auts2;Cdh13;Deaf1;Rarb;Tr…
GO:0048471	547	56	13.682	4.09297	7.45054e-17	1.15685e-14	cellular_component:perinuclear region of cytoplasm	Prkce;Rangap1;Dgki;Hyal2;Rab3c;Kcnh1;Lrp1;Flrt1;Disc1;Atp9a;Park2;Fgfr3;Bptf;Pacsin1;Vti1a;Lamb1;Vldlr;Rasd1;Ryr3;Faf1;Cdk5rap2;Atraid;Itpr3;Pkhd1;Ptprm;Dnm3;Prkca;Pde4a;Atxn2;Akap6;Atp9b;Ank2;Ppp1r16b;Zdhhc8;App;Ctif;Pde4b;Syne1;Magi2;Adgrv1;Map6;Synj2;Esr2;Dgat2;Cacna1g;Myo16;Cdh13;Tnik;Depdc5;Shtn1;Kcnma1;Lamp1;Galnt2;Ctnnb1;Kalrn;Sept9;
GO:0005739	1679	109	41.9965	2.59545	8.08311e-17	1.22204e-14	cellular_component:mitochondrion	Mcu;Cyb5r3;CYTB;Parp1;ATP8;ND1;Gm6559;Akt1;Bbc3;TrnA;Atpaf2;Gbf1;Ndufs4;TrnG;Nln;Rpp14;Por;ATP6;ND3;Ogdh;Gck;Vars2;TrnE;Lrp5;Coq6;Mrps6;Slit3;TrnD;Pgs1;Cep89;Fastkd2;ND6;Ldha;Stard3;COX1;ND4;Abhd6;Pptc7;Metap1d;Dcakd;Mapk10;Dmpk;Acsm1;Slc25a21;TrnQ;Kcnma1;COX3;Nipsnap1;Prkce;Snd1;Abat;Them7;Apopt1;Fdx1;ND2;Cisd3;TrnR;TrnI;Rars;Micu2;TrnY;Disc1;Park2;TrnS1;1600014C10Rik;Mtus1;TrnM;Synj2bp;TrnH;Slc…
GO:0006414	46	20	1.15059	17.3824	8.61026e-17	1.26836e-14	biological_process:translational elongation	TrnN;TrnL2;TrnS2;TrnY;TrnG;TrnA;TrnQ;TrnR;TrnW;TrnD;Eef2;TrnE;TrnM;TrnI;Gtpbp1;TrnT;TrnC;TrnK;TrnS1;TrnH;
GO:0006468	566	56	14.1573	3.95557	2.87541e-16	4.12981e-14	biological_process:protein phosphorylation	Prkce;Dyrk4;Tnni3k;Tie1;Ikbke;Ret;Tesk1;Ntrk2;Bcr;Ksr1;Dclk1;Camk2b;Akt1;Camk1d;Mst1r;Rps6kc1;Tec;Map3k5;Alk;Fgfr3;Ulk4;Stk4;Map2k5;Nrbp2;Prkd1;Mark4;Speg;Prkca;Wnk1;Tbck;Ephb2;Erbb4;Stk32a;App;Igf1r;Rps6ka4;Map4k3;Mylk;Pak4;Ror2;Tesk2;Smad2;Taok1;Camkk2;Syk;Mapk10;Dmpk;Cdc42bpb;Tnik;Prkg1;Phkg2;Wnk2;Map2k6;Rps6ka5;Hunk;Kalrn;
GO:0007165	1216	87	30.4156	2.86038	4.36515e-16	6.11654e-14	biological_process:signal transduction	Plcb3;Grm4;Bcr;Tom1l2;Akt1;Ppp1r12b;Tiam1;Rps6kc1;Rasa2;Lrba;Plcb1;Calcrl;Stk4;Vipr1;Rasd1;Arhgap27;Rgs3;Lepr;Ank2;Rassf8;Plcg1;Wnt2b;Tas1r3;Pde4d;Gpr39;Drd4;Gng7;Mras;Sctr;Arhgap21;Pde9a;Unc5d;Prkg1;Gng4;Zfp516;P2ry6;Arhgap44;Lgr4;Rangap1;S1pr2;Arhgap23;Htr7;Akap9;Trhde;Alk;Arhgap25;Arhgap15;Pacsin1;Gpr139;Adgrf4;Arrb1;Arhgap26;Spock1;Htr1f;Iqgap1;Olfr655;Ptprm;Ppp1r1a;Gna12;Hivep3;Pde4a;Arap1;I…
GO:0005783	1286	90	32.1665	2.79794	4.82991e-16	6.57051e-14	cellular_component:endoplasmic reticulum	Scn5a;Cyb5r3;Ubxn4;Flrt1;Agpat9;Map3k5;Xxylt1;Rasgrf2;Ubac2;Fgfr3;Por;Myo5a;Lrba;Rnf139;Calcrl;Tmem117;Fam69b;Mboat1;Ryr3;Pcdha2;Sulf2;Sil1;Atp11c;Pum3;Lrp5;Ext1;Sema4f;Elovl5;Kcng3;Pgs1;Hacd4;Cyp2b19;Far2;Mctp1;Pcdha4;Kcnq1;Alg8;Ddrgk1;Pdzd2;Mogat1;Fdft1;Olfm1;Atp11a;Clstn1;Dmpk;Lpcat1;Pde9a;Kcnma1;Slc37a1;Man1c1;Pcdha1;Prkce;Jph1;Atl1;Ftcd;Ksr1;Ptpn5;Tm7sf2;Sumf1;Disc1;Park2;Ptgs1;Grin2a;160001…
GO:0035556	378	45	9.45484	4.75946	4.91787e-16	6.57051e-14	biological_process:intracellular signal transduction	Ppp1r1a;Prkce;Gna12;Prkca;Shc2;Plcb3;Wnk1;Pag1;Akap6;Bcr;Ksr1;Dclk1;Plcg1;Akt1;Stk32a;Prkag2;Dmrt1;Spsb1;Rps6ka4;Map4k3;Dgkb;Tiam1;Nrg2;Tec;Smad2;Syk;Rasa2;Plcb1;Arhgef2;Cdc42bpb;Stk4;Gab2;Tnik;Depdc5;Rapgef4;Vav2;Adcy1;Wnk2;Nrbp2;Rp1l1;Rps6ka5;Hunk;Prkd1;Asb18;Kalrn;
GO:0003677	1713	107	42.8469	2.49726	2.22451e-15	2.90451e-13	molecular_function:DNA binding	Myrfl;Parp1;Ybx3;Ercc6;Casz1;Neil1;Hnf1b;Ebf3;Ssbp3;Wrn;Topbp1;Eepd1;Zfp488;Pax7;Mta1;Lmo2;Snapc1;Gtf3c2;Mta3;Gtf2a1l;Lef1;Runx2;Smg6;Pum3;Atxn1;Taf1b;Zfp592;Lmx1b;Prox1;Pogz;App;Camta1;Cux1;Nfatc2;Zfp583;Rfx6;Atrx;Smad2;Sos1;Sox5;Zfp292;Mxd1;Ssh2;Mecom;Meis2;Gtf3c1;Dtd1;Deaf1;Trp73;Ikzf3;Rev1;Prdm16;Zfp516;Rfx4;Tead3;Pcbp3;Hoxa3;Bend5;Taf4b;Lin54;Mxi1;Grhl1;Foxn3;Zfp74;Dmrt1;Rfx8;Zmat4;Zfat;Zfp6…
GO:0007155	470	49	11.756	4.16808	2.98872e-15	3.8156e-13	biological_process:cell adhesion	Prkce;Fat3;Prkca;Sdc3;Cntnap2;Col8a1;Reln;Itgad;Ret;Klra7;Lmln;Cdhr2;Sdk2;Itga9;App;Nrxn1;Itga2b;Ctnnd2;Klra1;Lsamp;Cntn6;Flrt1;Tnfaip6;Spon2;Pcdha3;Col5a1;Ptprs;Plcb1;Cdh10;Clstn1;Lama2;Radil;Kirrel3;Nedd9;Col14a1;Lamb1;Pecam1;Cdh13;Parvb;Sdk1;Col12a1;Sspo;Ctnnb1;Ctnna3;Ncan;Plpp3;Col15a1;Ptprm;Specc1l;
GO:0007399	369	43	9.22973	4.65886	4.16961e-15	5.20748e-13	biological_process:nervous system development	Sema4f;Slit3;Ret;Dcc;Ephb2;Ntrk2;Dclk1;Erbb4;Camk2b;Akt1;Sema5b;Sim2;Sema4b;App;Camk1d;Magi2;Adgrv1;Cntn6;Ntng1;Gas7;Disc1;Rbfox1;Alk;Srrm4;Bzw2;Olfm1;Nrg1;Robo2;Dlg2;Metrn;Tnik;Deaf1;Gfra1;Pcsk2;Nrbp2;Ctnnb1;Prkd1;Dpf3;Mark4;Kalrn;Igf1;Nav1;Efna5;
GO:0005509	585	54	14.6325	3.69042	1.27805e-14	1.56222e-12	molecular_function:calcium ion binding	Man1c1;Fat3;Plcb3;Ret;Cacna1e;Lrp1;Syt14;Micu2;Pls1;Myo5a;Hmcn2;Kcnip4;Kcnip1;Bglap3;Lrp1b;Anxa8;Plcb1;Nell2;Slc25a12;Astn2;Vldlr;Ryr3;Spock1;Itpr3;Sulf2;Bmp1;Slit3;Plcg1;Cdhr2;Mctp1;Nrxn1;Alox8;Rph3al;Adgrv1;Dgkb;Myl2;Fbln2;Camkk2;Necab1;Vwce;Cdh10;Clstn1;C1rb;Ryr1;Lpcat1;Cadps;Cdh13;Ltbp2;Egflam;Adgrl3;Adgre1;Lcp1;Clgn;Ncan;
GO:0003779	333	40	8.32927	4.80234	1.46208e-14	1.74993e-12	molecular_function:actin binding	Shroom2;Fmn1;Spire2;Fgd4;Sntg2;Mprip;Synpo;Utrn;Jmy;Syne1;Synpo2;Mylk;Phactr1;Wipf3;Pls1;Nrap;Park2;Myo5a;Klhl3;Myo1d;Ssh2;Myo16;Pawr;Ablim2;Myh11;Fmnl3;Eps8l1;Parvb;Wipf1;Daam1;Kcnma1;Spire1;Sntb1;Diaph1;Lcp1;Lima1;Eps8;Dmd;Trpv4;Pacrg;
GO:0005768	535	51	13.3819	3.81113	2.11366e-14	2.47816e-12	cellular_component:endosome	Arhgap44;Ankrd27;Vps28;Exph5;Ret;Ntrk2;Steap3;Kcnh1;Lrp1;Vps36;Wdfy2;Grap2;Dscr3;Rffl;Atp9a;Atp6v0a2;Pacsin1;Calcrl;Astn2;Rabep1;Llgl1;Arhgap27;Clvs1;Tbc1d5;Ldlrad4;Grb2;March1;Slc9a9;Scamp2;Stam;Vps45;Atp9b;Lamp2;Rasgef1b;Mgrn1;Osbpl11;Agtr1a;App;Stard3;Kcnq1;Magi2;Wdr48;Exoc4;Rab31;Snx30;Atp11a;Sh3gl1;Tnik;Osbpl9;Pmepa1;Lamp1;
GO:0005874	308	38	7.70395	4.93254	3.02181e-14	3.47206e-12	cellular_component:microtubule	Trip10;Eml4;Shroom2;Kif14;Ttll11;Ttl;Kif18b;Mapre3;Dnah17;Dnaic1;Dnah12;Dnah8;Tiam1;Haus8;Map6;Disc1;Cct8;Mid1;Tubgcp6;Ttll5;Fign;Cenpj;Arhgef2;Mta1;Radil;Mdm1;Ttll9;Katnal2;Shtn1;Cdk5rap2;Kifc2;Cdk5rap3;Nav1;Appbp2;Iqgap1;Dnm3;Sept9;Kif26b;
GO:0008270	981	72	24.5376	2.93428	3.77341e-14	4.25064e-12	molecular_function:zinc ion binding	Adamts10;Parp1;Trim29;Cryz;Glo1;Phrf1;Neil1;Zmiz1;Adamts18;Adamtsl2;Agbl4;Zmat4;Sh3rf1;Trim44;Rnpepl1;Rffl;Zfp638;Nrap;Adam33;Trhde;Baz1a;Grin2a;Mid1;Pcgf5;Agbl1;Nsd1;Rbm5;Mkrn1;Zfp385a;Rnf139;Mta1;Lmo2;Dpys;Adamts12;Vps8;Esrrb;Mta3;Man2a1;Rfwd2;Gli2;Dmd;Bmp1;Grin2b;March1;Pgr;Ubr5;Prkca;Rnf150;Lmx1b;Agbl2;Adam19;Cyhr1;Zdhhc8;Mgrn1;Phf8;Glra1;Esr2;Phf14;Bard1;Ablim2;Sh3rf3;P2rx5;Mnat1;Csrp1;Rarb;…
GO:0003674	7650	315	191.348	1.64621	4.23216e-14	4.67572e-12	molecular_function:molecular_function	Cachd1;n-TQttg5;Ttll11;4930467E23Rik;Gm6559;6330409D20Rik;B430306N03Rik;Ccdc71;Vwa3b;Fam117b;Xxylt1;Gm1043;Zfp362;1110046J04Rik;Metrn;Ttc7b;Mboat1;Sdk1;Kctd16;Ccser1;Mipol1;Opcml;Igf1os;Hmgxb3;1700102P08Rik;Elmod3;Iffo2;Ggt7;Muc6;Gm14393;Dnaaf3;Pard3b;Gm3404;Tmem56;4932438A13Rik;Defb36;4930533K18Rik;n-TMcat6;Fbxw27;CK137956;Apopt1;Lin54;E130311K13Rik;Ankrd31;4930546C10Rik;Slc10a7;Odf3l2;1700112E0…
GO:0045211	218	32	5.45279	5.86855	4.37502e-14	4.74236e-12	cellular_component:postsynaptic membrane	Grid2;Grin2a;Dlgap2;Sema4f;Gphn;Cacng8;Clstn1;Shank2;Ntrk2;Ank2;Bcr;Il1rapl1;Synpo;Dlg2;Arrb1;Sema4b;Grik4;Srcin1;Grik3;Kcnma1;Nbea;Syne1;Grik5;Kcnb1;Sipa1l1;Dmd;Disc1;Kctd16;Gabrg3;Park2;Glra1;Grin2b;
GO:0004674	409	42	10.2302	4.10548	3.9963e-13	4.25162e-11	molecular_function:protein serine/threonine kinase activity	Prkce;Dyrk4;Tnni3k;Prkca;Wnk1;Ikbke;Tesk1;Bcr;Dclk1;Camk2b;Akt1;Stk32a;Camk1d;Rps6ka4;Map4k3;Mylk;Pak4;Rps6kc1;Tesk2;Map3k5;Taok1;Camkk2;Syk;Mapk10;Ulk4;Dmpk;Cdc42bpb;Stk4;Tnik;Map2k5;Prkg1;Phkg2;Wnk2;Riok1;Map2k6;Nrbp2;Rps6ka5;Hunk;Prkd1;Mark4;Kalrn;Speg;
GO:0042391	96	21	2.40123	8.74552	1.24534e-12	1.30081e-10	biological_process:regulation of membrane potential	Grin2a;Asic2;Rims4;Abcb5;Rims3;Grik3;Kcnma1;Kcnq1;Cacna1g;Rangrf;Grik5;Ano1;Piezo2;Kcnh8;Dmd;Kcnh1;Gpr39;Cacna1i;Cacnb4;Glra1;Dpp6;
GO:0008289	251	32	6.27822	5.09699	1.33928e-12	1.37395e-10	molecular_function:lipid binding	Trip10;Esr2;Osbpl3;Paqr5;Mgll;Cyth3;Dennd1a;Zfyve26;Pacsin1;Pard3;Osbpl10;Atp5g1;Osbp2;Cadps;Vps36;Lipc;Sh3gl1;Osbpl11;Osbpl9;Alox15;Stard3;Alox8;Clvs1;Pitpna;Nsfl1c;Tiam1;Pitpnc1;Tec;Stard5;Tex2;Ptgs1;Pgr;
GO:0005216	167	26	4.17714	6.22435	2.94293e-12	2.96616e-10	molecular_function:ion channel activity	Scn5a;Grid2;Grin2a;Asic2;Scn10a;Kcng3;Scn8a;Kcnh8;Cacna1e;Kcnn2;Kcnh1;Ryr1;Cacna1c;Nalcn;Grik4;Grik3;Kcnma1;Kcnq1;Ryr3;Tpcn2;Grik5;Kcnb1;Itpr3;Cacna1d;Trpv4;Grin2b;
GO:0043197	128	23	3.20164	7.18382	3.87e-12	3.8333e-10	cellular_component:dendritic spine	Grid2;Grin2a;Asic2;Ppp1r9a;Dgki;Shank2;Ntrk2;Lama2;Kcnn2;Synpo;Baiap2;Arrb1;Ptpro;Rapgef4;Pde4b;Syt11;Syne1;Tiam1;Sipa1l1;Dnm3;Drd4;Grin2b;Pgr;
GO:0005516	173	26	4.32722	6.00848	5.97414e-12	5.72687e-10	molecular_function:calmodulin binding	Camkk2;Scn5a;Myo5a;Myo1d;Cfap221;Plcb3;Plcb1;Grm4;Kcnn2;Myh11;Kcnh1;Camk2b;Ryr1;Cacna1c;Camk1d;Kcnq1;Sntb1;Ryr3;Adcy1;Mylk;Phkg2;Cdk5rap2;Map6;Trpv4;Iqgap1;Rasgrf2;
GO:0005576	1640	94	41.021	2.29151	5.98107e-12	5.72687e-10	cellular_component:extracellular region	Fam19a5;Adamts10;Gkn1;Fuca2;Guca2a;Flrt1;Pi16;Ntn1;Scpep1;Oit1;Hmcn2;Nrg1;Metrn;Adamts12;Gpc5;Col12a1;Muc19;Lepr;Crispld2;Slit3;Reln;Tmprss11e;Gpc6;Wnt2b;Bmp5;Adamts14;Chsy1;Pdzd2;Vit;Col5a1;Spaca5;Muc6;Olfm1;Vwce;Clstn1;C1rb;Kirrel3;Egflam;Nxpe4;Sspo;Ncan;Igf1;Defb36;Mup20;Col25a1;Col8a1;Ush2a;Acpp;Pcsk5;Adamts18;Adamtsl2;Cd109;Spon2;Bglap3;Nell2;Igsf21;Col14a1;Lamb1;Lipc;Col27a1;C2;Spock1;60304…
GO:0008021	119	22	2.97653	7.39117	6.84184e-12	6.44367e-10	cellular_component:synaptic vesicle	Atp6v0d1;Myo5a;Grin2a;Pde4b;Dgki;Syt11;Ston2;Lamp1;Rab3c;Sv2b;Apba2;Disc1;Bin1;Syn2;Vti1a;Madd;Wdr7;Park2;Htr7;Grin2b;Entpd1;Slc2a8;
GO:0034765	133	23	3.3267	6.91375	7.71461e-12	7.14846e-10	biological_process:regulation of ion transmembrane transport	Scn5a;Asic2;Scn10a;Kcng3;Kcnip4;Kcnip1;Scn8a;Cacng8;Kcnh8;Cacna1e;Kcnh1;Cacna2d4;Kcnk13;Cacna1c;Kcnj6;Clic5;Nalcn;Kcnma1;Kcnq1;Tpcn2;Kcnb1;Cacna1d;Cacnb4;
GO:0043234	618	50	15.4579	3.23459	9.70099e-12	8.84638e-10	cellular_component:protein-containing complex	Sdc3;Plcb3;Dgki;CYTB;Parp1;Bcr;Ksr1;Akt1;Ssbp3;Utrn;Sipa1l1;Dcaf7;Park2;Alk;Pard3;Stk4;Lmo2;Pax2;Cacna1c;Runx2;Dmd;Iqgap1;Grb2;Atxn1;Serpinb6a;Prkca;Akap6;Nrxn2;Sash1;Nrxn1;Wipi2;Kdm1a;Magi2;Gnao1;Smad2;Atp6v0d1;Syk;Exoc4;Erc2;Arhgef2;Gab2;Ryr1;Rnf165;Eps8l1;Ruvbl1;Rapgef4;Kcnma1;Sntb1;Ctnnb1;Cdk5rap3;
GO:0005085	151	24	3.77693	6.35436	1.33212e-11	1.19578e-09	molecular_function:guanyl-nucleotide exchange factor activity	Dock5;Sergef;Ankrd27;Sos1;Dennd5b;Fgd4;Cyth3;Arhgef33;Dennd1a;Dock1;Arhgef2;Bcr;Dock9;Rasgef1b;Ralgps1;Sh2d3c;Rapgef4;Ric8b;Vav2;Rangrf;Tiam1;Kalrn;Madd;Rasgrf2;
GO:0030154	765	56	19.1348	2.9266	2.25974e-11	1.99726e-09	biological_process:cell differentiation	Lgr4;Taf4b;Ntrk2;Dclk1;Camk2b;Sema5b;Dmrt1;Boll;1700112E06Rik;Wipf3;Ntng1;Gas7;Tmem176b;Tec;Ecscr;Rgs19;Fgfr3;Abcb5;Pard3;Pax2;Bin1;Metrn;Gli2;Atraid;Prkd1;Speg;Sh3pxd2b;Bmp1;Grb2;Sema4f;Gna12;Slit3;Eya2;Cdhr2;Sim2;Dazap1;Bmp5;Sema4b;Spata16;Sbno2;Rfx6;Ror2;Ccdc63;Spata5;Srrm4;Bzw2;Paqr5;Robo2;Ptprq;Ctnnb1;Clgn;Ago2;Prdm16;Nav1;Piwil2;Efna5;
GO:0042802	641	50	16.0332	3.11853	3.19935e-11	2.78489e-09	molecular_function:identical protein binding	Trip10;Abat;Mcu;Atl1;Acpp;Parp1;Dcc;Kcnh1;Akt1;Nudt16;Baiap2;Topbp1;Park2;Alk;Mid1;Nell2;Stk4;Bin1;Daam1;Atg16l1;Diaph1;Prkd1;Col2a1;Ptprm;Grb2;Atxn1;Ralyl;Ephb2;Entpd1;Mapre3;App;Fhit;Itga2b;Igf1r;Tpcn2;Grik5;Kctd13;Safb2;Drd4;Cbs;Ugp2;Robo2;Hjurp;Sh3gl1;Trp73;Atl2;Stat3;Lcp1;Zhx2;Mvk;
GO:0005244	132	22	3.30169	6.66325	4.07794e-11	3.49668e-09	molecular_function:voltage-gated ion channel activity	Scn5a;Scn10a;Kcng3;Kcnip4;Kcnip1;Scn8a;Cacng8;Kcnh8;Cacna1e;Kcnh1;Cacna2d4;Kcnk13;Cacna1c;Kcnj6;Clic5;Nalcn;Kcnma1;Kcnq1;Tpcn2;Kcnb1;Cacna1d;Cacnb4;
GO:0019899	372	36	9.30477	3.86898	7.85035e-11	6.63239e-09	molecular_function:enzyme binding	Prkce;Scn5a;Prkca;Pold1;Cntnap2;Fdx1;Parp1;Akap6;Akirin2;Hyal2;Bcr;Lamp2;Hacd4;Akt1;Tep1;App;Ldb2;Kdm1a;Syne1;Mylk;Mst1r;Ctnnbl1;Park2;Cbs;Esr2;Por;Pawr;Plcb1;Ryr1;Cacna1c;Lamb1;Lamp1;Ctnnb1;Kalrn;Grb2;Pgr;
GO:0005622	748	54	18.7096	2.88622	7.98053e-11	6.64466e-09	cellular_component:intracellular	Scn5a;Gphn;Apopt1;Palm;Acpp;Trim29;Grm4;Tom1l2;Zfp74;Jmy;Wrn;Zmat4;Trim44;l7Rn6;Itpk1;Arl4d;Park2;Mid1;Vps13d;Sgsm1;Arrb1;Arl15;Slfn9;Arhgap27;Clvs1;Mrpl17;Ano4;Fam49a;Smc6;Serpinb6a;Ppp1r1a;Tbck;Gtpbp2;Tbc1d1;Ank2;Stk32a;Gm4862;Capn5;Fhit;Alox8;Gtpbp1;Map4k3;Pitpna;Zfp583;Smad2;Glra1;Evi5l;Exoc4;Arhgap21;Gab2;Il16;Hunk;Pitpnc1;Appbp2;
GO:0051015	124	21	3.10159	6.77072	8.56386e-11	7.02848e-09	molecular_function:actin filament binding	Shroom2;Wipf1;Shtn1;Myo18a;Fgd4;Ppp1r9a;Eef2;Myo1d;Syne1;Anxa8;Lcp1;Lima1;Wipf3;Sipa1l1;Ctnna3;Gas7;Trpv4;Pls1;Bin1;Eps8l1;Utrn;
GO:0007268	170	24	4.25218	5.64417	1.19048e-10	9.63285e-09	biological_process:chemical synaptic transmission	Myo5a;Grin2a;Exoc4;Plcb3;Cacna1g;Nrxn2;Gpr1;Clstn1;Grm4;Sv2b;Cacna1c;Cep89;Dlg2;Htr7;Slc6a11;Nrxn1;Kcnma1;Grik5;Ston2;Htr1f;Ctnnb1;Apba2;Glra1;Grin2b;
GO:0055085	344	34	8.60441	3.95146	1.53632e-10	1.22059e-08	biological_process:transmembrane transport	Scn5a;Slc9a9;Slc5a6;Kcng3;Tmco3;Scn8a;Kcnh8;Cacna1e;Sv2b;Kcnh1;Slc2a8;Kcnq1;Slc22a27;Tpcn2;Kcnb1;Cacna1d;Abcb9;Slc39a3;Abcb5;Scn10a;Slc25a12;Slc5a3;Ryr1;Cacna1c;Nalcn;Abcb10;Slc22a15;Kcnma1;Ryr3;Itpr3;Slc12a9;Trpv4;Sfxn5;Slc37a1;
GO:0016477	188	25	4.70241	5.31642	1.55096e-10	1.22059e-08	biological_process:cell migration	Shroom2;Col5a1;Sdc3;Myo18a;Reln;Fndc3b;Gpc6;Dock1;Cdc42bpb;Nrg1;Gab2;Plcg1;Erbb4;Fmnl3;Lamb1;Adamts12;Gfra1;Vav2;Nfatc2;Lcp1;Kctd13;Tiam1;Srgap1;Brat1;Specc1l;
GO:0045893	561	44	14.0322	3.13565	3.80294e-10	2.95242e-08	biological_process:positive regulation of transcription, DNA-templated	Lgr4;Sertad2;Ret;Hnf1b;Ebf3;Ssbp3;Nsd1;Bptf;Plcb1;Pax2;Lef1;Gli2;Runx2;Cdk5rap2;Smarca5;Glis1;Pgr;Lrp5;Hivep3;Nfatc3;Arhgef11;Erbb4;Prox1;Mapre3;Igf1r;Phf8;Nfatc2;Rfx6;Ror2;Pknox1;Tfdp1;Smad2;Npas2;Esr2;Mecom;Deaf1;Trp73;Stat3;Ctnnb1;Tox3;Igf1;Prdm16;Zfp516;Rora;
GO:0042803	771	53	19.2849	2.74827	5.84826e-10	4.47977e-08	molecular_function:protein homodimerization activity	Abat;Gphn;Ush2a;Acpp;Ntrk2;Ano2;Camk2b;Hnf1b;Nudt16;Dmrt1;Syt14;Wrn;Pah;Abcb9;Sumf1;Map3k5;Mid1;Ppp1r9a;Plcb1;Stk4;Rabep1;Abcb10;Acot7;Ext1;Mgll;Nudt5;Erbb4;Ptpro;Creb3l3;Kcnq1;Sgta;Xdh;Syne1;Sbf2;Myom3;Smad2;Cbs;Dgat2;Bard1;Atg7;Cdh13;Sppl3;Kcnma1;Prkg1;Ikzf3;Rbpms;Impa2;Syt11;Ano1;Zhx2;Col23a1;Tox3;Ptpre;
GO:0005813	425	37	10.6304	3.48057	6.5379e-10	4.94214e-08	cellular_component:centrosome	Ccdc187;Zfyve26;Kiz;Cep152;Cntrob;Sfi1;Cep89;Ttc28;Wrn;Ric8b;Akap9;Topbp1;Pde4b;Nup107;Traf3ip1;Haus8;Pde4d;Disc1;Fbxl7;Cct8;Atp6v0d1;Rap1gap2;Pcgf5;Tubgcp6;Ttll5;Cenpj;Tbc1d31;Ccdc141;Mdm1;Nme7;Rfwd2;Cdk5rap2;Pkhd1;Ctnnb1;Mark4;Cdk5rap3;Cep85;
GO:0006915	556	43	13.9071	3.09194	8.77517e-10	6.54719e-08	biological_process:apoptotic process	Bre;6330408A02Rik;Apopt1;Dcc;Steap3;Aktip;Akt1;Bbc3;Sh3rf1;Naip1;Krt20;Rffl;Map3k5;Ecscr;Ntn1;Fgfr3;Rbm5;Zfp385a;Stk4;Rabep1;Faf1;Prkd1;Brat1;Prkca;Dock1;Erbb4;Unc5c;App;Fhit;Sp110;Pak4;Ctnnbl1;Tnip2;Taok1;Pawr;Opa1;Unc5d;Cflar;Trp73;Rnf130;Map2k6;Tox3;Madd;
GO:0015031	578	44	14.4574	3.04342	8.90158e-10	6.55635e-08	biological_process:protein transport	Ankrd27;Stxbp5l;Spire2;Rab3c;Tom1l2;Aktip;Vps36;Synrg;l7Rn6;Abcb9;Xpo7;Myo5a;Ap3d1;Calcrl;Rabep1;Vti1a;Arrb1;Agap1;Atg16l1;Rangrf;Nup133;Tbc1d5;Bbs2;Ap4s1;Sil1;Nup93;Scamp2;Stam;Dennd1a;Vps45;Atg4c;Pex13;Nup107;Apba2;Fras1;Exoc4;Ranbp3;Sec63;Snx30;Atg7;Cadps;Spire1;Exoc6;Appbp2;
GO:0005913	314	31	7.85402	3.94702	9.68019e-10	7.03958e-08	cellular_component:cell-cell adherens junction	Snd1;Shroom2;Stxbp6;Rangap1;Plcb3;Trim29;Mprip;Baiap2;Rars;Ldha;Zc3hav1;Fam129b;Pak4;Cct8;Bzw2;Eef2;Mb21d2;Pard3;Pi4ka;Dock9;Eps8l1;Eif4g1;Sh3gl1;Ruvbl1;Tjp2;Shtn1;Lima1;Ctnnb1;Iqgap1;Ptprm;Sept9;
GO:0005578	296	30	7.40379	4.05198	1.01332e-09	7.27687e-08	cellular_component:extracellular matrix	Slit3;Col8a1;Reln;Adamts10;Gpc6;Thsd4;Wnt2b;Adamts18;Adamtsl2;Spon2;Fbln2;Vit;Ntn1;Col5a1;Hmcn2;Alpl;Lama2;Col14a1;Lamb1;Col27a1;Adamts12;Gpc5;Egflam;Col12a1;Spock1;Ncan;Col15a1;Col2a1;Bmp1;Crispld2;
GO:0006897	177	23	4.42727	5.19508	1.2156e-09	8.62173e-08	biological_process:endocytosis	Trip10;Lrp5;Mrc2;Lrp1b;Dennd1a;Pacsin1;Snx30;Atp9b;Lrp1;Rabep1;Bin1;Vldlr;Sh3gl1;Arrb1;App;Arhgap27;Wipf1;Synrg;Ston2;Wipf3;Atp9a;Rin2;Dnm3;
GO:0043195	104	18	2.60133	6.91953	1.3433e-09	9.41129e-08	cellular_component:terminal bouton	App;Grin2a;Grik3;Kcnma1;Ush2a;Pacsin1;Grik5;Erc2;Ap3d1;Ntrk2;Grm4;Ptprn2;Sv2b;Syn2;Vti1a;Drd4;Grin2b;Grik4;
GO:0009986	593	44	14.8326	2.96644	1.83101e-09	1.26737e-07	cellular_component:cell surface	Scn5a;Sdc3;Hyal2;Ntrk2;Kcnh1;Mst1r;Cd109;Slc6a3;Dpp6;Fgfr3;Grin2a;Bsn;Mrc2;Clmp;Vldlr;Lipc;Tjp2;Ptprt;Sulf2;Dmd;Trpv4;Grin2b;Cntnap2;Tnfrsf11a;Il1rapl1;Entpd1;App;Nrxn1;Capn5;Itga2b;Adgrv1;Hfe2;Defb43;Igsf3;Clstn1;Lrrc8a;Robo2;Kcnj6;Pecam1;Unc5d;Lamp1;Col23a1;Spn;Defb36;
GO:0043204	122	19	3.05156	6.22632	2.26902e-09	1.55185e-07	cellular_component:perikaryon	Pde9a;Esr2;Mapk10;Shtn1;Naip1;Grik3;Ctnnd2;Reln;Pcsk2;Bglap3;Grik5;Kcnb1;Nell2;Ntrk2;Cacna1e;Camk2b;Ptpn5;Grik4;Pgr;
GO:0006816	139	20	3.47678	5.75245	2.96086e-09	2.0012e-07	biological_process:calcium ion transport	Grin2a;Mcu;Cachd1;Cacng8;Cacna1e;Calcrl;Plcg1;Cacna2d4;Camk2b;Ryr1;Cacna1c;Nalcn;Ryr3;Tpcn2;Itpr3;Cacna1d;Trpv4;Cacna1i;Cacnb4;Grin2b;
GO:0098641	277	28	6.92855	4.04125	3.73517e-09	2.49518e-07	molecular_function:cadherin binding involved in cell-cell adhesion	Snd1;Stxbp6;Rangap1;Plcb3;Trim29;Mprip;Baiap2;Rars;Ldha;Zc3hav1;Fam129b;Pak4;Cct8;Bzw2;Eef2;Mb21d2;Pi4ka;Dock9;Eps8l1;Eif4g1;Sh3gl1;Ruvbl1;Tjp2;Shtn1;Lima1;Ctnnb1;Iqgap1;Sept9;
GO:0007420	142	20	3.55182	5.63092	4.10744e-09	2.71233e-07	biological_process:brain development	Ext1;Esr2;Shroom2;Ak7;Reln;Bptf;Plcb1;Bcr;Nrg1;Dclk1;Unc5c;Llgl1;Emx1;Igf1r;Nme7;Diaph1;Cdk5rap2;Ndufs4;Spata5;Efna5;
GO:0005887	1089	64	27.239	2.34958	4.84994e-09	3.16624e-07	cellular_component:integral component of plasma membrane	Tnfrsf13b;Ret;Ntrk2;Steap3;Grm4;Kcnh1;Lrp1;Flrt1;Cacna1d;Fgfr3;Abcb5;Nrg1;Tmem150c;Gpc5;Slc5a4b;Grik3;Trpv4;Lepr;Tspan9;Pag1;Tmprss11e;Gpc6;Ank2;Laptm5;Kcnq1;Tas1r3;Drd4;Kcnj6;Slc7a1;Slc22a19;Slc6a9;Col25a1;Lgr4;Htr7;Slc22a27;Slc6a3;Pcdh9;Slc38a6;Alk;Asic2;Gpr139;Kcnk13;Slc6a11;Itpr3;Htr1f;Slc5a6;Tnfrsf11a;Ephb2;Kcnh8;Plpp1;Slc2a8;Best3;Ror2;Slc14a1;Glra1;Gpr1;P2rx5;Slc5a3;Adgrl3;Syt11;Ank;Plpp3;…
GO:0015629	194	23	4.85249	4.73984	5.90295e-09	3.81039e-07	cellular_component:actin cytoskeleton	Fgd4;Ppp1r9a;Pawr;Ablim2;Mprip;Synpo;Ankrd23;Clic5;Baiap2;Srcin1;Csrp1;Mad1l1;Wipf1;Topbp1;Fam129b;Synpo2;Nfatc2;Lcp1;Lima1;Myl2;Iqgap1;Sept9;Specc1l;
GO:0044325	118	18	2.95151	6.09857	7.88461e-09	5.03301e-07	molecular_function:ion channel binding	Scn5a;Rims4;Rims3;Scn10a;Ppp1r9a;Kcnq1;Kcnip1;Pde4b;Diaph1;Rangrf;Akap6;Kcnb1;Ank2;Ctnnb1;Kcnh1;Pde4d;Cacna1c;Arrb1;
GO:0043235	134	19	3.35172	5.66874	8.96645e-09	5.66069e-07	cellular_component:receptor complex	Lrp5;Lrp1b;Ret;Ntrk2;Ptprn2;Erbb4;Lrp1;Vipr1;Vldlr;App;Lifr;Igf1r;Gfra1;Itln1;Tm7sf2;Adgrv1;Itpr3;Kctd16;Lepr;
GO:0030018	105	17	2.62635	6.47287	9.21786e-09	5.75616e-07	cellular_component:Z disc	Scn5a;Jph1;Pde4b;Ryr3;Synpo2;Scn8a;Ank2;Cacna1d;Kcnn2;Ctnnb1;Dmd;Ryr1;Cacna1c;Synpo;Bin1;Ppp1r12b;Grin2b;
GO:0004984	1113	3	27.8393	0.107761	9.64416e-09	5.9576e-07	molecular_function:olfactory receptor activity	Olfr97;Olfr970;Olfr655;
GO:0043231	741	49	18.5345	2.64372	9.8976e-09	6.01087e-07	cellular_component:intracellular membrane-bounded organelle	Trip10;Dyrk4;Rangap1;Col8a1;Ret;Palm;Cisd3;Casz1;Grhl1;Zmiz1;Tm7sf2;Rps6kc1;Zfp638;Ptgs1;Por;Uck2;Mta1;Rabep1;Snapc1;Mta3;Glb1;Ryr3;Atxn1;Scamp2;Gtpbp2;Cyp2b19;Sun1;App;Igf1r;Pex13;Rptor;Dnajc1;Slc14a1;Safb2;Cyp2d9;Cyp2b13;Glra1;Dgat2;Fdft1;Golga4;Atp11a;Mecom;Bard1;Wbp11;Ruvbl1;Sppl3;Trp73;Pmepa1;Ankrd6;
GO:0006974	411	34	10.2803	3.30731	9.93965e-09	6.01087e-07	biological_process:cellular response to DNA damage stimulus	Ubr5;Bre;Bccip;Ikbke;Zfyve26;Parp1;Ercc6;Ube2e2;Neil1;Eya2;Akt1;Jmy;Bbc3;Wrn;Topbp1;Nfatc2;Spidr;Babam1;Atrx;Taok1;Wdr48;Npas2;Macrod1;Zfp385a;Bard1;Ruvbl1;Fancd2;Mcm9;Rad51b;Herc2;Trp73;Rev1;Brat1;Smc6;
GO:0008150	7257	270	181.518	1.48746	1.13017e-08	6.76334e-07	biological_process:biological_process	Cachd1;n-TQttg5;4930467E23Rik;Gm6559;6330409D20Rik;Dnah17;B430306N03Rik;Ccdc71;Vwa3b;Fam117b;Xxylt1;Wdr93;Rpp14;Gm1043;Zfp362;1110046J04Rik;Mboat1;Ccser1;Ralyl;Mipol1;Cyhr1;Igf1os;Hmgxb3;1700102P08Rik;Elmod3;Iffo2;Ggt7;Muc6;Gm14393;Pard3b;Gm3404;Tmem56;4930533K18Rik;n-TMcat6;Fbxw27;CK137956;Lin54;Ankrd31;4930546C10Rik;Zfp74;Slc10a7;Odf3l2;Krt78;Stfa2l1;Pcdh9;Neurl4;Cep104;Gm10354;A630010A05Rik;Cm…
GO:0007626	108	17	2.70138	6.29307	1.33776e-08	7.9231e-07	biological_process:locomotory behavior	App;Abat;Grin2a;Pex13;Reln;Scn8a;Fign;Lmx1b;Zfp385a;Cacna1e;Nrg1;Apba2;Zdhhc8;Slc6a3;Gnao1;Park2;Gng7;
GO:0008152	439	35	10.9806	3.18743	1.44507e-08	8.47136e-07	biological_process:metabolic process	Gphn;Ftcd;Isoc1;Papss2;Hyal2;Fuca2;Neil1;Treh;Nt5c2;Wrn;Camk1d;Glb1l2;Pah;Manba;Agpat9;Idua;Ndst1;Mgea5;Uck2;Alpl;Fdft1;Spaca5;Ugp2;Ogdh;Gsto1;Acsm1;Lpcat1;Acox3;Man2a1;Glb1;Prkg1;Cdyl2;Hdhd3;Sulf2;Mvk;
GO:0006412	337	30	8.42932	3.55901	1.55286e-08	9.01131e-07	biological_process:translation	Mrps6;TrnD;TrnN;TrnR;Akt1;TrnI;Rars;Eefsec;TrnA;Sepsecs;TrnC;TrnY;TrnG;TrnS1;TrnS2;Eef2;TrnM;TrnH;Slc25a12;Eif4g1;TrnK;Slc25a21;Mrpl22;TrnQ;TrnT;Vars2;Mrpl17;TrnL2;TrnW;TrnE;
GO:0005262	85	15	2.12609	7.05521	2.43656e-08	1.3998e-06	molecular_function:calcium channel activity	Grin2a;Mcu;Dennd5b;Ryr3;Tpcn2;Itpr3;Cacng8;Cacna1e;Cacna1d;Cacna2d4;Trpv4;Ryr1;Cacna1c;Cacnb4;Grin2b;
GO:0007612	61	13	1.52578	8.52022	2.94711e-08	1.67635e-06	biological_process:learning	Shank2;Ntrk2;Grm4;Grin2a;Nrxn1;Cntnap2;Ctnnd2;Sorcs3;Reln;Park2;Grin2b;Ptgs1;Ephb2;
GO:0005929	237	24	5.92804	4.04856	4.44179e-08	2.48433e-06	cellular_component:cilium	Esr2;Elmod3;Ccdc40;Cfap221;Ttll5;Ttll11;Ift43;Ttll9;Dnah17;Dnaic1;Dnah12;Rapgef4;Sufu;Gli2;Dnah8;Traf3ip1;Rp1l1;Bbs2;Ift122;Trpv4;Cc2d2a;Drc1;Cct8;Pacrg;
GO:0003676	762	48	19.0598	2.51839	4.45406e-08	2.48433e-06	molecular_function:nucleic acid binding	Snd1;Pcbp3;Zbtb7c;Ybx3;Neil1;Zfp74;Rbms3;Celf4;Wrn;Zmat4;Boll;Zfat;Zfp638;Rbm5;Aebp2;Zfp385a;Gli2;Smarca5;Glis1;Ralyl;Srbd1;Hivep3;Pold1;Glis3;Dazap1;Pogz;Pop7;Zfp583;Tsen34;Synj2;Safb2;Raly;Rbfox1;R3hcc1;Zfp292;Zfp827;Gpatch2;Zfp618;Rbm34;Ikzf3;Rbpms;Dhx36;Ago2;Pdcd11;Prdm16;Zfp516;Piwil2;Zfp536;
GO:0032403	355	30	8.87955	3.37855	4.50135e-08	2.48656e-06	molecular_function:protein-containing complex binding	Vps28;CYTB;Ercc6;Hnf1b;Lrp1;Wrn;Rptor;Magi2;Sipa1l1;Slc6a3;Gnao1;Disc1;Park2;Atp6v0d1;Grin2a;Exoc4;Ppp1r9a;Mb21d2;Erc2;Bin1;Depdc5;Rapgef4;Rarb;Cflar;Kcnma1;Pcsk2;Cdk5rap2;Ctnnb1;Cdk5rap3;Iqgap1;
GO:0005764	320	28	8.0041	3.49821	6.32211e-08	3.4591e-06	cellular_component:lysosome	Trip10;Ankrd27;Acpp;Hyal2;Lamp2;Laptm5;Vps36;Bbc3;Zc3hav1;Kcnq1;Manba;Rptor;Tpcn2;Abcb9;Idua;Wdr48;Fgfr3;Myo5a;Lrba;Calcrl;Pebp4;Pax2;Tmem150c;Depdc5;Glb1;Syt11;Lamp1;March1;
GO:0003824	472	35	11.806	2.96458	7.50504e-08	4.06759e-06	molecular_function:catalytic activity	Abat;Gphn;Pgs1;Ftcd;Isoc1;Papss2;Hyal2;Ppm1l;Neil1;Treh;Nt5c2;Wrn;Camk1d;Ldha;Fhit;Pah;Xdh;Sepsecs;Marc2;Rcl1;Abhd6;Pptc7;Ndst1;Klhl3;Alpl;Fdft1;Oplah;Cdkal1;Acsm1;Syn2;Man2a1;Prkg1;Cdyl2;Sulf2;Sugct;
GO:0008017	190	21	4.75244	4.41879	7.78886e-08	4.18196e-06	molecular_function:microtubule binding	Mid1;Kif14;Fmn1;Ccdc187;Tubgcp6;Ftcd;Arhgef2;Opa1;Kif18b;Mdm1;Mapre3;Traf3ip1;Cdk5rap2;Kifc2;Tiam1;Map6;Trpv4;Mark4;Appbp2;Dnm3;Kif26b;
GO:0000122	711	45	17.7841	2.53035	1.02034e-07	5.42764e-06	biological_process:negative regulation of transcription by RNA polymerase II	Pcbp3;Ybx3;Trim29;Mxi1;Hnf1b;Mlip;Dmrt1;Sufu;Ctnnbip1;Park2;Fgfr3;Nsd1;Bptf;Aebp2;Pax2;Vldlr;Map2k5;Gps2;Lef1;Gli2;Trpv4;Glis1;Atxn1;Akirin2;Glis3;Prox1;Sim2;Hcfc2;Cux1;Kdm1a;Nfatc2;Traf3ip1;Hfe2;Esr2;Mapk10;Mxd1;Pawr;Phf14;Wwc2;Rarb;Trp73;Zhx2;Ctnnb1;Prdm16;Zfp536;
GO:0005604	97	15	2.42624	6.1824	1.14411e-07	6.03022e-06	cellular_component:basement membrane	Col5a1;Egflam;Hmcn2;Col8a1;Col4a6;Ush2a;Lama2;Gsto1;Col15a1;Spn;Col2a1;Lamb1;Fras1;Ntn1;Efna5;
GO:0007049	600	40	15.0077	2.6653	1.35073e-07	7.05451e-06	biological_process:cell cycle	Tacc1;Prkce;Bre;Bccip;Zfyve26;Lin54;Steap3;Foxn3;Sept10;Mad1l1;Haus8;Fbxl7;Mtus1;Pard3;Cables2;Zfp385a;Nedd9;Fancd2;Mark4;Brinp2;Specc1l;Cntrob;Lmln;Kif18b;Nsun2;Pogz;Ttc28;Mapre3;Pak4;Babam1;Tfdp1;Fign;Arhgef2;Mnat1;Prr5;Pard3b;Hjurp;Ruvbl1;Trp73;Sept9;
GO:0030165	114	16	2.85146	5.61116	1.4535e-07	7.52283e-06	molecular_function:PDZ domain binding	Grid2;Kif14;Exoc4;Sntb1;Grik5;Erc2;Sntg2;Cacna1d;Mpp2;Shisa9;Synj2;Kirrel3;Dlg2;Ushbp1;Park2;Baiap2;
GO:0005730	698	44	17.4589	2.5202	1.54455e-07	7.92272e-06	cellular_component:nucleolus	Med27;Bcas3;Taf4b;Parp1;Ercc6;Mxi1;Aktip;Lrp1;Nudt16;Midn;Wrn;Rcl1;Rpp14;Pcgf5;Rbbp9;Pax2;Fancd2;Snapc1;Larp4b;Itpr3;Tbl3;Smg6;Smarca5;Tacc2;Pum3;Grb2;Rae1;Nfatc3;Eya2;Nsun2;Sun1;Phf8;Sp110;Fam129b;Ston2;Slc14a1;Wbp11;Gtf3c1;Hjurp;Rbm34;Deaf1;Mina;Pdcd11;Cep85;
GO:0070588	87	14	2.17611	6.43348	1.93604e-07	9.84299e-06	biological_process:calcium ion transmembrane transport	Mcu;Cacna1g;Ryr3;Tpcn2;Itpr3;Cacng8;Cacna1e;Cacna1d;Cacna2d4;Trpv4;Ryr1;Cacna1c;Cacnb4;Nalcn;
GO:0055114	654	42	16.3584	2.56749	1.97467e-07	9.95131e-06	biological_process:oxidation-reduction process	Cyb5r3;Fdx1;CYTB;Cryz;ND2;Steap3;ND1;Pah;Tm7sf2;Ndufs4;Sumf1;Sh3pxd2a;Cyp20a1;Ptgs1;Por;ND3;Ogdh;Acox3;Sh3pxd2b;Coq6;Gfod1;COX2;Cyp2b19;ND6;Far2;Ldha;Alox8;Kdm1a;Xdh;COX1;Marc2;ND4;Rnls;Cyp2d9;ND4L;Fdft1;Gsto1;Bdh2;Alox15;ND5;Mina;Cyp27a1;
GO:0086010	28	9	0.700359	12.8506	2.09986e-07	1.04902e-05	biological_process:membrane depolarization during action potential	Cacna1c;Scn5a;Cacna1e;Tpcn2;Scn8a;Scn10a;Scn7a;Cacna1i;Nalcn;
GO:0003700	852	50	21.3109	2.34621	2.12238e-07	1.05113e-05	molecular_function:DNA-binding transcription factor activity	Tead3;Hoxa3;Myrfl;Taf4b;Grhl1;Foxn3;Hnf1b;Dmrt1;Rfx8;Pax7;Mta1;Pax2;Esrrb;Mta3;Lef1;Elmsan1;Gli2;Runx2;Pgr;Hivep3;Nfatc3;Lmx1b;Glis3;Prox1;Sim2;Pou6f2;Creb3l3;Kdm1a;Zfp808;Stat5b;Nfatc2;Zfp583;Rfx6;Tfdp1;Smad2;Npas2;Esr2;Sox5;Mecom;Deaf1;Zfp454;Rarb;Trp73;Stat3;Zhx2;Zfp948;Ctnnb1;Zfp516;Rfx4;Rora;
GO:0005765	168	19	4.20215	4.52149	2.27994e-07	1.1177e-05	cellular_component:lysosomal membrane	Atp6v0d1;Zfyve26;Acpp;Atp11a;Ap3d1;Lamp2;Lrp1;Laptm5;Slc2a8;Sppl3;Depdc5;Stard3;Rptor;Tpcn2;Atraid;Abcb9;Atp11c;Atp6v0a2;March1;
GO:0016311	103	15	2.57632	5.82226	2.29571e-07	1.1177e-05	biological_process:dephosphorylation	Ptprt;Dusp10;Ptprr;Ptprq;Ptprs;Ptpro;Alpl;Ssh2;Acpp;Dusp4;Ptprn2;Synj2;Ptprm;Ptpre;Ptpn5;
GO:0006629	452	33	11.3058	2.91886	2.38214e-07	1.15003e-05	biological_process:lipid metabolic process	Elovl5;Mgll;Cyb5r3;Pgs1;Plcb3;Fdx1;Osbpl10;Plcg1;Hacd4;Plpp1;Prkag2;Far2;Mbtps1;Alox8;Tm7sf2;Plb1;Agpat9;Ptgs1;Dgat2;Mogat1;Fdft1;Plcb1;St8sia1;Acsm1;Lpcat1;Naa40;Vldlr;Lipc;Acox3;Mboat1;Alox15;4932438A13Rik;Mvk;
GO:0005903	75	13	1.87596	6.92978	2.45439e-07	1.17504e-05	cellular_component:brush border	Rapgef4;Myo18a;Myo1d;Slc9a2;Diaph1;Itpr3;Lima1;Myh11;Eps8;Pls1;Cdhr2;Treh;Rgs19;
GO:0008284	453	33	11.3308	2.91241	2.49518e-07	1.18097e-05	biological_process:positive regulation of cell proliferation	Lrp5;Kif14;Hoxa3;Akirin2;Gkn1;Ntrk2;Erbb4;Prox1;Ssbp3;Nudt16;Agtr1a;Lifr;Stat5b;Ntn1;Fgfr3;Crlf1;Vwce;St8sia1;Calcrl;Gab2;Pax2;Mta3;Rarb;Rad51b;Wdr77;Lef1;Stat3;Gli2;Runx2;Pkhd1;Ctnnb1;Igf1;Pgr;
GO:0003723	728	45	18.2093	2.47126	2.5079e-07	1.18097e-05	molecular_function:RNA binding	Pcbp3;Ybx3;Cryz;Nudt16;Rbms3;Celf4;Zmat4;Boll;Sepsecs;Rcl1;Zfp638;Eef2;Rbm5;Zfp385a;Eif4g1;Larp4b;Nol9;Pum3;Atxn1;Ubr5;Ralyl;Srbd1;Rae1;Nudt5;Fastkd2;Nsun2;Dazap1;Tep1;Zc3hav1;Ctif;Synj2;Safb2;Raly;Rbfox1;Srrm4;Bard1;Snrpg;Rbm34;Cwc22;Rbpms;Sfswap;Dhx36;Ago2;Pdcd11;Piwil2;
GO:0005615	1353	69	33.8423	2.03887	2.61648e-07	1.22209e-05	cellular_component:extracellular space	Gkn1;Fuca2;Prkag2;Flrt1;Pi16;Tnfaip6;Nrg1;Metrn;Man2a1;Glb1;Gfra1;Col12a1;Sulf2;Sil1;Lepr;Serpinb6a;Sema4f;Slit3;Reln;Lamp2;Wnt2b;Bmp5;Entpd1;App;Manba;Hfe2;Alpl;Spaca5;Ssh2;Olfm1;Pcsk2;Zfp446;Lcp1;Col23a1;Igf1;Col25a1;Acpp;E130311K13Rik;Pcsk5;Ptprr;Cd109;Krt78;Nrg2;Spon2;Mtus1;Bglap3;Nell2;Col14a1;Lamb1;Vldlr;Lipc;Spock1;Col2a1;Bmp1;Ppp1r1a;Hc;Gm5771;Igf2;Sema4b;Xdh;Rnls;Kcp;Pecam1;Cdh13;Ltbp2;P…
GO:0005635	136	17	3.40174	4.99744	2.68976e-07	1.23621e-05	cellular_component:nuclear envelope	Rangap1;Rae1;Nav3;Parp1;Akap6;Mta1;Cyhr1;Bin1;Mlip;Sun1;Faf1;Syne1;Atraid;Itpr3;Clgn;Nup93;Ptgs1;
GO:0030036	136	17	3.40174	4.99744	2.68976e-07	1.23621e-05	biological_process:actin cytoskeleton organization	Trip10;Spire2;Ssh2;Ablim2;Cdc42bpb;Bcr;Fmnl3;Prr5;Arhgap26;Csrp1;Wipf1;Daam1;Spire1;Diaph1;Tesk2;Nrap;Specc1l;
GO:0046982	502	35	12.5564	2.78742	2.92422e-07	1.33331e-05	molecular_function:protein heterodimerization activity	Ext1;Taf4b;Itgad;Ano2;Kcnh1;Hnf1b;Ralgapb;Sim2;Dmrt1;Agtr1a;Syt14;Lifr;Micu2;Creb3l3;Sgta;Kcnb1;Pknox1;Smad2;Myo5a;Grin2a;Mid1;Sos1;Sox5;Kcnip1;Crlf1;Bard1;Bin1;Dlg2;Uba2;Cflar;Ikzf3;Ano1;Zhx2;Ctnnb1;Grin2b;
GO:0006470	137	17	3.42676	4.96096	2.95408e-07	1.33631e-05	biological_process:protein dephosphorylation	Ptprs;Ssh2;Ptprn2;Ppm1l;Eya2;Plpp1;Ptpn5;Dusp10;Ptprt;Ptprr;Ptprq;Ptpro;Dusp4;Pptc7;Ctdspl2;Ptprm;Ptpre;
GO:0021987	51	11	1.27565	8.62303	3.03371e-07	1.36161e-05	biological_process:cerebral cortex development	Tacc1;Ntrk2;Bbs2;Ptprs;Kif14;Emx1;Atg7;Reln;Tacc2;Ccdc85c;Plcb1;
GO:0016798	77	13	1.92599	6.74979	3.20942e-07	1.42931e-05	molecular_function:hydrolase activity, acting on glycosyl bonds	Mgea5;Man2a1;Glb1l2;Glb1;Manba;Spaca5;Macrod1;Fuca2;Hyal2;Neil1;Maneal;Idua;Treh;
GO:0001764	122	16	3.05156	5.24322	3.32751e-07	1.47051e-05	biological_process:neuron migration	Esr2;Fat3;Pex13;Adgrl3;Reln;Prkg1;Dcc;Spock1;Lmx1b;Ntrk2;Ctnnb1;Dclk1;Disc1;Kirrel3;Nav1;Ntn1;
GO:0019904	289	25	7.2287	3.45844	3.7366e-07	1.63869e-05	molecular_function:protein domain specific binding	Tacc1;Scn5a;Shroom2;Dlgap2;Cntrob;Phrf1;Lamp2;Srcin1;Kctd13;Tfdp1;Syk;Ppp1r9a;Myo1d;Cenpj;Gab2;Cacna1c;Tjp2;Faf1;Runx2;Mrpl17;Lamp1;Spn;Tacc2;Iqgap1;Grb2;
GO:0051301	354	28	8.85454	3.16222	4.23672e-07	1.84394e-05	biological_process:cell division	Tacc1;Prkce;Kif14;Bre;Zfyve26;Cntrob;Lmln;Kif18b;Nsun2;Sept10;Pogz;Ttc28;Mapre3;Mad1l1;Babam1;Haus8;Fbxl7;Cables2;Pard3;Fign;Cenpj;Arhgef2;Nedd9;Pard3b;Ruvbl1;Mark4;Sept9;Specc1l;
GO:0042383	109	15	2.7264	5.50177	4.40823e-07	1.90416e-05	cellular_component:sarcolemma	Pde9a;Scn5a;Kcnq1;Plcb3;Ryr3;Akap6;Lamp1;Ank2;Lama2;Cacna1d;Kcnn2;Dmd;Ryr1;Cacna1c;Utrn;
GO:0005245	42	10	1.05054	9.51893	4.7551e-07	2.03866e-05	molecular_function:voltage-gated calcium channel activity	Cacng8;Cacna1e;Cacna1d;Il1rapl1;Cacna2d4;Ryr1;Cacna1c;Cacna1g;Tpcn2;Cacnb4;
GO:0008137	32	9	0.80041	11.2442	5.41182e-07	2.30303e-05	molecular_function:NADH dehydrogenase (ubiquinone) activity	ND2;ND5;ND4;ND3;Wdr93;ND6;Ndufs4;ND1;ND4L;
GO:0007266	44	10	1.10056	9.08625	6.87829e-07	2.90557e-05	biological_process:Rho protein signal transduction	Cdh13;Arhgef11;Agtr1a;Srgap1;Gna12;Kalrn;Eps8l1;Pecam1;Baiap2;Synj2bp;
GO:0016491	588	38	14.7075	2.58371	6.94973e-07	2.91432e-05	molecular_function:oxidoreductase activity	Cyb5r3;CYTB;Cryz;ND2;Steap3;ND1;Pah;Tm7sf2;Sumf1;Cyp20a1;Ptgs1;Por;ND3;Ogdh;Acox3;Coq6;Gfod1;COX2;Cyp2b19;ND6;Far2;Ldha;Alox8;Kdm1a;Xdh;COX1;Marc2;ND4;Rnls;Cyp2d9;ND4L;Fdft1;Gsto1;Bdh2;Alox15;ND5;Mina;Cyp27a1;
GO:0031410	590	38	14.7576	2.57495	7.31741e-07	3.04627e-05	cellular_component:cytoplasmic vesicle	Ankrd27;Spire2;Hyal2;Grm4;Sv2b;Flrt1;Park2;Fgfr3;Myo1d;Pacsin1;Rabep1;Arrb1;Wipf1;Clvs1;Tbc1d5;Trpv4;March1;Dennd1a;Arap1;Ptprn2;Zdhhc8;Slc2a8;Agtr1a;App;Stoml1;Kcnq1;Rph3al;Spata16;Syk;Rab31;Arhgap21;Arhgef2;Cadps;Spire1;Pcsk2;Syt11;Lamp1;Fndc3a;
GO:0070469	57	11	1.42573	7.71535	7.99245e-07	3.30336e-05	cellular_component:respiratory chain	ND2;ND5;ND4;Ndufs4;ND1;ND4L;ND3;CYTB;ND6;COX1;COX2;
GO:0017124	115	15	2.87647	5.21472	8.13647e-07	3.33886e-05	molecular_function:SH3 domain binding	Prkce;Arhgap27;Fmn1;Sos1;Dennd1a;Grik5;Sh3bgrl2;Dock1;Shank2;Wipf3;Adam19;Sh3bp2;Synj2;Grb2;Drd4;
GO:0016791	116	15	2.90149	5.16976	8.9794e-07	3.65863e-05	molecular_function:phosphatase activity	Ptprt;Dusp10;Ptprr;Ptprq;Ptprs;Ptpro;Alpl;Ssh2;Acpp;Dusp4;Ptprn2;Ctdspl2;Ptprm;Ptpre;Ptpn5;
GO:0006939	16	7	0.400205	17.491	9.08159e-07	3.67421e-05	biological_process:smooth muscle contraction	Tpcn2;Cacna1c;Mylk;Htr7;Pde4b;Pde4d;Myh11;
GO:0004713	117	15	2.9265	5.12558	9.9e-07	3.97731e-05	molecular_function:protein tyrosine kinase activity	Fgfr3;Syk;Tie1;Igf1r;Map2k5;Ret;Tesk1;Map2k6;Ephb2;Mst1r;Ntrk2;Tec;Erbb4;Tesk2;Alk;
GO:0005925	352	27	8.80451	3.06661	1.15651e-06	4.58674e-05	cellular_component:focal adhesion	Ppfia1;Gna12;Mprip;Lmln;Lrp1;Srcin1;Capn5;Itga2b;Focad;Synpo2;Pak4;Flrt1;Atp6v0a2;Mrc2;Pi4ka;Arhgef2;Cdh13;Parvb;Csrp1;Rfwd2;Sntb1;Lcp1;Lima1;Ctnnb1;Trpv4;Iqgap1;Tspan9;
GO:0006281	309	25	7.72896	3.23459	1.15766e-06	4.58674e-05	biological_process:DNA repair	Ubr5;Bre;Bccip;Zfyve26;Parp1;Ercc6;Neil1;Eya2;Jmy;Wrn;Topbp1;Eepd1;Spidr;Babam1;Atrx;Taok1;Bard1;Mnat1;Ruvbl1;Fancd2;Mcm9;Rad51b;Herc2;Rev1;Smc6;
GO:0008203	88	13	2.20113	5.90606	1.23992e-06	4.87901e-05	biological_process:cholesterol metabolic process	Lrp5;App;Mbtps1;Cyb5r3;Fdft1;Tm7sf2;Fdx1;Mvk;Lrp1;Cyp27a1;Vldlr;Lepr;Lipc;
GO:0007608	1139	6	28.4896	0.210603	1.30019e-06	5.08136e-05	biological_process:sensory perception of smell	Olfr97;Igf1;Slc6a3;Olfr970;Olfr655;Pde4a;
GO:0000187	74	12	1.85095	6.48316	1.31708e-06	5.11259e-05	biological_process:activation of MAPK activity	Syk;Map2k5;Shc2;Trp73;Map2k6;Grm4;Map3k5;Igf1;Madd;Drd4;Arrb1;Alk;
GO:0005802	155	17	3.87699	4.38485	1.40668e-06	5.42373e-05	cellular_component:trans-Golgi network	Trip10;Myo18a;Bsn;Rab31;Atxn2;Pacsin1;Lrba;Arap1;Atp9b;Ap3d1;Clvs1;Nbea;Ap4s1;Gbf1;Prkd1;Atp9a;Rbfox1;
GO:0004721	138	16	3.45177	4.63531	1.46539e-06	5.61245e-05	molecular_function:phosphoprotein phosphatase activity	Ptprs;Ssh2;Ptprn2;Ppm1l;Eya2;Ptpn5;Dusp10;Ptprt;Ptprr;Ptprq;Ptpro;Dusp4;Pptc7;Ctdspl2;Ptprm;Ptpre;
GO:0036064	105	14	2.62635	5.3306	1.4767e-06	5.61831e-05	cellular_component:ciliary basal body	Agbl4;Daam1;Nme7;Akap9;Ush2a;Traf3ip1;Cenpj;Agbl2;Bbs2;Ift122;Pkhd1;Mark4;Disc1;Akt1;
GO:0007613	76	12	1.90097	6.31255	1.69065e-06	6.38998e-05	biological_process:memory	Grin2a;Sorcs3;Plcb1;Lmx1b;Itpr3;Shank2;Igf2;Kalrn;Igf1;Htr7;Grin2b;Ptgs1;
GO:0030900	77	12	1.92599	6.23057	1.91034e-06	7.17315e-05	biological_process:forebrain development	Fgfr3;App;Trp73;Reln;Prkg1;Setd2;Mecom;Atrx;Ctnnb1;Dclk1;Ndst1;Rfx4;
GO:0022008	64	11	1.60082	6.87148	2.18124e-06	8.0549e-05	biological_process:neurogenesis	Tacc1;Llgl1;Grin2a;Rarb;Cdk5rap2;Spock1;Cntn6;Nup133;Nrg1;Tacc2;Prdm16;
GO:0098609	179	18	4.47729	4.02029	2.18224e-06	8.0549e-05	biological_process:cell-cell adhesion	Snd1;Stxbp6;Bzw2;Plcb3;Mb21d2;Pi4ka;Mprip;Dock9;Eif4g1;Sh3gl1;Rars;Ldha;Zc3hav1;Unc5d;Adgrl3;Fam129b;Lima1;Pak4;
GO:0043066	480	32	12.0062	2.6653	2.18723e-06	8.0549e-05	biological_process:negative regulation of apoptotic process	Prkce;Kif14;Myo18a;Ybx3;Glo1;Kcnh8;Erbb4;Hnf1b;Akt1;Camk1d;Sh3rf1;Igf1r;Naip1;Fam129b;Stat5b;Cbs;Por;Asic2;Bard1;Pax2;Atg7;Mnat1;Rarb;Cflar;Chst11;Lef1;Stat3;Gli2;Pkhd1;Pde3a;Igf1;Pgr;
GO:0002244	94	13	2.35121	5.52908	2.4004e-06	8.72804e-05	biological_process:hematopoietic progenitor cell differentiation	Tnfrsf13b;Prrc2c;Ptprq;Zfat;6330408A02Rik;Eef2;Ston2;Dock1;Hyal2;Kcp;Muc19;Ssbp3;Wdr7;
GO:0004725	94	13	2.35121	5.52908	2.4004e-06	8.72804e-05	molecular_function:protein tyrosine phosphatase activity	Ptprt;Dusp10;Ptprr;Ptprq;Ptprs;Ptpro;Ssh2;Dusp4;Ptprn2;Eya2;Ptprm;Ptpre;Ptpn5;
GO:0005667	262	22	6.55336	3.35706	2.79911e-06	0.000101138	cellular_component:transcription factor complex	Tead3;Med27;Taf4b;Parp1;Hnf1b;Ldb2;Kdm1a;Nfatc2;Pknox1;Tfdp1;Smad2;Npas2;Pax7;Lmo2;Pax2;Deaf1;Trp73;Lef1;Elmsan1;Runx2;Ctnnb1;Mina;
GO:0007264	222	20	5.55284	3.60176	2.92001e-06	0.000104847	biological_process:small GTPase mediated signal transduction	Dock5;Mras;Gna12;Sos1;Rab31;Rhobtb1;Dock1;Rab3c;Dock9;Rasgef1b;Ralgps1;Arl15;Rasd1;Sh2d3c;Agap1;Rapgef4;Vav2;Arl4d;Tiam1;Rasgrf2;
GO:0004714	53	10	1.32568	7.5433	3.00445e-06	0.000107208	molecular_function:transmembrane receptor protein tyrosine kinase activity	Mst1r;Fgfr3;Ntrk2;Ror2;Tie1;Igf1r;Erbb4;Ret;Alk;Ephb2;
GO:0001662	41	9	1.02553	8.77599	3.17133e-06	0.000112465	biological_process:behavioral fear response	Esr2;Cacna1e;Deaf1;Spire1;Kalrn;Eif4g1;Drd4;Grin2b;Gng7;
GO:0042734	54	10	1.35069	7.40361	3.48226e-06	0.000122734	cellular_component:presynaptic membrane	Grm4;Grin2a;Nrxn1;Kcnh1;Kctd16;Grik5;Nrxn2;Erc2;Grin2b;Grik4;
GO:0010976	131	15	3.27668	4.57781	3.5326e-06	0.000123749	biological_process:positive regulation of neuron projection development	Ppp1r9a;Reln;Ret;Dcc;Ntrk2;Camk2b;Ptpn5;Htr7;Camk1d;Cflar;Kdm1a;Magi2;Tiam1;Prkd1;Disc1;
GO:0005089	68	11	1.70087	6.46727	3.67804e-06	0.000128063	molecular_function:Rho guanyl-nucleotide exchange factor activity	Sos1;Fgd4;Vav2;Arhgef33;Arhgef2;Bcr;Tiam1;Dock9;Kalrn;Eps8l1;Rasgrf2;
GO:0007169	99	13	2.47627	5.24983	4.01788e-06	0.000139053	biological_process:transmembrane receptor protein tyrosine kinase signaling pathway	Ptprt;Syk;Igf1r;Gfra1;Shc2;Pag1;Ret;Ephb2;Ntrk2;Ror2;Tec;Erbb4;Alk;
GO:0003682	448	30	11.2057	2.6772	4.06826e-06	0.000139953	molecular_function:chromatin binding	Pold1;Bcas3;Parp1;Nfatc3;Ercc6;Dmrt1;Wrn;Phf8;Cux1;Kdm1a;Stat5b;Nfatc2;Atrx;Smad2;Nsd1;Mkrn1;Mta1;Lmo2;Auts2;Mta3;Trp73;Lef1;Gli2;Runx2;Phf21b;Ctnnb1;Bahcc1;Tox3;Rfx4;Atxn1;
GO:0005743	379	27	9.47986	2.84815	4.17133e-06	0.000142133	cellular_component:mitochondrial inner membrane	Coq6;Mcu;Cyb5r3;CYTB;COX2;ND2;ND1;Atp5g1;Micu2;Usmg5;COX1;Marc2;Ndufs4;ATP6;Letm1;Slc25a12;Opa1;Abcb10;Slc25a21;Herc2;COX3;Stat3;Mrpl17;ND5;Sfxn5;Nipsnap1;Cyp27a1;
GO:0006366	133	15	3.3267	4.50897	4.1811e-06	0.000142133	biological_process:transcription by RNA polymerase II	Hivep3;Taf4b;Phrf1;Glis3;Mnat1;Pou6f2;Arrb1;Med13l;Deaf1;Gtf2a1l;Lef1;Stat3;Stat5b;Zfp516;Zfp536;
GO:0007411	134	15	3.35172	4.47532	4.54356e-06	0.000153545	biological_process:axon guidance	Ext1;Sema4f;Slit3;Reln;Dcc;Ephb2;Lama2;Robo2;Unc5c;Unc5d;Ptpro;Gli2;Ntn1;Kif26b;Efna5;
GO:0044212	230	20	5.75295	3.47648	4.76732e-06	0.000160165	molecular_function:transcription regulatory region DNA binding	Hivep3;Sox5;Grhl1;Pax2;Erbb4;Hnf1b;Prox1;Arrb1;Trp73;Kdm1a;Lef1;Stat3;Elmsan1;Gli2;Nfatc2;Runx2;Cdk5rap2;Rfx6;Ctnnb1;Dhx36;
GO:0007507	231	20	5.77796	3.46143	5.06057e-06	0.000167761	biological_process:heart development	Nfatc3;Adam19;Calcrl;Nrg1;Pcsk5;Dnaaf3;Erbb4;Cacna1c;Agtr1a;Dnaic1;Map2k5;Mospd3;Gli2;Ctnnb1;Myl2;Cc2d2a;Sh3pxd2b;Smad2;Ndst1;Drc1;
GO:0001964	22	7	0.550282	12.7208	5.08103e-06	0.000167761	biological_process:startle response	Csmd1;Grin2a;Nrg1;Park2;Kcnh1;Glra1;Grin2b;
GO:0005891	22	7	0.550282	12.7208	5.08103e-06	0.000167761	cellular_component:voltage-gated calcium channel complex	Cacna1c;Pde4b;Cacna1e;Cacna1d;Cacna2d4;Cacnb4;Pde4d;
GO:0030175	57	10	1.42573	7.01395	5.3323e-06	0.000175052	cellular_component:filopodium	Srcin1;Dmd;Shtn1;Fgd4;Trpv4;Ppp1r9a;Palm;Acpp;Lcp1;Utrn;
GO:0005975	193	18	4.82747	3.72866	5.72984e-06	0.000187034	biological_process:carbohydrate metabolic process	Sec1;Ppp1r1a;Glo1;Hyal2;Fuca2;Igf2;Akt1;Pgm1;Gck;Ldha;Man2a1;Glb1l2;Glb1;Chst11;Manba;Phkg2;4930568D16Rik;Idua;
GO:0031225	137	15	3.42676	4.37732	5.8049e-06	0.000188413	cellular_component:anchored component of membrane	Alpl;Gpc6;Hyal2;Treh;Cdh13;Gpc5;Mdga2;Gfra1;Itln1;Lsamp;Cntn6;Cd109;Hfe2;Ntng1;Efna5;
GO:0071805	87	12	2.17611	5.51441	5.93215e-06	0.000188726	biological_process:potassium ion transmembrane transport	Slc9a9;Kcng3;Kcnma1;Kcnip4;Kcnq1;Kcnip1;Slc9a2;Kcnb1;Kcnh8;Kcnh1;Kcnk13;Nalcn;
GO:0006887	103	13	2.57632	5.04596	5.94092e-06	0.000188726	biological_process:exocytosis	Srcin1;Llgl1;Myo5a;Rims4;Stxbp6;Rapgef4;Rims3;Stxbp5l;Exoc4;Rph3al;Kcnb1;Exoc6;Cadps;
GO:0002027	33	8	0.825423	9.692	5.94595e-06	0.000188726	biological_process:regulation of heart rate	Scn5a;Ank2;Cacna1e;Tnni3k;Dmd;Scn10a;Pde4d;Cacna1g;
GO:0019228	33	8	0.825423	9.692	5.94595e-06	0.000188726	biological_process:neuronal action potential	Scn5a;P2rx5;Scn10a;Kcnma1;Scn8a;Cacna1i;Scn7a;Dpp6;
GO:0051216	72	11	1.80092	6.10798	6.0049e-06	0.00018955	biological_process:cartilage development	Fgfr3;Hoxa3;Pax7;Chst11;Sox5;Sulf2;Bbs2;Chsy1;Col2a1;Bmp1;Bmp5;
GO:0042593	120	14	3.00154	4.66427	6.05467e-06	0.000190077	biological_process:glucose homeostasis	Gck;Mcu;Stxbp5l;Stat3;Rph3al;Kcnb1;Rfx6;Cacna1e;Trpv4;Akt1;Cacna1c;Csmd1;Lepr;Gpr39;
GO:0050885	58	10	1.45074	6.89302	6.11386e-06	0.000190892	biological_process:neuromuscular process controlling balance	App;Bcr;Ptprq;Myo5a;Nrxn1;Kcnma1;Camk2b;Camta1;Clic5;Rbfox1;
GO:0003351	14	6	0.350179	17.1341	6.15941e-06	0.000191275	biological_process:epithelial cilium movement	Dnah1;Ccdc40;Nme7;Ulk4;Ak7;Dnaic1;
GO:0070509	23	7	0.575295	12.1677	6.48644e-06	0.000200347	biological_process:calcium ion import	Cacna1c;Cacna1g;Cacna1e;Gck;Cacna1d;Cacna1i;Trpv4;
GO:0051017	34	8	0.850436	9.40694	7.18648e-06	0.000220233	biological_process:actin filament bundle assembly	Lima1;Shroom2;Gas7;Eps8;Pls1;Baiap2;Lcp1;Pawr;
GO:0060291	46	9	1.15059	7.82208	7.20692e-06	0.000220233	biological_process:long-term synaptic potentiation	Shank2;Ntrk2;Grin2a;Camk2b;Reln;Rasgrf2;Htr7;Grin2b;Itpr3;
GO:0001934	179	17	4.47729	3.79694	8.24181e-06	0.000250525	biological_process:positive regulation of protein phosphorylation	Prkca;Akap6;Stk4;Mprip;Aktip;Igf2;Akt1;Prr5;Ptpn5;Arrb1;Tnik;Wdfy2;Itln1;Map2k6;Brat1;Map3k5;Spn;
GO:0008022	200	18	5.00256	3.59816	8.98378e-06	0.000271641	molecular_function:protein C-terminus binding	Prrc2c;Tnni3k;Ppp1r9a;Atxn2;Fign;Sash1;Synj2bp;Shank2;Ercc6;Ksr1;Neil1;Dlg2;Vps36;Tjp2;Ctnnb1;Ago2;Rbfox1;Atxn1;
GO:0008134	330	24	8.25423	2.9076	9.95928e-06	0.000299561	molecular_function:transcription factor binding	Bcas3;Parp1;Nfatc3;Sufu;Kdm1a;Nfatc2;Tfdp1;Smad2;Bptf;Stk4;Meis2;Pax2;Atg7;Uba2;Arrb1;Esrrb;Trp73;Lef1;Stat3;Elmsan1;Runx2;Ctnnb1;Pdcd11;Rora;
GO:0000287	182	17	4.55233	3.73435	1.00664e-05	0.000301205	molecular_function:magnesium ion binding	Wnk1;Atp11a;Atp9b;Stk4;Nudt5;Eya2;Nudt16;Wrn;Gck;Pgm1;Impa2;Rps6ka4;Itpk1;Rps6ka5;Map3k5;Atp9a;Atp11c;
GO:0017048	36	8	0.900461	8.88434	1.03306e-05	0.000307509	molecular_function:Rho GTPase binding	Arhgef2;Cdc42bpb;Srgap1;Daam1;Fmnl3;Dock9;Diaph1;Iqgap1;
GO:0043065	310	23	7.75397	2.96622	1.11671e-05	0.000330695	biological_process:positive regulation of apoptotic process	Steap3;Erbb4;Akt1;Unc5c;Jmy;Bbc3;Camk1d;Sp110;Ctnnbl1;Map3k5;Esr2;Grin2a;Rbm5;Pawr;Bard1;Stk4;Atg7;Bin1;Rarb;Kcnma1;Trp73;Map2k6;Ctnnb1;
GO:0001701	288	22	7.20369	3.05399	1.12309e-05	0.000330879	biological_process:in utero embryonic development	Gna12;Tie1;Ybx3;Hc;Plcg1;Zmiz1;Kdm1a;Sec24d;Apba2;Smad2;Slc39a3;Sox5;Lrp1b;Mecom;Esrrb;Emx1;Man2a1;Rad51b;Gli2;Ctnnb1;Speg;Grin2b;
GO:0045600	49	9	1.22563	7.34317	1.1297e-05	0.000331129	biological_process:positive regulation of fat cell differentiation	Lrp5;Stk4;Wdfy2;Akt1;Igf1;Sh3pxd2b;Fndc3b;Zbtb7c;Zfp385a;
GO:0043154	63	10	1.57581	6.34596	1.16882e-05	0.000340856	biological_process:negative regulation of cysteine-type endopeptidase activity involved in apoptotic process	Por;Sh3rf1;Map2k5;Cflar;Naip1;Pax2;Akt1;Igf1;Lef1;Arrb1;
GO:0000226	78	11	1.951	5.63814	1.18737e-05	0.000344516	biological_process:microtubule cytoskeleton organization	Tacc1;Ulk4;Tubgcp6;Pard3;Map7d1;Cdk5rap2;Ttl;Map6;Mark4;Disc1;Tacc2;
GO:0005547	37	8	0.925474	8.64422	1.22934e-05	0.000354901	molecular_function:phosphatidylinositol-3,4,5-trisphosphate binding	Gbf1;Gab2;Akt1;Cyth3;Iqgap1;Pard3;Arap1;Anxa8;
GO:0006869	95	12	2.37622	5.05004	1.32769e-05	0.00038138	biological_process:lipid transport	Osbpl11;Osbpl9;Osbpl3;Stard3;Osbpl10;Atp11a;Pitpnc1;Ano4;Osbp2;Stard5;Atp11c;Vldlr;
GO:0008233	502	31	12.5564	2.46885	1.44056e-05	0.000411742	molecular_function:peptidase activity	Reln;Adamts10;Tmprss11e;Atg4c;Agbl2;Adam19;Pcsk5;Lmln;Thsd4;Adamts18;Adamts14;Adamtsl2;Agbl4;Capn5;Mbtps1;Nln;Adam33;Trhde;Metap1d;Scpep1;Agbl1;Tpp2;Gzmk;C1rb;Adamts12;Sppl3;C2;Pcsk2;Dpp8;Senp8;Bmp1;
GO:0005543	80	11	2.00102	5.49718	1.4712e-05	0.000418417	molecular_function:phospholipid binding	Arhgap44;Syt14;Agap1;Pacsin1;Pitpna;Nsfl1c;Tiam1;Psd2;Wdfy4;Arhgap26;Nbeal2;
GO:0003774	65	10	1.62583	6.15069	1.49148e-05	0.000422097	molecular_function:motor activity	Dnah17;Myo5a;Dnaic1;Dnah12;Myo18a;Myo1d;Dnah8;Myo16;Myh11;Kif18b;
GO:0005234	17	6	0.425218	14.1104	1.50589e-05	0.000424086	molecular_function:extracellularly glutamate-gated ion channel activity	Grid2;Grin2a;Grik5;Grik3;Grin2b;Grik4;
GO:0015630	151	15	3.77693	3.97147	1.67985e-05	0.000470766	cellular_component:microtubule cytoskeleton	Tacc1;Eml4;Mid1;Fmn1;Map7d1;Akt1;Ift43;Mapre3;Shtn1;Traf3ip1;Mark4;Tacc2;Nav1;Iqgap1;Specc1l;
GO:0030335	191	17	4.77745	3.55839	1.78965e-05	0.000498107	biological_process:positive regulation of cell migration	Sema4f;Prkca;Ret;Erbb4;Sema5b;Prr5;Lamb1;Sema4b;Cdh13;Igf1r;Lef1;Diaph1;Mylk;Ror2;Tiam1;Igf1;Tnfaip6;
GO:0005525	343	24	8.57939	2.7974	1.79474e-05	0.000498107	molecular_function:GTP binding	Gna12;Atl1;Gtpbp2;Rab3c;Sept10;Nudt16;Eefsec;Gtpbp1;Arl4d;Gnao1;Mras;Eef2;Rab31;Rhobtb1;Hhat;P2rx5;Opa1;Acsm1;Arl15;Rasd1;Agap1;Atl2;Dnm3;Sept9;
GO:0004970	18	6	0.450231	13.3265	1.96603e-05	0.000543022	molecular_function:ionotropic glutamate receptor activity	Grid2;Grin2a;Grik5;Grik3;Grin2b;Grik4;
GO:0007416	40	8	1.00051	7.9959	2.01596e-05	0.000553736	biological_process:synapse assembly	Shank2;Nrg1;Nrxn1;Bsn;Adgrl3;Kirrel3;Sdk2;Nrxn2;
GO:0005911	193	17	4.82747	3.52151	2.0241e-05	0.000553736	cellular_component:cell-cell junction	Shroom2;Pard3;Plcg1;Akt1;Tjp2;App;Adgrl3;Mylk;Flrt1;Tiam1;Ctnnb1;Prkd1;Tec;Iqgap1;Ptprm;Pdzd2;Grb2;
GO:0008013	84	11	2.10108	5.23541	2.21922e-05	0.000604238	molecular_function:beta-catenin binding	Ptprt;Shroom2;Ctnnd2;Sufu;Lef1;Ctnnbip1;Ctnna3;Park2;Rora;Grin2b;Rgs19;
GO:0005272	29	7	0.725372	9.65022	2.33822e-05	0.000633635	molecular_function:sodium channel activity	Scn5a;Asic2;Slc4a11;Scn8a;Scn10a;Scn7a;Nalcn;
GO:0051965	69	10	1.72588	5.79413	2.37159e-05	0.000639661	biological_process:positive regulation of synapse assembly	Asic2;Nrxn1;Prkca;Adgrl3;Ephb2;Clstn1;Flrt1;Ntrk2;Lingo2;Efna5;
GO:0034704	19	6	0.475243	12.6251	2.53302e-05	0.000680011	cellular_component:calcium channel complex	Ryr1;Ryr3;Mcu;Akap6;Micu2;Pde4d;
GO:0012505	70	10	1.7509	5.71136	2.65082e-05	0.000705045	cellular_component:endomembrane system	Agtr1a;Nbea;Tbck;Nrbp2;Tbc1d1;Cdk5rap3;Wdfy4;Sgsm1;Evi5l;Nbeal2;
GO:0090630	70	10	1.7509	5.71136	2.65082e-05	0.000705045	biological_process:activation of GTPase activity	Bcas3;Tbck;Tbc1d1;Tbc1d5;Tiam1;Sipa1l1;Ralgapb;Sgsm1;Tbc1d14;Evi5l;
GO:0035023	71	10	1.77591	5.63092	2.95773e-05	0.000783049	biological_process:regulation of Rho protein signal transduction	Sos1;Fgd4;Vav2;Arhgef33;Arhgef2;Bcr;Tiam1;Kalrn;Eps8l1;Rasgrf2;
GO:0008328	11	5	0.275141	18.1725	3.04077e-05	0.00080134	cellular_component:ionotropic glutamate receptor complex	Grik5;Shank2;Shisa9;Dlg2;Grid2;
GO:0017137	122	13	3.05156	4.26011	3.06871e-05	0.00080501	molecular_function:Rab GTPase binding	Llgl1;Ankrd27;Myo5a;Exph5;Stxbp5l;Dennd1a;Tbck;Rph3al;Tbc1d1;Tbc1d5;Sgsm1;Tbc1d14;Evi5l;
GO:0007409	105	12	2.62635	4.56909	3.27615e-05	0.000855523	biological_process:axonogenesis	Llgl1;Lingo1;App;Igf1r;Shtn1;Adcy1;Atl1;Ntng1;Dclk1;Rnf165;Kalrn;Ntn1;
GO:0001077	245	19	6.12814	3.10045	3.52771e-05	0.000917044	molecular_function:proximal promoter DNA-binding transcription activator activity, RNA polymerase II-specific	Esr2;Zfp292;Nfatc3;Meis2;Grhl1;Glis3;Ebf3;Zfat;Camta1;Trp73;Lef1;Stat3;Gli2;Stat5b;Nfatc2;Runx2;Smad2;Rfx4;Pgr;
GO:0005938	106	12	2.65136	4.52598	3.56579e-05	0.000922768	cellular_component:cell cortex	Shroom2;Gck;Hmcn2;Spire2;Spire1;Pard3;Ctnnb1;Eps8;Prkd1;Ryr1;Drd4;Rgs19;
GO:0008076	73	10	1.82594	5.47665	3.66358e-05	0.000943824	cellular_component:voltage-gated potassium channel complex	Kcng3;Cntnap2;Kcnma1;Kcnip4;Kcnq1;Kcnip1;Kcnb1;Kcnh1;Dlg2;Dpp6;
GO:0016529	58	9	1.45074	6.20372	3.72048e-05	0.000954203	cellular_component:sarcoplasmic reticulum	Dmpk;Rasd1;Camk2b;Ryr1;Jph1;Ryr3;Xdh;Akap6;Itpr3;
GO:0016874	362	24	9.05464	2.65057	4.01109e-05	0.00102416	molecular_function:ligase activity	Ube3b;Ubr5;Ttll11;Ttl;Mgrn1;Rars;Sh3rf1;Rffl;Park2;Mid1;Ctps2;Ttll5;Mkrn1;Bard1;Rnf139;Acsm1;Uba2;Ttll9;Rfwd2;Herc2;Vars2;Rnf130;Nosip;March1;
GO:0035774	32	7	0.80041	8.74552	4.03996e-05	0.00102697	biological_process:positive regulation of insulin secretion involved in cellular response to glucose stimulus	Atg7;Rfx6;Park2;Ano1;Lepr;Gpr39;Arrb1;
GO:0098779	126	13	3.15162	4.12487	4.17005e-05	0.00105537	biological_process:positive regulation of mitophagy in response to mitochondrial depolarization	Rims3;Pex13;Prkg1;Clvs1;Mylk;Tbc1d5;P2rx5;Hc;Myh11;Nup93;Dpf3;Stk32a;Park2;
GO:0032947	45	8	1.12558	7.10747	4.24715e-05	0.00107017	molecular_function:protein-containing complex scaffold activity	Gphn;Wwc2;Disc1;Akap9;Akap6;Magi2;Sash1;Magi1;
GO:0051260	185	16	4.62737	3.45769	4.27427e-05	0.0010723	biological_process:protein homooligomerization	Gphn;Kcng3;Ikbke;Atl1;P2rx5;Kctd3;Dpys;Entpd1;App;Kcnma1;Atl2;Kcnb1;Itpr3;Kctd13;Kctd16;Glra1;
GO:0006357	388	25	9.70497	2.576	4.34828e-05	0.00108612	biological_process:regulation of transcription by RNA polymerase II	Med27;Taf4b;Lmx1b;Glo1;Grhl1;Glis3;Med13l;Jmy;Rfx8;Ldb2;Kdm1a;Stat5b;Rfx6;Pknox1;Tfdp1;Mnat1;Ruvbl1;Deaf1;Wdr77;Lef1;Elmsan1;Zhx2;Ctnnb1;Glis1;Rfx4;
GO:0030334	75	10	1.87596	5.3306	4.5085e-05	0.00112127	biological_process:regulation of cell migration	Srcin1;Kif14;Ldb2;Sdc3;Lama2;Erbb4;Akt1;Unc5c;Pecam1;Ntn1;
GO:0005923	109	12	2.7264	4.40141	4.57186e-05	0.00113213	cellular_component:bicellular tight junction	Shroom2;Pard3;Magi2;Arhgef2;Ctnnb1;Frmd4a;Synpo;Ccdc85c;Pard3b;Clmp;Magi1;Tjp2;
GO:0043565	604	34	15.1077	2.2505	4.72039e-05	0.00116389	molecular_function:sequence-specific DNA binding	Hoxa3;Grhl1;Foxn3;Hnf1b;Dmrt1;Pax7;Bptf;Mta1;Snapc1;Esrrb;Mta3;Lef1;Gli2;Pgr;Hivep3;Nfatc3;Lmx1b;Prox1;Creb3l3;Camta1;Cux1;Stat5b;Nfatc2;Pknox1;Esr2;Meis2;Emx1;Rarb;Trp73;Ikzf3;Stat3;Prdm16;Rora;Zfp536;
GO:0004842	319	22	7.97909	2.75721	4.75454e-05	0.0011673	molecular_function:ubiquitin-protein transferase activity	Ube3b;Ubr5;Klhl40;Ube2e2;Klhl18;Mgrn1;Naip1;Spsb1;Kbtbd3;Kctd13;Klhl14;Gm15800;Park2;Klhl38;Klhl3;Mkrn1;Bard1;Rnf139;Herc2;Rnf130;Asb18;March1;
GO:0004871	641	35	16.0332	2.18297	4.93114e-05	0.00120551	molecular_function:obsolete signal transducer activity	P2ry6;Lgr4;Plcb3;Grm4;S1pr2;Htr7;Sufu;Plcb1;Gpr139;Calcrl;Adgrf4;Vipr1;Htr1f;Gna12;Plcg1;Agtr1a;Stat5b;Klra1;Magi2;Adgrv1;Tas1r3;Gnao1;Gpr39;Drd4;Vipr2;Gng7;Ccr8;Sctr;Gpr1;Gipr;Adgrl3;Stat3;Adgre1;Ctnnb1;Gng4;
GO:0001822	110	12	2.75141	4.3614	4.95774e-05	0.00120687	biological_process:kidney development	Agtr1a;Fmn1;Cux1;Gli2;Traf3ip1;Sulf2;Pkhd1;Ctnnb1;Pcsk5;Robo2;Pax2;Hnf1b;
GO:0030030	148	14	3.7019	3.78185	5.16258e-05	0.00125103	biological_process:cell projection organization	Atp6v0d1;Ak7;Cfap221;Cep152;Dnaaf3;Akt1;Cep89;Ift43;Traf3ip1;Rp1l1;Bbs2;Ift122;Mark4;Cc2d2a;
GO:0007156	93	11	2.32619	4.72876	5.1827e-05	0.00125103	biological_process:homophilic cell adhesion via plasma membrane adhesion molecules	Ptprt;Cdh13;Fat3;Ret;Cdh10;Clstn1;Robo2;Kirrel3;Cdhr2;Sdk2;Ptprm;
GO:0030182	111	12	2.77642	4.32211	5.37144e-05	0.00129117	biological_process:neuron differentiation	Emx1;Gfra1;Ret;Runx2;Lmx1b;Nrbp2;Cntn6;Ntrk2;Ctnnb1;Gas7;Il1rapl1;Wnt2b;
GO:0046983	189	16	4.72742	3.38451	5.41077e-05	0.0012952	molecular_function:protein dimerization activity	Npas2;Myo5a;Grin2a;Mxd1;Gpr139;Stk4;Mxi1;Ano2;Syn2;Sim2;Stat3;Stat5b;Ano1;Ano4;Tcf15;Slc4a11;
GO:0044297	94	11	2.35121	4.67845	5.6612e-05	0.00134953	cellular_component:cell body	Cacna1g;Syt11;Bptf;Nrg1;Gsto1;Gnao1;Disc1;Acot7;Cct8;Pacrg;Alk;
GO:0000977	211	17	5.2777	3.2211	5.70997e-05	0.00135359	molecular_function:RNA polymerase II regulatory region sequence-specific DNA binding	Ybx3;Lmx1b;Lmo2;Glis3;Hnf1b;Dmrt1;Creb3l3;Rarb;Zfat;Cux1;Ikzf3;Lef1;Zfp583;Rfx6;Phf21b;Glis1;Rora;
GO:0097194	13	5	0.325167	15.3767	5.72536e-05	0.00135359	biological_process:execution phase of apoptosis	Akt1;Taok1;Cflar;Bbc3;Madd;
GO:0031625	278	20	6.95356	2.87622	5.94769e-05	0.00140039	molecular_function:ubiquitin protein ligase binding	Scn5a;Rangap1;Ikbke;Aktip;Btbd9;Fhit;Sipa1l1;Rffl;Smad2;Park2;Cbs;Mid1;Ube2j1;Arrb1;Herc2;Syt11;Faf1;Asb18;Smc6;Pacrg;
GO:0008104	78	10	1.951	5.12558	6.08462e-05	0.00142098	biological_process:protein localization	Grin2a;Slc9a2;Nbea;Palm;Lrba;Ank2;Bbs2;Disc1;Clic5;Kif26b;
GO:0019898	78	10	1.951	5.12558	6.08462e-05	0.00142098	cellular_component:extrinsic component of membrane	Mgll;Wipi2;Gfra1;Bsn;Alox8;Snx30;Vps13d;Epb41l4a;Wdfy4;Nbeal2;
GO:0006904	23	6	0.575295	10.4294	6.24637e-05	0.00144118	biological_process:vesicle docking involved in exocytosis	Exoc6;Vps45;Nrxn1;Kcnb1;Exoc6b;Exoc4;
GO:0061178	23	6	0.575295	10.4294	6.24637e-05	0.00144118	biological_process:regulation of insulin secretion involved in cellular response to glucose stimulus	Lrp5;Prkce;Cacna1e;Tiam1;Nrxn1;Efna5;
GO:1990138	23	6	0.575295	10.4294	6.24637e-05	0.00144118	biological_process:neuron projection extension	Sema5b;Kdm1a;Flrt1;Iqgap1;Tiam1;Emx1;
GO:0019902	48	8	1.20061	6.66325	6.37741e-05	0.00146553	molecular_function:phosphatase binding	Sbf2;Ppp1r21;Syk;Sfi1;Wnk1;Smad2;Sh3gl1;Magi2;
GO:0060079	35	7	0.875448	7.99591	6.64536e-05	0.00151074	biological_process:excitatory postsynaptic potential	Grid2;Grin2a;Ppp1r9a;Dgki;Grik5;Atxn1;Grin2b;
GO:0014904	6	4	0.150077	26.653	6.65304e-05	0.00151074	biological_process:myotube cell development	Nfatc2;Dmd;Nfatc3;Igf1;
GO:0090031	6	4	0.150077	26.653	6.65304e-05	0.00151074	biological_process:positive regulation of steroid hormone biosynthetic process	Por;Igf2;Igf1r;Igf1;
GO:0008360	133	13	3.3267	3.90777	6.93657e-05	0.00156892	biological_process:regulation of cell shape	Gna12;Fgd4;Arhgap15;Palm;Arap1;Fmnl3;Baiap2;Wipf1;Diaph1;Cdc42se2;Wipf3;Eps8;Gas7;
GO:0021766	49	8	1.22563	6.52727	7.25932e-05	0.00163548	biological_process:hippocampus development	Ogdh;Bbs2;Ptprs;Kif14;Trp73;Kirrel3;Reln;Lef1;
GO:0003777	64	9	1.60082	5.62212	7.404e-05	0.00166156	molecular_function:microtubule motor activity	Dnah17;Kif14;Dnah12;Dnah6;Dnah8;Kifc2;Dnah1;Kif18b;Kif26b;
GO:0043547	134	13	3.35172	3.87861	7.43935e-05	0.001663	biological_process:positive regulation of GTPase activity	Ankrd27;Bcas3;Dennd1a;Arap1;Arhgap21;Rasgef1b;Bin1;Arhgap23;Sh3bgrl3;Arhgap27;Rapgef4;Gnao1;Kalrn;
GO:0006874	98	11	2.45126	4.4875	7.97342e-05	0.00177548	biological_process:cellular calcium ion homeostasis	Prkca;Ryr3;Tpcn2;Clstn1;Dmpk;Ank2;Pkhd1;Trpv4;Ryr1;Cacna1c;Cacnb4;
GO:0042733	65	9	1.62583	5.53562	8.24616e-05	0.00182912	biological_process:embryonic digit morphogenesis	Lrp5;Gna12;Chst11;Gli2;Traf3ip1;Ror2;Ift122;Ctnnb1;Lmbr1;
GO:0045121	240	18	6.00307	2.99846	8.28625e-05	0.00183094	cellular_component:membrane raft	Prkca;Eef2;Pag1;Ret;Dcc;Hyal2;Lamp2;Erbb4;Pecam1;App;Cflar;Itln1;Kcnq1;Dmd;Slc6a3;Iqgap1;Park2;Rgs19;
GO:0046777	177	15	4.42727	3.38809	9.00198e-05	0.00198147	biological_process:protein autophosphorylation	Camkk2;Fgfr3;Syk;Prkca;Wnk1;Ntrk2;Bcr;Stk4;Camk2b;Erbb4;Tnik;Igf1r;Wnk2;Prkd1;Alk;
GO:0005261	37	7	0.925474	7.56369	9.044e-05	0.00198312	molecular_function:cation channel activity	Piezo2;Grin2a;Asic2;Trpv4;Cacna1i;Nalcn;Grin2b;
GO:0002092	25	6	0.62532	9.59509	9.28399e-05	0.00202552	biological_process:positive regulation of receptor internalization	Tbc1d5;Syk;Pard3;Ptpn5;Arrb1;Magi2;
GO:0031532	51	8	1.27565	6.27129	9.32808e-05	0.00202552	biological_process:actin cytoskeleton reorganization	Tnik;Parvb;Cdc42bpb;Sipa1l1;Eps8;Trpv4;S1pr2;Phactr1;
GO:0006508	573	32	14.3323	2.23271	9.34314e-05	0.00202552	biological_process:proteolysis	Adamts10;Pcsk5;Adamts18;Agbl4;Rnpepl1;Nln;Adam33;Trhde;Dpp6;Scpep1;Agbl1;Adamts12;C2;Dpp8;Bmp1;Reln;Tmprss11e;Atg4c;Agbl2;Adam19;Gm5771;Lmln;Capn5;Mbtps1;Metap1d;Tpp2;Gzmk;C1rb;Sppl3;Cflar;Pcsk2;Senp8;
GO:0006417	119	12	2.97653	4.03155	9.89728e-05	0.00213759	biological_process:regulation of translation	App;Ctif;Boll;Larp4b;Zfp385a;Dnajc1;Akt1;Ago2;Igf1;Pum3;Eif4g1;Piwil2;
GO:0004012	15	5	0.375192	13.3265	9.94516e-05	0.00213989	molecular_function:phospholipid-translocating ATPase activity	Atp11a;Atp9b;Atp9a;Atp10b;Atp11c;
GO:0005575	6628	222	165.785	1.33908	9.99948e-05	0.00214354	cellular_component:cellular_component	Cachd1;n-TQttg5;Ttll11;4930467E23Rik;6330409D20Rik;B430306N03Rik;Ccdc71;Vwa3b;Fam117b;Xxylt1;Gm1043;Zfp362;1110046J04Rik;Mboat1;Ccser1;Atrnl1;Igf1os;Hmgxb3;1700102P08Rik;Elmod3;Iffo2;Ggt7;Muc6;Gm14393;Dnaaf3;Pard3b;Gm3404;Tmem56;Mapkbp1;4930533K18Rik;n-TMcat6;Fbxw27;CK137956;Lin54;Ankrd31;4930546C10Rik;Slc10a7;1700112E06Rik;Stfa2l1;Neurl4;Gm10354;A630010A05Rik;Cmip;Tmc3;Ankrd60;6030468B19Rik;Tepp…
GO:0031234	67	9	1.67586	5.37038	0.00010173	0.00217264	cellular_component:extrinsic component of cytoplasmic side of plasma membrane	Syk;Gphn;Alox15;Kcnip1;Cyth3;Tiam1;Tec;Ryr1;Iqgap1;
GO:0086091	26	6	0.650333	9.22604	0.000111894	0.00237157	biological_process:regulation of heart rate by cardiac conduction	Cacna1c;Scn5a;Ank2;Cacna1d;Ctnna3;Kcnq1;
GO:0002039	68	9	1.70087	5.29141	0.000112696	0.00237157	molecular_function:p53 binding	Tep1;Zmat4;Eef2;Trp73;Kdm1a;Pttg1ip;Trim29;Zfp385a;Rffl;
GO:0005884	68	9	1.70087	5.29141	0.000112696	0.00237157	cellular_component:actin filament	Myo5a;Gck;Fmn1;Wipf1;Lcp1;Pawr;Wipf3;Gas7;Pls1;
GO:0043087	68	9	1.70087	5.29141	0.000112696	0.00237157	biological_process:regulation of GTPase activity	Rasa2;Vav2;Prkg1;Dgki;Ntrk2;Tiam1;Sipa1l1;Iqgap1;Efna5;
GO:0002376	380	24	9.50487	2.52502	0.000122564	0.00256694	biological_process:immune system process	Tnfrsf13b;Prkce;Lgr4;Pag1;Akirin2;Hc;Cd244;Zc3hav1;Sp110;H60b;Mst1r;Clec4a2;Tec;Map3k5;Klrg1;Spon2;Syk;Arhgef2;C1rb;C2;Adgre1;Prkd1;C9;March1;
GO:0006814	122	12	3.05156	3.93241	0.000122873	0.00256694	biological_process:sodium ion transport	Scn5a;Slc9a9;Slc5a6;Slc5a4b;Asic2;Scn10a;Slc9a2;Slc10a7;Scn8a;Slc5a3;Slc4a11;Nalcn;
GO:0086004	16	5	0.400205	12.4936	0.000127892	0.00265248	biological_process:regulation of cardiac muscle cell contraction	Scn5a;Pde4b;Ank2;Akap6;Pde4d;
GO:1900273	16	5	0.400205	12.4936	0.000127892	0.00265248	biological_process:positive regulation of long-term synaptic potentiation	Reln;Kalrn;Grin2a;Ptpn5;Grin2b;
GO:0016757	205	16	5.12763	3.12035	0.000130504	0.00269692	molecular_function:transferase activity, transferring glycosyl groups	Sec1;Ext1;St3gal2;Fut10;Parp1;Aprt;St8sia1;Galnt13;Dpy19l3;Galnt16;Alg8;4930568D16Rik;Galnt2;St6galnac3;Chsy1;Xxylt1;
GO:0019722	40	7	1.00051	6.99641	0.000139216	0.00286665	biological_process:calcium-mediated signaling	Agtr1a;Cacna1d;Mcu;Plcg1;Ppp1r9a;Tox3;Tpcn2;
GO:0032587	55	8	1.3757	5.8152	0.00014939	0.00306517	cellular_component:ruffle membrane	Arhgef2;Tiam1;Eps8;Trpv4;Synj2;Eps8l1;Diaph1;Pacsin1;
GO:0008599	8	4	0.200103	19.9897	0.000150775	0.00308257	molecular_function:protein phosphatase regulator activity	Ppp1r14b;Phactr1;Wbp11;Ppp1r16b;
GO:0005912	41	7	1.02553	6.82577	0.000159542	0.00323877	cellular_component:adherens junction	Ctnnb1;Ctnna3;Trpv4;Fam129b;Pard3;Magi1;Efna5;
GO:0046676	41	7	1.02553	6.82577	0.000159542	0.00323877	biological_process:negative regulation of insulin secretion	Oit1;Stxbp5l;Kcnq1;Rptor;Park2;Kcnb1;Midn;
GO:0045333	17	5	0.425218	11.7587	0.000162164	0.0032461	biological_process:cellular respiration	Fastkd1;Fastkd2;Ndufs4;Nfatc3;ND1;
GO:0050966	17	5	0.425218	11.7587	0.000162164	0.0032461	biological_process:detection of mechanical stimulus involved in sensory perception of pain	Grin2a;Ano1;Htr7;Grin2b;Pawr;
GO:0051056	17	5	0.425218	11.7587	0.000162164	0.0032461	biological_process:regulation of small GTPase mediated signal transduction	Sipa1l2;Sipa1l1;Rap1gap2;Ralgapb;Arhgap26;
GO:1900006	17	5	0.425218	11.7587	0.000162164	0.0032461	biological_process:positive regulation of dendrite development	Pacsin1;Vldlr;Opa1;Bmp5;Iqgap1;
GO:0005881	56	8	1.40072	5.71136	0.000167075	0.00333279	cellular_component:cytoplasmic microtubule	Odf3l2;Mid1;Trpv4;Synj2;Bcas3;Clmp;Rgs19;Sctr;
GO:0030315	57	8	1.42573	5.61116	0.000186444	0.00370631	cellular_component:T-tubule	Scn5a;Ank2;Kcnn2;Igf1r;Ryr1;Cacna1c;Bin1;Akap6;
GO:0097060	29	6	0.725372	8.27162	0.000188217	0.00372865	cellular_component:synaptic membrane	Akap9;Nipsnap1;Dgki;Rims4;Olfm1;Entpd1;
GO:0003713	170	14	4.25218	3.29243	0.000199962	0.00394771	molecular_function:transcription coactivator activity	Sertad2;Med27;Cenpj;Dcc;Mta1;Jmy;Esrrb;Rbpms;Gtf2a1l;Maml2;Ctnnb1;Tfdp1;Taf6l;Prdm16;
GO:0010613	18	5	0.450231	11.1054	0.000203026	0.00396729	biological_process:positive regulation of cardiac muscle hypertrophy	Pde9a;Igf1;Adk;Parp1;Prkca;
GO:0048148	18	5	0.450231	11.1054	0.000203026	0.00396729	biological_process:behavioral response to cocaine	Kalrn;Abat;Parp1;Drd4;Sdk1;
GO:0061003	18	5	0.450231	11.1054	0.000203026	0.00396729	biological_process:positive regulation of dendritic spine morphogenesis	Reln;Kalrn;Tiam1;Baiap2;Camk2b;
GO:0071277	43	7	1.07555	6.50829	0.000207394	0.00401607	biological_process:cellular response to calcium ion	Scn5a;Kcnh1;Alox15;Iqgap1;Nfatc3;Mylk;Adgrv1;
GO:0010008	58	8	1.45074	5.51442	0.00020762	0.00401607	cellular_component:endosome membrane	Ap3d1;Tbc1d5;Vps28;Rffl;Ret;Vps45;Tpcn2;Pmepa1;
GO:0071407	58	8	1.45074	5.51442	0.00020762	0.00401607	biological_process:cellular response to organic cyclic compound	P2ry6;Pak4;Rae1;Alpl;Akt1;Stat3;Gli2;Rgs19;
GO:0030426	130	12	3.25167	3.69042	0.000212074	0.00408848	cellular_component:growth cone	Exoc4;Ppp1r9a;Erc2;Shank2;Ntrk2;Utrn;App;Rapgef4;Shtn1;Trpv4;Iqgap1;Pcdh9;
GO:0042165	9	4	0.225115	17.7687	0.000213551	0.00410318	molecular_function:neurotransmitter binding	Nipsnap1;Grin2b;Grin2a;Slc6a11;
GO:0005581	75	9	1.87596	4.79754	0.000220616	0.00422161	cellular_component:collagen trimer	Col5a1;Col25a1;Col8a1;Col12a1;Col23a1;Col15a1;Col14a1;Col2a1;Col27a1;
GO:0012506	30	6	0.750384	7.99591	0.000221184	0.00422161	cellular_component:vesicle membrane	Agtr1a;Slc5a6;Fndc3a;Acpp;Grb2;Drd4;
GO:0010212	44	7	1.10056	6.36038	0.000235319	0.00447651	biological_process:response to ionizing radiation	Babam1;Bre;Mta1;Brat1;Rad51b;Rfwd2;Topbp1;
GO:0007166	218	16	5.45279	2.93428	0.000249726	0.00471766	biological_process:cell surface receptor signaling pathway	Tnfrsf13b;Syk;Sctr;P2rx5;Calcrl;Adgrf4;Vipr1;Adgrd1;Gipr;Adgrl3;Adgre1;Adgrv1;Spn;Klrg1;Vipr2;Tspan9;
GO:0001508	19	5	0.475243	10.5209	0.00025128	0.00471766	biological_process:action potential	Cacna1g;Grin2a;Kcnb1;Glra1;Grin2b;
GO:0030673	19	5	0.475243	10.5209	0.00025128	0.00471766	cellular_component:axolemma	Nrg1;Kcnh1;Cntnap2;Robo2;Myo1d;
GO:0031290	19	5	0.475243	10.5209	0.00025128	0.00471766	biological_process:retinal ganglion cell axon guidance	Sema4f;Ptprm;Efna5;Robo2;Ephb2;
GO:0001725	60	8	1.50077	5.3306	0.000255897	0.00478869	cellular_component:stress fiber	Mst1r;Lima1;Myh11;Mprip;Daam1;Mylk;Sept9;Lcp1;
GO:0032266	31	6	0.775397	7.73797	0.000258531	0.00482227	molecular_function:phosphatidylinositol-3-phosphate binding	Sh3pxd2b;Dennd1a;Zfyve26;Pard3;Vps36;Wipi2;
GO:0007030	77	9	1.92599	4.67293	0.000263786	0.00490437	biological_process:Golgi organization	Myo18a;Bcas3;Atl2;l7Rn6;Syne1;Arhgap21;Nsfl1c;Gbf1;Prkd1;
GO:0015631	45	7	1.12558	6.21903	0.000266191	0.00493313	molecular_function:tubulin binding	Kif14;Agbl4;Agbl1;Park2;Traf3ip1;Cenpj;Cdk5rap2;
GO:0001938	61	8	1.52578	5.24321	0.000283269	0.00519929	biological_process:positive regulation of endothelial cell proliferation	Cdh13;Fgfr3;Ppp1r16b;Prkd1;Prkca;Akt1;Prox1;Rptor;
GO:0048812	61	8	1.52578	5.24321	0.000283269	0.00519929	biological_process:neuron projection morphogenesis	Ankrd27;Lifr;Gas7;Shtn1;Kirrel3;Atxn2;Pacsin1;Myo16;
GO:0070373	61	8	1.52578	5.24321	0.000283269	0.00519929	biological_process:negative regulation of ERK1 and ERK2 cascade	E130311K13Rik;Ptprr;Dmd;Igf1;Wnk2;Dusp4;Arrb1;Synj2bp;
GO:0005267	78	9	1.951	4.61302	0.00028786	0.00525009	molecular_function:potassium channel activity	Kcng3;Kcnma1;Kcnip4;Kcnq1;Kcnip1;Kcnb1;Kcnh8;Kcnh1;Kcnk13;
GO:0006886	221	16	5.52783	2.89444	0.000287864	0.00525009	biological_process:intracellular protein transport	Exph5;Stam;Tbck;Ap3d1;Tbc1d1;Tom1l2;Vti1a;Sgsm1;Tbc1d14;Dscr3;Rph3al;Tbc1d5;Ap4s1;Rffl;Xpo7;Evi5l;
GO:0070886	10	4	0.250128	15.9918	0.000293164	0.00531302	biological_process:positive regulation of calcineurin-NFAT signaling cascade	Nrg1;Akap6;Igf1;Sppl3;
GO:1901800	10	4	0.250128	15.9918	0.000293164	0.00531302	biological_process:positive regulation of proteasomal protein catabolic process	Ecscr;Park2;Osbpl7;Ddrgk1;
GO:0008237	156	13	3.902	3.33163	0.000298553	0.00539367	molecular_function:metallopeptidase activity	Agbl1;Adamts10;Agbl2;Adam19;Lmln;Adamts18;Adamts12;Adamtsl2;Agbl4;Nln;Adam33;Trhde;Bmp1;
GO:0005248	20	5	0.500256	9.99488	0.000307768	0.00554271	molecular_function:voltage-gated sodium channel activity	Scn5a;Asic2;Scn8a;Scn10a;Scn7a;
GO:0007517	62	8	1.55079	5.15865	0.000312984	0.00561476	biological_process:muscle organ development	Tmem8c;Nrg1;Dmd;Pax7;Jph1;Tcf15;Suv420h1;Scn8a;
GO:0000902	79	9	1.97601	4.55463	0.000313723	0.00561476	biological_process:cell morphogenesis	Dmrt1;Shroom2;Ptpro;Ephb2;Arhgef2;Stk4;Nrg1;Idua;Slc39a3;
GO:0030027	137	12	3.42676	3.50185	0.000330517	0.00588604	cellular_component:lamellipodium	Fgd4;Ppp1r9a;Plcg1;Sh3bgrl3;Srcin1;Parvb;Shtn1;Mylk;Ctnnb1;Ctnna3;Trpv4;Ptprm;
GO:0001525	224	16	5.60287	2.85568	0.00033093	0.00588604	biological_process:angiogenesis	Syk;Tie1;Prkca;Bcas3;Col8a1;Setd2;Ephb2;Calcrl;Fmnl3;Pecam1;Vav2;Pknox1;Prkd1;Ecscr;Lepr;Rora;
GO:0050731	98	10	2.45126	4.07954	0.000335425	0.00594758	biological_process:positive regulation of peptidyl-tyrosine phosphorylation	Fgfr3;Syk;Reln;Arhgef2;Nrg1;Igf2;Tec;Plpp3;Igf1;Efna5;
GO:0005769	180	14	4.50231	3.10952	0.000343579	0.00607342	cellular_component:early endosome	Atp6v0d1;Ankrd27;Myo5a;Vps28;Cntnap2;Rab31;Ret;Mgrn1;Lipc;Wdfy2;Vps8;Kcnq1;Rps6kc1;Atp9a;
GO:0000165	63	8	1.57581	5.07676	0.000345191	0.0060832	biological_process:MAPK cascade	Fgfr3;Nrg1;Map2k5;Ppm1l;Map3k5;Ndst1;Ret;Map2k6;
GO:0005154	33	6	0.825423	7.269	0.000347975	0.0061135	molecular_function:epidermal growth factor receptor binding	Lingo1;Nrg2;Erbb4;Vav2;Atxn2;Grb2;
GO:0005770	118	11	2.95151	3.7269	0.000354057	0.00620139	cellular_component:late endosome	Ankrd27;Myo5a;Zc3hav1;Stard3;Kcnq1;Rab31;Magi2;Lamp1;Lamp2;Vps36;Lipc;
GO:0010001	21	5	0.525269	9.51893	0.000373368	0.00650001	biological_process:glial cell differentiation	Reln;Igf1;Nrg1;Pax2;Metrn;
GO:0072001	21	5	0.525269	9.51893	0.000373368	0.00650001	biological_process:renal system development	Mecom;Ctnnb1;Sec63;Nup93;Pax2;
GO:0000978	335	21	8.37929	2.50618	0.000376773	0.00653946	molecular_function:RNA polymerase II proximal promoter sequence-specific DNA binding	Nfatc3;Grhl1;Glis3;Ebf3;Rfx8;Nfatc2;Rfx6;Smad2;Esr2;Mxd1;Aebp2;Meis2;Pax2;Trp73;Lef1;Stat3;Gli2;Runx2;Rfx4;Zfp536;Pgr;
GO:0001228	100	10	2.50128	3.99795	0.000388714	0.00670619	molecular_function:DNA-binding transcription activator activity, RNA polymerase II-specific	Dmrt1;Creb3l3;Ikzf3;Lef1;Stat3;Nfatc3;Rfx6;Pknox1;Lmo2;Glis1;
GO:0007010	100	10	2.50128	3.99795	0.000388714	0.00670619	biological_process:cytoskeleton organization	Tnik;Diaph1;Pacsin1;Palm;Ftcd;Dock1;Ablim2;Bfsp2;Fmnl3;Akt1;
GO:0008331	11	4	0.275141	14.538	0.000392009	0.00672267	molecular_function:high voltage-gated calcium channel activity	Cacna1c;Cacnb4;Cacna1e;Cacna1d;
GO:2001223	11	4	0.275141	14.538	0.000392009	0.00672267	biological_process:negative regulation of neuron migration	Nrg1;Olfm1;Stat3;Erbb4;
GO:0016192	205	15	5.12763	2.92533	0.000394529	0.00674574	biological_process:vesicle-mediated transport	Trip10;Myo5a;Trappc10;Stxbp6;Stxbp5l;Spire2;Bcas3;Vps45;Ap3d1;Rabep1;Vti1a;Spire1;Trappc12;Ap4s1;Gbf1;
GO:0043679	82	9	2.05105	4.38799	0.000403065	0.00686492	cellular_component:axon terminus	Atp6v0d1;Dgki;Pacsin1;Ntrk2;Synj2;Bin1;Drd4;Htr7;Pgr;
GO:0000139	120	11	3.00154	3.66479	0.000403889	0.00686492	cellular_component:Golgi membrane	Man1c1;Prkce;Man2a1;Fut10;Rfwd2;BC004004;Vps45;Ftcd;Pmepa1;Hyal2;Park2;
GO:0043161	141	12	3.52681	3.40251	0.000420435	0.00712507	biological_process:proteasome-mediated ubiquitin-dependent protein catabolic process	Kif14;6330408A02Rik;Rnf139;Mta1;Rnf165;Arrb1;Btbd9;Faf1;Nsfl1c;Kctd13;Rffl;Park2;
GO:0008081	49	7	1.22563	5.71136	0.000423786	0.00713974	molecular_function:phosphoric diester hydrolase activity	Pde9a;Plcg1;Pde4d;Pde3a;Plcb3;Pde4a;Plcb1;
GO:0032024	49	7	1.22563	5.71136	0.000423786	0.00713974	biological_process:positive regulation of insulin secretion	Mgea5;Prkce;Abat;Gipr;Gck;Mcu;Gpr39;
GO:0044822	1067	47	26.6887	1.76105	0.000425624	0.00714973	molecular_function:RNA binding	Bccip;Parp1;Ybx3;Lrp1;Myo5a;Eef2;Rbm5;Diaph1;Tbl3;Pum3;Ralyl;Myo18a;Fastkd2;Nsun2;Pop7;Gtpbp1;Syne1;Raly;Wbp11;Pdcd11;Fndc3a;Snd1;Pcbp3;Zfp638;Mkrn1;Zfp385a;Col14a1;Eif4g1;Secisbp2l;Larp4b;Nosip;Grb2;Fastkd1;Atxn2;Zc3hav1;Safb2;Helz;Prrc2c;Fndc3b;Sec63;Rbm34;Mrpl22;Csrp1;Rbpms;Dhx36;Ago2;Adk;
GO:0001649	102	10	2.55131	3.91956	0.00044886	0.00751807	biological_process:osteoblast differentiation	Snd1;Lgr4;Alpl;Mrc2;Lef1;Gli2;Runx2;Igf2;Akt1;Igf1;
GO:0009897	303	19	7.57888	2.50697	0.000454265	0.00758648	cellular_component:external side of plasma membrane	Tnfrsf13b;Tnfrsf11a;Adam19;Klra7;Cd244;Itga2b;Klra1;Map3k5;Glra1;Nrg1;Pecam1;Cdh13;Gfra1;Kcnma1;Adgre1;Ano1;Lamp1;Spn;Cd200r2;
GO:0030879	35	6	0.875448	6.85363	0.000459955	0.00763711	biological_process:mammary gland development	Igf1r;Igf1;Lef1;Gli2;Ntn1;Pgr;
GO:0031338	35	6	0.875448	6.85363	0.000459955	0.00763711	biological_process:regulation of vesicle fusion	Tbc1d1;Tbc1d5;Tbck;Sgsm1;Tbc1d14;Evi5l;
GO:0004222	103	10	2.57632	3.88151	0.000481711	0.0079753	molecular_function:metalloendopeptidase activity	Adamtsl2;Adamts10;Adam19;Lmln;Nln;Thsd4;Adam33;Bmp1;Adamts18;Adamts12;
GO:0008344	67	8	1.67586	4.77367	0.000502126	0.00828941	biological_process:adult locomotory behavior	Btbd9;App;Scn8a;Bc1;Eps8;Park2;Drd4;Atxn1;
GO:0006198	12	4	0.300154	13.3265	0.000512543	0.00836523	biological_process:cAMP catabolic process	Pde4a;Pde4b;Pde4d;Pde3a;
GO:0048009	12	4	0.300154	13.3265	0.000512543	0.00836523	biological_process:insulin-like growth factor receptor signaling pathway	Akt1;Igf1r;Igf1;Plcb1;
GO:0051764	12	4	0.300154	13.3265	0.000512543	0.00836523	biological_process:actin crosslink formation	Eps8;Baiap2;Lcp1;Pls1;
GO:0061001	12	4	0.300154	13.3265	0.000512543	0.00836523	biological_process:regulation of dendritic spine morphogenesis	Srcin1;Sipa1l1;Dnm3;Ppp1r9a;
GO:0043410	104	10	2.60133	3.84418	0.00051653	0.00840642	biological_process:positive regulation of MAPK cascade	Prkce;Fgfr3;Igf1r;Tnfrsf11a;Ntrk2;Ksr1;Ctnnb1;Igf2;Igf1;Lepr;
GO:0060076	36	6	0.900461	6.66325	0.000525538	0.00852135	cellular_component:excitatory synapse	Ntrk2;Rapgef4;Bsn;Pde4b;Dgki;Syt11;
GO:0009055	51	7	1.27565	5.48738	0.000526559	0.00852135	molecular_function:electron transfer activity	Sh3bgrl3;Acox3;Por;Fdx1;CYTB;Xdh;COX1;
GO:0005506	145	12	3.62686	3.30865	0.000530151	0.00855538	molecular_function:iron ion binding	Fdx1;Cyp2b19;Phf8;Alox15;Pah;Alox8;Xdh;COX1;Mina;Cyp2d9;Cyp20a1;Cyp27a1;
GO:0070412	23	5	0.575295	8.69119	0.000535609	0.00859518	molecular_function:R-SMAD binding	Smad2;Ranbp3;Ldlrad4;Parp1;Pmepa1;
GO:0071889	23	5	0.575295	8.69119	0.000535609	0.00859518	molecular_function:14-3-3 protein binding	Akt1;Prkce;Rptor;Synpo2;Kcnh1;
GO:0031252	52	7	1.30067	5.38186	0.000584885	0.00933378	cellular_component:cell leading edge	Gbf1;Shtn1;Ldb2;Bcas3;Raph1;Iqgap1;Jmy;
GO:0060348	52	7	1.30067	5.38186	0.000584885	0.00933378	biological_process:bone development	Lrp5;Papss2;Fgfr3;Sulf2;Rarb;Sh3pxd2b;Col2a1;
GO:0006813	126	11	3.15162	3.49027	0.000589928	0.00938819	biological_process:potassium ion transport	Kcng3;Kcnma1;Kcnip4;Kcnq1;Kcnip1;Kcnb1;Kcnh8;Kcnn2;Kcnh1;Kcnk13;Kcnj6;
GO:0019903	87	9	2.17611	4.13581	0.000597872	0.00948833	molecular_function:protein phosphatase binding	Gck;Stat3;Pard3;Stat5b;Ctnnb1;Map3k5;Dlg2;Iqgap1;Grb2;
GO:0017157	24	5	0.600308	8.32906	0.000634181	0.0100368	biological_process:regulation of exocytosis	Rab3c;Myo5a;Rph3al;Rapgef4;Stxbp5l;
GO:0048705	53	7	1.32568	5.28031	0.000648223	0.0102309	biological_process:skeletal system morphogenesis	Hyal2;Fmn1;Col2a1;Idua;Tcf15;Runx2;Wdr48;
GO:0071944	70	8	1.7509	4.56909	0.000654154	0.0102436	cellular_component:cell periphery	Prkce;Bcas3;Pde4b;Adgre1;Ctnnb1;Pecam1;Ntn1;Efna5;
GO:0071625	13	4	0.325167	12.3014	0.000657263	0.0102436	biological_process:vocalization behavior	Nrxn1;Shank2;Nrxn2;Cntnap2;
GO:0008766	240	16	6.00307	2.6653	0.000666862	0.0102436	molecular_function:UDP-N-acetylmuramoylalanyl-D-glutamyl-2,6-diaminopimelate-D-alanyl-D-alanine ligase activity	Ube3b;Ubr5;Mid1;Mkrn1;Bard1;Rnf139;Uba2;Mgrn1;Sh3rf1;Rfwd2;Herc2;Rnf130;Rffl;Nosip;Park2;March1;
GO:0018169	240	16	6.00307	2.6653	0.000666862	0.0102436	molecular_function:ribosomal S6-glutamic acid ligase activity	Ube3b;Ubr5;Mid1;Mkrn1;Bard1;Rnf139;Uba2;Mgrn1;Sh3rf1;Rfwd2;Herc2;Rnf130;Rffl;Nosip;Park2;March1;
GO:0043773	240	16	6.00307	2.6653	0.000666862	0.0102436	molecular_function:coenzyme F420-0 gamma-glutamyl ligase activity	Ube3b;Ubr5;Mid1;Mkrn1;Bard1;Rnf139;Uba2;Mgrn1;Sh3rf1;Rfwd2;Herc2;Rnf130;Rffl;Nosip;Park2;March1;
GO:0043774	240	16	6.00307	2.6653	0.000666862	0.0102436	molecular_function:coenzyme F420-2 alpha-glutamyl ligase activity	Ube3b;Ubr5;Mid1;Mkrn1;Bard1;Rnf139;Uba2;Mgrn1;Sh3rf1;Rfwd2;Herc2;Rnf130;Rffl;Nosip;Park2;March1;
GO:0070735	240	16	6.00307	2.6653	0.000666862	0.0102436	molecular_function:protein-glycine ligase activity	Ube3b;Ubr5;Mid1;Mkrn1;Bard1;Rnf139;Uba2;Mgrn1;Sh3rf1;Rfwd2;Herc2;Rnf130;Rffl;Nosip;Park2;March1;
GO:0070736	240	16	6.00307	2.6653	0.000666862	0.0102436	molecular_function:protein-glycine ligase activity, initiating	Ube3b;Ubr5;Mid1;Mkrn1;Bard1;Rnf139;Uba2;Mgrn1;Sh3rf1;Rfwd2;Herc2;Rnf130;Rffl;Nosip;Park2;March1;
GO:0070737	240	16	6.00307	2.6653	0.000666862	0.0102436	molecular_function:protein-glycine ligase activity, elongating	Ube3b;Ubr5;Mid1;Mkrn1;Bard1;Rnf139;Uba2;Mgrn1;Sh3rf1;Rfwd2;Herc2;Rnf130;Rffl;Nosip;Park2;March1;
GO:0070738	240	16	6.00307	2.6653	0.000666862	0.0102436	molecular_function:tubulin-glycine ligase activity	Ube3b;Ubr5;Mid1;Mkrn1;Bard1;Rnf139;Uba2;Mgrn1;Sh3rf1;Rfwd2;Herc2;Rnf130;Rffl;Nosip;Park2;March1;
GO:0005623	108	10	2.70138	3.70181	0.000677321	0.0103643	cellular_component:cell	Llgl1;Sun1;Exoc4;Palm;Syne1;Ston2;Arhgap21;Sun3;Appbp2;Slc4a11;
GO:0050714	38	6	0.950487	6.31255	0.000678328	0.0103643	biological_process:positive regulation of protein secretion	Exph5;Rapgef4;Stxbp5l;Myo18a;Igf1;Rph3al;
GO:0001503	89	9	2.22614	4.04287	0.000694719	0.0105866	biological_process:ossification	Ext1;Alox15;Tnfrsf11a;Sbno2;Dhx36;Igf2;Col2a1;Bmp1;Bmp5;
GO:0008285	363	21	9.07965	2.31286	0.000707116	0.0106572	biological_process:negative regulation of cell proliferation	Slit3;Prkca;Erbb4;Prox1;Bmp5;Alox8;Magi2;Ror2;Smad2;Esr2;Fgfr3;Phf14;Rnf139;Stk4;Cdh13;Rarb;Wdr77;Stat3;Wnk2;Ctnnb1;Igf1;
GO:0070739	242	16	6.0531	2.64327	0.000724429	0.0106572	molecular_function:protein-glutamic acid ligase activity	Ube3b;Ubr5;Mid1;Mkrn1;Bard1;Rnf139;Uba2;Mgrn1;Sh3rf1;Rfwd2;Herc2;Rnf130;Rffl;Nosip;Park2;March1;
GO:0070740	242	16	6.0531	2.64327	0.000724429	0.0106572	molecular_function:tubulin-glutamic acid ligase activity	Ube3b;Ubr5;Mid1;Mkrn1;Bard1;Rnf139;Uba2;Mgrn1;Sh3rf1;Rfwd2;Herc2;Rnf130;Rffl;Nosip;Park2;March1;
GO:0007256	5	3	0.125064	23.9877	0.000744518	0.0106572	biological_process:activation of JNKK activity	Mapkbp1;Ercc6;Tnik;
GO:0030835	5	3	0.125064	23.9877	0.000744518	0.0106572	biological_process:negative regulation of actin filament depolymerization	Shroom2;Specc1l;Lima1;
GO:0033564	5	3	0.125064	23.9877	0.000744518	0.0106572	biological_process:anterior/posterior axon guidance	Ntn1;Unc5c;Dcc;
GO:0035610	5	3	0.125064	23.9877	0.000744518	0.0106572	biological_process:protein side chain deglutamylation	Agbl1;Agbl2;Agbl4;
GO:0042538	5	3	0.125064	23.9877	0.000744518	0.0106572	biological_process:hyperosmotic salinity response	Trip10;Trpv4;CYTB;
GO:0042773	5	3	0.125064	23.9877	0.000744518	0.0106572	biological_process:ATP synthesis coupled electron transport	ND5;ND4L;ND4;
GO:0048787	5	3	0.125064	23.9877	0.000744518	0.0106572	cellular_component:presynaptic active zone membrane	Grm4;Kcnma1;Syt11;
GO:0050974	5	3	0.125064	23.9877	0.000744518	0.0106572	biological_process:detection of mechanical stimulus involved in sensory perception	Piezo2;Igf1;Asic2;
GO:0051823	5	3	0.125064	23.9877	0.000744518	0.0106572	biological_process:regulation of synapse structural plasticity	Ppp1r9a;Ncan;Dmpk;
GO:0072675	5	3	0.125064	23.9877	0.000744518	0.0106572	biological_process:osteoclast fusion	Sbno2;Cd109;Sh3pxd2a;
GO:0004112	25	5	0.62532	7.99591	0.000745726	0.0106572	molecular_function:cyclic-nucleotide phosphodiesterase activity	Pde4a;Pde9a;Pde4b;Pde4d;Pde3a;
GO:0004117	25	5	0.62532	7.99591	0.000745726	0.0106572	molecular_function:calmodulin-dependent cyclic-nucleotide phosphodiesterase activity	Pde4a;Pde9a;Pde4b;Pde4d;Pde3a;
GO:0004118	25	5	0.62532	7.99591	0.000745726	0.0106572	molecular_function:cGMP-stimulated cyclic-nucleotide phosphodiesterase activity	Pde4a;Pde9a;Pde4b;Pde4d;Pde3a;
GO:0004119	25	5	0.62532	7.99591	0.000745726	0.0106572	molecular_function:cGMP-inhibited cyclic-nucleotide phosphodiesterase activity	Pde4a;Pde9a;Pde4b;Pde4d;Pde3a;
GO:0004120	25	5	0.62532	7.99591	0.000745726	0.0106572	molecular_function:photoreceptor cyclic-nucleotide phosphodiesterase activity	Pde4a;Pde9a;Pde4b;Pde4d;Pde3a;
GO:0030100	25	5	0.62532	7.99591	0.000745726	0.0106572	biological_process:regulation of endocytosis	Cdh13;Bin1;Ston2;Synj2bp;Arhgap21;
GO:0044688	25	5	0.62532	7.99591	0.000745726	0.0106572	molecular_function:7,8-dihydro-D-neopterin 2',3'-cyclic phosphate phosphodiesterase activity	Pde4a;Pde9a;Pde4b;Pde4d;Pde3a;
GO:0048786	25	5	0.62532	7.99591	0.000745726	0.0106572	cellular_component:presynaptic active zone	Bsn;Shank2;Ntrk2;Dgki;Erc2;
GO:0052712	25	5	0.62532	7.99591	0.000745726	0.0106572	molecular_function:inositol phosphosphingolipid phospholipase activity	Pde4a;Pde9a;Pde4b;Pde4d;Pde3a;
GO:0052713	25	5	0.62532	7.99591	0.000745726	0.0106572	molecular_function:inositol phosphorylceramide phospholipase activity	Pde4a;Pde9a;Pde4b;Pde4d;Pde3a;
GO:0052714	25	5	0.62532	7.99591	0.000745726	0.0106572	molecular_function:mannosyl-inositol phosphorylceramide phospholipase activity	Pde4a;Pde9a;Pde4b;Pde4d;Pde3a;
GO:0052715	25	5	0.62532	7.99591	0.000745726	0.0106572	molecular_function:mannosyl-diinositol phosphorylceramide phospholipase activity	Pde4a;Pde9a;Pde4b;Pde4d;Pde3a;
GO:0055037	90	9	2.25115	3.99795	0.000747729	0.0106593	cellular_component:recycling endosome	Agtr1a;Tnik;Slc9a9;Myo5a;Syt11;Atp11a;Atp9a;Atp11c;Tbc1d14;
GO:0043588	55	7	1.3757	5.0883	0.000791151	0.0112504	biological_process:skin development	Col5a1;Ctnnb1;Ryr1;Sufu;Tcf15;Fras1;Wdr48;
GO:0042787	131	11	3.27668	3.35706	0.000795031	0.0112777	biological_process:ubiquitin-dependent protein catabolic process	Ube3b;Ubr5;Klhl3;6330408A02Rik;Rnf139;Rnf165;Btbd9;Herc2;Rffl;Gm15800;Park2;
GO:0005694	340	20	8.50436	2.35174	0.000822925	0.0114719	cellular_component:chromosome	Rangap1;Smchd1;Suv420h1;Gm960;Setd2;Neil1;Pogz;Tep1;Mad1l1;Topbp1;Nup107;Atrx;Nsd1;Hjurp;Nsfl1c;Nup133;Smg6;Dhx36;Pum3;Smc6;
GO:0030141	111	10	2.77642	3.60176	0.000823243	0.0114719	cellular_component:secretory granule	Myo5a;Gck;Stxbp5l;Pcsk2;Rph3al;Acpp;Gkn1;Ptprn2;Pcsk5;Baiap2;
GO:0010259	14	4	0.350179	11.4227	0.000828694	0.0114719	biological_process:multicellular organism aging	Rnf165;Hyal2;Wrn;Sec63;
GO:0030676	14	4	0.350179	11.4227	0.000828694	0.0114719	molecular_function:Rac guanyl-nucleotide exchange factor activity	Kalrn;Arhgef2;Eps8l1;Tiam1;
GO:0032793	14	4	0.350179	11.4227	0.000828694	0.0114719	biological_process:positive regulation of CREB transcription factor activity	Reln;Prkd1;Camk1d;Cacna1d;
GO:0046907	14	4	0.350179	11.4227	0.000828694	0.0114719	biological_process:intracellular transport	Spire1;Spire2;Appbp2;Ranbp3;
GO:0050673	14	4	0.350179	11.4227	0.000828694	0.0114719	biological_process:epithelial cell proliferation	Hnf1b;Col8a1;Lgr4;BC004004;
GO:0060009	14	4	0.350179	11.4227	0.000828694	0.0114719	biological_process:Sertoli cell development	Dmrt1;Akap9;Atrx;Fndc3a;
GO:0070498	14	4	0.350179	11.4227	0.000828694	0.0114719	biological_process:interleukin-1-mediated signaling pathway	Rps6ka5;Rps6ka4;Plcb1;Tnip2;
GO:0072657	14	4	0.350179	11.4227	0.000828694	0.0114719	biological_process:protein localization to membrane	Pacsin1;Ap3d1;Sh3pxd2b;Tiam1;
GO:0005844	40	6	1.00051	5.99692	0.000863385	0.0118664	cellular_component:polysome	Eef2;Ago2;Atxn2;Dazap1;Ybx3;Piwil2;
GO:0030217	40	6	1.00051	5.99692	0.000863385	0.0118664	biological_process:T cell differentiation	Ctnnb1;Pknox1;Lepr;Nfatc3;Cacnb4;Runx2;
GO:0045494	40	6	1.00051	5.99692	0.000863385	0.0118664	biological_process:photoreceptor cell maintenance	Rp1l1;Ercc6;Bbs2;Ush2a;Mdm1;Adgrv1;
GO:0004115	26	5	0.650333	7.68837	0.000871281	0.0119179	molecular_function:3',5'-cyclic-AMP phosphodiesterase activity	Pde4a;Pde9a;Pde4b;Pde4d;Pde3a;
GO:0030286	26	5	0.650333	7.68837	0.000871281	0.0119179	cellular_component:dynein complex	Dnah17;Dnaic1;Dnah12;Dnah8;Disc1;
GO:0009952	112	10	2.80144	3.5696	0.000877262	0.0119712	biological_process:anterior/posterior pattern specification	Lrp5;Hoxa3;Mllt3;Gli2;Bptf;Ctnnbip1;Pcsk5;Hnf1b;Smad2;Tcf15;
GO:0015992	57	7	1.42573	4.90977	0.000957864	0.0130401	biological_process:proton transmembrane transport	Atp6v0d1;Atp5g1;ATP6;CYTB;Slc4a11;Atp6v0a2;ATP8;
GO:0007568	41	6	1.02553	5.85066	0.000969361	0.0131344	biological_process:aging	ND4;Abat;Gnao1;Pde4d;Akt1;Grb2;
GO:0010811	41	6	1.02553	5.85066	0.000969361	0.0131344	biological_process:positive regulation of cell-substrate adhesion	Prkce;Egflam;Alox15;Col8a1;Fbln2;Vit;
GO:0007269	27	5	0.675346	7.40361	0.00101191	0.0134882	biological_process:neurotransmitter secretion	Syn2;Dgki;Ptprn2;Nrxn1;Nrxn2;
GO:0009117	27	5	0.675346	7.40361	0.00101191	0.0134882	biological_process:nucleotide metabolic process	Fhit;Nudt16;Acpp;Nme7;Nt5c2;
GO:0030659	27	5	0.675346	7.40361	0.00101191	0.0134882	cellular_component:cytoplasmic vesicle membrane	Spire1;Appbp2;Sgsm1;Spire2;Kcnq1;
GO:0031902	27	5	0.675346	7.40361	0.00101191	0.0134882	cellular_component:late endosome membrane	Vti1a;Vps36;Anxa8;Lamp2;March1;
GO:0035255	27	5	0.675346	7.40361	0.00101191	0.0134882	molecular_function:ionotropic glutamate receptor binding	Shank2;ND2;Dlg2;Ctnnb1;Grin2b;
GO:0045499	27	5	0.675346	7.40361	0.00101191	0.0134882	molecular_function:chemorepellent activity	Sema5b;Sema4f;Nrg1;Sema4b;Efna5;
GO:0050770	27	5	0.675346	7.40361	0.00101191	0.0134882	biological_process:regulation of axonogenesis	Ret;Sipa1l1;Ssh2;Slit3;Ephb2;
GO:0045475	15	4	0.375192	10.6612	0.00102938	0.0135637	biological_process:locomotor rhythm	Mta1;Npas2;Mapk10;Kcnma1;
GO:0045725	15	4	0.375192	10.6612	0.00102938	0.0135637	biological_process:positive regulation of glycogen biosynthetic process	Akt1;Igf1;Igf2;Gck;
GO:0048193	15	4	0.375192	10.6612	0.00102938	0.0135637	biological_process:Golgi vesicle transport	Spire1;Rab31;Prkd1;Cyth3;
GO:0050773	15	4	0.375192	10.6612	0.00102938	0.0135637	biological_process:regulation of dendrite development	Rapgef4;Kalrn;Ntrk2;Camk1d;
GO:1901379	15	4	0.375192	10.6612	0.00102938	0.0135637	biological_process:regulation of potassium ion transmembrane transport	Kcnip1;Cacna1d;Kcnip4;Dpp6;
GO:0016323	180	13	4.50231	2.88741	0.0010394	0.0136644	cellular_component:basolateral plasma membrane	P2ry6;Myo1d;Palm;Erbb4;Arrb1;Entpd1;Llgl1;Agtr1a;Rapgef4;Naip1;Kcnq1;Hfe2;Ctnnb1;
GO:0043408	58	7	1.45074	4.82511	0.00105097	0.0137849	biological_process:regulation of MAPK cascade	E130311K13Rik;Ntrk2;Ulk4;Bmp1;Grb2;Bmp5;Grin2b;
GO:0031965	158	12	3.95202	3.03642	0.00106592	0.0139261	cellular_component:nuclear membrane	Osbpl3;Rap1gap2;Rangap1;Akap6;Gsto1;Sun1;Nrxn1;Phf8;Nup107;Syne1;Nup133;Nup93;
GO:0005930	76	8	1.90097	4.20837	0.001069	0.0139261	cellular_component:axoneme	Ccdc40;Atg16l1;Gli2;Traf3ip1;Rp1l1;Ccdc63;Atg7;Sept9;
GO:0060395	76	8	1.90097	4.20837	0.001069	0.0139261	biological_process:SMAD protein signal transduction	Stoml1;Magi2;Ror2;Nup93;Mir7-2;Smad2;Bmp1;Bmp5;
GO:0007265	42	6	1.05054	5.71136	0.00108505	0.0140714	biological_process:Ras protein signal transduction	Ksr1;Prkd1;Sos1;Shtn1;Grb2;Ntn1;
GO:0007628	42	6	1.05054	5.71136	0.00108505	0.0140714	biological_process:adult walking behavior	Kcnma1;Atg7;Cacna1c;Scn8a;Cacnb4;Glra1;
GO:0051647	6	3	0.150077	19.9897	0.00109642	0.0141549	biological_process:nucleus localization	Dmd;Bin1;4932438A13Rik;
GO:0060372	6	3	0.150077	19.9897	0.00109642	0.0141549	biological_process:regulation of atrial cardiac muscle cell membrane repolarization	Cacna1d;Scn5a;Kcnq1;
GO:0007605	137	11	3.42676	3.21003	0.00111581	0.0143729	biological_process:sensory perception of sound	Srrm4;Asic2;Ush2a;Scn8a;Clic5;Kcnma1;Diaph1;Adgrv1;Cacna1d;Col2a1;Serpinb6a;
GO:0005546	59	7	1.47576	4.74333	0.00115102	0.0147563	molecular_function:phosphatidylinositol-4,5-bisphosphate binding	Stxbp6;Alox15;Kcnq1;Cadps;Pard3;Anxa8;Plcb1;
GO:0006338	77	8	1.92599	4.15371	0.00115499	0.0147563	biological_process:chromatin remodeling	Baz1a;Arid1b;Pax7;Bptf;Atrx;Smarca5;Nudt5;Ruvbl1;
GO:0003341	28	5	0.700359	7.1392	0.00116869	0.0147563	biological_process:cilium movement	Ccdc63;Dnaic1;Dnah6;Ccdc40;Cfap221;
GO:0005790	28	5	0.700359	7.1392	0.00116869	0.0147563	cellular_component:smooth endoplasmic reticulum	Ryr1;Plcb4;Ryr3;Kcnn2;Myo1d;
GO:0008094	28	5	0.700359	7.1392	0.00116869	0.0147563	molecular_function:DNA-dependent ATPase activity	Mnat1;Ercc6;Bptf;Dhx36;Rad51b;
GO:0010975	28	5	0.700359	7.1392	0.00116869	0.0147563	biological_process:regulation of neuron projection development	Akt1;Grid2;Il1rapl1;Ulk4;Disc1;
GO:0030316	28	5	0.700359	7.1392	0.00116869	0.0147563	biological_process:osteoclast differentiation	Sbno2;Glo1;Ctnnb1;Gab2;Tnfrsf11a;
GO:0035108	28	5	0.700359	7.1392	0.00116869	0.0147563	biological_process:limb morphogenesis	Lrp5;Idua;Col2a1;Pcsk5;Lmx1b;
GO:0050804	28	5	0.700359	7.1392	0.00116869	0.0147563	biological_process:modulation of chemical synaptic transmission	Reln;Btbd9;Grin2a;Park2;Drd4;
GO:0045892	479	25	11.9811	2.08661	0.00118671	0.014951	biological_process:negative regulation of transcription, DNA-templated	Lrch4;Lgr4;Bend5;Akirin2;Prox1;Sim2;Kdm1a;Sbno2;Smad2;Zfp488;Sox5;Plcb1;Mecom;Nrg1;Pax2;Rasd1;Deaf1;Mta3;Lef1;Runx2;Zhx2;Rps6ka5;Ctnnb1;Prdm16;Atxn1;
GO:0008543	43	6	1.07555	5.57854	0.00121103	0.0151907	biological_process:fibroblast growth factor receptor signaling pathway	Flrt1;Fgfr3;Sos1;Ndst1;Iqgap1;Grb2;
GO:0048706	43	6	1.07555	5.57854	0.00121103	0.0151907	biological_process:embryonic skeletal system development	Sulf2;Deaf1;Pcsk5;Hoxa3;Pax7;Etl4;
GO:0001706	16	4	0.400205	9.99488	0.00126186	0.0155901	biological_process:endoderm formation	Hnf1b;Smad2;Ctnnb1;Dusp4;
GO:0002089	16	4	0.400205	9.99488	0.00126186	0.0155901	biological_process:lens morphogenesis in camera-type eye	Fgfr3;Prox1;Shroom2;Ctnnb1;
GO:0007099	16	4	0.400205	9.99488	0.00126186	0.0155901	biological_process:centriole replication	Cep152;Cntrob;Cenpj;Cdk5rap2;
GO:0032006	16	4	0.400205	9.99488	0.00126186	0.0155901	biological_process:regulation of TOR signaling	Gna12;Slc7a1;Agpat9;Pkhd1;
GO:0045956	16	4	0.400205	9.99488	0.00126186	0.0155901	biological_process:positive regulation of calcium ion-dependent exocytosis	Cacna1g;Cadps;Kcnb1;Cacna1i;
GO:0050877	16	4	0.400205	9.99488	0.00126186	0.0155901	biological_process:nervous system process	Atg7;Cacnb4;Cacna1e;Adgrv1;
GO:0097458	16	4	0.400205	9.99488	0.00126186	0.0155901	cellular_component:neuron part	Cux1;Pcdh9;Grik4;Nkain3;
GO:0007283	357	20	8.92957	2.23975	0.00129763	0.0159976	biological_process:spermatogenesis	Lgr4;Taf4b;Ybx3;Dazap1;Dmrt1;Boll;Akap9;Spata16;Atrx;Wipf3;Ccdc63;Spata5;Wdr48;Ak7;Ttll5;Herc2;4932438A13Rik;Lamp1;Clgn;Piwil2;
GO:0015078	29	5	0.725372	6.89302	0.00134273	0.0163779	molecular_function:proton transmembrane transporter activity	Atp6v0d1;ATP6;Atp6v0a2;ATP8;Atp5g1;
GO:0045296	29	5	0.725372	6.89302	0.00134273	0.0163779	molecular_function:cadherin binding	Ptprt;Cdh13;Ctnnb1;Ctnna3;Ptprm;
GO:0045840	29	5	0.725372	6.89302	0.00134273	0.0163779	biological_process:positive regulation of mitotic nuclear division	Dmrt1;Lrp5;Igf1;Igf1r;Igf2;
GO:0046875	29	5	0.725372	6.89302	0.00134273	0.0163779	molecular_function:ephrin receptor binding	Anks1;Tiam1;Sipa1l1;Grb2;Efna5;
GO:0048709	29	5	0.725372	6.89302	0.00134273	0.0163779	biological_process:oligodendrocyte differentiation	Sox5;Dusp10;Ntrk2;Nrg1;Exoc4;
GO:0072686	44	6	1.10056	5.45175	0.00134789	0.016406	cellular_component:mitotic spindle	Eml4;Pkhd1;Mad1l1;Rangap1;Diaph1;Ttc28;
GO:0003924	186	13	4.65238	2.79427	0.00137031	0.0166436	molecular_function:GTPase activity	Gna12;Eef2;Atl1;Gtpbp2;Rab3c;Opa1;Eefsec;Agap1;Atl2;Gtpbp1;Gnao1;Gng4;Dnm3;
GO:0006606	61	7	1.52578	4.58781	0.00137343	0.0166464	biological_process:protein import into nucleus	Nup133;Rae1;Nup93;l7Rn6;Pttg1ip;Stat3;Nup107;
GO:0008283	211	14	5.2777	2.65267	0.00145577	0.0176071	biological_process:cell proliferation	Tacc1;Lmx1b;Lrp1;Dazap1;Kdm1a;Stat3;Gli2;Ctnnb1;Brat1;Mina;Cdk5rap3;Tacc2;Igf1;Fbxl7;
GO:0005776	45	6	1.12558	5.3306	0.00149623	0.0176693	cellular_component:autophagosome	Tbc1d5;Atg16l1;Osbpl7;Vti1a;Pip4k2a;Tbc1d14;
GO:0006836	45	6	1.12558	5.3306	0.00149623	0.0176693	biological_process:neurotransmitter transport	Rims4;Slc6a9;Sv2b;Slc6a3;Rims3;Slc6a11;
GO:0030136	45	6	1.12558	5.3306	0.00149623	0.0176693	cellular_component:clathrin-coated vesicle	Lrp1;Clvs1;Vti1a;Dennd1a;Ston2;Rgs19;
GO:0034707	45	6	1.12558	5.3306	0.00149623	0.0176693	cellular_component:chloride channel complex	Best3;Ano2;Gabrg3;Clic5;Ano1;Glra1;
GO:0005643	62	7	1.55079	4.51382	0.00149652	0.0176693	cellular_component:nuclear pore	Nup133;Mad1l1;Rangap1;Rae1;Nup93;Xpo7;Nup107;
GO:0008542	62	7	1.55079	4.51382	0.00149652	0.0176693	biological_process:visual learning	Cacna1e;App;Deaf1;Grin2a;Meis2;Cacna1c;Atxn1;
GO:0014068	62	7	1.55079	4.51382	0.00149652	0.0176693	biological_process:positive regulation of phosphatidylinositol 3-kinase signaling	Ntrk2;Nrg1;Igf1r;Erbb4;Reln;Igf1;Prr5;
GO:0002063	17	4	0.425218	9.40694	0.00152868	0.0176693	biological_process:chondrocyte development	Chsy1;Sulf2;Chst11;Runx2;
GO:0004435	17	4	0.425218	9.40694	0.00152868	0.0176693	molecular_function:phosphatidylinositol phospholipase C activity	Plcb3;Plcb4;Plcg1;Plcb1;
GO:0005614	17	4	0.425218	9.40694	0.00152868	0.0176693	cellular_component:interstitial matrix	Igf1;Col14a1;Egflam;Vit;
GO:0035082	17	4	0.425218	9.40694	0.00152868	0.0176693	biological_process:axoneme assembly	Rp1l1;Ccdc40;Ak7;Cc2d2a;
GO:0035371	17	4	0.425218	9.40694	0.00152868	0.0176693	cellular_component:microtubule plus-end	Mapre3;Myo5a;Kif18b;Cdk5rap2;
GO:0090201	17	4	0.425218	9.40694	0.00152868	0.0176693	biological_process:negative regulation of release of cytochrome c from mitochondria	Akt1;Park2;Igf1;Opa1;
GO:0019933	30	5	0.750384	6.66326	0.00153515	0.0176693	biological_process:cAMP-mediated signaling	Ksr1;Adcy1;Ndufs4;Rapgef4;Pde3a;
GO:0032154	30	5	0.750384	6.66326	0.00153515	0.0176693	cellular_component:cleavage furrow	Spire1;Lima1;Spn;Mylk;Spire2;
GO:0032420	30	5	0.750384	6.66326	0.00153515	0.0176693	cellular_component:stereocilium	Bbs2;Ush2a;Eps8;Clic5;Adgrv1;
GO:0035058	30	5	0.750384	6.66326	0.00153515	0.0176693	biological_process:non-motile cilium assembly	Cep89;Bbs2;Cenpj;Disc1;Cc2d2a;
GO:0001514	7	3	0.17509	17.134	0.0015378	0.0176693	biological_process:selenocysteine incorporation	Secisbp2l;Sepsecs;Eefsec;
GO:0007215	7	3	0.17509	17.134	0.0015378	0.0176693	biological_process:glutamate receptor signaling pathway	Grik3;Plcb1;Kcnb1;
GO:0021517	7	3	0.17509	17.134	0.0015378	0.0176693	biological_process:ventral spinal cord development	Reln;Vldlr;Gli2;
GO:0022038	7	3	0.17509	17.134	0.0015378	0.0176693	biological_process:corpus callosum development	Ulk4;Ptprs;Ephb2;
GO:0022900	7	3	0.17509	17.134	0.0015378	0.0176693	biological_process:electron transport chain	COX2;Ndufs4;Wdr93;
GO:0042297	7	3	0.17509	17.134	0.0015378	0.0176693	biological_process:vocal learning	Nrxn1;Cntnap2;Nrxn2;
GO:0070531	7	3	0.17509	17.134	0.0015378	0.0176693	cellular_component:BRCA1-A complex	Bard1;Babam1;Bre;
GO:2000344	7	3	0.17509	17.134	0.0015378	0.0176693	biological_process:positive regulation of acrosome reaction	Plb1;Glra1;Plcb1;
GO:0042981	189	13	4.72742	2.74991	0.00156602	0.0179576	biological_process:regulation of apoptotic process	Lrp5;Rbm5;Tnfrsf11a;Ank2;Pax2;Gm4862;Bmp5;Wrn;Cflar;Ikzf3;Ctnnb1;Madd;Bmp1;
GO:0005791	63	7	1.57581	4.44217	0.00162802	0.0186314	cellular_component:rough endoplasmic reticulum	Ntrk2;Sppl3;App;Cdkal1;Bglap3;Rangrf;Htr7;
GO:0045087	382	21	9.5549	2.19783	0.00164872	0.0188308	biological_process:innate immune response	Lgr4;Akirin2;Hc;Cd244;Zc3hav1;Sp110;Mst1r;Clec4a2;Tec;Map3k5;Klrg1;Ppp1r14b;Spon2;Syk;Defb43;Arhgef2;C1rb;C2;Prkd1;C9;Defb36;
GO:0004872	167	12	4.17714	2.87278	0.00165386	0.0188467	molecular_function:signaling receptor activity	Tnfrsf13b;Grid2;Grin2a;Ephb2;Cd244;Grik4;Gipr;Gfra1;Grik3;Grik5;Cd200r2;Grin2b;
GO:0001657	46	6	1.15059	5.21472	0.00165667	0.0188467	biological_process:ureteric bud development	Rarb;Robo2;Pax2;Smad2;Ret;Crlf1;
GO:0016337	102	9	2.55131	3.5276	0.00168169	0.0190935	biological_process:cell-cell adhesion	Ctnnd2;Pard3;Adgrv1;Ctnnb1;Ctnna3;Plpp3;Crisp2;Fndc3a;Ntn1;
GO:0007595	31	5	0.775397	6.44831	0.00174708	0.0196419	biological_process:lactation	Xdh;Stat5b;Slc6a3;Aprt;Erbb4;
GO:0015914	31	5	0.775397	6.44831	0.00174708	0.0196419	biological_process:phospholipid transport	Atp11a;Atp9b;Atp9a;Atp11c;Pitpna;
GO:0051020	31	5	0.775397	6.44831	0.00174708	0.0196419	molecular_function:GTPase binding	Bin1;Sh3gl1;Lcp1;Ppp1r9a;Golga4;
GO:0051209	31	5	0.775397	6.44831	0.00174708	0.0196419	biological_process:release of sequestered calcium ion into cytosol	Ryr1;Prkce;Ryr3;Htr1f;Tpcn2;
GO:0072332	31	5	0.775397	6.44831	0.00174708	0.0196419	biological_process:intrinsic apoptotic signaling pathway by p53 class mediator	Bbc3;Zmat4;Fhit;Jmy;Zfp385a;
GO:0007018	64	7	1.60082	4.37276	0.00176833	0.0198032	biological_process:microtubule-based movement	Dnah17;Kifc2;Kif14;Dnah12;Kif18b;Dnah8;Kif26b;
GO:0031463	64	7	1.60082	4.37276	0.00176833	0.0198032	cellular_component:Cul3-RING ubiquitin ligase complex	Kctd13;Klhl38;Klhl40;Klhl3;Klhl14;Kbtbd3;Klhl18;
GO:0007611	47	6	1.1756	5.10377	0.00182983	0.019975	biological_process:learning or memory	Esr2;Grin2a;Prkca;Lamb1;Grin2b;Zfp385a;
GO:0030971	47	6	1.1756	5.10377	0.00182983	0.019975	molecular_function:receptor tyrosine kinase binding	Hyal2;Ntrk2;Tiam1;Nrg1;Plcg1;Shc2;
GO:0051592	47	6	1.1756	5.10377	0.00182983	0.019975	biological_process:response to calcium ion	Slc25a12;Gipr;Kcnma1;Mnat1;CYTB;Itpr3;
GO:0000145	18	4	0.450231	8.88433	0.00183235	0.019975	cellular_component:exocyst	Exoc6;Stxbp6;Exoc6b;Exoc4;
GO:0004550	18	4	0.450231	8.88433	0.00183235	0.019975	molecular_function:nucleoside diphosphate kinase activity	Ak5;Gm4862;Nme7;Ak7;
GO:0010842	18	4	0.450231	8.88433	0.00183235	0.019975	biological_process:retina layer formation	Sdk2;Fat3;Ptprm;Megf11;
GO:0032331	18	4	0.450231	8.88433	0.00183235	0.019975	biological_process:negative regulation of chondrocyte differentiation	Gli2;Ctnnb1;Rarb;Adamts12;
GO:0042220	18	4	0.450231	8.88433	0.00183235	0.019975	biological_process:response to cocaine	Adgrl3;Abat;Slc6a3;Pgr;
GO:0042325	18	4	0.450231	8.88433	0.00183235	0.019975	biological_process:regulation of phosphorylation	Ppp1r14b;Bard1;Rptor;Phactr1;
GO:0043296	18	4	0.450231	8.88433	0.00183235	0.019975	cellular_component:apical junction complex	Ccdc85c;Shroom2;Ctnnb1;Pard3;
GO:0043536	18	4	0.450231	8.88433	0.00183235	0.019975	biological_process:positive regulation of blood vessel endothelial cell migration	Akt1;Plcg1;Prkd1;Prkca;
GO:0044306	18	4	0.450231	8.88433	0.00183235	0.019975	cellular_component:neuron projection terminus	Bsn;Flrt1;Vti1a;Dmd;
GO:0051393	18	4	0.450231	8.88433	0.00183235	0.019975	molecular_function:alpha-actinin binding	Cacna1c;Ptprt;Cacna1d;Magi1;
GO:0060996	18	4	0.450231	8.88433	0.00183235	0.019975	biological_process:dendritic spine development	Spire1;Pak4;Arid1b;Ephb2;
GO:0001933	84	8	2.10108	3.80757	0.00192249	0.0208785	biological_process:negative regulation of protein phosphorylation	Prkca;Xdh;Traf3ip1;Cd109;Cdk5rap3;Plpp3;Park2;Arrb1;
GO:0051117	84	8	2.10108	3.80757	0.00192249	0.0208785	molecular_function:ATPase binding	Bbc3;Grin2a;Nsfl1c;Ank2;Pde4d;Atp6v0a2;Ruvbl1;Pgr;
GO:0010468	284	17	7.10364	2.39314	0.00195936	0.0212388	biological_process:regulation of gene expression	Reln;Setd2;Lmx1b;Prox1;App;Apba2;Tcf15;Asic2;Pax7;Msantd1;Trp73;Vav2;Atraid;Ctnnb1;Dmd;Igf1;Col2a1;
GO:0005549	367	1	9.1797	0.108936	0.0019682	0.0212944	molecular_function:odorant binding	Olfr970;
GO:0030032	32	5	0.80041	6.2468	0.00197967	0.0213782	biological_process:lamellipodium assembly	Vav2;Cdh13;Parvb;Ptpro;Fgd4;
GO:0016459	48	6	1.20061	4.99744	0.00201635	0.0216927	cellular_component:myosin complex	Myo5a;Myh11;Myo18a;Myo1d;Myl2;Myo16;
GO:0060048	48	6	1.20061	4.99744	0.00201635	0.0216927	biological_process:cardiac muscle contraction	Scn5a;Ank2;Dmd;Myl2;Kcnq1;Map2k6;
GO:0006020	8	3	0.200103	14.9923	0.00207604	0.0217738	biological_process:inositol metabolic process	Slc5a3;Ppip5k1;Impa2;
GO:0006892	8	3	0.200103	14.9923	0.00207604	0.0217738	biological_process:post-Golgi vesicle-mediated transport	Plcb3;Nbea;Myo5a;
GO:0030314	8	3	0.200103	14.9923	0.00207604	0.0217738	cellular_component:junctional membrane complex	Ryr1;Jph1;Ryr3;
GO:0030856	8	3	0.200103	14.9923	0.00207604	0.0217738	biological_process:regulation of epithelial cell differentiation	Ctnnb1;Stat5b;Xdh;
GO:0034993	8	3	0.200103	14.9923	0.00207604	0.0217738	cellular_component:meiotic nuclear membrane microtubule tethering complex	Syne1;Sun1;Sun3;
GO:0036157	8	3	0.200103	14.9923	0.00207604	0.0217738	cellular_component:outer dynein arm	Dnah8;Dnaic1;Dnah17;
GO:0042596	8	3	0.200103	14.9923	0.00207604	0.0217738	biological_process:fear response	Drd4;Cacna1e;Grin2b;
GO:0044321	8	3	0.200103	14.9923	0.00207604	0.0217738	biological_process:response to leptin	Bbs2;Stat3;Lepr;
GO:0047372	8	3	0.200103	14.9923	0.00207604	0.0217738	molecular_function:acylglycerol lipase activity	Lipc;Mgll;Abhd6;
GO:0060371	8	3	0.200103	14.9923	0.00207604	0.0217738	biological_process:regulation of atrial cardiac muscle cell membrane depolarization	Cacna1g;Scn5a;Scn10a;
GO:0060603	8	3	0.200103	14.9923	0.00207604	0.0217738	biological_process:mammary gland duct morphogenesis	Lrp5;Ntn1;Gli2;
GO:0071294	8	3	0.200103	14.9923	0.00207604	0.0217738	biological_process:cellular response to zinc ion	Gpr39;Glra1;Grin2a;
GO:0090286	8	3	0.200103	14.9923	0.00207604	0.0217738	biological_process:cytoskeletal anchoring at nuclear membrane	Syne1;Sun1;Sun3;
GO:0000724	66	7	1.65085	4.24025	0.00207694	0.0217738	biological_process:double-strand break repair via homologous recombination	Mcm9;Rad51b;Zfyve26;Spidr;Oraov1;Smc6;Wdr48;
GO:0048511	127	10	3.17663	3.14799	0.00210099	0.0219858	biological_process:rhythmic process	Npas2;Grin2a;Mapk10;Lgr4;Adcy1;Mta1;Prox1;Drd4;Rora;Grin2b;
GO:0000242	19	4	0.475243	8.41675	0.00217536	0.0224371	cellular_component:pericentriolar material	Akap9;Cep152;Cep85;Cdk5rap2;
GO:0003746	19	4	0.475243	8.41675	0.00217536	0.0224371	molecular_function:translation elongation factor activity	Eefsec;Gtpbp1;Gtpbp2;Eef2;
GO:0006998	19	4	0.475243	8.41675	0.00217536	0.0224371	biological_process:nuclear envelope organization	Dmpk;Sun1;Sun3;Nup93;
GO:0008157	19	4	0.475243	8.41675	0.00217536	0.0224371	molecular_function:protein phosphatase 1 binding	Pawr;Phactr1;Ppp1r9a;Kcnq1;
GO:0016601	19	4	0.475243	8.41675	0.00217536	0.0224371	biological_process:Rac protein signal transduction	Cdh13;Eps8l1;Tiam1;Eps8;
GO:0032588	19	4	0.475243	8.41675	0.00217536	0.0224371	cellular_component:trans-Golgi network membrane	Rab31;Llgl1;Scamp2;March1;
GO:0048747	19	4	0.475243	8.41675	0.00217536	0.0224371	biological_process:muscle fiber development	Lef1;Dmd;Cacnb4;Myl2;
GO:0060077	19	4	0.475243	8.41675	0.00217536	0.0224371	cellular_component:inhibitory synapse	Bsn;Syt11;Gphn;Glra1;
GO:0005814	86	8	2.1511	3.71902	0.00220273	0.0226469	cellular_component:centriole	Agbl4;Cep104;Cenpj;Cep152;Agbl2;Cntrob;Cep89;Mdm1;
GO:0030246	197	13	4.92752	2.63824	0.00220359	0.0226469	molecular_function:carbohydrate binding	Mrc2;Klra7;Galnt13;Galnt16;Atrnl1;Man2a1;Itln1;Adgrl3;Klra1;Clec4a2;Galnt2;Ncan;Klrg1;
GO:0001755	49	6	1.22563	4.89545	0.00221687	0.0227021	biological_process:neural crest cell migration	Sema4f;Erbb4;Sema5b;Lef1;Ret;Sema4b;
GO:0042752	49	6	1.22563	4.89545	0.00221687	0.0227021	biological_process:regulation of circadian rhythm	Npas2;Mapk10;Prox1;Adcy1;Drd4;Rora;
GO:0001965	33	5	0.825423	6.0575	0.00223406	0.0227163	molecular_function:G-protein alpha-subunit binding	Agtr1a;Igf1r;Ric8b;Kcnj6;Rgs19;
GO:0006139	33	5	0.825423	6.0575	0.00223406	0.0227163	biological_process:nucleobase-containing compound metabolic process	Ak5;Wrn;Srbd1;Nudt5;Ak7;
GO:0015485	33	5	0.825423	6.0575	0.00223406	0.0227163	molecular_function:cholesterol binding	Osbpl3;Osbpl7;Osbp2;Stard5;Osbpl10;
GO:0046326	33	5	0.825423	6.0575	0.00223406	0.0227163	biological_process:positive regulation of glucose import	Mgea5;Erbb4;Itln1;Akt1;Igf1;
GO:0007601	129	10	3.22665	3.09919	0.00233632	0.0237141	biological_process:visual perception	Myo5a;Rdh8;Ush2a;Opa1;Bfsp2;Adgrv1;Rp1l1;Bbs2;Col2a1;Glra1;
GO:0006631	152	11	3.80195	2.89325	0.00240197	0.0243374	biological_process:fatty acid metabolic process	Elovl5;Mgll;Hacd4;Acsm1;Ankrd23;Lipc;Prkag2;Acox3;Alox15;Stat5b;Ptgs1;
GO:0009887	108	9	2.70138	3.33163	0.00241362	0.0244124	biological_process:animal organ morphogenesis	Slit3;Igf1r;Hoxa3;Pax7;Ephb2;Igf2;Wnt2b;Ndst1;Treh;
GO:0004702	68	7	1.70087	4.11554	0.00242557	0.0244267	molecular_function:obsolete signal transducer, downstream of receptor, with serine/threonine kinase activity	Tnik;Map2k5;Map4k3;Map2k6;Pak4;Stk4;Taok1;
GO:0043130	68	7	1.70087	4.11554	0.00242557	0.0244267	molecular_function:ubiquitin binding	Ubr5;Vps28;Rae1;Faf1;Nsfl1c;Park2;Vps36;
GO:0003730	50	6	1.25064	4.79754	0.00243204	0.0244267	molecular_function:mRNA 3'-UTR binding	Boll;Ybx3;Secisbp2l;Rbms3;Zfp385a;Cryz;
GO:0014704	50	6	1.25064	4.79754	0.00243204	0.0244267	cellular_component:intercalated disc	Scn5a;Ank2;Ctnnb1;Ankrd23;Rangrf;Akap6;
GO:0048013	34	5	0.850436	5.87934	0.00251143	0.02518	biological_process:ephrin receptor signaling pathway	Anks1;Tiam1;Sipa1l1;Efna5;Ephb2;
GO:0005102	405	21	10.1302	2.07301	0.00255341	0.0255563	molecular_function:signaling receptor binding	Prkce;Gphn;Slit3;Ephb2;Il1rapl1;Wnt2b;App;Nrxn1;Syne1;Traf3ip1;Hfe2;Nrg2;Slc6a3;Idua;Spon2;Grin2a;Syk;Lama2;Traf3ip2;Acox3;Grin2b;
GO:0015986	20	4	0.500256	7.99591	0.00256018	0.0255795	biological_process:ATP synthesis coupled proton transport	ATP6;Atp6v0a2;ATP8;Atp5g1;
GO:0006633	69	7	1.72588	4.05589	0.00261592	0.0260911	biological_process:fatty acid biosynthetic process	Elovl5;Mgll;Hacd4;Acsm1;Lipc;Ptgs1;Prkag2;
GO:0016887	178	12	4.45228	2.69525	0.00271004	0.0265232	molecular_function:ATPase activity	Kif14;Abcb5;Ruvbl1;Entpd1;Abcb10;Dnah17;Wrn;Dnah12;Dnah8;Kifc2;Abcb9;Smarca5;
GO:0005068	9	3	0.225115	13.3265	0.00271779	0.0265232	molecular_function:transmembrane receptor protein tyrosine kinase adaptor activity	Sh2d3c;Gab2;Pag1;
GO:0008066	9	3	0.225115	13.3265	0.00271779	0.0265232	molecular_function:glutamate receptor activity	Grik5;Grik3;Grm4;
GO:0016043	9	3	0.225115	13.3265	0.00271779	0.0265232	biological_process:cellular component organization	Daam1;Diaph1;Fmnl3;
GO:0030166	9	3	0.225115	13.3265	0.00271779	0.0265232	biological_process:proteoglycan biosynthetic process	Man1c1;Igf1;Csgalnact2;
GO:0036156	9	3	0.225115	13.3265	0.00271779	0.0265232	cellular_component:inner dynein arm	Dnah1;Dnah6;Dnah12;
GO:0046085	9	3	0.225115	13.3265	0.00271779	0.0265232	biological_process:adenosine metabolic process	Acpp;Adk;Nt5c2;
GO:0046850	9	3	0.225115	13.3265	0.00271779	0.0265232	biological_process:regulation of bone remodeling	Lrp5;Lepr;Fgfr3;
GO:0051127	9	3	0.225115	13.3265	0.00271779	0.0265232	biological_process:positive regulation of actin nucleation	Fmn1;Wipf1;Wipf3;
GO:0070286	9	3	0.225115	13.3265	0.00271779	0.0265232	biological_process:axonemal dynein complex assembly	Ccdc40;Drc1;Dnaaf3;
GO:0071872	9	3	0.225115	13.3265	0.00271779	0.0265232	biological_process:cellular response to epinephrine stimulus	Akap6;Pde4b;Pde4d;
GO:0090394	9	3	0.225115	13.3265	0.00271779	0.0265232	biological_process:negative regulation of excitatory postsynaptic potential	Celf4;Park2;S1pr2;
GO:0018105	132	10	3.30169	3.02875	0.0027285	0.0265232	biological_process:peptidyl-serine phosphorylation	Prkce;Syk;Prkca;Dmpk;Stk4;Dclk1;Camk2b;Akt1;Stk32a;Prkd1;
GO:0031175	132	10	3.30169	3.02875	0.0027285	0.0265232	biological_process:neuron projection development	Lingo1;Cntnap2;Ppp1r9a;Atg7;Lamb1;App;Igf1r;Gfra1;Diaph1;Ptprm;
[truncated: 210 more rows]

## Sheet: Table 19
Supplemental Table S19 Lists of DEGs between BaP-NTD and controls.
[truncated: 1,502 more rows]

[truncated: 8 more sheets: Table 20, Table 21, Table 22, Table 23, Table 24, Table S25, Table S26, Table S27]
